# Supplementary material for: Global, regional and national burden of inflammatory bowel disease in 204 countries and territories from 1990 to 2019: a systematic analysis based on the Global Burden of Disease Study 2019
Source: PubMed Central journal article supplement — BMJ Open. 2023 Mar 28;13(3):e065186. doi: 10.1136/bmjopen-2022-065186 (PMC10069527; doi:10.1136/bmjopen-2022-065186), 2023-03-28
Supplement: bmjopen-2022-065186.draft_revisions.pdf [file bmjopen-2022-065186.draft_revisions.pdf]

# BMJ Open

BMJ Open is committed to open peer review. As part of this commitment we make the peer review history of every article we publish publicly available.

When an article is published we post the peer reviewers' comments and the authors' responses online. We also post the versions of the paper that were used during peer review. These are the versions that the peer review comments apply to.

The versions of the paper that follow are the versions that were submitted during the peer review process. They are not the versions of record or the final published versions. They should not be cited or distributed as the published version of this manuscript.

BMJ Open is an open access journal and the full, final, typeset and author-corrected version of record of the manuscript is available on our site with no access controls, subscription charges or pay-per-view fees (<http://bmjopen.bmj.com>).

If you have any questions on BMJ Open's open peer review process please email [info.bmjopen@bmj.com](mailto:info.bmjopen@bmj.com)

# BMJ Open

## The global, regional and national burden of inflammatory bowel disease in 204 countries and territories from 1990 to 2019, based on Global Burden Disease Study 2019

|                               |                                                                                                                                                                                                                                                                                                                                |
|-------------------------------|--------------------------------------------------------------------------------------------------------------------------------------------------------------------------------------------------------------------------------------------------------------------------------------------------------------------------------|
| Journal:                      | <i>BMJ Open</i>                                                                                                                                                                                                                                                                                                                |
| Manuscript ID                 | bmjopen-2022-065186                                                                                                                                                                                                                                                                                                            |
| Article Type:                 | Original research                                                                                                                                                                                                                                                                                                              |
| Date Submitted by the Author: | 01-Jun-2022                                                                                                                                                                                                                                                                                                                    |
| Complete List of Authors:     | Wang, Rui; Central South University Third Xiangya Hospital; Central South University Third Xiangya Hospital<br>Li, Zhaoqi; Central South University Third Xiangya Hospital<br>Liu, Shaojun; Central South University Third Xiangya Hospital<br>Zhang, Decai; Central South University Third Xiangya Hospital, Gastroenterology |
| Keywords:                     | Inflammatory bowel disease < GASTROENTEROLOGY, EPIDEMIOLOGY, Gastroenterology < INTERNAL MEDICINE                                                                                                                                                                                                                              |
|                               |                                                                                                                                                                                                                                                                                                                                |

SCHOLARONE™  
Manuscripts

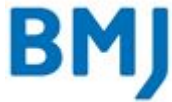

I, the Submitting Author has the right to grant and does grant on behalf of all authors of the Work (as defined in the below author licence), an exclusive licence and/or a non-exclusive licence for contributions from authors who are: i) UK Crown employees; ii) where BMJ has agreed a CC-BY licence shall apply, and/or iii) in accordance with the terms applicable for US Federal Government officers or employees acting as part of their official duties; on a worldwide, perpetual, irrevocable, royalty-free basis to BMJ Publishing Group Ltd ("BMJ") its licensees and where the relevant Journal is co-owned by BMJ to the co-owners of the Journal, to publish the Work in this journal and any other BMJ products and to exploit all rights, as set out in our [licence](#).

The Submitting Author accepts and understands that any supply made under these terms is made by BMJ to the Submitting Author unless you are acting as an employee on behalf of your employer or a postgraduate student of an affiliated institution which is paying any applicable article publishing charge ("APC") for Open Access articles. Where the Submitting Author wishes to make the Work available on an Open Access basis (and intends to pay the relevant APC), the terms of reuse of such Open Access shall be governed by a Creative Commons licence – details of these licences and which [Creative Commons](#) licence will apply to this Work are set out in our licence referred to above.

Other than as permitted in any relevant BMJ Author's Self Archiving Policies, I confirm this Work has not been accepted for publication elsewhere, is not being considered for publication elsewhere and does not duplicate material already published. I confirm all authors consent to publication of this Work and authorise the granting of this licence.

1  
2  
3  
4 **The global, regional and national burden of inflammatory bowel disease in 204**  
5 **countries and territories from 1990 to 2019, based on Global Burden Disease**  
6 **Study 2019**  
7  
8  
9

10  
11 Rui Wang<sup>1,2</sup>, Zhaoqi Li<sup>1,2</sup>, Shaojun Liu<sup>1,2</sup>, Decai Zhang<sup>1,2\*</sup>  
12  
13

14  
15 1 Department of Gastroenterology, The Third Xiangya Hospital of Central South  
16 University, Changsha 410013, Hunan Province, China.  
17

18  
19 2 Hunan Key Laboratory of Nonresolving Inflammation and Cancer, Changsha  
20 410013, Hunan Province, China  
21  
22

23  
24  
25 \*Correspondence: Decai Zhang, Department of Gastroenterology, The Third Xiangya  
26 Hospital of Central South University, Changsha 410013, Hunan Province, China.  
27

28  
29 Email: decaizhang@csu.edu.cn  
30  
31

32  
33 Running title: Global burden of inflammatory bowel disease  
34  
35  
36  
37  
38  
39  
40  
41  
42  
43  
44  
45  
46  
47  
48  
49  
50  
51  
52  
53  
54  
55  
56  
57  
58  
59  
60



## Abstract

**Objectives** We aim to provide the most updated estimates on the global burden of inflammatory bowel disease (IBD) to improve management strategies.

**Design** We extracted data from the Global Burden of Disease (GBD) 2019 database to evaluate IBD burden with different measures in 204 countries and territories from 1990 to 2019.

**Setting** Studies from the GBD 2019 database generated by population-representative data sources identified through literature review and research collaborations were included.

**Participants** Patients with IBD diagnosis.

**Outcomes** Total numbers, age-standardised rates of prevalence, mortality and disability-adjusted life year (DALY), and their estimated annual percentage changes (EAPCs) were the main outcomes.

**Results** In 2019, there were approximately 4.9 million cases of IBD globally, with China and the United States had the highest number of cases [911405 and 762890 respectively (66.9 and 245.3 cases per 100 000 population respectively)]. Between 1990 and 2019, the global age-standardised rates of prevalence, deaths, and DALYs decreased (EAPC = -0.66, -0.69, and -1.04, respectively). However, age-standardised prevalence rate increased in 13 out of 21 GBD regions. And a total of 147 out of 204 countries or territories experienced an increase in age-standardised prevalence rate. From 1990 to 2019, IBD prevalent cases, deaths and DALYs were higher in females than males. Higher SDI was associated with higher age-standardised prevalence rates.

**Conclusions** IBD will continue to be a major public health burden due to increasing numbers of prevalent cases, deaths, and DALYs. The epidemiology trends and disease burden of IBD have changed dramatically at regional and national level, so understanding these changes would be beneficial for policy makers to tackle IBD.

**Keywords:** Inflammatory bowel disease; Global burden of disease; Prevalence; Disability-adjusted life years; Estimated annual percentage change.

### **Strengths and limitations of this study**

This is the most updated estimate on IBD epidemiology globally, including 204 countries some of which were not assessed before.

GBD 2019 incorporated more studies, adjusted diagnostic criteria, and further improved data reliability, hence, presenting data more representative to individuals.

One of the limitations is heterogeneity in population and location between studies included.

Another limitation is the variability in study design and data collection methods also affects the precision of the estimates, which is only partially compensated in our analysis model.

## Introduction

Inflammatory bowel diseases (IBDs), including Crohn's disease and ulcerative colitis, are debilitating and chronic inflammatory disorders of the gastrointestinal tract that have no cure.<sup>1</sup> IBD is characterised by a relapsing-remitting course and a heterogeneous clinical presentation that includes episodes of abdominal pain, chronic diarrhea, rectal bleeding, and weight loss, which are often associated with systemic symptoms such as fatigue and occasionally fever.<sup>2</sup> Because IBD can cause significant morbidity and lead to complications such as strictures, fistulas, infections, and cancer, this disorder lead to substantial health care costs and place a great stress on health care systems.<sup>3,4</sup> Although the cause of IBD remains unknown, the pathogenesis of IBD is suggested to be associated with genetic susceptibility of the host, intestinal microbiota, other environmental factors (e.g., diet, smoking, and physiological stress), and immunological abnormalities.<sup>5</sup>

Traditionally, IBD has been regarded as a disease of the western world; however, studies over the last two decades have shown a rapid increasing incidence in newly industrialized countries in the Middle East, Asia, and South America.<sup>6</sup> Conversely, IBD incident rates appear to be plateauing in the Western world in the 21st century.<sup>7</sup> These significant changes highlights the need for a comparable, consistent and systematic analysis of disease burden and trends concerning IBD in different regions and countries, which can be used to give a convincing evidence for rational allocation of resources and health care planning in reducing the global burden of IBD.

The Global Burden of Diseases (GBD) 2019 Study, a systematical worldwide epidemiological study most recently, assessed prevalence, morbidity, mortality, disability of 369 diseases by location, sex, age and year,<sup>8</sup> which provides a unique opportunity to understand the state of IBD. The purpose of this study was to use data from GBD 2019 study to determine the global, regional and national burden of IBD across 204 countries and territories from 1990 to 2019 by age, gender and social-development index (SDI).

## Methods

1  
2  
3  
4 The general methodology of GBD 2019 has been reported in detail in previous  
5 publications.<sup>8-11</sup> In brief, GBD Study collected data from censuses, household  
6 surveys, civil registration and vital statistics, disease registries, health service use,  
7 satellite imaging, disease notifications, and other sources.<sup>9</sup> A Bayesian  
8 meta-regression modelling tool, DisMod-MR 2.1, was used to model and derive  
9 estimates of the burden under several conditions in 204 countries and territories from  
10 1990 to 2019.<sup>9</sup> The model included all of the above available information for each  
11 disease and applied correcting process for known bias to derive country-specific  
12 estimates of prevalence and of the burden of diseases, which have been described in  
13 previous studies.<sup>8</sup> Uncertainty intervals (UIs) were generated for every metric using  
14 the 25th and 975th ordered 1000 draw values of the posterior distribution.<sup>9</sup>

15  
16 We extracted from the GBD database yearly crude and age-standardised estimates  
17 of different measures of the burden of IBD from 1990 to 2019 and the respective 95%  
18 UIs via the Global Health Data Exchange (GHDx) query tool (<http://ghdx.healthdata.org/gbd-results-tool>). For the GBD 2019 assessment, IBD was defined  
19 according to 10th revisions of the International Classification of Diseases (ICD-10:  
20 K50-K51.319, K51.5-K52, K52.8-K52.9). The variables obtained from the database  
21 included prevalent cases, death numbers, disability-adjusted life-years (DALYs)  
22 numbers, years of life lost (YLLs) numbers, years lived with disability (YLDs)  
23 numbers, and their corresponding age-standardised rates (ASRs) at the global,  
24 regional, and national levels. Prevalence rate (per 100 000) was defined as aggregated  
25 cases (including new cases and previously diagnosed cases) divided by the population  
26 size; mortality rate (per 100 000) was defined as the number of annual deaths divided  
27 by the total population size, and DALYs were calculated as the sum of YLLs and  
28 YLDs. These data were stratified by age (1-4, 5-9, every 5-year age group up to 95  
29 years, and 95 years and older), calendar year (1990-2019), region, and country (or  
30 territory). Geographically, the world was classified into 21 regions. Moreover, 204  
31 countries and territories were divided into five categories, according to the  
32 socio-demographic index (SDI), the geometric average of total fertility, per capita  
33 income, and average years of education, ranging from zero to one.<sup>12</sup> The larger the  
34  
35  
36  
37  
38  
39  
40  
41  
42  
43  
44  
45  
46  
47  
48  
49  
50  
51  
52  
53  
54  
55  
56  
57  
58  
59  
60

SDI, the more developed the country.<sup>13</sup>

Estimated average percentage change (EAPC) was used to evaluate the trends in age-standardised rates of prevalence, death, and DALY over a specific period. The natural logarithm of age-standardised rate is assumed to be linear along with time; that is,  $y = \alpha + \beta x + \varepsilon$ , where  $y = \ln(\text{rate})$ ,  $x = \text{calendar year}$ , and  $\varepsilon = \text{error term}$ . Based on this formula,  $\beta$  represents the positive or negative age-standardised rate trends. EAPC was calculated as  $100 \times (\exp(\beta) - 1)$ , and its 95% confidence interval (CI) could also be calculated from this model.<sup>14</sup> The age-standardised indicator was recognized to be in an increasing trend if the 95% CI of the corresponding EAPC estimation  $> 0$ , to be a decreasing trend if the 95% CI  $< 0$ , and to be stable if the 95% CI included 0. All statistical analyses and visualizations were conducted using R statistical software program (version 4.1.0).  $P$  value  $< 0.05$  was considered statistically significant.

Because the study was based on publicly available dataset, this study was exempted by the ethics committee of the Third Xiangya Hospital of Central South University. This study followed the guideline of cross-sectional study described in the Guidelines for Accurate and Transparent Health Estimates Reporting (GATHER).<sup>15</sup>

### **Patient and public involvement**

Patients and/or the public were not involved in the study design, or data interpretation, or manuscript drafting, or dissemination plans of this research.

## **Results**

### **Burden of IBD at global level**

Globally, IBD accounted for 4.90 million (95% UI 4.35 to 5.50) prevalent cases, 0.40 million (0.36 to 0.46) incident cases, and 40998 (34933 to 44661) deaths in 2019 (Supplementary Table 1 and Figure 1A). Meanwhile, 1.62 million (1.36 to 1.92) DALYs, 0.73 million (0.49 to 0.99) YLDs, and 0.90 million (0.78 to 1.00) YLLs were due to IBD in 2019 (Supplementary Table 1, Supplementary Table 2, and Supplementary Figure 1-5).

Between 1990 and 2019, the global age-standardised prevalence rate of IBD decreased from 73.23 (95% UI 63.86 to 83.63) in 1990 to 59.25 (52.78 to 66.47) in

2019 per 100000 population with the EAPC being -0.66 (95% CI -0.75 to -0.57) (Table 1; Figure 1B, 1C; and Figure 2A). The global age-standardised death rate decreased from 0.67 (0.57 to 0.78) in 1990 to 0.54 (0.46 to 0.59) in 2019 per 100000 population by an average of -0.69 (-0.81 to -0.57) (Table 1, Figure 2B, and Supplementary Figure 6-7). The global age-standardised DALY rate decreased from 27.20 (21.70 to 32.39) in 1990 to 20.15 (16.86 to 23.71) in 2019 per 100000 population at -1.04 per year (-1.06 to -1.01) (Table 1, Figure 2C, and Supplementary Figure 8-9). The same decreased trend was found in the age-standardised incidence rate [EAPC = -0.60 (-0.73 to -0.48)], the age-standardised YLL rate [EAPC = -1.33 (-1.37 to -1.30)] and the age-standardised YLD rate [EAPC = -0.62 (-0.70 to -0.53)] (Supplementary Table 3 and Supplementary Figure 10-12).

### **Burden of IBD at GBD regional level**

Western Europe was the top region for largest numbers of both prevalent cases [1.03 million (95% UI 0.93 to 1.13)] and deaths [11981 (9244 to 13315)] in 2019 (Supplementary Table 1). Western Europe was also the region with the highest age-standardised death rate [1.11 (0.87 to 1.23)] in 2019, followed by High-income North America [0.97 (0.79 to 1.05)] and Australasia [0.72 (0.53 to 0.83)] (Figure 3B). The highest age-standardised prevalence rates in 2019 were observed in High-income Asia Pacific [210.54 (183.69 to 239.68)], High-income North America [209.60 (195.48 to 224.46)] and Western Europe [188.22 (169.47 to 207.48)] (Figure 3A). In 2019, Oceania showed the lowest numbers of both prevalent cases [417 (338 to 509)] and deaths [36 (26 to 51)]. And Oceania [3.87 (3.16 to 4.71)] had the lowest age-standardised prevalence rate among regions in 2019. The lowest age-standardised death rate of IBD in 2019 was found in High-income Asia Pacific [0.13 (0.11 to 0.18)] (Table 1). The highest age-standardised DALY rates in 2019 were observed in High-income North America [51.27 (40.90 to 62.35)], Western Europe [46.79 (36.98 to 57.57)], and Central Europe [35.84 (27.66 to 44.67)] (Figure 3C). While Southeast Asia [7.45 (6.06 to 8.76)] had the lowest age-standardised DALY rate.

From 1990 to 2019, an increase in total prevalent cases, deaths and DALYs was seen across most of GBD regions, as shown in Figure 4. However, the trends in

1  
2  
3  
4 age-standardised prevalence rate, age-standardised death rate and age-standardised  
5 DALY rate over the time differed substantially between the GBD regions.  
6 Age-standardised prevalence rate increased in 13 GBD regions and decreased in 5  
7 regions, with the highest increasing trend in East Asia [EAPC = 2.79 (2.41 to 3.18)]  
8 and the largest decrease in High-income North America [EAPC = -1.32 (-1.75 to  
9 -0.89)] (Figure 2A). Age-standardised death rate declined in more than 60% of GBD  
10 regions, such as High-income Asia Pacific [EAPC = -4.29 (-4.64 to -3.93)], East Asia  
11 [EAPC = -3.98 (-4.33 to -3.63)], and Andean Latin America [EAPC = -2.74 (-3.16 to  
12 -2.32)] (Figure 2B). Most of the GBD regions had a decreased trend in  
13 age-standardised DALY rate, with the largest decrease in Andean Latin America  
14 [EAPC = -3.68 (-4.17 to -3.18)], East Asia [EAPC = -2.31 (-2.48 to -2.15)], and  
15 Southeast Asia [EAPC = -2.29 (-2.44 to -2.15)] (Figure 2C). However, Australasia  
16 had the largest increase in age-standardised death rate [EAPC = 1.77 (1.41 to 2.13)]  
17 and age-standardised DALY rate [EAPC = 0.93 (0.75 to 1.12)].

### 31 **Burden of IBD at national and territorial level**

32  
33 At the national and territorial level in 2019, China and United States of America had  
34 the highest number of prevalent cases [911405 (95% UI 776347 to 1069533), 762890  
35 (712357 to 813654), respectively], the highest number of death cases [4676 (3774 to  
36 5461), 5910 (4622 to 6464), respectively], and the highest number of DALYs  
37 [232464 (179903 to 291090), 215289 (175991 to 256059), respectively]  
38 (Supplementary Table 4, Figure 1A, and Supplementary Figure 1-2). In 2019, the  
39 highest age-standardised prevalence rates of IBD were observed in Norway [498.95  
40 (429.41 to 570.55)], Canada [357.73 (323.05 to 393.88)] and Hungary [332.82  
41 (309.79 to 356.72)]; and the lowest age-standardised prevalence rates were found in  
42 Solomon Islands [3.35 (2.73 to 4.12)], Kiribati [3.55 (2.90 to 4.32)] and Papua New  
43 Guinea [3.65 (2.96 to 4.45)] (Supplementary Table 5 and Figure 1B). Netherlands had  
44 the highest age-standardised death rate in 2019 [2.08 (1.58 to 2.40)], and Singapore  
45 had the lowest [0.07 (0.06 to 0.11)] (Supplementary Figure 6).

56  
57  
58 Between 1990 and 2019, age-standardised prevalence rates were found in an  
59 increasing trend in 147 countries or territories (Figure 1C). During the same period,  
60



1  
2  
3  
4 47 and 129 countries or territories experienced a significant increase and decrease in  
5 age-standardised death rate of IBD, respectively, and the highest increase and  
6 decrease was noted in Germany [EAPC = 3.73 (3.26 to 4.20)] and Republic of Korea  
7 [EAPC = -7.96 (-8.67 to -7.25)], respectively (Supplementary Figure 7).  
8 Age-standardised DALY rates of IBD increased in 49 countries or territories, with the  
9 greatest increase in Mauritius [EAPC = 1.88 (1.53 to 2.23)], and decreased in 133  
10 countries or territories, with the highest decrease in Peru [EAPC = -5.08 (-5.69 to  
11 -4.47)] (Supplementary Figure 9).

### 12 **Burden of IBD by age and sex patterns**

13 Overall, the global number of prevalent cases, death cases and DALYs were totally  
14 higher in females than males in 2019 (Supplementary Table 1). The age-standardised  
15 death rate was 0.56 (95% UI 0.45 to 0.62) per 100000 population in males and 0.52  
16 (0.43 to 0.58) per 100000 population in females (Table 1). The age-standardised  
17 DALY rate was 20.6 (17.2 to 24.3) in males and 19.7 (16.2 to 23.5) in females (Table  
18 1). While the age-standardised prevalence rate was similar between males and females  
19 in 2019.

20 The highest peak of IBD age-specific prevalence rate occurred at age 60-64 years  
21 both in females and males in 2019 (Figure 5A). The highest rates of death and  
22 DALYs observed were in the oldest age group ( $\geq 95$  years) for both sexes (Figure 5B,  
23 5C). In 2019, the number of prevalent cases peaked in the 50-54 years age group in  
24 both sexes. The number of deaths was highest in males aged 80-84 years and females  
25 aged 85-89 years, and the number of DALYs was highest in males aged 50-54 years  
26 and females aged 55-59 years. The highest number of YLLs occurred in the group  
27 aged 65-69 years (75234, [95% UI 63865 to 83022]), while the highest number of  
28 YLDs occurred in the group aged 45-49 years (80776, [53187 to 113688])  
29 (Supplementary Figure 13).

30 From 1990 to 2019, the number of prevalent cases, death cases and DALYs  
31 continued to increase in both sexes and were higher in females than males in all years.  
32 The age-standardised prevalence rate, death rate and DALY rate all decreased in both  
33 sexes during the same period (Supplementary Figure 14-16).



### **Burden of IBD by Socio-demographic Index (SDI)**

Higher SDI was associated with higher age-standardised prevalence rates of IBD, with values that were higher than the global rate in high and high-middle SDI quintiles, and lower than the global rate in the other three SDI quintiles (Table 1). High SDI quintile had the highest age-standardised prevalence rate, death rate and DALY rate in 2019. Between 1990 and 2019, age-standardised death rate and age-standardised DALY rate decreased in all SDI quintiles except the high SDI quintile, where it increased [EAPC = 0.82 (0.64 to 1.01)] and remained stable [EAPC = 0.00 (-0.06 to 0.05)], respectively (Table 1 and Figure 2B, 2C). Whereas, age-standardised prevalence rate decreased in high and high-middle SDI quintiles and increased in other three SDI quintiles during the observation period (Table 1 and Figure 2A).

The observed global and regional age-standardised prevalence, death, and DALY rates in relation to SDI are shown in Figure 6, expressed in the annual time series from 1990 to 2019. Regions generally followed the trend of increased death and DALY rates with higher SDI. However, more than 60% of the regions showed an increase trend in age-standardised prevalence rate during this study period. At the global level, the age-standardised prevalence, death, and DALY rates dropped with increasing SDI values but above the expected levels during the past 30 years.

### **Discussion**

In this study, we comprehensively analyzed the temporal trend in IBD burden at the global, regional, and national levels. GBD 2019 reported 4.90 million IBD estimates globally in 2019 and 4.79 million in 2017, while GBD 2017 reported 6.85 million in 2017.<sup>16</sup> The discrepancy could be partly attributed to the improved specificity of case definition since GBD 2019 adjusted administrative data inputs toward expected stringent diagnosis using previously published IBD data with ICD codes.<sup>11</sup> In addition, GBD 2019 improved model fit prevalence and incidence by setting more plausible bounds on excess mortality rate and passing less-informative priors to lower levels of the geographical hierarchy in DisMod-MR 2.1.<sup>11</sup> Indeed, GBD 2019 study

1  
2  
3  
4 provides the most current overview of the burden of IBD. It incorporated more data  
5 sources, with some carried out in regions not previously assessed, providing updated  
6 estimates on IBD global epidemiology.<sup>11</sup> Besides, GBD 2019 updated the bias  
7 adjustment, which further improved the data reliability.<sup>11</sup> After these adjustments, our  
8 study confirmed two epidemiological shifts in IBD since 1990. The number of  
9 prevalent cases increased globally since 1990, with China and United States of  
10 America in the top number of cases. The age-standardised rates of death and DALYs  
11 decreased, implying significant improvements in IBD management. The changing  
12 trend and geographical patterns made implications for policy-makers to prioritise IBD  
13 management, especially in newly industrialised countries.  
14  
15  
16  
17  
18  
19  
20  
21  
22

23 The highest age-standardised prevalence rates were observed in High-income North  
24 America, Western Europe, and High-income Asia Pacific. The pattern was also shown  
25 in the high SDI countries such as Norway and Canada. This is consistent with several  
26 previous meta-analysis,<sup>6,17</sup> and might correlate with several risk factors of IBD.<sup>18,19</sup>  
27 Deeply processed food with low fiber, high fat, and sugar is a risk factor for decreased  
28 microbial species.<sup>20-22</sup> Others include smoking, hygiene, latitude resulting in vitamin  
29 D/sun exposure.<sup>23,24</sup> Though the largest reduction in age-standardised prevalence rate  
30 was also observed in High-income North America, which was consistent with some  
31 of the previous report,<sup>6,25</sup> indicating the shift of the epidemiological stages of IBD in  
32 western countries.<sup>26,27</sup>  
33  
34  
35  
36  
37  
38  
39  
40  
41  
42

43 Despite increasing numbers of prevalent cases, the global age-standardised  
44 prevalence rate showed a decreasing trend. The discrepancy reflects denominator  
45 effects of increasing global population and age-specific effects.<sup>28</sup> Coward S and his  
46 colleagues<sup>29</sup> reported that the prevalence rate in elderly and adults was ten times more  
47 than pediatric in Canada. The trend in age-standardised prevalence rate differed  
48 substantially between the GBD regions. The highest increasing trend was observed in  
49 East Asia. At the national level, China, with a total number of 911405 IBD patients,  
50 was a prominent contribution to the total numbers of global IBD. The pattern is  
51 consistent with several previous report,<sup>6,30</sup> which is related mainly to urbanization,  
52 industrialization, and some area cultural westernization in China.<sup>31</sup> With  
53  
54  
55  
56  
57  
58  
59  
60

1  
2  
3  
4 epidemiological surveillance strategies shifting from paper-record to electronic  
5 healthcare databases using International Classification of Disease (ICD) codes,  
6  
7 advances in health-care facilities like the implementation of endoscopy,<sup>32</sup> detection  
8 and diagnosis of IBD also increased.  
9

10  
11 IBD causes body disability.<sup>33,34</sup> Consistent with the previous study,<sup>4</sup> the  
12 age-standardised DALY and mortality rate showed a decreasing trend globally,  
13 especially in East Asia, likely resulting from the improved treatment strategy such as  
14 early use of biological agents and patient support programs.<sup>35</sup> The introduction of  
15 biological agents improved life quality and reduced surgery rate.<sup>30,36</sup> Unfortunately,  
16 the cost of biologic therapy is considerable, estimated at more than US\$25,000 per  
17 year.<sup>37</sup> More attention should be paid in increasing access to modern therapies in  
18 lower SDI countries.  
19  
20  
21  
22  
23  
24  
25

26  
27 There are some limitations of our study. First, the accuracy of the estimated IBD  
28 burden largely depends on the availability and quality of data acquired, which could  
29 be partially compensated by statistical methods. However, in regions with scarce data,  
30 especially in low-SDI countries, estimates could only rely on predictive covariates or  
31 data from a single country which is less representative. Extra cautions should be made  
32 when interpreting data in these areas. Additional high-quality population-based  
33 studies should be done, especially in countries with scarce data. Second, estimates  
34 discrepancies compared to some of the previously published studies could be further  
35 improved, although GBD 2019 has improved model fit to prevalence and incidence,  
36 partly overcoming the discrepancies. For example, the prevalence rate in Canada was  
37 only 46 to 57 per 100,000 population in GBD 2017. However, around 520 per  
38 100,000 population was reported by a previous large population-based study in  
39 Canada.<sup>38</sup> GBD 2019 reported 357.73 in 100,000 population after adjustment. Third,  
40 UC-specific and CD-specific trends were not assessed due to the lack of relevant data.  
41 The association between IBD and certain risk factors should also be included in the  
42 future. Nevertheless, GBD 2019 provided the most up-to-date estimated IBD global  
43 epidemiology for the last three decades and implications for new hypotheses. It has  
44 covered 204 countries. Therefore, it generates more representative data and can  
45  
46  
47  
48  
49  
50  
51  
52  
53  
54  
55  
56  
57  
58  
59  
60

1  
2  
3  
4 compensate for biases in individual literatures.

## 5 6 **Conclusions**

7  
8 Despite the reduction in age-standardised rate of prevalence, death, and DALY,  
9 IBD will continue to be a major public health burden due to increasing numbers of  
10 prevalent cases globally. However, the trend is shifted substantially since 1990. When  
11 the age-standardised prevalence rate rapidly increases in newly industrialized  
12 countries especially in east Asia, the incidence has been stabilized or even decreased  
13 in western countries like high-income north America. The prevalence of IBD in newly  
14 industrialized countries is quickly approaching western countries. More systematic  
15 epidemiologic monitoring strategies, especially in low-SDI countries and risk factors  
16 integrated into the estimate model of the GBD Study would further facilitate IBD  
17 management. Our findings might help some policymakers to justify medical resources  
18 allocation, especially in low SDI countries.  
19  
20  
21  
22  
23  
24  
25  
26  
27  
28  
29

## 30 31 **Abbreviations**

32 EAPC, estimated annual percentage change; IBD, inflammatory bowel disease; SDI,  
33 socio-demographic index; GBD, Global Burden of Disease, Injuries, and Risk Factors  
34 Study; DALYs, disability adjusted life years; YLDs, years of life lived with disability;  
35 YLLs, years of life lost; IHME, Institute for Health Metrics and Evaluation;  
36 GATHER, Guidelines for Accurate and Transparent Health Estimates Reporting;  
37 ASR, age-standardised rate; UI, uncertainty interval; CI, confidence interval.  
38  
39  
40  
41  
42  
43  
44  
45

## 46 47 **Ethics approval and consent to participate**

48 This study did not involve human participants and the study did not need ethics  
49 approval because it used publicly available data.  
50  
51

## 52 53 **Consent for publication**

54 Not applicable.  
55  
56  
57

## 58 59 **Availability of supporting data**

60

1  
2  
3  
4 The data were obtained through an online query tool from the website of IHME  
5 (<http://ghdx.healthdata.org/>).  
6  
7  
8

### 9 **Declaration of interests**

10 The authors declare no conflict of interests.  
11  
12  
13

### 14 **Funding**

15 This work was supported by the National Science Foundation of China (Grant No.  
16 82000527) and Changsha Municipal Natural Science Foundation (Grant No.  
17 kq2014266).  
18  
19  
20  
21  
22  
23  
24

### 25 **Author Contributions**

26 Study concept and design: Decai Zhang and Rui Wang. Acquisition of data: Zhaoqi Li  
27 and Shaojun Liu. Data analysis and interpretation: Rui Wang RW, Zhaoqi Li, Shaojun  
28 Liu, and Decai Zhang. Drafting the manuscript: Decai Zhang and Rui Wang. Critical  
29 revision of manuscript: all authors. All authors had full access to all the data in the  
30 study and had final responsibility for the decisions to submit for publication.  
31  
32  
33  
34  
35  
36  
37  
38

### 39 **Acknowledgements**

40 We would like to thank all members of the Institute for Health Metrics and Evaluation  
41 (IHME), and Bill & Melinda Gates Foundation which support the related GBD 2019  
42 studies.  
43  
44  
45  
46  
47  
48

### 49 **Authors' information**

50 <sup>1</sup>Department of Gastroenterology, The Third Xiangya Hospital of Central South  
51 University, Changsha 410013, Hunan Province, China. <sup>2</sup>Hunan Key Laboratory of  
52 Nonresolving Inflammation and Cancer, Changsha 410013, Hunan Province, China.  
53  
54  
55  
56  
57  
58

### 59 **References**

1. Seyed Tabib NS, Madgwick M, Sudhakar P, Verstockt B, Korcsmaros T, Vermeire S. Big data in IBD: big progress for clinical practice. *Gut*. 2020;69(8):1520-1532.
2. Magro F, Gionchetti P, Eliakim R, et al. Third European Evidence-based Consensus on Diagnosis and Management of Ulcerative Colitis. Part 1: Definitions, Diagnosis, Extra-intestinal Manifestations, Pregnancy, Cancer Surveillance, Surgery, and Ileo-anal Pouch Disorders. *J Crohns Colitis*. 2017;11(6):649-670.
3. Agrawal M, Spencer EA, Colombel JF, Ungaro RC. Approach to the Management of Recently Diagnosed Inflammatory Bowel Disease Patients: A User's Guide for Adult and Pediatric Gastroenterologists. *Gastroenterology*. 2021;161(1):47-65.
4. Piovani D, Danese S, Peyrin-Biroulet L, Bonovas S. Inflammatory bowel disease: estimates from the global burden of disease 2017 study. *Aliment Pharmacol Ther*. 2020;51(2):261-270.
5. Guan Q. A Comprehensive Review and Update on the Pathogenesis of Inflammatory Bowel Disease. *J Immunol Res*. 2019;2019:7247238.
6. Ng SC, Shi HY, Hamidi N, et al. Worldwide incidence and prevalence of inflammatory bowel disease in the 21st century: a systematic review of population-based studies. *Lancet*. 2017;390(10114):2769-2778.
7. Khalili H. The Changing Epidemiology of Inflammatory Bowel Disease: What Goes Up May Come Down. *Inflamm Bowel Dis*. 2020;26(4):591-592.
8. Collaborators GBDD. Global age-sex-specific fertility, mortality, healthy life expectancy (HALE), and population estimates in 204 countries and territories, 1950-2019: a comprehensive demographic analysis for the Global Burden of Disease Study 2019. *Lancet*. 2020;396(10258):1160-1203.
9. Diseases GBD, Injuries C. Global burden of 369 diseases and injuries in 204 countries and territories, 1990-2019: a systematic analysis for the Global Burden of Disease Study 2019. *Lancet*. 2020;396(10258):1204-1222.
10. Collaborators GBDUHC. Measuring universal health coverage based on an index of effective coverage of health services in 204 countries and territories, 1990-2019: a systematic analysis for the Global Burden of Disease Study 2019. *Lancet*. 2020;396(10258):1250-1284.
11. Collaborators GBDRF. Global burden of 87 risk factors in 204 countries and territories, 1990-2019: a systematic analysis for the Global Burden of Disease Study 2019. *Lancet*. 2020;396(10258):1223-1249.
12. Collaborators GBDM. Global, regional, and national under-5 mortality, adult mortality, age-specific mortality, and life expectancy, 1970-2016: a systematic analysis for the Global Burden of Disease Study 2016. *Lancet*. 2017;390(10100):1084-1150.
13. Alcohol GBD, Drug Use C. The global burden of disease attributable to alcohol and drug use in 195 countries and territories, 1990-2016: a systematic analysis for the Global Burden of Disease Study 2016. *Lancet Psychiatry*. 2018;5(12):987-1012.
14. Deng Y, Zhao P, Zhou L, et al. Epidemiological trends of tracheal, bronchus, and lung cancer at the global, regional, and national levels: a population-based study. *J Hematol Oncol*. 2020;13(1):98.
15. Stevens GA, Alkema L, Black RE, et al. Guidelines for Accurate and Transparent Health Estimates Reporting: the GATHER statement. *Lancet*. 2016;388(10062):e19-e23.
16. Collaborators GBDIBD. The global, regional, and national burden of inflammatory bowel disease in 195 countries and territories, 1990-2017: a systematic analysis for the Global



- Burden of Disease Study 2017. *Lancet Gastroenterol Hepatol*. 2020;5(1):17-30.
17. Ye Y, Manne S, Treem WR, Bennett D. Prevalence of Inflammatory Bowel Disease in Pediatric and Adult Populations: Recent Estimates From Large National Databases in the United States, 2007-2016. *Inflamm Bowel Dis*. 2020;26(4):619-625.
18. de Souza HSP, Fiocchi C, Iliopoulos D. The IBD interactome: an integrated view of aetiology, pathogenesis and therapy. *Nat Rev Gastroenterol Hepatol*. 2017;14(12):739-749.
19. Ng SC, Tsoi KK, Kamm MA, et al. Genetics of inflammatory bowel disease in Asia: systematic review and meta-analysis. *Inflamm Bowel Dis*. 2012;18(6):1164-1176.
20. Ananthkrishnan AN, Khalili H, Konijeti GG, et al. A prospective study of long-term intake of dietary fiber and risk of Crohn's disease and ulcerative colitis. *Gastroenterology*. 2013;145(5):970-977.
21. Suez J, Korem T, Zeevi D, et al. Artificial sweeteners induce glucose intolerance by altering the gut microbiota. *Nature*. 2014;514(7521):181-186.
22. Ananthkrishnan AN. Environmental risk factors for inflammatory bowel diseases: a review. *Dig Dis Sci*. 2015;60(2):290-298.
23. Kaplan GG, Ng SC. Understanding and Preventing the Global Increase of Inflammatory Bowel Disease. *Gastroenterology*. 2017;152(2):313-321 e312.
24. Piovani D, Danese S, Peyrin-Biroulet L, Bonovas S. Environmental, Nutritional, and Socioeconomic Determinants of IBD Incidence: A Global Ecological Study. *J Crohns Colitis*. 2020;14(3):323-331.
25. Zhao M, Gonczi L, Lakatos PL, Burisch J. The Burden of Inflammatory Bowel Disease in Europe in 2020. *J Crohns Colitis*. 2021;15(9):1573-1587.
26. Kaplan GG, Windsor JW. The four epidemiological stages in the global evolution of inflammatory bowel disease. *Nat Rev Gastroenterol Hepatol*. 2021;18(1):56-66.
27. Kaplan GG. The global burden of IBD: from 2015 to 2025. *Nat Rev Gastroenterol Hepatol*. 2015;12(12):720-727.
28. Collaborators GBDM. Global, regional, and national age-sex-specific mortality and life expectancy, 1950-2017: a systematic analysis for the Global Burden of Disease Study 2017. *Lancet*. 2018;392(10159):1684-1735.
29. Coward S, Clement F, Benchimol EI, et al. Past and Future Burden of Inflammatory Bowel Diseases Based on Modeling of Population-Based Data. *Gastroenterology*. 2019;156(5):1345-1353 e1344.
30. Qiu Y, Ren W, Liu Y, Chen WE, Pan XH, Ren JJ. Disease burden of inflammatory bowel disease in China from 1990 to 2017: Findings from the global burden of diseases 2017. *EClinicalMedicine*. 2020;27:100544.
31. Su HJ, Chiu YT, Chiu CT, et al. Inflammatory bowel disease and its treatment in 2018: Global and Taiwanese status updates. *J Formos Med Assoc*. 2019;118(7):1083-1092.
32. Pavlovic-Calic N, Salkic NN, Gegic A, Smajic M, Alibegovic E. Crohn's disease in Tuzla region of Bosnia and Herzegovina: a 12-year study (1995-2006). *Int J Colorectal Dis*. 2008;23(10):957-964.
33. Shafer LA, Sofia MA, Rubin DT, et al. An International Multicenter Comparison of IBD-Related Disability and Validation of the IBDDI. *Clin Gastroenterol Hepatol*. 2021;19(12):2524-2531.
34. Marinelli C, Zingone F, Inferrera M, et al. Factors associated with disability in patients with

- 1  
2  
3  
4  
5  
6  
7  
8  
9  
10  
11  
12  
13  
14  
15  
16  
17  
18  
19  
20
- ulcerative colitis: A cross-sectional study. *J Dig Dis*. 2020;21(2):81-87.
35. Jones JL, Nguyen GC, Benchimol EI, et al. The Impact of Inflammatory Bowel Disease in Canada 2018: Quality of Life. *J Can Assoc Gastroenterol*. 2019;2(Suppl 1):S42-S48.
36. Frolkis AD, Lipton DS, Fiest KM, et al. Cumulative incidence of second intestinal resection in Crohn's disease: a systematic review and meta-analysis of population-based studies. *Am J Gastroenterol*. 2014;109(11):1739-1748.
37. Marchetti M, Liberato NL. Biological therapies in Crohn's disease: are they cost-effective? A critical appraisal of model-based analyses. *Expert Rev Pharmacoecon Outcomes Res*. 2014;14(6):815-824.
38. Benchimol EI, Manuel DG, Guttmann A, et al. Changing age demographics of inflammatory bowel disease in Ontario, Canada: a population-based cohort study of epidemiology trends. *Inflamm Bowel Dis*. 2014;20(10):1761-1769.

### Figure legends

21  
22  
23  
24  
25  
26  
27  
28  
29

**Figure 1.** The global prevalence burden of IBD in 204 countries and territories. (A) The absolute number of IBD prevalent cases in 2017. (B) The age-standardised prevalence rate (per 100 000 population) of IBD in 2017. (C) The EAPC of age-standardised prevalence rate for IBD between 1990 and 2019. EAPC=estimated annual percentage change. IBD=inflammatory bowel disease.

30  
31  
32  
33  
34  
35  
36  
37  
38

**Figure 2.** The EAPCs in age-standardised rates of prevalence (A), deaths (B), and DALYs (C) due to IBD from 1990 to 2019, both sexes, by GBD region, and by SDI quintile. DALYs=disability adjusted life years. EAPC=estimated annual percentage change. GBD=Global Burden of Disease. IBD=inflammatory bowel disease. SDI=Socio-demographic Index.

39  
40  
41  
42  
43  
44

**Figure 3.** The age-standardised rates of prevalence (A), deaths (B), and DALYs (C) due to IBD by sex, across 21 regions, in 2019. Error bars indicate the 95% uncertainty interval (UI) for the age-standardised rates. DALYs=disability adjusted life years. IBD=inflammatory bowel disease.

45  
46  
47  
48  
49  
50

**Figure 4.** The absolute number of prevalent cases (A), deaths (B), and DALYs (C) due to IBD for all GBD regions from 1990 to 2019. DALYs=disability adjusted life years. GBD=Global Burden of Disease. IBD=inflammatory bowel disease.

51  
52  
53  
54  
55  
56  
57  
58  
59  
60

**Figure 5.** Age patterns by sex of the total number and age-standardised rates of prevalent cases (A), deaths (B), and DALYs (C) due to IBD at the global level in 2019. Error bars indicate the 95% uncertainty interval (UI) for the number of cases. Shading indicates the 95% UI for the rates. DALYs=disability adjusted life years. IBD=inflammatory bowel disease.



1  
2  
3 **Figure 6.** The age-standardised rates of IBD prevalence (A), deaths (B), and DALYs  
4 globally and for 21 GBD regions by SDI from 1990 to 2019.

5  
6 The expected age-standardised rates in 2019 based solely on SDI were represented by  
7 the black line. For each region, points from left to right depict estimates from each  
8 year from 1990 to 2019. DALYs=disability adjusted life years. GBD=Global Burden  
9 of Disease. IBD=inflammatory bowel disease. SDI=Socio-demographic Index.  
10  
11  
12  
13  
14  
15  
16  
17  
18  
19  
20  
21  
22  
23  
24  
25  
26  
27  
28  
29  
30  
31  
32  
33  
34  
35  
36  
37  
38  
39  
40  
41  
42  
43  
44  
45  
46  
47  
48  
49  
50  
51  
52  
53  
54  
55  
56  
57  
58  
59  
60

**Table 1** Age-standardised prevalence, death and DALY rates for inflammatory bowel disease (IBD) in 1990 and 2019 and their temporal trends from 1990 to 2019

| Characteristics       | Age-standardised prevalence rate |                           |                        | Age-standardized death rate |                     |                        | Age-standardized DALY rate |                        |                        |
|-----------------------|----------------------------------|---------------------------|------------------------|-----------------------------|---------------------|------------------------|----------------------------|------------------------|------------------------|
|                       | per 100,000 population           |                           |                        | per 100,000 population      |                     |                        | per 100,000 population     |                        |                        |
|                       | 1990 No.<br>(95%UI)              | 2019 No.<br>(95%UI)       | EAPC No.<br>(95%CI)    | 1990 No.<br>(95%UI)         | 2019 No.<br>(95%UI) | EAPC No.<br>(95%CI)    | 1990 No.<br>(95%UI)        | 2019 No.<br>(95%UI)    | EAPC No.<br>(95%CI)    |
| Global                | 73.23 (63.86 to 83.63)           | 59.25 (52.78 to 66.47)    | -0.66 (-0.75 to -0.57) | 0.67 (0.57 to 0.78)         | 0.54 (0.46 to 0.59) | -0.69 (-0.81 to -0.57) | 27.20 (21.70 to 32.39)     | 20.15 (16.86 to 23.71) | -1.04 (-1.01 to -1.01) |
| Sex                   |                                  |                           |                        |                             |                     |                        |                            |                        |                        |
| Male                  | 71.52 (62.12 to 81.89)           | 59.30 (52.60 to 66.91)    | -0.56 (-0.64 to -0.49) | 0.69 (0.56 to 0.88)         | 0.56 (0.45 to 0.62) | -0.78 (-0.83 to -0.72) | 27.40 (21.78 to 33.22)     | 20.64 (17.16 to 24.31) | -0.99 (-1.01 to -0.97) |
| Female                | 75.01 (65.67 to 85.45)           | 59.33 (52.89 to 66.18)    | -0.74 (-0.85 to -0.64) | 0.63 (0.50 to 0.74)         | 0.52 (0.43 to 0.58) | -0.64 (-0.80 to -0.47) | 27.09 (20.30 to 32.42)     | 19.70 (16.16 to 23.49) | -1.09 (-1.12 to -1.06) |
| SDI quintile          |                                  |                           |                        |                             |                     |                        |                            |                        |                        |
| High                  | 200.83 (176.43 to 226.92)        | 183.14 (166.58 to 201.17) | -0.34 (-0.43 to -0.24) | 0.72 (0.65 to 0.85)         | 0.84 (0.69 to 0.92) | 0.82 (0.64 to 1.01)    | 43.95 (34.13 to 55.06)     | 42.93 (33.66 to 53.08) | 0.00 (-0.06 to 0.05)   |
| High-middle           | 82.41 (71.42 to 95.06)           | 73.85 (65.38 to 83.09)    | -0.32 (-0.47 to -0.18) | 0.52 (0.46 to 0.60)         | 0.38 (0.34 to 0.43) | -1.17 (-1.32 to -1.02) | 25.92 (21.34 to 30.93)     | 19.34 (15.59 to 23.73) | -1.12 (-1.17 to -1.07) |
| Middle                | 22.50 (19.00 to 26.62)           | 30.57 (25.70 to 36.01)    | 1.25 (1.04 to 1.47)    | 0.57 (0.40 to 0.74)         | 0.31 (0.26 to 0.34) | -2.44 (-2.59 to -2.29) | 18.11 (14.29 to 21.72)     | 11.61 (9.70 to 13.71)  | -1.63 (-1.68 to -1.58) |
| Low-middle            | 19.02 (15.75 to 22.93)           | 20.94 (17.41 to 25.11)    | 0.52 (0.40 to 0.64)    | 0.74 (0.47 to 1.06)         | 0.48 (0.38 to 0.58) | -1.75 (-1.90 to -1.60) | 23.29 (16.18 to 30.53)     | 15.37 (12.47 to 18.32) | -1.58 (-1.65 to -1.51) |
| Low                   | 12.40 (10.21 to 15.06)           | 12.85 (10.64 to 15.81)    | 0.29 (0.19 to 0.39)    | 0.67 (0.48 to 0.99)         | 0.55 (0.43 to 0.70) | -0.80 (-0.86 to -0.74) | 22.19 (14.49 to 29.80)     | 17.19 (13.57 to 21.70) | -0.94 (-0.99 to -0.89) |
| IBD region            |                                  |                           |                        |                             |                     |                        |                            |                        |                        |
| Andean Latin America  | 16.55 (14.08 to 19.39)           | 17.09 (14.60 to 19.88)    | 0.06 (0.03 to 0.10)    | 0.54 (0.36 to 0.71)         | 0.26 (0.20 to 0.32) | -2.74 (-3.16 to -2.32) | 26.36 (15.78 to 38.96)     | 9.83 (7.75 to 12.19)   | -3.68 (-4.17 to -3.18) |
| Australasia           | 108.86 (92.21 to 126.63)         | 156.30 (137.65 to 177.07) | 0.83 (0.61 to 1.05)    | 0.54 (0.47 to 0.64)         | 0.72 (0.53 to 0.83) | 1.77 (1.41 to 2.13)    | 26.19 (20.48 to 32.91)     | 34.98 (26.87 to 44.64) | 0.93 (0.75 to 1.12)    |
| Caribbean             | 27.93 (23.96 to 32.85)           | 26.31 (22.13 to 31.28)    | -0.05 (-0.13 to 0.03)  | 0.56 (0.44 to 0.69)         | 0.42 (0.31 to 0.53) | -1.24 (-1.41 to -1.08) | 23.38 (16.68 to 34.05)     | 18.21 (13.08 to 24.76) | -0.91 (-1.06 to -0.76) |
| Central Asia          | 76.86 (64.98 to 91.56)           | 78.72 (66.39 to 93.40)    | 0.09 (0.05 to 0.12)    | 0.39 (0.30 to 0.46)         | 0.32 (0.28 to 0.37) | -1.00 (-1.12 to -0.89) | 26.11 (21.03 to 31.71)     | 22.26 (18.04 to 27.31) | -0.70 (-0.76 to -0.65) |
| Central Europe        | 208.99 (179.90 to 243.75)        | 160.49 (145.58 to 176.95) | -1.25 (-1.64 to -0.87) | 0.46 (0.43 to 0.52)         | 0.47 (0.40 to 0.55) | 0.30 (0.17 to 0.44)    | 46.28 (36.16 to 57.91)     | 35.84 (27.66 to 44.67) | -1.08 (-1.37 to -0.78) |
| Central Latin America | 37.84 (32.42 to 44.16)           | 32.59 (27.93 to 38.07)    | -0.49 (-0.58 to -0.41) | 0.32 (0.28 to 0.35)         | 0.37 (0.30 to 0.43) | 0.98 (0.68 to 1.28)    | 14.84 (12.69 to 17.31)     | 14.68 (12.25 to 17.41) | 0.32 (0.08 to 0.56)    |
| Central Sub-Saharan   | 8.22 (6.76 to 10.11)             | 8.21 (6.80 to 10.11)      | -0.14 (-0.33 to 0.06)  | 0.72 (0.51 to 1.03)         | 0.60 (0.45 to 0.83) | -0.69 (-0.77 to -0.60) | 22.26 (14.75 to 32.74)     | 17.77 (12.98 to 24.27) | -0.79 (-0.88 to -0.70) |

|    |                |                           |                           |                        |                     |                     |                        |                        |                        |                        |
|----|----------------|---------------------------|---------------------------|------------------------|---------------------|---------------------|------------------------|------------------------|------------------------|------------------------|
| 1  |                |                           |                           |                        |                     |                     |                        |                        |                        |                        |
| 2  |                |                           |                           |                        |                     |                     |                        |                        |                        |                        |
| 3  | Africa         |                           |                           |                        |                     |                     |                        |                        |                        |                        |
| 4  |                |                           |                           |                        |                     |                     |                        |                        |                        |                        |
| 5  | East Asia      | 22.51 (18.72 to 26.72)    | 46.22 (39.36 to 53.98)    | 2.79 (2.41 to 3.18)    | 0.86 (0.59 to 1.14) | 0.31 (0.25 to 0.35) | -3.98 (-4.33 to -3.63) | 24.23 (17.74 to 29.83) | 13.08 (10.31 to 16.19) | -2.31 (-2.48 to -2.15) |
| 6  |                |                           |                           |                        |                     |                     |                        |                        |                        |                        |
| 7  |                |                           |                           |                        |                     |                     |                        |                        |                        |                        |
| 8  | Eastern Europe | 88.07 (75.40 to 103.25)   | 82.82 (70.77 to 96.45)    | 0.01 (-0.11 to 0.14)   | 0.49 (0.38 to 0.56) | 0.51 (0.43 to 0.58) | -0.25 (-0.53 to 0.04)  | 27.68 (21.86 to 33.71) | 26.67 (21.96 to 32.46) | -0.30 (-0.45 to -0.14) |
| 9  |                |                           |                           |                        |                     |                     |                        |                        |                        |                        |
| 10 | Eastern        |                           |                           |                        |                     |                     |                        |                        |                        |                        |
| 11 | Sub-Saharan    | 6.27 (5.25 to 7.68)       | 7.21 (6.01 to 8.82)       | 0.46 (0.42 to 0.50)    | 0.72 (0.52 to 1.01) | 0.69 (0.50 to 0.93) | -0.12 (-0.20 to -0.05) | 22.58 (16.13 to 33.35) | 19.44 (14.69 to 25.63) | -0.46 (-0.54 to -0.39) |
| 12 | Africa         |                           |                           |                        |                     |                     |                        |                        |                        |                        |
| 13 |                |                           |                           |                        |                     |                     |                        |                        |                        |                        |
| 14 | High-income    | 126.18 (105.73 to 149.32) | 210.54 (183.69 to 239.68) | 1.04 (0.68 to 1.41)    | 0.40 (0.24 to 0.47) | 0.13 (0.11 to 0.18) | -4.29 (-4.64 to -3.93) | 26.43 (19.87 to 33.86) | 34.55 (23.75 to 46.76) | 0.35 (0.11 to 0.60)    |
| 15 | Asia Pacific   |                           |                           |                        |                     |                     |                        |                        |                        |                        |
| 16 |                |                           |                           |                        |                     |                     |                        |                        |                        |                        |
| 17 |                |                           |                           |                        |                     |                     |                        |                        |                        |                        |
| 18 | High-income    | 346.93 (303.63 to 392.66) | 209.60 (195.48 to 224.46) | -1.32 (-1.75 to -0.89) | 0.68 (0.61 to 0.83) | 0.97 (0.79 to 1.05) | 1.43 (1.15 to 1.72)    | 65.62 (48.61 to 84.95) | 51.27 (40.90 to 62.35) | -0.46 (-0.72 to -0.20) |
| 19 | North America  |                           |                           |                        |                     |                     |                        |                        |                        |                        |
| 20 |                |                           |                           |                        |                     |                     |                        |                        |                        |                        |
| 21 | North Africa   |                           |                           |                        |                     |                     |                        |                        |                        |                        |
| 22 |                |                           |                           |                        |                     |                     |                        |                        |                        |                        |
| 23 | and Middle     | 36.27 (31.06 to 41.91)    | 48.26 (40.98 to 56.94)    | 0.97 (0.84 to 1.10)    | 0.34 (0.24 to 0.49) | 0.26 (0.22 to 0.30) | -0.86 (-0.93 to -0.80) | 14.36 (10.79 to 18.73) | 13.26 (10.60 to 16.47) | -0.30 (-0.34 to -0.25) |
| 24 | East           |                           |                           |                        |                     |                     |                        |                        |                        |                        |
| 25 |                |                           |                           |                        |                     |                     |                        |                        |                        |                        |
| 26 | Oceania        | 4.34 (3.51 to 5.20)       | 3.87 (3.16 to 4.71)       | -0.54 (-0.72 to -0.35) | 0.63 (0.42 to 0.86) | 0.44 (0.33 to 0.60) | -1.41 (-1.50 to -1.32) | 20.60 (13.34 to 28.78) | 14.93 (10.45 to 21.01) | -1.29 (-1.38 to -1.20) |
| 27 |                |                           |                           |                        |                     |                     |                        |                        |                        |                        |
| 28 |                |                           |                           |                        |                     |                     |                        |                        |                        |                        |
| 29 | South Asia     | 19.68 (15.98 to 24.40)    | 20.11 (16.38 to 24.81)    | 0.26 (0.10 to 0.42)    | 0.69 (0.47 to 1.06) | 0.44 (0.33 to 0.57) | -1.91 (-2.07 to -1.74) | 21.48 (14.77 to 29.47) | 14.00 (10.70 to 17.52) | -1.68 (-1.78 to -1.58) |
| 30 |                |                           |                           |                        |                     |                     |                        |                        |                        |                        |
| 31 | Southeast Asia | 4.40 (3.55 to 5.35)       | 6.69 (5.52 to 8.04)       | 1.58 (1.27 to 1.90)    | 0.50 (0.27 to 0.66) | 0.28 (0.21 to 0.33) | -2.36 (-2.52 to -2.19) | 13.16 (8.47 to 15.9)   | 7.45 (6.06 to 8.76)    | -2.29 (-2.44 to -2.15) |
| 32 |                |                           |                           |                        |                     |                     |                        |                        |                        |                        |
| 33 | Southern Latin | 19.22 (15.96 to 22.60)    | 20.53 (17.36 to 24.24)    | 0.28 (0.08 to 0.49)    | 0.31 (0.27 to 0.34) | 0.28 (0.25 to 0.34) | -0.46 (-0.62 to -0.30) | 11.10 (9.69 to 12.66)  | 10.06 (8.61 to 11.94)  | -0.40 (-0.50 to -0.31) |
| 34 | America        |                           |                           |                        |                     |                     |                        |                        |                        |                        |
| 35 |                |                           |                           |                        |                     |                     |                        |                        |                        |                        |
| 36 | Southern       |                           |                           |                        |                     |                     |                        |                        |                        |                        |
| 37 | Sub-Saharan    | 10.44 (8.67 to 12.74)     | 11.78 (9.83 to 14.31)     | 0.53 (0.45 to 0.61)    | 0.42 (0.33 to 0.53) | 0.44 (0.36 to 0.51) | 0.25 (-0.16 to 0.65)   | 15.11 (10.88 to 18.87) | 13.66 (11.37 to 15.90) | -0.12 (-0.44 to 0.20)  |
| 38 | Africa         |                           |                           |                        |                     |                     |                        |                        |                        |                        |
| 39 |                |                           |                           |                        |                     |                     |                        |                        |                        |                        |
| 40 | Tropical Latin | 65.14 (57.26 to 74.08)    | 47.34 (41.21 to 54.02)    | -0.87 (-1.08 to -0.65) | 0.47 (0.41 to 0.51) | 0.44 (0.40 to 0.51) | 0.03 (-0.14 to 0.21)   | 23.37 (19.94 to 27.30) | 19.26 (16.53 to 22.44) | -0.44 (-0.61 to -0.26) |
| 41 | America        |                           |                           |                        |                     |                     |                        |                        |                        |                        |
| 42 |                |                           |                           |                        |                     |                     |                        |                        |                        |                        |
| 43 |                |                           |                           |                        |                     |                     |                        |                        |                        |                        |
| 44 | Western Europe | 156.46 (139.89 to 173.69) | 188.22 (169.47 to 207.48) | 0.37 (0.26 to 0.48)    | 0.82 (0.73 to 1.04) | 1.11 (0.87 to 1.23) | 1.51 (1.27 to 1.75)    | 39.24 (31.18 to 48.16) | 46.79 (36.98 to 57.57) | 0.59 (0.49 to 0.69)    |
| 45 |                |                           |                           |                        |                     |                     |                        |                        |                        |                        |
| 46 | Western        |                           |                           |                        |                     |                     |                        |                        |                        |                        |
| 47 | Sub-Saharan    | 8.49 (7.03 to 10.33)      | 10.09 (8.38 to 12.23)     | 0.78 (0.66 to 0.90)    | 0.56 (0.33 to 0.91) | 0.5 (0.35 to 0.67)  | -0.37 (-0.46 to -0.28) | 19.69 (11.64 to 30.47) | 16.77 (11.61 to 22.73) | -0.57 (-0.66 to -0.48) |
| 48 | Africa         |                           |                           |                        |                     |                     |                        |                        |                        |                        |
| 49 |                |                           |                           |                        |                     |                     |                        |                        |                        |                        |

Abbreviations: CI, confidence interval; DALY, disability adjusted life year; EAPC, estimated annual percentage change; GBD, Global Burden of Disease; SDI, Socio-demographic Index; UI, uncertainty interval.

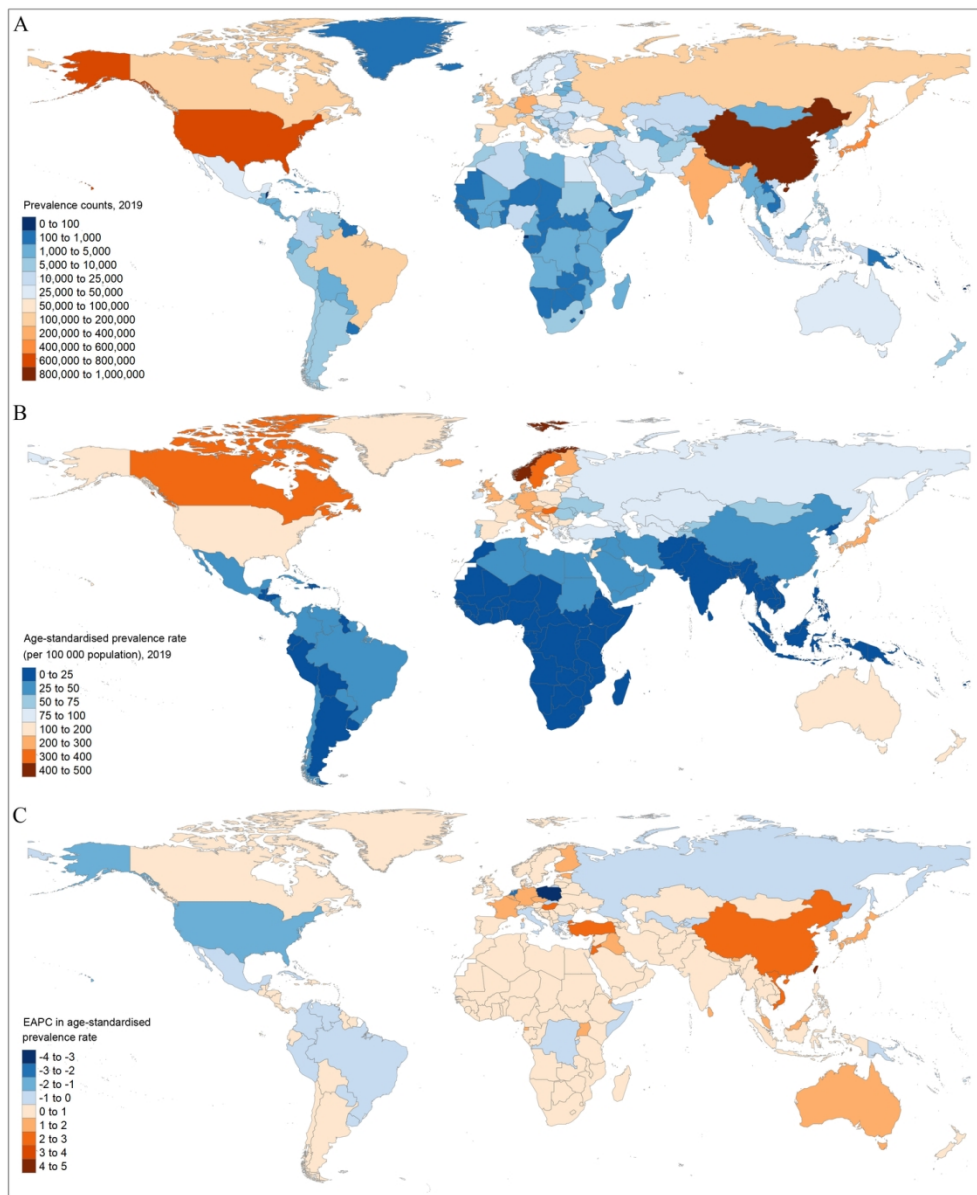

Figure 1. The global prevalence burden of IBD in 204 countries and territories. (A) The absolute number of IBD prevalent cases in 2017. (B) The age-standardised prevalence rate (per 100 000 population) of IBD in 2017. (C) The EAPC of age-standardised prevalence rate for IBD between 1990 and 2019. EAPC=estimated annual percentage change. IBD=inflammatory bowel disease.

128x156mm (300 x 300 DPI)

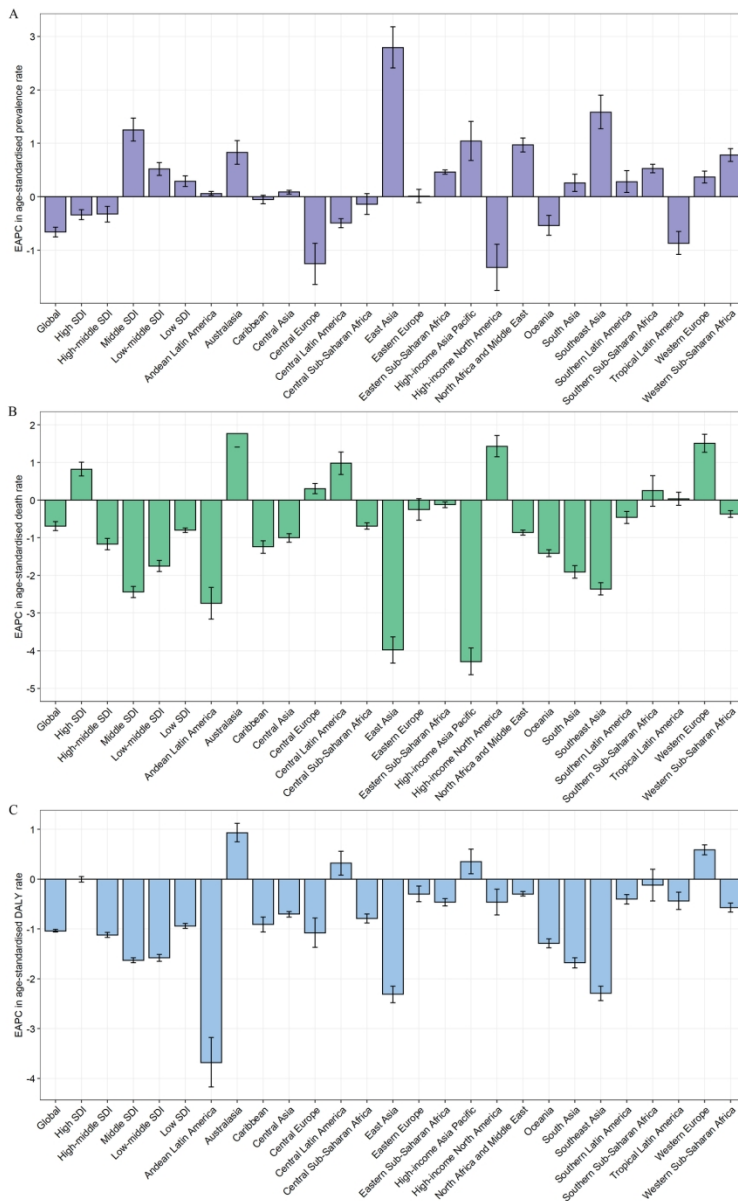

Figure 2. The EAPCs in age-standardised rates of prevalence (A), deaths (B), and DALYs (C) due to IBD from 1990 to 2019, both sexes, by GBD region, and by SDI quintile. DALYs=disability adjusted life years. EAPC=estimated annual percentage change. GBD=Global Burden of Disease. IBD=inflammatory bowel disease. SDI=Socio-demographic Index.

134x214mm (300 x 300 DPI)

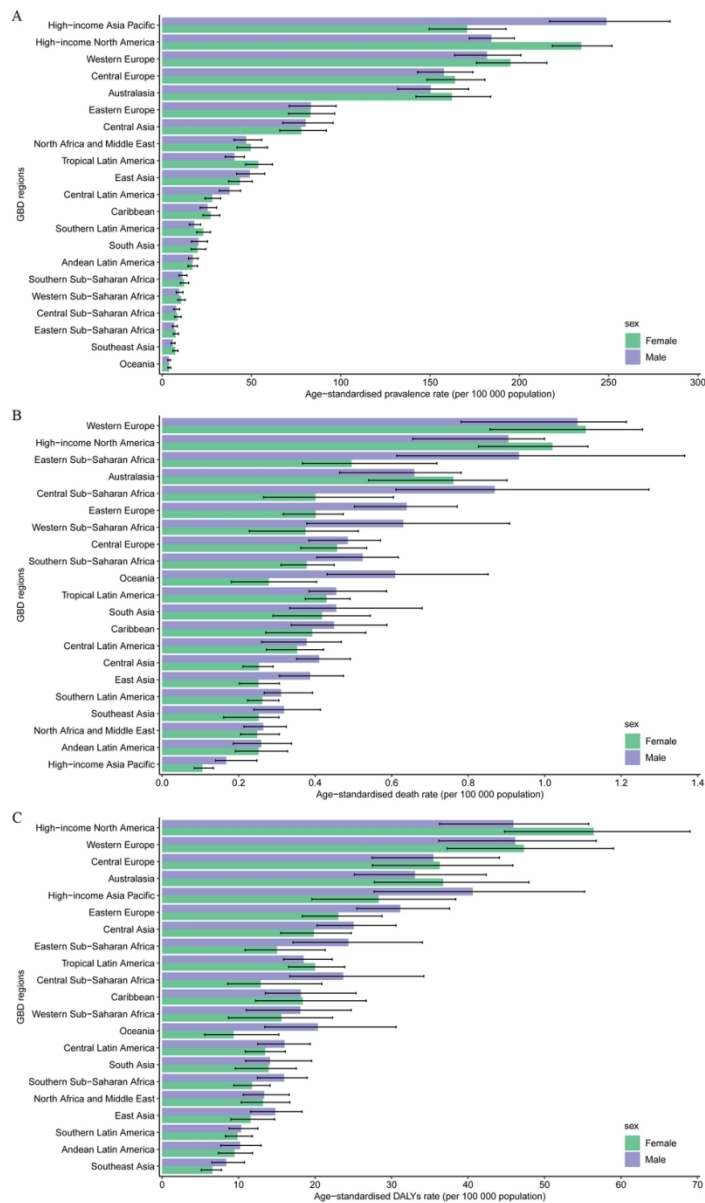

Figure 3. The age-standardised rates of prevalence (A), deaths (B), and DALYs (C) due to IBD by sex, across 21 regions, in 2019. Error bars indicate the 95% uncertainty interval (UI) for the age-standardised rates. DALYs=disability adjusted life years. IBD=inflammatory bowel disease.

82x140mm (300 x 300 DPI)

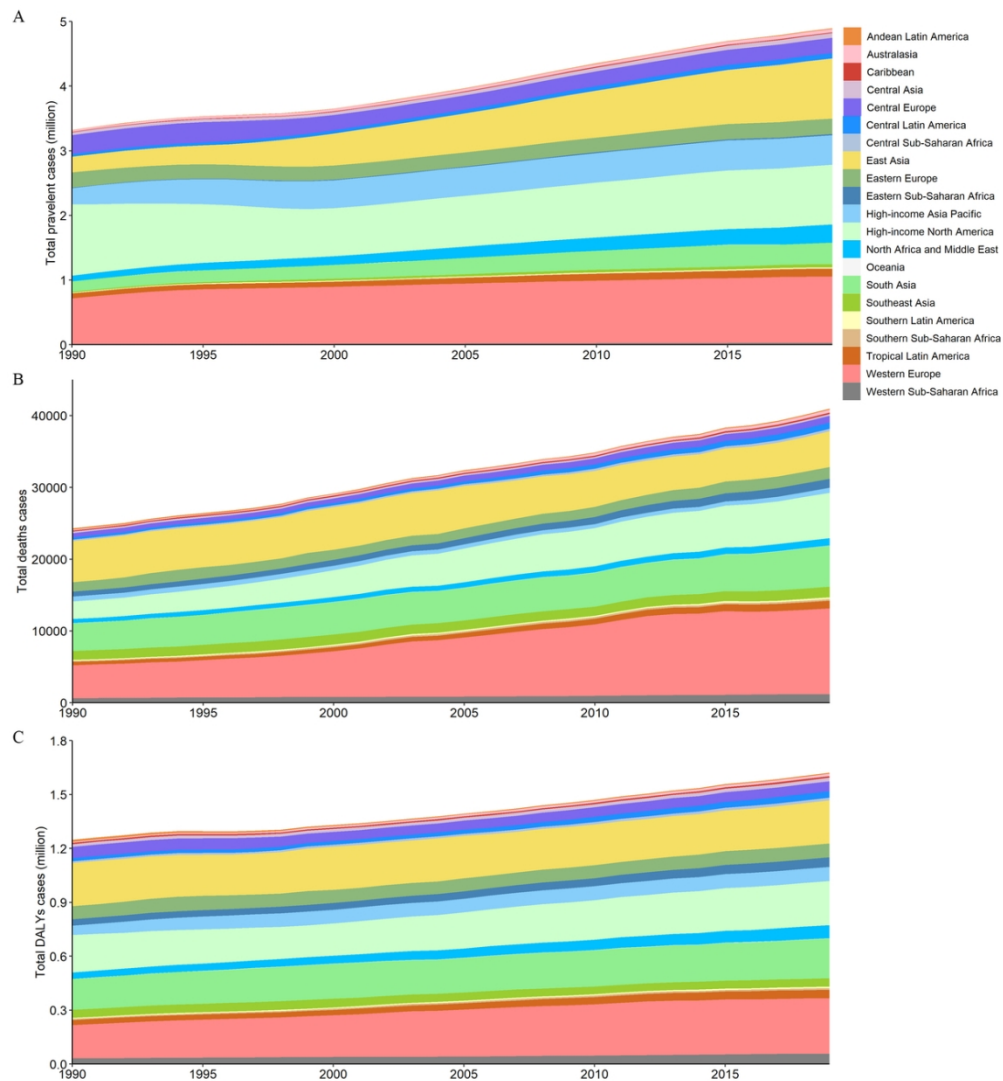

Figure 4. The absolute number of prevalent cases (A), deaths (B), and DALYs (C) due to IBD for all GBD regions from 1990 to 2019.

DALYs=disability adjusted life years. GBD=Global Burden of Disease. IBD=inflammatory bowel disease.

104x113mm (300 x 300 DPI)



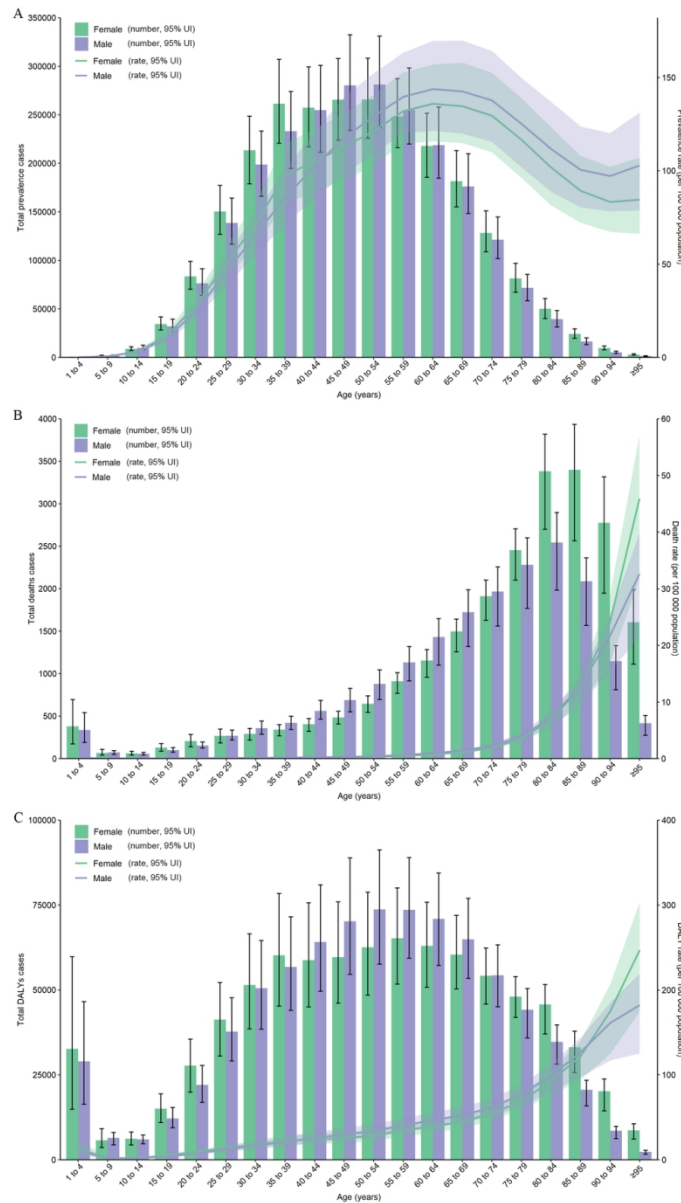

Figure 5. Age patterns by sex of the total number and age-standardised rates of prevalent cases (A), deaths (B), and DALYs (C) due to IBD at the global level in 2019. Error bars indicate the 95% uncertainty interval (UI) for the number of cases. Shading indicates the 95% UI for the rates. DALYs=disability adjusted life years. IBD=inflammatory bowel disease.

84x148mm (300 x 300 DPI)



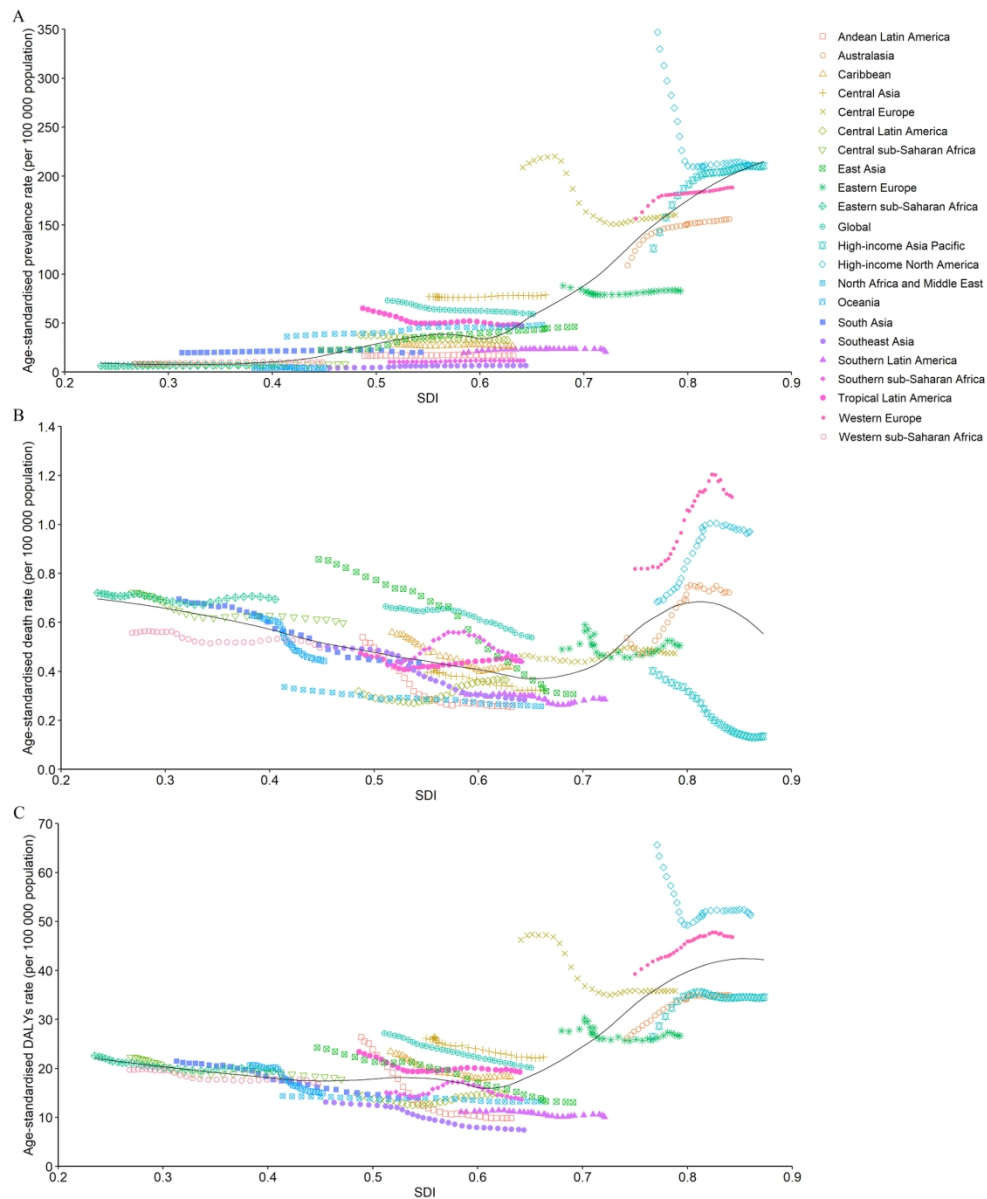

Figure 6. The age-standardised rates of IBD prevalence (A), deaths (B), and DALYs globally and for 21 GBD regions by SDI from 1990 to 2019.

The expected age-standardised rates in 2019 based solely on SDI were represented by the black line. For each region, points from left to right depict estimates from each year from 1990 to 2019. DALYs=disability adjusted life years. GBD=Global Burden of Disease. IBD=inflammatory bowel disease. SDI=Socio-demographic Index.

159x194mm (300 x 300 DPI)

1  
2  
3 Supplement to: **The global, regional and national burden of inflammatory bowel**  
4 **disease in 204 countries and territories from 1990 to 2019, based on Global**  
5 **Burden Disease Study 2019**  
6  
7

8 **Contents:**  
9

10 **Supplementary Figures**  
11

12  
13  
14 Supplementary Figure 1: The absolute number of deaths due to IBD for 204 countries  
15 and territories in 2019.  
16

17  
18 Supplementary Figure 2: The absolute number of DALYs due to IBD for 204  
19 countries and territories in 2019.  
20

21  
22 Supplementary Figure 3: The absolute number of incident cases due to IBD for 204  
23 countries and territories in 2019.  
24

25  
26 Supplementary Figure 4: The absolute number of YLLs due to IBD for 204 countries  
27 and territories in 2019.  
28

29  
30 Supplementary Figure 5: The absolute number of YLDs due to IBD for 204 countries  
31 and territories in 2019.  
32

33  
34 Supplementary Figure 6: The age-standardised death rate (per 100 000 population) of  
35 IBD for 204 countries and territories in 2019.  
36

37  
38 Supplementary Figure 7: The EAPC of age-standardised death rate for IBD in 204  
39 countries and territories between 1990 and 2019.  
40

41  
42 Supplementary Figure 8: The age-standardised DALY rate (per 100 000 population)  
43 of IBD for 204 countries and territories in 2019.  
44

45  
46 Supplementary Figure 9: The EAPC of age-standardised DALY rate for IBD in 204  
47 countries and territories between 1990 and 2019.  
48

49  
50 Supplementary Figure 10: The EAPC of age-standardised incidence rate for IBD in  
51 204 countries and territories between 1990 and 2019.  
52

53  
54 Supplementary Figure 11: The EAPC of age-standardised YLL rate for IBD in 204  
55 countries and territories between 1990 and 2019.  
56

57  
58 Supplementary Figure 12: The EAPC of age-standardised YLD rate for IBD in 204  
59 countries and territories between 1990 and 2019.  
60

1  
2  
3 Supplementary Figure 13: Global counts and age-specific rates of YLLs and YLDs  
4 due to IBD across age group in 2019.  
5  
6

7 Supplementary Figure 14: Trends from 1990 to 2019 in number and age-standardised  
8 prevalence rate of IBD at the global level.  
9

10  
11 Supplementary Figure 15: Trends from 1990 to 2019 in number and age-standardised  
12 death rate of IBD at the global level.  
13

14  
15 Supplementary Figure 16: Trends from 1990 to 2019 in number and age-standardised  
16 DALY rate of IBD at the global level.  
17

### 18 **Supplementary Tables**

19  
20  
21 Supplementary Table 1: Prevalent cases, deaths and disability adjusted life years  
22 (DALYs) of inflammatory bowel disease (IBD) in 1990 and 2019 and their  
23 percentage change from 1990 to 2019  
24

25  
26  
27 Supplementary Table 2: Incident cases, YLLs and YLDs of inflammatory bowel  
28 disease (IBD) in 1990 and 2019 and their percentage change from 1990 to 2019.  
29

30  
31 Supplementary Table 3: Age-standardised incidence, YLL and YLD rates for  
32 inflammatory bowel disease (IBD) in 1990 and 2019 and their temporal trends from  
33 1990 to 2019.  
34

35  
36  
37 Supplementary Table 4: Prevalent cases, deaths and disability adjusted life years  
38 (DALYs) for inflammatory bowel disease (IBD) by 204 countries or territories in  
39 2019 and 2019, and their percentage change from 1990 to 2019.  
40

41  
42 Supplementary Table 5: Age-standardised prevalence, death and DALY rates for  
43 inflammatory bowel disease (IBD) by 204 countries or territories in 1990 and 2019,  
44 and their temporal trends from 1990 to 2019.  
45  
46  
47  
48  
49  
50  
51  
52  
53  
54  
55  
56  
57  
58  
59  
60

1  
2  
3 **Supplementary Figure 1.** The absolute number of deaths due to IBD for 204  
4 countries and territories in 2019.  
5

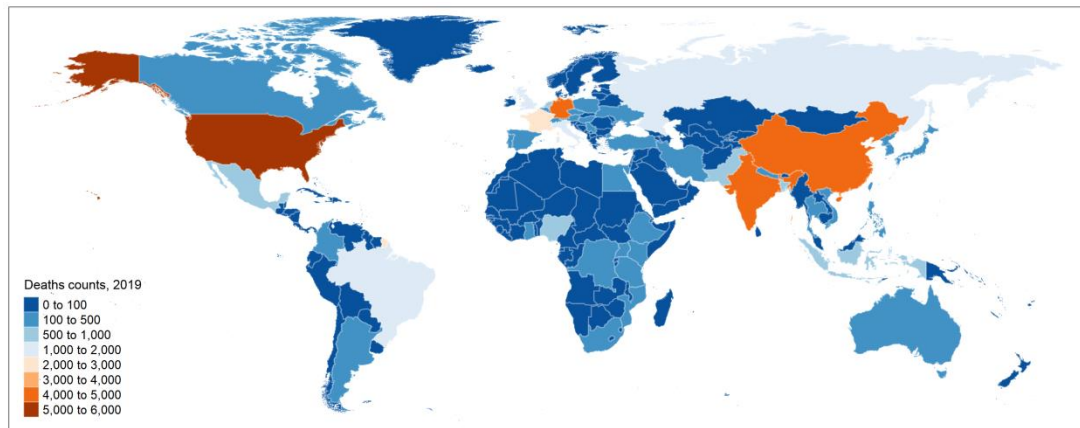

20 IBD, inflammatory bowel disease.

21  
22  
23 **Supplementary Figure 2.** The absolute number of DALYs due to IBD for 204  
24 countries and territories in 2019.  
25

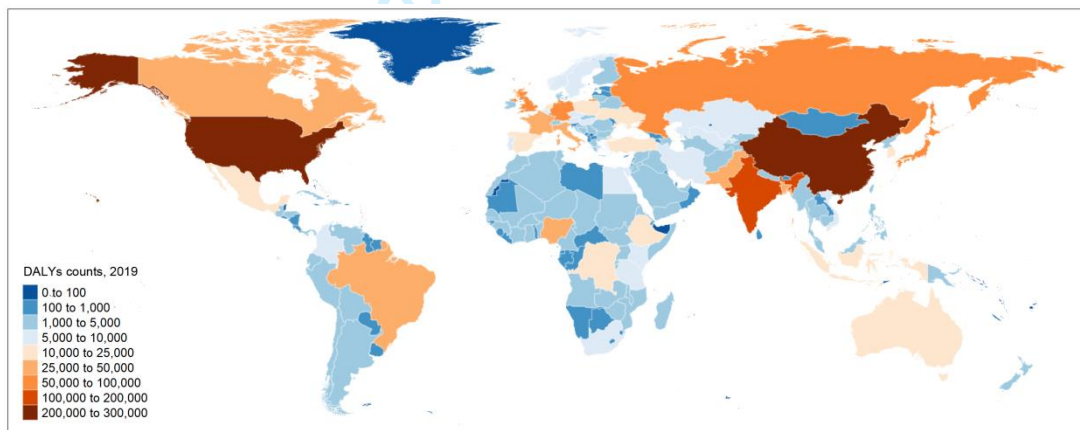

39 DALYs, disability adjusted life years; IBD, inflammatory bowel disease.

40  
41  
42 **Supplementary Figure 3.** The absolute number of incident cases due to IBD for 204  
43 countries and territories in 2019.  
44

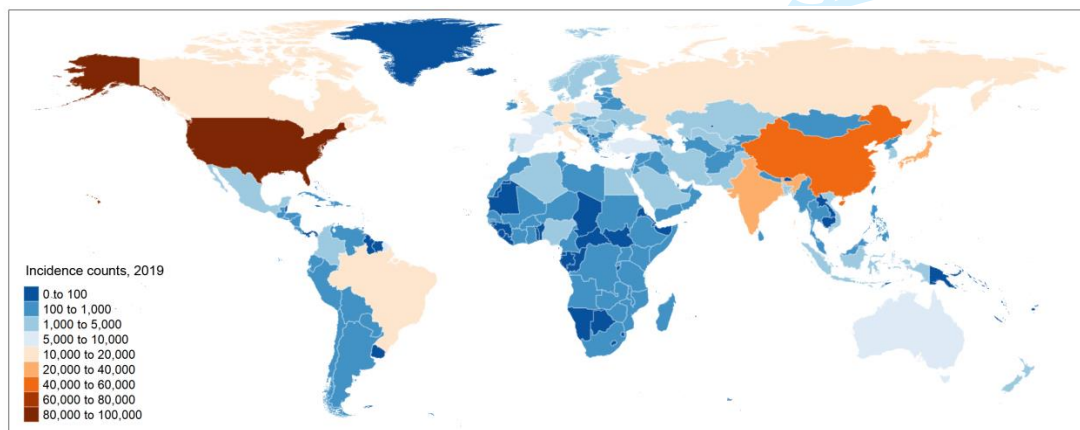

59 IBD, inflammatory bowel disease.  
60

**Supplementary Figure 4.** The absolute number of YLLs due to IBD for 204 countries and territories in 2019.

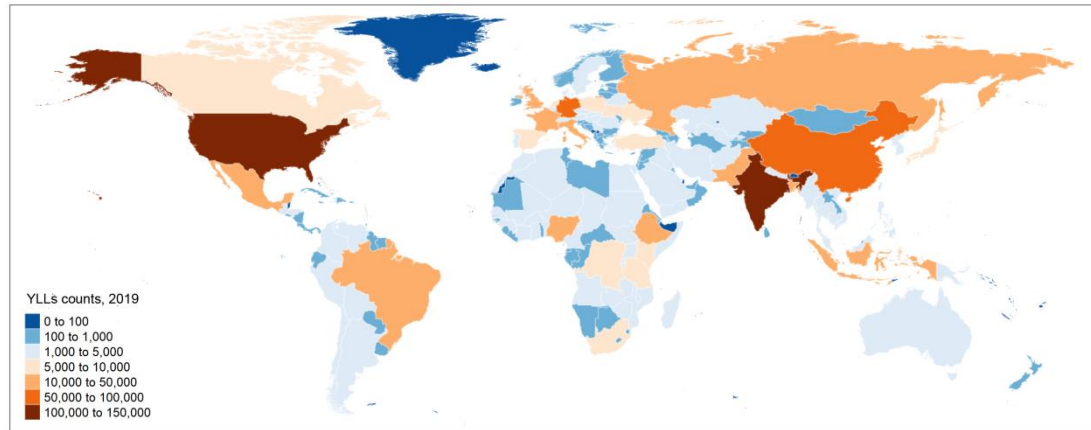

IBD, inflammatory bowel disease; YLLs, years of life lost.

**Supplementary Figure 5.** The absolute number of YLDs due to IBD for 204 countries and territories in 2019.

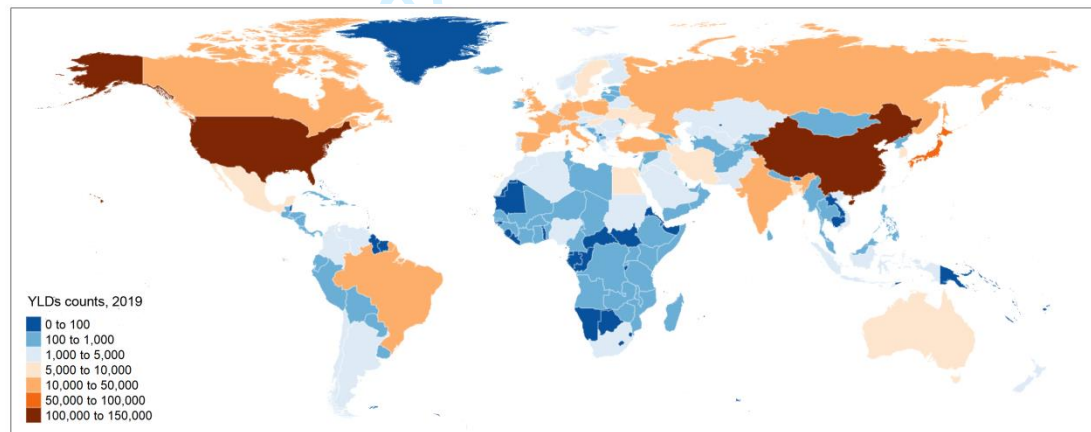

IBD, inflammatory bowel disease; YLDs, years of life lived with disability.

**Supplementary Figure 6.** The age-standardised death rate (per 100 000 population) of IBD for 204 countries and territories in 2019.

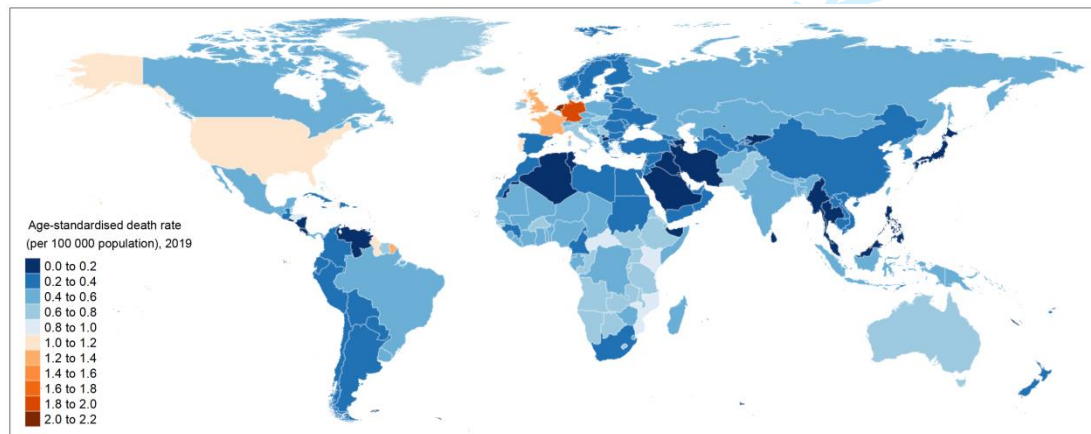

IBD, inflammatory bowel disease.



1  
2  
3 **Supplementary Figure 7.** The EAPC of age-standardised death rate for IBD in 204  
4 countries and territories between 1990 and 2019.  
5

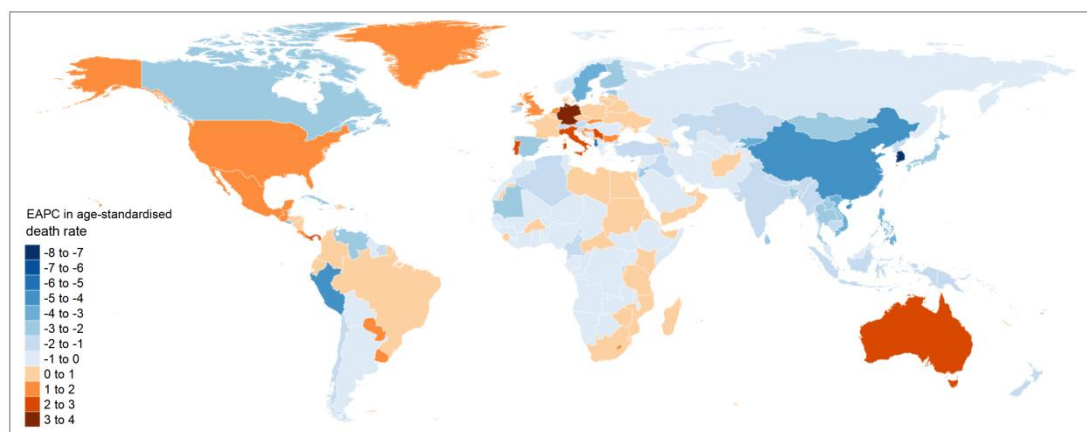

20 EAPC, estimated annual percentage change; IBD, inflammatory bowel disease.

21  
22  
23 **Supplementary Figure 8.** The age-standardised DALY rate (per 100 000 population)  
24 of IBD for 204 countries and territories in 2019.  
25

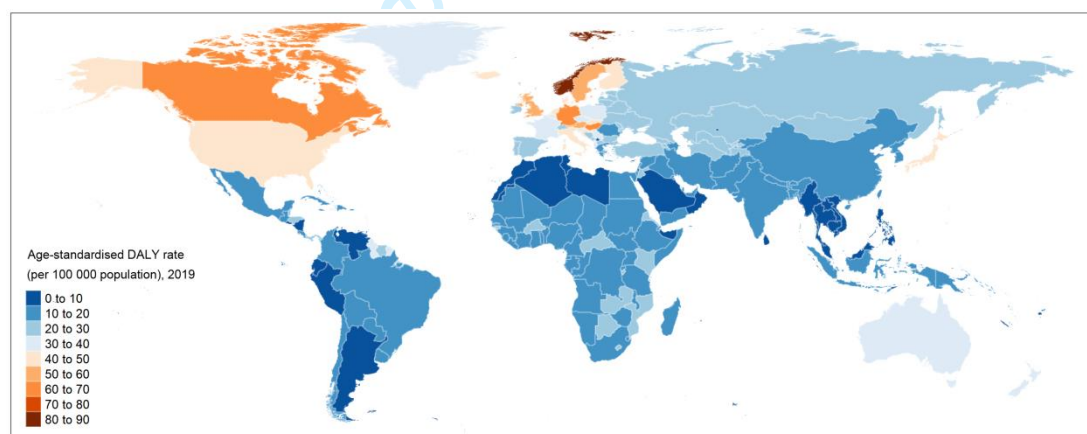

40 DALY, disability adjusted life year; IBD, inflammatory bowel disease.

41  
42  
43 **Supplementary Figure 9.** The EAPC of age-standardised DALY rate for IBD in 204  
44 countries and territories between 1990 and 2019.  
45

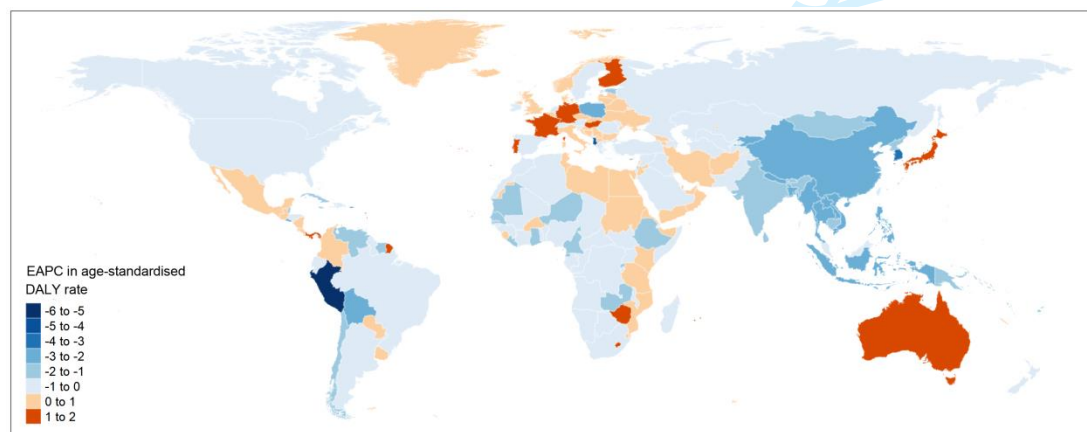

DALY, disability adjusted life year; EAPC, estimated annual percentage change; IBD,

1  
2  
3  
4  
5  
6  
7  
8  
9  
10  
11  
12  
13  
14  
15  
16  
17  
18  
19  
20  
21  
22  
23  
24  
25  
26  
27  
28  
29  
30  
31  
32  
33  
34  
35  
36  
37  
38  
39  
40  
41  
42  
43  
44  
45  
46  
47  
48  
49  
50  
51  
52  
53  
54  
55  
56  
57  
58  
59  
60

inflammatory bowel disease.

**Supplementary Figure 10.** The EAPC of age-standardised incidence rate for IBD in 204 countries and territories between 1990 and 2019.

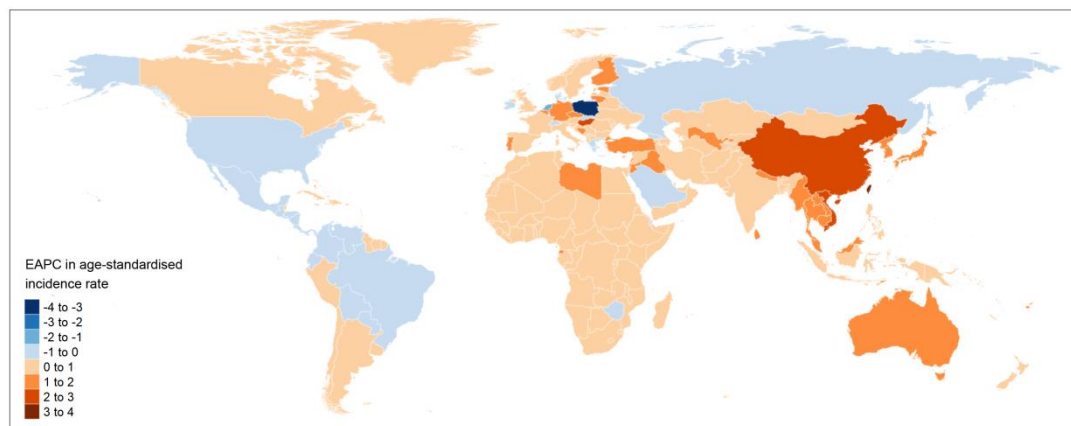

EAPC, estimated annual percentage change; IBD, inflammatory bowel disease.

**Supplementary Figure 11.** The EAPC of age-standardised YLL rate for IBD in 204 countries and territories between 1990 and 2019.

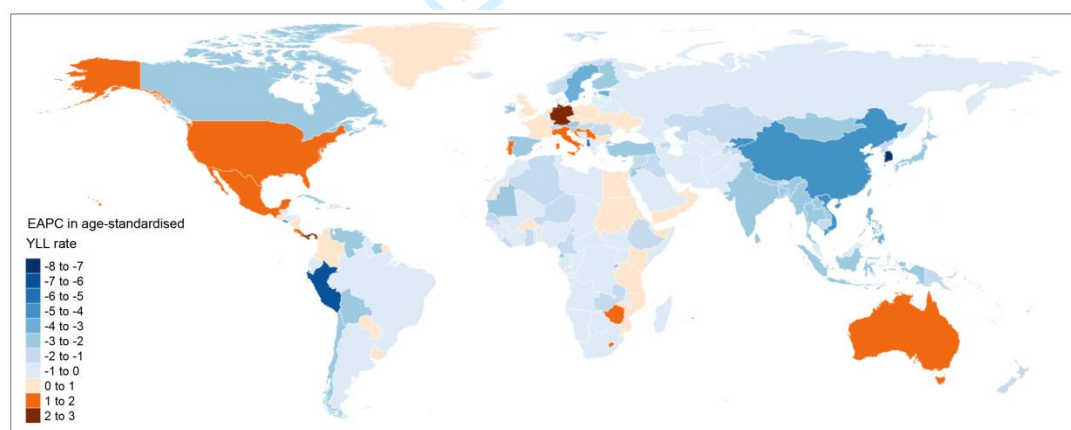

EAPC, estimated annual percentage change; IBD, inflammatory bowel disease; YLL, years of life lost.

**Supplementary Figure 12.** The EAPC of age-standardised YLD rate for IBD in 204 countries and territories between 1990 and 2019.

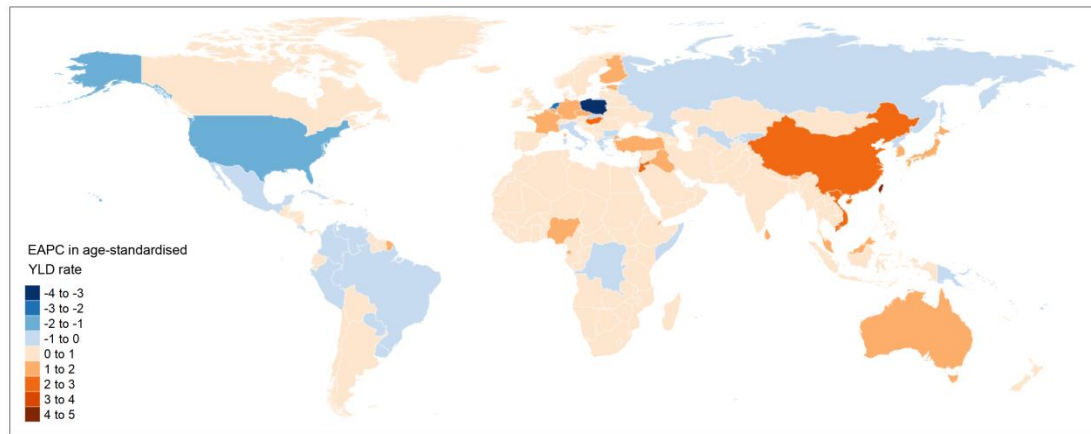

EAPC, estimated annual percentage change; IBD, inflammatory bowel disease; YLD, years of life lived with disability.

**Supplementary Figure 13.** Global counts and age-specific rates of YLLs and YLDs due to IBD across age group in 2019.

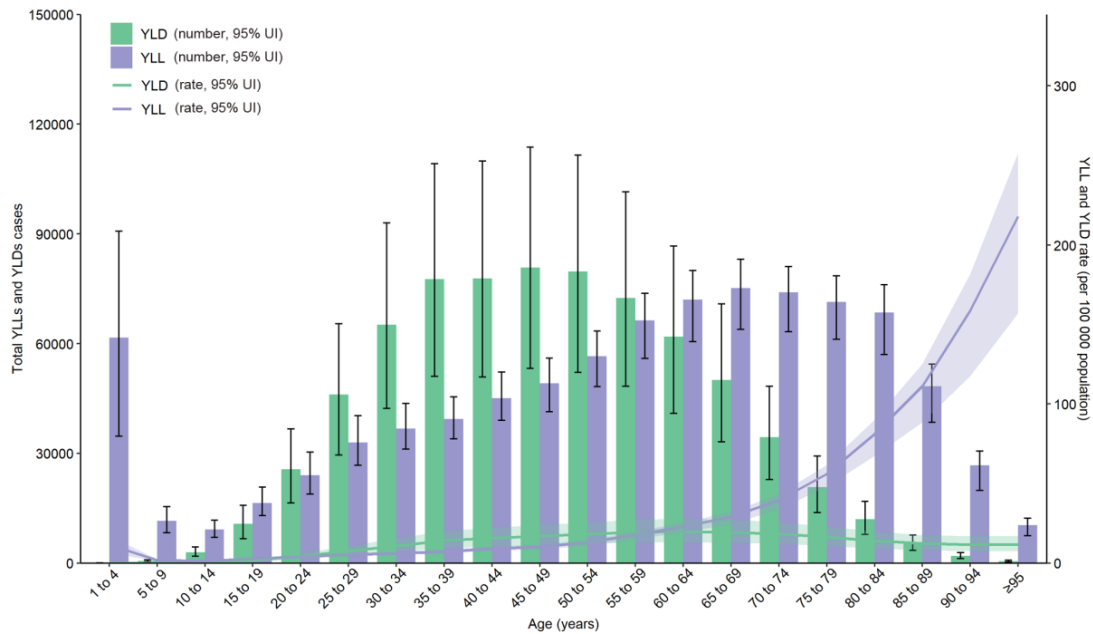

Error bars indicate the 95% uncertainty interval (UI) for YLLs and YLDs. Shading indicates the 95% UI for the rates. IBD, inflammatory bowel disease; YLDs, years of life lived with disability; YLLs, years of life lost.

**Supplementary Figure 14.** Trends from 1990 to 2019 in number and age-standardised prevalence rate of IBD at the global level.



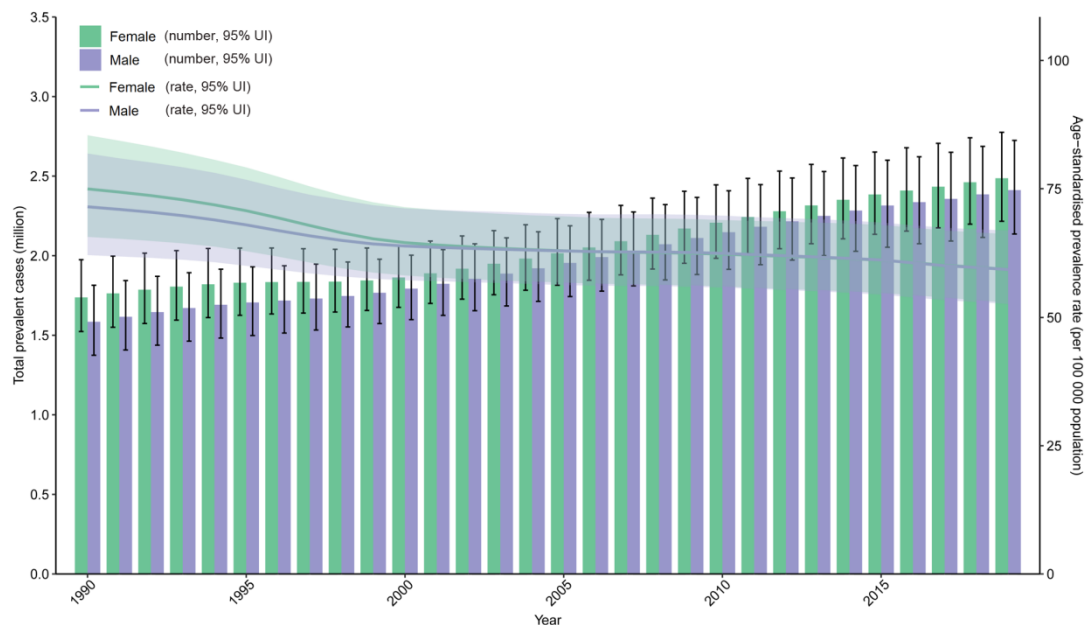

Error bars indicate the 95% uncertainty interval (UI) for number of prevalent cases. Shading indicates the 95% UI for the age-standardised prevalence rate. IBD, inflammatory bowel disease.

**Supplementary Figure 15.** Trends from 1990 to 2019 in number and age-standardised death rate of IBD at the global level.

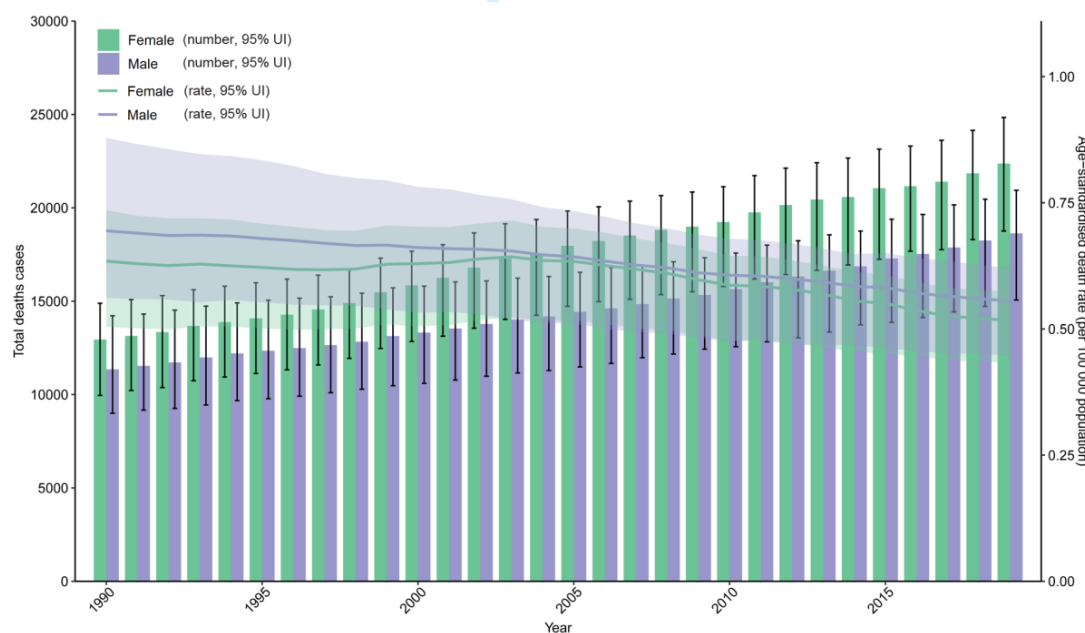

Error bars indicate the 95% uncertainty interval (UI) for number of death cases. Shading indicates the 95% UI for the age-standardised death rate. IBD, inflammatory bowel disease.

**Supplementary Figure 16.** Trends from 1990 to 2019 in number and age-standardised DALY rate of IBD at the global level.

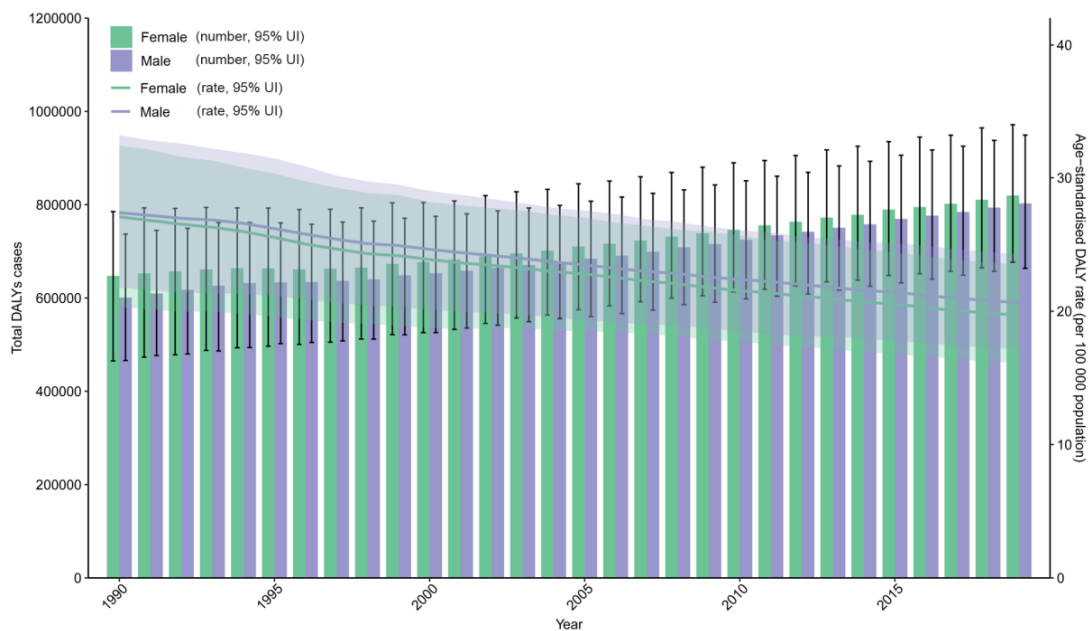

Error bars indicate the 95% uncertainty interval (UI) for number of DALYs cases. Shading indicates the 95% UI for the age-standardised DALY rate. DALY, disability adjusted life year; IBD, inflammatory bowel disease.

**Supplementary Table 1** Prevalent cases, deaths and disability adjusted life years (DALYs) of inflammatory bowel disease (IBD) in 1990 and 2019 and their percentage change from 1990 to 2019

| Characteristics         | Prevalent cases                       |                                    |                                     | Deaths                       |                              |                                     | DALYs                             |                                    |                                     |
|-------------------------|---------------------------------------|------------------------------------|-------------------------------------|------------------------------|------------------------------|-------------------------------------|-----------------------------------|------------------------------------|-------------------------------------|
|                         | 1990 No.<br>(95%UI)                   | 2019 No.<br>(95%UI)                | Percentage<br>change (%)<br>(95%UI) | 1990 No.<br>(95%UI)          | 2019 No.<br>(95%UI)          | Percentage<br>change (%)<br>(95%UI) | 1990 No.<br>(95%UI)               | 2019 No.<br>(95%UI)                | Percentage<br>change (%)<br>(95%UI) |
| Global                  | 3322132<br>(2903627<br>to<br>3790430) | 4898558<br>(4353233 to<br>5499296) | 47.45 (43.76<br>to 51.43)           | 24295<br>(20258 to<br>28376) | 40998<br>(34933 to<br>44661) | 68.75 (47.12<br>to 94.62)           | 1248275<br>(963014 to<br>1503174) | 1622498<br>(1356296 to<br>1915042) | 29.98 (14.83<br>to 50.21)           |
| Sex                     |                                       |                                    |                                     |                              |                              |                                     |                                   |                                    |                                     |
| Male                    | 1584462<br>(1374414<br>to<br>1814399) | 2411840<br>(2136219 to<br>2724369) | 52.22 (48.47<br>to 56.34)           | 11347 (9002<br>to 14218)     | 18633<br>(15060 to<br>20938) | 64.21 (37.52<br>to 90.74)           | 600963<br>(466033 to<br>736983)   | 802748<br>(663563 to<br>949342)    | 33.58 (15.75<br>to 53.92)           |
| Female                  | 1737670<br>(1523309<br>to<br>1974864) | 2486718<br>(2216240 to<br>2775262) | 43.11 (39.03<br>to 47.31)           | 12947<br>(9953 to<br>14888)  | 22365<br>(18759 to<br>24838) | 72.74 (47.65<br>to 115.99)          | 647311<br>(465166 to<br>785221)   | 819751<br>(676700 to<br>971584)    | 26.64 (10.70<br>to 54.99)           |
| SDI quintile            |                                       |                                    |                                     |                              |                              |                                     |                                   |                                    |                                     |
| High                    | 1883348<br>(1654416<br>to<br>2128434) | 2283717<br>(2079286 to<br>2493360) | 21.26 (15.68<br>to 27.38)           | 7386 (6656<br>to 8731)       | 17801<br>(14215 to<br>19552) | 141.02<br>(73.28 to<br>161.46)      | 415485<br>(323781 to<br>520634)   | 603330<br>(489511 to<br>729627)    | 45.21 (26.78<br>to 56.21)           |
| High-middle             | 942961<br>(817123 to<br>1086707)      | 1362491<br>(1206918 to<br>1538822) | 44.49 (40.70<br>to 48.74)           | 5045 (4476<br>to 5782)       | 7272 (6519<br>to 8110)       | 44.13 (24.31<br>to 65.11)           | 288336<br>(236216 to<br>344578)   | 352794<br>(285252 to<br>432623)    | 22.36 (12.11<br>to 32.44)           |
| Middle                  | 301457<br>(252149 to<br>355140)       | 818871<br>(688348 to<br>968484)    | 171.64<br>(163.13 to<br>181.21)     | 5425 (4146<br>to 6768)       | 6598 (5602<br>to 7341)       | 21.61 (-2.11<br>to 58.92)           | 248139<br>(184995 to<br>297495)   | 291088<br>(240412 to<br>345833)    | 17.31 (-3.67<br>to 60.14)           |
| Low-middle              | 152118<br>(124851 to<br>184061)       | 335789<br>(278324 to<br>403122)    | 120.74<br>(115.27 to<br>126.61)     | 4533 (3018<br>to 6152)       | 6180 (4994<br>to 7392)       | 36.34 (9.54<br>to 81.14)            | 203020<br>(126472 to<br>268417)   | 236584<br>(189248 to<br>283804)    | 16.53 (-9.40<br>to 65.68)           |
| Low                     | 41264<br>(33866 to<br>50406)          | 95941<br>(78454 to<br>116802)      | 132.51<br>(127.59 to<br>136.94)     | 1893 (1144<br>to 2626)       | 3125 (2442<br>to 4016)       | 65.06 (21.70<br>to 141.90)          | 92718<br>(45634 to<br>147570)     | 137867<br>(100264 to<br>180825)    | 48.69 (1.39<br>to 148.81)           |
| GBD region              |                                       |                                    |                                     |                              |                              |                                     |                                   |                                    |                                     |
| Andean Latin<br>America | 4294 (3643<br>to 5026)                | 10380<br>(8875 to<br>12027)        | 141.73<br>(131.47 to<br>153.82)     | 168 (99 to<br>249)           | 144 (111 to<br>182)          | -14.37<br>(-45.71 to<br>56.11)      | 10768<br>(5527 to<br>17349)       | 5942 (4666<br>to 7395)             | -44.82<br>(-67.80 to<br>12.24)      |
| Australasia             | 24135<br>(20445 to<br>28083)          | 53225<br>(47167 to<br>59881)       | 120.53<br>(104.13 to<br>137.71)     | 117 (103 to<br>139)          | 400 (291 to<br>465)          | 241.68<br>(120.09 to<br>298.29)     | 5802 (4531<br>to 7299)            | 13328<br>(10488 to<br>16560)       | 129.69<br>(92.95 to<br>151.94)      |

|    |                              |                         |                           |                           |                     |                     |                         |                        |                        |                          |
|----|------------------------------|-------------------------|---------------------------|---------------------------|---------------------|---------------------|-------------------------|------------------------|------------------------|--------------------------|
| 1  |                              |                         |                           |                           |                     |                     |                         |                        |                        |                          |
| 2  |                              |                         |                           |                           |                     |                     |                         |                        |                        |                          |
| 3  |                              |                         |                           |                           |                     |                     |                         |                        |                        |                          |
| 4  |                              | 13360                   |                           |                           |                     |                     |                         |                        |                        | 19.44                    |
| 5  | Caribbean                    | 8194 (7012 to 9634)     | (11262 to 15892)          | 63.04 (55.79 to 71.54)    | 157 (118 to 208)    | 210 (156 to 264)    | 33.66 (3.39 to 70.80)   | 7451 (5008 to 11792)   | 8900 (6523 to 11709)   | (-16.93 to 53.06)        |
| 6  |                              | 42100                   | 72034                     |                           |                     |                     |                         | 15952                  | 20237                  |                          |
| 7  |                              |                         |                           |                           |                     |                     |                         |                        |                        |                          |
| 8  |                              |                         |                           |                           |                     |                     |                         |                        |                        |                          |
| 9  | Central Asia                 | (35493 to 49944)        | (60489 to 86073)          | 71.10 (65.37 to 77.74)    | 215 (167 to 251)    | 249 (218 to 288)    | 15.70 (-1.33 to 47.63)  | (12800 to 19230)       | (16357 to 24806)       | 26.86 (10.10 to 46.33)   |
| 10 |                              | 290304                  | 236196                    | -18.64                    |                     |                     |                         | 61546                  | 54694                  | -11.13                   |
| 11 |                              |                         |                           |                           |                     |                     |                         |                        |                        |                          |
| 12 | Central Europe               | (249715 to 338920)      | (214732 to 259804)        | (-24.57 to -11.98)        | 604 (563 to 696)    | 958 (799 to 1104)   | 58.66 (24.18 to 83.87)  | (47417 to 77414)       | (42729 to 67570)       | (-18.70 to -3.30)        |
| 13 |                              | 40471                   | 81606                     | 101.64                    |                     |                     |                         | 183.85                 | 18096                  | 36178                    |
| 14 |                              |                         |                           |                           |                     |                     |                         |                        |                        |                          |
| 15 | Central Latin America        | (34451 to 47294)        | (69904 to 95542)          | (96.51 to 107.43)         | 301 (270 to 330)    | 854 (702 to 997)    | (135.53 to 232.71)      | (15456 to 20849)       | (30219 to 43014)       | 99.92 (74.40 to 127.28)  |
| 16 |                              |                         |                           |                           |                     |                     |                         |                        |                        |                          |
| 17 | Central Sub-Saharan Africa   | 2781 (2267 to 3400)     | 7015 (5690 to 8639)       | 152.29 (138.04 to 168.85) | 193 (118 to 301)    | 355 (254 to 497)    | 84.05 (16.03 to 200.18) | 9491 (4855 to 17734)   | (10733 to 22385)       | 64.1 (-9.96 to 213.74)   |
| 18 |                              | 244790                  | 925074                    | 277.90                    |                     |                     |                         |                        |                        |                          |
| 19 |                              |                         |                           |                           |                     |                     |                         |                        |                        |                          |
| 20 | East Asia                    | (202981 to 291054)      | (788347 to 1085238)       | (260.33 to 300.79)        | 5734 (4169 to 7374) | 4983 (4074 to 5769) | (-36.64 to 22.31)       | (167510 to 299891)     | (187123 to 299808)     | (-25.58 to 54.11)        |
| 21 |                              | 233969                  | 237672                    |                           |                     |                     |                         | 72932                  | 77123                  |                          |
| 22 |                              |                         |                           |                           |                     |                     |                         |                        |                        |                          |
| 23 | Eastern Europe               | (199922 to 274757)      | (203164 to 276577)        | 1.58 (-0.80 to 4.10)      | 1305 (992 to 1507)  | 1633 (1370 to 1865) | 25.06 (5.75 to 56.78)   | (57526 to 88869)       | (63287 to 94008)       | 5.75 (-4.27 to 21.34)    |
| 24 |                              |                         |                           |                           |                     |                     |                         |                        |                        |                          |
| 25 | Eastern Sub-Saharan Africa   | 7067 (5804 to 8596)     | 18830 (15395 to 22997)    | 166.43 (160.39 to 173.14) | 697 (462 to 1111)   | 1253 (923 to 1678)  | 79.64 (7.37 to 192.58)  | 35480 (16916 to 68481) | 52928 (39435 to 74044) | 49.18 (-19.5 to 202.23)  |
| 26 |                              | 255028                  | 459062                    |                           |                     |                     |                         | 51699                  | 78601                  |                          |
| 27 |                              |                         |                           |                           |                     |                     |                         |                        |                        |                          |
| 28 | High-income Asia Pacific     | (213480 to 302123)      | (403027 to 520418)        | 80.00 (65.57 to 95.92)    | 685 (439 to 789)    | 694 (556 to 912)    | 1.33 (-19.66 to 85.83)  | (38591 to 66563)       | (55261 to 105049)      | 52.04 (37.02 to 68.81)   |
| 29 |                              | 1100006                 | 920750                    | -16.30                    |                     |                     |                         | 158.55                 | 209072                 | 245234                   |
| 30 |                              |                         |                           |                           |                     |                     |                         |                        |                        |                          |
| 31 | High-income North America    | (961428 to 1248970)     | (859032 to 982587)        | (-22.94 to -9.05)         | 2442 (2189 to 2964) | 6314 (5076 to 6886) | (83.64 to 182.08)       | (155328 to 270983)     | (200564 to 294018)     | 17.30 (2.00 to 33.02)    |
| 32 |                              |                         |                           |                           |                     |                     |                         |                        |                        |                          |
| 33 | North Africa and Middle East | 89159 (76544 to 102596) | 282534 (239506 to 334478) | 216.89 (196.52 to 234.98) | 592 (407 to 836)    | 1033 (866 to 1226)  | 74.43 (20.30 to 164.45) | 35438 (25569 to 46318) | 72755 (56928 to 91112) | 105.30 (56.49 to 171.10) |
| 34 |                              |                         |                           |                           |                     |                     |                         |                        |                        |                          |
| 35 |                              |                         |                           |                           |                     |                     |                         |                        |                        |                          |
| 36 | Oceania                      | 199 (159 to 240)        | 417 (338 to 509)          | 109.69 (96.12 to 124.69)  | 22 (14 to 31)       | 36 (26 to 51)       | 65.38 (12.06 to 142.01) | 1036 (602 to 1625)     | 1696 (1107 to 2576)    | 63.81 (3.61 to 170.09)   |
| 37 |                              |                         |                           |                           |                     |                     |                         |                        |                        |                          |
| 38 |                              |                         |                           |                           |                     |                     |                         |                        |                        |                          |
| 39 | South Asia                   | (127077 to 195839)      | (272330 to 413946)        | (106.64 to 120.13)        | 3864 (2533 to 5504) | 5702 (4286 to 7410) | 47.58 (16.55 to 93.31)  | (105178 to 227334)     | (166881 to 278494)     | 29.47 (1.12 to 76.01)    |
| 40 |                              | 16557                   | 48152                     | 190.83                    |                     |                     |                         | 45316                  | 46686                  |                          |
| 41 |                              |                         |                           |                           |                     |                     |                         |                        |                        |                          |
| 42 | Southeast Asia               | (13040 to 20323)        | (39527 to 58063)          | (174.97 to 212.05)        | 1230 (741 to 1536)  | 1498 (1139 to 1771) | 21.79 (-3.10 to 72.54)  | (30762 to 56838)       | (38847 to 55186)       | 3.02 (-20.10 to 46.45)   |
| 43 |                              |                         |                           |                           |                     |                     |                         |                        |                        |                          |
| 44 |                              |                         |                           |                           |                     |                     |                         |                        |                        |                          |
| 45 | Southern Latin America       | 9153 (7618 to 10754)    | 15243 (12896 to 17894)    | 66.53 (58.55 to 74.68)    | 139 (123 to 151)    | 236 (210 to 280)    | 69.36 (46.49 to 101.01) | 5248 (4578 to 5993)    | 7740 (6670 to 9152)    | 47.49 (32.63 to 65.73)   |
| 46 |                              |                         |                           |                           |                     |                     |                         |                        |                        |                          |
| 47 |                              |                         |                           |                           |                     |                     |                         |                        |                        |                          |
| 48 |                              |                         |                           |                           |                     |                     |                         |                        |                        |                          |
| 49 |                              |                         |                           |                           |                     |                     |                         |                        |                        |                          |
| 50 |                              |                         |                           |                           |                     |                     |                         |                        |                        |                          |
| 51 |                              |                         |                           |                           |                     |                     |                         |                        |                        |                          |
| 52 |                              |                         |                           |                           |                     |                     |                         |                        |                        |                          |
| 53 |                              |                         |                           |                           |                     |                     |                         |                        |                        |                          |
| 54 |                              |                         |                           |                           |                     |                     |                         |                        |                        |                          |
| 55 |                              |                         |                           |                           |                     |                     |                         |                        |                        |                          |
| 56 |                              |                         |                           |                           |                     |                     |                         |                        |                        |                          |
| 57 |                              |                         |                           |                           |                     |                     |                         |                        |                        |                          |
| 58 |                              |                         |                           |                           |                     |                     |                         |                        |                        |                          |
| 59 |                              |                         |                           |                           |                     |                     |                         |                        |                        |                          |
| 60 |                              |                         |                           |                           |                     |                     |                         |                        |                        |                          |

|    |                |            |            |              |             |              |              |            |            |              |
|----|----------------|------------|------------|--------------|-------------|--------------|--------------|------------|------------|--------------|
| 1  |                |            |            |              |             |              |              |            |            |              |
| 2  |                |            |            |              |             |              |              |            |            |              |
| 3  |                | 18023)     |            |              |             |              |              |            |            |              |
| 4  |                |            |            |              |             |              |              |            |            |              |
| 5  | Southern       | 3760 (3109 | 8141 (6736 | 116.54       | 138 (99 to  | 240 (198 to  | 74.44 (31.74 | 6615 (4279 | 9230 (7542 | 39.54 (-0.67 |
| 6  | Sub-Saharan    | to 4581)   | to 9864)   | (109.70 to   | 169)        | 278)         | to 161.11)   | to 9518)   | to 10926)  | to 121.74)   |
| 7  | Africa         |            |            | 124.72)      |             |              |              |            |            |              |
| 8  |                | 74856      | 117653     |              |             |              | 129.84       | 27724      | 46997      |              |
| 9  | Tropical Latin | (65373 to  | (102012 to | 57.17 (51.82 | 455 (400 to | 1047 (950    | (109.36 to   | (23589 to  | (40115 to  | 69.52 (59.16 |
| 10 | America        | 85425)     | 134397)    | to 63.44)    | 492)        | to 1217)     | 167.46)      | 32357)     | 54972)     | to 83.74)    |
| 11 |                | 707145     | 1026504    |              |             |              | 160.46       | 185733     | 310691     |              |
| 12 | Western Europe | (634121 to | (925440 to | 45.16 (41.37 | 4600 (4132  | 11981 (9244  | (66.17 to    | (149509 to | (255911 to | 67.28 (34.40 |
| 13 |                | 786986)    | 1127578)   | to 48.78)    | to 5864)    | to 13315)    | 190.17)      | 227830)    | 371106)    | to 79.72)    |
| 14 | Western        | 10222      | 28965      | 183.36       |             |              |              | 31197      | 56026      |              |
| 15 | Sub-Saharan    | (8432 to   | (23820 to  | (178.45 to   | 634 (365 to | 1178 (805 to | 85.67 (40.49 | (14381 to  | (35327 to  | 79.59 (30.21 |
| 16 | Africa         | 12421)     | 35133)     | 188.56)      | 996)        | 1610)        | to 177.24)   | 47867)     | 78051)     | to 198.66)   |

Abbreviations: GBD=Global Burden of Disease. SDI=Socio-demographic Index.  
 UI=uncertainty interval.

**Supplementary Table 2** Incident cases, YLLs and YLDs of inflammatory bowel disease (IBD) in 1990 and 2019 and their percentage change from 1990 to 2019

| Characteristics         | Incident cases                  |                                 |                                     | YLLs                            |                                 |                                     | YLDs                            |                                 |                                     |
|-------------------------|---------------------------------|---------------------------------|-------------------------------------|---------------------------------|---------------------------------|-------------------------------------|---------------------------------|---------------------------------|-------------------------------------|
|                         | 1990 No.<br>(95%UI)             | 2019 No.<br>(95%UI)             | Percentage<br>change (%)<br>(95%UI) | 1990 No.<br>(95%UI)             | 2019 No.<br>(95%UI)             | Percentage<br>change (%)<br>(95%UI) | 1990 No.<br>(95%UI)             | 2019 No.<br>(95%UI)             | Percentage<br>change (%)<br>(95%UI) |
| Global                  | 293572<br>(257425 to<br>336651) | 404552<br>(360521 to<br>456478) | 37.80 (33.91<br>to 41.98)           | 757137<br>(557008 to<br>914270) | 895798<br>(779706 to<br>999120) | 18.31 (-1.81<br>to 52.08)           | 491137<br>(326283 to<br>678806) | 726701<br>(487015 to<br>993466) | 47.96 (43.96<br>to 52.28)           |
| Sex                     |                                 |                                 |                                     |                                 |                                 |                                     |                                 |                                 |                                     |
| Male                    | 153074<br>(133344 to<br>174640) | 213814<br>(189759 to<br>241304) | 39.68 (36.00<br>to 43.73)           | 370299<br>(264345 to<br>462642) | 450214<br>(368766 to<br>507382) | 21.58 (-1.85<br>to 53.89)           | 230665<br>(152583 to<br>318772) | 352534<br>(235403 to<br>486701) | 52.83 (48.57<br>to 57.83)           |
| Female                  | 140498<br>(123361 to<br>161173) | 190738<br>(171154 to<br>213778) | 35.76 (31.29<br>to 39.92)           | 386839<br>(242819 to<br>477114) | 445584<br>(372799 to<br>510194) | 15.19 (-5.95<br>to 67.02)           | 260473<br>(173833 to<br>359493) | 374167<br>(251188 to<br>513406) | 43.65 (39.16<br>to 48.19)           |
| SDI quintile            |                                 |                                 |                                     |                                 |                                 |                                     |                                 |                                 |                                     |
| High                    | 171841<br>(151878 to<br>195746) | 196451<br>(179556 to<br>217510) | 14.32 (9.64<br>to 19.56)            | 139690<br>(129255 to<br>171300) | 268406<br>(221318 to<br>288862) | 92.14 (36.87<br>to 107.98)          | 275795<br>(183466 to<br>378544) | 334924<br>(229615 to<br>452309) | 21.44 (15.85<br>to 27.66)           |
| High-middle             | 71474<br>(62545 to<br>81510)    | 94553<br>(84101 to<br>107156)   | 32.29 (29.05<br>to 36.06)           | 149876<br>(130428 to<br>171308) | 151980<br>(137423 to<br>168345) | 1.40 (-11.32<br>to 17.80)           | 138460<br>(92476 to<br>192296)  | 200814<br>(133980 to<br>276597) | 45.03 (40.58<br>to 50.41)           |
| Middle                  | 27459<br>(23259 to<br>32310)    | 59817<br>(50973 to<br>70648)    | 117.84 (108.98 to<br>127.40)        | 201655<br>(144191 to<br>243718) | 167470<br>(141946 to<br>187219) | -16.95 (-32.64 to<br>19.35)         | 46484<br>(30292 to<br>65651)    | 123619<br>(80636 to<br>174495)  | 165.94 (155.28 to<br>177.70)        |
| Low-middle              | 17434<br>(14532 to<br>20935)    | 36681<br>(30862 to<br>44031)    | 110.40 (104.05 to<br>116.72)        | 179309<br>(103608 to<br>244139) | 184730<br>(144128 to<br>223656) | 3.02 (-21.85<br>to 54.27)           | 23711<br>(15318 to<br>33814)    | 51855<br>(33811 to<br>73563)    | 118.69 (110.14 to<br>127.95)        |
| Low                     | 5279 (4395<br>to 6379)          | 12215<br>(10164 to<br>14793)    | 131.41 (126.67 to<br>136.00)        | 86179<br>(39359 to<br>140538)   | 122638<br>(86434 to<br>167342)  | 42.31 (-5.62<br>to 150.88)          | 6540 (4199<br>to 9362)          | 15228 (9694<br>to 22000)        | 132.87 (123.17 to<br>142.33)        |
| GBD region              |                                 |                                 |                                     |                                 |                                 |                                     |                                 |                                 |                                     |
| Andean Latin<br>America | 472 (402 to<br>550)             | 1128 (975 to<br>1314)           | 138.95 (128.76 to<br>150.71)        | 10085 (4860<br>to 16590)        | 4311 (3237<br>to 5564)          | -57.25 (-76.23 to<br>-4.50)         | 682 (439 to<br>990)             | 1631 (1060<br>to 2311)          | 139.04 (119.92 to<br>161.86)        |
| Australasia             | 2979 (2556<br>to 3481)          | 6446 (5755<br>to 7212)          | 116.39 (101.08 to<br>132.24)        | 2212 (1997<br>to 2709)          | 5448 (4212<br>to 6156)          | 146.25 (61.5<br>to 182.75)          | 3590 (2340<br>to 5079)          | 7879 (5232<br>to 10860)         | 119.48 (94.61 to<br>145.44)         |
| Caribbean               | 677 (580 to<br>796)             | 1312 (1121<br>to 1571)          | 93.82 (84.67<br>to 103.42)          | 6186 (3853<br>to 10389)         | 6861 (4657<br>to 9603)          | 10.92 (-26.38 to<br>51.60)          | 1266 (836<br>to 1782)           | 2038 (1332<br>to 2893)          | 61.05 (49.16<br>to 73.60)           |
| Central Asia            | 3514 (2995<br>to 4146)          | 6461 (5487<br>to 7637)          | 83.87 (77.84<br>to 90.36)           | 9604 (7718<br>to 11578)         | 9458 (8184<br>to 10959)         | -1.52 (-20.39 to<br>17.35)          | 6348 (4181<br>to 9075)          | 10778 (7154<br>to 15134)        | 69.79 (58.22<br>to 81.49)           |

|    |                |             |              |              |            |             |              |              |              |              |
|----|----------------|-------------|--------------|--------------|------------|-------------|--------------|--------------|--------------|--------------|
| 1  |                |             |              |              |            |             |              |              |              |              |
| 2  |                |             |              |              |            |             |              |              |              |              |
| 3  |                |             |              |              |            | 25.90)      |              |              |              |              |
| 4  |                |             |              |              |            |             |              |              |              |              |
| 5  |                | 20997       | 14809        | -29.47       | 19517      | 20261       |              | 42029        | 34433        | -18.07       |
| 6  | Central Europe | (18082 to   | (13443 to    | (-33.69 to   | (17440 to  | (17005 to   | 3.81 (-12.56 | (28219 to    | (23103 to    | (-23.95 to   |
| 7  |                | 24170)      | 16391)       | -24.67)      | 21350)     | 23354)      | to 21.14)    | 58172)       | 46581)       | -11.37)      |
| 8  |                |             |              |              | 11909      | 23887       | 100.58       |              |              |              |
| 9  | Central Latin  | 3968 (3402  | 6754 (5834   | 70.22 (64.07 |            |             |              | 6187 (4023   | 12291 (8076  | 98.64 (90.00 |
| 10 | America        | to 4618)    | to 7826)     | to 77.19)    | (10476 to  | (19416 to   | (62.63 to    | to 8802)     | to 17492)    | to 107.98)   |
| 11 |                |             |              |              | 13363)     | 28208)      | 141.31)      |              |              |              |
| 12 |                |             |              | 201.42       |            |             | 59.71        |              |              | 151.34       |
| 13 | Central        | 381 (318 to | 1150 (955 to |              | 9036 (4403 | 14431 (9735 |              | 455 (291 to  | 1142 (725 to |              |
| 14 | Sub-Saharan    | 469)        | 1400)        | (188.00 to   | to 17181)  | to 21338)   | (-15.47 to   | 663)         | 1644)        | (136.85 to   |
| 15 | Africa         |             |              | 216.18)      |            |             | 217.75)      |              |              | 168.27)      |
| 16 |                | 17567       | 52319        | 197.82       | 202402     | 101852      | -49.68       | 37829        | 138111       | 265.09       |
| 17 |                |             |              |              |            |             |              |              |              |              |
| 18 | East Asia      | (14627 to   | (44680 to    | (178.88 to   | (132058 to | (80904 to   | (-63.19 to   | (24646 to    | (90529 to    | (244.38 to   |
| 19 |                | 20802)      | 61455)       | 220.44)      | 259475)    | 117925)     | -16.68)      | 53906)       | 194304)      | 290.80)      |
| 20 |                | 18150       | 19500        |              | 39012      | 42550       |              | 33920        | 34573        |              |
| 21 | Eastern Europe | (15600 to   | (16838 to    | 7.44 (5.08   | (29086 to  | (36378 to   | 9.07 (-8.79  | (22663 to    | (23253 to    | 1.92 (-2.34  |
| 22 |                | 21209)      | 22671)       | to 9.90)     | 45400)     | 48906)      | to 41.38)    | 47811)       | 48708)       | to 6.15)     |
| 23 |                |             |              |              |            |             |              |              |              |              |
| 24 | Eastern        |             |              | 168.96       | 34323      | 49854       | 45.25        |              |              | 165.68       |
| 25 | Sub-Saharan    | 1092 (908   | 2938 (2449   |              | (15796 to  | (36274 to   | (-23.18 to   | 1157 (736 to | 3074 (1958   |              |
| 26 | Africa         | to 1315)    | to 3538)     | (163.69 to   | 66928)     | 71146)      | 204.58)      | 1664)        | to 4469)     | (159.54 to   |
| 27 |                |             |              | 175.74)      |            |             |              |              |              | 172.36)      |
| 28 |                | 18105       | 27084        |              | 14265      | 10285 (8672 | -27.90       | 37434        | 68316        |              |
| 29 | High-income    | (15391 to   | (23870 to    | 49.59 (40.22 | (11234 to  | to 13984)   | (-41.19 to   | (24881 to    | (45509 to    | 82.50 (67.39 |
| 30 | Asia Pacific   | 21422)      | 30621)       | to 59.35)    | 15903)     |             | 11.39)       | 52603)       | 94577)       | to 99.60)    |
| 31 |                | 107616      | 99611        | -7.44        | 48899      | 111196      | 127.40       | 160173       | 134037       | -16.32       |
| 32 | High-income    | (94147 to   | (91945 to    | (-13.45 to   | (45188 to  | (90610 to   | (58.53 to    | (106818 to   | (92136 to    | (-22.94 to   |
| 33 | North America  | 123884)     | 109000)      | -0.48)       | 60393)     | 118997)     | 147.53)      | 221989)      | 178957)      | -9.00)       |
| 34 |                |             |              |              |            |             |              |              |              |              |
| 35 | North Africa   | 8107 (7040  | 22722        | 180.29       | 21634      | 30142       | 39.33 (-4.16 | 13804 (8984  | 42612        | 208.69       |
| 36 | and Middle     | to 9204)    | (19277 to    | (162.24 to   | (13448 to  | (25222 to   | to 131.21)   | to 19350)    | (27805 to    | (184.84 to   |
| 37 | East           | 26952)      | 26952)       | 198.18)      | 31651)     | 36090)      |              |              | 59873)       | 233.72)      |
| 38 |                |             |              |              |            |             |              |              |              |              |
| 39 |                |             |              | 181.23       | 1003 (571  | 1628 (1040  | 62.31 (1.40  | 33 (20 to    | 69 (43 to    | 109.64       |
| 40 | Oceania        | 22 (18 to   | 63 (52 to    | (166.43 to   | to 1593)   | to 2510)    | to 173.45)   | 48)          | 102)         | (96.04 to    |
| 42 |                | 27)         | 77)          | 197.89)      |            |             |              |              |              | 124.81)      |
| 43 |                |             |              |              |            |             |              |              |              |              |
| 44 |                | 18439       | 39705        | 115.33       | 146986     | 170233      | 15.82        | 24461        | 51744        | 111.54       |
| 45 | South Asia     | (15169 to   | (32943 to    | (107.88 to   | (82781 to  | (122056 to  | (-12.64 to   | (15784 to    | (33609 to    | (102.18 to   |
| 46 |                | 22582)      | 48454)       | 123.07)      | 202629)    | 222489)     | 63.63)       | 35449)       | 74915)       | 121.79)      |
| 47 |                |             |              |              |            |             |              |              |              |              |
| 48 |                |             |              | 164.62       | 42561      | 38819       | -8.79        |              |              | 185.53       |
| 49 | Southeast Asia | 1882 (1527  | 4980 (4182   |              | (28111 to  | (32029 to   | (-30.14 to   | 2755 (1714   | 7867 (5022   |              |
| 50 |                | to 2270)    | to 5972)     | (151.61 to   | 54072)     | 46584)      | 30.72)       | to 4108)     | to 11568)    | (161.80 to   |
| 51 |                |             |              | 181.06)      |            |             |              |              |              | 213.61)      |
| 52 | Southern Latin | 879 (742 to | 1382 (1177   | 57.15 (49.53 | 3794 (3293 | 5362 (4801  | 41.34 (23.31 | 1454 (944    | 2377 (1528   | 63.53 (47.49 |
| 53 | America        | 1030)       | to 1620)     | to 64.67)    | to 4092)   | to 6325)    | to 66.99)    | to 2091)     | to 3449)     | to 82.12)    |
| 54 |                |             |              |              |            |             |              |              |              | 113.43       |
| 55 | Southern       | 504 (423 to | 989 (837 to  | 96.29 (90.20 | 6007 (3712 | 7933 (6389  | 32.06 (-8.55 | 608 (390 to  | 1298 (837    |              |
| 56 | Sub-Saharan    | 608)        | 1188)        | to 103.76)   | to 8927)   | to 9558)    | to 122.99)   | 884)         | to 1875)     | (105.15 to   |
| 57 | Africa         |             |              |              |            |             |              |              |              | 123.26)      |
| 58 | Tropical Latin | 7826 (6859  | 12928        | 65.19 (58.70 | 16336      | 29155       | 78.46 (62.35 | 11387 (7351  | 17842        | 56.68 (48.38 |
| 59 | America        | to 8976)    | (11334 to    | to 72.03)    | (14276 to  | (26876 to   | to 103.68)   | to 15958)    | (11730 to    | to 65.76)    |
| 60 |                |             |              |              |            |             |              |              |              |              |



1  
2  
3  
4  
5  
6  
7  
8  
9  
10  
11  
12  
13  
14  
15  
16  
17  
18  
19  
20  
21  
22  
23  
24  
25  
26  
27  
28  
29  
30  
31  
32  
33  
34  
35  
36  
37  
38  
39  
40  
41  
42  
43  
44  
45  
46  
47  
48  
49  
50  
51  
52  
53  
54  
55  
56  
57  
58  
59  
60

|                  |            |            |              |           |            |              |            |            |              |
|------------------|------------|------------|--------------|-----------|------------|--------------|------------|------------|--------------|
|                  |            | 14874)     |              | 18011)    | 33305)     |              |            | 25165)     |              |
|                  | 59081      | 78645      | 33.11 (30.56 | 81826     | 160823     | 96.54 (25.96 | 103907     | 149868     | 44.23 (39.12 |
| 6 Western Europe | (53733 to  | (71611 to  | to 35.75)    | (75154 to | (127602 to | to 118.11)   | (69789 to  | (101976 to | to 49.03)    |
|                  | 65529)     | 86709)     |              | 106409)   | 175684)    |              | 141113)    | 202986)    |              |
| 8                |            |            | 176.18       | 29540     | 51309      |              |            |            | 184.63       |
| 9 Western        | 1314 (1102 | 3628 (3028 | (171.94 to   | (12580 to | (30850 to  | 73.69 (23.64 | 1657 (1057 | 4717 (3002 | (179.19 to   |
| 10 Sub-Saharan   | to 1599)   | to 4401)   | 180.47)      | 46343)    | 73337)     | to 200.73)   | to 2403)   | to 6840)   | 190.47)      |
| 11 Africa        |            |            |              |           |            |              |            |            |              |

Abbreviations: GBD=Global Burden of Disease. SDI=Socio-demographic Index. UI=uncertainty interval. YLDs=years of life lived with disability. YLLs=years of life lost.

For peer review only

**Supplementary Table 3** Age-standardised incidence, YLL and YLD rates for inflammatory bowel disease (IBD) in 1990 and 2019 and their temporal trends from 1990 to 2019

| Characteristics       | Age-standardised incidence rate |                        |                        | Age-standardized YLL rate |                        |                        | Age-standardized YLD rate |                        |                        |
|-----------------------|---------------------------------|------------------------|------------------------|---------------------------|------------------------|------------------------|---------------------------|------------------------|------------------------|
|                       | per 100,000 population          |                        |                        | per 100,000 population    |                        |                        | per 100,000 population    |                        |                        |
|                       | 1990 No.<br>(95%UI)             | 2019 No.<br>(95%UI)    | EAPC No.<br>(95%CI)    | 1990 No.<br>(95%UI)       | 2019 No.<br>(95%UI)    | EAPC No.<br>(95%CI)    | 1990 No.<br>(95%UI)       | 2019 No.<br>(95%UI)    | EAPC No.<br>(95%CI)    |
| Global                | 6.10 (5.35 to 6.96)             | 4.97 (4.43 to 5.59)    | -0.60 (-0.73 to -0.48) | 16.47 (12.78 to 19.33)    | 11.35 (9.89 to 12.70)  | -1.33 (-1.37 to -1.30) | 10.73 (7.16 to 14.82)     | 8.80 (5.90 to 12.05)   | -0.62 (-0.70 to -0.53) |
| Sex                   |                                 |                        |                        |                           |                        |                        |                           |                        |                        |
| Male                  | 6.39 (5.60 to 7.29)             | 5.30 (4.72 to 5.99)    | -0.55 (-0.68 to -0.43) | 17.08 (12.95 to 20.96)    | 11.98 (9.82 to 13.45)  | -1.29 (-1.32 to -1.27) | 10.32 (6.91 to 14.27)     | 8.66 (5.80 to 11.93)   | -0.53 (-0.60 to -0.47) |
| Female                | 5.80 (5.12 to 6.61)             | 4.64 (4.16 to 5.20)    | -0.65 (-0.78 to -0.53) | 15.95 (10.70 to 19.09)    | 10.74 (8.88 to 12.44)  | -1.39 (-1.43 to -1.35) | 11.15 (7.43 to 15.41)     | 8.96 (6.02 to 12.30)   | -0.69 (-0.79 to -0.59) |
| SDI region            |                                 |                        |                        |                           |                        |                        |                           |                        |                        |
| High                  | 18.96 (16.73 to 21.58)          | 17.61 (16.03 to 19.41) | -0.16 (-0.30 to -0.01) | 14.41 (13.34 to 17.57)    | 15.64 (13.09 to 16.73) | 0.56 (0.41 to 0.70)    | 29.54 (19.66 to 40.6)     | 27.29 (18.55 to 37.18) | -0.30 (-0.39 to -0.21) |
| High-middle           | 6.12 (5.36 to 6.99)             | 5.58 (4.97 to 6.28)    | -0.35 (-0.45 to -0.24) | 13.87 (12.06 to 15.79)    | 8.37 (7.56 to 9.33)    | -1.99 (-2.11 to -1.88) | 12.05 (8.08 to 16.72)     | 10.97 (7.26 to 15.12)  | -0.26 (-0.40 to -0.13) |
| Middle                | 1.83 (1.58 to 2.15)             | 2.27 (1.94 to 2.68)    | 1.07 (0.95 to 1.18)    | 14.68 (11.06 to 17.93)    | 7 (5.95 to 7.79)       | -2.77 (-2.85 to -2.69) | 3.43 (2.26 to 4.84)       | 4.61 (3.01 to 6.52)    | 1.22 (1.01 to 1.43)    |
| Low-middle            | 2.00 (1.70 to 2.40)             | 2.21 (1.88 to 2.65)    | 0.46 (0.35 to 0.57)    | 20.36 (13.37 to 27.43)    | 12.15 (9.66 to 14.61)  | -1.99 (-2.09 to -1.90) | 2.93 (1.93 to 4.16)       | 3.22 (2.12 to 4.56)    | 0.50 (0.38 to 0.62)    |
| Low                   | 1.46 (1.23 to 1.77)             | 1.52 (1.29 to 1.83)    | 0.37 (0.31 to 0.44)    | 20.24 (12.52 to 27.74)    | 15.18 (11.82 to 19.54) | -1.08 (-1.14 to -1.02) | 1.95 (1.26 to 2.82)       | 2.02 (1.32 to 2.88)    | 0.28 (0.19 to 0.37)    |
| GBD region            |                                 |                        |                        |                           |                        |                        |                           |                        |                        |
| Andean Latin America  | 1.63 (1.41 to 1.91)             | 1.82 (1.57 to 2.12)    | -0.05 (-0.29 to 0.20)  | 23.76 (13.24 to 36.33)    | 7.15 (5.41 to 9.17)    | -4.50 (-5.07 to -3.92) | 2.6 (1.67 to 3.8)         | 2.68 (1.74 to 3.79)    | 0.05 (0.01 to 0.08)    |
| Australasia           | 13.56 (11.64 to 15.80)          | 20.03 (17.79 to 22.57) | 0.94 (0.72 to 1.16)    | 9.98 (9.01 to 12.07)      | 11.54 (8.93 to 13.01)  | 1.11 (0.82 to 1.41)    | 16.21 (10.57 to 22.95)    | 23.45 (15.53 to 32.51) | 0.86 (0.63 to 1.09)    |
| Caribbean             | 2.11 (1.83 to 2.49)             | 2.63 (2.24 to 3.14)    | 0.49 (0.34 to 0.64)    | 19.10 (12.84 to 29.41)    | 14.19 (9.36 to 20.49)  | -1.13 (-1.33 to -0.93) | 4.28 (2.83 to 6.06)       | 4.02 (2.62 to 5.72)    | -0.06 (-0.14 to 0.01)  |
| Central Asia          | 5.99 (5.13 to 7.07)             | 6.9 (5.87 to 8.13)     | 0.50 (0.46 to 0.53)    | 14.63 (11.46 to 17.20)    | 10.56 (9.16 to 12.18)  | -1.41 (-1.54 to -1.29) | 11.48 (7.62 to 16.46)     | 11.7 (7.77 to 16.39)   | 0.08 (0.04 to 0.11)    |
| Central Europe        | 15.78 (13.61 to 18.19)          | 11.59 (10.51 to 12.81) | -1.38 (-1.76 to -0.99) | 15.87 (13.6 to 17.59)     | 11.95 (10.00 to 13.79) | -0.91 (-1.11 to -0.72) | 30.41 (20.26 to 42.11)    | 23.89 (15.95 to 32.56) | -1.16 (-1.53 to -0.79) |
| Central Latin America | 3.16 (2.74 to 3.66)             | 2.64 (2.29 to 3.06)    | -0.70 (-0.87 to -0.54) | 9.15 (8.21 to 10.10)      | 9.79 (7.96 to 11.55)   | 0.81 (0.47 to 1.16)    | 5.69 (3.74 to 8.02)       | 4.89 (3.22 to 6.96)    | -0.50 (-0.58 to -0.42) |
| Central Sub-Saharan   | 1.04 (0.88 to 1.26)             | 1.26 (1.06 to 1.52)    | 0.64 (0.59 to 0.70)    | 20.92 (13.38 to 31.16)    | 16.45 (11.73 to 22.99) | -0.84 (-0.92 to -0.75) | 1.33 (0.87 to 1.94)       | 1.32 (0.85 to 1.91)    | -0.16 (-0.35 to 0.04)  |

|    |                |                      |                        |                        |                        |                        |                        |                        |                        |                        |
|----|----------------|----------------------|------------------------|------------------------|------------------------|------------------------|------------------------|------------------------|------------------------|------------------------|
| 1  |                |                      |                        |                        |                        |                        |                        |                        |                        |                        |
| 2  |                |                      |                        |                        |                        |                        |                        |                        |                        |                        |
| 3  | Africa         |                      |                        |                        |                        |                        |                        |                        |                        |                        |
| 4  |                |                      |                        |                        |                        |                        |                        |                        |                        |                        |
| 5  | East Asia      | 1.45 (1.22 to 1.71)  | 2.95 (2.55 to 3.43)    | 2.54 (2.39 to 2.69)    | 20.78 (14.55 to 26.09) | 6.12 (4.90 to 7.03)    | -4.52 (-4.79 to -4.24) | 3.45 (2.26 to 4.87)    | 6.95 (4.57 to 9.69)    | 2.74 (2.37 to 3.12)    |
| 6  |                |                      |                        |                        |                        |                        |                        |                        |                        |                        |
| 7  |                | 7.10 (6.12 to 8.29)  | 7.34 (6.34 to 8.55)    | 0.07 (-0.02 to 0.17)   | 14.85 (11.23 to 17.29) | 14.46 (12.37 to 16.65) | -0.56 (-0.82 to -0.30) | 12.83 (8.55 to 18.05)  | 12.21 (8.15 to 17.24)  | 0.05 (-0.07 to 0.17)   |
| 8  | Eastern Europe |                      |                        |                        |                        |                        |                        |                        |                        |                        |
| 9  |                |                      |                        |                        |                        |                        |                        |                        |                        |                        |
| 10 | Eastern        | 0.89 (0.76 to 1.07)  | 1.04 (0.88 to 1.25)    | 0.55 (0.48 to 0.61)    | 21.56 (15.07 to 32.54) | 18.27 (13.48 to 24.41) | -0.51 (-0.59 to -0.43) | 1.02 (0.66 to 1.46)    | 1.17 (0.76 to 1.67)    | 0.44 (0.40 to 0.48)    |
| 11 | Sub-Saharan    |                      |                        |                        |                        |                        |                        |                        |                        |                        |
| 12 | Africa         |                      |                        |                        |                        |                        |                        |                        |                        |                        |
| 13 |                |                      |                        |                        |                        |                        |                        |                        |                        |                        |
| 14 | High-income    | 9.25 (7.88 to 10.91) | 14.93 (13.14 to 16.93) | 1.10 (0.84 to 1.37)    | 7.85 (6.04 to 8.80)    | 2.74 (2.35 to 3.86)    | -4.07 (-4.38 to -3.77) | 18.58 (12.28 to 26.01) | 31.81 (21.06 to 44.06) | 1.11 (0.73 to 1.49)    |
| 15 | Asia Pacific   |                      |                        |                        |                        |                        |                        |                        |                        |                        |
| 16 |                | 34.88                |                        |                        |                        |                        |                        |                        |                        |                        |
| 17 | High-income    | (30.59 to 40.02)     | 24.51 (22.65 to 26.77) | -0.82 (-1.20 to -0.45) | 14.94 (13.84 to 18.40) | 20.18 (16.54 to 21.51) | 1.26 (1.03 to 1.50)    | 50.69 (33.71 to 70.19) | 31.1 (21.34 to 41.87)  | -1.28 (-1.69 to -0.86) |
| 18 | North America  |                      |                        |                        |                        |                        |                        |                        |                        |                        |
| 19 |                |                      |                        |                        |                        |                        |                        |                        |                        |                        |
| 20 | North Africa   |                      |                        |                        |                        |                        |                        |                        |                        |                        |
| 21 | and Middle     | 2.95 (2.59 to 3.38)  | 3.74 (3.19 to 4.45)    | 0.62 (0.53 to 0.72)    | 8.82 (5.96 to 12.45)   | 6.06 (5.08 to 7.15)    | -1.32 (-1.36 to -1.29) | 5.55 (3.65 to 7.72)    | 7.21 (4.74 to 10.1)    | 0.88 (0.76 to 1.00)    |
| 22 | East           |                      |                        |                        |                        |                        |                        |                        |                        |                        |
| 23 |                |                      |                        |                        |                        |                        |                        |                        |                        |                        |
| 24 |                | 0.44 (0.36 to 0.52)  | 0.56 (0.47 to 0.67)    | 0.87 (0.76 to 0.98)    | 19.89 (12.45 to 28.10) | 14.30 (9.82 to 20.46)  | -1.32 (-1.41 to -1.23) | 0.71 (0.45 to 1.03)    | 0.63 (0.40 to 0.93)    | -0.53 (-0.72 to -0.34) |
| 25 | Oceania        |                      |                        |                        |                        |                        |                        |                        |                        |                        |
| 26 |                | 2.15 (1.79 to 2.64)  | 2.32 (1.93 to 2.84)    | 0.47 (0.31 to 0.63)    | 18.45 (11.93 to 26.19) | 10.91 (7.96 to 14.27)  | -2.10 (-2.23 to -1.97) | 3.02 (1.97 to 4.38)    | 3.08 (2.01 to 4.49)    | 0.25 (0.09 to 0.40)    |
| 27 | South Asia     |                      |                        |                        |                        |                        |                        |                        |                        |                        |
| 28 |                | 0.46 (0.38 to 0.56)  | 0.70 (0.59 to 0.84)    | 1.45 (1.27 to 1.63)    | 12.43 (7.76 to 15.13)  | 6.35 (5.08 to 7.61)    | -2.69 (-2.85 to -2.53) | 0.73 (0.46 to 1.09)    | 1.09 (0.7 to 1.60)     | 1.52 (1.22 to 1.83)    |
| 29 | Southeast Asia |                      |                        |                        |                        |                        |                        |                        |                        |                        |
| 30 |                | 1.82 (1.54 to 2.13)  | 1.92 (1.63 to 2.26)    | 0.24 (0.15 to 0.34)    | 8.05 (7.00 to 8.69)    | 6.85 (6.15 to 8.08)    | -0.71 (-0.86 to -0.56) | 3.05 (1.98 to 4.38)    | 3.21 (2.06 to 4.68)    | 0.23 (0.04 to 0.42)    |
| 31 | Southern Latin |                      |                        |                        |                        |                        |                        |                        |                        |                        |
| 32 | America        |                      |                        |                        |                        |                        |                        |                        |                        |                        |
| 33 |                | 1.30 (1.10 to 1.56)  | 1.37 (1.17 to 1.65)    | 0.13 (0.06 to 0.20)    | 13.43 (9.33 to 17.23)  | 11.79 (9.6 to 13.95)   | -0.20 (-0.55 to 0.15)  | 1.67 (1.08 to 2.41)    | 1.87 (1.22 to 2.70)    | 0.48 (0.41 to 0.55)    |
| 34 | Southern       |                      |                        |                        |                        |                        |                        |                        |                        |                        |
| 35 | Sub-Saharan    |                      |                        |                        |                        |                        |                        |                        |                        |                        |
| 36 | Africa         |                      |                        |                        |                        |                        |                        |                        |                        |                        |
| 37 |                | 6.09 (5.40 to 6.93)  | 5.25 (4.60 to 6.03)    | -0.55 (-0.59 to -0.51) | 13.65 (11.97 to 14.87) | 12.09 (11.13 to 13.83) | -0.18 (-0.34 to -0.02) | 9.72 (6.37 to 13.54)   | 7.17 (4.71 to 10.10)   | -0.83 (-1.04 to -0.63) |
| 38 | Tropical Latin |                      |                        |                        |                        |                        |                        |                        |                        |                        |
| 39 | America        |                      |                        |                        |                        |                        |                        |                        |                        |                        |
| 40 |                | 13.98                |                        |                        |                        |                        |                        |                        |                        |                        |
| 41 |                | (12.67 to 15.48)     | 16.94 (15.33 to 18.73) | 0.60 (0.55 to 0.65)    | 16.07 (14.83 to 20.58) | 18.85 (15.12 to 20.42) | 0.92 (0.72 to 1.11)    | 23.17 (15.52 to 31.53) | 27.93 (19.01 to 38.12) | 0.38 (0.26 to 0.49)    |
| 42 | Western Europe |                      |                        |                        |                        |                        |                        |                        |                        |                        |
| 43 |                |                      |                        |                        |                        |                        |                        |                        |                        |                        |
| 44 |                |                      |                        |                        |                        |                        |                        |                        |                        |                        |
| 45 | Western        | 1.01 (0.86 to 1.23)  | 1.17 (1.00 to 1.41)    | 0.36 (0.22 to 0.50)    | 18.33 (10.38 to 29.12) | 15.14 (10.25 to 20.82) | -0.69 (-0.80 to -0.58) | 1.37 (0.89 to 1.98)    | 1.63 (1.06 to 2.34)    | 0.78 (0.66 to 0.90)    |
| 46 | Sub-Saharan    |                      |                        |                        |                        |                        |                        |                        |                        |                        |
| 47 | Africa         |                      |                        |                        |                        |                        |                        |                        |                        |                        |
| 48 |                |                      |                        |                        |                        |                        |                        |                        |                        |                        |

Abbreviations: CI=confidence interval. EAPC=estimated annual percentage change. GBD=Global Burden of Disease. SDI=Socio-demographic Index. UI=uncertainty interval. YLD=years of life lived with disability. YLL=years of life lost.

**Supplementary Table 4** Prevalent cases, deaths and disability adjusted life years (DALYs) for inflammatory bowel disease (IBD) by 204 countries or territories in 2019 and 2019, and their percentage change from 1990 to 2019

| Characteristics     | Prevalent cases        |                        |                                     | Deaths              |                     |                                     | DALYs               |                       |                                     |
|---------------------|------------------------|------------------------|-------------------------------------|---------------------|---------------------|-------------------------------------|---------------------|-----------------------|-------------------------------------|
|                     | 1990 No.<br>(95%UI)    | 2019 No.<br>(95%UI)    | Percentage<br>change (%)<br>(95%UI) | 1990 No.<br>(95%UI) | 2019 No.<br>(95%UI) | Percentage<br>change (%)<br>(95%UI) | 1990 No.<br>(95%UI) | 2019 No.<br>(95%UI)   | Percentage<br>change (%)<br>(95%UI) |
| Afghanistan         | 1738 (1410 to 2120)    | 5699 (4548 to 7113)    | 228.01 (200.09 to 258.61)           | 31 (14 to 55)       | 58 (31 to 89)       | 88.34 (29.82 to 190.04)             | 1237 (627 to 2377)  | 3017 (1879 to 4660)   | 143.91 (72.00 to 244.29)            |
| Albania             | 3324 (2792 to 3928)    | 3896 (3286 to 4630)    | 17.22 (7.74 to 27.7)                | 50 (21 to 65)       | 13 (9 to 19)        | -74.70 (-84.65 to -32.21)           | 3904 (1399 to 5200) | 991 (727 to 1300)     | -74.62 (-83.28 to -33.39)           |
| Algeria             | 5982 (5169 to 6928)    | 16875 (13593 to 20871) | 182.11 (149.55 to 221.44)           | 28 (18 to 44)       | 53 (38 to 70)       | 90.14 (11.64 to 209.90)             | 1826 (1320 to 2675) | 4021 (2997 to 5295)   | 120.18 (51.51 to 190.24)            |
| American Samoa      | 2 (2 to 3)             | 3 (3 to 4)             | 48.88 (37.37 to 61.93)              | 0 (0 to 1)          | 0 (0 to 0)          | -37.72 (-65.35 to 47.30)            | 15 (9 to 21)        | 8 (5 to 14)           | -47.39 (-70.61 to 25.25)            |
| Andorra             | 69 (58 to 81)          | 133 (111 to 159)       | 93.79 (79.63 to 110.16)             | 0 (0 to 0)          | 1 (1 to 2)          | 266.11 (124.63 to 467.38)           | 17 (13 to 23)       | 36 (26 to 47)         | 111.42 (66.64 to 167.41)            |
| Angola              | 460 (373 to 573)       | 1648 (1338 to 2017)    | 258.10 (233.16 to 285.26)           | 37 (17 to 76)       | 78 (52 to 117)      | 112.25 (2.89 to 349.24)             | 1913 (713 to 4719)  | 3662 (2249 to 5786)   | 91.46 (-19.81 to 397.70)            |
| Antigua and Barbuda | 17 (14 to 20)          | 34 (28 to 41)          | 102.06 (85.45 to 119.33)            | 1 (0 to 1)          | 1 (0 to 1)          | 17.47 (-15.05 to 92.04)             | 18 (13 to 20)       | 22 (18 to 28)         | 25.07 (-4.44 to 87.07)              |
| Argentina           | 4828 (3926 to 5756)    | 7825 (6413 to 9484)    | 62.10 (49.74 to 73.10)              | 84 (74 to 93)       | 143 (124 to 169)    | 71.49 (45.04 to 102.47)             | 2981 (2577 to 3433) | 4556 (3904 to 5373)   | 52.84 (34.77 to 71.30)              |
| Armenia             | 2547 (2109 to 3013)    | 3263 (2744 to 3956)    | 28.11 (18.76 to 37.72)              | 7 (5 to 9)          | 11 (8 to 13)        | 51.30 (17.69 to 101.11)             | 637 (492 to 805)    | 764 (593 to 979)      | 19.86 (4.07 to 38.21)               |
| Australia           | 18262 (15282 to 21523) | 44624 (39169 to 50438) | 144.35 (122.23 to 167.82)           | 97 (85 to 120)      | 369 (259 to 430)    | 279.18 (123.37 to 350.95)           | 4536 (3533 to 5743) | 11569 (9111 to 14334) | 155.05 (104.34 to 184.94)           |
| Austria             | 25345 (22242 to 28177) | 33080 (29600 to 37293) | 30.52 (19.87 to 42.12)              | 99 (88 to 133)      | 101 (80 to 165)     | 2.52 (-14.48 to 30.58)              | 5699 (4484 to 7140) | 6463 (4736 to 8366)   | 13.41 (1.99 to 27.18)               |
| Azerbaijan          | 4623 (3817 to 5491)    | 9463 (7886 to 11458)   | 104.71 (89.06 to 120.81)            | 12 (9 to 15)        | 13 (10 to 18)       | 12.27 (-26.26 to 63.36)             | 1080 (815 to 1410)  | 1829 (1289 to 2470)   | 69.47 (44.70 to 98.86)              |
| Bahamas             | 65 (55 to 77)          | 123 (102 to 152)       | 88.60 (70.75 to 107.18)             | 1 (1 to 1)          | 2 (1 to 2)          | 82.56 (39.32 to 142.99)             | 49 (41 to 57)       | 78 (63 to 98)         | 60.27 (27.44 to 102.98)             |
| Bahrain             | 179 (152 to 212)       | 846 (688 to 1004)      | 373.26 (300.00 to 446.52)           | 0 (0 to 1)          | 1 (1 to 2)          | 178.61 (100.00 to 257.22)           | 44 (32 to 56)       | 167 (116 to 218)      | 283.01 (150.00 to 416.02)           |

|    |                |             |              |               |              |              |              |              |              |              |
|----|----------------|-------------|--------------|---------------|--------------|--------------|--------------|--------------|--------------|--------------|
| 1  |                |             |              |               |              |              |              |              |              |              |
| 2  |                |             |              |               |              |              |              |              |              |              |
| 3  |                | 206)        | 1035)        | (309.51 to    |              | (82.33 to    | 57)          | 229)         | (204.71 to   |              |
| 4  |                |             |              | 442.36)       |              | 326.1)       |              |              | 374.48)      |              |
| 5  |                |             |              |               |              |              |              |              |              |              |
| 6  |                |             | 33018        | 180.14        | 544 (333 to  | 713 (431 to  | 30.90        | 23781        | 26354        | 10.82        |
| 7  | Bangladesh     | 11786 (9494 | (26285 to    | (157.01 to    | 805)         | 1068)        | (-18.82 to   | (13440 to    | (17363 to    | (-35.76 to   |
| 8  |                | to 14655)   | 41258)       | 203.31)       |              |              | 117.77)      | 35324)       | 37248)       | 104.55)      |
| 9  |                |             |              |               |              |              |              |              |              |              |
| 10 | Barbados       | 183 (153 to | 282 (238 to  | 54.27 (41.76  | 1 (1 to 1)   | 2 (1 to 2)   | 48.15 (12.33 | 58 (47 to    | 81 (62 to    | 39.17 (18.58 |
| 11 |                | 218)        | 340)         | to 69.09)     |              |              | to 96.63)    | 71)          | 101)         | to 61.35)    |
| 12 |                |             |              |               |              |              |              |              |              |              |
| 13 | Belarus        | 9910 (8453  | 11335 (9509  | 14.38 (6.51   | 45 (32 to    | 58 (42 to    | 29.88 (-8.49 | 2690 (2011   | 3063 (2364   | 13.87 (-6.13 |
| 14 |                | to 11723)   | to 13529)    | to 23.58)     | 60)          | 77)          | to 97.40)    | to 3484)     | to 3923)     | to 41.64)    |
| 15 |                |             |              |               |              |              |              |              |              |              |
| 16 | Belgium        | 9661 (8871  | 20093        | 107.97        | 113 (99 to   | 273 (206 to  | 141.39       | 3307 (2755   | 6370 (5236   | 92.63 (55.31 |
| 17 |                | to 10430)   | (17518 to    | (87.58 to     | 134)         | 319)         | (64.63 to    | to 3921)     | to 7678)     | to 116.01)   |
| 18 |                |             | 22821)       | 131.05)       |              |              | 188.06)      |              |              |              |
| 19 |                |             |              | 230.96        |              |              | 117.53       |              |              |              |
| 20 | Belize         | 26 (22 to   | 87 (71 to    | (204.21 to    | 1 (1 to 1)   | 2 (1 to 2)   | (55.55 to    | 40 (29 to    | 77 (64 to    | 91.51 (43.10 |
| 21 |                | 32)         | 106)         | 258.71)       |              |              | 286.06)      | 50)          | 97)          | to 212.80)   |
| 22 |                |             |              |               |              |              |              |              |              |              |
| 23 |                |             |              | 227.98        |              |              | 116.13       |              |              | 107.25       |
| 24 | Benin          | 209 (171 to | 685 (549 to  | (203.9 to     | 14 (6 to 24) | 30 (18 to    | (28.68 to    | 694 (232 to  | 1437 (773 to | (11.24 to    |
| 25 |                | 253)        | 838)         | 255.4)        |              | 44)          | 334.23)      | 1320)        | 2281)        | 374.73)      |
| 26 |                |             |              |               |              |              |              |              |              |              |
| 27 |                |             |              |               |              |              | -15.72       |              |              | -22.33       |
| 28 | Bermuda        | 23 (19 to   | 33 (27 to    | 42.79 (30.81  | 1 (0 to 1)   | 0 (0 to 1)   | (-38.69 to   | 18 (14 to    | 14 (11 to    | (-40.21 to   |
| 29 |                | 28)         | 39)          | to 55.62)     |              |              | 37.20)       | 21)          | 18)          | 11.58)       |
| 30 |                |             |              |               |              |              |              |              |              |              |
| 31 |                |             |              | 140.27        |              |              |              |              |              | 18.91        |
| 32 | Bhutan         | 66 (52 to   | 158 (128 to  | (120.87 to    | 2 (1 to 4)   | 3 (2 to 7)   | 57.00 (-6.75 | 86 (38 to    | 102 (67 to   | (-35.13 to   |
| 33 |                | 83)         | 197)         | 162.46)       |              |              | to 195.84)   | 160)         | 202)         | 133.49)      |
| 34 |                |             |              |               |              |              |              |              |              |              |
| 35 | Bolivia        |             |              | 145.90        |              |              | 39.57        |              |              | -13.09       |
| 36 | (Plurinational | 569 (473 to | 1400 (1171   | (129.42 to    | 25 (10 to    | 34 (26 to    | (-28.99 to   | 1552 (546 to | 1348 (986 to | (-59.56 to   |
| 37 | State of)      | 694)        | to 1693)     | 165.45)       | 48)          | 45)          | 217.03)      | 3375)        | 1772)        | 134.61)      |
| 38 |                |             |              |               |              |              |              |              |              |              |
| 39 | Bosnia and     | 4910 (4225  | 5387 (4726   | 9.73 (1.15 to | 18 (12 to    | 26 (13 to    | 40.25        | 1285 (987 to | 1372 (949 to | 6.80 (-13.90 |
| 40 | Herzegovina    | to 5717)    | to 6247)     | 17.87)        | 23)          | 35)          | (-11.49 to   | 1644)        | 1778)        | to 28.67)    |
| 41 |                |             |              |               |              |              | 108.03)      |              |              |              |
| 42 |                |             |              | 214.79        |              |              | 104.82       |              |              | 106.67       |
| 43 | Botswana       | 70 (58 to   | 221 (179 to  | (189.25 to    | 4 (3 to 6)   | 9 (6 to 13)  | (14.62 to    | 188 (121 to  | 388 (241 to  | (18.10 to    |
| 44 |                | 86)         | 276)         | 244.24)       |              |              | 221.73)      | 269)         | 620)         | 226.68)      |
| 45 |                |             |              |               |              |              |              |              |              |              |
| 46 |                | 73860       | 115697       |               |              |              | 129.44       | 27396        | 46350        |              |
| 47 | Brazil         | (64511 to   | (100339 to   | 56.64 (51.18  | 451 (396 to  | 1035 (939 to | (108.60 to   | (23325 to    | (39647 to    | 69.18 (58.65 |
| 48 |                | 84264)      | 132222)      | to 62.94)     | 488)         | 1207)        | 167.01)      | 31992)       | 54190)       | to 83.50)    |
| 49 |                |             |              |               |              |              |              |              |              |              |
| 50 |                |             |              | 134.79        |              |              | 127.20       |              |              |              |
| 51 | Brunei         | 126 (100 to | 295 (237 to  | (114.54 to    | 1 (1 to 2)   | 3 (2 to 3)   | (58.12 to    | 57 (40 to    | 114 (89 to   | 99.44 (53.62 |
| 52 | Darussalam     | 155)        | 361)         | 156.55)       |              |              | 237.13)      | 85)          | 147)         | to 164.86)   |
| 53 |                |             |              |               |              |              |              |              |              |              |
| 54 |                | 13507       |              | -16.53        |              |              |              |              |              | -7.55        |
| 55 | Bulgaria       | (11443 to   | 11275 (9602  | (-23.08 to    | 25 (22 to    | 41 (32 to    | 65.55 (22.25 | 2779 (2081   | 2569 (1937   | (-19.78 to   |
| 56 |                | 15898)      | to 13477)    | -9.27)        | 32)          | 51)          | to 118.70)   | to 3597)     | to 3319)     | 6.98)        |
| 57 |                |             |              |               |              |              |              |              |              |              |
| 58 | Burkina Faso   | 392 (318 to | 1098 (901 to | 180.10        | 35 (16 to    | 81 (41 to    | 130.36       | 1781 (607 to | 3942 (1729   | 121.28       |
| 59 |                | 485)        | 1347)        | (158.26 to    | 58)          | 129)         | (25.65 to    | 3594)        | to 7006)     | (15.32 to    |
| 60 |                |             |              |               |              |              |              |              |              |              |

|    |                 |             |             |              |              |              |              |              |              |              |
|----|-----------------|-------------|-------------|--------------|--------------|--------------|--------------|--------------|--------------|--------------|
| 1  |                 |             |             |              |              |              |              |              |              |              |
| 2  |                 |             |             |              |              |              |              |              |              |              |
| 3  |                 |             |             | 200.27)      |              |              | 350.02)      |              |              | 380.59)      |
| 4  |                 |             |             | 121.41       |              |              |              |              |              | 51.13        |
| 5  |                 | 207 (169 to | 459 (369 to | (105.47 to   | 21 (13 to    | 38 (24 to    | 76.44 (-8.52 | 1064 (461 to | 1608 (1001   | (-33.49 to   |
| 6  | Burundi         | 255)        | 561)        | 137.36)      | 37)          | 58)          | to 253.21)   | 2387)        | to 2527)     | 272.32)      |
| 7  |                 |             |             |              |              |              |              |              |              |              |
| 8  |                 |             |             | 176.77       |              |              | 37.26        |              |              | 28.23        |
| 9  |                 | 23 (19 to   | 63 (51 to   | (156.29 to   | 1 (0 to 1)   | 1 (1 to 1)   | (-16.62 to   | 34 (21 to    | 43 (35 to    | (-15.29 to   |
| 10 | Cabo Verde      | 28)         | 78)         | 198.45)      |              |              | 131.63)      | 47)          | 54)          | 118.40)      |
| 11 |                 |             |             |              |              |              |              |              |              |              |
| 12 |                 |             |             | 172.54       |              |              | 46.42 (-4.73 | 1175 (547 to | 1222 (890 to | 3.97 (-44.25 |
| 13 | Cambodia        | 218 (168 to | 595 (467 to | (148.48 to   | 26 (14 to    | 38 (26 to    | to 167.94)   | 2166)        | 1546)        | to 128.29)   |
| 14 |                 | 273)        | 730)        | 197.52)      | 39)          | 48)          |              |              |              |              |
| 15 |                 |             |             | 259.93       |              |              | 95.05 (-1.81 | 1367 (583 to | 2830 (1520   | 107.06       |
| 16 |                 |             |             | (232.74 to   | 30 (14 to    | 58 (30 to    | to 218.33)   | 2134)        | to 4639)     | (11.41 to    |
| 17 | Cameroon        | 538 (438 to | 1938 (1576  | 288.04)      | 46)          | 95)          |              |              |              | 245.01)      |
| 18 |                 | 666)        | to 2393)    |              |              |              |              |              |              |              |
| 19 |                 | 116922      | 157737      | 34.91 (23.15 | 270 (241 to  | 403 (323 to  | 49.15 (24.68 | 22694        | 29915        | 31.82 (19.21 |
| 20 | Canada          | (112352 to  | (142113 to  | to 47.18)    | 302)         | 605)         | to 106.93)   | (17260 to    | (21904 to    | to 46.22)    |
| 21 |                 | 121655)     | 173888)     |              |              |              |              | 29101)       | 38441)       |              |
| 22 |                 |             |             | 109.71       |              |              |              |              |              |              |
| 23 | Central African | 116 (95 to  | 243 (199 to | (91.54 to    | 12 (7 to 19) | 21 (12 to    | 80.23 (18.71 | 510 (273 to  | 890 (475 to  | 74.48 (9.24  |
| 24 | Republic        | 145)        | 299)        | 126.84)      |              | 35)          | to 166.11)   | 935)         | 1568)        | to 167.75)   |
| 25 |                 |             |             | 184.44       |              |              | 108.90       |              |              | 117.09       |
| 26 | Chad            | 251 (205 to | 713 (580 to | (162.13 to   | 21 (10 to    | 44 (25 to    | (42.17 to    | 960 (360 to  | 2084 (1020   | (31.20 to    |
| 27 |                 | 306)        | 881)        | 208.28)      | 35)          | 64)          | 222.10)      | 1689)        | to 3460)     | 260.72)      |
| 28 |                 |             |             | 80.06 (68.43 | 46 (36 to    | 70 (59 to    | 53.60 (25.60 | 1928 (1573   | 2612 (2169   | 35.45 (14.76 |
| 29 | Chile           | 3739 (3165  | 6732 (5813  | to 93.27)    | 51)          | 89)          | to 123.36)   | to 2244)     | to 3169)     | to 72.90)    |
| 30 |                 | to 4369)    | to 7788)    |              |              |              |              |              |              |              |
| 31 |                 | 239473      | 911045      | 280.44       |              |              | -15.89       | 234245       | 232464       | -0.76        |
| 32 | China           | (198363 to  | (776347 to  | (262.77 to   | 5560 (4048   | 4676 (3774   | (-39.57 to   | (162916 to   | (179903 to   | (-26.71 to   |
| 33 |                 | 285024)     | 1069533)    | 303.34)      | to 7203)     | to 5461)     | 19.52)       | 293663)      | 291090)      | 54.23)       |
| 34 |                 |             |             | 15348        |              |              | 175.73       |              |              |              |
| 35 | Colombia        | 6732 (5626  | 15348       | (113.25 to   | 56 (48 to    | 154 (116 to  | (106.78 to   | 3215 (2689   | 6419 (4991   | 99.66 (64.35 |
| 36 |                 | to 7997)    | (13025 to   | 144.58)      | 61)          | 202)         | 258.47)      | to 3798)     | to 7986)     | to 143.95)   |
| 37 |                 |             | 18234)      |              |              |              |              |              |              |              |
| 38 |                 |             |             | 123.01       |              |              | 81.66 (13.33 | 77 (29 to    | 119 (75 to   | 54.58        |
| 39 | Comoros         | 21 (17 to   | 48 (39 to   | (106.31 to   | 2 (1 to 3)   | 4 (2 to 6)   | to 277.77)   | 137)         | 174)         | (-16.19 to   |
| 40 |                 | 26)         | 60)         | 142.32)      |              |              |              |              |              | 298.98)      |
| 41 |                 |             |             | 189.59       |              |              | 87.61 (15.68 | 396 (237 to  | 681 (463 to  | 72.21 (-4.05 |
| 42 | Congo           | 145 (120 to | 421 (343 to | (170.45 to   | 9 (6 to 14)  | 17 (12 to    | to 196.61)   | 645)         | 980)         | to 195.14)   |
| 43 |                 | 178)        | 518)        | 215.68)      |              |              |              |              |              |              |
| 44 |                 |             |             | 28.57 (18.27 |              |              | -14.75       |              |              | -33.66       |
| 45 | Cook Islands    | 1 (1 to 1)  | 1 (1 to 2)  | to 40.87)    | 0 (0 to 0)   | 0 (0 to 0)   | (-42.49 to   | 8 (5 to 11)  | 5 (3 to 7)   | (-57.85 to   |
| 46 |                 |             |             |              |              |              | 32.51)       |              |              | 4.48)        |
| 47 |                 |             |             | 144.55       |              |              | 270.81       |              |              |              |
| 48 | Costa Rica      | 670 (560 to | 1637 (1380  | (127.55 to   | 3 (2 to 3)   | 10 (7 to 13) | (169.90 to   | 190 (150 to  | 524 (399 to  | 176.16 (128  |
| 49 |                 | 796)        | to 1937)    | 162.48)      |              |              | 398.49)      | 238)         | 669)         | to 235.84)   |
| 50 |                 |             |             | 170.18       |              |              | 111.95       |              |              |              |
| 51 | Côte d'Ivoire   | 578 (465 to | 1562 (1251  | (151.08 to   | 25 (11 to    | 54 (32 to    | (32.09 to    | 1324 (535 to | 2583 (1501   | 95.11 (14.75 |
| 52 |                 | 714)        | to 1950)    |              | 42)          | 79)          | 2260)        | to 3952)     |              | to 276.09)   |
| 53 |                 |             |             |              |              |              |              |              |              |              |
| 54 |                 |             |             |              |              |              |              |              |              |              |
| 55 |                 |             |             |              |              |              |              |              |              |              |
| 56 |                 |             |             |              |              |              |              |              |              |              |
| 57 |                 |             |             |              |              |              |              |              |              |              |
| 58 |                 |             |             |              |              |              |              |              |              |              |
| 59 |                 |             |             |              |              |              |              |              |              |              |
| 60 |                 |             |             |              |              |              |              |              |              |              |

|    |                 |                        |                        |                           |                 |                  |                          |                      |                       |                          |
|----|-----------------|------------------------|------------------------|---------------------------|-----------------|------------------|--------------------------|----------------------|-----------------------|--------------------------|
| 1  |                 |                        |                        |                           |                 |                  |                          |                      |                       |                          |
| 2  |                 |                        |                        |                           |                 |                  |                          |                      |                       |                          |
| 3  |                 |                        |                        |                           |                 |                  |                          |                      |                       |                          |
| 4  |                 |                        |                        | 190.01)                   |                 |                  |                          |                      |                       | 290.61)                  |
| 5  |                 |                        |                        |                           |                 |                  | 106.49                   |                      |                       |                          |
| 6  | Croatia         | 9449 (8823 to 10129)   | 10780 (9980 to 11592)  | 14.09 (9.79 to 18.67)     | 16 (14 to 24)   | 33 (25 to 42)    | (18.11 to 180.74)        | 1866 (1411 to 2410)  | 2288 (1717 to 2898)   | 22.61 (2.99 to 39.06)    |
| 7  |                 |                        |                        |                           |                 |                  |                          |                      |                       |                          |
| 8  |                 |                        |                        |                           |                 |                  |                          |                      |                       |                          |
| 9  |                 |                        |                        |                           |                 |                  | 16.33                    |                      |                       |                          |
| 10 | Cuba            | 3240 (2702 to 3901)    | 4574 (3750 to 5525)    | 41.18 (29.72 to 54.70)    | 36 (23 to 43)   | 42 (33 to 53)    | (-11.71 to 79.06)        | 1518 (1151 to 1818)  | 1682 (1335 to 2085)   | 10.76 (-8.18 to 38.33)   |
| 11 |                 |                        |                        |                           |                 |                  |                          |                      |                       |                          |
| 12 |                 |                        |                        |                           |                 |                  |                          |                      |                       |                          |
| 13 |                 |                        |                        | 179.86                    |                 |                  |                          |                      |                       |                          |
| 14 | Cyprus          | 344 (292 to 400)       | 962 (870 to 1050)      | (151.26 to 216.30)        | 12 (7 to 16)    | 16 (12 to 20)    | 35.72 (-8.18 to 121.22)  | 257 (180 to 333)     | 370 (303 to 444)      | 43.92 (7.35 to 105.55)   |
| 15 |                 |                        |                        |                           |                 |                  |                          |                      |                       |                          |
| 16 |                 |                        |                        |                           |                 |                  |                          |                      |                       |                          |
| 17 |                 |                        |                        | 20802                     |                 |                  |                          |                      |                       |                          |
| 18 | Czechia         | 10218 (8616 to 12269)  | (19084 to 22519)       | 103.57 (74.68 to 138.01)  | 71 (64 to 82)   | 114 (87 to 141)  | 59.45 (13.25 to 100.62)  | 3246 (2697 to 3932)  | 5259 (4127 to 6597)   | 62.01 (34.95 to 90.03)   |
| 19 |                 |                        |                        |                           |                 |                  |                          |                      |                       |                          |
| 20 | Democratic      |                        |                        |                           |                 |                  |                          |                      |                       |                          |
| 21 | People's        |                        |                        |                           |                 |                  |                          |                      |                       |                          |
| 22 | Republic of     | 3097 (2554 to 3714)    | 4965 (4120 to 5978)    | 60.33 (48.19 to 72.89)    | 74 (41 to 114)  | 108 (75 to 147)  | 45.76 (-9.28 to 166.1)   | 3363 (1697 to 6033)  | 3161 (2323 to 4117)   | -5.99 (-46.37 to 81.39)  |
| 23 | Korea           |                        |                        |                           |                 |                  |                          |                      |                       |                          |
| 24 |                 |                        |                        |                           |                 |                  |                          |                      |                       |                          |
| 25 | Democratic      |                        |                        |                           |                 |                  |                          |                      |                       |                          |
| 26 | Republic of the | 1975 (1605 to 2418)    | 4445 (3597 to 5502)    | 125.06 (107.08 to 145.69) | 130 (79 to 207) | 231 (159 to 336) | 77.23 (4.65 to 194.58)   | 6456 (3284 to 12595) | 10018 (6738 to 15367) | 55.18 (-21.39 to 209.02) |
| 27 | Congo           |                        |                        |                           |                 |                  |                          |                      |                       |                          |
| 28 |                 |                        |                        |                           |                 |                  |                          |                      |                       |                          |
| 29 |                 |                        |                        |                           |                 |                  |                          |                      |                       |                          |
| 30 | Denmark         | 13729 (12468 to 15154) | 15310 (13920 to 16882) | 11.51 (5.37 to 17.43)     | 43 (38 to 50)   | 70 (60 to 83)    | 65.35 (42.63 to 92.58)   | 2893 (2227 to 3654)  | 3391 (2644 to 4239)   | 17.21 (8.04 to 27.16)    |
| 31 |                 |                        |                        |                           |                 |                  |                          |                      |                       |                          |
| 32 |                 |                        |                        |                           |                 |                  |                          |                      |                       |                          |
| 33 |                 |                        |                        | 342.41                    |                 |                  |                          |                      |                       |                          |
| 34 | Djibouti        | 20 (16 to 25)          | 90 (72 to 111)         | (307.26 to 378.51)        | 1 (1 to 2)      | 3 (2 to 5)       | 190.20 (72.46 to 408.23) | 60 (27 to 121)       | 144 (88 to 236)       | 138.93 (25.91 to 367.14) |
| 35 |                 |                        |                        |                           |                 |                  |                          |                      |                       |                          |
| 36 |                 |                        |                        |                           |                 |                  |                          |                      |                       |                          |
| 37 |                 |                        |                        |                           |                 |                  |                          |                      |                       |                          |
| 38 | Dominica        | 19 (16 to 23)          | 22 (18 to 27)          | 17.43 (7.09 to 28.52)     | 1 (1 to 1)      | 1 (0 to 1)       | -9.08 (-35.39 to 27.05)  | 23 (19 to 28)        | 21 (16 to 27)         | -11.16 (-34.54 to 19.86) |
| 39 |                 |                        |                        |                           |                 |                  |                          |                      |                       |                          |
| 40 |                 |                        |                        |                           |                 |                  |                          |                      |                       |                          |
| 41 |                 |                        |                        |                           |                 |                  |                          |                      |                       |                          |
| 42 | Dominican       | 1239 (1022 to 1507)    | 2521 (2070 to 3084)    | 103.40 (87.28 to 121.86)  | 11 (9 to 16)    | 22 (16 to 30)    | 99.41 (29.65 to 202.38)  | 732 (527 to 1060)    | 1109 (821 to 1450)    | 51.44 (0.42 to 118.17)   |
| 43 | Republic        |                        |                        |                           |                 |                  |                          |                      |                       |                          |
| 44 |                 |                        |                        |                           |                 |                  |                          |                      |                       |                          |
| 45 |                 |                        |                        |                           |                 |                  |                          |                      |                       |                          |
| 46 | Ecuador         | 1159 (1021 to 1302)    | 3315 (2981 to 3667)    | 186.04 (172.00 to 200.27) | 16 (12 to 21)   | 34 (24 to 44)    | 107.95 (37.86 to 223.02) | 982 (705 to 1302)    | 1475 (1120 to 1823)   | 50.25 (3.59 to 124.68)   |
| 47 |                 |                        |                        |                           |                 |                  |                          |                      |                       |                          |
| 48 |                 |                        |                        |                           |                 |                  |                          |                      |                       |                          |
| 49 |                 |                        |                        |                           |                 |                  |                          |                      |                       |                          |
| 50 | Egypt           | 17107 (14592 to 19726) | 39271 (31782 to 48388) | 129.56 (97.49 to 159.21)  | 59 (35 to 119)  | 119 (70 to 186)  | 100.85 (5.49 to 238.69)  | 4521 (3160 to 6354)  | 9453 (6709 to 12613)  | 109.10 (57.59 to 171.14) |
| 51 |                 |                        |                        |                           |                 |                  |                          |                      |                       |                          |
| 52 |                 |                        |                        |                           |                 |                  |                          |                      |                       |                          |
| 53 |                 |                        |                        |                           |                 |                  |                          |                      |                       |                          |
| 54 | El Salvador     | 842 (701 to 998)       | 1478 (1239 to 1741)    | 75.42 (62.88 to 87.97)    | 13 (8 to 16)    | 9 (7 to 12)      | -28.67 (-54.13 to 18.21) | 661 (461 to 881)     | 437 (329 to 574)      | -33.83 (-55.24 to -1.58) |
| 55 |                 |                        |                        |                           |                 |                  |                          |                      |                       |                          |
| 56 |                 |                        |                        |                           |                 |                  |                          |                      |                       |                          |
| 57 | Equatorial      | 19 (16 to 24)          | 95 (79 to 117)         | 397.19 (353.40 to 443.01) | 2 (1 to 3)      | 3 (2 to 4)       | 66.29 (-6.86 to 195.01)  | 73 (37 to 135)       | 119 (73 to 184)       | 63.28 (-22.44 to 233.97) |
| 58 | Guinea          |                        |                        |                           |                 |                  |                          |                      |                       |                          |
| 59 |                 |                        |                        |                           |                 |                  |                          |                      |                       |                          |
| 60 |                 |                        |                        |                           |                 |                  |                          |                      |                       |                          |



|    |           |             |             |              |              |             |              |              |              |              |
|----|-----------|-------------|-------------|--------------|--------------|-------------|--------------|--------------|--------------|--------------|
| 1  |           |             |             |              |              |             |              |              |              |              |
| 2  |           |             |             |              |              |             |              |              |              |              |
| 3  |           |             | 186.49      |              |              | 165.47      |              |              | 114.61       |              |
| 4  | Eritrea   | 114 (93 to  | 327 (263 to | (164.83 to   | 9 (4 to 17)  | 23 (15 to   | (22.99 to    | 474 (168 to  | 1017 (645 to | (-12.62 to   |
| 5  |           | 141)        | 398)        | 210.17)      |              | 34)         | 516.12)      | 1107)        | 1643)        | 493.09)      |
| 6  |           |             |             |              |              |             |              |              |              |              |
| 7  |           |             |             |              |              |             | -17.88       |              |              | -12.32       |
| 8  | Estonia   | 1311 (1148  | 1821 (1593  | 38.90 (26.62 | 10 (9 to 12) | 9 (6 to 11) | (-40.41 to   | 511 (425 to  | 448 (341 to  | (-28.71 to   |
| 9  |           | to 1494)    | to 2066)    | to 51.17)    |              |             | 15.88)       | 601)         | 573)         | 9.89)        |
| 10 |           |             |             |              |              |             |              |              |              |              |
| 11 |           |             |             | 109.48       |              |             |              |              |              | 44.21        |
| 12 | Eswatini  | 38 (31 to   | 80 (65 to   | (95.32 to    | 2 (1 to 3)   | 4 (2 to 5)  | 72.30 (1.22  | 106 (47 to   | 153 (101 to  | (-27.03 to   |
| 13 |           | 47)         | 98)         | 125.52)      |              |             | to 254.21)   | 206)         | 227)         | 242.69)      |
| 14 |           |             |             |              |              |             |              |              |              |              |
| 15 |           |             |             | 152.76       |              |             |              |              |              | 13.90        |
| 16 | Ethiopia  | 1763 (1447  | 4457 (3634  | (143.58 to   | 219 (128 to  | 325 (197 to | (-33.27 to   | 11296 (4911  | 12866 (8426  | (-51.97 to   |
| 17 |           | to 2135)    | to 5454)    | 162.31)      | 398)         | 489)        | 200.06)      | to 25054)    | to 19913)    | 197.17)      |
| 18 |           |             |             |              |              |             |              |              |              |              |
| 19 |           |             |             |              |              |             | 27.79        |              |              | 14.67        |
| 20 | Fiji      | 28 (23 to   | 42 (35 to   | 50.29 (36.12 | 1 (1 to 2)   | 2 (1 to 2)  | (-16.31 to   | 59 (45 to    | 68 (49 to    | (-24.77 to   |
| 21 |           | 34)         | 52)         | to 66.63)    |              |             | 91.11)       | 80)          | 91)          | 72.54)       |
| 22 |           |             |             |              |              |             |              |              |              |              |
| 23 |           |             | 19960       | 111.22       |              |             |              |              |              |              |
| 24 | Finland   | 9450 (8777  | (17972 to   | (94.08 to    | 33 (24 to    | 39 (33 to   | 18.82 (-5.40 | 2012 (1537   | 3465 (2517   | 72.24 (51.93 |
| 25 |           | to 10150)   | 22078)      | 127.73)      | 39)          | 46)         | to 68.55)    | to 2571)     | to 4569)     | to 93.91)    |
| 26 |           |             |             |              |              |             |              |              |              |              |
| 27 |           | 60982       | 101092      | 65.77 (54.06 | 943 (807 to  | 2181 (1253  | 131.25       | 23073        | 40856        | 77.07 (34.58 |
| 28 | France    | (55563 to   | (91225 to   | to 77.24)    | 1043)        | to 2615)    | (51.63 to    | (19741 to    | (30081 to    | to 97.82)    |
| 29 |           | 66348)      | 111418)     |              |              |             | 168.76)      | 26699)       | 48291)       |              |
| 30 |           |             |             |              |              |             |              |              |              |              |
| 31 |           |             |             | 150.81       |              |             |              |              |              | 42.02        |
| 32 | Gabon     | 65 (54 to   | 163 (134 to | (132.67 to   | 4 (2 to 6)   | 5 (4 to 8)  | 52.52 (-4.74 | 144 (85 to   | 205 (137 to  | (-13.99 to   |
| 33 |           | 80)         | 201)        | 173.19)      |              |             | to 134.04)   | 223)         | 294)         | 140.73)      |
| 34 |           |             |             |              |              |             |              |              |              |              |
| 35 |           |             |             | 162.91       |              |             |              |              |              |              |
| 36 | Gambia    | 49 (39 to   | 130 (105 to | (142.17 to   | 3 (1 to 5)   | 5 (3 to 7)  | 85.18 (3.78  | 132 (63 to   | 215 (140 to  | 62.69 (-6.86 |
| 37 |           | 60)         | 161)        | 186.15)      |              |             | to 214.51)   | 243)         | 298)         | to 192.83)   |
| 38 |           |             |             |              |              |             |              |              |              |              |
| 39 |           |             |             | -17.45       |              |             |              |              |              | -18.96       |
| 40 | Georgia   | 5100 (4308  | 4210 (3545  | (-22.85 to   | 16 (10 to    | 17 (10 to   | 3.41 (-22.82 | 1222 (911 to | 991 (741 to  | (-30.33 to   |
| 41 |           | to 6037)    | to 5060)    | -11.71)      | 22)          | 22)         | to 40.33)    | 1581)        | 1269)        | -5.81)       |
| 42 |           |             |             |              |              |             |              |              |              |              |
| 43 |           | 101153      | 236048      | 133.36       | 1201 (987 to | 4286 (3156  | 256.72       | 37493        | 92002        | 145.38       |
| 44 | Germany   | (87240 to   | (208508 to  | (115.87 to   | 2011)        | to 4903)    | (63.30 to    | (30500 to    | (74718 to    | (51.12 to    |
| 45 |           | 117946)     | 266966)     | 150.36)      |              |             | 351.66)      | 51704)       | 107721)      | 187.04)      |
| 46 |           |             |             |              |              |             |              |              |              |              |
| 47 |           |             |             | 194.61       |              |             |              |              |              |              |
| 48 | Ghana     | 982 (800 to | 2894 (2355  | (176.45 to   | 56 (24 to    | 103 (57 to  | 84.24 (5.66  | 2633 (1097   | 4506 (2554   | 71.16 (2.12  |
| 49 |           | 1189)       | to 3533)    | 216.26)      | 95)          | 155)        | to 242.87)   | to 4201)     | to 6654)     | to 227.26)   |
| 50 |           |             |             |              |              |             |              |              |              |              |
| 51 |           | 12180       | 10403 (9422 | -14.59       |              |             |              |              |              |              |
| 52 | Greece    | (10236 to   | to 11537)   | (-23.98 to   | 35 (30 to    | 66 (54 to   | 86.77 (51.57 | 2407 (1790   | 2424 (1911   | 0.69 (-13.02 |
| 53 |           | 14240)      |             | -3.38)       | 40)          | 80)         | to 131.14)   | to 3170)     | to 3027)     | to 15.85)    |
| 54 |           |             |             |              |              |             |              |              |              |              |
| 55 | Greenland | 78 (64 to   | 108 (92 to  | 39.24 (25.78 | 0 (0 to 0)   | 0 (0 to 1)  | 147.84       | 17 (13 to    | 25 (19 to    | 49.12 (13.65 |
| 56 |           | 92)         | 125)        | to 55.52)    |              |             | (18.45 to    | 23)          | 33)          | to 82.39)    |
| 57 |           |             |             |              |              |             |              |              |              |              |
| 58 |           |             |             |              |              |             |              |              |              |              |
| 59 | Grenada   | 16 (13 to   | 28 (23 to   | 76.27 (60.87 | 1 (1 to 1)   | 1 (1 to 2)  | 29.20 (-4.73 | 33 (27 to    | 43 (36 to    | 30.86 (1.58  |
| 60 |           | 19)         | 35)         | to 93.49)    |              |             | to 79.53)    | 39)          | 52)          | to 68.87)    |

|    |                            |                           |                           |                           |                     |                     |                          |                          |                           |                          |
|----|----------------------------|---------------------------|---------------------------|---------------------------|---------------------|---------------------|--------------------------|--------------------------|---------------------------|--------------------------|
| 1  |                            |                           |                           |                           |                     |                     | 21.60                    |                          |                           |                          |
| 2  |                            |                           |                           |                           |                     |                     |                          |                          |                           |                          |
| 3  |                            |                           |                           |                           |                     |                     |                          |                          |                           |                          |
| 4  | Guam                       | 8 (6 to 9)                | 12 (10 to 14)             | 49.19 (36.21 to 64.35)    | 0 (0 to 0)          | 0 (0 to 0)          | (-20.17 to 84.57)        | 9 (7 to 12)              | 9 (7 to 13)               | 2.91 (-31.52 to 53.3)    |
| 5  |                            |                           |                           |                           |                     |                     |                          |                          |                           |                          |
| 6  |                            |                           |                           |                           |                     |                     |                          |                          |                           |                          |
| 7  |                            |                           |                           |                           |                     |                     |                          |                          |                           |                          |
| 8  | Guatemala                  | 1041 (867 to 1243)        | 3192 (2680 to 3791)       | 206.76 (185.26 to 227.66) | 13 (8 to 22)        | 35 (27 to 45)       | 180.16 (34.43 to 377.94) | 866 (522 to 1506)        | 1761 (1381 to 2210)       | 103.35 (6.31 to 246.71)  |
| 9  |                            |                           |                           |                           |                     |                     |                          |                          |                           |                          |
| 10 |                            |                           |                           |                           |                     |                     |                          |                          |                           |                          |
| 11 |                            |                           |                           |                           |                     |                     |                          |                          |                           |                          |
| 12 | Guinea                     | 309 (251 to 384)          | 677 (543 to 826)          | 119.23 (103.12 to 138.21) | 19 (6 to 34)        | 29 (14 to 46)       | 49.62 (-7.31 to 159.78)  | 1008 (272 to 2032)       | 1414 (609 to 2445)        | 40.38 (-20.12 to 170.29) |
| 13 |                            |                           |                           |                           |                     |                     |                          |                          |                           |                          |
| 14 |                            |                           |                           |                           |                     |                     |                          |                          |                           |                          |
| 15 |                            |                           |                           |                           |                     |                     |                          |                          |                           |                          |
| 16 | Guinea-Bissau              | 44 (36 to 54)             | 103 (83 to 126)           | 134.63 (116.21 to 153.25) | 4 (2 to 7)          | 6 (3 to 8)          | 39.91 (-18.84 to 175.43) | 201 (66 to 403)          | 265 (152 to 392)          | 31.85 (-30.36 to 186.15) |
| 17 |                            |                           |                           |                           |                     |                     |                          |                          |                           |                          |
| 18 |                            |                           |                           |                           |                     |                     |                          |                          |                           |                          |
| 19 |                            |                           |                           |                           |                     |                     |                          |                          |                           |                          |
| 20 | Guyana                     | 126 (103 to 152)          | 170 (139 to 210)          | 35.00 (24.45 to 45.80)    | 5 (4 to 6)          | 6 (5 to 9)          | 20.04 (-18.42 to 74.53)  | 239 (189 to 291)         | 257 (191 to 336)          | 7.22 (-25.07 to 53.03)   |
| 21 |                            |                           |                           |                           |                     |                     |                          |                          |                           |                          |
| 22 |                            |                           |                           |                           |                     |                     |                          |                          |                           |                          |
| 23 |                            |                           |                           |                           |                     |                     |                          |                          |                           |                          |
| 24 | Haiti                      | 860 (708 to 1057)         | 1916 (1570 to 2384)       | 122.68 (105.23 to 142.3)  | 58 (24 to 105)      | 85 (45 to 125)      | 45.78 (-11 to 148.4)     | 3030 (946 to 6879)       | 3782 (1875 to 6104)       | 24.85 (-33.53 to 156.75) |
| 25 |                            |                           |                           |                           |                     |                     |                          |                          |                           |                          |
| 26 |                            |                           |                           |                           |                     |                     |                          |                          |                           |                          |
| 27 |                            |                           |                           |                           |                     |                     |                          |                          |                           |                          |
| 28 | Honduras                   | 619 (513 to 734)          | 1803 (1499 to 2141)       | 191.20 (171.74 to 211.20) | 22 (14 to 31)       | 50 (31 to 69)       | 128.99 (47.94 to 251.69) | 1240 (712 to 1929)       | 1816 (1191 to 2508)       | 46.37 (-11.95 to 139.27) |
| 29 |                            |                           |                           |                           |                     |                     |                          |                          |                           |                          |
| 30 |                            |                           |                           |                           |                     |                     |                          |                          |                           |                          |
| 31 |                            |                           |                           |                           |                     |                     |                          |                          |                           |                          |
| 32 | Hungary                    | 24215 (21977 to 26809)    | 42233 (39099 to 45377)    | 74.41 (64.26 to 86.04)    | 84 (76 to 109)      | 100 (80 to 128)     | 19.27 (-4.55 to 45.83)   | 5849 (4647 to 7201)      | 8339 (6257 to 10544)      | 42.56 (25.99 to 56.19)   |
| 33 |                            |                           |                           |                           |                     |                     |                          |                          |                           |                          |
| 34 |                            |                           |                           |                           |                     |                     |                          |                          |                           |                          |
| 35 |                            |                           |                           |                           |                     |                     |                          |                          |                           |                          |
| 36 | Iceland                    | 357 (301 to 420)          | 872 (752 to 1007)         | 144.33 (123.25 to 167.58) | 2 (2 to 2)          | 4 (3 to 5)          | 107.81 (52.43 to 151.5)  | 90 (71 to 113)           | 187 (142 to 239)          | 107.79 (81.26 to 131.98) |
| 37 |                            |                           |                           |                           |                     |                     |                          |                          |                           |                          |
| 38 |                            |                           |                           |                           |                     |                     |                          |                          |                           |                          |
| 39 | India                      | 133927 (107800 to 166434) | 270719 (219873 to 332264) | 102.14 (95.94 to 110.29)  | 2770 (1783 to 3802) | 4214 (2950 to 5531) | 52.13 (19.29 to 98.65)   | 127568 (77798 to 169843) | 164416 (117527 to 208276) | 28.89 (1.40 to 72.21)    |
| 40 |                            |                           |                           |                           |                     |                     |                          |                          |                           |                          |
| 41 |                            |                           |                           |                           |                     |                     |                          |                          |                           |                          |
| 42 |                            |                           |                           |                           |                     |                     |                          |                          |                           |                          |
| 43 | Indonesia                  | 5025 (3974 to 6141)       | 11410 (9158 to 13704)     | 127.09 (115.15 to 141.04) | 704 (401 to 910)    | 913 (582 to 1179)   | 29.58 (2.63 to 76.95)    | 26026 (16965 to 34445)   | 24943 (18268 to 32252)    | -4.16 (-31.91 to 42.06)  |
| 44 |                            |                           |                           |                           |                     |                     |                          |                          |                           |                          |
| 45 |                            |                           |                           |                           |                     |                     |                          |                          |                           |                          |
| 46 | Iran (Islamic Republic of) | 14964 (12153 to 18513)    | 40493 (32952 to 49751)    | 170.60 (160.28 to 181.00) | 51 (33 to 68)       | 132 (55 to 164)     | 158.02 (43.67 to 247.65) | 4022 (3121 to 5103)      | 9481 (6679 to 12439)      | 135.71 (84.19 to 177.03) |
| 47 |                            |                           |                           |                           |                     |                     |                          |                          |                           |                          |
| 48 |                            |                           |                           |                           |                     |                     |                          |                          |                           |                          |
| 49 |                            |                           |                           |                           |                     |                     |                          |                          |                           |                          |
| 50 |                            |                           |                           |                           |                     |                     |                          |                          |                           |                          |
| 51 | Iraq                       | 2270 (1890 to 2694)       | 10029 (8221 to 12199)     | 341.76 (303.6 to 377.49)  | 34 (21 to 51)       | 51 (38 to 67)       | 52.37 (-14.19 to 162.33) | 2135 (1267 to 3447)      | 3719 (2808 to 4931)       | 74.13 (2.20 to 190.75)   |
| 52 |                            |                           |                           |                           |                     |                     |                          |                          |                           |                          |
| 53 |                            |                           |                           |                           |                     |                     |                          |                          |                           |                          |
| 54 | Ireland                    | 3253 (2736 to 3869)       | 5762 (4988 to 6655)       | 77.13 (58.69 to 97.43)    | 33 (29 to 37)       | 51 (41 to 65)       | 53.61 (25.28 to 93.62)   | 1106 (922 to 1332)       | 1623 (1294 to 2033)       | 46.76 (29.96 to 67.57)   |
| 55 |                            |                           |                           |                           |                     |                     |                          |                          |                           |                          |
| 56 |                            |                           |                           |                           |                     |                     |                          |                          |                           |                          |
| 57 | Israel                     | 3274 (2767 to 3882)       | 6640 (5924 to 7451)       | 102.78 (76.8 to 132.02)   | 22 (18 to 24)       | 46 (38 to 63)       | 111.01 (70.80 to 199.17) | 1000 (812 to 1229)       | 1851 (1484 to 2306)       | 85.14 (61.05 to 116.46)  |
| 58 |                            |                           |                           |                           |                     |                     |                          |                          |                           |                          |
| 59 |                            |                           |                           |                           |                     |                     |                          |                          |                           |                          |
| 60 |                            |                           |                           |                           |                     |                     |                          |                          |                           |                          |

|    |              |             |             |              |              |              |              |              |              |              |
|----|--------------|-------------|-------------|--------------|--------------|--------------|--------------|--------------|--------------|--------------|
| 1  |              |             |             |              |              |              |              |              |              |              |
| 2  |              |             |             |              |              |              |              |              |              |              |
| 3  |              | 183929      | 186447      |              |              |              | 272.23       | 33890        | 44427        |              |
| 4  | Italy        | (159353 to  | (165268 to  | 1.37 (-2.84  | 351 (310 to  | 1305 (944 to | (70.52 to    | (24913 to    | (34629 to    | 31.09 (5.26  |
| 5  |              | 209220)     | 209019)     | to 6.10)     | 581)         | 1468)        | 339.63)      | 43884)       | 54814)       | to 46.90)    |
| 6  |              |             |             |              |              |              |              |              |              |              |
| 7  |              |             |             |              |              |              | 21.88        |              |              | 12.67        |
| 8  | Jamaica      | 543 (455 to | 884 (737 to | 62.81 (49.97 | 6 (4 to 7)   | 7 (5 to 10)  | (-16.58 to   | 304 (231 to  | 343 (264 to  | (-13.90 to   |
| 9  |              | 648)        | 1059)       | to 76.46)    |              |              | 110.45)      | 367)         | 432)         | 66.78)       |
| 10 |              |             |             |              |              |              |              |              |              |              |
| 11 |              | 236120      | 408632      |              |              |              |              | 41769        | 67424        |              |
| 12 | Japan        | (196281 to  | (353858 to  | 73.06 (59.11 | 367 (270 to  | 452 (350 to  | 23.32 (1.39  | (30062 to    | (46877 to    | 61.42 (48.32 |
| 13 |              | 281825)     | 468152)     | to 88.73)    | 394)         | 629)         | to 112.57)   | 56026)       | 91495)       | to 75.54)    |
| 14 |              |             |             |              |              |              |              |              |              |              |
| 15 |              |             |             | 614.12       |              |              | 135.70       |              |              | 376.81       |
| 16 | Jordan       | 1611 (1394  | 11508 (9646 | (540.91 to   | 6 (4 to 8)   | 13 (10 to    | (49.91 to    | 452 (339 to  | 2155 (1536   | (274.79 to   |
| 17 |              | to 1851)    | to 13565)   | 683.77)      |              | 17)          | 281.75)      | 570)         | to 2953)     | 495.45)      |
| 18 |              |             |             |              |              |              |              |              |              |              |
| 19 |              |             | 15823       |              |              |              |              |              |              |              |
| 20 | Kazakhstan   | 11689 (9797 | (13219 to   | 35.36 (26.10 | 76 (56 to    | 82 (66 to    | 7.52 (-17.29 | 4458 (3567   | 5172 (4164   | 16.03 (-1.28 |
| 21 |              | to 14063)   | 18930)      | to 46.10)    | 95)          | 100)         | to 48.48)    | to 5515)     | to 6466)     | to 37.13)    |
| 22 |              |             |             |              |              |              |              |              |              |              |
| 23 |              |             |             | 230.72       |              |              | 144.03       |              |              |              |
| 24 | Kenya        | 868 (711 to | 2870 (2364  | (219.85 to   | 74 (46 to    | 180 (111 to  | (82.74 to    | 3011 (1930   | 6453 (4376   | 114.3 (40.66 |
| 25 |              | 1056)       | to 3474)    | 242.5)       | 125)         | 265)         | 228.15)      | to 4593)     | to 9370)     | to 213.60)   |
| 26 |              |             |             |              |              |              |              |              |              |              |
| 27 | Kiribati     | 2 (2 to 3)  | 4 (3 to 4)  | 60.33 (46.38 | 1 (0 to 1)   | 1 (0 to 1)   | 5.25 (-33.24 | 28 (11 to    | 30 (14 to    | 4.10 (-35.53 |
| 28 |              |             |             | to 76.77)    |              |              | to 73.45)    | 58)          | 55)          | to 92.08)    |
| 29 |              |             |             |              |              |              |              |              |              |              |
| 30 |              |             |             | 230.91       |              |              | 195.71       |              |              | 197.49       |
| 31 | Kuwait       | 863 (798 to | 2857 (2338  | (174.37 to   | 1 (1 to 2)   | 4 (3 to 5)   | (125.48 to   | 188 (140 to  | 558 (391 to  | (143.44 to   |
| 32 |              | 937)        | to 3483)    | 298.63)      |              |              | 314.39)      | 241)         | 755)         | 262.68)      |
| 33 |              |             |             |              |              |              |              |              |              |              |
| 34 |              |             |             |              |              |              | -36.11       |              |              | -7.05        |
| 35 | Kyrgyzstan   | 2526 (2126  | 4283 (3592  | 69.58 (59.46 | 15 (10 to    | 10 (8 to 12) | (-51.26 to   | 1109 (784 to | 1031 (789 to | (-27.91 to   |
| 36 |              | to 3008)    | to 5083)    | to 81.49)    | 19)          |              | 14.99)       | 1376)        | 1325)        | 29.99)       |
| 37 |              |             |             |              |              |              |              |              |              |              |
| 38 | Lao People's | 90 (70 to   | 241 (191 to | 167.27       |              |              | 8.81 (-34.31 | 385 (177 to  | 387 (234 to  | 0.50 (-45.77 |
| 39 | Democratic   | 113)        | 300)        | (144.93 to   | 10 (5 to 15) | 11 (6 to 17) | to 91.32)    | 639)         | 610)         | to 106.92)   |
| 40 | Republic     |             |             | 193.03)      |              |              |              |              |              |              |
| 41 |              |             |             |              |              |              |              |              |              |              |
| 42 | Latvia       | 3273 (2810  | 3226 (2843  | -1.44 (-8.09 | 12 (10 to    | 14 (11 to    | 18.35 (-5.77 | 811 (632 to  | 779 (605 to  | -4.01        |
| 43 |              | to 3770)    | to 3623)    | to 5.70)     | 14)          | 17)          | to 47.79)    | 1017)        | 981)         | (-15.43 to   |
| 44 |              |             |             |              |              |              |              |              |              | 8.10)        |
| 45 |              |             |             | 182.89       |              |              | 146.92       |              |              | 148.06       |
| 46 | Lebanon      | 881 (721 to | 2494 (2037  | (160.10 to   | 3 (2 to 4)   | 8 (4 to 12)  | (25.25 to    | 220 (161 to  | 545 (394 to  | (90.21 to    |
| 47 |              | 1091)       | to 3050)    | 205.97)      |              |              | 359.10)      | 297)         | 737)         | 219.00)      |
| 48 |              |             |             |              |              |              |              |              |              |              |
| 49 |              |             |             |              |              |              | 51.75        |              |              | 46.51        |
| 50 | Lesotho      | 95 (78 to   | 150 (122 to | 58.00 (46.76 | 6 (4 to 8)   | 9 (6 to 12)  | (-12.69 to   | 222 (137 to  | 326 (210 to  | (-15.14 to   |
| 51 |              | 115)        | 185)        | to 69.06)    |              |              | 142.65)      | 323)         | 480)         | 129.83)      |
| 52 |              |             |             |              |              |              |              |              |              |              |
| 53 |              |             |             | 176.51       |              |              | 46.34        |              |              | 35.96        |
| 54 | Liberia      | 104 (85 to  | 288 (233 to | (154.41 to   | 7 (3 to 12)  | 11 (6 to 17) | (-18.23 to   | 360 (108 to  | 490 (271 to  | (-36.97 to   |
| 55 |              | 129)        | 354)        | 199.50)      |              |              | 235.23)      | 705)         | 833)         | 268.26)      |
| 56 |              |             |             |              |              |              |              |              |              |              |
| 57 |              |             |             | 203.80       |              |              | 159.15       |              |              | 160.02       |
| 58 | Libya        | 629 (514 to | 1910 (1557  | (175.90 to   | 4 (3 to 7)   | 11 (7 to 15) | (33.45 to    | 229 (166 to  | 595 (436 to  | (65.02 to    |
| 59 |              | 759)        | to 2333)    | 233.83)      |              |              | 345.08)      | 324)         | 782)         | 262.55)      |
| 60 |              |             |             |              |              |              |              |              |              |              |

|    |                                  |                        |                        |                           |                  |                  |                           |                      |                        |                          |
|----|----------------------------------|------------------------|------------------------|---------------------------|------------------|------------------|---------------------------|----------------------|------------------------|--------------------------|
| 1  |                                  |                        |                        |                           |                  |                  |                           |                      |                        |                          |
| 2  |                                  |                        |                        |                           |                  |                  |                           |                      |                        |                          |
| 3  |                                  |                        |                        |                           |                  |                  |                           |                      |                        |                          |
| 4  | Lithuania                        | 4535 (3980 to 5145)    | 4848 (4481 to 5210)    | 6.90 (-3.51 to 20.95)     | 14 (10 to 16)    | 18 (14 to 23)    | 26.29 (-2.24 to 67.72)    | 1054 (817 to 1321)   | 1105 (861 to 1375)     | 4.77 (-8.66 to 20.85)    |
| 5  |                                  |                        |                        |                           |                  |                  | 124.41                    |                      |                        |                          |
| 6  |                                  |                        |                        |                           |                  |                  |                           |                      |                        |                          |
| 7  | Luxembourg                       | 775 (680 to 879)       | 1503 (1318 to 1707)    | 93.98 (81.65 to 107.23)   | 5 (4 to 6)       | 11 (8 to 13)     | (55.78 to 172.33)         | 202 (162 to 247)     | 376 (297 to 471)       | 85.81 (59.15 to 105.40)  |
| 8  |                                  |                        |                        |                           |                  |                  |                           |                      |                        |                          |
| 9  |                                  |                        |                        |                           |                  |                  |                           |                      |                        |                          |
| 10 |                                  |                        |                        |                           |                  |                  |                           |                      |                        | 60.01                    |
| 11 | Madagascar                       | 490 (401 to 604)       | 1330 (1089 to 1651)    | 171.16 (153.22 to 190.88) | 36 (17 to 60)    | 69 (48 to 103)   | 92.10 (5.72 to 331.04)    | 1875 (646 to 3722)   | 3000 (2035 to 4374)    | (-23.07 to 329.63)       |
| 12 |                                  |                        |                        |                           |                  |                  |                           |                      |                        |                          |
| 13 |                                  |                        |                        |                           |                  |                  |                           |                      |                        |                          |
| 14 |                                  |                        |                        |                           |                  |                  |                           |                      |                        |                          |
| 15 | Malawi                           | 336 (273 to 415)       | 741 (603 to 910)       | 120.33 (105.3 to 136.64)  | 39 (19 to 76)    | 55 (38 to 78)    | 39.48 (-33.91 to 218.89)  | 2236 (716 to 5491)   | 2323 (1541 to 3545)    | 3.89 (-57.34 to 225.03)  |
| 16 |                                  |                        |                        |                           |                  |                  |                           |                      |                        |                          |
| 17 |                                  |                        |                        |                           |                  |                  |                           |                      |                        |                          |
| 18 |                                  |                        |                        |                           |                  |                  |                           |                      |                        |                          |
| 19 | Malaysia                         | 638 (533 to 747)       | 2165 (1879 to 2498)    | 239.19 (213.74 to 272.55) | 16 (13 to 20)    | 41 (30 to 56)    | 157.56 (64.69 to 265.74)  | 612 (503 to 742)     | 1434 (1090 to 1814)    | 134.26 (68.55 to 208.48) |
| 20 |                                  |                        |                        |                           |                  |                  |                           |                      |                        |                          |
| 21 |                                  |                        |                        |                           |                  |                  |                           |                      |                        |                          |
| 22 |                                  |                        |                        |                           |                  |                  |                           |                      |                        | 58.10                    |
| 23 | Maldives                         | 6 (5 to 7)             | 27 (21 to 33)          | 357.26 (319.05 to 402.53) | 0 (0 to 1)       | 1 (1 to 1)       | 97.39 (13.04 to 268.14)   | 19 (10 to 33)        | 29 (23 to 38)          | (-20.10 to 218.81)       |
| 24 |                                  |                        |                        |                           |                  |                  |                           |                      |                        |                          |
| 25 |                                  |                        |                        |                           |                  |                  |                           |                      |                        |                          |
| 26 |                                  |                        |                        |                           |                  |                  |                           |                      |                        |                          |
| 27 | Mali                             | 396 (321 to 489)       | 1033 (841 to 1256)     | 161.12 (141.84 to 182.05) | 29 (9 to 53)     | 55 (26 to 93)    | 90.14 (10.52 to 338.68)   | 1569 (384 to 3318)   | 2748 (1107 to 5138)    | 75.21 (-6.44 to 320.25)  |
| 28 |                                  |                        |                        |                           |                  |                  |                           |                      |                        |                          |
| 29 |                                  |                        |                        |                           |                  |                  |                           |                      |                        |                          |
| 30 |                                  |                        |                        |                           |                  |                  |                           |                      |                        |                          |
| 31 | Malta                            | 275 (237 to 318)       | 390 (346 to 441)       | 42.03 (32.40 to 52.30)    | 2 (2 to 2)       | 6 (5 to 7)       | 182.23 (117.73 to 248.53) | 84 (68 to 102)       | 149 (123 to 178)       | 77.16 (51.73 to 106.18)  |
| 32 |                                  |                        |                        |                           |                  |                  |                           |                      |                        |                          |
| 33 |                                  |                        |                        |                           |                  |                  |                           |                      |                        |                          |
| 34 | Marshall Islands                 | 1 (1 to 1)             | 2 (2 to 3)             | 81.58 (65.63 to 99.90)    | 0 (0 to 0)       | 0 (0 to 0)       | 14.19 (-33.41 to 79.45)   | 10 (6 to 17)         | 12 (6 to 20)           | 15.49 (-36.36 to 90.92)  |
| 35 |                                  |                        |                        |                           |                  |                  |                           |                      |                        |                          |
| 36 |                                  |                        |                        |                           |                  |                  |                           |                      |                        |                          |
| 37 |                                  |                        |                        |                           |                  |                  |                           |                      |                        |                          |
| 38 | Mauritania                       | 118 (96 to 144)        | 330 (270 to 405)       | 179.57 (158.4 to 202.27)  | 8 (4 to 11)      | 9 (6 to 13)      | 19.95 (-22.88 to 109.37)  | 322 (167 to 487)     | 376 (245 to 543)       | 16.93 (-28.24 to 120.07) |
| 39 |                                  |                        |                        |                           |                  |                  |                           |                      |                        |                          |
| 40 |                                  |                        |                        |                           |                  |                  |                           |                      |                        |                          |
| 41 |                                  |                        |                        |                           |                  |                  |                           |                      |                        |                          |
| 42 | Mauritius                        | 47 (37 to 58)          | 86 (69 to 102)         | 81.67 (65.36 to 99.25)    | 1 (1 to 1)       | 3 (3 to 4)       | 176.18 (101.94 to 258.21) | 50 (43 to 61)        | 117 (90 to 147)        | 134.12 (70.2 to 198.45)  |
| 43 |                                  |                        |                        |                           |                  |                  |                           |                      |                        |                          |
| 44 |                                  |                        |                        |                           |                  |                  |                           |                      |                        |                          |
| 45 |                                  |                        |                        |                           |                  |                  |                           |                      |                        |                          |
| 46 | Mexico                           | 25697 (21937 to 30082) | 46570 (40040 to 53889) | 81.22 (75.62 to 87.02)    | 157 (142 to 176) | 519 (408 to 622) | 229.87 (156.16 to 297.06) | 9626 (8180 to 11411) | 21132 (17386 to 25318) | 119.55 (86.73 to 154.33) |
| 47 |                                  |                        |                        |                           |                  |                  |                           |                      |                        |                          |
| 48 |                                  |                        |                        |                           |                  |                  |                           |                      |                        |                          |
| 49 | Micronesia (Federated States of) | 3 (2 to 4)             | 4 (3 to 5)             | 26.76 (16.02 to 38.96)    | 1 (0 to 1)       | 1 (0 to 1)       | -23.01 (-59.09 to 31.38)  | 28 (16 to 49)        | 20 (10 to 38)          | -27.22 (-62.97 to 22.93) |
| 50 |                                  |                        |                        |                           |                  |                  |                           |                      |                        |                          |
| 51 |                                  |                        |                        |                           |                  |                  |                           |                      |                        |                          |
| 52 |                                  |                        |                        |                           |                  |                  |                           |                      |                        |                          |
| 53 | Monaco                           | 43 (36 to 51)          | 59 (50 to 69)          | 37.31 (28.37 to 47.29)    | 0 (0 to 0)       | 0 (0 to 1)       | 37.96 (-4.38 to 94.10)    | 11 (8 to 14)         | 14 (11 to 18)          | 30.63 (10.51 to 53.62)   |
| 54 |                                  |                        |                        |                           |                  |                  |                           |                      |                        |                          |
| 55 |                                  |                        |                        |                           |                  |                  |                           |                      |                        |                          |
| 56 | Mongolia                         | 961 (801 to 1153)      | 2328 (1907 to 2810)    | 142.14 (124.80 to 161.08) | 11 (6 to 15)     | 12 (9 to 16)     | 11.41 (-26.46 to 89.38)   | 690 (380 to 1073)    | 814 (620 to 1028)      | 17.92 (-26.45 to 100.76) |
| 57 |                                  |                        |                        |                           |                  |                  |                           |                      |                        |                          |
| 58 |                                  |                        |                        |                           |                  |                  |                           |                      |                        |                          |
| 59 | Montenegro                       | 879 (744 to 1051)      | (890 to 1051)          | 19.54 (12.1 to 26.98)     | 2 (1 to 2)       | 3 (2 to 3)       | 48.81 (1.77 to 95.85)     | 191 (145 to 247)     | 221 (165 to 277)       | 15.74 (1.68 to 29.80)    |
| 60 |                                  |                        |                        |                           |                  |                  |                           |                      |                        |                          |

|    |                 |              |              |              |              |             |               |              |             |              |
|----|-----------------|--------------|--------------|--------------|--------------|-------------|---------------|--------------|-------------|--------------|
| 1  |                 |              |              |              |              |             |               |              |             |              |
| 2  |                 |              |              |              |              |             |               |              |             |              |
| 3  |                 | 1032)        | 1240)        | to 27.53)    |              | to 101.73)  | 247)          | 288)         | to 30.37)   |              |
| 4  |                 |              |              | 119.98       |              |             |               |              |             |              |
| 5  |                 | 3007 (2487   | 6614 (5488   | (105.44 to   | 31 (19 to    | 59 (41 to   | 91.82 (30.18  | 1438 (989 to | 2615 (1988  | 81.81 (30.04 |
| 6  | Morocco         | to 3582)     | to 7909)     | 135.91)      | 48)          | 77)         | to 192.53)    | 2101)        | to 3373)    | to 139.60)   |
| 7  |                 |              |              |              |              |             |               |              |             |              |
| 8  |                 |              |              | 128.31       |              |             | 107.07        |              |             | 75.44        |
| 9  |                 | 487 (397 to  | 1111 (897 to | (112.18 to   | 52 (30 to    | 107 (71 to  | (16.28 to     | 2567 (1058   | 4503 (2907  | (-18.50 to   |
| 10 | Mozambique      | 601)         | 1347)        | 146.62)      | 88)          | 154)        | 270.37)       | to 5668)     | to 7196)    | 319.21)      |
| 11 |                 |              |              |              |              |             |               |              |             |              |
| 12 |                 |              |              | 101.31       |              |             | -0.68         |              |             | -19.94       |
| 13 |                 | 1024 (797 to | 2062 (1656   | (83.73 to    | 60 (34 to    | 59 (44 to   | (-40.07 to    | 2820 (1386   | 2258 (1680  | (-57.94 to   |
| 14 | Myanmar         | 1272)        | to 2558)     | 120.83)      | 95)          | 82)         | 64.77)        | to 5128)     | to 3215)    | 48.65)       |
| 15 |                 |              |              |              |              |             |               |              |             |              |
| 16 |                 |              |              | 148.34       |              |             | 61.81 (0.64   | 218 (129 to  | 333 (223 to | 52.64        |
| 17 |                 | 87 (72 to    | 217 (175 to  | (130.13 to   | 6 (4 to 8)   | 9 (6 to 13) | to 190.79)    | 344)         | 498)        | (-12.57 to   |
| 18 | Namibia         | 108)         | 268)         | 167.81)      |              |             |               |              |             | 213.41)      |
| 19 |                 |              |              |              |              |             |               |              |             |              |
| 20 |                 |              |              | 12.57 (3.45  |              |             | -34.79        |              |             | -34.16       |
| 21 |                 | 0 (0 to 0)   | 0 (0 to 0)   | to 21.62)    | 0 (0 to 0)   | 0 (0 to 0)  | (-63.12 to    | 3 (1 to 6)   | 2 (1 to 4)  | (-60.95 to   |
| 22 | Nauru           |              |              |              |              |             | 6.11)         |              |             | 18.41)       |
| 23 |                 |              |              |              |              |             |               |              |             |              |
| 24 |                 |              |              | 131.04       |              |             | 23.09         |              |             |              |
| 25 |                 | 2180 (1726   | 5036 (4049   | (112.62 to   | 93 (56 to    | 115 (71 to  | (-15.11 to    | 3780 (2183   | 3819 (2683  | 1.05 (-34.25 |
| 26 | Nepal           | to 2758)     | to 6194)     | 151.30)      | 165)         | 190)        | 93.10)        | to 5903)     | to 5781)    | to 65.01)    |
| 27 |                 |              |              |              |              |             |               |              |             |              |
| 28 |                 | 24401        | 16251        | -33.4        |              |             | 180.66        |              | 12100       |              |
| 29 |                 | (22175 to    | (13975 to    | (-41.14 to   | 278 (240 to  | 782 (582 to | (78.32 to     | 8234 (6818   | (10246 to   | 46.95 (10.86 |
| 30 | Netherlands     | 26704)       | 18987)       | -24.18)      | 344)         | 906)        | 230.31)       | to 9979)     | 13731)      | to 70.21)    |
| 31 |                 |              |              |              |              |             |               |              |             |              |
| 32 |                 | 5873 (5089   | 8600 (7850   | 46.45 (37.95 | 20 (17 to    | 31 (26 to   | 58.14 (32.29  | 1267 (976 to | 1758 (1327  | 38.84 (26.73 |
| 33 | New Zealand     | to 6670)     | to 9491)     | to 57.06)    | 22)          | 39)         | to 109.75)    | 1592)        | to 2254)    | to 54.82)    |
| 34 |                 |              |              |              |              |             |               |              |             |              |
| 35 |                 | 500 (414 to  | 1453 (1218   | 190.37       |              |             | 177.21        |              |             | 137.59       |
| 36 | Nicaragua       | 598)         | to 1720)     | (167.53 to   | 3 (2 to 3)   | 7 (6 to 9)  | (99.51 to     | 187 (149 to  | 444 (340 to | (85.21 to    |
| 37 |                 |              |              | 212.17)      |              |             | 267.74)       | 245)         | 555)        | 192.36)      |
| 38 |                 |              |              |              |              |             |               |              |             |              |
| 39 |                 | 321 (256 to  | 942 (760 to  | 193.63       |              |             | 106.00        |              |             |              |
| 40 | Niger           | 395)         | 1154)        | (171.22 to   | 27 (9 to 54) | 55 (26 to   | (18.53 to     | 1564 (379 to | 2835 (1120  | 81.21 (-7.73 |
| 41 |                 |              |              | 216.83)      |              | 95)         | 313.02)       | 3724)        | to 5521)    | to 318.21)   |
| 42 |                 |              |              |              |              |             |               |              |             |              |
| 43 |                 | 5162 (4259   | 14578        | 182.41       |              |             | 78.53 (23.85  | 15139 (7194  | 26794       | 76.98 (13.30 |
| 44 | Nigeria         | to 6269)     | (11955 to    | (176.97 to   | 314 (165 to  | 560 (306 to | to 168.11)    | to 24017)    | (15017 to   | to 185.01)   |
| 45 |                 |              | 17708)       | 187.98)      | 514)         | 909)        |               |              | 42474)      |              |
| 46 |                 |              |              |              |              |             |               |              |             |              |
| 47 |                 |              |              | -12.86       |              |             | -42.22        |              |             | -45.91       |
| 48 |                 | 0 (0 to 0)   | 0 (0 to 0)   | (-20.01 to   | 0 (0 to 0)   | 0 (0 to 0)  | (-65.13 to    | 1 (0 to 1)   | 0 (0 to 1)  | (-68.37 to   |
| 49 | Niue            |              |              | -3.97)       |              |             | -10.86)       |              |             | -8.78)       |
| 50 |                 |              |              |              |              |             |               |              |             |              |
| 51 |                 | 2473 (2098   | 3374 (2855   | 36.41 (27.51 |              |             | 37.22 (1.2 to | 490 (358 to  | 635 (459 to | 29.55 (14.26 |
| 52 | North Macedonia | to 2927)     | to 3973)     | to 46.86)    | 4 (3 to 4)   | 5 (3 to 6)  | 83.42)        | 648)         | 844)        | to 46.45)    |
| 53 | Northern        |              |              |              |              |             |               |              |             |              |
| 54 | Mariana         | 3 (2 to 3)   | 3 (3 to 4)   | 17.67 (3.72  | 0 (0 to 0)   | 0 (0 to 0)  | (-70.47 to    | 12 (8 to 19) | 5 (4 to 9)  | (-77.38 to   |
| 55 | Islands         |              |              | to 33.96)    |              |             | 26.41)        |              |             | -4.80)       |
| 56 |                 |              |              |              |              |             |               |              |             |              |
| 57 |                 | 20686        | 33097        | 60.00 (50.85 | 29 (26 to    | 38 (32 to   | 30.65 (17.07  | 3551 (2585   | 5414 (3835  | 52.44 (44.12 |
| 58 | Norway          | (17395 to    | (28492 to    | to 68.77)    | 41)          | 55)         | to 54.59)     | to 4687)     | to 7244)    | to 61.59)    |
| 59 |                 | 24323)       | 37859)       |              |              |             |               |              |             |              |
| 60 |                 |              |              |              |              |             |               |              |             |              |

|    |             |             |             |              |              |              |              |              |              |              |
|----|-------------|-------------|-------------|--------------|--------------|--------------|--------------|--------------|--------------|--------------|
| 1  |             |             |             |              |              |              |              |              |              |              |
| 2  |             |             |             |              |              |              |              |              |              |              |
| 3  |             |             |             | 265.15       |              |              | 135.73       |              |              | 206.46       |
| 4  | Oman        | 431 (347 to | 1575 (1266  | (237.03 to   | 2 (1 to 3)   | 4 (3 to 5)   | (37.95 to    | 122 (85 to   | 375 (271 to  | (111.98 to   |
| 5  |             | 517)        | to 1924)    | 297.09)      |              |              | 331.56)      | 178)         | 496)         | 320.55)      |
| 6  |             |             |             |              |              |              |              |              |              |              |
| 7  |             |             | 26815       | 168.59       |              |              |              |              | 27286        |              |
| 8  | Pakistan    | 9984 (7995  | (21768 to   | (154.72 to   | 454 (240 to  | 657 (447 to  | 44.84 (-2.73 | 16234 (9791  | (18727 to    | 68.08 (19.36 |
| 9  |             | to 12369)   | 33849)      | 184.98)      | 866)         | 993)         | to 133.76)   | to 26748)    | 38379)       | to 148.68)   |
| 10 |             |             |             |              |              |              |              |              |              |              |
| 11 |             |             |             |              |              |              | 23.28        |              |              | 14.99        |
| 12 | Palau       | 1 (1 to 1)  | 1 (1 to 1)  | 58.71 (43.16 | 0 (0 to 0)   | 0 (0 to 0)   | (-26.34 to   | 3 (2 to 7)   | 4 (2 to 6)   | (-29.80 to   |
| 13 |             |             |             | to 76.15)    |              |              | 101.05)      |              |              | 103.99)      |
| 14 |             |             |             |              |              |              |              |              |              |              |
| 15 |             |             |             | 261.47       |              |              | 49.80        |              |              | 142.19       |
| 16 | Palestine   | 374 (305 to | 1351 (1104  | (229.04 to   | 3 (2 to 4)   | 4 (3 to 6)   | (-14.64 to   | 132 (92 to   | 320 (235 to  | (82.43 to    |
| 17 |             | 450)        | to 1621)    | 293.11)      |              |              |              | 127.75)      | 195)         | 443)         |
| 18 |             |             |             |              |              |              |              |              |              |              |
| 19 |             |             |             | 141.92       |              |              | 239.99       |              |              | 129.97       |
| 20 | Panama      | 553 (471 to | 1338 (1131  | (123.11 to   | 7 (6 to 10)  | 25 (19 to    | (135.70 to   | 436 (347 to  | 1002 (763 to | (65.87 to    |
| 21 |             | 638)        | to 1560)    | 161.72)      |              |              | 32)          | 373.74)      | 538)         | 1297)        |
| 22 |             |             |             |              |              |              |              |              |              |              |
| 23 |             |             |             | 145.64       |              |              |              |              |              |              |
| 24 | Papua New   | 116 (92 to  | 285 (229 to | (124.56 to   | 13 (7 to 20) | 25 (16 to    | 95.85 (20.41 | 661 (335 to  | 1258 (758 to | 90.40 (5.88  |
| 25 |             | Guinea      | 140)        | 350)         | 168.38)      |              | 38)          | to 222.69)   | 1140)        | 2034)        |
| 26 |             |             |             |              |              |              |              |              |              |              |
| 27 |             |             |             |              |              |              | 171.03       |              |              |              |
| 28 | Paraguay    | 996 (853 to | 1956 (1652  | 96.35 (82.38 | 4 (4 to 5)   | 12 (8 to 16) | (73.55 to    | 327 (263 to  | 647 (481 to  | 97.76 (55.83 |
| 29 |             | 1165)       | to 2324)    | to 111.71)   |              |              | 302.03)      | 404)         | 831)         | to 147.82)   |
| 30 |             |             |             |              |              |              |              |              |              |              |
| 31 |             |             |             | 120.79       |              |              | -40.28       |              |              | -62.13       |
| 32 | Peru        | 2566 (2121  | 5665 (4638  | (105.66 to   | 128 (74 to   | 76 (54 to    | (-66.32 to   | 8234 (3972   | 3118 (2308   | (-79.74 to   |
| 33 |             | to 3079)    | to 6822)    | 138.38)      | 194)         | 105)         | 19.96)       | to 13912)    | to 4194)     | -11.96)      |
| 34 |             |             |             |              |              |              |              |              |              |              |
| 35 |             |             |             | 145.40       |              |              | 19.59        |              |              |              |
| 36 | Philippines | 2067 (1630  | 5073 (4044  | (135.48 to   | 98 (54 to    | 117 (95 to   | (-15.39 to   | 3743 (2419   | 4556 (3797   | 21.71 (-7.83 |
| 37 |             | to 2519)    | to 6166)    | 156.45)      | 125)         | 155)         | 149.06)      | to 4551)     | to 5981)     | to 121.46)   |
| 38 |             |             |             |              |              |              |              |              |              |              |
| 39 |             | 177477      | 88307       | -50.24       |              |              |              | 30297        | 20081        | -33.72       |
| 40 | Poland      | (149170 to  | (77909 to   | (-54.72 to   | 180 (168 to  | 361 (281 to  | 99.98 (43.08 | (21831 to    | (15602 to    | (-41.18 to   |
| 41 |             | 211629)     | 99826)      | -45.27)      | 211)         | 426)         | to 136.68)   | 40254)       | 25064)       | -24.23)      |
| 42 |             |             |             |              |              |              |              |              |              |              |
| 43 |             |             |             |              |              |              | 277.16       |              |              | 119.87       |
| 44 | Portugal    | 6035 (5365  | 9894 (8866  | 63.94 (50.98 | 81 (72 to    | 306 (158 to  | (96.34 to    | 2425 (2073   | 5332 (3507   | (37.89 to    |
| 45 |             | to 6750)    | to 11003)   | to 79.42)    | 90)          | 363)         | 355.45)      | to 2832)     | to 6256)     | 153.53)      |
| 46 |             |             |             |              |              |              |              |              |              |              |
| 47 |             |             |             |              |              |              | -9.54        |              |              | -21.63       |
| 48 | Puerto Rico | 1123 (1058  | 1442 (1320  | 28.41 (21.63 | 20 (15 to    | 18 (13 to    | (-38.39 to   | 755 (589 to  | 592 (456 to  | (-40.46 to   |
| 49 |             | to 1194)    | to 1565)    | to 35.32)    | 22)          | 28)          | 73.14)       | 869)         | 801)         | 23.39)       |
| 50 |             |             |             |              |              |              |              |              |              |              |
| 51 |             |             |             | 838.58       |              |              | 413.11       |              |              | 628.10       |
| 52 | Qatar       | 154 (123 to | 1446 (1178  | (770.76 to   | 0 (0 to 1)   | 2 (1 to 3)   | (169.07 to   | 41 (29 to    | 296 (205 to  | (423.39 to   |
| 53 |             | 187)        | to 1746)    | 916.51)      |              |              |              | 853.64)      | 57)          | 412)         |
| 54 |             |             |             |              |              |              |              |              |              |              |
| 55 | Republic of | 17167       | 46956       | 173.52       |              |              | -25.35       |              |              | 10.04        |
| 56 |             | Korea       | (15174 to   | (44197 to    | (147.67 to   | 313 (143 to  | 234 (183 to  | (-46.63 to   | 9498 (6903   | 10451 (7829  |
| 57 | 19498)      | 49997)      | 206.09)     | 399)         | 313)         |              | 58.97)       | to 11454)    | to 13343)    | 63.35)       |
| 58 | Republic of | 3098 (2561  | 3166 (2836  | 2.20 (-11.58 | 17 (14 to    | 18 (14 to    | 4.75 (-16.20 | 1046 (844 to | 999 (820 to  | -4.45        |
| 59 | Moldova     | to 3712)    | to 3521)    | to 19.64)    | 21)          | 21)          | to 31.59)    | 1266)        | 1209)        | (-18.23 to   |
| 60 |             |             |             |              |              |              |              |              |              |              |



|    |                 |              |             |              |              |            |              |              |              |              |
|----|-----------------|--------------|-------------|--------------|--------------|------------|--------------|--------------|--------------|--------------|
| 1  |                 |              |             |              |              |            |              |              |              |              |
| 2  |                 |              |             |              |              |            |              |              |              |              |
| 3  |                 |              |             |              |              |            |              |              |              | 13.21)       |
| 4  |                 |              |             |              |              |            |              |              |              | -17.18       |
| 5  |                 | 17947        | 17043       | -5.04        |              |            |              |              |              |              |
| 6  | Romania         | (15104 to    | (15232 to   | (-15.24 to   | 64 (55 to    | 74 (59 to  | 15.86 (-8.37 | 5269 (4206   | 4364 (3404   | (-29.98 to   |
| 7  |                 | 21254)       | 19020)      | 7.37)        | 76)          | 93)        | to 45.57)    | to 6540)     | to 5459)     | -2.13)       |
| 8  |                 |              |             |              |              |            |              |              |              |              |
| 9  | Russian         | 167371       | 170565      | 1.91 (-0.13  | 977 (726 to  | 1257 (1021 | 28.65 (6.46  | 53401        | 56533        | 5.86 (-5.94  |
| 10 | Federation      | (141580 to   | (145182 to  | to 4.04)     | 1128)        | to 1464)   | to 62.61)    | (41640 to    | (46127 to    | to 23.29)    |
| 11 |                 | 195591)      | 199143)     |              |              |            |              | 64977)       | 69324)       |              |
| 12 |                 |              |             |              |              |            |              |              |              |              |
| 13 | Rwanda          | 288 (237 to  | 726 (584 to | 152.30       | 34 (20 to    | 42 (27 to  | 21.96        | 1761 (735 to | 1838 (1153   | 4.34 (-55.16 |
| 14 |                 | 355)         | 888)        | (132.10 to   | 59)          | 62)        | (-36.82 to   | 3717)        | to 3012)     | to 173.20)   |
| 15 |                 |              |             | 172.65)      |              |            | 143.44)      |              |              |              |
| 16 |                 |              |             | 106.61       |              |            |              |              |              | 14.61        |
| 17 | Saint Kitts and |              | 21 (17 to   | (90.32 to    | 1 (1 to 1)   | 1 (1 to 1) | 9.71 (-25.03 | 25 (19 to    | 28 (19 to    | (-24.18 to   |
| 18 | Nevis           | 10 (8 to 12) | 26)         | 126.13)      |              |            | to 72.10)    | 29)          | 41)          | 78.38)       |
| 19 |                 |              |             | 131.09       |              |            |              |              |              |              |
| 20 | Saint Lucia     | 25 (21 to    | 59 (48 to   | (113.96 to   | 1 (1 to 1)   | 1 (1 to 2) | 47.65 (10.86 | 36 (29 to    | 45 (36 to    | 26.50 (-1.54 |
| 21 |                 | 31)          | 72)         | 149.59)      |              |            | to 116.72)   | 41)          | 56)          | to 79.21)    |
| 22 |                 |              |             |              |              |            |              |              |              |              |
| 23 | Saint Vincent   |              | 32 (26 to   | 63.64 (48.19 | 1 (1 to 1)   | 2 (1 to 2) | 54.50 (13.27 | 39 (32 to    | 49 (40 to    | 27.47 (-3.02 |
| 24 | and the         | 20 (16 to    | 39)         | to 80.82)    |              |            | to 112.91)   | 45)          | 62)          | to 72.66)    |
| 25 | Grenadines      |              |             |              |              |            |              |              |              |              |
| 26 |                 |              |             | 34.52 (23.82 | 1 (1 to 1)   | 1 (1 to 1) | 6.37 (-33.37 | 31 (20 to    | 30 (19 to    | -1.06        |
| 27 | Samoa           | 6 (5 to 8)   | 9 (7 to 10) | to 45.98)    |              |            | to 64.06)    | 46)          | 45)          | (-42.04 to   |
| 28 |                 |              |             |              |              |            |              |              |              | 65.39)       |
| 29 |                 |              |             |              |              |            |              |              |              |              |
| 30 |                 |              |             |              |              |            |              |              |              |              |
| 31 |                 |              |             |              |              |            |              |              |              |              |
| 32 |                 |              |             |              |              |            | 167.91       |              |              |              |
| 33 | San Marino      | 29 (25 to    | 48 (41 to   | 65.44 (55.11 | 0 (0 to 0)   | 0 (0 to 0) | (65.76 to    | 6 (4 to 8)   | 10 (8 to 14) | 74.92 (47.44 |
| 34 |                 | 35)          | 57)         | to 76.39)    |              |            | 328.84)      |              |              | to 111.54)   |
| 35 |                 |              |             |              |              |            |              |              |              |              |
| 36 |                 |              |             | 135.19       |              |            |              |              |              |              |
| 37 | Sao Tome and    |              | 18 (15 to   | (118.79 to   | 0 (0 to 1)   | 0 (0 to 1) | 3.87 (-41.14 | 15 (8 to 24) | 16 (11 to    | 4.71 (-42.23 |
| 38 | Principe        | 8 (6 to 10)  | 23)         | 152.91)      |              |            | to 89.85)    |              | 24)          | to 108.14)   |
| 39 |                 |              |             |              |              |            |              |              |              |              |
| 40 |                 |              |             | 268.63       |              |            |              |              |              | 214.41       |
| 41 | Saudi Arabia    | 3748 (3112   | 13816       | (237.42 to   | 12 (7 to 20) | 27 (18 to  | 131.24 (9.23 | 1012 (729 to | 3181 (2284   | (119.36 to   |
| 42 |                 | to 4462)     | (11338 to   | 301.72)      |              | 38)        | to 337.69)   | 1405)        | to 4376)     | 315.14)      |
| 43 |                 |              |             |              |              |            |              |              |              |              |
| 44 |                 |              |             | 153.93       |              |            |              |              |              | 40.90        |
| 45 | Senegal         | 366 (298 to  | 930 (756 to | (136.66 to   | 23 (10 to    | 37 (22 to  | 61.95 (2.65  | 1084 (420 to | 1527 (911 to | (-20.02 to   |
| 46 |                 | 449)         | 1164)       | 171.52)      | 37)          | 57)        | to 184.83)   | 1912)        | 2378)        | 185.33)      |
| 47 |                 |              |             |              |              |            |              |              |              |              |
| 48 |                 | 12769        | 16638       | 30.30 (20.12 | 49 (37 to    | 113 (74 to | 128.93 (9.06 | 3314 (2528   | 4741 (3595   | 43.04 (-2.81 |
| 49 | Serbia          | (10737 to    | (14322 to   | to 43.95)    | 78)          | 147)       | to 259.34)   | to 4479)     | to 5996)     | to 78.90)    |
| 50 |                 | 14873)       | 19211)      |              |              |            |              |              |              |              |
| 51 |                 |              |             | 117.31       |              |            |              |              |              |              |
| 52 | Seychelles      | 3 (2 to 4)   | 6 (5 to 8)  | (99.80 to    | 0 (0 to 0)   | 0 (0 to 0) | 28.62 (-7.02 | 5 (4 to 7)   | 7 (5 to 9)   | 31.52 (-0.75 |
| 53 |                 |              |             | 136.88)      |              |            | to 75.47)    |              |              | to 71.15)    |
| 54 |                 |              |             |              |              |            |              |              |              |              |
| 55 |                 |              |             | 158.32       |              |            |              |              |              |              |
| 56 | Sierra Leone    | 181 (149 to  | 467 (379 to | (138.65 to   | 11 (4 to 19) | 20 (10 to  | 87.02 (3.04  | 554 (164 to  | 981 (457 to  | 76.91 (-7.60 |
| 57 |                 | 220)         | 582)        | 178.83)      |              | 32)        | to 331.6)    | 1133)        | 1656)        | to 330.39)   |
| 58 |                 |              |             |              |              |            |              |              |              |              |
| 59 | Singapore       | 1615 (1305   | 3179 (2593  | 96.84 (78.98 | 4 (3 to 4)   | 5 (4 to 8) | 39.94 (6.12  | 375 (279 to  | 612 (427 to  | 63.29 (34.14 |
| 60 |                 |              |             |              |              |            |              |              |              |              |



|    |              |             |             |              |              |             |              |              |              |              |
|----|--------------|-------------|-------------|--------------|--------------|-------------|--------------|--------------|--------------|--------------|
| 1  |              |             |             |              |              |             |              |              |              |              |
| 2  |              |             |             |              |              |             |              |              |              |              |
| 3  |              | to 1934)    | to 3962)    | to 116.81)   |              | to 150.34)  | 490)         | 838)         | to 100.87)   |              |
| 4  |              | 9361 (8373  | 10674 (9737 | 14.02 (8.30  | 31 (25 to    | 58 (41 to   | 88.23 (-3.03 | 2274 (1743   | 2856 (2175   | 25.60 (-5.11 |
| 5  | Slovakia     | to 10336)   | to 11684)   | to 20.14)    | 48)          | 76)         | to 176.55)   | to 2989)     | to 3557)     | to 53.77)    |
| 6  |              | 3775 (3318  | 4739 (4282  | 25.55 (17.98 |              | 18 (13 to   | 86.00 (28.56 | 781 (579 to  | 977 (726 to  | 25.10 (7.66  |
| 7  |              | to 4289)    | to 5219)    | to 33.07)    | 10 (8 to 13) | 25)         | to 165.93)   | 1011)        | 1253)        | to 43.50)    |
| 8  | Slovenia     |             |             | 124.02       |              |             |              |              |              |              |
| 9  |              | 8 (6 to 9)  | 17 (13 to   | (102.93 to   | 1 (1 to 2)   | 2 (1 to 3)  | 64.34 (-3.76 | 53 (24 to    | 86 (48 to    | 63.24 (-5.21 |
| 10 | Solomon      |             | 21)         | 148.4)       |              |             | to 176.72)   | 101)         | 156)         | to 190.03)   |
| 11 | Islands      |             |             | 165.38       |              |             | 109.57       |              |              |              |
| 12 |              | 237 (190 to | 630 (502 to | (145.60 to   | 19 (7 to 40) | 40 (21 to   | (26.24 to    | 1021 (282 to | 1986 (928 to | 94.57 (2.46  |
| 13 |              | 293)        | 786)        | 187.38)      |              | 71)         | 263.84)      | 2543)        | 3988)        | to 316.32)   |
| 14 | Somalia      |             |             | 122.12       |              |             |              |              |              |              |
| 15 |              | 2945 (2438  | 6542 (5423  | (114.01 to   | 98 (69 to    | 166 (124 to | 69.87 (20.49 | 4862 (3068   | 6143 (4966   | 26.34        |
| 16 |              | to 3586)    | to 7934)    | 131.25)      | 123)         | 196)        | to 168.66)   | to 7236)     | to 7083)     | (-18.56 to   |
| 17 | South Africa |             |             | 88.39 (73.80 |              |             |              |              |              |              |
| 18 |              | 249 (202 to | 469 (383 to | to 103.53)   | 22 (9 to 43) | 29 (16 to   | 29.68        | 1158 (325 to | 1315 (637 to | 13.58        |
| 19 | South Sudan  |             | 576)        |              |              | 61)         | (-39.27 to   | 2801)        | 2625)        | (-53.56 to   |
| 20 |              | 39276       | 77822       | 98.14 (91.73 | 278 (237 to  | 377 (303 to | 35.79 (8.43  | 11347 (9316  | 17466        | 53.93 (36.17 |
| 21 |              | (37463 to   | (74030 to   | to 104.75)   | 304)         | 600)        | to 121.33)   | to 13673)    | (13535 to    | to 79.47)    |
| 22 | Spain        |             | 81685)      |              |              |             |              |              | 22106)       |              |
| 23 |              | 909 (734 to | 2295 (2003  | 152.54       | 19 (14 to    | 21 (15 to   | 13.97        | 813 (609 to  | 895 (684 to  | 10.11        |
| 24 |              | 1119)       | to 2637)    | (124.22 to   | 24)          | 30)         | (-25.92 to   | 1032)        | 1147)        | (-20.92 to   |
| 25 |              |             |             | 186.13)      |              |             | 74.18)       |              |              | 51.47)       |
| 26 | Sri Lanka    |             |             | 180.28       |              |             |              |              |              |              |
| 27 |              | 3315 (2684  | 9292 (7568  | (157.81 to   | 21 (10 to    | 48 (28 to   | 123.91 (3.53 | 1310 (720 to | 3003 (2102   | 129.31 (11.1 |
| 28 |              | to 4060)    | to 11371)   | 205.52)      | 44)          | 78)         | to 380.84)   | 2866)        | to 4130)     | to 282.19)   |
| 29 | Sudan        |             |             | 98.73 (81.35 |              |             |              |              |              |              |
| 30 |              | 79 (66 to   | 158 (129 to | to 117.62)   | 3 (2 to 3)   | 4 (3 to 5)  | 32.93 (-4.19 | 118 (85 to   | 138 (109 to  | 16.97        |
| 31 | Suriname     |             | 194)        |              |              |             | to 91.78)    | 146)         | 175)         | (-14.68 to   |
| 32 |              | 30612       | 40244       | 31.46 (23.94 | 107 (86 to   | 95 (77 to   | -11.38       | 6158 (4631   | 7117 (5148   | 15.58 (4.65  |
| 33 |              | (26350 to   | (34733 to   | to 40.19)    | 119)         | 139)        | (-27.36 to   | to 7936)     | to 9548)     | to 28.78)    |
| 34 | Sweden       |             | 46000)      |              |              |             | 46.41)       |              |              |              |
| 35 |              | 10695 (9668 | 14969       | 39.96 (33.88 | 73 (58 to    | 123 (97 to  | 69.01 (36.46 | 2817 (2268   | 3807 (2979   | 35.16 (21.15 |
| 36 |              | to 11813)   | (13688 to   | to 46.34)    | 83)          | 160)        | to 128.96)   | to 3429)     | to 4738)     | to 56.09)    |
| 37 | Switzerland  |             |             | 116.26       |              |             |              |              |              |              |
| 38 |              | 2248 (1819  | 4862 (3940  | (97.13 to    | 23 (13 to    | 37 (20 to   | 57.25        | 1091 (741 to | 1653 (1195   | 51.58 (7.71  |
| 39 | Syrian Arab  |             | to 5871)    | 135.91)      | 35)          | 52)         | (-10.52 to   | 1432)        | to 2195)     | to 137.88)   |
| 40 | Republic     |             |             | 308.12       |              |             |              |              |              |              |
| 41 |              | 2221 (1923  | 9064 (8139  | (279.81 to   | 101 (67 to   | 199 (152 to | 97.46 (44.81 | 2623 (1919   | 4338 (3499   | 65.37 (31.64 |
| 42 | Taiwan       |             | to 10153)   | 342.19)      | 113)         | 264)        | to 288.02)   | to 2947)     | to 5416)     | to 167.25)   |
| 43 | (Province of |             |             | 130.78       |              |             |              |              |              |              |
| 44 | China)       | 2391 (1972  | 5519 (4623  | (115.02 to   | 21 (11 to    | 18 (13 to   | -11.19       | 1691 (853 to | 1646 (1219   | -2.66        |
| 45 |              | to 2877)    | to 6632)    | 148.48)      | 34)          | 26)         | (-54.29 to   | 2831)        | to 2185)     | (-48.60 to   |
| 46 | Tajikistan   |             |             |              |              |             | 82.80)       |              |              | 91.67)       |
| 47 |              |             |             |              |              |             |              |              |              |              |
| 48 |              |             |             |              |              |             |              |              |              |              |
| 49 |              |             |             |              |              |             |              |              |              |              |
| 50 |              |             |             |              |              |             |              |              |              |              |
| 51 |              |             |             |              |              |             |              |              |              |              |
| 52 |              |             |             |              |              |             |              |              |              |              |
| 53 |              |             |             |              |              |             |              |              |              |              |
| 54 |              |             |             |              |              |             |              |              |              |              |
| 55 |              |             |             |              |              |             |              |              |              |              |
| 56 |              |             |             |              |              |             |              |              |              |              |
| 57 |              |             |             |              |              |             |              |              |              |              |
| 58 |              |             |             |              |              |             |              |              |              |              |
| 59 |              |             |             |              |              |             |              |              |              |              |
| 60 |              |             |             |              |              |             |              |              |              |              |

|    |              |              |             |              |              |              |              |             |              |              |
|----|--------------|--------------|-------------|--------------|--------------|--------------|--------------|-------------|--------------|--------------|
| 1  |              |              |             |              |              |              |              |             |              |              |
| 2  |              |              |             |              |              |              |              |             |              |              |
| 3  |              |              |             | 119.65       |              |              |              |             |              | 12.87        |
| 4  | Thailand     | 1734 (1327   | 3808 (3078  | (96.59 to    | 72 (52 to    | 111 (80 to   | 54.05 (-3.23 | 2899 (2029  | 3272 (2453   | (-26.29 to   |
| 5  |              | to 2180)     | to 4630)    | 151.17)      | 95)          | 149)         | to 138.51)   | to 3946)    | to 4259)     | 71.96)       |
| 6  |              |              |             |              |              |              |              |             |              |              |
| 7  |              |              |             | 122.2        |              |              | 107.01       |             |              | 47.21        |
| 8  | Timor-Leste  | 18 (14 to    | 41 (33 to   | (104.08 to   | 1 (1 to 3)   | 3 (2 to 5)   | (24.75 to    | 59 (29 to   | 86 (48 to    | (-28.05 to   |
| 9  |              | 23)          | 50)         | 146.48)      |              |              | 246.34)      | 102)        | 138)         | 185.55)      |
| 10 |              |              |             |              |              |              |              |             |              |              |
| 11 |              |              |             | 170.07       |              |              | 142.31       |             |              | 105.73       |
| 12 | Togo         | 190 (155 to  | 514 (418 to | (148.46 to   | 9 (4 to 14)  | 21 (14 to    | (33.33 to    | 457 (182 to | 940 (589 to  | (15.73 to    |
| 13 |              | 232)         | 634)        | 196.29)      |              | 30)          | 393.01)      | 773)        | 1321)        | 366.27)      |
| 14 |              |              |             |              |              |              |              |             |              |              |
| 15 |              |              |             |              |              |              | -38.14       |             |              | -39.66       |
| 16 | Tokelau      | 0 (0 to 0)   | 0 (0 to 0)  | 17.45 (9.66  | 0 (0 to 0)   | 0 (0 to 0)   | (-61.51 to   | 0 (0 to 1)  | 0 (0 to 0)   | (-63.93 to   |
| 17 |              |              |             | to 26.52)    |              |              | -1.52)       |             |              | 8.06)        |
| 18 |              |              |             |              |              |              |              |             |              |              |
| 19 |              |              |             |              |              |              |              |             |              | -11.27       |
| 20 | Tonga        | 4 (3 to 5)   | 4 (4 to 5)  | 14.32 (5.18  | 1 (0 to 1)   | 1 (0 to 1)   | 0.57 (-36.36 | 21 (14 to   | 19 (13 to    | (-43.54 to   |
| 21 |              |              |             | to 25.01)    |              |              | to 55.61)    | 30)         | 27)          | 36.78)       |
| 22 |              |              |             |              |              |              |              |             |              |              |
| 23 | Trinidad and | 275 (226 to  | 476 (395 to | 73.31 (60.64 | 3 (2 to 4)   | 5 (4 to 7)   | 67.08 (17.69 | 143 (110 to | 215 (162 to  | 49.93 (17.59 |
| 24 | Tobago       | 333)         | 586)        | to 88.40)    |              |              | to 135.28)   | 169)        | 279)         | to 92.29)    |
| 25 |              |              |             |              |              |              |              |             |              |              |
| 26 |              |              |             | 139.49       |              |              | 124.51       |             |              | 113.58       |
| 27 | Tunisia      | 2247 (1845   | 5382 (4413  | (122.55 to   | 7 (5 to 11)  | 16 (11 to    | (18.63 to    | 569 (405 to | 1215 (890 to | (59.27 to    |
| 28 |              | to 2720)     | to 6568)    | 159.3)       |              | 23)          | 312.49)      | 784)        | 1622)        | 174.73)      |
| 29 |              |              |             |              |              |              |              |             |              |              |
| 30 |              | 24930        | 93902       | 276.67       | 261 (159 to  | 329 (250 to  | 26.21        | 13910 (9268 | 22488        | 61.67 (9.74  |
| 31 | Turkey       | (21910 to    | (80596 to   | (231.04 to   | 401)         | 471)         | (-22.73 to   | to 19352)   | (17253 to    | to 147.01)   |
| 32 |              | 28012)       | 107925)     | 325.07)      |              |              | 118.88)      |             | 28896)       |              |
| 33 |              |              |             |              |              |              |              |             |              |              |
| 34 |              |              |             | 116.48       |              |              | 45.23 (9.53  | 765 (493 to | 1120 (805 to | 46.38 (13.41 |
| 35 | Turkmenistan | 1758 (1463   | 3806 (3155  | (102.66 to   | 10 (7 to 13) | 14 (9 to 20) | to 98.88)    | 1049)       | 1438)        | to 91.33)    |
| 36 |              | to 2085)     | to 4551)    | 132.01)      |              |              |              |             |              |              |
| 37 |              |              |             |              |              |              |              |             |              |              |
| 38 |              |              |             |              |              |              | -5.17        |             |              | -16.57       |
| 39 | Tuvalu       | 0 (0 to 0)   | 0 (0 to 1)  | 27.01 (14.84 | 0 (0 to 0)   | 0 (0 to 0)   | (-39.67 to   | 3 (1 to 5)  | 2 (1 to 4)   | (-50.42 to   |
| 40 |              |              |             | to 39.84)    |              |              | 57.04)       |             |              | 58.50)       |
| 41 |              |              |             |              |              |              |              |             |              |              |
| 42 |              |              |             | 198.27       |              |              | 114.15       |             |              | 103.84       |
| 43 | Uganda       | 569 (462 to  | 1697 (1381  | (178.98 to   | 48 (30 to    | 102 (70 to   | (26.45 to    | 2257 (1132  | 4600 (3084   | (-2.52 to    |
| 44 |              | 701)         | to 2111)    | 220.89)      | 75)          | 150)         | 252.91)      | to 4612)    | to 7058)     | 318.38)      |
| 45 |              |              |             |              |              |              |              |             |              |              |
| 46 |              | 44470        | 42711       | -3.95        | 230 (174 to  | 260 (210 to  | 12.61        | 13419       | 14197        | 5.80 (-13.37 |
| 47 | Ukraine      | (37197 to    | (36101 to   | (-10.23 to   | 306)         | 315)         | (-17.79 to   | (10673 to   | (11469 to    | to 26.77)    |
| 48 |              | 53622)       | 51042)      | 3.42)        |              |              | 52.12)       | 16857)      | 17211)       |              |
| 49 |              |              |             |              |              |              |              |             |              |              |
| 50 | United Arab  | 595 (477 to  | 5742 (4546  | 864.58       |              |              | 939.61       | 144 (93 to  | 1401 (971 to | 871.11       |
| 51 | Emirates     | 725)         | to 7126)    | (768.02 to   | 1 (1 to 3)   | 13 (7 to 22) | (312.54 to   | 219)        | 1965)        | (531.13 to   |
| 52 |              |              |             | 978.3)       |              |              | 2260.01)     |             |              | 1256.31)     |
| 53 |              |              |             |              |              |              |              |             |              |              |
| 54 | United       | 150003       | 194529      | 29.68 (26.73 | 856 (756 to  | 1793 (1533   | 109.50       | 37500       | 55171        | 47.12 (29.39 |
| 55 | Kingdom      | (132531 to   | (173985 to  | to 33.13)    | 1056)        | to 1999)     | (62.60 to    | (30121 to   | (45323 to    | to 55.47)    |
| 56 |              | 168508)      | 215870)     |              |              |              | 132.89)      | 46024)      | 66217)       |              |
| 57 | United       |              |             | 157.88       |              |              | 111.26       |             |              |              |
| 58 | Republic of  | 1121 (914 to | 2891 (2330  | (138.98 to   | 86 (53 to    | 181 (115 to  | (24.98 to    | 4655 (2090  | 8565 (4988   | 83.97 (-7.81 |
| 59 | Tanzania     | 1369)        | to 3566)    | 177.80)      | 152)         | 259)         | 260.69)      | to 9955)    | to 14089)    | to 290.41)   |
| 60 |              |              |             |              |              |              |              |             |              |              |

|    |                |             |             |              |              |             |              |              |             |              |
|----|----------------|-------------|-------------|--------------|--------------|-------------|--------------|--------------|-------------|--------------|
| 1  |                |             |             |              |              |             |              |              |             |              |
| 2  |                |             |             |              |              |             |              |              |             |              |
| 3  |                | 982982      | 762890      | -22.39       |              |             | 172.17       | 186357       | 215289      |              |
| 4  | United States  | (846833 to  | (712357 to  | (-29.48 to   | 2171 (1940   | 5910 (4622  | (80.73 to    | (137531 to   | (175991 to  | 15.53 (-1.97 |
| 5  | of America     | 1129783)    | 813654)     | -14.49)      | to 2662)     | to 6464)    | 199.18)      | 243644)      | 256059)     | to 33.87)    |
| 6  |                |             |             |              |              |             | 11.78        |              |             | -9.33        |
| 7  |                |             |             |              |              |             |              |              |             |              |
| 8  | United States  | 32 (27 to   | 47 (39 to   | 46.61 (32.66 | 1 (0 to 1)   | 1 (1 to 1)  | (-24.49 to   | 26 (19 to    | 23 (18 to   | (-33.27 to   |
| 9  | Virgin Islands | 39)         | 58)         | to 61.87)    |              |             | 72.41)       | 32)          | 29)         | 25.88)       |
| 10 |                |             |             |              |              |             | 123.02       |              |             |              |
| 11 |                |             |             |              |              |             |              |              |             |              |
| 12 | Uruguay        | 586 (485 to | 685 (564 to | 16.85 (7.20  | 10 (9 to 14) | 22 (19 to   | (68.94 to    | 339 (290 to  | 572 (496 to | 68.83 (35.57 |
| 13 |                | 711)        | 830)        | to 26.83)    |              | 26)         | 165.97)      | 426)         | 648)        | to 94.94)    |
| 14 |                |             |             |              |              |             |              |              |             |              |
| 15 |                |             | 23340       | 122.19       |              |             |              |              |             |              |
| 16 | Uzbekistan     | 10505 (8847 | (19452 to   | (107.43 to   | 48 (31 to    | 73 (58 to   | 51.36 (12.53 | 4299 (3006   | 6869 (5391  | 59.77 (27.87 |
| 17 |                | to 12563)   | 27952)      | 140.58)      | 59)          | 93)         | to 153.54)   | to 5336)     | to 8500)    | to 109.54)   |
| 18 |                |             |             | 115.45       |              |             |              |              |             |              |
| 19 |                |             |             |              |              |             |              |              |             |              |
| 20 | Vanuatu        | 4 (3 to 5)  | 9 (7 to 11) | (98.23 to    | 1 (0 to 1)   | 2 (1 to 2)  | 77.85 (12.27 | 33 (17 to    | 57 (33 to   | 71.58 (-1.00 |
| 21 |                |             |             | 135.09)      |              |             | to 189.96)   | 55)          | 92)         | to 187.82)   |
| 22 |                |             |             |              |              |             |              |              |             |              |
| 23 | Venezuela      |             |             | 130.21       |              |             |              |              |             |              |
| 24 | (Bolivarian    | 3817 (3268  | 8787 (7406  | (113.08 to   | 28 (19 to    | 44 (31 to   | 58.23 (11.55 | 1676 (1316   | 2642 (2032  | 57.61 (25.64 |
| 25 | Republic of)   | to 4388)    | to 10382)   | 147.54)      | 32)          | 59)         | to 165.19)   | to 1993)     | to 3372)    | to 101.69)   |
| 26 |                |             |             |              |              |             |              |              |             |              |
| 27 |                |             | 20278       | 326.50       |              |             | -19.57       |              |             | 11.56        |
| 28 | Viet Nam       | 4754 (3636  | (16050 to   | (284.54 to   | 221 (120 to  | 177 (119 to | (-57.9 to    | 6650 (4129   | 7419 (5510  | (-26.71 to   |
| 29 |                | to 5967)    | 25063)      | 376.20)      | 327)         | 247)        | 40.02)       | to 8928)     | to 9604)    | 73.67)       |
| 30 |                |             |             |              |              |             |              |              |             |              |
| 31 |                |             |             | 244.20       |              |             | 217.58       |              |             | 213.69       |
| 32 | Yemen          | 1826 (1464  | 6284 (5044  | (216.72 to   | 14 (8 to 25) | 44 (30 to   | (89.82 to    | 772 (495 to  | 2423 (1790  | (96.39 to    |
| 33 |                | to 2237)    | to 7734)    | 270.66)      |              | 68)         | 463.74)      | 1411)        | to 3248)    | 365.86)      |
| 34 |                |             |             |              |              |             |              |              |             |              |
| 35 |                |             |             | 233.83       |              |             | 57.07        |              |             | 31.27        |
| 36 | Zambia         | 291 (236 to | 971 (790 to | (206.24 to   | 35 (18 to    | 55 (38 to   | (-21.84 to   | 1941 (679 to | 2548 (1621  | (-46.88 to   |
| 37 |                | 350)        | 1210)       | 265.39)      | 64)          | 76)         | 226.50)      | 4527)        | to 3800)    | 283.23)      |
| 38 |                |             |             |              |              |             |              |              |             |              |
| 39 | Zimbabwe       | 524 (430 to | 931 (757 to | 77.84 (65.57 | 22 (16 to    | 43 (25 to   | 98.08 (13.90 | 1018 (652 to | 1888 (1075  | 85.39 (11.43 |
| 40 |                | 644)        | 1165)       | to 91.40)    | 31)          | 65)         | to 202.61)   | 1728)        | to 2968)    | to 204.97)   |

Abbreviations: UI=uncertainty interval.

**Supplementary Table 5** Age-standardised prevalence, death and DALY rates for inflammatory bowel disease (IBD) by 204 countries or territories in 1990 and 2019, and their temporal trends from 1990 to 2019

| Characteristics     | Age-standardised prevalence rate |                           |                        | Age-standardized death rate |                     |                        | Age-standardized DALY rate |                        |                        |
|---------------------|----------------------------------|---------------------------|------------------------|-----------------------------|---------------------|------------------------|----------------------------|------------------------|------------------------|
|                     | per 100,000 population           |                           |                        | per 100,000 population      |                     |                        | per 100,000 population     |                        |                        |
|                     | 1990 No.<br>(95%UI)              | 2019 No.<br>(95%UI)       | EAPC No.<br>(95%CI)    | 1990 No.<br>(95%UI)         | 2019 No.<br>(95%UI) | EAPC No.<br>(95%CI)    | 1990 No.<br>(95%UI)        | 2019 No.<br>(95%UI)    | EAPC No.<br>(95%CI)    |
| Afghanistan         | 21.95 (17.75 to 26.86)           | 23.69 (19.05 to 29.24)    | 0.57 (0.40 to 0.74)    | 0.44 (0.22 to 0.78)         | 0.43 (0.26 to 0.64) | 0.01 (-0.06 to 0.08)   | 15.26 (8.26 to 26.64)      | 14.58 (9.58 to 20.47)  | 0.03 (-0.06 to 0.12)   |
| Albania             | 119.15 (100.27 to 140.7)         | 116.19 (97.53 to 136.91)  | 0.01 (-0.06 to 0.09)   | 1.65 (0.90 to 2.05)         | 0.41 (0.27 to 0.61) | -5.17 (-6.14 to -4.19) | 110.06 (47.30 to 143.55)   | 36.18 (25.65 to 49.28) | -4.07 (-5.01 to -3.12) |
| Algeria             | 34.69 (30.01 to 40.15)           | 39.54 (32.16 to 48.88)    | 0.68 (0.53 to 0.83)    | 0.25 (0.17 to 0.37)         | 0.17 (0.13 to 0.23) | -1.14 (-1.23 to -1.04) | 11.17 (8.26 to 15.40)      | 9.93 (7.45 to 12.97)   | -0.28 (-0.38 to -0.17) |
| American Samoa      | 6.24 (5.14 to 7.41)              | 6.14 (5.03 to 7.38)       | -0.22 (-0.35 to -0.09) | 1.54 (0.89 to 2.28)         | 0.53 (0.37 to 0.90) | -4.40 (-4.80 to -4.01) | 44.49 (26.51 to 63.51)     | 15.67 (10.89 to 28.11) | -4.23 (-4.59 to -3.86) |
| Andorra             | 108.82 (91.32 to 128.78)         | 112.31 (94.3 to 132.64)   | 0.17 (0.11 to 0.22)    | 0.70 (0.49 to 1.00)         | 0.69 (0.41 to 1.01) | 0.03 (-0.06 to 0.13)   | 29.98 (22.66 to 38.91)     | 29.68 (20.92 to 39.03) | 0.02 (-0.03 to 0.07)   |
| Angola              | 7.20 (5.93 to 9.02)              | 8.85 (7.31 to 10.88)      | 0.59 (0.48 to 0.71)    | 0.73 (0.43 to 1.16)         | 0.62 (0.45 to 0.89) | -0.60 (-0.66 to -0.54) | 23.37 (11.91 to 42.94)     | 18.19 (12.6 to 26.15)  | -0.89 (-0.95 to -0.83) |
| Antigua and Barbuda | 31.33 (26.25 to 37.78)           | 31.79 (26.42 to 38.6)     | 0.10 (0.04 to 0.16)    | 0.95 (0.70 to 1.12)         | 0.67 (0.53 to 0.91) | -1.77 (-2.08 to -1.46) | 31.60 (24.03 to 36.76)     | 22.35 (17.9 to 28.99)  | -1.66 (-1.90 to -1.42) |
| Argentina           | 15.07 (12.24 to 17.99)           | 15.98 (13.09 to 19.42)    | 0.21 (0.19 to 0.23)    | 0.27 (0.24 to 0.30)         | 0.27 (0.23 to 0.31) | -0.10 (-0.25 to 0.04)  | 9.25 (8.00 to 10.66)       | 9.02 (7.72 to 10.63)   | -0.13 (-0.22 to -0.05) |
| Armenia             | 81.15 (67.51 to 95.76)           | 86.67 (72.86 to 104.56)   | 0.29 (0.26 to 0.32)    | 0.25 (0.19 to 0.30)         | 0.28 (0.21 to 0.34) | 0.72 (0.36 to 1.09)    | 19.99 (15.55 to 25.21)     | 20.5 (15.81 to 26.35)  | 0.20 (0.05 to 0.36)    |
| Australia           | 98.73 (82.47 to 116.23)          | 154.35 (134.91 to 175.51) | 1.00 (0.72 to 1.27)    | 0.54 (0.47 to 0.66)         | 0.78 (0.56 to 0.91) | 2.23 (1.81 to 2.66)    | 24.61 (19.22 to 31.12)     | 35.58 (27.28 to 45.33) | 1.20 (0.98 to 1.41)    |
| Austria             | 277.06 (243.01 to 307.67)        | 291.88 (260.14 to 327.43) | 0.19 (-0.09 to 0.46)   | 0.87 (0.77 to 1.13)         | 0.52 (0.43 to 0.81) | -1.59 (-2.15 to -1.03) | 61.71 (48.41 to 77.45)     | 54.31 (39.35 to 71.37) | -0.39 (-0.65 to -0.12) |
| Azerbaijan          | 76.23 (63.23 to 90.47)           | 81.93 (68.62 to 99.02)    | 0.35 (0.20 to 0.49)    | 0.22 (0.16 to 0.28)         | 0.16 (0.11 to 0.23) | -1.09 (-1.19 to -1.00) | 17.65 (13.27 to 23.02)     | 16.2 (11.65 to 21.65)  | -0.36 (-0.44 to -0.27) |
| Bahamas             | 32.77 (27.60 to 39.08)           | 28.72 (23.64 to 35.44)    | -0.27 (-0.39 to -0.15) | 0.59 (0.50 to 0.68)         | 0.49 (0.39 to 0.62) | -0.66 (-0.78 to -0.53) | 23.15 (19.78 to 26.78)     | 19.04 (15.33 to 23.86) | -0.72 (-0.81 to -0.63) |
| Bahrain             | 42.17 (36.27 to 48.42)           | 44.05 (36.4 to 53.11)     | 0.35 (0.18 to 0.51)    | 0.26 (0.20 to 0.33)         | 0.17 (0.13 to 0.22) | -1.34 (-1.69 to -0.99) | 11.98 (9.36 to 15.18)      | 10.05 (7.4 to 13.28)   | -0.53 (-0.63 to -0.43) |
| Bangladesh          | 17.19 (13.90 to 21.66)           | 21.62 (17.31 to 27)       | 0.65 (0.53 to 0.77)    | 1.00 (0.64 to 1.64)         | 0.56 (0.35 to 0.83) | -2.14 (-2.39 to -1.89) | 31.40 (20.47 to 45.16)     | 18.1 (12.11 to 25.27)  | -2.03 (-2.15 to -1.92) |
| Barbados            | 70.62 (59.14 to 84.46)           | 69.57 (58.9 to 83.59)     | 0.04 (-0.02 to 0.09)   | 0.42 (0.36 to 0.48)         | 0.38 (0.30 to 0.48) | -0.41 (-0.57 to -0.25) | 22.21 (18.13 to 27.15)     | 20.02 (15.56 to 25.32) | -0.42 (-0.48 to -0.36) |
| Belarus             | 82.25 (69.99 to 95.76)           | 87.85 (73.61 to 104.56)   | 0.38 (0.27 to 0.49)    | 0.36 (0.26 to 0.46)         | 0.38 (0.28 to 0.48) | 0.24 (0.09 to 0.39)    | 22.33 (16.76 to 27.90)     | 23.25 (17.89 to 28.61) | 0.17 (0.09 to 0.25)    |

|    |                 |               |               |               |               |               |               |              |               |               |
|----|-----------------|---------------|---------------|---------------|---------------|---------------|---------------|--------------|---------------|---------------|
| 1  |                 |               |               |               |               |               |               |              |               |               |
| 2  |                 |               |               |               |               |               |               |              |               |               |
| 3  |                 | to 96.97)     | to 104.11)    | 0.48)         | 0.48)         | 0.50)         | 0.39)         | to 28.89)    | to 29.87)     | 0.25)         |
| 4  |                 |               | 143.07        |               |               |               |               |              |               |               |
| 5  |                 | 83.42 (76.75  | (123.44 to    | 1.68 (1.42 to | 0.76 (0.67 to | 0.97 (0.76 to | 0.24 (-0.90   | 25.98 (21.36 | 36.56 (28.88  | 0.82 (0.35 to |
| 6  | Belgium         | to 90.48)     | 164.68)       | 1.94)         | 0.90)         | 1.12)         | to 1.40)      | to 31.07)    | to 45.93)     | 1.28)         |
| 7  |                 |               |               |               |               |               |               |              |               |               |
| 8  |                 |               |               |               |               |               |               |              |               |               |
| 9  | Belize          | 22.80 (18.88  | 24.31 (20.10  | 0.35 (0.25 to | 0.70 (0.48 to | 0.61 (0.50 to | -1.14 (-1.52  | 26.21 (19.11 | 21.80 (18.03  | -1.22 (-1.49  |
| 10 |                 | to 28.09)     | to 29.68)     | 0.45)         | 0.90)         | 0.80)         | to -0.76)     | to 32.42)    | to 27.26)     | to -0.95)     |
| 11 |                 |               |               |               |               |               |               |              |               |               |
| 12 | Benin           | 7.48 (6.20 to | 8.88 (7.27 to | 0.58 (0.47 to | 0.48 (0.26 to | 0.45 (0.30 to | -0.42 (-0.64  | 17.20 (8.03  | 15.67 (9.98   | -0.50 (-0.70  |
| 13 |                 | 9.10)         | 10.87)        | 0.69)         | 0.86)         | 0.65)         | to -0.20)     | to 28.30)    | to 22.61)     | to -0.30)     |
| 14 | Bermuda         | 34.26 (28.75  | 34.27 (28.46  | 0.17 (0.09 to | 0.89 (0.66 to | 0.36 (0.28 to | -3.73 (-4.07  | 28.26 (22.38 | 14.3 (11.3 to | -2.73 (-3.00  |
| 15 |                 | to 41.82)     | to 40.73)     | 0.25)         | 1.08)         | 0.50)         | to -3.40)     | to 33.89)    | 18.41)        | to -2.46)     |
| 16 |                 |               |               |               |               |               |               |              |               |               |
| 17 | Bhutan          | 16.74 (13.31  | 22.23 (18.11  | 1.24 (1.11 to | 0.68 (0.35 to | 0.55 (0.34 to | -0.84 (-0.97  | 21.23 (11.26 | 15.82 (10.39  | -1.18 (-1.27  |
| 18 |                 | to 21.03)     | to 27.62)     | 1.38)         | 1.53)         | 1.23)         | to -0.72)     | to 43.14)    | to 31.52)     | to -1.10)     |
| 19 | Bolivia         |               |               |               |               |               |               |              |               |               |
| 20 | (Plurinational  | 13.46 (11.31  | 13.54 (11.36  | 0.05 (0.00 to | 0.50 (0.27 to | 0.40 (0.30 to | -0.83 (-0.91  | 22.17 (10.30 | 12.73 (9.53   | -2.04 (-2.15  |
| 21 | State of)       | to 16.36)     | to 16.33)     | 0.10)         | 0.79)         | 0.52)         | to -0.75)     | to 41.41)    | to 16.38)     | to -1.94)     |
| 22 |                 |               |               |               |               |               |               |              |               |               |
| 23 | Bosnia and      | 102.41        | 122.38        |               |               |               |               |              |               |               |
| 24 | Herzegovina     | (88.37 to     | (107.08 to    | 0.58 (0.55 to | 0.46 (0.33 to | 0.45 (0.23 to | -0.20 (-0.52  | 27.68 (21.43 | 29.74 (21.21  | 0.14 (-0.01   |
| 25 |                 | 118.99)       | 140.67)       | 0.61)         | 0.58)         | 0.61)         | to 0.12)      | to 35.18)    | to 38.84)     | to 0.28)      |
| 26 |                 |               |               |               |               |               |               |              |               |               |
| 27 | Botswana        | 8.58 (7.14 to | 10.89 (8.88   | 0.60 (0.44 to | 0.70 (0.48 to | 0.64 (0.43 to | -0.77 (-1.15  | 20.94 (14.53 | 20.3 (13.14   | -0.41 (-0.71  |
| 28 |                 | 10.52)        | to 13.6)      | 0.76)         | 1.00)         | 0.89)         | to -0.39)     | to 29.34)    | to 30.81)     | to -0.11)     |
| 29 |                 |               |               |               |               |               |               |              |               |               |
| 30 | Brazil          | 65.87 (57.91  | 47.78 (41.6   | -0.87 (-1.09  | 0.48 (0.42 to | 0.45 (0.41 to | 0.01 (-0.16   | 23.70 (20.23 | 19.51 (16.72  | -0.44 (-0.62  |
| 31 |                 | to 74.92)     | to 54.51)     | to -0.65)     | 0.52)         | 0.52)         | to 0.19)      | to 27.67)    | to 22.74)     | to -0.27)     |
| 32 | Brunei          | 53.76 (43.58  | 57.28 (46.33  | 0.25 (0.24 to | 1.52 (1.08 to | 1.48 (0.97 to | 0.09 (-0.02   | 36.51 (27.84 | 32.76 (26.62  | -0.25 (-0.33  |
| 33 | Darussalam      | to 66.16)     | to 70.04)     | 0.27)         | 2.01)         | 1.89)         | to 0.20)      | to 47.59)    | to 39.71)     | to -0.18)     |
| 34 |                 |               |               |               |               |               |               |              |               |               |
| 35 | Bulgaria        | 127.47        | 120.16        | -0.16 (-0.29  | 0.26 (0.23 to | 0.33 (0.25 to | 1.13 (0.73 to | 28.31 (21.41 | 27.62 (20.56  | 0.00 (-0.21   |
| 36 |                 | (108.71 to    | (101.94 to    | to -0.03)     | 0.31)         | 0.41)         | 1.54)         | to 36.54)    | to 35.57)     | to 0.21)      |
| 37 |                 | 149.68)       | 142.65)       |               |               |               |               |              |               |               |
| 38 |                 |               |               |               |               |               |               |              |               |               |
| 39 | Burkina Faso    | 6.79 (5.57 to | 7.81 (6.46 to | 0.59 (0.41 to | 0.61 (0.37 to | 0.67 (0.38 to | 0.56 (0.28 to | 21.41 (10.66 | 22.52 (12.05  | 0.38 (0.15 to |
| 40 |                 | 8.47)         | 9.56)         | 0.77)         | 0.89)         | 1.00)         | 0.85)         | to 33.67)    | to 34.80)     | 0.62)         |
| 41 | Burundi         | 6.12 (5.03 to | 6.13 (5.06 to | -0.09 (-0.19  | 0.69 (0.45 to | 0.73 (0.46 to | 0.15 (-0.07   | 22.15 (14.22 | 20.85 (13.56  | -0.20 (-0.42  |
| 42 |                 | 7.50)         | 7.50)         | to 0.01)      | 1.02)         | 1.16)         | to 0.37)      | to 36.56)    | to 32.18)     | to 0.03)      |
| 43 |                 |               |               |               |               |               |               |              |               |               |
| 44 | Cabo Verde      | 10.12 (8.33   | 12.18 (9.88   | 0.76 (0.65 to | 0.33 (0.20 to | 0.25 (0.19 to | -2.05 (-2.56  | 12.86 (8.37  | 8.69 (6.98 to | -2.12 (-2.50  |
| 45 |                 | to 12.38)     | to 14.93)     | 0.88)         | 0.46)         | 0.33)         | to -1.54)     | to 17.33)    | 10.77)        | to -1.74)     |
| 46 |                 |               |               |               |               |               |               |              |               |               |
| 47 | Cambodia        | 3.02 (2.34 to | 3.77 (3.01 to | 0.65 (0.57 to | 0.50 (0.27 to | 0.35 (0.23 to | -1.44 (-1.54  | 14.51 (8.27  | 8.98 (6.42 to | -1.86 (-1.96  |
| 48 |                 | 3.74)         | 4.61)         | 0.72)         | 0.71)         | 0.45)         | to -1.34)     | to 21.45)    | 11.33)        | to -1.77)     |
| 49 | Cameroon        | 8.34 (6.88 to | 10.13 (8.33   | 0.79 (0.68 to | 0.54 (0.29 to | 0.38 (0.21 to | -1.69 (-1.94  | 18.12 (9.17  | 13.36 (7.77   | -1.43 (-1.66  |
| 50 |                 | 10.38)        | to 12.46)     | 0.90)         | 0.88)         | 0.59)         | to -1.43)     | to 27.57)    | to 21.03)     | to -1.20)     |
| 51 |                 |               |               |               |               |               |               |              |               |               |
| 52 | Canada          | 382.53        | 357.73        | 0.13 (-0.03   | 0.87 (0.77 to | 0.56 (0.46 to | -2.43 (-3.11  | 74.34 (56.49 | 64.91 (46.59  | -0.31 (-0.41  |
| 53 |                 | (367.54 to    | (323.05 to    | to 0.28)      | 0.97)         | 0.82)         | to -1.75)     | to 95.45)    | to 85.11)     | to -0.21)     |
| 54 |                 | 397.57)       | 393.88)       |               |               |               |               |              |               |               |
| 55 | Central African | 6.56 (5.39 to | 6.92 (5.75 to | 0.16 (0.14 to | 0.86 (0.55 to | 0.86 (0.53 to | 0.02 (-0.06   | 26.29 (16.24 | 25.47 (14.87  | -0.07 (-0.13  |
| 56 | Republic        | 8.20)         | 8.49)         | 0.18)         | 1.38)         | 1.36)         | to 0.10)      | to 42.90)    | to 41.50)     | to 0.00)      |
| 57 |                 |               |               |               |               |               |               |              |               |               |
| 58 | Chad            | 6.92 (5.73 to | 8.10 (6.65 to | 0.68 (0.57 to | 0.58 (0.32 to | 0.58 (0.39 to | -0.24 (-0.45  | 20.08 (9.86  | 19.16 (11.97  | -0.36 (-0.55  |
| 59 |                 | 8.53)         | 9.90)         | 0.80)         | 0.98)         | 0.84)         | to -0.04)     | to 32.61)    | to 27.44)     | to -0.16)     |
| 60 |                 |               |               |               |               |               |               |              |               |               |

|    |                 |                           |                           |                        |                     |                     |                        |                        |                        |                        |
|----|-----------------|---------------------------|---------------------------|------------------------|---------------------|---------------------|------------------------|------------------------|------------------------|------------------------|
| 1  |                 |                           |                           |                        |                     |                     |                        |                        |                        |                        |
| 2  |                 |                           |                           |                        |                     |                     |                        |                        |                        |                        |
| 3  |                 |                           |                           |                        |                     |                     |                        |                        |                        |                        |
| 4  | Chile           | 30.30 (25.82 to 35.36)    | 31.66 (27.25 to 36.7)     | 0.29 (-0.09 to 0.67)   | 0.46 (0.37 to 0.51) | 0.30 (0.26 to 0.38) | -1.75 (-2.10 to -1.40) | 16.52 (13.59 to 19.03) | 11.96 (9.91 to 14.48)  | -1.10 (-1.28 to -0.91) |
| 6  | China           | 22.85 (18.98 to 27.15)    | 47.06 (40.05 to 54.99)    | 2.80 (2.41 to 3.19)    | 0.86 (0.59 to 1.16) | 0.30 (0.24 to 0.35) | -4.11 (-4.50 to -3.71) | 24.47 (17.88 to 30.19) | 13.1 (10.29 to 16.31)  | -2.36 (-2.54 to -2.18) |
| 9  | Colombia        | 29.55 (24.81 to 34.95)    | 29.36 (24.89 to 34.88)    | -0.04 (-0.07 to -0.01) | 0.28 (0.25 to 0.31) | 0.29 (0.22 to 0.38) | 0.75 (0.38 to 1.12)    | 12.89 (10.91 to 15.21) | 12.53 (9.75 to 15.57)  | 0.36 (0.12 to 0.60)    |
| 12 | Comoros         | 7.33 (6.01 to 9.00)       | 7.78 (6.38 to 9.69)       | 0.36 (0.24 to 0.48)    | 0.83 (0.43 to 1.44) | 0.75 (0.48 to 1.19) | -0.51 (-0.67 to -0.36) | 23.44 (10.67 to 39.49) | 20.58 (13.10 to 30.54) | -0.63 (-0.84 to -0.41) |
| 14 | Congo           | 9.67 (7.93 to 11.87)      | 10.38 (8.57 to 12.74)     | 0.30 (0.16 to 0.45)    | 0.79 (0.56 to 1.16) | 0.66 (0.47 to 0.93) | -0.58 (-0.75 to -0.41) | 23.58 (16.35 to 34.61) | 18.36 (13.15 to 25.90) | -0.82 (-0.99 to -0.66) |
| 17 | Cook Islands    | 6.37 (5.18 to 7.65)       | 6.17 (5.09 to 7.51)       | -0.21 (-0.35 to -0.06) | 1.64 (1.17 to 2.20) | 0.81 (0.53 to 1.11) | -2.70 (-2.90 to -2.50) | 50.74 (35.37 to 72.08) | 24.94 (15.58 to 36.18) | -2.70 (-2.88 to -2.51) |
| 19 | Costa Rica      | 30.77 (25.88 to 36.60)    | 31.40 (26.47 to 37.15)    | 0.04 (0.03 to 0.05)    | 0.14 (0.12 to 0.16) | 0.20 (0.14 to 0.26) | 1.04 (0.82 to 1.26)    | 8.60 (6.81 to 10.81)   | 10.14 (7.74 to 12.91)  | 0.58 (0.47 to 0.69)    |
| 22 | Côte d'Ivoire   | 8.08 (6.58 to 9.97)       | 8.70 (7.15 to 10.96)      | 0.43 (0.34 to 0.52)    | 0.46 (0.23 to 0.80) | 0.40 (0.26 to 0.58) | -0.71 (-0.97 to -0.45) | 15.45 (7.59 to 24.88)  | 13.59 (8.56 to 19.48)  | -0.63 (-0.86 to -0.40) |
| 25 | Croatia         | 166.42 (155.48 to 178.41) | 203.79 (188.71 to 220.14) | 0.64 (0.57 to 0.70)    | 0.28 (0.24 to 0.42) | 0.41 (0.30 to 0.52) | 1.79 (1.42 to 2.17)    | 33.08 (24.90 to 42.82) | 41.30 (30.43 to 53.17) | 0.79 (0.65 to 0.93)    |
| 28 | Cuba            | 30.31 (25.30 to 36.52)    | 29.25 (23.94 to 35.26)    | -0.01 (-0.07 to 0.06)  | 0.35 (0.23 to 0.42) | 0.23 (0.18 to 0.29) | -2.04 (-2.48 to -1.60) | 14.22 (10.70 to 16.97) | 10.45 (8.37 to 12.94)  | -1.38 (-1.64 to -1.12) |
| 31 | Cyprus          | 42.09 (35.82 to 49.01)    | 58.44 (53.02 to 63.85)    | 0.98 (0.85 to 1.11)    | 2.09 (1.24 to 3.02) | 1.00 (0.76 to 1.32) | -3.13 (-3.45 to -2.81) | 36.43 (25.10 to 47.83) | 22.06 (17.95 to 26.41) | -2.26 (-2.48 to -2.03) |
| 34 | Czechia         | 85.23 (71.89 to 102.44)   | 152.02 (139.69 to 164.49) | 1.52 (1.33 to 1.71)    | 0.54 (0.49 to 0.63) | 0.56 (0.42 to 0.69) | 0.80 (0.45 to 1.15)    | 26.65 (21.98 to 32.43) | 35.40 (27.15 to 44.74) | 0.98 (0.90 to 1.06)    |
| 37 | Democratic      |                           |                           |                        |                     |                     |                        |                        |                        |                        |
| 38 | People's        |                           |                           |                        |                     |                     |                        |                        |                        |                        |
| 39 | Republic of     | 15.93 (13.23 to 19.03)    | 15.61 (12.96 to 18.71)    | -0.13 (-0.21 to -0.06) | 0.57 (0.33 to 0.82) | 0.41 (0.28 to 0.59) | -1.10 (-1.20 to -1.00) | 17.24 (9.70 to 27.63)  | 11.10 (8.17 to 14.58)  | -1.31 (-1.41 to -1.21) |
| 41 | Korea           |                           |                           |                        |                     |                     |                        |                        |                        |                        |
| 43 | Democratic      |                           |                           |                        |                     |                     |                        |                        |                        |                        |
| 44 | Republic of the | 8.50 (6.93 to 10.44)      | 7.80 (6.41 to 9.73)       | -0.45 (-0.71 to -0.20) | 0.71 (0.50 to 1.02) | 0.57 (0.40 to 0.82) | -0.78 (-0.91 to -0.64) | 21.69 (14.31 to 32.28) | 17.22 (12.20 to 24.09) | -0.82 (-0.97 to -0.66) |
| 45 | Congo           |                           |                           |                        |                     |                     |                        |                        |                        |                        |
| 46 |                 |                           |                           |                        |                     |                     |                        |                        |                        |                        |
| 47 | Denmark         | 232.13 (210.74 to 255.89) | 227.82 (208.42 to 250.75) | 0.47 (0.29 to 0.65)    | 0.53 (0.48 to 0.62) | 0.59 (0.50 to 0.68) | 0.01 (-0.61 to 0.63)   | 46.68 (35.05 to 59.60) | 45.17 (34.12 to 58.06) | 0.13 (-0.02 to 0.29)   |
| 50 | Djibouti        | 7.12 (5.93 to 8.73)       | 9.07 (7.45 to 11.07)      | 1.24 (1.04 to 1.45)    | 0.60 (0.37 to 1.07) | 0.54 (0.36 to 0.89) | -0.56 (-0.67 to -0.45) | 18.05 (10.87 to 32.37) | 15.83 (10.31 to 24.84) | -0.67 (-0.82 to -0.53) |
| 53 | Dominica        | 29.23 (24.60 to 35.45)    | 27.29 (22.61 to 33.47)    | -0.12 (-0.18 to -0.07) | 1.01 (0.79 to 1.23) | 0.76 (0.57 to 1.02) | -1.20 (-1.28 to -1.12) | 34.22 (27.47 to 41.24) | 26 (20.19 to 34.33)    | -1.17 (-1.27 to -1.07) |
| 55 | Dominican       |                           |                           |                        |                     |                     |                        |                        |                        |                        |
| 56 | Republic        | 25.16 (20.80 to 30.54)    | 24.19 (19.90 to 29.50)    | 0.16 (0.01 to 0.32)    | 0.24 (0.19 to 0.31) | 0.24 (0.17 to 0.32) | 0.09 (-0.13 to 0.32)   | 12.08 (9.46 to 15.94)  | 10.73 (7.96 to 13.99)  | -0.27 (-0.50 to -0.04) |
| 58 | Ecuador         | 17.02 (15.04 to 19.21)    | 19.97 (17.98 to 22.11)    | 0.49 (0.39 to 0.59)    | 0.23 (0.18 to 0.31) | 0.23 (0.17 to 0.30) | 0.55 (-0.03 to 1.13)   | 10.90 (8.22 to 13.94)  | 9.02 (6.84 to 11.09)   | -0.33 (-0.74 to 0.08)  |
| 59 |                 |                           |                           |                        |                     |                     |                        |                        |                        |                        |
| 60 |                 |                           |                           |                        |                     |                     |                        |                        |                        |                        |



|    |                   |                           |                           |                        |                     |                     |                        |                        |                        |                        |
|----|-------------------|---------------------------|---------------------------|------------------------|---------------------|---------------------|------------------------|------------------------|------------------------|------------------------|
| 1  |                   |                           |                           |                        |                     |                     |                        |                        |                        |                        |
| 2  |                   |                           |                           |                        |                     |                     |                        |                        |                        |                        |
| 3  |                   |                           |                           |                        |                     |                     |                        |                        |                        |                        |
| 4  | Egypt             | 39.84 (33.94 to 46.00)    | 44.48 (36.34 to 55.00)    | 0.26 (0.20 to 0.32)    | 0.22 (0.13 to 0.47) | 0.21 (0.12 to 0.35) | 0.32 (0.07 to 0.56)    | 11.25 (7.91 to 16.51)  | 11.49 (8.21 to 15.51)  | 0.19 (0.10 to 0.27)    |
| 6  | El Salvador       | 23.89 (19.87 to 28.45)    | 24.71 (20.64 to 29.14)    | 0.12 (0.05 to 0.19)    | 0.36 (0.23 to 0.45) | 0.14 (0.11 to 0.20) | -3.87 (-4.22 to -3.52) | 15.07 (11.16 to 18.78) | 7.25 (5.45 to 9.54)    | -2.87 (-3.18 to -2.56) |
| 9  | Equatorial Guinea | 7.11 (5.84 to 8.80)       | 10.89 (9.04 to 13.36)     | 1.66 (1.48 to 1.85)    | 0.76 (0.44 to 1.28) | 0.54 (0.33 to 0.86) | -1.45 (-1.60 to -1.30) | 23.13 (13.07 to 37.98) | 14.77 (9.26 to 22.66)  | -1.89 (-2.04 to -1.73) |
| 12 | Eritrea           | 6.35 (5.28 to 7.85)       | 6.98 (5.79 to 8.43)       | 0.26 (0.21 to 0.32)    | 0.61 (0.39 to 0.96) | 0.77 (0.52 to 1.12) | 0.71 (0.52 to 0.89)    | 20.05 (11.19 to 34.57) | 22.27 (15.26 to 32.30) | 0.34 (0.20 to 0.49)    |
| 15 | Estonia           | 71.59 (62.77 to 81.41)    | 103.71 (90.72 to 118.15)  | 1.12 (0.91 to 1.32)    | 0.55 (0.46 to 0.61) | 0.34 (0.26 to 0.47) | -2.35 (-2.68 to -2.02) | 28.55 (23.60 to 33.59) | 24.50 (18.49 to 31.62) | -1.07 (-1.32 to -0.81) |
| 18 | Eswatini          | 8.30 (6.84 to 10.21)      | 9.49 (7.76 to 11.68)      | 0.49 (0.39 to 0.58)    | 0.55 (0.33 to 0.83) | 0.60 (0.42 to 0.83) | 0.53 (0.14 to 0.91)    | 17.33 (9.97 to 26.06)  | 17.93 (12.43 to 25.37) | 0.38 (0.14 to 0.63)    |
| 21 | Ethiopia          | 5.88 (4.90 to 7.15)       | 6.78 (5.64 to 8.29)       | 0.53 (0.48 to 0.59)    | 0.84 (0.59 to 1.34) | 0.72 (0.42 to 1.07) | -0.67 (-0.82 to -0.52) | 26.74 (17.05 to 45.16) | 19.04 (11.93 to 28.10) | -1.33 (-1.48 to -1.18) |
| 23 | Fiji              | 4.78 (3.90 to 5.75)       | 4.70 (3.85 to 5.71)       | -0.12 (-0.34 to 0.09)  | 0.35 (0.26 to 0.45) | 0.26 (0.19 to 0.34) | -1.16 (-1.28 to -1.03) | 10.67 (8.31 to 13.70)  | 8.17 (5.94 to 10.77)   | -1.08 (-1.21 to -0.95) |
| 26 | Finland           | 162.00 (150.44 to 173.8)  | 286.76 (256.44 to 318.38) | 1.86 (1.78 to 1.94)    | 0.47 (0.35 to 0.55) | 0.29 (0.25 to 0.34) | -2.22 (-2.47 to -1.96) | 33.34 (25.19 to 43.04) | 47.57 (33.68 to 63.99) | 1.06 (0.98 to 1.14)    |
| 30 | France            | 96.03 (87.62 to 104.59)   | 136.71 (123.31 to 151.14) | 1.43 (1.34 to 1.53)    | 1.08 (0.93 to 1.20) | 1.21 (0.73 to 1.42) | 0.74 (0.46 to 1.02)    | 31.92 (26.78 to 37.48) | 39.44 (31.13 to 48.47) | 1.07 (0.94 to 1.20)    |
| 33 | Gabon             | 9.49 (7.90 to 11.62)      | 11.27 (9.27 to 13.92)     | 0.53 (0.51 to 0.56)    | 0.61 (0.41 to 0.96) | 0.53 (0.38 to 0.76) | -0.49 (-0.70 to -0.28) | 18.69 (12.11 to 28.60) | 15.27 (10.62 to 21.51) | -0.71 (-0.88 to -0.54) |
| 36 | Gambia            | 8.70 (7.11 to 10.56)      | 8.81 (7.23 to 10.96)      | -0.10 (-0.21 to 0.01)  | 0.58 (0.34 to 0.92) | 0.44 (0.29 to 0.60) | -1.52 (-1.81 to -1.24) | 19.12 (10.73 to 31.19) | 14.25 (9.59 to 19.10)  | -1.56 (-1.85 to -1.28) |
| 39 | Georgia           | 84.45 (71.53 to 99.72)    | 87.97 (73.75 to 104.83)   | 0.15 (0.08 to 0.22)    | 0.29 (0.18 to 0.39) | 0.29 (0.19 to 0.37) | 0.18 (-1.12 to 1.50)   | 20.37 (15.24 to 26.41) | 20.25 (15.35 to 26.28) | 0.02 (-0.38 to 0.41)   |
| 42 | Germany           | 104.26 (89.74 to 121.91)  | 214.93 (188.62 to 243.64) | 1.09 (0.54 to 1.64)    | 0.96 (0.79 to 1.60) | 1.94 (1.46 to 2.20) | 3.73 (3.26 to 4.20)    | 35.51 (28.44 to 47.28) | 64.06 (51.49 to 77.71) | 1.80 (1.57 to 2.02)    |
| 45 | Ghana             | 10.54 (8.69 to 12.71)     | 12.26 (10.11 to 14.88)    | 0.73 (0.63 to 0.83)    | 0.70 (0.35 to 1.24) | 0.55 (0.31 to 0.82) | -0.97 (-1.23 to -0.70) | 24.11 (11.81 to 39.44) | 18.5 (10.85 to 26.95)  | -1.02 (-1.27 to -0.77) |
| 48 | Greece            | 97.92 (82.43 to 113.83)   | 78.66 (70.88 to 87.04)    | -0.98 (-1.20 to -0.75) | 0.26 (0.22 to 0.30) | 0.23 (0.19 to 0.27) | -0.36 (-0.92 to 0.20)  | 19.2 (14.17 to 25.49)  | 15.88 (11.92 to 20.55) | -0.78 (-0.85 to -0.71) |
| 51 | Greenland         | 144.67 (122.01 to 170.01) | 163.39 (138.74 to 188.49) | 0.34 (0.27 to 0.40)    | 0.57 (0.45 to 0.71) | 0.74 (0.38 to 0.96) | 1.07 (0.80 to 1.34)    | 34.12 (26.01 to 44.17) | 38.3 (28.36 to 50.15)  | 0.36 (0.24 to 0.47)    |
| 54 | Grenada           | 24.13 (19.74 to 29.02)    | 24.31 (20.03 to 30.13)    | 0.03 (-0.05 to 0.12)   | 1.34 (1.06 to 1.62) | 1.24 (1.03 to 1.52) | -0.55 (-0.68 to -0.41) | 44.27 (36.58 to 52.74) | 38.43 (32.58 to 46.61) | -0.64 (-0.73 to -0.56) |
| 57 | Guam              | 6.83 (5.65 to 8.11)       | 6.54 (5.35 to 7.82)       | -0.18 (-0.35 to -0.01) | 0.33 (0.26 to 0.42) | 0.16 (0.12 to 0.23) | -3.00 (-3.55 to -2.45) | 9.01 (7.19 to 11.32)   | 5.39 (4.11 to 7.68)    | -2.12 (-2.65 to -1.59) |
| 59 | Guatemala         | 21.60 (18.10 to 24.10)    | 23.54 (19.84 to 27.24)    | 0.29 (0.25 to 0.33)    | 0.25 (0.18 to 0.32) | 0.29 (0.22 to 0.36) | 1.32 (0.72 to 1.92)    | 11.81 (8.36 to 15.26)  | 11.99 (9.52 to 14.46)  | 0.71 (0.18 to 1.24)    |
| 60 |                   |                           |                           |                        |                     |                     |                        |                        |                        |                        |



|    |               |               |               |               |               |               |               |               |              |               |
|----|---------------|---------------|---------------|---------------|---------------|---------------|---------------|---------------|--------------|---------------|
| 1  |               |               |               |               |               |               |               |               |              |               |
| 2  |               |               |               |               |               |               |               |               |              |               |
| 3  |               | to 26.13)     | to 28.11)     | 0.32)         | 0.38)         | 0.37)         | 1.92)         | to 18.2)      | to 14.91)    | 1.24)         |
| 4  |               | 7.53 (6.18 to | 8.61 (7.06 to | 0.61 (0.49 to | 0.43 (0.18 to | 0.40 (0.21 to | -0.36 (-0.50  | 16.9 (6.31 to | 14.41 (7.36  | -0.58 (-0.70  |
| 5  | Guinea        | 9.35)         | 10.53)        | 0.74)         | 0.86)         | 0.60)         | to -0.22)     | 29.14)        | to 21.95)    | to -0.47)     |
| 6  |               | 7.32 (5.99 to | 8.43 (6.92 to | 0.63 (0.50 to | 0.75 (0.36 to | 0.61 (0.4 to  | -0.81 (-0.93  | 26.39 (11.34  | 20.54 (12.76 | -0.94 (-1.07  |
| 7  |               | 9.06)         | 10.32)        | 0.76)         | 1.18)         | 0.85)         | to -0.68)     | to 44.49)     | to 28.9)     | to -0.80)     |
| 8  | Guinea-Bissau | 23.56 (19.43  | 22.95 (18.93  | 0.06 (-0.03   | 1.19 (0.97 to | 1.02 (0.76 to | -0.53 (-0.70  | 40.69 (32.87  | 35.43 (26.51 | -0.46 (-0.59  |
| 9  |               | to 28.53)     | to 28.26)     | to 0.15)      | 1.41)         | 1.33)         | to -0.35)     | to 48.37)     | to 46.07)    | to -0.32)     |
| 10 | Guyana        | 20.11 (16.54  | 19.43 (16.14  | 0.07 (-0.03   | 1.41 (0.74 to | 1.08 (0.61 to | -0.77 (-0.89  | 52.02 (22.41  | 36.86 (19.94 | -0.94 (-1.12  |
| 11 |               | to 24.88)     | to 24.31)     | to 0.17)      | 2.12)         | 1.59)         | to -0.65)     | to 92.43)     | to 54.22)    | to -0.77)     |
| 12 | Haiti         | 22.83 (18.97  | 23.93 (19.84  | 0.18 (0.14 to | 0.72 (0.46 to | 0.83 (0.51 to | 0.87 (0.73 to | 28.54 (19.06  | 24.37 (15.88 | -0.38 (-0.43  |
| 13 |               | to 27.11)     | to 28.49)     | 0.23)         | 0.99)         | 1.15)         | 1.02)         | to 38.67)     | to 32.67)    | to -0.32)     |
| 14 | Honduras      | 199.20        | 332.82        | 2.13 (1.78 to | 0.64 (0.58 to | 0.56 (0.45 to | -0.62 (-1.04  | 48.33 (38.31  | 64.34 (47.69 | 1.15 (0.85 to |
| 15 |               | (181.71 to    | (309.79 to    | 2.48)         | 0.82)         | 0.71)         | to -0.20)     | to 59.55)     | to 82.55)    | 1.46)         |
| 16 | Hungary       | 219.68)       | 356.72)       |               |               |               |               |               |              |               |
| 17 |               | 136.42        | 210.18        | 0.84 (0.59 to | 0.67 (0.57 to | 0.65 (0.51 to | 0.14 (-0.01   | 33.49 (26.34  | 42.38 (31.83 | 0.47 (0.33 to |
| 18 | Iceland       | (115.41 to    | (180.43 to    | 1.09)         | 0.78)         | 0.75)         | to 0.29)      | to 42.36)     | to 54.83)    | 0.62)         |
| 19 |               | 161.21)       | 243.51)       |               |               |               |               |               |              |               |
| 20 | India         | 20.68 (16.76  | 20.34 (16.57  | 0.18 (-0.03   | 0.63 (0.43 to | 0.40 (0.29 to | -1.93 (-2.11  | 20.11 (13.58  | 13.04 (9.44  | -1.73 (-1.86  |
| 21 |               | to 25.67)     | to 24.97)     | to 0.38)      | 0.91)         | 0.53)         | to -1.74)     | to 26.72)     | to 16.5)     | to -1.61)     |
| 22 | Indonesia     | 3.37 (2.70 to | 4.16 (3.37 to | 0.74 (0.60 to | 0.77 (0.37 to | 0.55 (0.33 to | -1.42 (-1.56  | 19.48 (11.70  | 11.66 (8.16  | -2.04 (-2.17  |
| 23 |               | 4.07)         | 5.00)         | 0.88)         | 1.04)         | 0.70)         | to -1.29)     | to 24.6)      | to 14.98)    | to -1.91)     |
| 24 | Iran (Islamic | 41.07 (33.51  | 44.80 (36.70  | 0.29 (0.02 to | 0.22 (0.12 to | 0.19 (0.08 to | -0.11 (-0.64  | 11.09 (8.34   | 11.03 (7.60  | 0.12 (-0.02   |
| 25 | Republic of)  | to 50.84)     | to 55.07)     | 0.57)         | 0.34)         | 0.24)         | to 0.42)      | to 14.22)     | to 14.22)    | to 0.25)      |
| 26 |               | 19.71 (16.52  | 28.11 (23.22  | 1.43 (1.27 to | 0.29 (0.20 to | 0.19 (0.15 to | -1.58 (-1.76  | 13.75 (9.61   | 10.42 (8.08  | -0.96 (-1.14  |
| 27 | Iraq          | to 23.39)     | to 34.20)     | 1.59)         | 0.42)         | 0.27)         | to -1.39)     | to 19.18)     | to 13.32)    | to -0.78)     |
| 28 |               | 90.59 (75.89  | 97.87 (84.83  | 0.42 (0.35 to | 0.87 (0.76 to | 0.66 (0.53 to | -1.61 (-2.56  | 29.44 (24.40  | 25.50 (20.1  | -0.80 (-1.30  |
| 29 | Ireland       | to 107.72)    | to 112.53)    | 0.49)         | 0.96)         | 0.84)         | to -0.66)     | to 35.63)     | to 32.09)    | to -0.30)     |
| 30 |               | 70.49 (59.79  | 70.21 (62.42  | -0.08 (-0.20  | 0.47 (0.41 to | 0.38 (0.32 to | -1.01 (-1.36  | 21.15 (17.17  | 18.50 (14.69 | -0.65 (-0.76  |
| 31 | Israel        | to 83.85)     | to 78.72)     | to 0.05)      | 0.53)         | 0.51)         | to -0.66)     | to 26.12)     | to 23.20)    | to -0.54)     |
| 32 |               | 261.58        | 227.51        | -0.24 (-0.43  | 0.44 (0.39 to | 0.76 (0.55 to | 2.55 (2.03 to | 49.44 (36.73  | 46.95 (35.41 | 0.17 (0.00 to |
| 33 | Italy         | (226.94 to    | (200.83 to    | to -0.05)     | 0.70)         | 0.85)         | 3.06)         | to 63.71)     | to 59.78)    | 0.34)         |
| 34 |               | 297.14)       | 254.27)       |               |               |               |               |               |              |               |
| 35 | Jamaica       | 29.63 (24.88  | 29.42 (24.46  | 0.15 (0.05 to | 0.30 (0.23 to | 0.24 (0.17 to | -1.45 (-1.78  | 14.86 (11.53  | 11.50 (8.84  | -1.28 (-1.50  |
| 36 |               | to 35.60)     | to 35.27)     | 0.25)         | 0.35)         | 0.33)         | to -1.12)     | to 17.70)     | to 14.50)    | to -1.06)     |
| 37 |               | 151.17        | 291.90        | 1.48 (1.08 to | 0.25 (0.18 to | 0.11 (0.09 to | -2.39 (-2.83  | 27.14 (19.46  | 46.58 (31.41 | 1.21 (0.88 to |
| 38 | Japan         | (125.74 to    | (251.75 to    | 1.88)         | 0.27)         | 0.16)         | to -1.95)     | to 36.26)     | to 63.54)    | 1.54)         |
| 39 |               | 179.69)       | 336.57)       |               |               |               |               |               |              |               |
| 40 |               | 69.20 (60.07  | 113.51        | 2.51 (2.23 to | 0.43 (0.30 to | 0.23 (0.18 to | -2.62 (-2.98  | 20.68 (15.47  | 22.01 (16.06 | 0.46 (0.34 to |
| 41 | Jordan        | to 79.85)     | (95.78 to     | 2.79)         | 0.59)         | 0.30)         | to -2.26)     | to 26.15)     | to 29.65)    | 0.58)         |
| 42 |               |               | 133.87)       |               |               |               |               |               |              |               |
| 43 | Kazakhstan    | 80.02 (67.16  | 81.77 (68.13  | 0.12 (0.06 to | 0.57 (0.41 to | 0.46 (0.37 to | -1.26 (-1.68  | 30.23 (24.06  | 26.97 (21.78 | -0.74 (-1.02  |
| 44 |               | to 96.26)     | to 97.46)     | 0.18)         | 0.72)         | 0.56)         | to -0.85)     | to 37.42)     | to 33.61)    | to -0.45)     |
| 45 |               | 6.80 (5.68 to | 8.33 (6.99 to | 0.31 (0.19 to | 0.81 (0.43 to | 0.84 (0.50 to | 0.31 (0.22 to | 21.25 (13.20  | 21.31 (13.76 | 0.26 (0.16 to |
| 46 | Kenya         | 8.23)         | 10.12)        | 0.42)         | 1.44)         | 1.26)         | 0.40)         | to 36.93)     | to 30.78)    | 0.36)         |
| 47 |               |               |               |               |               |               |               |               |              |               |
| 48 |               |               |               |               |               |               |               |               |              |               |
| 49 |               |               |               |               |               |               |               |               |              |               |
| 50 |               |               |               |               |               |               |               |               |              |               |
| 51 |               |               |               |               |               |               |               |               |              |               |
| 52 |               |               |               |               |               |               |               |               |              |               |
| 53 |               |               |               |               |               |               |               |               |              |               |
| 54 |               |               |               |               |               |               |               |               |              |               |
| 55 |               |               |               |               |               |               |               |               |              |               |
| 56 |               |               |               |               |               |               |               |               |              |               |
| 57 |               |               |               |               |               |               |               |               |              |               |
| 58 |               |               |               |               |               |               |               |               |              |               |
| 59 |               |               |               |               |               |               |               |               |              |               |
| 60 |               |               |               |               |               |               |               |               |              |               |

|    |                                  |                           |                           |                        |                     |                     |                        |                        |                        |                        |
|----|----------------------------------|---------------------------|---------------------------|------------------------|---------------------|---------------------|------------------------|------------------------|------------------------|------------------------|
| 1  |                                  |                           |                           |                        |                     |                     |                        |                        |                        |                        |
| 2  |                                  |                           |                           |                        |                     |                     |                        |                        |                        |                        |
| 3  |                                  |                           |                           |                        |                     |                     |                        |                        |                        |                        |
| 4  | Kiribati                         | 4.05 (3.25 to 4.96)       | 3.55 (2.90 to 4.32)       | -0.69 (-0.88 to -0.51) | 1.81 (0.99 to 2.71) | 1.08 (0.68 to 1.67) | -2.13 (-2.29 to -1.98) | 53.42 (24.47 to 92.59) | 31.83 (17.58 to 55.40) | -2.07 (-2.20 to -1.93) |
| 6  | Kuwait                           | 55.67 (51.70 to 60.02)    | 54.34 (45.07 to 65.64)    | 0.09 (-0.06 to 0.25)   | 0.19 (0.14 to 0.22) | 0.15 (0.12 to 0.20) | -0.66 (-1.06 to -0.25) | 13.39 (10.47 to 16.77) | 11.73 (8.74 to 15.53)  | -0.33 (-0.50 to -0.15) |
| 9  | Kyrgyzstan                       | 73.48 (61.75 to 87.12)    | 73.31 (61.61 to 87.09)    | -0.03 (-0.10 to 0.04)  | 0.42 (0.29 to 0.50) | 0.19 (0.16 to 0.25) | -3.52 (-3.86 to -3.19) | 28 (21.04 to 34.06)    | 17.37 (13.34 to 22.37) | -2.11 (-2.28 to -1.94) |
| 11 | Lao People's Democratic Republic | 2.98 (2.32 to 3.69)       | 3.67 (2.95 to 4.55)       | 0.79 (0.74 to 0.83)    | 0.45 (0.22 to 0.72) | 0.26 (0.14 to 0.41) | -2.40 (-2.60 to -2.19) | 13.04 (6.62 to 19.19)  | 6.97 (4.13 to 11.24)   | -2.47 (-2.65 to -2.30) |
| 16 | Latvia                           | 103.47 (89.32 to 119.13)  | 123.78 (108.48 to 139.23) | 0.42 (0.33 to 0.50)    | 0.34 (0.29 to 0.42) | 0.37 (0.30 to 0.48) | 0.22 (-0.08 to 0.51)   | 25.74 (20.10 to 32.35) | 28.66 (21.84 to 36.61) | 0.14 (-0.02 to 0.29)   |
| 19 | Lebanon                          | 33.16 (27.13 to 41.07)    | 46.20 (37.84 to 56.68)    | 1.23 (1.00 to 1.47)    | 0.14 (0.10 to 0.21) | 0.15 (0.08 to 0.23) | 0.32 (0.10 to 0.55)    | 8.48 (6.32 to 11.24)   | 10.18 (7.34 to 13.75)  | 0.79 (0.65 to 0.93)    |
| 22 | Lesotho                          | 7.67 (6.36 to 9.34)       | 8.77 (7.23 to 10.83)      | 0.48 (0.40 to 0.57)    | 0.55 (0.36 to 0.8)  | 0.69 (0.48 to 0.98) | 1.08 (0.85 to 1.31)    | 16.56 (10.77 to 23.28) | 20.29 (13.61 to 29.06) | 1.06 (0.87 to 1.26)    |
| 24 | Liberia                          | 7.84 (6.42 to 9.75)       | 8.46 (6.99 to 10.34)      | 0.57 (0.33 to 0.80)    | 0.52 (0.23 to 0.92) | 0.42 (0.26 to 0.62) | -0.84 (-1.09 to -0.60) | 19.69 (7.54 to 32.92)  | 13.96 (8.48 to 21.59)  | -1.16 (-1.44 to -0.88) |
| 27 | Libya                            | 23.56 (19.39 to 28.73)    | 25.77 (21.21 to 31.41)    | 0.56 (0.29 to 0.84)    | 0.21 (0.13 to 0.37) | 0.22 (0.15 to 0.31) | 0.11 (-0.02 to 0.24)   | 8.88 (6.41 to 12.85)   | 9.05 (6.69 to 11.82)   | 0.21 (0.11 to 0.31)    |
| 30 | Lithuania                        | 109.21 (95.7 to 123.65)   | 133.41 (123.84 to 142.65) | 0.84 (0.76 to 0.92)    | 0.32 (0.24 to 0.37) | 0.33 (0.26 to 0.42) | 0.13 (-0.20 to 0.47)   | 25.36 (19.61 to 31.92) | 28.75 (21.98 to 36.27) | 0.49 (0.33 to 0.65)    |
| 34 | Luxembourg                       | 166.34 (145.24 to 189.85) | 187.63 (163.86 to 213.76) | 0.37 (0.22 to 0.53)    | 0.96 (0.84 to 1.10) | 0.97 (0.72 to 1.16) | 0.55 (0.30 to 0.80)    | 42.53 (33.57 to 52.29) | 43.90 (33.95 to 55.68) | 0.27 (0.15 to 0.38)    |
| 37 | Madagascar                       | 6.62 (5.44 to 8.22)       | 7.25 (5.99 to 9.04)       | 0.38 (0.29 to 0.48)    | 0.53 (0.32 to 0.88) | 0.59 (0.40 to 0.88) | 0.45 (0.34 to 0.56)    | 17.91 (8.95 to 28.15)  | 16.98 (11.97 to 24.64) | -0.03 (-0.18 to 0.13)  |
| 40 | Malawi                           | 5.73 (4.70 to 7.05)       | 6.33 (5.28 to 7.8)        | 0.44 (0.40 to 0.48)    | 0.71 (0.49 to 1.02) | 0.67 (0.46 to 0.97) | -0.26 (-0.39 to -0.12) | 24.10 (13.49 to 42.83) | 19.08 (13.47 to 26.73) | -0.85 (-1.02 to -0.69) |
| 43 | Malaysia                         | 4.33 (3.64 to 5.05)       | 6.56 (5.71 to 7.56)       | 1.38 (1.19 to 1.57)    | 0.18 (0.14 to 0.22) | 0.17 (0.12 to 0.23) | -0.75 (-1.06 to -0.43) | 5.01 (4.15 to 6.10)    | 4.92 (3.71 to 6.26)    | -0.54 (-0.73 to -0.35) |
| 45 | Maldives                         | 4.10 (3.25 to 4.98)       | 4.94 (3.96 to 5.96)       | 0.74 (0.68 to 0.80)    | 0.53 (0.32 to 0.81) | 0.30 (0.23 to 0.40) | -2.37 (-2.52 to -2.22) | 13.21 (8.16 to 20.38)  | 7.20 (5.69 to 9.23)    | -2.50 (-2.68 to -2.32) |
| 48 | Mali                             | 7.19 (5.85 to 8.93)       | 8.08 (6.68 to 9.79)       | 0.63 (0.48 to 0.79)    | 0.49 (0.20 to 0.89) | 0.47 (0.26 to 0.71) | -0.28 (-0.46 to -0.10) | 19.25 (6.81 to 33.36)  | 16.53 (8.45 to 26.83)  | -0.64 (-0.80 to -0.48) |
| 50 | Malta                            | 66.69 (57.4 to 76.82)     | 72.00 (63.55 to 81.87)    | 0.11 (0.05 to 0.17)    | 0.54 (0.48 to 0.62) | 0.62 (0.48 to 0.74) | 0.78 (0.57 to 0.99)    | 20.61 (16.77 to 24.94) | 22.28 (18.12 to 27.35) | 0.40 (0.30 to 0.50)    |
| 53 | Marshall Islands                 | 4.22 (3.40 to 5.11)       | 4.10 (3.35 to 4.93)       | -0.25 (-0.43 to -0.08) | 1.32 (0.84 to 1.88) | 0.83 (0.50 to 1.31) | -1.90 (-2.04 to -1.76) | 38.63 (23.47 to 58.16) | 24.94 (14.63 to 40.72) | -1.80 (-1.93 to -1.68) |
| 56 | Mauritania                       | 8.95 (7.32 to 10.94)      | 11.87 (9.73 to 14.62)     | 0.85 (0.70 to 0.99)    | 0.68 (0.41 to 0.99) | 0.41 (0.28 to 0.57) | -2.01 (-2.18 to -1.84) | 22.06 (12.99 to 31.74) | 13.42 (9.08 to 18.70)  | -1.97 (-2.14 to -1.80) |
| 58 | Mauritius                        | 4.55 (3.68 to 5.63)       | 5.50 (4.43 to 6.63)       | 0.68 (0.63 to 0.73)    | 0.17 (0.14 to 0.19) | 0.22 (0.17 to 0.28) | 1.44 (1.10 to 1.78)    | 5.3 (4.63 to 6.29)     | 7.7 (5.86 to 9.69)     | 1.88 (1.53 to 2.23)    |

|    |             |                        |                        |                        |                     |                     |                        |                        |                        |                        |
|----|-------------|------------------------|------------------------|------------------------|---------------------|---------------------|------------------------|------------------------|------------------------|------------------------|
| 1  |             |                        |                        |                        |                     |                     |                        |                        |                        |                        |
| 2  |             |                        |                        |                        |                     |                     |                        |                        |                        |                        |
| 3  |             |                        |                        |                        |                     |                     |                        |                        |                        |                        |
| 4  | Mexico      | 47.30 (40.55 to 55.27) | 36.92 (31.76 to 42.73) | -0.82 (-0.97 to -0.67) | 0.34 (0.31 to 0.39) | 0.45 (0.36 to 0.54) | 1.68 (1.33 to 2.02)    | 16.08 (13.61 to 19.12) | 17.13 (14.12 to 20.45) | 0.68 (0.41 to 0.96)    |
| 5  |             |                        |                        |                        |                     |                     |                        |                        |                        |                        |
| 6  | Micronesia  |                        |                        |                        |                     |                     |                        |                        |                        |                        |
| 7  | (Federated  | 4.44 (3.61 to 5.35)    | 4.11 (3.40 to 4.96)    | -0.45 (-0.62 to -0.27) | 1.36 (0.88 to 1.97) | 0.80 (0.48 to 1.32) | -2.09 (-2.29 to -1.88) | 40.59 (25.23 to 65.57) | 23.88 (12.56 to 43.11) | -2.07 (-2.24 to -1.89) |
| 8  | States of)  |                        |                        |                        |                     |                     |                        |                        |                        |                        |
| 9  |             |                        |                        |                        |                     |                     |                        |                        |                        |                        |
| 10 |             | 102.48                 | 110.59                 |                        |                     |                     |                        |                        |                        |                        |
| 11 | Monaco      | (86.41 to 120.82)      | (93.15 to 130.73)      | 0.31 (0.29 to 0.33)    | 0.38 (0.27 to 0.50) | 0.36 (0.27 to 0.47) | -0.07 (-0.15 to 0.01)  | 22.98 (17.18 to 30.02) | 23.10 (17.08 to 29.93) | 0.08 (0.06 to 0.10)    |
| 12 |             |                        |                        |                        |                     |                     |                        |                        |                        |                        |
| 13 |             |                        |                        |                        |                     |                     |                        |                        |                        |                        |
| 14 | Mongolia    | 68.37 (56.95 to 82.11) | 69.72 (57.44 to 83.84) | 0.02 (0.01 to 0.04)    | 0.73 (0.47 to 1.01) | 0.45 (0.33 to 0.61) | -2.10 (-2.26 to -1.94) | 38.19 (25.22 to 51.55) | 24.75 (19.13 to 31.11) | -1.88 (-2.00 to -1.75) |
| 15 |             |                        |                        |                        |                     |                     |                        |                        |                        |                        |
| 16 |             | 135.02                 | 133.80                 |                        |                     |                     |                        |                        |                        |                        |
| 17 | Montenegro  | (114.64 to 158.46)     | (112.95 to 156.37)     | 0.02 (0.00 to 0.05)    | 0.29 (0.23 to 0.37) | 0.30 (0.23 to 0.37) | 0.27 (0.08 to 0.46)    | 29.84 (22.66 to 38.5)  | 28.38 (20.94 to 37.02) | -0.08 (-0.14 to -0.02) |
| 18 |             |                        |                        |                        |                     |                     |                        |                        |                        |                        |
| 19 |             |                        |                        |                        |                     |                     |                        |                        |                        |                        |
| 20 | Morocco     | 15.56 (13.00 to 18.49) | 17.60 (14.69 to 21.00) | 0.60 (0.47 to 0.72)    | 0.23 (0.14 to 0.38) | 0.21 (0.15 to 0.28) | -0.17 (-0.38 to 0.04)  | 8.23 (5.69 to 11.59)   | 7.60 (5.86 to 9.68)    | -0.09 (-0.21 to 0.02)  |
| 21 |             |                        |                        |                        |                     |                     |                        |                        |                        |                        |
| 22 |             |                        |                        |                        |                     |                     |                        |                        |                        |                        |
| 23 | Mozambique  | 5.71 (4.71 to 7.03)    | 6.30 (5.22 to 7.69)    | 0.38 (0.33 to 0.43)    | 0.69 (0.45 to 1.04) | 0.84 (0.58 to 1.20) | 0.94 (0.77 to 1.12)    | 22.30 (13.46 to 36.57) | 24.35 (16.57 to 34.27) | 0.62 (0.41 to 0.84)    |
| 24 |             |                        |                        |                        |                     |                     |                        |                        |                        |                        |
| 25 |             |                        |                        |                        |                     |                     |                        |                        |                        |                        |
| 26 | Myanmar     | 3.09 (2.42 to 3.79)    | 3.71 (3.00 to 4.59)    | 0.72 (0.63 to 0.81)    | 0.22 (0.13 to 0.31) | 0.13 (0.1 to 0.17)  | -1.95 (-2.07 to -1.83) | 7.97 (4.53 to 12.88)   | 4.34 (3.28 to 6.04)    | -2.29 (-2.41 to -2.17) |
| 27 |             |                        |                        |                        |                     |                     |                        |                        |                        |                        |
| 28 | Namibia     | 9.39 (7.72 to 11.59)   | 11.47 (9.48 to 14.12)  | 0.66 (0.54 to 0.77)    | 0.72 (0.50 to 1.00) | 0.63 (0.45 to 0.87) | -0.61 (-0.80 to -0.41) | 21.26 (13.8 to 28.84)  | 18.09 (12.71 to 26.34) | -0.52 (-0.63 to -0.41) |
| 29 |             |                        |                        |                        |                     |                     |                        |                        |                        |                        |
| 30 |             |                        |                        |                        |                     |                     |                        |                        |                        |                        |
| 31 | Nauru       | 5.33 (4.35 to 6.41)    | 5.02 (4.11 to 6.11)    | -0.61 (-0.94 to -0.28) | 1.37 (0.82 to 2.13) | 0.92 (0.54 to 1.45) | -1.85 (-2.09 to -1.61) | 42.03 (22.9 to 73.19)  | 27.18 (13.97 to 47.82) | -1.87 (-2.08 to -1.65) |
| 32 |             |                        |                        |                        |                     |                     |                        |                        |                        |                        |
| 33 |             |                        |                        |                        |                     |                     |                        |                        |                        |                        |
| 34 | Nepal       | 16.18 (12.92 to 20.54) | 18.72 (15.04 to 23.18) | 0.55 (0.50 to 0.59)    | 0.98 (0.57 to 1.86) | 0.59 (0.36 to 0.98) | -1.88 (-2.06 to -1.69) | 28.52 (18.28 to 47.84) | 15.65 (10.93 to 23.88) | -2.15 (-2.36 to -1.94) |
| 35 |             |                        |                        |                        |                     |                     |                        |                        |                        |                        |
| 36 |             | 142.28                 |                        |                        |                     |                     |                        |                        |                        |                        |
| 37 | Netherlands | (129.20 to 155.78)     | 73.64 (63.08 to 85.72) | -2.19 (-2.78 to -1.60) | 1.43 (1.24 to 1.75) | 2.08 (1.58 to 2.40) | 1.35 (0.87 to 1.84)    | 47.17 (39.07 to 56.59) | 41.11 (35.20 to 47.09) | -0.50 (-0.93 to -0.06) |
| 38 |             |                        |                        |                        |                     |                     |                        |                        |                        |                        |
| 39 |             |                        |                        |                        |                     |                     |                        |                        |                        |                        |
| 40 |             | 160.29                 | 168.32                 |                        |                     |                     |                        |                        |                        |                        |
| 41 | New Zealand | (139.19 to 182.59)     | (152.62 to 186.95)     | 0.20 (0.15 to 0.26)    | 0.53 (0.45 to 0.59) | 0.38 (0.32 to 0.46) | -1.70 (-2.05 to -1.34) | 34.31 (26.39 to 43.21) | 31.98 (23.24 to 41.73) | -0.32 (-0.42 to -0.22) |
| 42 |             |                        |                        |                        |                     |                     |                        |                        |                        |                        |
| 43 |             |                        |                        |                        |                     |                     |                        |                        |                        |                        |
| 44 | Nicaragua   | 23.25 (19.28 to 27.88) | 26.41 (22.30 to 31.28) | 0.20 (0.10 to 0.31)    | 0.15 (0.12 to 0.18) | 0.17 (0.13 to 0.21) | 0.48 (0.30 to 0.67)    | 7.80 (6.25 to 9.75)    | 8.26 (6.41 to 10.34)   | 0.12 (-0.02 to 0.25)   |
| 45 |             |                        |                        |                        |                     |                     |                        |                        |                        |                        |
| 46 |             |                        |                        |                        |                     |                     |                        |                        |                        |                        |
| 47 | Niger       | 7.12 (5.75 to 8.74)    | 7.75 (6.26 to 9.48)    | 0.37 (0.26 to 0.48)    | 0.58 (0.28 to 0.99) | 0.5 (0.29 to 0.79)  | -0.71 (-0.92 to -0.51) | 21.59 (8.82 to 38.22)  | 17.16 (9.15 to 26.85)  | -1.08 (-1.30 to -0.86) |
| 48 |             |                        |                        |                        |                     |                     |                        |                        |                        |                        |
| 49 | Nigeria     | 8.88 (7.36 to 10.86)   | 11.03 (9.13 to 13.41)  | 0.98 (0.83 to 1.14)    | 0.57 (0.28 to 0.97) | 0.52 (0.28 to 0.83) | -0.11 (-0.21 to -0.02) | 19.98 (11.19 to 32.55) | 17.08 (10.24 to 26.72) | -0.43 (-0.51 to -0.35) |
| 50 |             |                        |                        |                        |                     |                     |                        |                        |                        |                        |
| 51 |             |                        |                        |                        |                     |                     |                        |                        |                        |                        |
| 52 | Niue        | 5.82 (4.77 to 7.03)    | 5.53 (4.56 to 6.74)    | -0.24 (-0.39 to -0.08) | 0.96 (0.67 to 1.38) | 0.63 (0.38 to 0.91) | -1.75 (-1.86 to -1.63) | 29.80 (19.61 to 46.61) | 19.00 (10.29 to 29.66) | -1.92 (-2.07 to -1.78) |
| 53 |             |                        |                        |                        |                     |                     |                        |                        |                        |                        |
| 54 |             | 119.00                 | 122.13                 |                        |                     |                     |                        |                        |                        |                        |
| 55 | North       | (100.79 to 140.81)     | (103.27 to 143.78)     | 0.14 (0.12 to 0.17)    | 0.20 (0.15 to 0.25) | 0.18 (0.13 to 0.23) | -0.21 (-0.36 to -0.07) | 23.91 (17.63 to 31.43) | 23.32 (16.99 to 31.08) | 0.00 (-0.04 to 0.05)   |
| 56 | Macedonia   |                        |                        |                        |                     |                     |                        |                        |                        |                        |
| 57 |             |                        |                        |                        |                     |                     |                        |                        |                        |                        |
| 58 | Northern    | 6.60 (5.47 to 7.98)    | 5.79 (4.80 to 6.96)    | -0.61 (-0.80 to -0.42) | 1.28 (0.85 to 1.82) | 0.38 (0.26 to 0.73) | -4.76 (-5.32 to -4.19) | 34.73 (23.54 to 50.03) | 11.56 (7.82 to 20.63)  | -4.28 (-4.78 to -3.78) |
| 59 | Mariana     |                        |                        |                        |                     |                     |                        |                        |                        |                        |
| 60 |             |                        |                        |                        |                     |                     |                        |                        |                        |                        |

|    |                 |               |               |               |               |               |               |               |               |               |
|----|-----------------|---------------|---------------|---------------|---------------|---------------|---------------|---------------|---------------|---------------|
| 1  |                 |               |               |               |               |               |               |               |               |               |
| 2  |                 |               |               |               |               |               |               |               |               |               |
| 3  | Islands         |               |               |               |               |               |               |               |               |               |
| 4  |                 | 406.73        | 498.95        |               |               |               |               |               |               |               |
| 5  |                 | (342.53 to    | (429.41 to    | 0.38 (0.24 to | 0.43 (0.39 to | 0.38 (0.32 to | -0.86 (-1.19  | 69.15 (49.57  | 80.37 (56.25  | 0.17 (0.01 to |
| 6  | Norway          | 478.15)       | 570.55)       | 0.52)         | 0.58)         | 0.52)         | to -0.53)     | to 92.09)     | to 108.56)    | 0.33)         |
| 7  |                 |               |               |               |               |               |               |               |               |               |
| 8  |                 |               |               |               |               |               |               |               |               |               |
| 9  | Oman            | 32.04 (26.30  | 33.81 (27.79  | 0.24 (0.08 to | 0.23 (0.12 to | 0.23 (0.15 to | 0.58 (0.34 to | 10.5 (7.14 to | 9.96 (7.66 to | 0.17 (0.00 to |
| 10 |                 | to 38.55)     | to 40.80)     | 0.40)         | 0.39)         | 0.34)         | 0.82)         | 15.11)        | 12.72)        | 0.35)         |
| 11 |                 |               |               |               |               |               |               |               |               |               |
| 12 | Pakistan        | 13.75 (11.11  | 16.77 (13.78  | 0.77 (0.72 to | 0.78 (0.39 to | 0.62 (0.41 to | -0.87 (-0.93  | 21.52 (12.69  | 17.80 (12.91  | -0.71 (-0.77  |
| 13 |                 | to 17.15)     | to 21.25)     | 0.81)         | 1.57)         | 0.99)         | to -0.80)     | to 38.34)     | to 25.37)     | to -0.66)     |
| 14 |                 |               |               |               |               |               |               |               |               |               |
| 15 | Palau           | 5.62 (4.60 to | 5.22 (4.30 to | -0.40 (-0.56  | 0.88 (0.53 to | 0.62 (0.29 to | -1.36 (-1.47  | 26.21 (13.51  | 19.34 (8.32   | -1.21 (-1.31  |
| 16 |                 | 6.79)         | 6.32)         | to -0.24)     | 1.46)         | 0.97)         | to -1.24)     | to 47.84)     | to 32.27)     | to -1.10)     |
| 17 |                 |               |               |               |               |               |               |               |               |               |
| 18 | Palestine       | 31.49 (25.86  | 35.42 (29.15  | 0.71 (0.52 to | 0.33 (0.23 to | 0.20 (0.15 to | -2.83 (-3.48  | 11.67 (8.60   | 9.47 (7.18 to | -1.16 (-1.42  |
| 19 |                 | to 38.19)     | to 42.61)     | 0.90)         | 0.50)         | 0.29)         | to -2.18)     | to 16.06)     | 12.75)        | to -0.90)     |
| 20 |                 |               |               |               |               |               |               |               |               |               |
| 21 | Panama          | 30.64 (26.19  | 31.9 (26.95   | 0.09 (0.04 to | 0.40 (0.33 to | 0.59 (0.45 to | 2.20 (1.67 to | 19.61 (16.04  | 24.28 (18.4   | 1.57 (1.10 to |
| 22 |                 | to 35.44)     | to 37.19)     | 0.14)         | 0.57)         | 0.76)         | 2.73)         | to 24.02)     | to 31.52)     | 2.05)         |
| 23 | Papua New       | 4.05 (3.24 to | 3.65 (2.96 to | -0.52 (-0.69  | 0.54 (0.31 to | 0.42 (0.27 to | -1.02 (-1.10  | 19.34 (11.2   | 14.68 (9.5 to | -1.09 (-1.18  |
| 24 | Guinea          | 4.88)         | 4.45)         | to -0.35)     | 0.80)         | 0.63)         | to -0.93)     | to 29.45)     | 21.87)        | to -1.00)     |
| 25 |                 |               |               |               |               |               |               |               |               |               |
| 26 | Paraguay        | 35.78 (30.69  | 30.96 (26.24  | -0.62 (-0.73  | 0.16 (0.13 to | 0.21 (0.15 to | 1.35 (1.08 to | 10.62 (8.39   | 10.30 (7.70   | 0.12 (-0.06   |
| 27 |                 | to 41.49)     | to 36.59)     | to -0.50)     | 0.21)         | 0.28)         | 1.63)         | to 13.36)     | to 13.16)     | to 0.29)      |
| 28 |                 |               |               |               |               |               |               |               |               |               |
| 29 | Peru            | 17.18 (14.20  | 16.74 (13.74  | -0.14 (-0.17  | 0.69 (0.47 to | 0.23 (0.16 to | -4.20 (-4.68  | 34.79 (19.65  | 9.31 (6.89 to | -5.08 (-5.69  |
| 30 |                 | to 20.56)     | to 20.14)     | to -0.10)     | 0.93)         | 0.32)         | to -3.72)     | to 53.77)     | 12.58)        | to -4.47)     |
| 31 |                 |               |               |               |               |               |               |               |               |               |
| 32 | Philippines     | 4.47 (3.59 to | 4.96 (4.02 to | 0.35 (0.25 to | 0.35 (0.16 to | 0.16 (0.13 to | -3.25 (-3.54  | 8.94 (5.36 to | 4.87 (4.06 to | -2.61 (-2.86  |
| 33 |                 | 5.38)         | 6.00)         | 0.46)         | 0.46)         | 0.20)         | to -2.95)     | 11.07)        | 6.26)         | to -2.35)     |
| 34 |                 |               |               |               |               |               |               |               |               |               |
| 35 | Poland          | 418.60        | 177.25        | -3.73 (-4.52  | 0.44 (0.41 to | 0.53 (0.42 to | 0.82 (0.68 to | 72.05 (51.85  | 38.44 (29.32  | -2.70 (-3.28  |
| 36 |                 | (351.62 to    | (157.39 to    | to -2.94)     | 0.51)         | 0.62)         | 0.96)         | to 95.72)     | to 49.04)     | to -2.11)     |
| 37 |                 | 498.71)       | 199.48)       |               |               |               |               |               |               |               |
| 38 | Portugal        | 52.37 (46.30  | 74.24 (66.91  | 0.72 (0.46 to | 0.69 (0.60 to | 1.06 (0.57 to | 2.38 (1.99 to | 20.51 (17.46  | 27.82 (20.23  | 1.24 (1.07 to |
| 39 |                 | to 58.76)     | to 82.44)     | 0.99)         | 0.76)         | 1.24)         | 2.77)         | to 24.14)     | to 33.05)     | 1.41)         |
| 40 |                 |               |               |               |               |               |               |               |               |               |
| 41 | Puerto Rico     | 31.12 (29.32  | 30.88 (28.28  | 0.00 (-0.04   | 0.56 (0.43 to | 0.27 (0.19 to | -3.70 (-4.28  | 21.05 (16.43  | 12.28 (9.43   | -2.69 (-3.09  |
| 42 |                 | to 33.10)     | to 33.59)     | to 0.04)      | 0.64)         | 0.41)         | to -3.10)     | to 24.23)     | to 16.08)     | to -2.29)     |
| 43 |                 |               |               |               |               |               |               |               |               |               |
| 44 | Qatar           | 38.47 (31.44  | 44.46 (36.75  | 0.53 (0.42 to | 0.37 (0.24 to | 0.34 (0.21 to | 0.52 (0.07 to | 14.06 (10.55  | 13.06 (9.28   | 0.13 (-0.12   |
| 45 |                 | to 45.79)     | to 53.66)     | 0.64)         | 0.59)         | 0.51)         | 0.98)         | to 19.68)     | to 17.59)     | to 0.37)      |
| 46 |                 |               |               |               |               |               |               |               |               |               |
| 47 | Republic of     | 37.89 (33.49  | 70.21 (66.03  | 1.25 (0.89 to | 1.76 (0.56 to | 0.30 (0.23 to | -7.96 (-8.67  | 31.72 (18.30  | 15 (11.13 to  | -3.63 (-4.02  |
| 48 | Korea           | to 42.88)     | to 74.79)     | 1.61)         | 2.34)         | 0.39)         | to -7.25)     | to 38.85)     | 19.33)        | to -3.23)     |
| 49 |                 |               |               |               |               |               |               |               |               |               |
| 50 | Republic of     | 67.21 (55.76  | 66.12 (59.51  | 0.47 (0.09 to | 0.38 (0.32 to | 0.33 (0.27 to | -0.60 (-0.96  | 22.87 (18.45  | 20.72 (16.98  | -0.20 (-0.52  |
| 51 | Moldova         | to 80.49)     | to 73.09)     | 0.85)         | 0.47)         | 0.39)         | to -0.25)     | to 27.69)     | to 25.12)     | to 0.13)      |
| 52 |                 |               |               |               |               |               |               |               |               |               |
| 53 | Romania         | 70.01 (58.65  | 70.93 (63.66  | 0.37 (0.16 to | 0.27 (0.23 to | 0.23 (0.18 to | -0.65 (-1.01  | 21.99 (17.23  | 17.97 (13.92  | -0.63 (-0.89  |
| 54 |                 | to 82.51)     | to 79.55)     | 0.59)         | 0.31)         | 0.28)         | to -0.29)     | to 27.18)     | to 22.6)      | to -0.37)     |
| 55 |                 |               |               |               |               |               |               |               |               |               |
| 56 | Russian         | 95.59 (81.25  | 85.89 (72.98  | -0.12 (-0.25  | 0.57 (0.42 to | 0.56 (0.46 to | -0.40 (-0.74  | 30.76 (24.06  | 28.04 (22.97  | -0.52 (-0.70  |
| 57 | Federation      | to 111.84)    | to 100.35)    | to 0.00)      | 0.66)         | 0.66)         | to -0.06)     | to 37.42)     | to 34.48)     | to -0.35)     |
| 58 |                 |               |               |               |               |               |               |               |               |               |
| 59 | Rwanda          | 6.69 (5.55 to | 7.89 (6.47 to | 0.57 (0.40 to | 0.92 (0.61 to | 0.65 (0.42 to | -1.79 (-2.06  | 29.08 (17.93  | 19.33 (12.66  | -1.92 (-2.15  |
| 60 |                 | 8.31)         | 9.74)         | 0.74)         | 1.40)         | 0.92)         | to -1.51)     | to 46.16)     | to 28.48)     | to -1.69)     |
| 61 |                 |               |               |               |               |               |               |               |               |               |
| 62 | Saint Kitts and | 29.59 (24.68  | 28.95 (23.75  | 0.06 (-0.02   | 2.25 (1.70 to | 1.44 (1.06 to | -2.01 (-2.26  | 67.93 (52.91  | 42.16 (29.05  | -2.07 (-2.32  |
| 63 | Nevis           | to 35.93)     | to 35.61)     | to 0.14)      | 2.63)         | 2.05)         | to -1.76)     | to 79.57)     | to 61.00)     | to -1.82)     |
| 64 |                 |               |               |               |               |               |               |               |               |               |
| 65 | Saint Lucia     | 25.70 (21.15  | 27.48 (22.74  | 0.32 (0.22 to | 0.99 (0.78 to | 0.65 (0.51 to | -2.24 (-2.69  | 32.61 (26.63  | 22.26 (17.86  | -1.84 (-2.19  |
| 66 |                 |               |               |               |               |               |               |               |               |               |

|    |               |               |               |               |               |               |               |               |               |               |
|----|---------------|---------------|---------------|---------------|---------------|---------------|---------------|---------------|---------------|---------------|
| 1  |               |               |               |               |               |               |               |               |               |               |
| 2  |               |               |               |               |               |               |               |               |               |               |
| 3  |               | to 31.22)     | to 33.54)     | 0.42)         | 1.15)         | 0.84)         | to -1.78)     | to 37.29)     | to 28.14)     | to -1.49)     |
| 4  |               |               |               |               |               |               |               |               |               |               |
| 5  | Saint Vincent | 24.91 (20.72  | 24.40 (20.24  | 0.24 (0.13 to | 1.31 (1.08 to | 1.22 (0.98 to | -0.56 (-0.70  | 44.25 (37.35  | 38.61 (31.46  | -0.80 (-0.94  |
| 6  | and the       | to 30.36)     | to 29.76)     | 0.34)         | 1.57)         | 1.53)         | to -0.41)     | to 51.61)     | to 48.07)     | to -0.67)     |
| 7  | Grenadines    |               |               |               |               |               |               |               |               |               |
| 8  |               |               |               |               |               |               |               |               |               |               |
| 9  | Samoa         | 5.60 (4.60 to | 4.77 (3.92 to | -0.77 (-1.05  | 0.98 (0.66 to | 0.63 (0.45 to | -1.64 (-1.80  | 27.95 (18.61  | 17.97 (11.92  | -1.62 (-1.75  |
| 10 |               | 6.71)         | 5.78)         | to -0.49)     | 1.49)         | 0.85)         | to -1.47)     | to 40.58)     | to 26.18)     | to -1.49)     |
| 11 |               | 107.02        | 112.86        |               |               |               |               |               |               |               |
| 12 | San Marino    | (89.88 to     | (94.72 to     | 0.23 (0.21 to | 0.37 (0.27 to | 0.36 (0.22 to | 0.22 (0.06 to | 21.57 (15.79  | 21.79 (15.52  | 0.15 (0.11 to |
| 13 |               | 126.67)       | 132.67)       | 0.24)         | 0.48)         | 0.53)         | 0.38)         | to 28.34)     | to 28.71)     | 0.19)         |
| 14 |               |               |               |               |               |               |               |               |               |               |
| 15 | Sao Tome and  | 10.50 (8.66   | 11.85 (9.61   | 0.59 (0.46 to | 0.46 (0.26 to | 0.31 (0.21 to | -1.58 (-1.93  | 15.7 (9.25 to | 10.34 (7.41   | -1.71 (-2.03  |
| 16 | Principe      | to 12.87)     | to 14.64)     | 0.71)         | 0.73)         | 0.50)         | to -1.24)     | 23.73)        | to 15.57)     | to -1.38)     |
| 17 |               |               |               |               |               |               |               |               |               |               |
| 18 | Saudi Arabia  | 33.86 (28.47  | 34.43 (28.66  | 0.22 (0.09 to | 0.19 (0.11 to | 0.15 (0.11 to | -0.60 (-0.71  | 9.73 (6.96 to | 8.9 (6.65 to  | -0.18 (-0.25  |
| 19 |               | to 40.38)     | to 41.36)     | 0.35)         | 0.31)         | 0.21)         | to -0.48)     | 13.65)        | 11.75)        | to -0.10)     |
| 20 |               |               |               |               |               |               |               |               |               |               |
| 21 | Senegal       | 8.06 (6.57 to | 8.84 (7.25 to | 0.39 (0.27 to | 0.55 (0.29 to | 0.43 (0.27 to | -1.00 (-1.21  | 18.61 (9.28   | 14.15 (8.71   | -1.12 (-1.32  |
| 22 |               | 9.88)         | 11.10)        | 0.51)         | 0.93)         | 0.65)         | to -0.78)     | to 29.66)     | to 21.53)     | to -0.91)     |
| 23 |               | 118.24        | 151.50        |               |               |               |               |               |               |               |
| 24 | Serbia        | (99.70 to     | (130.14 to    | 0.43 (0.26 to | 0.49 (0.37 to | 0.76 (0.50 to | 2.49 (2.05 to | 31.72 (24.28  | 39.47 (29.72  | 0.83 (0.67 to |
| 25 |               | 138.39)       | 173.84)       | 0.61)         | 0.78)         | 0.97)         | 2.94)         | to 43.38)     | to 49.82)     | 0.98)         |
| 26 |               |               |               |               |               |               |               |               |               |               |
| 27 | Seychelles    | 4.66 (3.75 to | 5.45 (4.43 to | 0.52 (0.44 to | 0.30 (0.19 to | 0.22 (0.16 to | -1.44 (-1.65  | 8.38 (5.69 to | 6.28 (4.77 to | -1.35 (-1.51  |
| 28 |               | 5.71)         | 6.55)         | 0.60)         | 0.38)         | 0.30)         | to -1.23)     | 10.68)        | 7.85)         | to -1.19)     |
| 29 |               |               |               |               |               |               |               |               |               |               |
| 30 | Sierra Leone  | 7.33 (6.06 to | 8.45 (6.95 to | 0.64 (0.51 to | 0.42 (0.19 to | 0.43 (0.24 to | 0.20 (-0.07   | 15.88 (6.30   | 15.30 (8.12   | 0.00 (-0.27   |
| 31 |               | 9.02)         | 10.53)        | 0.77)         | 0.72)         | 0.61)         | to 0.48)      | to 28.04)     | to 23.35)     | to 0.26)      |
| 32 |               |               |               |               |               |               |               |               |               |               |
| 33 | Singapore     | 47.14 (38.3   | 41.88 (34.28  | -0.58 (-0.74  | 0.18 (0.14 to | 0.07 (0.06 to | -3.18 (-3.41  | 12.19 (9.33   | 8.16 (5.69 to | -1.52 (-1.73  |
| 34 |               | to 56.56)     | to 51.91)     | to -0.43)     | 0.20)         | 0.11)         | to -2.95)     | to 15.58)     | 11.25)        | to -1.31)     |
| 35 |               | 165.72        | 154.57        |               |               |               |               |               |               |               |
| 36 | Slovakia      | (148.05 to    | (140.40 to    | -0.05 (-0.12  | 0.54 (0.45 to | 0.68 (0.48 to | 1.56 (1.21 to | 40.62 (31.28  | 40.31 (30.39  | 0.34 (0.19 to |
| 37 |               | 183.09)       | 170.08)       | to 0.02)      | 0.84)         | 0.90)         | 1.91)         | to 53.36)     | to 50.67)     | 0.49)         |
| 38 |               | 167.07        | 179.18        |               |               |               |               |               |               |               |
| 39 | Slovenia      | (146.63 to    | (160.70 to    | 0.15 (0.08 to | 0.44 (0.33 to | 0.39 (0.28 to | -1.39 (-2.13  | 34.68 (25.60  | 34.27 (24.57  | -0.42 (-0.67  |
| 40 |               | 189.8)        | 199.69)       | 0.21)         | 0.56)         | 0.52)         | to -0.65)     | to 44.77)     | to 44.81)     | to -0.17)     |
| 41 |               |               |               |               |               |               |               |               |               |               |
| 42 | Solomon       | 3.49 (2.80 to | 3.35 (2.73 to | -0.31 (-0.46  | 0.75 (0.42 to | 0.53 (0.33 to | -1.42 (-1.56  | 24.39 (12.55  | 17.28 (10.22  | -1.38 (-1.51  |
| 43 | Islands       | 4.25)         | 4.12)         | to -0.15)     | 1.16)         | 0.79)         | to -1.29)     | to 43.26)     | to 29.48)     | to -1.25)     |
| 44 |               |               |               |               |               |               |               |               |               |               |
| 45 | Somalia       | 5.39 (4.41 to | 5.28 (4.33 to | -0.09 (-0.12  | 0.55 (0.29 to | 0.48 (0.30 to | -0.45 (-0.53  | 17.8 (7.75 to | 14.47 (8.44   | -0.63 (-0.69  |
| 46 |               | 6.68)         | 6.56)         | to -0.06)     | 0.91)         | 0.79)         | to -0.37)     | 34.12)        | to 24.4)      | to -0.56)     |
| 47 |               |               |               |               |               |               |               |               |               |               |
| 48 | South Africa  | 11.04 (9.21   | 12.40 (10.36  | 0.52 (0.44 to | 0.39 (0.30 to | 0.39 (0.30 to | 0.13 (-0.38   | 15.07 (10.33  | 12.17 (9.76   | -0.56 (-0.99  |
| 49 |               | to 13.55)     | to 15.05)     | 0.60)         | 0.50)         | 0.47)         | to 0.64)      | to 20.06)     | to 14.04)     | to -0.14)     |
| 50 |               |               |               |               |               |               |               |               |               |               |
| 51 | South Sudan   | 6.93 (5.69 to | 7.78 (6.41 to | 0.35 (0.31 to | 0.68 (0.39 to | 0.65 (0.36 to | -0.05 (-0.09  | 22.59 (10.42  | 19.12 (11.06  | -0.45 (-0.58  |
| 52 |               | 8.55)         | 9.49)         | 0.40)         | 1.43)         | 1.40)         | to 0.00)      | to 43.44)     | to 39.88)     | to -0.32)     |
| 53 |               |               | 134.10        |               |               |               |               |               |               |               |
| 54 | Spain         | 90.41 (86.16  | (127.51 to    | 0.77 (0.60 to | 0.54 (0.46 to | 0.35 (0.29 to | -2.16 (-2.54  | 24.91 (20.33  | 27.31 (20.61  | -0.26 (-0.47  |
| 55 |               | to 94.9)      | 141.19)       | 0.95)         | 0.60)         | 0.50)         | to -1.78)     | to 30.25)     | to 34.99)     | to -0.05)     |
| 56 |               |               |               |               |               |               |               |               |               |               |
| 57 | Sri Lanka     | 5.98 (4.90 to | 9.51 (8.29 to | 1.67 (1.38 to | 0.18 (0.14 to | 0.10 (0.07 to | -2.15 (-2.31  | 5.73 (4.38 to | 3.77 (2.86 to | -1.45 (-1.57  |
| 58 |               | 7.28)         | 10.90)        | 1.96)         | 0.23)         | 0.13)         | to -1.99)     | 7.09)         | 4.79)         | to -1.33)     |
| 59 | Sudan         | 25.18 (20.47  | 30.96 (25.17  | 0.90 (0.76 to | 0.21 (0.10 to | 0.25 (0.14 to | 0.95 (0.78 to | 9.58 (5.87 to | 10.84 (7.56   | 0.71 (0.58 to |
| 60 |               |               |               |               |               |               |               |               |               |               |

|    |              |               |               |               |               |               |               |               |               |               |
|----|--------------|---------------|---------------|---------------|---------------|---------------|---------------|---------------|---------------|---------------|
| 1  |              |               |               |               |               |               |               |               |               |               |
| 2  |              |               |               |               |               |               |               |               |               |               |
| 3  |              | to 31.02)     | to 37.98)     | 1.05)         | 0.39)         | 0.43)         | 1.11)         | 15.53)        | to 15.32)     | 0.84)         |
| 4  |              | 25.78 (21.39  | 25.28 (20.76  | 0.11 (0.01 to | 1.00 (0.77 to | 0.66 (0.50 to | -1.99 (-2.24  | 35.66 (26.78  | 23.00 (18.20  | -1.99 (-2.24  |
| 5  | Suriname     | to 31.18)     | to 30.88)     | 0.22)         | 1.18)         | 0.86)         | to -1.73)     | to 43.03)     | to 29.10)     | to -1.75)     |
| 6  |              | 294.18        | 315.22        |               |               |               |               |               |               |               |
| 7  |              | (253.51 to    | (271.18 to    | 0.31 (0.28 to | 0.68 (0.56 to | 0.38 (0.31 to | -3.16 (-4.26  | 56.12 (41.20  | 53.00 (37.35  | -0.35 (-0.54  |
| 8  | Sweden       | 336.93)       | 360.86)       | 0.34)         | 0.75)         | 0.56)         | to -2.06)     | to 73.41)     | to 71.73)     | to -0.16)     |
| 9  |              | 129.02        | 134.73        |               |               |               |               |               |               |               |
| 10 |              | (116.30 to    | (121.98 to    | 0.09 (0.06 to | 0.68 (0.54 to | 0.58 (0.47 to | -1.03 (-1.80  | 32.21 (25.49  | 29.51 (22.30  | -0.56 (-0.82  |
| 11 | Switzerland  | 142.70)       | 148.05)       | 0.12)         | 0.77)         | 0.75)         | to -0.26)     | to 39.69)     | to 37.67)     | to -0.31)     |
| 12 |              | 28.71 (23.39  | 33.67 (27.34  | 0.96 (0.65 to | 0.46 (0.23 to | 0.36 (0.19 to | -1.00 (-1.20  | 14.71 (9.86   | 12.75 (9.00   | -0.46 (-0.53  |
| 13 | Syrian Arab  | to 35.03)     | to 40.47)     | 1.26)         | 0.76)         | 0.52)         | to -0.80)     | to 20.18)     | to 16.93)     | to -0.39)     |
| 14 | Republic     |               |               |               |               |               |               |               |               |               |
| 15 | Taiwan       | 11.23 (9.74   | 27.80 (24.80  | 4.29 (3.71 to | 0.91 (0.57 to | 0.50 (0.38 to | -2.08 (-3.37  | 17.35 (12.32  | 12.40 (10.06  | -0.85 (-1.78  |
| 16 | (Province of | to 12.86)     | to 31.28)     | 4.86)         | 1.04)         | 0.65)         | to -0.78)     | to 19.43)     | to 15.44)     | to 0.10)      |
| 17 | China)       |               |               |               |               |               |               |               |               |               |
| 18 |              | 68.84 (56.59  | 71.19 (59.54  | 0.12 (0.07 to | 0.41 (0.28 to | 0.3 (0.22 to  | -0.79 (-0.88  | 30.29 (19.52  | 20.60 (15.55  | -0.89 (-1.10  |
| 19 | Tajikistan   | to 83.10)     | to 85.49)     | 0.18)         | 0.58)         | 0.41)         | to -0.70)     | to 43.28)     | to 26.90)     | to -0.69)     |
| 20 |              | 3.31 (2.57 to | 4.28 (3.44 to | 0.96 (0.83 to | 0.2 (0.14 to  | 0.12 (0.08 to | -2.46 (-2.78  | 6.06 (4.39 to | 3.64 (2.76 to | -2.40 (-2.71  |
| 21 | Thailand     | 4.15)         | 5.22)         | 1.08)         | 0.26)         | 0.15)         | to -2.14)     | 7.89)         | 4.68)         | to -2.09)     |
| 22 |              | 3.20 (2.51 to | 3.90 (3.14 to | 0.84 (0.75 to | 0.42 (0.17 to | 0.36 (0.20 to | -0.57 (-0.70  | 11.64 (5.58   | 9.14 (5.17 to | -0.95 (-1.13  |
| 23 | Timor-Leste  | 3.91)         | 4.72)         | 0.94)         | 0.83)         | 0.61)         | to -0.44)     | to 22.42)     | 14.89)        | to -0.77)     |
| 24 |              | 9.42 (7.74 to | 9.00 (7.38 to | 0.03 (-0.09   | 0.49 (0.28 to | 0.48 (0.32 to | -0.05 (-0.31  | 17.29 (9.05   | 16.30 (10.74  | -0.23 (-0.48  |
| 25 | Togo         | 11.41)        | 11.07)        | to 0.15)      | 0.76)         | 0.68)         | to 0.21)      | to 26.59)     | to 22.75)     | to 0.01)      |
| 26 |              | 4.65 (3.78 to | 5.36 (4.37 to | 0.72 (0.46 to | 0.89 (0.57 to | 0.58 (0.42 to | -1.72 (-1.88  | 25.84 (15.77  | 16.11 (11.19  | -1.68 (-1.80  |
| 27 | Tokelau      | 5.66)         | 6.54)         | 0.97)         | 1.34)         | 0.78)         | to -1.57)     | to 38.77)     | to 22.98)     | to -1.56)     |
| 28 |              | 5.55 (4.56 to | 4.96 (4.08 to | -0.51 (-0.69  | 1.14 (0.67 to | 0.76 (0.56 to | -1.73 (-1.92  | 31.30 (19.82  | 21.58 (15.55  | -1.63 (-1.83  |
| 29 | Tonga        | 6.66)         | 5.98)         | to -0.32)     | 1.64)         | 1.02)         | to -1.54)     | to 44.12)     | to 30.10)     | to -1.44)     |
| 30 |              | 27.68 (22.88  | 27.49 (22.91  | 0.31 (0.17 to | 0.34 (0.24 to | 0.29 (0.21 to | -0.98 (-1.25  | 14.27 (10.86  | 12.54 (9.51   | -0.66 (-0.84  |
| 31 | Trinidad and | to 33.63)     | to 33.71)     | 0.45)         | 0.39)         | 0.39)         | to -0.72)     | to 16.75)     | to 16.14)     | to -0.48)     |
| 32 | Tobago       |               |               |               |               |               |               |               |               |               |
| 33 |              | 35.29 (29.00  | 40.47 (33.21  | 0.59 (0.45 to | 0.15 (0.1 to  | 0.14 (0.09 to | -0.05 (-0.15  | 9.05 (6.50 to | 9.36 (6.89 to | 0.27 (0.17 to |
| 34 | Tunisia      | to 42.68)     | to 49.35)     | 0.73)         | 0.22)         | 0.20)         | to 0.06)      | 12.22)        | 12.40)        | 0.37)         |
| 35 |              | 50.66 (44.42  | 98.87 (84.96  | 2.04 (1.87 to | 0.67 (0.43 to | 0.40 (0.30 to | -1.87 (-2.02  | 27.88 (19.30  | 25.05 (19.42  | -0.61 (-0.70  |
| 36 | Turkey       | to 56.99)     | to 113.45)    | 2.20)         | 1.06)         | 0.56)         | to -1.72)     | to 38.53)     | to 32.24)     | to -0.51)     |
| 37 |              | 69.03 (57.31  | 77.89 (64.42  | 0.43 (0.32 to | 0.37 (0.28 to | 0.33 (0.22 to | -0.50 (-0.78  | 24.59 (17.78  | 22.90 (16.63  | -0.20 (-0.38  |
| 38 | Turkmenistan | to 82.24)     | to 92.76)     | 0.54)         | 0.49)         | 0.46)         | to -0.21)     | to 31.67)     | to 29.27)     | to -0.02)     |
| 39 |              | 4.48 (3.63 to | 4.08 (3.38 to | -0.47 (-0.63  | 1.08 (0.65 to | 0.71 (0.47 to | -1.60 (-1.73  | 33.30 (17.86  | 21.17 (13.37  | -1.65 (-1.76  |
| 40 | Tuvalu       | 5.44)         | 4.88)         | to -0.30)     | 1.59)         | 1.05)         | to -1.47)     | to 54.06)     | to 33.22)     | to -1.55)     |
| 41 |              | 5.79 (4.75 to | 7.14 (5.88 to | 1.01 (0.88 to | 0.59 (0.37 to | 0.61 (0.40 to | -0.03 (-0.17  | 17.22 (11.39  | 17.40 (12.18  | -0.02 (-0.16  |
| 42 | Uganda       | 7.14)         | 8.92)         | 1.15)         | 0.91)         | 0.92)         | to 0.10)      | to 25.60)     | to 25.46)     | to 0.13)      |
| 43 |              | 68.71 (57.64  | 68 (57.27 to  | 0.19 (0.03 to | 0.34 (0.26 to | 0.39 (0.31 to | 0.17 (-0.10   | 21.06 (16.76  | 23.62 (18.99  | 0.34 (0.12 to |
| 44 | Ukraine      | to 82.57)     | 80.79)        | 0.35)         | 0.45)         | 0.48)         | to 0.44)      | to 26.65)     | to 28.82)     | 0.56)         |
| 45 |              | 36.50 (30.28  | 42.72 (35.58  | 0.73 (0.60 to | 0.21 (0.09 to | 0.24 (0.15 to | 0.72 (0.25 to | 10.79 (6.88   | 12.40 (8.88   | 0.73 (0.52 to |
| 46 | United Arab  | to 44.12)     | to 51.97)     | 0.87)         | 0.43)         | 0.43)         | 1.20)         | to 16.90)     | to 17.45)     | 0.94)         |
| 47 | Emirates     |               |               |               |               |               |               |               |               |               |
| 48 | United       | 223.81        | 240.37        | 0.17 (0.12 to | 0.97 (0.85 to | 1.30 (1.12 to | 1.22 (0.84 to | 52.80 (41.67  | 59.34 (47.21  | 0.41 (0.25 to |
| 49 | Kingdom      | (197.49 to    | (214.96 to    | 0.21)         | 1.18)         | 1.44)         | 1.59)         | to 65.37)     | to 72.73)     | 0.57)         |
| 50 |              |               |               |               |               |               |               |               |               |               |



|    |                |               |               |               |               |               |               |               |               |               |
|----|----------------|---------------|---------------|---------------|---------------|---------------|---------------|---------------|---------------|---------------|
| 1  |                |               |               |               |               |               |               |               |               |               |
| 2  |                |               |               |               |               |               |               |               |               |               |
| 3  |                | 251.35)       | 267.14)       |               |               |               |               |               |               |               |
| 4  |                |               |               |               |               |               |               |               |               |               |
| 5  | United         |               |               |               |               |               |               |               |               |               |
| 6  | Republic of    | 7.20 (5.89 to | 7.76 (6.36 to | 0.22 (0.10 to | 0.58 (0.40 to | 0.60 (0.41 to | 0.38 (0.19 to | 19.56 (13.24  | 18.91 (12.48  | 0.25 (0.07 to |
| 7  | Tanzania       | 8.90)         | 9.50)         | 0.35)         | 0.81)         | 0.89)         | 0.57)         | to 32.21)     | to 26.55)     | 0.43)         |
| 8  |                |               |               |               |               |               |               |               |               |               |
| 9  | United States  | 343.12        | 193.07        |               |               |               |               |               |               |               |
| 10 | of America     | (295.81 to    | (179.65 to    | -1.59 (-2.08  | 0.67 (0.60 to | 1.02 (0.80 to | 1.80 (1.52 to | 64.72 (47.50  | 49.82 (40.25  | -0.48 (-0.78  |
| 11 |                | 394.51)       | 206.87)       | to -1.09)     | 0.82)         | 1.11)         | 2.07)         | to 84.88)     | to 60.19)     | to -0.18)     |
| 12 | United States  | 31.96 (26.73  | 33.22 (27.69  | 0.23 (0.16 to | 0.81 (0.56 to | 0.45 (0.34 to | -2.32 (-2.66  | 26.35 (19.55  | 15.91 (12.54  | -2.03 (-2.27  |
| 13 | Virgin Islands | to 38.19)     | to 39.97)     | 0.31)         | 1.02)         | 0.59)         | to -1.99)     | to 32.66)     | to 20.17)     | to -1.78)     |
| 14 |                |               |               |               |               |               |               |               |               |               |
| 15 | Uruguay        | 17.66 (14.59  | 17.41 (14.35  | -0.17 (-0.21  | 0.27 (0.23 to | 0.41 (0.35 to | 1.10 (0.62 to | 9.71 (8.22 to | 12.78 (11.11  | 0.63 (0.27 to |
| 16 |                | to 21.30)     | to 21.13)     | to -0.13)     | 0.37)         | 0.47)         | 1.58)         | 12.16)        | to 14.58)     | 0.98)         |
| 17 |                |               |               |               |               |               |               |               |               |               |
| 18 | Uzbekistan     | 74.25 (62.30  | 75.79 (63.42  | -0.02 (-0.05  | 0.28 (0.20 to | 0.29 (0.23 to | -0.33 (-0.58  | 23.48 (17.64  | 21.90 (17.37  | -0.47 (-0.58  |
| 19 |                | to 88.98)     | to 90.50)     | to 0.01)      | 0.39)         | 0.39)         | to -0.09)     | to 29.48)     | to 27.16)     | to -0.36)     |
| 20 |                |               |               |               |               |               |               |               |               |               |
| 21 | Vanuatu        | 4.27 (3.44 to | 3.94 (3.23 to | -0.42 (-0.59  | 1.22 (0.69 to | 0.84 (0.52 to | -1.74 (-1.94  | 34.45 (18.68  | 25.36 (15.29  | -1.58 (-1.80  |
| 22 |                | 5.21)         | 4.77)         | to -0.24)     | 2.03)         | 1.24)         | to -1.54)     | to 54.26)     | to 38.79)     | to -1.36)     |
| 23 | Venezuela      | 29.50 (25.29  | 29.03 (24.54  | -0.01 (-0.05  | 0.25 (0.17 to | 0.15 (0.11 to | -2.32 (-2.82  | 12.00 (9.33   | 8.87 (6.84 to | -1.36 (-1.66  |
| 24 | (Bolivarian    | to 33.94)     | to 34.19)     | to 0.03)      | 0.29)         | 0.21)         | to -1.82)     | to 14.20)     | 11.26)        | to -1.05)     |
| 25 | Republic of)   |               |               |               |               |               |               |               |               |               |
| 26 |                |               |               |               |               |               |               |               |               |               |
| 27 | Viet Nam       | 9.12 (7.04 to | 18.35 (14.68  | 2.72 (2.05 to | 0.58 (0.30 to | 0.22 (0.15 to | -3.98 (-4.35  | 13.87 (8.53   | 7.60 (5.65 to | -2.48 (-2.72  |
| 28 |                | 11.43)        | to 22.55)     | 3.39)         | 0.88)         | 0.32)         | to -3.61)     | to 18.99)     | 9.80)         | to -2.23)     |
| 29 |                |               |               |               |               |               |               |               |               |               |
| 30 | Yemen          | 23.40 (18.89  | 28.03 (22.65  | 0.95 (0.76 to | 0.28 (0.15 to | 0.33 (0.22 to | 0.85 (0.73 to | 10.64 (7.11   | 12.40 (9.18   | 0.79 (0.66 to |
| 31 |                | to 29.12)     | to 34.94)     | 1.14)         | 0.52)         | 0.52)         | 0.97)         | to 15.89)     | to 16.77)     | 0.93)         |
| 32 |                |               |               |               |               |               |               |               |               |               |
| 33 | Zambia         | 6.36 (5.26 to | 8.42 (6.92 to | 0.86 (0.63 to | 0.86 (0.60 to | 0.70 (0.51 to | -0.86 (-1.04  | 27.59 (16.02  | 20.49 (14.47  | -1.05 (-1.14  |
| 34 |                | 7.78)         | 10.46)        | 1.10)         | 1.32)         | 0.94)         | to -0.69)     | to 45.42)     | to 27.66)     | to -0.96)     |
| 35 | Zimbabwe       | 8.69 (7.15 to | 8.91 (7.29 to | 0.21 (0.11 to | 0.47 (0.36 to | 0.58 (0.35 to | 0.96 (0.85 to | 14.20 (10.79  | 17.38 (10.28  | 1.22 (0.99 to |
| 36 |                | 10.74)        | 11.06)        | 0.30)         | 0.64)         | 0.86)         | 1.06)         | to 19.20)     | to 25.35)     | 1.44)         |

Abbreviations: CI=confidence interval. DALY=disability adjusted life year.  
EAPC=estimated annual percentage change. UI=uncertainty interval.



## STROBE Statement—checklist of items that should be included in reports of observational studies

|                              | Item No | Recommendation                                                                                                                                                                                                                                                                                                                                                                                                                                                         | Page No |
|------------------------------|---------|------------------------------------------------------------------------------------------------------------------------------------------------------------------------------------------------------------------------------------------------------------------------------------------------------------------------------------------------------------------------------------------------------------------------------------------------------------------------|---------|
| <b>Title and abstract</b>    | 1       | (a) Indicate the study's design with a commonly used term in the title or the abstract                                                                                                                                                                                                                                                                                                                                                                                 | 1       |
|                              |         | (b) Provide in the abstract an informative and balanced summary of what was done and what was found                                                                                                                                                                                                                                                                                                                                                                    | 2       |
| <b>Introduction</b>          |         |                                                                                                                                                                                                                                                                                                                                                                                                                                                                        |         |
| Background/rationale         | 2       | Explain the scientific background and rationale for the investigation being reported                                                                                                                                                                                                                                                                                                                                                                                   | 4       |
| Objectives                   | 3       | State specific objectives, including any prespecified hypotheses                                                                                                                                                                                                                                                                                                                                                                                                       | 4       |
| <b>Methods</b>               |         |                                                                                                                                                                                                                                                                                                                                                                                                                                                                        |         |
| Study design                 | 4       | Present key elements of study design early in the paper                                                                                                                                                                                                                                                                                                                                                                                                                | 5       |
| Setting                      | 5       | Describe the setting, locations, and relevant dates, including periods of recruitment, exposure, follow-up, and data collection                                                                                                                                                                                                                                                                                                                                        | 5       |
| Participants                 | 6       | (a) <i>Cohort study</i> —Give the eligibility criteria, and the sources and methods of selection of participants. Describe methods of follow-up<br><i>Case-control study</i> —Give the eligibility criteria, and the sources and methods of case ascertainment and control selection. Give the rationale for the choice of cases and controls<br><i>Cross-sectional study</i> —Give the eligibility criteria, and the sources and methods of selection of participants | 5       |
|                              |         | (b) <i>Cohort study</i> —For matched studies, give matching criteria and number of exposed and unexposed<br><i>Case-control study</i> —For matched studies, give matching criteria and the number of controls per case                                                                                                                                                                                                                                                 |         |
| Variables                    | 7       | Clearly define all outcomes, exposures, predictors, potential confounders, and effect modifiers. Give diagnostic criteria, if applicable                                                                                                                                                                                                                                                                                                                               | 5-6     |
| Data sources/<br>measurement | 8*      | For each variable of interest, give sources of data and details of methods of assessment (measurement). Describe comparability of assessment methods if there is more than one group                                                                                                                                                                                                                                                                                   | 5-6     |
| Bias                         | 9       | Describe any efforts to address potential sources of bias                                                                                                                                                                                                                                                                                                                                                                                                              | 6       |
| Study size                   | 10      | Explain how the study size was arrived at                                                                                                                                                                                                                                                                                                                                                                                                                              | 6       |
| Quantitative variables       | 11      | Explain how quantitative variables were handled in the analyses. If applicable, describe which groupings were chosen and why                                                                                                                                                                                                                                                                                                                                           | 5-6     |
| Statistical methods          | 12      | (a) Describe all statistical methods, including those used to control for confounding                                                                                                                                                                                                                                                                                                                                                                                  | 6       |
|                              |         | (b) Describe any methods used to examine subgroups and interactions                                                                                                                                                                                                                                                                                                                                                                                                    | 6       |
|                              |         | (c) Explain how missing data were addressed                                                                                                                                                                                                                                                                                                                                                                                                                            | 6       |
|                              |         | (d) <i>Cohort study</i> —If applicable, explain how loss to follow-up was addressed<br><i>Case-control study</i> —If applicable, explain how matching of cases and controls was addressed<br><i>Cross-sectional study</i> —If applicable, describe analytical methods taking account of sampling strategy                                                                                                                                                              |         |
|                              |         | (e) Describe any sensitivity analyses                                                                                                                                                                                                                                                                                                                                                                                                                                  | 6       |

Continued on next page

1  
2  
3  
4  
5  
6  
7  
8  
9  
10  
11  
12  
13  
14  
15  
16  
17  
18  
19  
20  
21  
22  
23  
24  
25  
26  
27  
28  
29  
30  
31  
32  
33  
34  
35  
36  
37  
38  
39  
40  
41  
42  
43  
44  
45  
46  
47  
48  
49  
50  
51  
52  
53  
54  
55  
56  
57  
58  
59  
60

| <b>Results</b>           |     |                                                                                                                                                                                                              |       |
|--------------------------|-----|--------------------------------------------------------------------------------------------------------------------------------------------------------------------------------------------------------------|-------|
| Participants             | 13* | (a) Report numbers of individuals at each stage of study—eg numbers potentially eligible, examined for eligibility, confirmed eligible, included in the study, completing follow-up, and analysed            | 6-10  |
|                          |     | (b) Give reasons for non-participation at each stage                                                                                                                                                         | 6-10  |
|                          |     | (c) Consider use of a flow diagram                                                                                                                                                                           | 6-10  |
| Descriptive data         | 14* | (a) Give characteristics of study participants (eg demographic, clinical, social) and information on exposures and potential confounders                                                                     | 6-10  |
|                          |     | (b) Indicate number of participants with missing data for each variable of interest                                                                                                                          | 6-10  |
|                          |     | (c) <i>Cohort study</i> —Summarise follow-up time (eg, average and total amount)                                                                                                                             | 6-10  |
| Outcome data             | 15* | <i>Cohort study</i> —Report numbers of outcome events or summary measures over time                                                                                                                          | 6-10  |
|                          |     | <i>Case-control study</i> —Report numbers in each exposure category, or summary measures of exposure                                                                                                         | 6-10  |
|                          |     | <i>Cross-sectional study</i> —Report numbers of outcome events or summary measures                                                                                                                           | 6-10  |
| Main results             | 16  | (a) Give unadjusted estimates and, if applicable, confounder-adjusted estimates and their precision (eg, 95% confidence interval). Make clear which confounders were adjusted for and why they were included | 6-10  |
|                          |     | (b) Report category boundaries when continuous variables were categorized                                                                                                                                    | 6-10  |
|                          |     | (c) If relevant, consider translating estimates of relative risk into absolute risk for a meaningful time period                                                                                             | 6-10  |
| Other analyses           | 17  | Report other analyses done—eg analyses of subgroups and interactions, and sensitivity analyses                                                                                                               | 6-10  |
| <b>Discussion</b>        |     |                                                                                                                                                                                                              |       |
| Key results              | 18  | Summarise key results with reference to study objectives                                                                                                                                                     | 10-11 |
| Limitations              | 19  | Discuss limitations of the study, taking into account sources of potential bias or imprecision. Discuss both direction and magnitude of any potential bias                                                   | 12    |
| Interpretation           | 20  | Give a cautious overall interpretation of results considering objectives, limitations, multiplicity of analyses, results from similar studies, and other relevant evidence                                   | 10-13 |
| Generalisability         | 21  | Discuss the generalisability (external validity) of the study results                                                                                                                                        | 13    |
| <b>Other information</b> |     |                                                                                                                                                                                                              |       |
| Funding                  | 22  | Give the source of funding and the role of the funders for the present study and, if applicable, for the original study on which the present article is based                                                | 14    |

\*Give information separately for cases and controls in case-control studies and, if applicable, for exposed and unexposed groups in cohort and cross-sectional studies.

**Note:** An Explanation and Elaboration article discusses each checklist item and gives methodological background and published examples of transparent reporting. The STROBE checklist is best used in conjunction with this article (freely available on the Web sites of PLoS Medicine at <http://www.plosmedicine.org/>, Annals of Internal Medicine at <http://www.annals.org/>, and Epidemiology at <http://www.epidem.com/>). Information on the STROBE Initiative is available at [www.strobe-statement.org](http://www.strobe-statement.org).

# BMJ Open

## The global, regional and national burden of inflammatory bowel disease in 204 countries and territories from 1990 to 2019, based on Global Burden Disease Study 2019

|                                 |                                                                                                                                                                                                                                                                                                                                |
|---------------------------------|--------------------------------------------------------------------------------------------------------------------------------------------------------------------------------------------------------------------------------------------------------------------------------------------------------------------------------|
| Journal:                        | <i>BMJ Open</i>                                                                                                                                                                                                                                                                                                                |
| Manuscript ID                   | bmjopen-2022-065186.R1                                                                                                                                                                                                                                                                                                         |
| Article Type:                   | Original research                                                                                                                                                                                                                                                                                                              |
| Date Submitted by the Author:   | 29-Nov-2022                                                                                                                                                                                                                                                                                                                    |
| Complete List of Authors:       | Wang, Rui; Central South University Third Xiangya Hospital; Central South University Third Xiangya Hospital<br>Li, Zhaoqi; Central South University Third Xiangya Hospital<br>Liu, Shaojun; Central South University Third Xiangya Hospital<br>Zhang, Decai; Central South University Third Xiangya Hospital, Gastroenterology |
| <b>Primary Subject Heading</b>: | Epidemiology                                                                                                                                                                                                                                                                                                                   |
| Secondary Subject Heading:      | Gastroenterology and hepatology                                                                                                                                                                                                                                                                                                |
| Keywords:                       | Inflammatory bowel disease < GASTROENTEROLOGY, EPIDEMIOLOGY, Gastroenterology < INTERNAL MEDICINE                                                                                                                                                                                                                              |
|                                 |                                                                                                                                                                                                                                                                                                                                |

SCHOLARONE™  
Manuscripts



I, the Submitting Author has the right to grant and does grant on behalf of all authors of the Work (as defined in the below author licence), an exclusive licence and/or a non-exclusive licence for contributions from authors who are: i) UK Crown employees; ii) where BMJ has agreed a CC-BY licence shall apply, and/or iii) in accordance with the terms applicable for US Federal Government officers or employees acting as part of their official duties; on a worldwide, perpetual, irrevocable, royalty-free basis to BMJ Publishing Group Ltd ("BMJ") its licensees and where the relevant Journal is co-owned by BMJ to the co-owners of the Journal, to publish the Work in this journal and any other BMJ products and to exploit all rights, as set out in our [licence](#).

The Submitting Author accepts and understands that any supply made under these terms is made by BMJ to the Submitting Author unless you are acting as an employee on behalf of your employer or a postgraduate student of an affiliated institution which is paying any applicable article publishing charge ("APC") for Open Access articles. Where the Submitting Author wishes to make the Work available on an Open Access basis (and intends to pay the relevant APC), the terms of reuse of such Open Access shall be governed by a Creative Commons licence – details of these licences and which [Creative Commons](#) licence will apply to this Work are set out in our licence referred to above.

Other than as permitted in any relevant BMJ Author's Self Archiving Policies, I confirm this Work has not been accepted for publication elsewhere, is not being considered for publication elsewhere and does not duplicate material already published. I confirm all authors consent to publication of this Work and authorise the granting of this licence.

1  
2  
3  
4 **The global, regional and national burden of inflammatory bowel disease in 204**  
5 **countries and territories from 1990 to 2019, based on Global Burden Disease**  
6 **Study 2019**  
7  
8  
9

10  
11 Rui Wang<sup>1,2</sup>, Zhaoqi Li<sup>1,2</sup>, Shaojun Liu<sup>1,2</sup>, Decai Zhang<sup>1,2\*</sup>  
12  
13

14  
15 1 Department of Gastroenterology, The Third Xiangya Hospital of Central South  
16 University, Changsha 410013, Hunan Province, China.  
17

18  
19 2 Hunan Key Laboratory of Nonresolving Inflammation and Cancer, Changsha  
20 410013, Hunan Province, China  
21  
22

23  
24  
25 \*Correspondence: Decai Zhang, Department of Gastroenterology, The Third Xiangya  
26 Hospital of Central South University, Changsha 410013, Hunan Province, China.  
27

28  
29 Email: decaizhang@csu.edu.cn  
30  
31

32  
33 Running title: Global burden of inflammatory bowel disease  
34  
35  
36  
37  
38  
39  
40  
41  
42  
43  
44  
45  
46  
47  
48  
49  
50  
51  
52  
53  
54  
55  
56  
57  
58  
59  
60

## Abstract

**Objectives** We aim to provide the most updated estimates on the global burden of inflammatory bowel disease (IBD) to improve management strategies.

**Design** We extracted data from the Global Burden of Disease (GBD) 2019 database to evaluate IBD burden with different measures in 204 countries and territories from 1990 to 2019.

**Setting** Studies from the GBD 2019 database generated by population-representative data sources identified through literature review and research collaborations were included.

**Participants** Patients with IBD diagnosis.

**Outcomes** Total numbers, age-standardised rates of prevalence, mortality and disability-adjusted life year (DALY), and their estimated annual percentage changes (EAPCs) were the main outcomes.

**Results** In 2019, there were approximately 4.9 million cases of IBD globally, with China and the United States having the highest number of cases [911405 and 762890 respectively (66.9 and 245.3 cases per 100 000 population respectively)]. Between 1990 and 2019, the global age-standardised rates of prevalence, deaths, and DALYs decreased (EAPC = -0.66, -0.69, and -1.04, respectively). However, age-standardised prevalence rate increased in 13 out of 21 GBD regions. And a total of 147 out of 204 countries or territories experienced an increase in age-standardised prevalence rate. From 1990 to 2019, IBD prevalent cases, deaths and DALYs were higher in females than males. Higher Socio-demographic Index (SDI) was associated with higher age-standardised prevalence rates.

**Conclusions** IBD will continue to be a major public health burden due to increasing numbers of prevalent cases, deaths, and DALYs. The epidemiology trends and disease burden of IBD have changed dramatically at regional and national level, so understanding these changes would be beneficial for policy makers to tackle IBD.

**Keywords:** Inflammatory bowel disease; Global burden of disease; Prevalence; Disability-adjusted life years; Estimated annual percentage change.

### **Strengths and limitations of this study**

This is the most updated estimate on IBD epidemiology globally, including 204 countries some of which were not assessed before.

GBD 2019 incorporated more studies, adjusted diagnostic criteria, and further improved data reliability, hence, presenting data more representative to individuals.

One of the limitations is heterogeneity in population and location between studies included.

Another limitation is the variability in study design and data collection methods also affects the precision of the estimates, which is only partially compensated in our analysis model.



## Introduction

Inflammatory bowel diseases (IBDs), including Crohn's disease and ulcerative colitis, are debilitating and chronic inflammatory disorders of the gastrointestinal tract that have no cure.<sup>1</sup> IBD is characterised by a relapsing-remitting course and a heterogeneous clinical presentation that includes episodes of abdominal pain, chronic diarrhea, rectal bleeding, and weight loss, which are often associated with systemic symptoms such as fatigue and occasionally fever.<sup>2</sup> Because IBD can cause significant morbidity and lead to complications such as strictures, fistulas, infections, and cancer, this disorder lead to substantial health care costs and place a great stress on health care systems.<sup>3,4</sup> Although the cause of IBD remains unknown, the pathogenesis of IBD is suggested to be associated with genetic susceptibility of the host, intestinal microbiota, other environmental factors (e.g., diet, smoking, and physiological stress), and immunological abnormalities.<sup>5</sup>

Traditionally, IBD has been regarded as a disease of the western world; however, studies over the last two decades have shown a rapid increasing incidence in newly industrialized countries in the Middle East, Asia, and South America.<sup>6</sup> Conversely, IBD incident rates appear to be plateauing in the Western world in the 21st century.<sup>7</sup> These significant changes highlight the need for a comparable, consistent and systematic analysis of disease burden and trends concerning IBD in different regions and countries, which can be used to give a convincing evidence for rational allocation of resources and health care planning in reducing the global burden of IBD.

The Global Burden of Diseases (GBD) 2019 Study, a systematic worldwide epidemiological study, assessed prevalence, morbidity, mortality, disability of 369 diseases by location, sex, age and year,<sup>8</sup> which provides a unique opportunity to understand the state of IBD. The purpose of this study was to use data from GBD 2019 study to determine the global, regional and national burden of IBD across 204 countries and territories from 1990 to 2019 by age, gender and social-development index (SDI). Our study provides updated estimates on IBD global epidemiology and provides data on some regions not assessed previously, or data-scarce locations, of which estimates mainly rely on predictive covariates or global trends with

1  
2  
3  
4 consideration of SDI level and data from a single country.  
5  
6

## 7 8 **Methods**

9  
10 The general methodology of GBD 2019 has been reported in detail in previous  
11 publications.<sup>8-11</sup> In brief, GBD Study collected data from censuses, household  
12 surveys, civil registration and vital statistics, disease registries, health service use,  
13 satellite imaging, disease notifications, and other sources.<sup>9</sup> A Bayesian  
14 meta-regression modelling tool, DisMod-MR 2.1, was used to model and derive  
15 estimates of the burden under several conditions in 204 countries and territories from  
16 1990 to 2019.<sup>9</sup> The model included all of the above available information for each  
17 disease and applied correcting process for known bias to derive country-specific  
18 estimates of prevalence and of the burden of diseases, which have been described in  
19 previous studies.<sup>8</sup> Uncertainty intervals (UIs) were generated for every metric using  
20 the 25th and 975th ordered 1000 draw values of the posterior distribution.<sup>9</sup>  
21  
22  
23  
24  
25  
26  
27  
28  
29

30 We extracted from the GBD database yearly crude and age-standardised estimates  
31 of different measures of the burden of IBD from 1990 to 2019 and the respective 95%  
32 UIs via the Global Health Data Exchange (GHDx) query tool (<http://ghdx.healthdata.org/gbd-results-tool>). For the GBD 2019 assessment, IBD was defined  
33 according to 10th revisions of the International Classification of Diseases (ICD-10:  
34 K50-K51.319, K51.5-K52, K52.8-K52.9). The variables obtained from the database  
35 included prevalent cases, death numbers, disability-adjusted life-years (DALYs)  
36 numbers, years of life lost (YLLs) numbers, years lived with disability (YLDs)  
37 numbers, and their corresponding age-standardised rates (ASRs) at the global,  
38 regional, and national levels. Prevalence rate (per 100 000) was defined as aggregated  
39 cases (including new cases and previously diagnosed cases) divided by the population  
40 size; mortality rate (per 100 000) was defined as the number of annual deaths divided  
41 by the total population size, and DALYs were calculated as the sum of YLLs and  
42 YLDs. These data were stratified by age (1-4, 5-9, every 5-year age group up to 95  
43 years, and 95 years and older), calendar year (1990-2019), region, and country (or  
44 territory). Geographically, the world was classified into 21 regions. Moreover, 204  
45  
46  
47  
48  
49  
50  
51  
52  
53  
54  
55  
56  
57  
58  
59  
60

1  
2  
3  
4 countries and territories were divided into five categories, according to the  
5 socio-demographic index (SDI). SDI was constructed based on the geometric mean of  
6 three indicators: the total fertility rate, income per capita, and average years of  
7 schooling among people aged 15 years or older, ranging from zero to one.<sup>12</sup> The  
8 larger the SDI, the more developed the country.<sup>13</sup>

13  
14 Estimated average percentage change (EAPC) was used to evaluate the trends in  
15 age-standardised rates of prevalence, death, and DALY over a specific period. The  
16 natural logarithm of age-standardised rate is assumed to be linear along with time;  
17 that is,  $y = \alpha + \beta x + \varepsilon$ , where  $y = \ln(\text{rate})$ ,  $x = \text{calendar year}$ , and  $\varepsilon = \text{error term}$ . Based on  
18 this formula,  $\beta$  represents the positive or negative age-standardised rate trends. EAPC  
19 was calculated as  $100 \times (\exp(\beta) - 1)$ , and its 95% confidence interval (CI) could also  
20 be calculated from this model.<sup>14</sup> The age-standardised indicator was recognized to be  
21 in an increasing trend if the 95% CI of the corresponding EAPC estimation  $> 0$ , to be  
22 a decreasing trend if the 95% CI  $< 0$ , and to be stable if the 95% CI included 0. All  
23 statistical analyses and visualizations were conducted using R statistical software  
24 program (version 4.1.0).  $P$  value  $< 0.05$  was considered statistically significant.

25  
26 Because the study was based on publicly available dataset, this study was exempted  
27 by the ethics committee of the Third Xiangya Hospital of Central South University.  
28 This study followed the guideline of cross-sectional study described in the Guidelines  
29 for Accurate and Transparent Health Estimates Reporting (GATHER).<sup>15</sup>

### 42 **Patient and public involvement**

43  
44 Patients and/or the public were not involved in the study design, or data interpretation,  
45 or manuscript drafting, or dissemination plans of this research.

## 50 **Results**

### 52 **Prevalence of IBD**

53  
54 Globally, IBD accounted for 3.32 million estimated cases (95% UI 2.90 to 3.79) in  
55 1990 and 4.90 million cases (4.35 to 5.50) in 2019, corresponding to an increase of  
56 47.45% between 1990 and 2019 (Supplementary Table 1 and Figure 1A). The global  
57 age-standardised prevalence rate of IBD decreased from 73.23 per 100 000 population  
58  
59  
60

(63.86 to 83.63) in 1990 to 59.25 per 100 000 population (52.78 to 66.47) in 2019 with the EAPC being -0.66 (95% CI -0.75 to -0.57) (Table 1; Figure 1B, 1C; and Figure 2A).

At regional level in 2019, the largest number of prevalent case was observed in Western Europe [1.03 million (95% UI 0.93 to 1.13)] (Supplementary Table 1), and the highest age-standardised prevalence rate was observed in High-income Asia Pacific [210.54 per 100 000 population (183.69 to 239.68)] (Figure 3A). From 1990 to 2019, an increase in total prevalent cases was seen across most of GBD regions, as shown in Figure 4A. However, age-standardised prevalence rate increased in 13 GBD regions and decreased in 5 regions, with the highest increasing trend in East Asia [EAPC = 2.79 (95% CI 2.41 to 3.18)] and the largest decrease in High-income North America [EAPC = -1.32 (-1.75 to -0.89)] (Figure 2B).

At national and territorial level in 2019, China and United States of America had the highest number of prevalent cases [911405 (95% UI 776347 to 1069533), 762890 (712357 to 813654), respectively] (Supplementary Table 2 and Figure 1A). In 2019, the highest age-standardised prevalence rates of IBD were observed in Norway [498.95 (429.41 to 570.55)] (Supplementary Table 3 and Figure 1B). Between 1990 and 2019, age-standardised prevalence rates were found in an increasing trend in 147 countries or territories, with the greatest increase in Taiwan (Province of China) [EAPC = 4.29 (95% CI 3.71 to 4.86)] (Figure 1C).

Overall, the global number of prevalent cases was higher in females than males in 2019 (Supplementary Table 1). While the age-standardised prevalence rate was similar between males and females in 2019 (Table 1). The highest peak of IBD prevalent cases and age-specific prevalence rate occurred at age 50-54 years and 60-64 years respectively both in females and males in 2019 (Figure 5A). From 1990 to 2019, the number of prevalent cases continued to increase in both sexes and was higher in females than males in all years. The age-standardised prevalence rate decreased in both sexes during the same period (Supplementary Figure 1).

### **Death of IBD**

In 2019, there were 40998 deaths (95% UI 34933 to 44661) due to IBD globally,

1  
2  
3  
4 which increased by 68.75% (47.12 to 94.62) from 24295 (20258 to 28376) in 1990  
5 (Supplementary Table 1 and Supplementary Figure 2). The global age-standardised  
6 death rate was 0.54 per 100 000 population (0.46 to 0.59) in 2019, which decreased  
7 from 0.67 per 100 000 population (0.57 to 0.78) in 1990, with the EAPC being -0.69  
8 (95% CI -0.81 to -0.57) (Table 1, Figure 2C, and Supplementary Figure 3-4).  
9  
10  
11  
12

13 At regional level, Western Europe was also the region with the largest number of  
14 deaths [11981 (95% UI 9244 to 13315)] and the highest age-standardised death rate  
15 [1.11 per 100 000 population (0.87 to 1.23)] in 2019 (Supplementary Table 1 and  
16 Figure 3B). From 1990 to 2019, most of GBD regions experienced an increase in total  
17 deaths of IBD (Figure 4B). However, age-standardised death rate declined in more  
18 than 60% of GBD regions, such as High-income Asia Pacific [EAPC = -4.29 (95% CI  
19 -4.64 to -3.93)], East Asia [EAPC = -3.98 (-4.33 to -3.63)], and Andean Latin  
20 America [EAPC = -2.74 (-3.16 to -2.32)] (Figure 2D).  
21  
22  
23  
24  
25  
26  
27  
28

29 At national and territorial level in 2019, China and United States of America also  
30 had the highest number of death cases [4676 (95% UI 3774 to 5461), 5910 (4622 to  
31 6464), respectively] (Supplementary Table 2 and Supplementary Figure 2).  
32 Netherlands had the highest age-standardised death rate in 2019 [2.08 per 100 000  
33 population (1.58 to 2.40)] (Supplementary Table 3 and Supplementary Figure 3).  
34 Between 1990 and 2019, more than 60% countries or territories experienced a  
35 decrease in age-standardised death rate of IBD, and the highest decrease was noted in  
36 Republic of Korea [EAPC = -7.96 (-8.67 to -7.25)] (Supplementary Figure 4).  
37  
38  
39  
40  
41  
42  
43  
44

45 Globally, death cases were higher in females than males in 2019 (Supplementary  
46 Table 1). And the age-standardised death rate was 0.56 per 100 000 population (95%  
47 UI 0.45 to 0.62) in males and 0.52 per 100 000 population (0.43 to 0.58) in females  
48 (Table 1). In 2019, the highest number of deaths was observed in males aged 80-84  
49 years and females aged 85-89 years, and the highest age-specific death rate was  
50 observed in the oldest age group ( $\geq 95$  years) for both sexes (Figure 5B). Between  
51 1990 and 2019, the deaths of IBD also continued to increase in both sexes and were  
52 higher in females than males in all years. However, the age-standardised death rate  
53 decreased in both sexes from 1990 to 2019 (Supplementary Figure 5).  
54  
55  
56  
57  
58  
59  
60

## DALY of IBD

Globally, 1.62 million (95% UI 1.36 to 1.92) DALYs, 0.73 million (0.49 to 0.99) YLDs, and 0.90 million (0.78 to 1.00) YLLs were due to IBD in 2019, which increased from 1990 by 29.98%, 47.96%, and 18.31%, respectively (Supplementary Table 1, Supplementary Table 4, and Supplementary Figure 6-9). The global age-standardised DALY rate decreased from 27.20 per 100 000 population (21.70 to 32.39) in 1990 to 20.15 per 100 000 population (16.86 to 23.71) in 2019, with the EAPC being -1.04 (95% CI -1.06 to -1.01) (Table 1, Figure 2E, and Supplementary Figure 10-11). The same decreased trend was found in the age-standardised YLL rate [EAPC = -1.33 (-1.37 to -1.30)] and the age-standardised YLD rate [EAPC = -0.62 (-0.70 to -0.53)] (Supplementary Table 5 and Supplementary Figure 12-14).

At regional level, Western Europe had the largest DALYs [310691 (95% UI 255911 to 371106)] in 2019 (Supplementary Table 1). The highest age-standardised DALY rates in 2019 were observed in High-income North America [51.27 per 100 000 population (95% UI 40.90 to 62.35)] (Figure 3C). As shown in Figure 4C, an increase in total DALYs was found across most of GBD regions from 1990 to 2019. While most of the GBD regions had a decreased trend in age-standardised DALY rate, with the largest decrease in Andean Latin America [EAPC = -3.68 (95% CI -4.17 to -3.18)] (Figure 2F).

At national and territorial level in 2019, China and United States of America had the highest number of DALYs [232464 (95% UI 179903 to 291090), 215289 (175991 to 256059), respectively] (Supplementary Table 2 and Supplementary Figure 6). The highest age-standardised DALY rate was observed in Norway in 2019 [80.37 per 100 000 population (56.25 to 108.56)] (Supplementary Table 3 and Supplementary Figure 10). From 1990 to 2019, more than 65% countries or territories experienced a decrease in age-standardised DALY rate of IBD, and the highest decrease was founded in Peru [EAPC = -5.08 (95% CI -5.69 to -4.47)] (Supplementary Figure 11).

In 2019, the global number of DALYs was also higher in females than males (Supplementary Table 1). The age-standardised DALY rate was 20.6 per 100 000 population (95% UI 17.2 to 24.3) in males and 19.7 per 100 000 population (16.2 to



23.5) in females (Table 1). And the number of DALYs was highest in males aged 50-54 years and females aged 55-59 years (Figure 5C). The highest number of YLLs occurred in the group aged 65-69 years [75234, (63865 to 83022)], while the highest number of YLDs occurred in the group aged 45-49 years [80776, (53187 to 113688)] (Supplementary Figure 15). As with prevalent cases and deaths, the DALYs continued to increase in both sexes and were higher in females than males in all years from 1990 to 2019. And the age-standardised DALY rate decreased in both sexes between 1990 and 2019 (Supplementary Figure 16).

### **Burden of IBD by SDI**

Higher SDI was associated with higher age-standardised prevalence rates of IBD, with values that were higher than the global rate in high and high-middle SDI quintiles, and lower than the global rate in the other three SDI quintiles (Table 1). High SDI quintile had the highest age-standardised prevalence rate, death rate and DALY rate in 2019. Between 1990 and 2019, age-standardised death rate and age-standardised DALY rate decreased in all SDI quintiles except the high SDI quintile, where it increased [EAPC = 0.82 (95% CI 0.64 to 1.01)] and remained stable [EAPC = 0.00 (-0.06 to 0.05)], respectively (Table 1 and Figure 2C, 2E). Whereas, age-standardised prevalence rate decreased in high and high-middle SDI quintiles and increased in other three SDI quintiles during the observation period (Table 1 and Figure 2A).

The observed global and regional age-standardised prevalence, death, and DALY rates in relation to SDI are shown in Figure 6, expressed in the annual time series from 1990 to 2019. Regions generally followed the trend of increased death and DALY rates with higher SDI. However, more than 60% of the regions showed an increase trend in age-standardised prevalence rate during this study period. At the global level, the age-standardised prevalence, death, and DALY rates dropped with increasing SDI values but above the expected levels during the past 30 years.

### **Discussion**

In this study, we comprehensively analyzed the temporal trend in IBD burden at the global, regional, and national levels. GBD 2019 reported 4.90 million IBD estimates globally in 2019 and 4.79 million in 2017, while GBD 2017 reported 6.85 million in



1  
2  
3  
4 2017.<sup>16</sup> The discrepancy could be partly attributed to the improved specificity of case  
5 definition since GBD 2019 adjusted administrative data inputs toward expected  
6 stringent diagnosis using previously published IBD data with ICD codes.<sup>11</sup> In  
7 addition, GBD 2019 improved model fit prevalence and incidence by setting more  
8 plausible bounds on excess mortality rate and passing less-informative priors to lower  
9 levels of the geographical hierarchy in DisMod-MR 2.1.<sup>11</sup> Indeed, GBD 2019 study  
10 provides the most current overview of the burden of IBD. It incorporated more data  
11 sources, with some carried out in regions not previously assessed, providing updated  
12 estimates on IBD global epidemiology.<sup>11</sup> Besides, GBD 2019 updated the bias  
13 adjustment, which further improved the data reliability.<sup>11</sup> After these adjustments, our  
14 study confirmed two epidemiological shifts in IBD since 1990. The number of  
15 prevalent cases increased globally since 1990, with China and United States of  
16 America in the top number of cases. The age-standardised rates of death and DALYs  
17 decreased, implying significant improvements in IBD management. The changing  
18 trend and geographical patterns made implications for policy-makers to prioritise IBD  
19 management, especially in newly industrialised countries.

20  
21  
22  
23  
24  
25  
26  
27  
28  
29  
30  
31  
32  
33  
34  
35 The highest age-standardised prevalence rates were observed in High-income North  
36 America, Western Europe, and High-income Asia Pacific. The pattern was also shown  
37 in the high SDI countries such as Norway and Canada. This is consistent with several  
38 previous meta-analysis,<sup>6,17</sup> and might correlate with several risk factors of IBD.<sup>18,19</sup>  
39 Deeply processed food with low fiber, high fat, and sugar is a risk factor for decreased  
40 microbial species.<sup>20-22</sup> Others include smoking, hygiene, latitude resulting in vitamin  
41 D/sun exposure.<sup>23,24</sup> Though the largest reduction in age-standardised prevalence rate  
42 was also observed in High-income North America, which was consistent with some  
43 of the previous reports,<sup>6,25</sup> indicating the shift of the epidemiological stages of IBD in  
44 western countries.<sup>26,27</sup>

45  
46  
47  
48  
49  
50  
51  
52  
53  
54  
55  
56  
57  
58  
59  
60  
Despite increasing numbers of prevalent cases, the global age-standardised prevalence rate showed a decreasing trend. The discrepancy reflects denominator effects of increasing global population and age-specific effects.<sup>28</sup> Coward S and his colleagues<sup>29</sup> reported that the prevalence rate in elderly and adults was ten times more

1  
2  
3  
4 than pediatric in Canada. The trend in age-standardised prevalence rate differed  
5 substantially between the GBD regions. The highest increasing trend was observed in  
6 East Asia. At the national level, China, with a total number of 911405 IBD patients,  
7 was a prominent contribution to the total numbers of global IBD. The pattern is  
8 consistent with several previous report,<sup>6,30</sup> which is related mainly to urbanization,  
9 industrialization, and some area cultural westernization in China.<sup>31</sup> With  
10 epidemiological surveillance strategies shifting from paper-record to electronic  
11 healthcare databases using International Classification of Disease (ICD) codes,  
12 advances in health-care facilities like the implementation of endoscopy,<sup>32</sup> detection  
13 and diagnosis of IBD also increased.

23 IBD causes body disability.<sup>33,34</sup> Consistent with the previous study,<sup>4</sup> the  
24 age-standardised DALY and mortality rate showed a decreasing trend globally,  
25 especially in East Asia, likely resulting from the improved treatment strategy such as  
26 early use of biological agents and patient support programs.<sup>35</sup> The introduction of  
27 biological agents improved life quality and reduced surgery rate.<sup>30,36</sup> Unfortunately,  
28 the cost of biologic therapy is considerable, estimated at more than US\$25,000 per  
29 year.<sup>37</sup> More attention should be paid in optimizing patient selection, dosing and  
30 withdrawal.

38 There are some limitations of our study. First, the accuracy of the estimated IBD  
39 burden largely depends on the availability and quality of data acquired, which could  
40 be partially compensated by statistical methods. However, in regions with scarce data,  
41 especially in low-SDI countries, estimates could only rely on predictive covariates or  
42 global trends with consideration of SDI level and data from a single country, which is  
43 less representative. Extra cautions should be made when interpreting data in these  
44 areas. Additional high-quality population-based studies should be done, especially in  
45 countries with scarce data. Second, estimates discrepancies compared to some of the  
46 previously published studies could be further improved, although GBD 2019 has  
47 improved model fit to prevalence and incidence, partly overcoming the discrepancies.  
48 For example, the prevalence rate in Canada was only 46 to 57 per 100,000 population  
49 in GBD 2017. However, around 520 per 100,000 population was reported by a  
50  
51  
52  
53  
54  
55  
56  
57  
58  
59  
60

1  
2  
3  
4 previous large population-based study in Canada.<sup>38</sup> GBD 2019 reported 357.73 in  
5  
6 100,000 population after adjustment. Third, UC-specific and CD-specific trends were  
7  
8 not assessed due to the lack of relevant data. The association between IBD and certain  
9  
10 risk factors should also be included in the future. Nevertheless, GBD 2019 provided  
11  
12 the most up-to-date estimated IBD global epidemiology for the last three decades and  
13  
14 implications for new hypotheses. It has covered 204 countries. Therefore, it generates  
15  
16 more representative data and can compensate for biases in individual literatures.

### 17 **Conclusions**

18  
19 Despite the reduction in age-standardised rate of prevalence, death, and DALY,  
20  
21 IBD will continue to be a major public health burden due to increasing numbers of  
22  
23 prevalent cases globally. However, the trend has shifted substantially since 1990.  
24  
25 When the age-standardised prevalence rate rapidly increases in newly industrialized  
26  
27 countries especially in east Asia, the incidence has been stabilized or even decreased  
28  
29 in western countries like high-income north America. The prevalence of IBD in newly  
30  
31 industrialized countries is quickly approaching western countries. More systematic  
32  
33 epidemiologic monitoring strategies, especially in low-SDI countries and risk factors  
34  
35 integrated into the estimate model of the GBD Study would further facilitate IBD  
36  
37 management. Our findings might help some policymakers to justify medical resources  
38  
39 allocation, especially in low SDI countries.

### 40 41 **Abbreviations**

42  
43 EAPC, estimated annual percentage change; IBD, inflammatory bowel disease; SDI,  
44  
45 socio-demographic index; GBD, Global Burden of Disease, Injuries, and Risk Factors  
46  
47 Study; DALYs, disability adjusted life years; YLDs, years of life lived with disability;  
48  
49 YLLs, years of life lost; IHME, Institute for Health Metrics and Evaluation;  
50  
51 GATHER, Guidelines for Accurate and Transparent Health Estimates Reporting;  
52  
53 ASR, age-standardised rate; UI, uncertainty interval; CI, confidence interval.

### 54 55 56 57 **Ethics approval and consent to participate**

58  
59 This study did not involve human participants and the study did not need ethics  
60

1  
2  
3 approval because it used publicly available data.  
4  
5  
6

### 7 **Consent for publication**

8 Not applicable.  
9  
10  
11  
12

### 13 **Data availability statement**

14  
15 Data are available in a public, open access repository. Data are publicly available at  
16 the Institute for Health Metrics and Evaluation (IHME) website  
17 (<http://www.ghdx.healthdata.org/gbd-results-tool>).  
18  
19  
20  
21  
22

### 23 **Declaration of interests**

24 The authors declare no conflict of interests.  
25  
26  
27  
28

### 29 **Funding**

30 This work was supported by the National Science Foundation of China (Grant No.  
31 82000527) and the Natural Science Foundation of Hunan Province (Grant No.  
32 2022JJ30909).  
33  
34  
35  
36  
37  
38

### 39 **Disclaimer**

40 The funding source had no role in the design, conduct or reporting of the study.  
41  
42  
43  
44

### 45 **Author Contributions**

46 Study concept and design: Decai Zhang and Rui Wang. Acquisition of data: Zhaoqi Li  
47 and Shaojun Liu. Data analysis and interpretation: Rui Wang RW, Zhaoqi Li, Shaojun  
48 Liu, and Decai Zhang. Drafting the manuscript: Decai Zhang and Rui Wang. Critical  
49 revision of manuscript: all authors. All authors had full access to all the data in the  
50 study and had final responsibility for the decisions to submit for publication.  
51  
52  
53  
54  
55  
56  
57

### 58 **Acknowledgements**

59 We would like to thank all members of the Institute for Health Metrics and Evaluation  
60

(IHME), and Bill & Melinda Gates Foundation which support the related GBD 2019 studies.

### Authors' information

<sup>1</sup>Department of Gastroenterology, The Third Xiangya Hospital of Central South University, Changsha 410013, Hunan Province, China. <sup>2</sup>Hunan Key Laboratory of Nonresolving Inflammation and Cancer, Changsha 410013, Hunan Province, China.

### References

1. Seyed Tabib NS, Madgwick M, Sudhakar P, Verstockt B, Korcsmaros T, Vermeire S. Big data in IBD: big progress for clinical practice. *Gut*. 2020;69(8):1520-1532.
2. Magro F, Gionchetti P, Eliakim R, et al. Third European Evidence-based Consensus on Diagnosis and Management of Ulcerative Colitis. Part 1: Definitions, Diagnosis, Extra-intestinal Manifestations, Pregnancy, Cancer Surveillance, Surgery, and Ileo-anal Pouch Disorders. *J Crohns Colitis*. 2017;11(6):649-670.
3. Agrawal M, Spencer EA, Colombel JF, Ungaro RC. Approach to the Management of Recently Diagnosed Inflammatory Bowel Disease Patients: A User's Guide for Adult and Pediatric Gastroenterologists. *Gastroenterology*. 2021;161(1):47-65.
4. Piovani D, Danese S, Peyrin-Biroulet L, Bonovas S. Inflammatory bowel disease: estimates from the global burden of disease 2017 study. *Aliment Pharmacol Ther*. 2020;51(2):261-270.
5. Guan Q. A Comprehensive Review and Update on the Pathogenesis of Inflammatory Bowel Disease. *J Immunol Res*. 2019;2019:7247238.
6. Ng SC, Shi HY, Hamidi N, et al. Worldwide incidence and prevalence of inflammatory bowel disease in the 21st century: a systematic review of population-based studies. *Lancet*. 2017;390(10114):2769-2778.
7. Khalili H. The Changing Epidemiology of Inflammatory Bowel Disease: What Goes Up May Come Down. *Inflamm Bowel Dis*. 2020;26(4):591-592.
8. Collaborators GBDD. Global age-sex-specific fertility, mortality, healthy life expectancy (HALE), and population estimates in 204 countries and territories, 1950-2019: a comprehensive demographic analysis for the Global Burden of Disease Study 2019. *Lancet*. 2020;396(10258):1160-1203.
9. Diseases GBD, Injuries C. Global burden of 369 diseases and injuries in 204 countries and territories, 1990-2019: a systematic analysis for the Global Burden of Disease Study 2019. *Lancet*. 2020;396(10258):1204-1222.
10. Collaborators GBDUHC. Measuring universal health coverage based on an index of effective coverage of health services in 204 countries and territories, 1990-2019: a systematic analysis for the Global Burden of Disease Study 2019. *Lancet*. 2020;396(10258):1250-1284.
11. Collaborators GBDRF. Global burden of 87 risk factors in 204 countries and territories, 1990-2019: a systematic analysis for the Global Burden of Disease Study 2019. *Lancet*.

- 2020;396(10258):1223-1249.
12. Collaborators GBDM. Global, regional, and national under-5 mortality, adult mortality, age-specific mortality, and life expectancy, 1970-2016: a systematic analysis for the Global Burden of Disease Study 2016. *Lancet*. 2017;390(10100):1084-1150.
  13. Alcohol GBD, Drug Use C. The global burden of disease attributable to alcohol and drug use in 195 countries and territories, 1990-2016: a systematic analysis for the Global Burden of Disease Study 2016. *Lancet Psychiatry*. 2018;5(12):987-1012.
  14. Deng Y, Zhao P, Zhou L, et al. Epidemiological trends of tracheal, bronchus, and lung cancer at the global, regional, and national levels: a population-based study. *J Hematol Oncol*. 2020;13(1):98.
  15. Stevens GA, Alkema L, Black RE, et al. Guidelines for Accurate and Transparent Health Estimates Reporting: the GATHER statement. *Lancet*. 2016;388(10062):e19-e23.
  16. Collaborators GBDIBD. The global, regional, and national burden of inflammatory bowel disease in 195 countries and territories, 1990-2017: a systematic analysis for the Global Burden of Disease Study 2017. *Lancet Gastroenterol Hepatol*. 2020;5(1):17-30.
  17. Ye Y, Manne S, Treem WR, Bennett D. Prevalence of Inflammatory Bowel Disease in Pediatric and Adult Populations: Recent Estimates From Large National Databases in the United States, 2007-2016. *Inflamm Bowel Dis*. 2020;26(4):619-625.
  18. de Souza HSP, Fiocchi C, Iliopoulos D. The IBD interactome: an integrated view of aetiology, pathogenesis and therapy. *Nat Rev Gastroenterol Hepatol*. 2017;14(12):739-749.
  19. Ng SC, Tsoi KK, Kamm MA, et al. Genetics of inflammatory bowel disease in Asia: systematic review and meta-analysis. *Inflamm Bowel Dis*. 2012;18(6):1164-1176.
  20. Ananthakrishnan AN, Khalili H, Konijeti GG, et al. A prospective study of long-term intake of dietary fiber and risk of Crohn's disease and ulcerative colitis. *Gastroenterology*. 2013;145(5):970-977.
  21. Suez J, Korem T, Zeevi D, et al. Artificial sweeteners induce glucose intolerance by altering the gut microbiota. *Nature*. 2014;514(7521):181-186.
  22. Ananthakrishnan AN. Environmental risk factors for inflammatory bowel diseases: a review. *Dig Dis Sci*. 2015;60(2):290-298.
  23. Kaplan GG, Ng SC. Understanding and Preventing the Global Increase of Inflammatory Bowel Disease. *Gastroenterology*. 2017;152(2):313-321 e312.
  24. Piovani D, Danese S, Peyrin-Biroulet L, Bonovas S. Environmental, Nutritional, and Socioeconomic Determinants of IBD Incidence: A Global Ecological Study. *J Crohns Colitis*. 2020;14(3):323-331.
  25. Zhao M, Gonczi L, Lakatos PL, Burisch J. The Burden of Inflammatory Bowel Disease in Europe in 2020. *J Crohns Colitis*. 2021;15(9):1573-1587.
  26. Kaplan GG, Windsor JW. The four epidemiological stages in the global evolution of inflammatory bowel disease. *Nat Rev Gastroenterol Hepatol*. 2021;18(1):56-66.
  27. Kaplan GG. The global burden of IBD: from 2015 to 2025. *Nat Rev Gastroenterol Hepatol*. 2015;12(12):720-727.
  28. Collaborators GBDM. Global, regional, and national age-sex-specific mortality and life expectancy, 1950-2017: a systematic analysis for the Global Burden of Disease Study 2017. *Lancet*. 2018;392(10159):1684-1735.
  29. Coward S, Clement F, Benchimol EI, et al. Past and Future Burden of Inflammatory Bowel



- Diseases Based on Modeling of Population-Based Data. *Gastroenterology*. 2019;156(5):1345-1353 e1344.
30. Qiu Y, Ren W, Liu Y, Chen WE, Pan XH, Ren JJ. Disease burden of inflammatory bowel disease in China from 1990 to 2017: Findings from the global burden of diseases 2017. *EClinicalMedicine*. 2020;27:100544.
  31. Su HJ, Chiu YT, Chiu CT, et al. Inflammatory bowel disease and its treatment in 2018: Global and Taiwanese status updates. *J Formos Med Assoc*. 2019;118(7):1083-1092.
  32. Pavlovic-Calic N, Salkic NN, Gegic A, Smajic M, Alibegovic E. Crohn's disease in Tuzla region of Bosnia and Herzegovina: a 12-year study (1995-2006). *Int J Colorectal Dis*. 2008;23(10):957-964.
  33. Shafer LA, Sofia MA, Rubin DT, et al. An International Multicenter Comparison of IBD-Related Disability and Validation of the IBDDI. *Clin Gastroenterol Hepatol*. 2021;19(12):2524-2531.
  34. Marinelli C, Zingone F, Inferrera M, et al. Factors associated with disability in patients with ulcerative colitis: A cross-sectional study. *J Dig Dis*. 2020;21(2):81-87.
  35. Jones JL, Nguyen GC, Benchimol EI, et al. The Impact of Inflammatory Bowel Disease in Canada 2018: Quality of Life. *J Can Assoc Gastroenterol*. 2019;2(Suppl 1):S42-S48.
  36. Frolkis AD, Lipton DS, Fiest KM, et al. Cumulative incidence of second intestinal resection in Crohn's disease: a systematic review and meta-analysis of population-based studies. *Am J Gastroenterol*. 2014;109(11):1739-1748.
  37. Marchetti M, Liberato NL. Biological therapies in Crohn's disease: are they cost-effective? A critical appraisal of model-based analyses. *Expert Rev Pharmacoecon Outcomes Res*. 2014;14(6):815-824.
  38. Benchimol EI, Manuel DG, Guttmann A, et al. Changing age demographics of inflammatory bowel disease in Ontario, Canada: a population-based cohort study of epidemiology trends. *Inflamm Bowel Dis*. 2014;20(10):1761-1769.

### Figure legends

**Figure 1.** The global prevalence burden of IBD in 204 countries and territories. (A) The absolute number of IBD prevalent cases in 2017. (B) The age-standardised prevalence rate (per 100 000 population) of IBD in 2017. (C) The EAPC of age-standardised prevalence rate for IBD between 1990 and 2019.

EAPC=estimated annual percentage change. IBD=inflammatory bowel disease.

**Figure 2.** The EAPCs in age-standardised rates of prevalence (A, B), deaths (C, D), and DALYs (E, F) due to IBD from 1990 to 2019, both sexes, by GBD region, and by SDI quintile.

DALYs=disability adjusted life years. EAPC=estimated annual percentage change. GBD=Global Burden of Disease. IBD=inflammatory bowel disease. SDI=Socio-demographic Index.

**Figure 3.** The age-standardised rates of prevalence (A), deaths (B), and DALYs (C) due to IBD by sex, across 21 regions, in 2019.

Error bars indicate the 95% uncertainty interval (UI) for the age-standardised rates.



1  
2  
3 DALYs=disability adjusted life years. IBD=inflammatory bowel disease.  
4  
5

6 **Figure 4.** The absolute number of prevalent cases (A), deaths (B), and DALYs (C)  
7 due to IBD for all GBD regions from 1990 to 2019.

8 DALYs=disability adjusted life years. GBD=Global Burden of Disease.  
9 IBD=inflammatory bowel disease.  
10  
11

12 **Figure 5.** Age patterns by sex of the total number and age-standardised rates of  
13 prevalent cases (A), deaths (B), and DALYs (C) due to IBD at the global level in  
14 2019.

15  
16 Error bars indicate the 95% uncertainty interval (UI) for the number of cases. Shading  
17 indicates the 95% UI for the rates. DALYs=disability adjusted life years.  
18 IBD=inflammatory bowel disease.  
19  
20

21 **Figure 6.** The age-standardised rates of IBD prevalence (A), deaths (B), and DALYs  
22 globally and for 21 GBD regions by SDI from 1990 to 2019.

23 The expected age-standardised rates in 2019 based solely on SDI were represented by  
24 the black line. For each region, points from left to right depict estimates from each  
25 year from 1990 to 2019. DALYs=disability adjusted life years. GBD=Global Burden  
26 of Disease. IBD=inflammatory bowel disease. SDI=Socio-demographic Index.  
27  
28  
29  
30  
31  
32  
33  
34  
35  
36  
37  
38  
39  
40  
41  
42  
43  
44  
45  
46  
47  
48  
49  
50  
51  
52  
53  
54  
55  
56  
57  
58  
59  
60

**Table 1** Age-standardised prevalence, death and DALY rates for inflammatory bowel disease (IBD) in 1990 and 2019 and their temporal trends from 1990 to 2019

| Characteristics         | Age-standardised prevalence rate |                              |                           | Age-standardized death rate |                        |                           | Age-standardized DALY rate |                           |                           |
|-------------------------|----------------------------------|------------------------------|---------------------------|-----------------------------|------------------------|---------------------------|----------------------------|---------------------------|---------------------------|
|                         | per 100,000 population           |                              |                           | per 100,000 population      |                        |                           | per 100,000 population     |                           |                           |
|                         | 1990 No.<br>(95%UI)              | 2019 No.<br>(95%UI)          | EAPC No.<br>(95%CI)       | 1990 No.<br>(95%UI)         | 2019 No.<br>(95%UI)    | EAPC No.<br>(95%CI)       | 1990 No.<br>(95%UI)        | 2019 No.<br>(95%UI)       | EAPC No.<br>(95%CI)       |
| Global                  | 73.23 (63.86<br>to 83.63)        | 59.25 (52.78<br>to 66.47)    | -0.66 (-0.75<br>to -0.57) | 0.67 (0.57<br>to 0.78)      | 0.54 (0.46<br>to 0.59) | -0.69 (-0.81<br>to -0.57) | 27.20 (21.70<br>to 32.39)  | 20.15 (16.86<br>to 23.71) | -1.04 (-1.06<br>to -1.01) |
| Sex                     |                                  |                              |                           |                             |                        |                           |                            |                           |                           |
| Male                    | 71.52 (62.12<br>to 81.89)        | 59.30 (52.60<br>to 66.91)    | -0.56 (-0.64<br>to -0.49) | 0.69 (0.56<br>to 0.88)      | 0.56 (0.45<br>to 0.62) | -0.78 (-0.83<br>to -0.72) | 27.40 (21.78<br>to 33.22)  | 20.64 (17.16<br>to 24.31) | -0.99 (-1.01<br>to -0.97) |
| Female                  | 75.01 (65.67<br>to 85.45)        | 59.33 (52.89<br>to 66.18)    | -0.74 (-0.85<br>to -0.64) | 0.63 (0.50<br>to 0.74)      | 0.52 (0.43<br>to 0.58) | -0.64 (-0.80<br>to -0.47) | 27.09 (20.30<br>to 32.42)  | 19.70 (16.16<br>to 23.49) | -1.09 (-1.12<br>to -1.06) |
| SDI quintile            |                                  |                              |                           |                             |                        |                           |                            |                           |                           |
| High                    | 200.83 (176.43 to<br>226.92)     | 183.14 (166.58 to<br>201.17) | -0.34 (-0.43<br>to -0.24) | 0.72 (0.65<br>to 0.85)      | 0.84 (0.69<br>to 0.92) | 0.82 (0.64<br>to 1.01)    | 43.95 (34.13<br>to 55.06)  | 42.93 (33.66<br>to 53.08) | 0.00 (-0.06<br>to 0.05)   |
| High-middle             | 82.41 (71.42<br>to 95.06)        | 73.85 (65.38<br>to 83.09)    | -0.32 (-0.47<br>to -0.18) | 0.52 (0.46<br>to 0.60)      | 0.38 (0.34<br>to 0.43) | -1.17 (-1.32<br>to -1.02) | 25.92 (21.34<br>to 30.93)  | 19.34 (15.59<br>to 23.73) | -1.12 (-1.17<br>to -1.07) |
| Middle                  | 22.50 (19.00<br>to 26.62)        | 30.57 (25.70<br>to 36.01)    | 1.25 (1.04 to<br>1.47)    | 0.57 (0.40<br>to 0.74)      | 0.31 (0.26<br>to 0.34) | -2.44 (-2.59<br>to -2.29) | 18.11 (14.29<br>to 21.72)  | 11.61 (9.70<br>to 13.71)  | -1.63 (-1.68<br>to -1.58) |
| Low-middle              | 19.02 (15.75<br>to 22.93)        | 20.94 (17.41<br>to 25.11)    | 0.52 (0.40 to<br>0.64)    | 0.74 (0.47<br>to 1.06)      | 0.48 (0.38<br>to 0.58) | -1.75 (-1.90<br>to -1.60) | 23.29 (16.18<br>to 30.53)  | 15.37 (12.47<br>to 18.32) | -1.58 (-1.65<br>to -1.51) |
| Low                     | 12.40 (10.21<br>to 15.06)        | 12.85 (10.64<br>to 15.81)    | 0.29 (0.19 to<br>0.39)    | 0.67 (0.48<br>to 0.99)      | 0.55 (0.43<br>to 0.70) | -0.80 (-0.86<br>to -0.74) | 22.19 (14.49<br>to 29.80)  | 17.19 (13.57<br>to 21.70) | -0.94 (-0.99<br>to -0.89) |
| GBD region              |                                  |                              |                           |                             |                        |                           |                            |                           |                           |
| Andean Latin<br>America | 16.55 (14.08<br>to 19.39)        | 17.09 (14.60<br>to 19.88)    | 0.06 (0.03 to<br>0.10)    | 0.54 (0.36<br>to 0.71)      | 0.26 (0.20<br>to 0.32) | -2.74 (-3.16<br>to -2.32) | 26.36 (15.78<br>to 38.96)  | 9.83 (7.75<br>to 12.19)   | -3.68 (-4.17<br>to -3.18) |
| Australasia             | 108.86 (92.21 to<br>126.63)      | 156.30 (137.65 to<br>177.07) | 0.83 (0.61 to<br>1.05)    | 0.54 (0.47<br>to 0.64)      | 0.72 (0.53<br>to 0.83) | 1.77 (1.41<br>to 2.13)    | 26.19 (20.48<br>to 32.91)  | 34.98 (26.87<br>to 44.64) | 0.93 (0.75<br>to 1.12)    |
| Caribbean               | 27.93 (23.96<br>to 32.85)        | 26.31 (22.13<br>to 31.28)    | -0.05 (-0.13<br>to 0.03)  | 0.56 (0.44<br>to 0.69)      | 0.42 (0.31<br>to 0.53) | -1.24 (-1.41<br>to -1.08) | 23.38 (16.68<br>to 34.05)  | 18.21 (13.08<br>to 24.76) | -0.91 (-1.06<br>to -0.76) |
| Central Asia            | 76.86 (64.98<br>to 91.56)        | 78.72 (66.39<br>to 93.40)    | 0.09 (0.05 to<br>0.12)    | 0.39 (0.30<br>to 0.46)      | 0.32 (0.28<br>to 0.37) | -1.00 (-1.12<br>to -0.89) | 26.11 (21.03<br>to 31.71)  | 22.26 (18.04<br>to 27.31) | -0.70 (-0.76<br>to -0.65) |
| Central Europe          | 208.99 (179.90 to<br>243.75)     | 160.49 (145.58 to<br>176.95) | -1.25 (-1.64<br>to -0.87) | 0.46 (0.43<br>to 0.52)      | 0.47 (0.40<br>to 0.55) | 0.30 (0.17<br>to 0.44)    | 46.28 (36.16<br>to 57.91)  | 35.84 (27.66<br>to 44.67) | -1.08 (-1.37<br>to -0.78) |

|    |                                                                                    |               |              |                |            |              |              |              |              |              |
|----|------------------------------------------------------------------------------------|---------------|--------------|----------------|------------|--------------|--------------|--------------|--------------|--------------|
| 1  |                                                                                    |               |              |                |            |              |              |              |              |              |
| 2  |                                                                                    |               |              |                |            |              |              |              |              |              |
| 3  | Central Latin                                                                      | 37.84 (32.42  | 32.59 (27.93 | -0.49 (-0.58   | 0.32 (0.28 | 0.37 (0.30   | 0.98 (0.68   | 14.84 (12.69 | 14.68 (12.25 | 0.32 (0.08   |
| 4  | America                                                                            | to 44.16)     | to 38.07)    | to -0.41)      | to 0.35)   | to 0.43)     | to 1.28)     | to 17.31)    | to 17.41)    | to 0.56)     |
| 5  |                                                                                    |               |              |                |            |              |              |              |              |              |
| 6  | Central                                                                            |               |              |                |            |              |              |              |              |              |
| 7  | Sub-Saharan                                                                        | 8.22 (6.76 to | 8.21 (6.80   | -0.14 (-0.33   | 0.72 (0.51 | 0.60 (0.45   | -0.69 (-0.77 | 22.26 (14.75 | 17.77 (12.98 | -0.79 (-0.88 |
| 8  | Africa                                                                             | 10.11)        | to 10.11)    | to 0.06)       | to 1.03)   | to 0.83)     | to -0.60)    | to 32.74)    | to 24.27)    | to -0.70)    |
| 9  |                                                                                    |               |              |                |            |              |              |              |              |              |
| 10 | East Asia                                                                          | 22.51 (18.72  | 46.22 (39.36 | 2.79 (2.41 to  | 0.86 (0.59 | 0.31 (0.25   | -3.98 (-4.33 | 24.23 (17.74 | 13.08 (10.31 | -2.31 (-2.48 |
| 11 |                                                                                    | to 26.72)     | to 53.98)    | 3.18)          | to 1.14)   | to 0.35)     | to -3.63)    | to 29.83)    | to 16.19)    | to -2.15)    |
| 12 |                                                                                    |               |              |                |            |              |              |              |              |              |
| 13 | Eastern Europe                                                                     | 88.07 (75.40  | 82.82 (70.77 | 0.01 (-0.11 to | 0.49 (0.38 | 0.51 (0.43   | -0.25 (-0.53 | 27.68 (21.86 | 26.67 (21.96 | -0.30 (-0.45 |
| 14 |                                                                                    | to 103.25)    | to 96.45)    | 0.14)          | to 0.56)   | to 0.58)     | to 0.04)     | to 33.71)    | to 32.46)    | to -0.14)    |
| 15 | Eastern                                                                            |               |              |                |            |              |              |              |              |              |
| 16 | Sub-Saharan                                                                        | 6.27 (5.25 to | 7.21 (6.01   | 0.46 (0.42 to  | 0.72 (0.52 | 0.69 (0.50   | -0.12 (-0.20 | 22.58 (16.13 | 19.44 (14.69 | -0.46 (-0.54 |
| 17 | Africa                                                                             | 7.68)         | to 8.82)     | 0.50)          | to 1.01)   | to 0.93)     | to -0.05)    | to 33.35)    | to 25.63)    | to -0.39)    |
| 18 |                                                                                    |               |              |                |            |              |              |              |              |              |
| 19 | High-income                                                                        | 126.18        | 210.54       | 1.04 (0.68 to  | 0.40 (0.24 | 0.13 (0.11   | -4.29 (-4.64 | 26.43 (19.87 | 34.55 (23.75 | 0.35 (0.11   |
| 20 | Asia Pacific                                                                       | (105.73 to    | (183.69 to   | 1.41)          | to 0.47)   | to 0.18)     | to -3.93)    | to 33.86)    | to 46.76)    | to 0.60)     |
| 21 |                                                                                    | 149.32)       | 239.68)      |                |            |              |              |              |              |              |
| 22 |                                                                                    |               |              |                |            |              |              |              |              |              |
| 23 | High-income                                                                        | 346.93        | 209.60       | -1.32 (-1.75   | 0.68 (0.61 | 0.97 (0.79   | 1.43 (1.15   | 65.62 (48.61 | 51.27 (40.90 | -0.46 (-0.72 |
| 24 | North America                                                                      | (303.63 to    | (195.48 to   | to -0.89)      | to 0.83)   | to 1.05)     | to 1.72)     | to 84.95)    | to 62.35)    | to -0.20)    |
| 25 |                                                                                    | 392.66)       | 224.46)      |                |            |              |              |              |              |              |
| 26 |                                                                                    |               |              |                |            |              |              |              |              |              |
| 27 | North Africa                                                                       | 36.27 (31.06  | 48.26 (40.98 | 0.97 (0.84 to  | 0.34 (0.24 | 0.26 (0.22   | -0.86 (-0.93 | 14.36 (10.79 | 13.26 (10.60 | -0.30 (-0.34 |
| 28 | and Middle                                                                         | to 41.91)     | to 56.94)    | 1.10)          | to 0.49)   | to 0.30)     | to -0.80)    | to 18.73)    | to 16.47)    | to -0.25)    |
| 29 | East                                                                               |               |              |                |            |              |              |              |              |              |
| 30 |                                                                                    |               |              |                |            |              |              |              |              |              |
| 31 | Oceania                                                                            | 4.34 (3.51 to | 3.87 (3.16   | -0.54 (-0.72   | 0.63 (0.42 | 0.44 (0.33   | -1.41 (-1.50 | 20.60 (13.34 | 14.93 (10.45 | -1.29 (-1.38 |
| 32 |                                                                                    | 5.20)         | to 4.71)     | to -0.35)      | to 0.86)   | to 0.60)     | to -1.32)    | to 28.78)    | to 21.01)    | to -1.20)    |
| 33 |                                                                                    |               |              |                |            |              |              |              |              |              |
| 34 | South Asia                                                                         | 19.68 (15.98  | 20.11 (16.38 | 0.26 (0.10 to  | 0.69 (0.47 | 0.44 (0.33   | -1.91 (-2.07 | 21.48 (14.77 | 14.00 (10.70 | -1.68 (-1.78 |
| 35 |                                                                                    | to 24.40)     | to 24.81)    | 0.42)          | to 1.06)   | to 0.57)     | to -1.74)    | to 29.47)    | to 17.52)    | to -1.58)    |
| 36 |                                                                                    |               |              |                |            |              |              |              |              |              |
| 37 | Southeast Asia                                                                     | 4.40 (3.55 to | 6.69 (5.52   | 1.58 (1.27 to  | 0.50 (0.27 | 0.28 (0.21   | -2.36 (-2.52 | 13.16 (8.47  | 7.45 (6.06   | -2.29 (-2.44 |
| 38 |                                                                                    | 5.35)         | to 8.04)     | 1.90)          | to 0.66)   | to 0.33)     | to -2.19)    | to 15.9)     | to 8.76)     | to -2.15)    |
| 39 | Southern Latin                                                                     | 19.22 (15.96  | 20.53 (17.36 | 0.28 (0.08 to  | 0.31 (0.27 | 0.28 (0.25   | -0.46 (-0.62 | 11.10 (9.69  | 10.06 (8.61  | -0.40 (-0.50 |
| 40 | America                                                                            | to 22.60)     | to 24.24)    | 0.49)          | to 0.34)   | to 0.34)     | to -0.30)    | to 12.66)    | to 11.94)    | to -0.31)    |
| 41 |                                                                                    |               |              |                |            |              |              |              |              |              |
| 42 | Southern                                                                           |               |              |                |            |              |              |              |              |              |
| 43 | Sub-Saharan                                                                        | 10.44 (8.67   | 11.78 (9.83  | 0.53 (0.45 to  | 0.42 (0.33 | 0.44 (0.36   | 0.25 (-0.16  | 15.11 (10.88 | 13.66 (11.37 | -0.12 (-0.44 |
| 44 | Africa                                                                             | to 12.74)     | to 14.31)    | 0.61)          | to 0.53)   | to 0.51)     | to 0.65)     | to 18.87)    | to 15.90)    | to 0.20)     |
| 45 | Tropical Latin                                                                     | 65.14 (57.26  | 47.34 (41.21 | -0.87 (-1.08   | 0.47 (0.41 | 0.44 (0.40   | 0.03 (-0.14  | 23.37 (19.94 | 19.26 (16.53 | -0.44 (-0.61 |
| 46 | America                                                                            | to 74.08)     | to 54.02)    | to -0.65)      | to 0.51)   | to 0.51)     | to 0.21)     | to 27.30)    | to 22.44)    | to -0.26)    |
| 47 |                                                                                    |               |              |                |            |              |              |              |              |              |
| 48 |                                                                                    | 156.46        | 188.22       | 0.37 (0.26 to  | 0.82 (0.73 | 1.11 (0.87   | 1.51 (1.27   | 39.24 (31.18 | 46.79 (36.98 | 0.59 (0.49   |
| 49 | Western Europe                                                                     | (139.89 to    | (169.47 to   | 0.48)          | to 1.04)   | to 1.23)     | to 1.75)     | to 48.16)    | to 57.57)    | to 0.69)     |
| 50 |                                                                                    | 173.69)       | 207.48)      |                |            |              |              |              |              |              |
| 51 | Western                                                                            |               |              |                |            |              |              |              |              |              |
| 52 | Sub-Saharan                                                                        | 8.49 (7.03 to | 10.09 (8.38  | 0.78 (0.66 to  | 0.56 (0.33 | 0.5 (0.35 to | -0.37 (-0.46 | 19.69 (11.64 | 16.77 (11.61 | -0.57 (-0.66 |
| 53 | Africa                                                                             | 10.33)        | to 12.23)    | 0.90)          | to 0.91)   | 0.67)        | to -0.28)    | to 30.47)    | to 22.73)    | to -0.48)    |
| 54 |                                                                                    |               |              |                |            |              |              |              |              |              |
| 55 | Abbreviations: CI, confidence interval; DALY, disability adjusted life year; EAPC, |               |              |                |            |              |              |              |              |              |
| 56 | estimated annual percentage change; GBD, Global Burden of Disease; SDI,            |               |              |                |            |              |              |              |              |              |
| 57 | Socio-demographic Index; UI, uncertainty interval.                                 |               |              |                |            |              |              |              |              |              |
| 58 |                                                                                    |               |              |                |            |              |              |              |              |              |
| 59 |                                                                                    |               |              |                |            |              |              |              |              |              |
| 60 |                                                                                    |               |              |                |            |              |              |              |              |              |

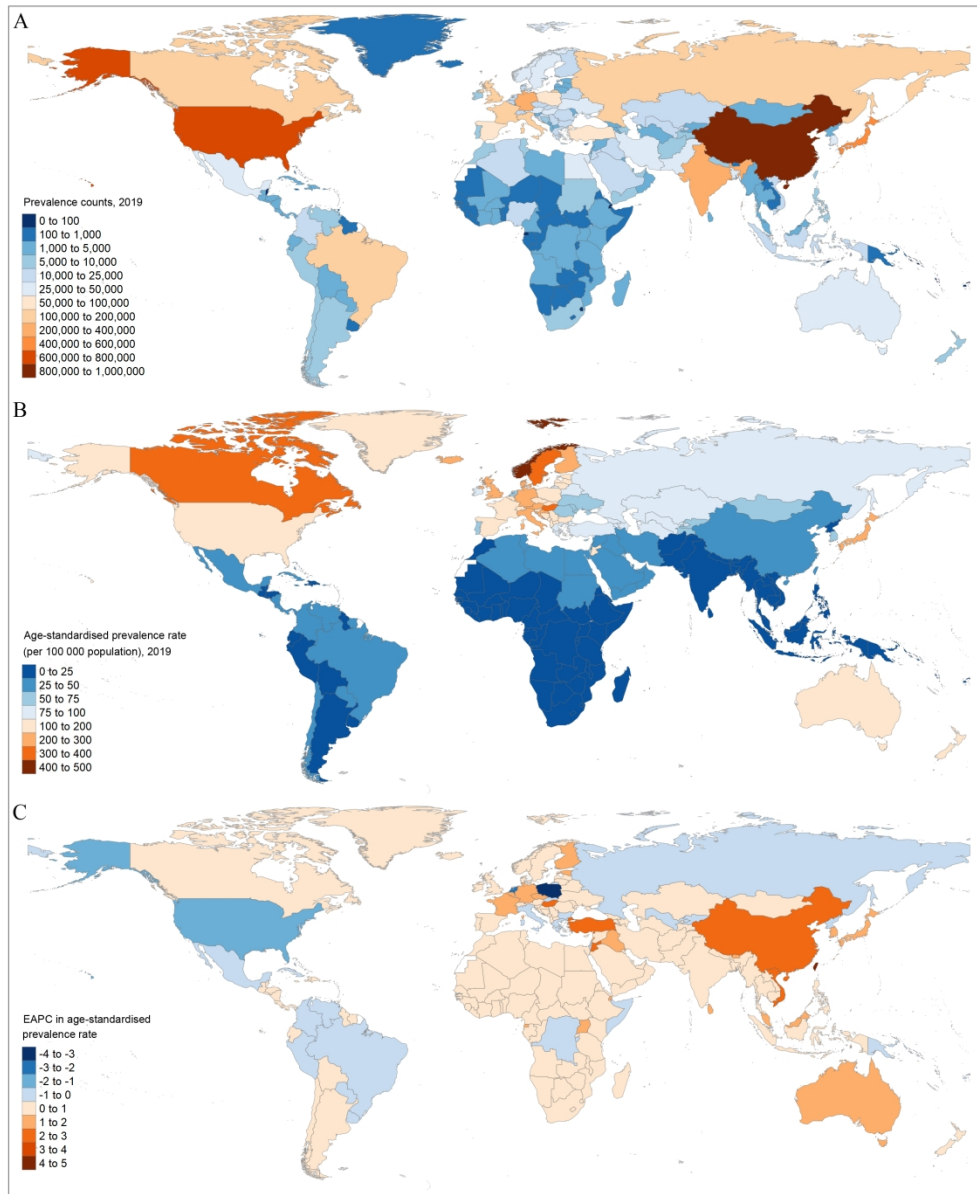

Figure 1. The global prevalence burden of IBD in 204 countries and territories. (A) The absolute number of IBD prevalent cases in 2017. (B) The age-standardised prevalence rate (per 100 000 population) of IBD in 2017. (C) The EAPC of age-standardised prevalence rate for IBD between 1990 and 2019. EAPC=estimated annual percentage change. IBD=inflammatory bowel disease.

128x156mm (600 x 600 DPI)

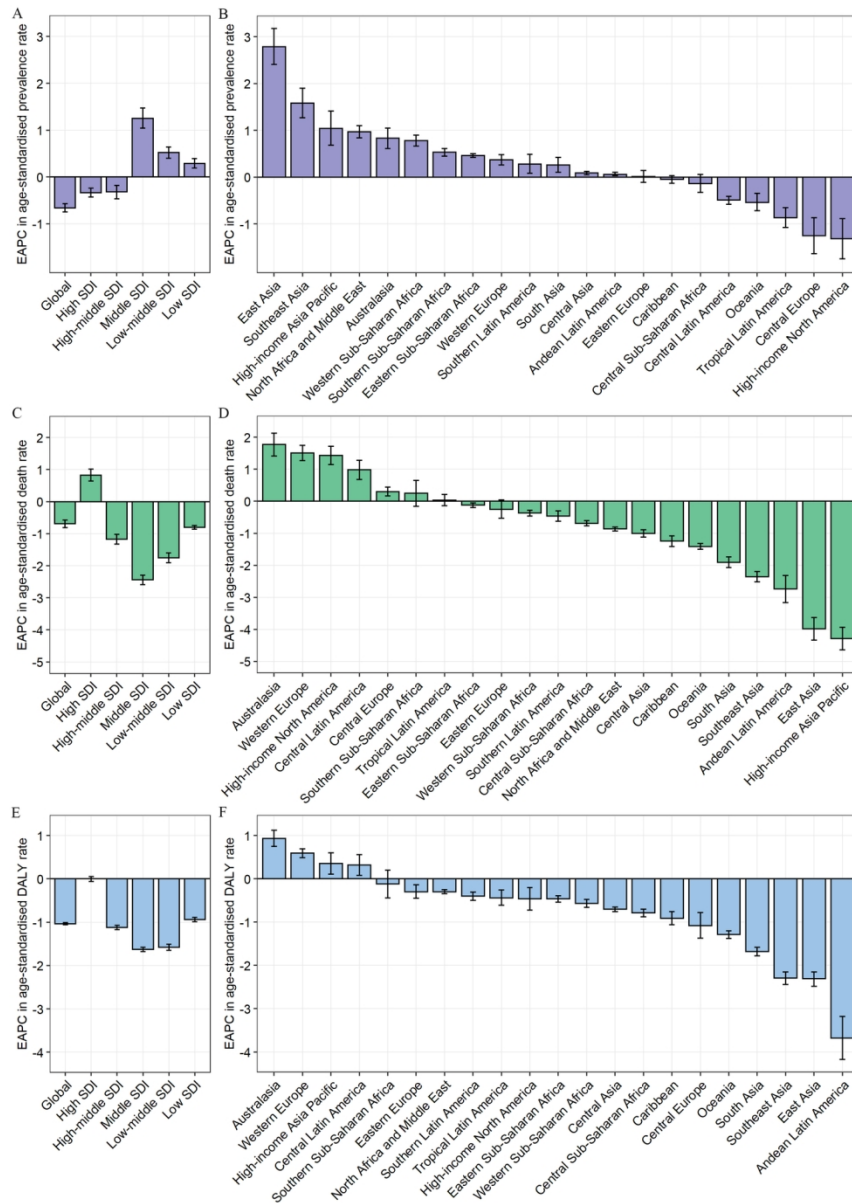

Figure 2. The EAPCs in age-standardised rates of prevalence (A, B), deaths (C, D), and DALYs (E, F) due to IBD from 1990 to 2019, both sexes, by GBD region, and by SDI quintile. DALYs=disability adjusted life years. EAPC=estimated annual percentage change. GBD=Global Burden of Disease. IBD=inflammatory bowel disease. SDI=Socio-demographic Index.

119x166mm (300 x 300 DPI)

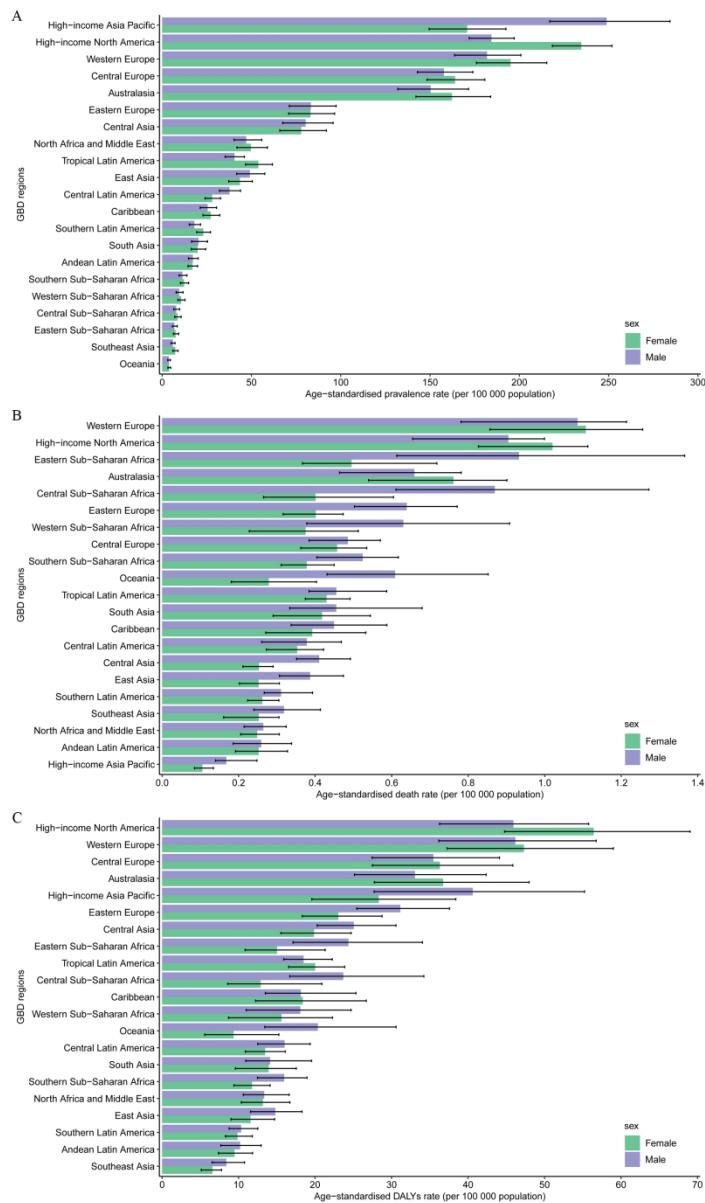

Figure 3. The age-standardised rates of prevalence (A), deaths (B), and DALYs (C) due to IBD by sex, across 21 regions, in 2019. Error bars indicate the 95% uncertainty interval (UI) for the age-standardised rates. DALYs=disability adjusted life years. IBD=inflammatory bowel disease.

82x141mm (600 x 600 DPI)

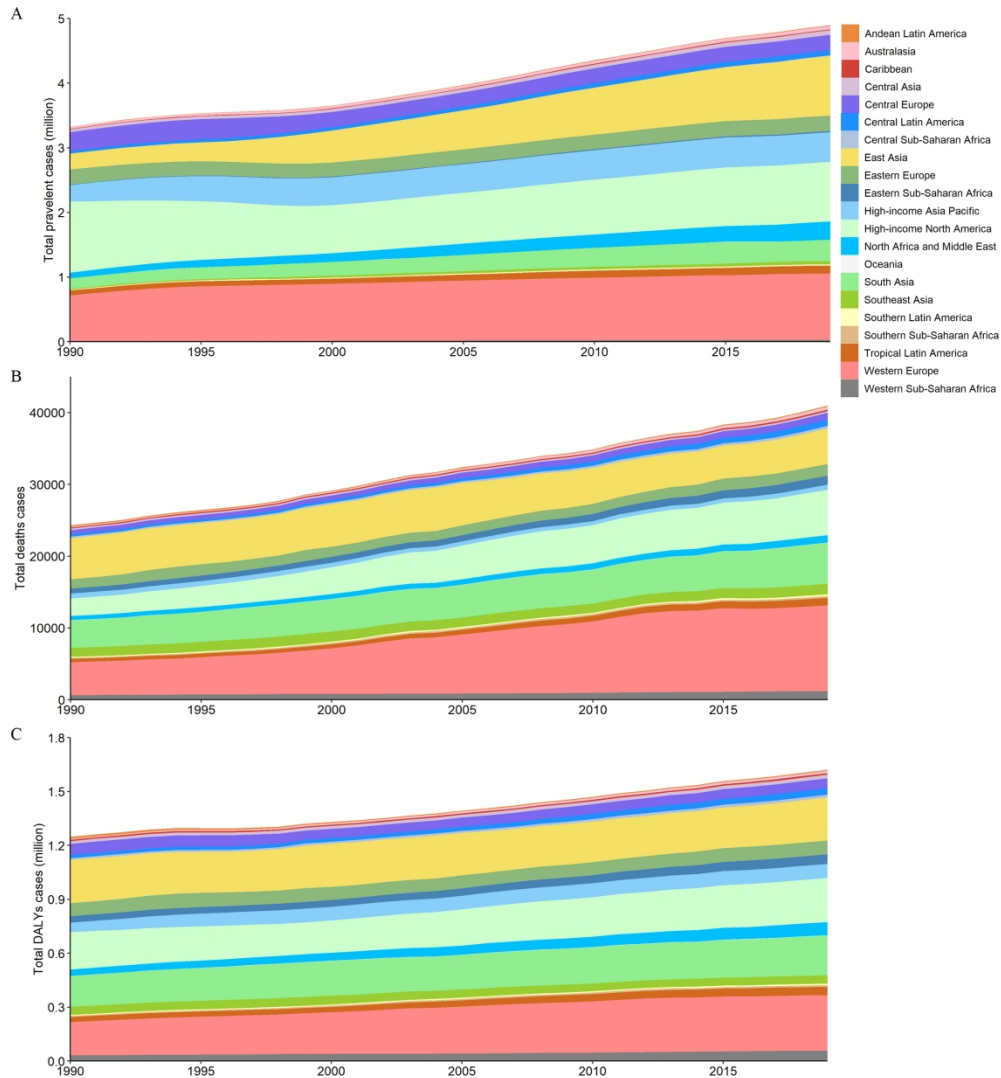

Figure 4. The absolute number of prevalent cases (A), deaths (B), and DALYs (C) due to IBD for all GBD regions from 1990 to 2019.

DALYs=disability adjusted life years. GBD=Global Burden of Disease. IBD=inflammatory bowel disease.

104x113mm (600 x 600 DPI)



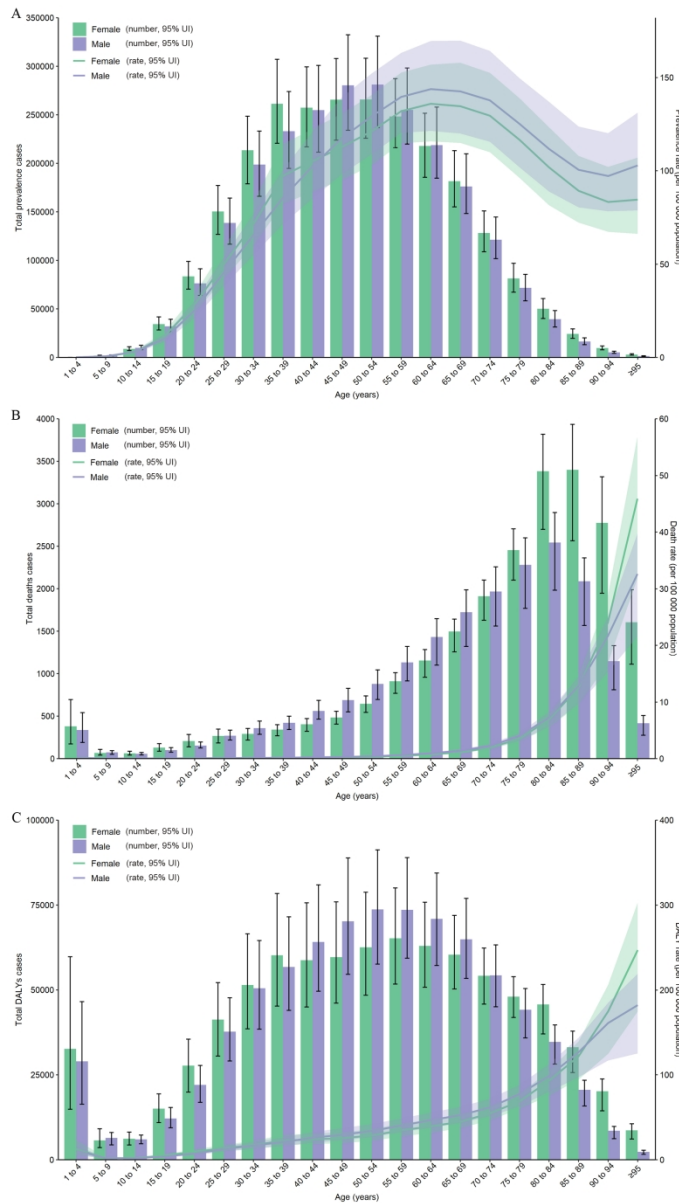

Figure 5. Age patterns by sex of the total number and age-standardised rates of prevalent cases (A), deaths (B), and DALYs (C) due to IBD at the global level in 2019. Error bars indicate the 95% uncertainty interval (UI) for the number of cases. Shading indicates the 95% UI for the rates. DALYs=disability adjusted life years. IBD=inflammatory bowel disease.

84x148mm (600 x 600 DPI)

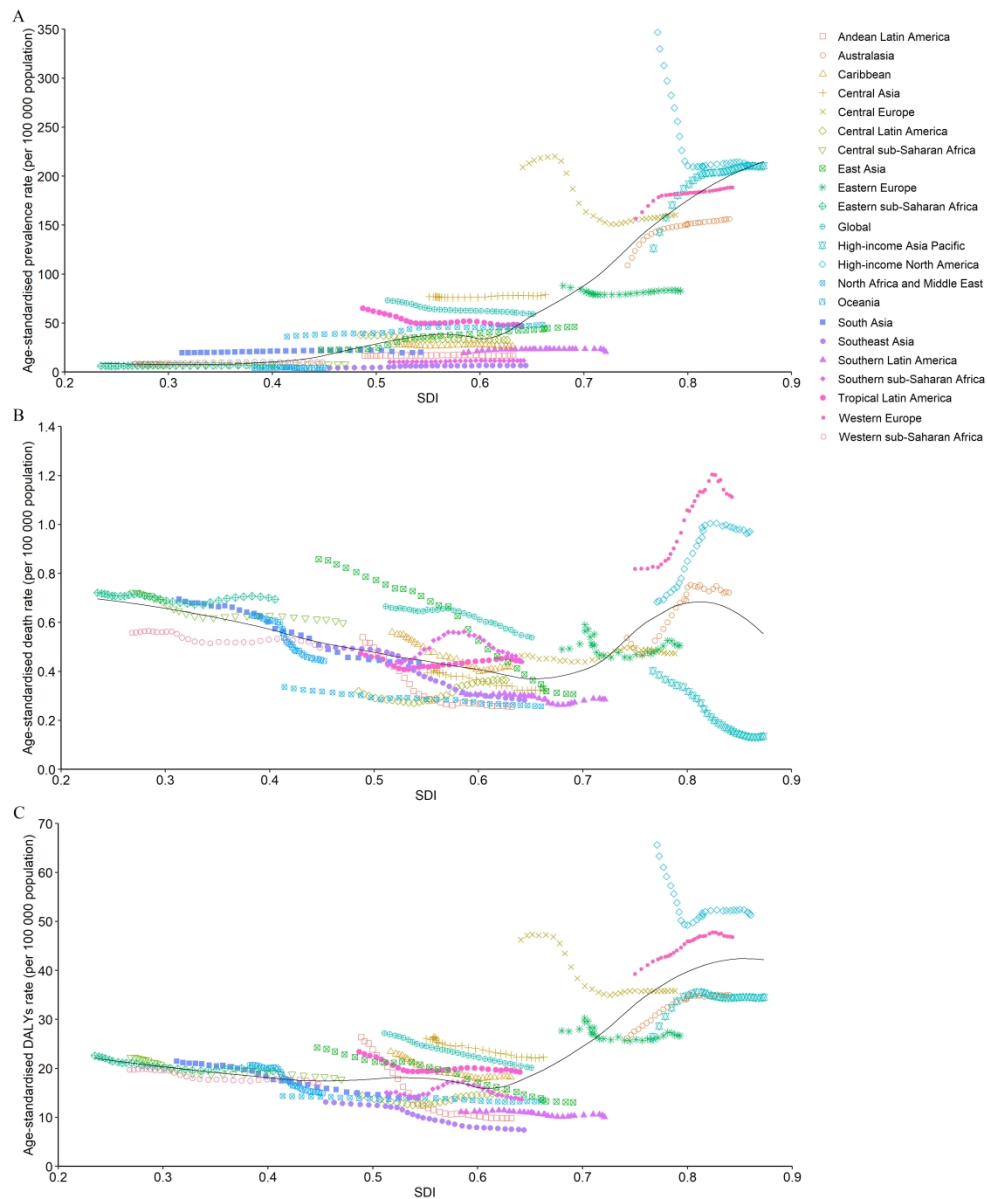

Figure 6. The age-standardised rates of IBD prevalence (A), deaths (B), and DALYs globally and for 21 GBD regions by SDI from 1990 to 2019.

The expected age-standardised rates in 2019 based solely on SDI were represented by the black line. For each region, points from left to right depict estimates from each year from 1990 to 2019. DALYs=disability adjusted life years. GBD=Global Burden of Disease. IBD=inflammatory bowel disease. SDI=Socio-demographic Index.

159x194mm (600 x 600 DPI)

1  
2  
3 Supplement to: **The global, regional and national burden of inflammatory bowel**  
4 **disease in 204 countries and territories from 1990 to 2019, based on Global**  
5 **Burden Disease Study 2019**  
6  
7

8 **Contents:**  
9

10 **Supplementary Figures**  
11

12  
13  
14 Supplementary Figure 1: Trends from 1990 to 2019 in number and age-standardised  
15 prevalence rate of IBD at the global level.  
16

17  
18 Supplementary Figure 2: The absolute number of deaths due to IBD for 204 countries  
19 and territories in 2019.  
20

21  
22 Supplementary Figure 3: The age-standardised death rate (per 100 000 population) of  
23 IBD for 204 countries and territories in 2019.  
24

25  
26 Supplementary Figure 4: The EAPC of age-standardised death rate for IBD in 204  
27 countries and territories between 1990 and 2019.  
28

29  
30 Supplementary Figure 5: Trends from 1990 to 2019 in number and age-standardised  
31 death rate of IBD at the global level.  
32

33  
34 Supplementary Figure 6: The absolute number of DALYs due to IBD for 204  
35 countries and territories in 2019.  
36

37  
38 Supplementary Figure 7: The absolute number of incident cases due to IBD for 204  
39 countries and territories in 2019.  
40

41  
42 Supplementary Figure 8: The absolute number of YLLs due to IBD for 204 countries  
43 and territories in 2019.  
44

45  
46 Supplementary Figure 9: The absolute number of YLDs due to IBD for 204 countries  
47 and territories in 2019.  
48

49  
50 Supplementary Figure 10: The age-standardised DALY rate (per 100 000 population)  
51 of IBD for 204 countries and territories in 2019.  
52

53  
54 Supplementary Figure 11: The EAPC of age-standardised DALY rate for IBD in 204  
55 countries and territories between 1990 and 2019.  
56

57  
58 Supplementary Figure 12: The EAPC of age-standardised incidence rate for IBD in  
59 204 countries and territories between 1990 and 2019.  
60

1  
2  
3 Supplementary Figure 13: The EAPC of age-standardised YLL rate for IBD in 204  
4 countries and territories between 1990 and 2019.  
5

6  
7 Supplementary Figure 14: The EAPC of age-standardised YLD rate for IBD in 204  
8 countries and territories between 1990 and 2019.  
9

10  
11 Supplementary Figure 15: Global counts and age-specific rates of YLLs and YLDs  
12 due to IBD across age group in 2019.  
13

14  
15 Supplementary Figure 16: Trends from 1990 to 2019 in number and age-standardised  
16 DALY rate of IBD at the global level.  
17

### 18 19 **Supplementary Tables**

20  
21 Supplementary Table 1: Prevalent cases, deaths and disability adjusted life years  
22 (DALYs) of inflammatory bower disease (IBD) in 1990 and 2019 and their  
23 percentage change from 1990 to 2019  
24

25  
26 Supplementary Table 2: Prevalent cases, deaths and disability adjusted life years  
27 (DALYs) for inflammatory bower disease (IBD) by 204 countries or territories in  
28 2019 and 2019, and their percentage change from 1990 to 2019.  
29

30  
31 Supplementary Table 3: Age-standardised prevalence, death and DALY rates for  
32 inflammatory bower disease (IBD) by 204 countries or territories in 1990 and 2019,  
33 and their temporal trends from 1990 to 2019.  
34

35  
36 Supplementary Table 4: Incident cases, YLLs and YLDs of inflammatory bower  
37 disease (IBD) in 1990 and 2019 and their percentage change from 1990 to 2019.  
38

39  
40 Supplementary Table 5: Age-standardised incidence, YLL and YLD rates for  
41 inflammatory bower disease (IBD) in 1990 and 2019 and their temporal trends from  
42 1990 to 2019.  
43  
44  
45  
46  
47  
48  
49  
50  
51  
52  
53  
54  
55  
56  
57  
58  
59  
60

**Supplementary Figure 1.** Trends from 1990 to 2019 in number and age-standardised prevalence rate of IBD at the global level.

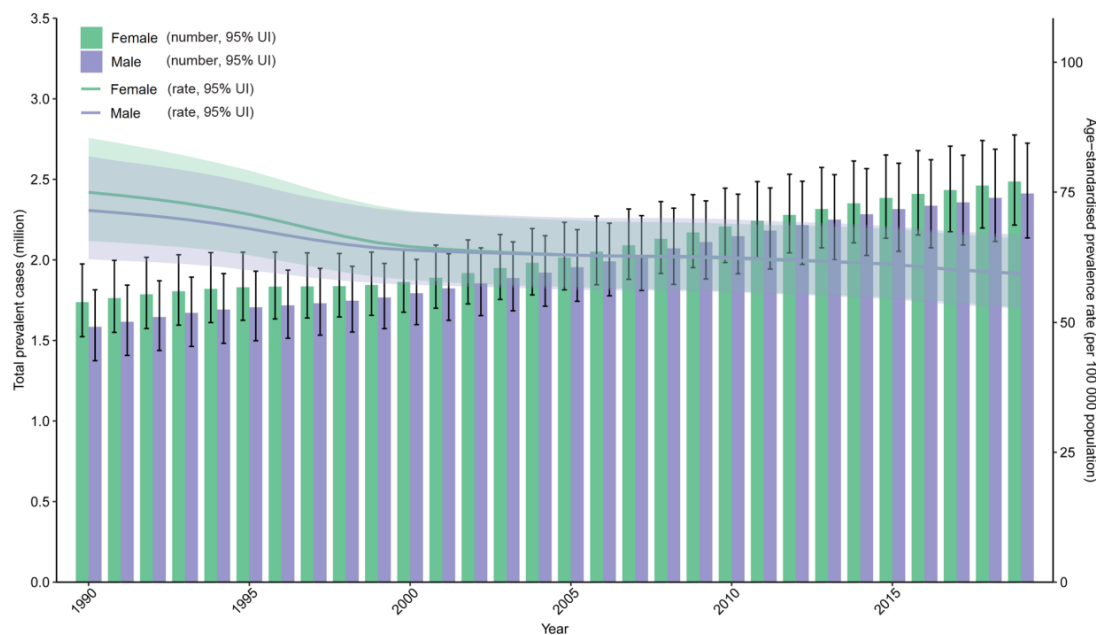

Error bars indicate the 95% uncertainty interval (UI) for number of prevalent cases. Shading indicates the 95% UI for the age-standardised prevalence rate. IBD, inflammatory bowel disease.

**Supplementary Figure 2.** The absolute number of deaths due to IBD for 204 countries and territories in 2019.

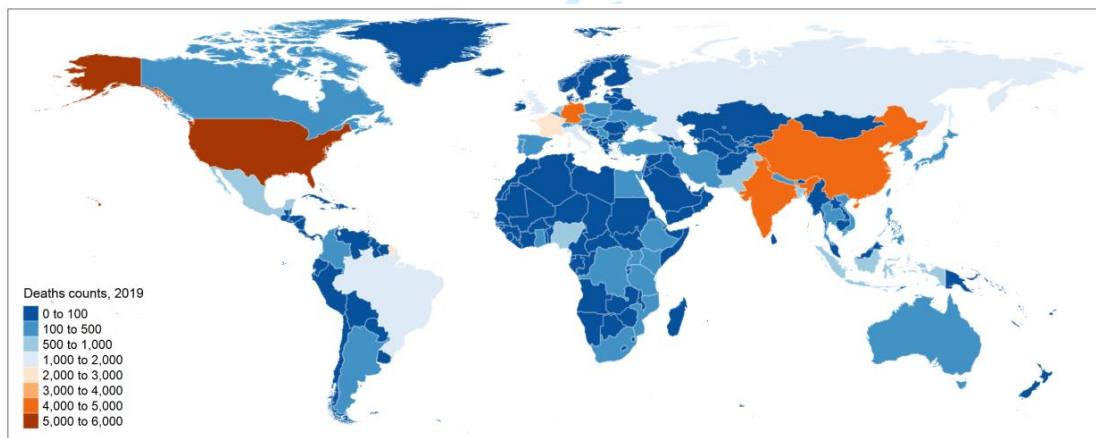

IBD, inflammatory bowel disease.

**Supplementary Figure 3.** The age-standardised death rate (per 100 000 population) of IBD for 204 countries and territories in 2019.

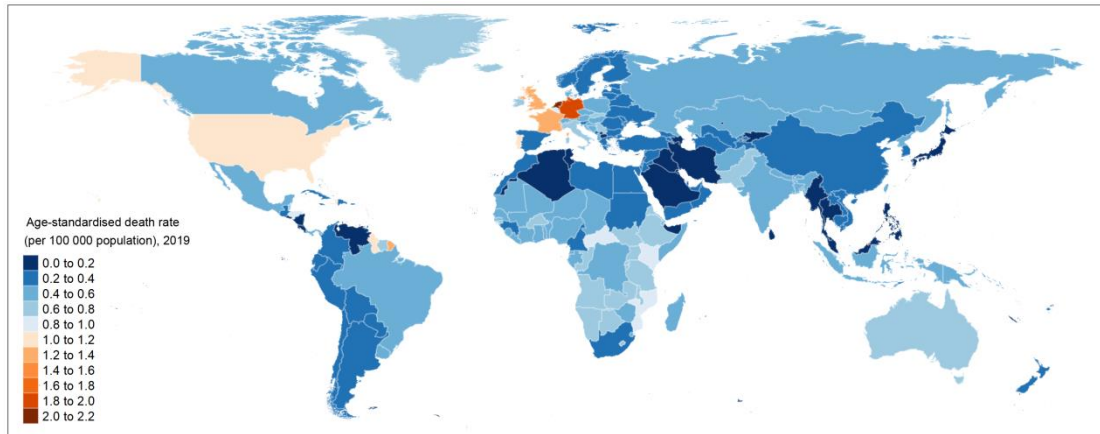

IBD, inflammatory bowel disease.

**Supplementary Figure 4.** The EAPC of age-standardised death rate for IBD in 204 countries and territories between 1990 and 2019.

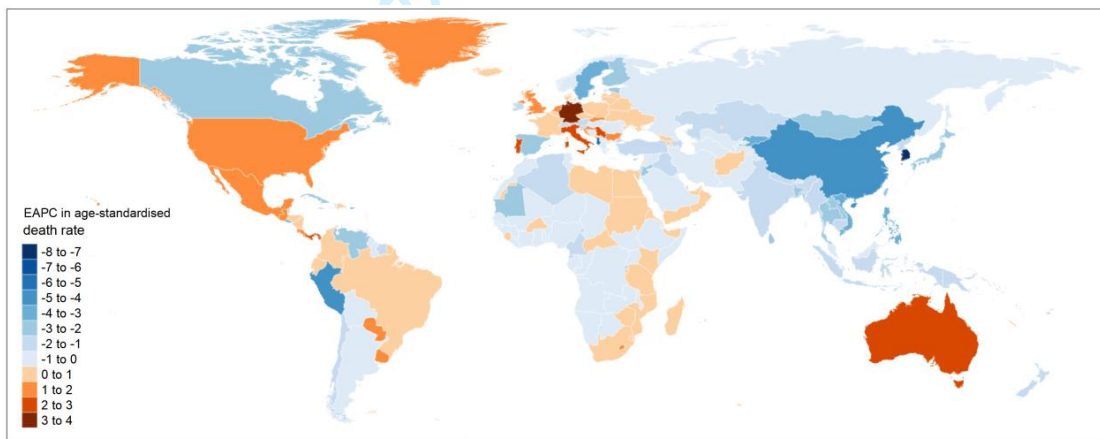

EAPC, estimated annual percentage change; IBD, inflammatory bowel disease.

**Supplementary Figure 5.** Trends from 1990 to 2019 in number and age-standardised death rate of IBD at the global level.

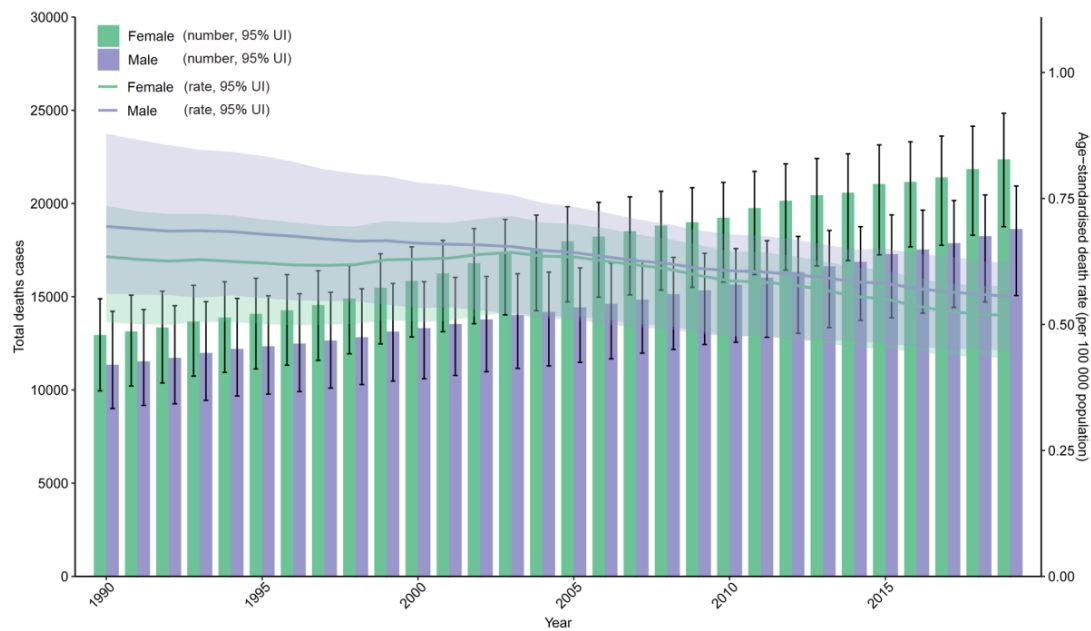

Error bars indicate the 95% uncertainty interval (UI) for number of death cases. Shading indicates the 95% UI for the age-standardised death rate. IBD, inflammatory bowel disease.

**Supplementary Figure 6.** The absolute number of DALYs due to IBD for 204 countries and territories in 2019.

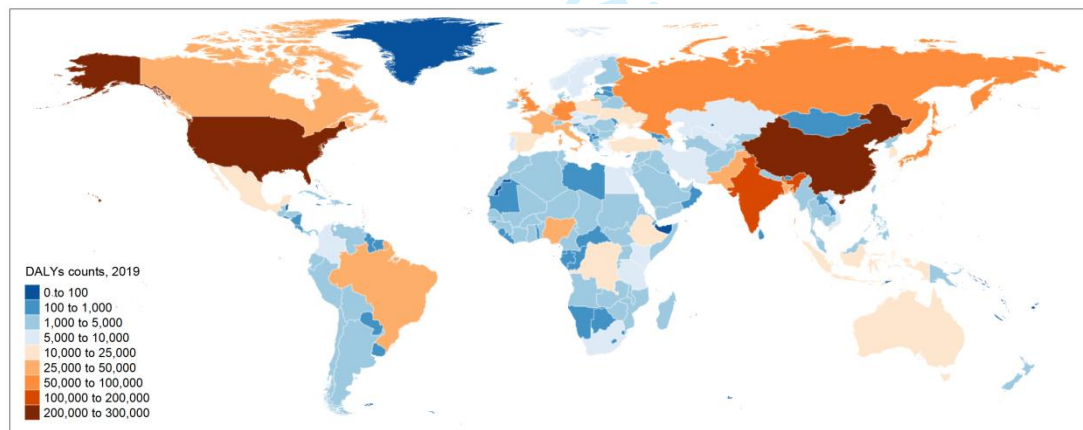

DALYs, disability adjusted life years; IBD, inflammatory bowel disease.



1  
2  
3 **Supplementary Figure 7.** The absolute number of incident cases due to IBD for 204  
4 countries and territories in 2019.  
5

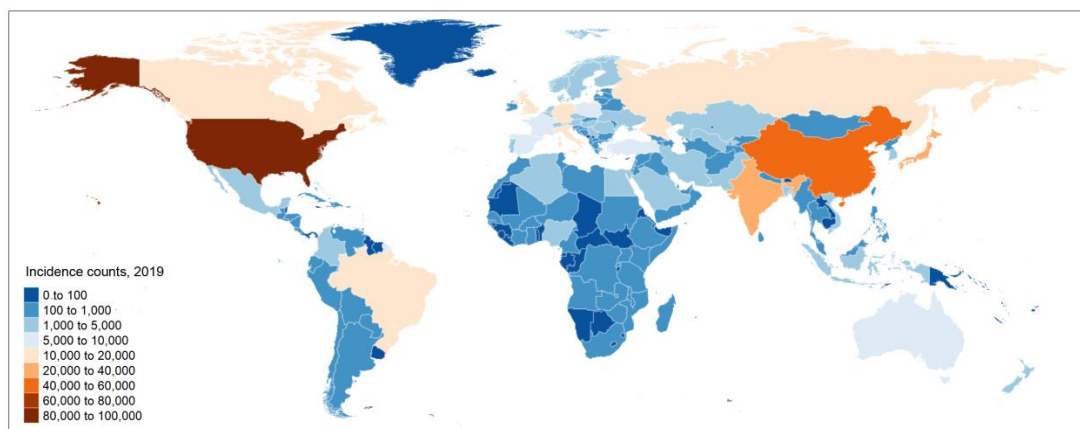

20 IBD, inflammatory bowel disease.  
21

22  
23 **Supplementary Figure 8.** The absolute number of YLLs due to IBD for 204  
24 countries and territories in 2019.  
25

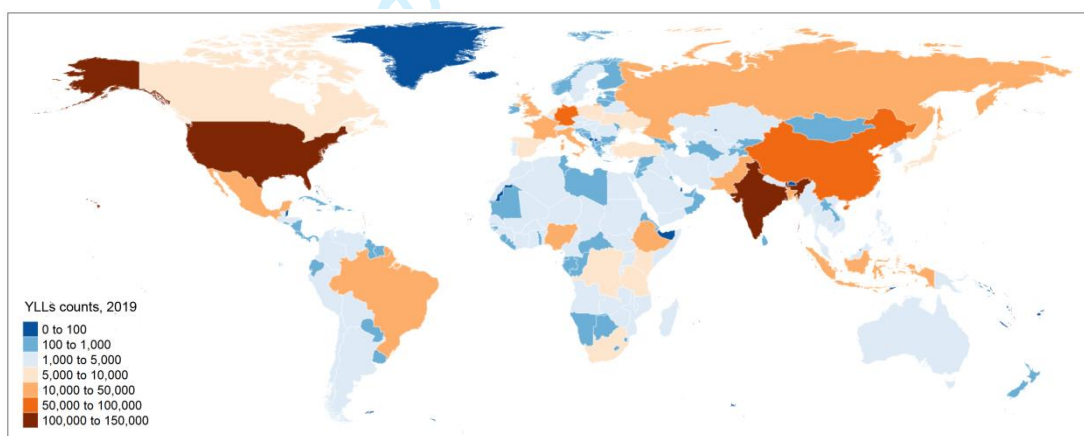

40 IBD, inflammatory bowel disease; YLLs, years of life lost.  
41

42  
43 **Supplementary Figure 9.** The absolute number of YLDs due to IBD for 204  
44 countries and territories in 2019.  
45

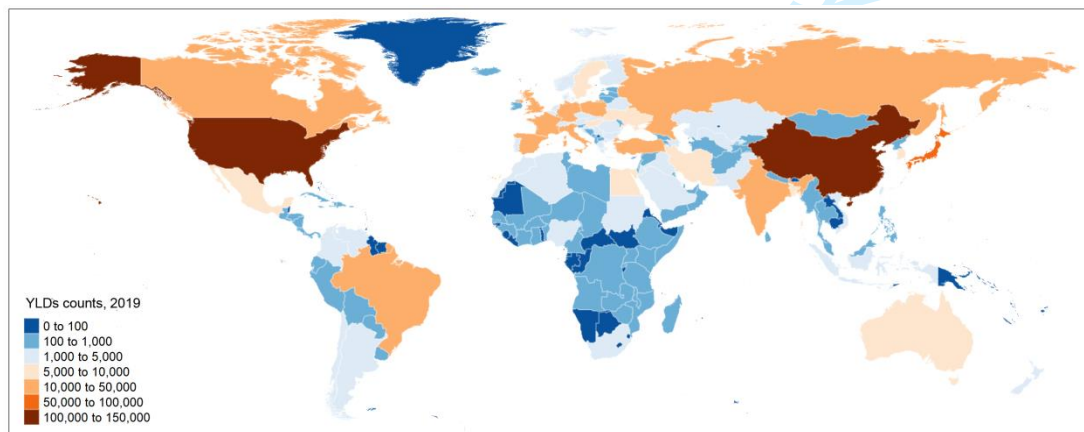

IBD, inflammatory bowel disease; YLDs, years of life lived with disability.

**Supplementary Figure 10.** The age-standardised DALY rate (per 100 000 population) of IBD for 204 countries and territories in 2019.

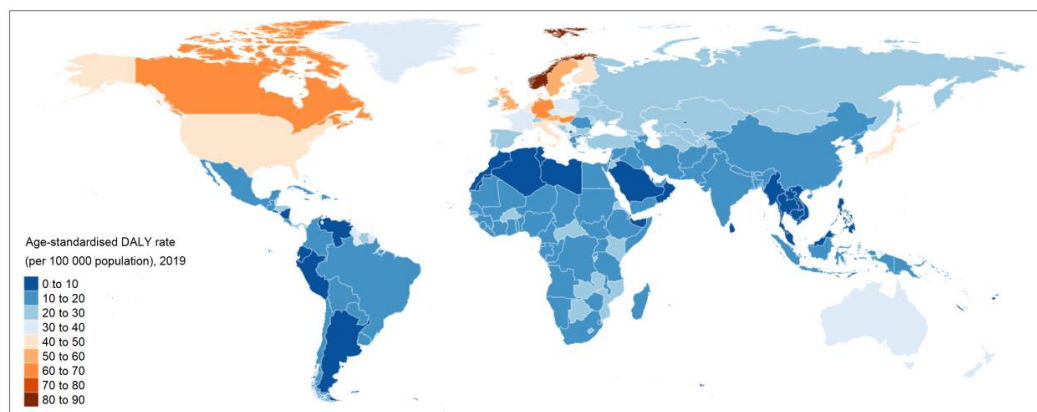

DALY, disability adjusted life year; IBD, inflammatory bowel disease.

**Supplementary Figure 11.** The EAPC of age-standardised DALY rate for IBD in 204 countries and territories between 1990 and 2019.

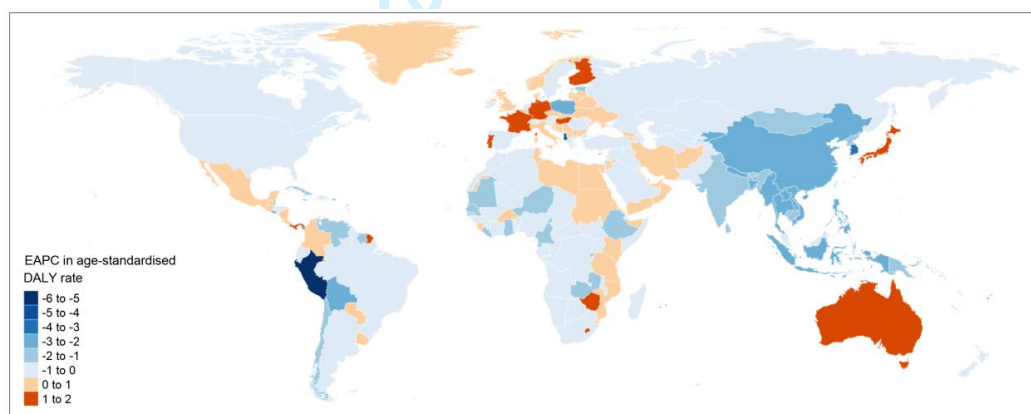

DALY, disability adjusted life year; EAPC, estimated annual percentage change; IBD, inflammatory bowel disease.

**Supplementary Figure 12.** The EAPC of age-standardised incidence rate for IBD in 204 countries and territories between 1990 and 2019.

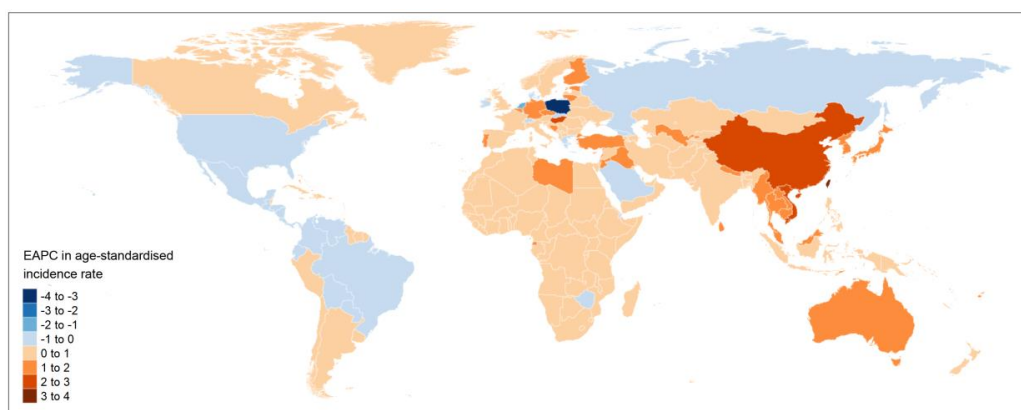

EAPC, estimated annual percentage change; IBD, inflammatory bowel disease.

**Supplementary Figure 13.** The EAPC of age-standardised YLL rate for IBD in 204 countries and territories between 1990 and 2019.

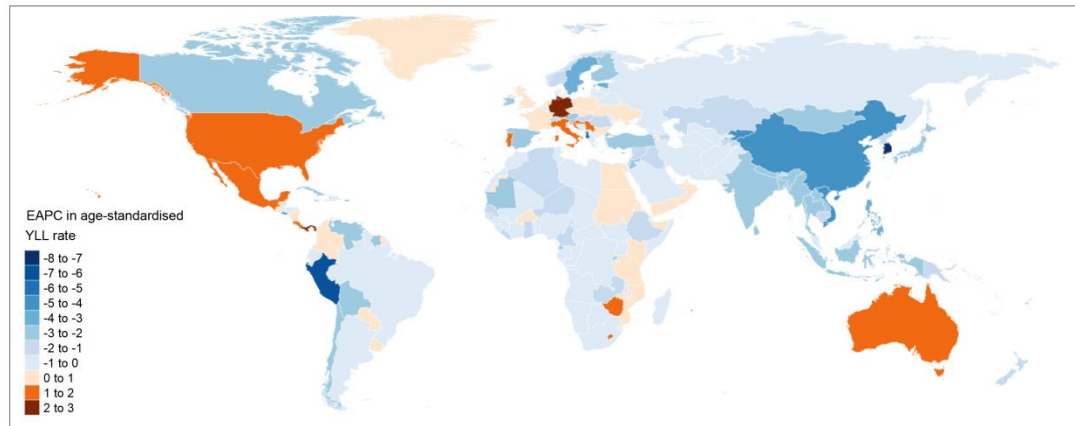

EAPC, estimated annual percentage change; IBD, inflammatory bowel disease; YLL, years of life lost.

**Supplementary Figure 14.** The EAPC of age-standardised YLD rate for IBD in 204 countries and territories between 1990 and 2019.

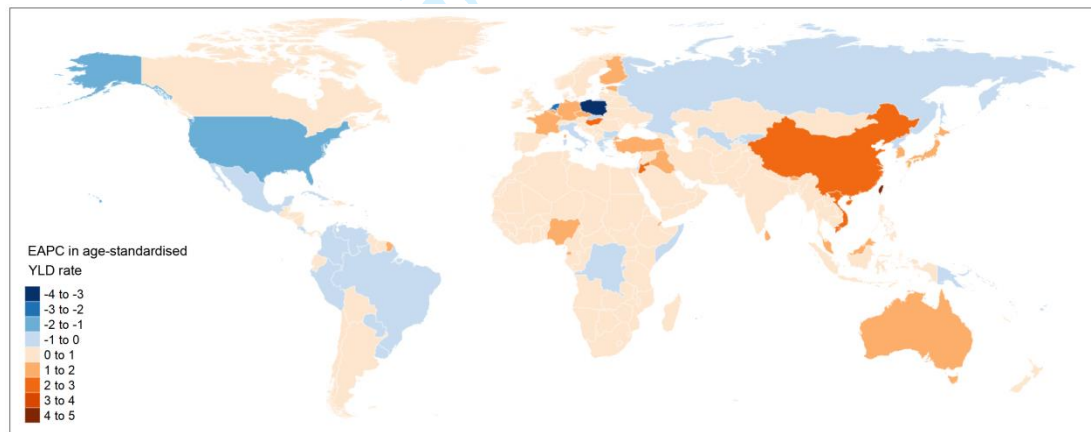

EAPC, estimated annual percentage change; IBD, inflammatory bowel disease; YLD, years of life lived with disability.

**Supplementary Figure 15.** Global counts and age-specific rates of YLLs and YLDs due to IBD across age group in 2019.

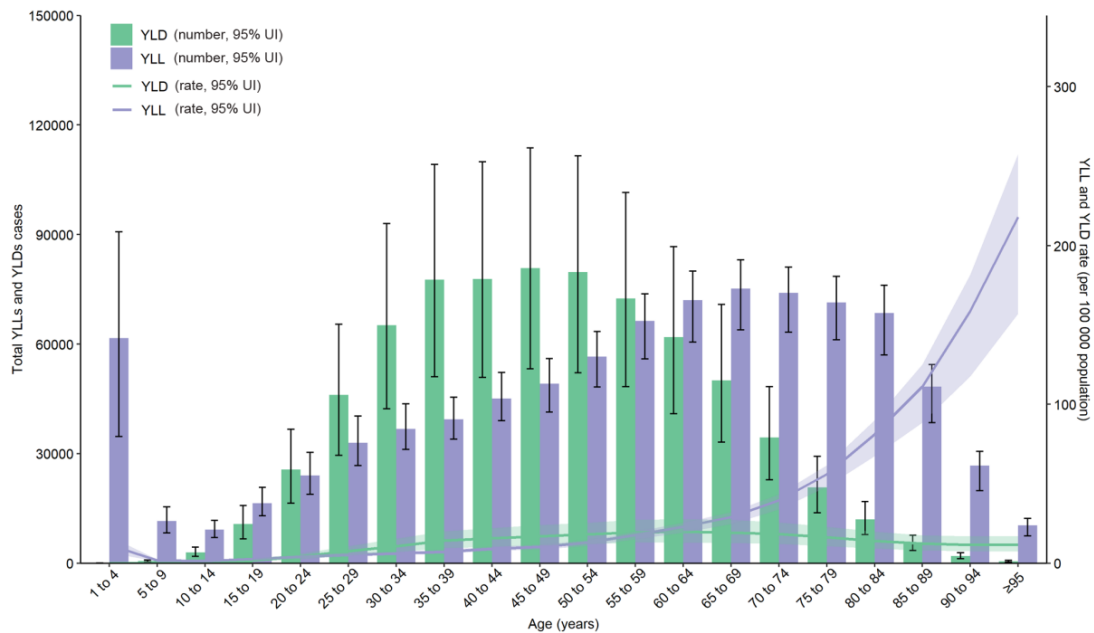

Error bars indicate the 95% uncertainty interval (UI) for YLLs and YLDs. Shading indicates the 95% UI for the rates. IBD, inflammatory bowel disease; YLDs, years of life lived with disability; YLLs, years of life lost.

**Supplementary Figure 16.** Trends from 1990 to 2019 in number and age-standardised DALY rate of IBD at the global level.

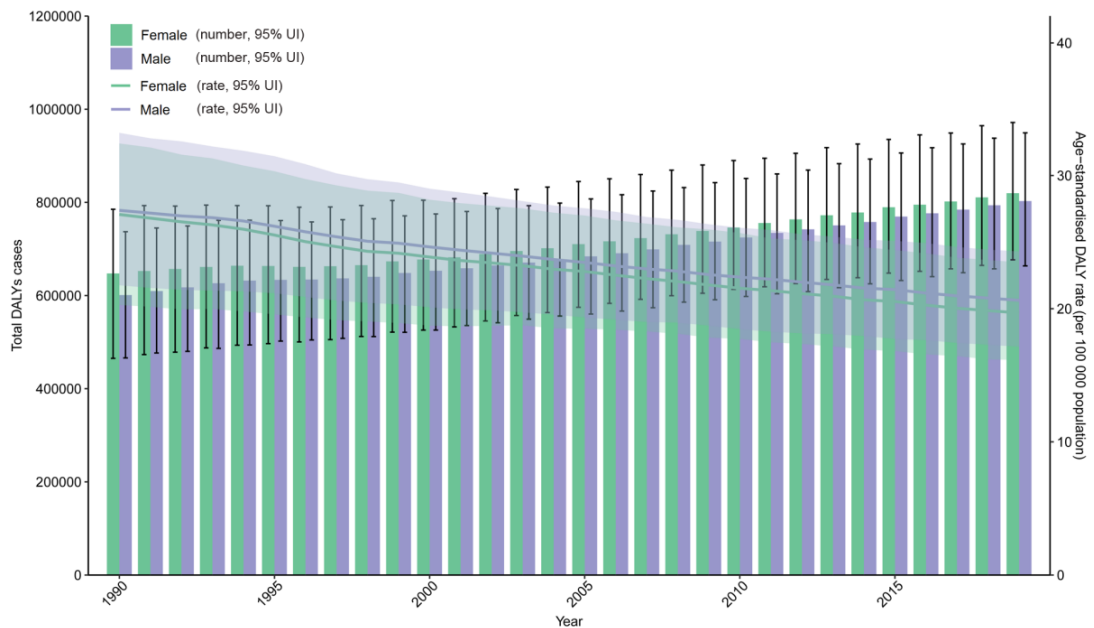

Error bars indicate the 95% uncertainty interval (UI) for number of DALYs cases. Shading indicates the 95% UI for the age-standardised DALY rate. DALY, disability adjusted life year; IBD, inflammatory bowel disease.

**Supplementary Table 1** Prevalent cases, deaths and disability adjusted life years (DALYs) of inflammatory bowel disease (IBD) in 1990 and 2019 and their percentage change from 1990 to 2019

| Characteristics         | Prevalent cases                       |                                    |                                     | Deaths                       |                              |                                     | DALYs                             |                                    |                                     |
|-------------------------|---------------------------------------|------------------------------------|-------------------------------------|------------------------------|------------------------------|-------------------------------------|-----------------------------------|------------------------------------|-------------------------------------|
|                         | 1990 No.<br>(95%UI)                   | 2019 No.<br>(95%UI)                | Percentage<br>change (%)<br>(95%UI) | 1990 No.<br>(95%UI)          | 2019 No.<br>(95%UI)          | Percentage<br>change (%)<br>(95%UI) | 1990 No.<br>(95%UI)               | 2019 No.<br>(95%UI)                | Percentage<br>change (%)<br>(95%UI) |
| Global                  | 3322132<br>(2903627<br>to<br>3790430) | 4898558<br>(4353233 to<br>5499296) | 47.45 (43.76<br>to 51.43)           | 24295<br>(20258 to<br>28376) | 40998<br>(34933 to<br>44661) | 68.75 (47.12<br>to 94.62)           | 1248275<br>(963014 to<br>1503174) | 1622498<br>(1356296 to<br>1915042) | 29.98 (14.83<br>to 50.21)           |
| Sex                     |                                       |                                    |                                     |                              |                              |                                     |                                   |                                    |                                     |
| Male                    | 1584462<br>(1374414<br>to<br>1814399) | 2411840<br>(2136219 to<br>2724369) | 52.22 (48.47<br>to 56.34)           | 11347 (9002<br>to 14218)     | 18633<br>(15060 to<br>20938) | 64.21 (37.52<br>to 90.74)           | 600963<br>(466033 to<br>736983)   | 802748<br>(663563 to<br>949342)    | 33.58 (15.75<br>to 53.92)           |
| Female                  | 1737670<br>(1523309<br>to<br>1974864) | 2486718<br>(2216240 to<br>2775262) | 43.11 (39.03<br>to 47.31)           | 12947<br>(9953 to<br>14888)  | 22365<br>(18759 to<br>24838) | 72.74 (47.65<br>to 115.99)          | 647311<br>(465166 to<br>785221)   | 819751<br>(676700 to<br>971584)    | 26.64 (10.70<br>to 54.99)           |
| SDI quintile            |                                       |                                    |                                     |                              |                              |                                     |                                   |                                    |                                     |
| High                    | 1883348<br>(1654416<br>to<br>2128434) | 2283717<br>(2079286 to<br>2493360) | 21.26 (15.68<br>to 27.38)           | 7386 (6656<br>to 8731)       | 17801<br>(14215 to<br>19552) | 141.02<br>(73.28 to<br>161.46)      | 415485<br>(323781 to<br>520634)   | 603330<br>(489511 to<br>729627)    | 45.21 (26.78<br>to 56.21)           |
| High-middle             | 942961<br>(817123 to<br>1086707)      | 1362491<br>(1206918 to<br>1538822) | 44.49 (40.70<br>to 48.74)           | 5045 (4476<br>to 5782)       | 7272 (6519<br>to 8110)       | 44.13 (24.31<br>to 65.11)           | 288336<br>(236216 to<br>344578)   | 352794<br>(285252 to<br>432623)    | 22.36 (12.11<br>to 32.44)           |
| Middle                  | 301457<br>(252149 to<br>355140)       | 818871<br>(688348 to<br>968484)    | 171.64<br>(163.13 to<br>181.21)     | 5425 (4146<br>to 6768)       | 6598 (5602<br>to 7341)       | 21.61 (-2.11<br>to 58.92)           | 248139<br>(184995 to<br>297495)   | 291088<br>(240412 to<br>345833)    | 17.31 (-3.67<br>to 60.14)           |
| Low-middle              | 152118<br>(124851 to<br>184061)       | 335789<br>(278324 to<br>403122)    | 120.74<br>(115.27 to<br>126.61)     | 4533 (3018<br>to 6152)       | 6180 (4994<br>to 7392)       | 36.34 (9.54<br>to 81.14)            | 203020<br>(126472 to<br>268417)   | 236584<br>(189248 to<br>283804)    | 16.53 (-9.40<br>to 65.68)           |
| Low                     | 41264<br>(33866 to<br>50406)          | 95941<br>(78454 to<br>116802)      | 132.51<br>(127.59 to<br>136.94)     | 1893 (1144<br>to 2626)       | 3125 (2442<br>to 4016)       | 65.06 (21.70<br>to 141.90)          | 92718<br>(45634 to<br>147570)     | 137867<br>(100264 to<br>180825)    | 48.69 (1.39<br>to 148.81)           |
| GBD region              |                                       |                                    |                                     |                              |                              |                                     |                                   |                                    |                                     |
| Andean Latin<br>America | 4294 (3643<br>to 5026)                | 10380<br>(8875 to<br>12027)        | 141.73<br>(131.47 to<br>153.82)     | 168 (99 to<br>249)           | 144 (111 to<br>182)          | -14.37<br>(-45.71 to<br>56.11)      | 10768<br>(5527 to<br>17349)       | 5942 (4666<br>to 7395)             | -44.82<br>(-67.80 to<br>12.24)      |
| Australasia             | 24135<br>(20445 to<br>28083)          | 53225<br>(47167 to<br>59881)       | 120.53<br>(104.13 to<br>137.71)     | 117 (103 to<br>139)          | 400 (291 to<br>465)          | 241.68<br>(120.09 to<br>298.29)     | 5802 (4531<br>to 7299)            | 13328<br>(10488 to<br>16560)       | 129.69<br>(92.95 to<br>151.94)      |



|    |                              |                           |                           |                           |                     |                     |                         |                      |                      |                          |
|----|------------------------------|---------------------------|---------------------------|---------------------------|---------------------|---------------------|-------------------------|----------------------|----------------------|--------------------------|
| 1  |                              |                           |                           |                           |                     |                     |                         |                      |                      |                          |
| 2  |                              |                           |                           |                           |                     |                     |                         |                      |                      |                          |
| 3  |                              |                           |                           |                           |                     |                     |                         |                      |                      |                          |
| 4  |                              | 13360                     |                           |                           |                     |                     |                         |                      |                      | 19.44                    |
| 5  | Caribbean                    | 8194 (7012 to 9634)       | (11262 to 15892)          | 63.04 (55.79 to 71.54)    | 157 (118 to 208)    | 210 (156 to 264)    | 33.66 (3.39 to 70.80)   | 7451 (5008 to 11792) | 8900 (6523 to 11709) | (-16.93 to 53.06)        |
| 6  |                              | 42100                     | 72034                     |                           |                     |                     |                         | 15952                | 20237                |                          |
| 7  |                              |                           |                           |                           |                     |                     |                         |                      |                      |                          |
| 8  | Central Asia                 | (35493 to 49944)          | (60489 to 86073)          | 71.10 (65.37 to 77.74)    | 215 (167 to 251)    | 249 (218 to 288)    | 15.70 (-1.33 to 47.63)  | (12800 to 19230)     | (16357 to 24806)     | 26.86 (10.10 to 46.33)   |
| 9  |                              | 290304                    | 236196                    | -18.64                    |                     |                     |                         | 61546                | 54694                | -11.13                   |
| 10 |                              |                           |                           |                           |                     |                     |                         |                      |                      |                          |
| 11 | Central Europe               | (249715 to 338920)        | (214732 to 259804)        | (-24.57 to -11.98)        | 604 (563 to 696)    | 958 (799 to 1104)   | 58.66 (24.18 to 83.87)  | (47417 to 77414)     | (42729 to 67570)     | (-18.70 to -3.30)        |
| 12 |                              | 40471                     | 81606                     | 101.64                    |                     |                     |                         | 183.85               | 18096                | 36178                    |
| 13 | Central Latin America        | (34451 to 47294)          | (69904 to 95542)          | (96.51 to 107.43)         | 301 (270 to 330)    | 854 (702 to 997)    | (135.53 to 232.71)      | (15456 to 20849)     | (30219 to 43014)     | 99.92 (74.40 to 127.28)  |
| 14 |                              |                           |                           |                           |                     |                     |                         |                      |                      |                          |
| 15 | Central Sub-Saharan Africa   | 2781 (2267 to 3400)       | 7015 (5690 to 8639)       | 152.29 (138.04 to 168.85) | 193 (118 to 301)    | 355 (254 to 497)    | 84.05 (16.03 to 200.18) | 9491 (4855 to 17734) | (10733 to 22385)     | 64.1 (-9.96 to 213.74)   |
| 16 |                              | 244790                    | 925074                    | 277.90                    |                     |                     |                         | 240231               | 239963               | -0.11                    |
| 17 | East Asia                    | (202981 to 291054)        | (788347 to 1085238)       | (260.33 to 300.79)        | 5734 (4169 to 7374) | 4983 (4074 to 5769) | (-36.64 to 22.31)       | (167510 to 299891)   | (187123 to 299808)   | (-25.58 to 54.11)        |
| 18 |                              | 233969                    | 237672                    |                           |                     |                     |                         | 72932                | 77123                |                          |
| 19 | Eastern Europe               | (199922 to 274757)        | (203164 to 276577)        | 1.58 (-0.80 to 4.10)      | 1305 (992 to 1507)  | 1633 (1370 to 1865) | 25.06 (5.75 to 56.78)   | (57526 to 88869)     | (63287 to 94008)     | 5.75 (-4.27 to 21.34)    |
| 20 |                              |                           |                           |                           |                     |                     |                         |                      |                      |                          |
| 21 | Eastern Sub-Saharan Africa   | 7067 (5804 to 8596)       | 18830 (15395 to 22997)    | 166.43 (160.39 to 173.14) | 697 (462 to 1111)   | 1253 (923 to 1678)  | 79.64 (7.37 to 192.58)  | (16916 to 68481)     | (39435 to 74044)     | 49.18 (-19.5 to 202.23)  |
| 22 |                              | 255028                    | 459062                    |                           |                     |                     |                         | 51699                | 78601                |                          |
| 23 | High-income Asia Pacific     | (213480 to 302123)        | (403027 to 520418)        | 80.00 (65.57 to 95.92)    | 685 (439 to 789)    | 694 (556 to 912)    | 1.33 (-19.66 to 85.83)  | (38591 to 66563)     | (55261 to 105049)    | 52.04 (37.02 to 68.81)   |
| 24 |                              | 1100006                   | 920750                    | -16.30                    |                     |                     |                         | 158.55               | 209072               | 245234                   |
| 25 | High-income North America    | (961428 to 1248970)       | (859032 to 982587)        | (-22.94 to -9.05)         | 2442 (2189 to 2964) | 6314 (5076 to 6886) | (83.64 to 182.08)       | (155328 to 270983)   | (200564 to 294018)   | 17.30 (2.00 to 33.02)    |
| 26 |                              |                           |                           |                           |                     |                     |                         |                      |                      |                          |
| 27 | North Africa and Middle East | 89159 (76544 to 102596)   | 282534 (239506 to 334478) | 216.89 (196.52 to 234.98) | 592 (407 to 836)    | 1033 (866 to 1226)  | 74.43 (20.30 to 164.45) | (35438 to 46318)     | (72755 to 91112)     | 105.30 (56.49 to 171.10) |
| 28 |                              |                           |                           |                           |                     |                     |                         |                      |                      |                          |
| 29 | Oceania                      | 199 (159 to 240)          | 417 (338 to 509)          | 109.69 (96.12 to 124.69)  | 22 (14 to 31)       | 36 (26 to 51)       | 65.38 (12.06 to 142.01) | 1036 (602 to 1625)   | 1696 (1107 to 2576)  | 63.81 (3.61 to 170.09)   |
| 30 |                              |                           |                           |                           |                     |                     |                         |                      |                      |                          |
| 31 | South Asia                   | 157942 (127077 to 195839) | 335746 (272330 to 413946) | 112.58 (106.64 to 120.13) | 3864 (2533 to 5504) | 5702 (4286 to 7410) | 47.58 (16.55 to 93.31)  | (171448 to 227334)   | (221978 to 278494)   | 29.47 (1.12 to 76.01)    |
| 32 |                              | 16557                     | 48152                     | 190.83                    |                     |                     |                         | 45316                | 46686                |                          |
| 33 | Southeast Asia               | (13040 to 20323)          | (39527 to 58063)          | (174.97 to 212.05)        | 1230 (741 to 1536)  | 1498 (1139 to 1771) | 21.79 (-3.10 to 72.54)  | (30762 to 56838)     | (38847 to 55186)     | 3.02 (-20.10 to 46.45)   |
| 34 |                              |                           |                           |                           |                     |                     |                         |                      |                      |                          |
| 35 | Southern Latin America       | 9153 (7618 to 10754)      | 15243 (12896 to 17896)    | 66.53 (58.55 to 74.68)    | 139 (123 to 151)    | 236 (210 to 280)    | 69.36 (46.49 to 101.01) | 5248 (4578 to 5993)  | 7740 (6670 to 9152)  | 47.49 (32.63 to 65.73)   |
| 36 |                              |                           |                           |                           |                     |                     |                         |                      |                      |                          |
| 37 |                              |                           |                           |                           |                     |                     |                         |                      |                      |                          |
| 38 |                              |                           |                           |                           |                     |                     |                         |                      |                      |                          |
| 39 |                              |                           |                           |                           |                     |                     |                         |                      |                      |                          |
| 40 |                              |                           |                           |                           |                     |                     |                         |                      |                      |                          |
| 41 |                              |                           |                           |                           |                     |                     |                         |                      |                      |                          |
| 42 |                              |                           |                           |                           |                     |                     |                         |                      |                      |                          |
| 43 |                              |                           |                           |                           |                     |                     |                         |                      |                      |                          |
| 44 |                              |                           |                           |                           |                     |                     |                         |                      |                      |                          |
| 45 |                              |                           |                           |                           |                     |                     |                         |                      |                      |                          |
| 46 |                              |                           |                           |                           |                     |                     |                         |                      |                      |                          |
| 47 |                              |                           |                           |                           |                     |                     |                         |                      |                      |                          |
| 48 |                              |                           |                           |                           |                     |                     |                         |                      |                      |                          |
| 49 |                              |                           |                           |                           |                     |                     |                         |                      |                      |                          |
| 50 |                              |                           |                           |                           |                     |                     |                         |                      |                      |                          |
| 51 |                              |                           |                           |                           |                     |                     |                         |                      |                      |                          |
| 52 |                              |                           |                           |                           |                     |                     |                         |                      |                      |                          |
| 53 |                              |                           |                           |                           |                     |                     |                         |                      |                      |                          |
| 54 |                              |                           |                           |                           |                     |                     |                         |                      |                      |                          |
| 55 |                              |                           |                           |                           |                     |                     |                         |                      |                      |                          |
| 56 |                              |                           |                           |                           |                     |                     |                         |                      |                      |                          |
| 57 |                              |                           |                           |                           |                     |                     |                         |                      |                      |                          |
| 58 |                              |                           |                           |                           |                     |                     |                         |                      |                      |                          |
| 59 |                              |                           |                           |                           |                     |                     |                         |                      |                      |                          |
| 60 |                              |                           |                           |                           |                     |                     |                         |                      |                      |                          |

|    |                |            |            |              |             |              |              |            |            |              |
|----|----------------|------------|------------|--------------|-------------|--------------|--------------|------------|------------|--------------|
| 1  |                |            |            |              |             |              |              |            |            |              |
| 2  |                |            |            |              |             |              |              |            |            |              |
| 3  |                | 18023)     |            |              |             |              |              |            |            |              |
| 4  |                |            |            |              |             |              |              |            |            |              |
| 5  | Southern       | 3760 (3109 | 8141 (6736 | 116.54       | 138 (99 to  | 240 (198 to  | 74.44 (31.74 | 6615 (4279 | 9230 (7542 | 39.54 (-0.67 |
| 6  | Sub-Saharan    | to 4581)   | to 9864)   | (109.70 to   | 169)        | 278)         | to 161.11)   | to 9518)   | to 10926)  | to 121.74)   |
| 7  | Africa         |            |            | 124.72)      |             |              |              |            |            |              |
| 8  |                | 74856      | 117653     |              |             |              | 129.84       | 27724      | 46997      |              |
| 9  | Tropical Latin | (65373 to  | (102012 to | 57.17 (51.82 | 455 (400 to | 1047 (950    | (109.36 to   | (23589 to  | (40115 to  | 69.52 (59.16 |
| 10 | America        | 85425)     | 134397)    | to 63.44)    | 492)        | to 1217)     | 167.46)      | 32357)     | 54972)     | to 83.74)    |
| 11 |                | 707145     | 1026504    |              |             |              | 160.46       | 185733     | 310691     |              |
| 12 | Western Europe | (634121 to | (925440 to | 45.16 (41.37 | 4600 (4132  | 11981 (9244  | (66.17 to    | (149509 to | (255911 to | 67.28 (34.40 |
| 13 |                | 786986)    | 1127578)   | to 48.78)    | to 5864)    | to 13315)    | 190.17)      | 227830)    | 371106)    | to 79.72)    |
| 14 | Western        | 10222      | 28965      | 183.36       |             |              |              | 31197      | 56026      |              |
| 15 | Sub-Saharan    | (8432 to   | (23820 to  | (178.45 to   | 634 (365 to | 1178 (805 to | 85.67 (40.49 | (14381 to  | (35327 to  | 79.59 (30.21 |
| 16 | Africa         | 12421)     | 35133)     | 188.56)      | 996)        | 1610)        | to 177.24)   | 47867)     | 78051)     | to 198.66)   |

Abbreviations: GBD=Global Burden of Disease. SDI=Socio-demographic Index.  
 UI=uncertainty interval.



**Supplementary Table 2** Prevalent cases, deaths and disability adjusted life years (DALYs) for inflammatory bowel disease (IBD) by 204 countries or territories in 2019 and 2019, and their percentage change from 1990 to 2019

| Characteristics     | Prevalent cases        |                        |                                     | Deaths              |                     |                                     | DALYs               |                       |                                     |
|---------------------|------------------------|------------------------|-------------------------------------|---------------------|---------------------|-------------------------------------|---------------------|-----------------------|-------------------------------------|
|                     | 1990 No.<br>(95%UI)    | 2019 No.<br>(95%UI)    | Percentage<br>change (%)<br>(95%UI) | 1990 No.<br>(95%UI) | 2019 No.<br>(95%UI) | Percentage<br>change (%)<br>(95%UI) | 1990 No.<br>(95%UI) | 2019 No.<br>(95%UI)   | Percentage<br>change (%)<br>(95%UI) |
| Afghanistan         | 1738 (1410 to 2120)    | 5699 (4548 to 7113)    | 228.01 (200.09 to 258.61)           | 31 (14 to 55)       | 58 (31 to 89)       | 88.34 (29.82 to 190.04)             | 1237 (627 to 2377)  | 3017 (1879 to 4660)   | 143.91 (72.00 to 244.29)            |
| Albania             | 3324 (2792 to 3928)    | 3896 (3286 to 4630)    | 17.22 (7.74 to 27.7)                | 50 (21 to 65)       | 13 (9 to 19)        | -74.70 (-84.65 to -32.21)           | 3904 (1399 to 5200) | 991 (727 to 1300)     | -74.62 (-83.28 to -33.39)           |
| Algeria             | 5982 (5169 to 6928)    | 16875 (13593 to 20871) | 182.11 (149.55 to 221.44)           | 28 (18 to 44)       | 53 (38 to 70)       | 90.14 (11.64 to 209.90)             | 1826 (1320 to 2675) | 4021 (2997 to 5295)   | 120.18 (51.51 to 190.24)            |
| American Samoa      | 2 (2 to 3)             | 3 (3 to 4)             | 48.88 (37.37 to 61.93)              | 0 (0 to 1)          | 0 (0 to 0)          | -37.72 (-65.35 to 47.30)            | 15 (9 to 21)        | 8 (5 to 14)           | -47.39 (-70.61 to 25.25)            |
| Andorra             | 69 (58 to 81)          | 133 (111 to 159)       | 93.79 (79.63 to 110.16)             | 0 (0 to 0)          | 1 (1 to 2)          | 266.11 (124.63 to 467.38)           | 17 (13 to 23)       | 36 (26 to 47)         | 111.42 (66.64 to 167.41)            |
| Angola              | 460 (373 to 573)       | 1648 (1338 to 2017)    | 258.10 (233.16 to 285.26)           | 37 (17 to 76)       | 78 (52 to 117)      | 112.25 (2.89 to 349.24)             | 1913 (713 to 4719)  | 3662 (2249 to 5786)   | 91.46 (-19.81 to 397.70)            |
| Antigua and Barbuda | 17 (14 to 20)          | 34 (28 to 41)          | 102.06 (85.45 to 119.33)            | 1 (0 to 1)          | 1 (0 to 1)          | 17.47 (-15.05 to 92.04)             | 18 (13 to 20)       | 22 (18 to 28)         | 25.07 (-4.44 to 87.07)              |
| Argentina           | 4828 (3926 to 5756)    | 7825 (6413 to 9484)    | 62.10 (49.74 to 73.10)              | 84 (74 to 93)       | 143 (124 to 169)    | 71.49 (45.04 to 102.47)             | 2981 (2577 to 3433) | 4556 (3904 to 5373)   | 52.84 (34.77 to 71.30)              |
| Armenia             | 2547 (2109 to 3013)    | 3263 (2744 to 3956)    | 28.11 (18.76 to 37.72)              | 7 (5 to 9)          | 11 (8 to 13)        | 51.30 (17.69 to 101.11)             | 637 (492 to 805)    | 764 (593 to 979)      | 19.86 (4.07 to 38.21)               |
| Australia           | 18262 (15282 to 21523) | 44624 (39169 to 50438) | 144.35 (122.23 to 167.82)           | 97 (85 to 120)      | 369 (259 to 430)    | 279.18 (123.37 to 350.95)           | 4536 (3533 to 5743) | 11569 (9111 to 14334) | 155.05 (104.34 to 184.94)           |
| Austria             | 25345 (22242 to 28177) | 33080 (29600 to 37293) | 30.52 (19.87 to 42.12)              | 99 (88 to 133)      | 101 (80 to 165)     | 2.52 (-14.48 to 30.58)              | 5699 (4484 to 7140) | 6463 (4736 to 8366)   | 13.41 (1.99 to 27.18)               |
| Azerbaijan          | 4623 (3817 to 5491)    | 9463 (7886 to 11458)   | 104.71 (89.06 to 120.81)            | 12 (9 to 15)        | 13 (10 to 18)       | 12.27 (-26.26 to 63.36)             | 1080 (815 to 1410)  | 1829 (1289 to 2470)   | 69.47 (44.70 to 98.86)              |
| Bahamas             | 65 (55 to 77)          | 123 (102 to 152)       | 88.60 (70.75 to 107.18)             | 1 (1 to 1)          | 2 (1 to 2)          | 82.56 (39.32 to 142.99)             | 49 (41 to 57)       | 78 (63 to 98)         | 60.27 (27.44 to 102.98)             |
| Bahrain             | 179 (152 to 212)       | 846 (688 to 1004)      | 373.26 (300.00 to 446.52)           | 0 (0 to 1)          | 1 (1 to 2)          | 178.61 (100.00 to 257.22)           | 44 (32 to 56)       | 167 (116 to 218)      | 283.01 (180.00 to 386.02)           |

|    |                |             |              |               |              |              |              |              |              |              |
|----|----------------|-------------|--------------|---------------|--------------|--------------|--------------|--------------|--------------|--------------|
| 1  |                |             |              |               |              |              |              |              |              |              |
| 2  |                |             |              |               |              |              |              |              |              |              |
| 3  |                | 206)        | 1035)        | (309.51 to    |              | (82.33 to    | 57)          | 229)         | (204.71 to   |              |
| 4  |                |             |              | 442.36)       |              | 326.1)       |              |              | 374.48)      |              |
| 5  |                |             |              |               |              |              |              |              |              |              |
| 6  |                |             | 33018        | 180.14        | 544 (333 to  | 713 (431 to  | 30.90        | 23781        | 26354        | 10.82        |
| 7  | Bangladesh     | 11786 (9494 | (26285 to    | (157.01 to    | 805)         | 1068)        | (-18.82 to   | (13440 to    | (17363 to    | (-35.76 to   |
| 8  |                | to 14655)   | 41258)       | 203.31)       |              |              | 117.77)      | 35324)       | 37248)       | 104.55)      |
| 9  |                |             |              |               |              |              |              |              |              |              |
| 10 | Barbados       | 183 (153 to | 282 (238 to  | 54.27 (41.76  | 1 (1 to 1)   | 2 (1 to 2)   | 48.15 (12.33 | 58 (47 to    | 81 (62 to    | 39.17 (18.58 |
| 11 |                | 218)        | 340)         | to 69.09)     |              |              | to 96.63)    | 71)          | 101)         | to 61.35)    |
| 12 |                |             |              |               |              |              |              |              |              |              |
| 13 | Belarus        | 9910 (8453  | 11335 (9509  | 14.38 (6.51   | 45 (32 to    | 58 (42 to    | 29.88 (-8.49 | 2690 (2011   | 3063 (2364   | 13.87 (-6.13 |
| 14 |                | to 11723)   | to 13529)    | to 23.58)     | 60)          | 77)          | to 97.40)    | to 3484)     | to 3923)     | to 41.64)    |
| 15 |                |             | 20093        | 107.97        | 113 (99 to   | 273 (206 to  | 141.39       | 3307 (2755   | 6370 (5236   | 92.63 (55.31 |
| 16 | Belgium        | 9661 (8871  | (17518 to    | (87.58 to     | 134)         | 319)         | (64.63 to    | to 3921)     | to 7678)     | to 116.01)   |
| 17 |                | to 10430)   | 22821)       | 131.05)       |              |              | 188.06)      |              |              |              |
| 18 |                |             |              | 230.96        |              |              | 117.53       |              |              |              |
| 19 |                |             |              |               |              |              |              |              |              |              |
| 20 | Belize         | 26 (22 to   | 87 (71 to    | (204.21 to    | 1 (1 to 1)   | 2 (1 to 2)   | (55.55 to    | 40 (29 to    | 77 (64 to    | 91.51 (43.10 |
| 21 |                | 32)         | 106)         | 258.71)       |              |              | 286.06)      | 50)          | 97)          | to 212.80)   |
| 22 |                |             |              |               |              |              |              |              |              |              |
| 23 |                |             |              | 227.98        |              |              | 116.13       |              |              | 107.25       |
| 24 | Benin          | 209 (171 to | 685 (549 to  | (203.9 to     | 14 (6 to 24) | 30 (18 to    | (28.68 to    | 694 (232 to  | 1437 (773 to | (11.24 to    |
| 25 |                | 253)        | 838)         | 255.4)        |              | 44)          | 334.23)      | 1320)        | 2281)        | 374.73)      |
| 26 |                |             |              |               |              |              |              |              |              |              |
| 27 |                |             |              |               |              |              | -15.72       |              |              | -22.33       |
| 28 | Bermuda        | 23 (19 to   | 33 (27 to    | 42.79 (30.81  | 1 (0 to 1)   | 0 (0 to 1)   | (-38.69 to   | 18 (14 to    | 14 (11 to    | (-40.21 to   |
| 29 |                | 28)         | 39)          | to 55.62)     |              |              | 37.20)       | 21)          | 18)          | 11.58)       |
| 30 |                |             |              |               |              |              |              |              |              |              |
| 31 |                |             |              | 140.27        |              |              |              |              |              | 18.91        |
| 32 | Bhutan         | 66 (52 to   | 158 (128 to  | (120.87 to    | 2 (1 to 4)   | 3 (2 to 7)   | 57.00 (-6.75 | 86 (38 to    | 102 (67 to   | (-35.13 to   |
| 33 |                | 83)         | 197)         | 162.46)       |              |              | to 195.84)   | 160)         | 202)         | 133.49)      |
| 34 |                |             |              |               |              |              |              |              |              |              |
| 35 | Bolivia        |             |              | 145.90        |              |              | 39.57        |              |              | -13.09       |
| 36 | (Plurinational | 569 (473 to | 1400 (1171   | (129.42 to    | 25 (10 to    | 34 (26 to    | (-28.99 to   | 1552 (546 to | 1348 (986 to | (-59.56 to   |
| 37 | State of)      | 694)        | to 1693)     | 165.45)       | 48)          | 45)          | 217.03)      | 3375)        | 1772)        | 134.61)      |
| 38 |                |             |              |               |              |              |              |              |              |              |
| 39 | Bosnia and     | 4910 (4225  | 5387 (4726   | 9.73 (1.15 to | 18 (12 to    | 26 (13 to    | 40.25        | 1285 (987 to | 1372 (949 to | 6.80 (-13.90 |
| 40 | Herzegovina    | to 5717)    | to 6247)     | 17.87)        | 23)          | 35)          | (-11.49 to   | 1644)        | 1778)        | to 28.67)    |
| 41 |                |             |              |               |              |              | 108.03)      |              |              |              |
| 42 |                |             |              | 214.79        |              |              | 104.82       |              |              | 106.67       |
| 43 | Botswana       | 70 (58 to   | 221 (179 to  | (189.25 to    | 4 (3 to 6)   | 9 (6 to 13)  | (14.62 to    | 188 (121 to  | 388 (241 to  | (18.10 to    |
| 44 |                | 86)         | 276)         | 244.24)       |              |              | 221.73)      | 269)         | 620)         | 226.68)      |
| 45 |                |             |              |               |              |              |              |              |              |              |
| 46 |                | 73860       | 115697       |               |              |              | 129.44       | 27396        | 46350        |              |
| 47 | Brazil         | (64511 to   | (100339 to   | 56.64 (51.18  | 451 (396 to  | 1035 (939 to | (108.60 to   | (23325 to    | (39647 to    | 69.18 (58.65 |
| 48 |                | 84264)      | 132222)      | to 62.94)     | 488)         | 1207)        | 167.01)      | 31992)       | 54190)       | to 83.50)    |
| 49 |                |             |              |               |              |              |              |              |              |              |
| 50 |                |             |              | 134.79        |              |              | 127.20       |              |              |              |
| 51 | Brunei         | 126 (100 to | 295 (237 to  | (114.54 to    | 1 (1 to 2)   | 3 (2 to 3)   | (58.12 to    | 57 (40 to    | 114 (89 to   | 99.44 (53.62 |
| 52 | Darussalam     | 155)        | 361)         | 156.55)       |              |              | 237.13)      | 85)          | 147)         | to 164.86)   |
| 53 |                |             |              |               |              |              |              |              |              |              |
| 54 |                | 13507       |              | -16.53        |              |              |              |              |              | -7.55        |
| 55 | Bulgaria       | (11443 to   | 11275 (9602  | (-23.08 to    | 25 (22 to    | 41 (32 to    | 65.55 (22.25 | 2779 (2081   | 2569 (1937   | (-19.78 to   |
| 56 |                | 15898)      | to 13477)    | -9.27)        | 32)          | 51)          | to 118.70)   | to 3597)     | to 3319)     | 6.98)        |
| 57 |                |             |              |               |              |              |              |              |              |              |
| 58 | Burkina Faso   | 392 (318 to | 1098 (901 to | 180.10        | 35 (16 to    | 81 (41 to    | 130.36       | 1781 (607 to | 3942 (1729   | 121.28       |
| 59 |                | 485)        | 1347)        | (158.26 to    | 58)          | 129)         | (25.65 to    | 3594)        | to 7006)     | (15.32 to    |
| 60 |                |             |              |               |              |              |              |              |              |              |

|    |                 |             |             |              |              |              |              |              |              |              |
|----|-----------------|-------------|-------------|--------------|--------------|--------------|--------------|--------------|--------------|--------------|
| 1  |                 |             |             |              |              |              |              |              |              |              |
| 2  |                 |             |             |              |              |              |              |              |              |              |
| 3  |                 |             |             |              |              |              |              |              |              |              |
| 4  |                 |             |             | 200.27)      |              |              | 350.02)      |              |              | 380.59)      |
| 5  |                 |             |             | 121.41       |              |              |              |              |              | 51.13        |
| 6  | Burundi         | 207 (169 to | 459 (369 to | (105.47 to   | 21 (13 to    | 38 (24 to    | 76.44 (-8.52 | 1064 (461 to | 1608 (1001   | (-33.49 to   |
| 7  |                 | 255)        | 561)        | 137.36)      | 37)          | 58)          | to 253.21)   | 2387)        | to 2527)     | 272.32)      |
| 8  |                 |             |             |              |              |              |              |              |              |              |
| 9  |                 |             |             | 176.77       |              |              | 37.26        |              |              | 28.23        |
| 10 | Cabo Verde      | 23 (19 to   | 63 (51 to   | (156.29 to   | 1 (0 to 1)   | 1 (1 to 1)   | (-16.62 to   | 34 (21 to    | 43 (35 to    | (-15.29 to   |
| 11 |                 | 28)         | 78)         | 198.45)      |              |              | 131.63)      | 47)          | 54)          | 118.40)      |
| 12 |                 |             |             |              |              |              |              |              |              |              |
| 13 |                 |             |             | 172.54       |              |              | 46.42 (-4.73 | 1175 (547 to | 1222 (890 to | 3.97 (-44.25 |
| 14 | Cambodia        | 218 (168 to | 595 (467 to | (148.48 to   | 26 (14 to    | 38 (26 to    | to 167.94)   | 2166)        | 1546)        | to 128.29)   |
| 15 |                 | 273)        | 730)        | 197.52)      | 39)          | 48)          |              |              |              |              |
| 16 |                 |             |             |              |              |              |              |              |              |              |
| 17 |                 |             |             | 259.93       |              |              | 95.05 (-1.81 | 1367 (583 to | 2830 (1520   | 107.06       |
| 18 | Cameroon        | 538 (438 to | 1938 (1576  | (232.74 to   | 30 (14 to    | 58 (30 to    | to 218.33)   | 2134)        | to 4639)     | (11.41 to    |
| 19 |                 | 666)        | to 2393)    | 288.04)      | 46)          | 95)          |              |              |              | 245.01)      |
| 20 |                 |             |             |              |              |              |              |              |              |              |
| 21 |                 | 116922      | 157737      | 34.91 (23.15 | 270 (241 to  | 403 (323 to  | 49.15 (24.68 | 22694        | 29915        | 31.82 (19.21 |
| 22 | Canada          | (112352 to  | (142113 to  | to 47.18)    | 302)         | 605)         | to 106.93)   | (17260 to    | (21904 to    | to 46.22)    |
| 23 |                 | 121655)     | 173888)     |              |              |              |              | 29101)       | 38441)       |              |
| 24 |                 |             |             |              |              |              |              |              |              |              |
| 25 | Central African | 116 (95 to  | 243 (199 to | (91.54 to    | 12 (7 to 19) | 21 (12 to    | 80.23 (18.71 | 510 (273 to  | 890 (475 to  | 74.48 (9.24  |
| 26 | Republic        | 145)        | 299)        | 126.84)      |              | 35)          | to 166.11)   | 935)         | 1568)        | to 167.75)   |
| 27 |                 |             |             |              |              |              |              |              |              |              |
| 28 |                 |             |             | 184.44       |              |              | 108.90       |              |              | 117.09       |
| 29 | Chad            | 251 (205 to | 713 (580 to | (162.13 to   | 21 (10 to    | 44 (25 to    | (42.17 to    | 960 (360 to  | 2084 (1020   | (31.20 to    |
| 30 |                 | 306)        | 881)        | 208.28)      | 35)          | 64)          | 222.10)      | 1689)        | to 3460)     | 260.72)      |
| 31 |                 |             |             |              |              |              |              |              |              |              |
| 32 |                 |             |             | 80.06 (68.43 | 46 (36 to    | 70 (59 to    | 53.60 (25.60 | 1928 (1573   | 2612 (2169   | 35.45 (14.76 |
| 33 | Chile           | 3739 (3165  | 6732 (5813  | to 93.27)    | 51)          | 89)          | to 123.36)   | to 2244)     | to 3169)     | to 72.90)    |
| 34 |                 | to 4369)    | to 7788)    |              |              |              |              |              |              |              |
| 35 |                 | 239473      | 911045      | 280.44       |              |              | -15.89       | 234245       | 232464       | -0.76        |
| 36 | China           | (198363 to  | (776347 to  | (262.77 to   | 5560 (4048   | 4676 (3774   | (-39.57 to   | (162916 to   | (179903 to   | (-26.71 to   |
| 37 |                 | 285024)     | 1069533)    | 303.34)      | to 7203)     | to 5461)     | 19.52)       | 293663)      | 291090)      | 54.23)       |
| 38 |                 |             |             |              |              |              |              |              |              |              |
| 39 |                 |             | 15348       | 127.99       |              |              | 175.73       |              |              |              |
| 40 | Colombia        | 6732 (5626  | (13025 to   | (113.25 to   | 56 (48 to    | 154 (116 to  | (106.78 to   | 3215 (2689   | 6419 (4991   | 99.66 (64.35 |
| 41 |                 | to 7997)    | 18234)      | 144.58)      | 61)          | 202)         | 258.47)      | to 3798)     | to 7986)     | to 143.95)   |
| 42 |                 |             |             |              |              |              |              |              |              |              |
| 43 |                 |             |             | 123.01       |              |              |              |              |              | 54.58        |
| 44 | Comoros         | 21 (17 to   | 48 (39 to   | (106.31 to   | 2 (1 to 3)   | 4 (2 to 6)   | 81.66 (13.33 | 77 (29 to    | 119 (75 to   | (-16.19 to   |
| 45 |                 | 26)         | 60)         | 142.32)      |              |              | to 277.77)   | 137)         | 174)         | 298.98)      |
| 46 |                 |             |             |              |              |              |              |              |              |              |
| 47 |                 |             |             | 189.59       |              |              | 87.61 (15.68 | 396 (237 to  | 681 (463 to  | 72.21 (-4.05 |
| 48 | Congo           | 145 (120 to | 421 (343 to | (170.45 to   | 9 (6 to 14)  | 17 (12 to    | to 196.61)   | 645)         | 980)         | to 195.14)   |
| 49 |                 | 178)        | 518)        | 215.68)      |              | 25)          |              |              |              |              |
| 50 |                 |             |             |              |              |              |              |              |              |              |
| 51 |                 |             |             | 28.57 (18.27 |              |              | -14.75       |              |              | -33.66       |
| 52 | Cook Islands    | 1 (1 to 1)  | 1 (1 to 2)  | to 40.87)    | 0 (0 to 0)   | 0 (0 to 0)   | (-42.49 to   | 8 (5 to 11)  | 5 (3 to 7)   | (-57.85 to   |
| 53 |                 |             |             |              |              |              | 32.51)       |              |              | 4.48)        |
| 54 |                 |             |             |              |              |              |              |              |              |              |
| 55 |                 |             |             | 144.55       |              |              | 270.81       |              |              |              |
| 56 | Costa Rica      | 670 (560 to | 1637 (1380  | (127.55 to   | 3 (2 to 3)   | 10 (7 to 13) | (169.90 to   | 190 (150 to  | 524 (399 to  | 176.16 (128  |
| 57 |                 | 796)        | to 1937)    | 162.48)      |              |              | 398.49)      | 238)         | 669)         | to 235.84)   |
| 58 |                 |             |             |              |              |              |              |              |              |              |
| 59 | Côte d'Ivoire   | 578 (465 to | 1562 (1251  | 170.18       | 25 (11 to    | 54 (32 to    | 111.95       | 1324 (535 to | 2583 (1501   | 95.11 (14.75 |
| 60 |                 | 714)        | to 1950)    | (151.08 to   | 42)          | 79)          | (32.09 to    | 2260)        | to 3952)     | to 276.09)   |

|    |                 |             |             |              |              |             |              |             |              |              |
|----|-----------------|-------------|-------------|--------------|--------------|-------------|--------------|-------------|--------------|--------------|
| 1  |                 |             |             |              |              |             |              |             |              |              |
| 2  |                 |             |             |              |              |             |              |             |              |              |
| 3  |                 |             |             | 190.01)      |              |             | 290.61)      |             |              |              |
| 4  |                 |             |             |              |              |             | 106.49       |             |              |              |
| 5  |                 | 9449 (8823  | 10780 (9980 | 14.09 (9.79  | 16 (14 to    | 33 (25 to   | 1866 (1411   | 2288 (1717  | 22.61 (2.99  |              |
| 6  | Croatia         | to 10129)   | to 11592)   | to 18.67)    | 24)          | 42)         | (18.11 to    | to 2410)    | to 2898)     | to 39.06)    |
| 7  |                 |             |             |              |              |             | 180.74)      |             |              |              |
| 8  |                 |             |             |              |              |             | 16.33        |             |              |              |
| 9  |                 | 3240 (2702  | 4574 (3750  | 41.18 (29.72 | 36 (23 to    | 42 (33 to   | 1518 (1151   | 1682 (1335  | 10.76 (-8.18 |              |
| 10 | Cuba            | to 3901)    | to 5525)    | to 54.70)    | 43)          | 53)         | (-11.71 to   | to 1818)    | to 2085)     | to 38.33)    |
| 11 |                 |             |             |              |              |             | 79.06)       |             |              |              |
| 12 |                 |             |             | 179.86       |              |             |              |             |              |              |
| 13 |                 | 344 (292 to | 962 (870 to | (151.26 to   | 12 (7 to 16) | 16 (12 to   | 35.72 (-8.18 | 257 (180 to | 370 (303 to  | 43.92 (7.35  |
| 14 | Cyprus          | 400)        | 1050)       | 216.30)      |              | 20)         | to 121.22)   | 333)        | 444)         | to 105.55)   |
| 15 |                 |             |             |              |              |             |              |             |              |              |
| 16 |                 |             | 20802       | 103.57       |              |             |              |             |              |              |
| 17 |                 | 10218 (8616 | (19084 to   | (74.68 to    | 71 (64 to    | 114 (87 to  | 59.45 (13.25 | 3246 (2697  | 5259 (4127   | 62.01 (34.95 |
| 18 | Czechia         | to 12269)   | 22519)      | 138.01)      | 82)          | 141)        | to 100.62)   | to 3932)    | to 6597)     | to 90.03)    |
| 19 |                 |             |             |              |              |             |              |             |              |              |
| 20 | Democratic      |             |             |              |              |             |              |             |              |              |
| 21 | People's        | 3097 (2554  | 4965 (4120  | 60.33 (48.19 | 74 (41 to    | 108 (75 to  | 45.76 (-9.28 | 3363 (1697  | 3161 (2323   | -5.99        |
| 22 | Republic of     | to 3714)    | to 5978)    | to 72.89)    | 114)         | 147)        | to 166.1)    | to 6033)    | to 4117)     | (-46.37 to   |
| 23 | Korea           |             |             |              |              |             |              |             |              | 81.39)       |
| 24 |                 |             |             |              |              |             |              |             |              |              |
| 25 | Democratic      |             |             | 125.06       |              |             |              |             |              | 55.18        |
| 26 | Republic of the | 1975 (1605  | 4445 (3597  | (107.08 to   | 130 (79 to   | 231 (159 to | 77.23 (4.65  | 6456 (3284  | 10018 (6738  | (-21.39 to   |
| 27 | Congo           | to 2418)    | to 5502)    | 145.69)      | 207)         | 336)        | to 194.58)   | to 12595)   | to 15367)    | 209.02)      |
| 28 |                 |             |             |              |              |             |              |             |              |              |
| 29 |                 | 13729       | 15310       | 11.51 (5.37  | 43 (38 to    | 70 (60 to   | 65.35 (42.63 | 2893 (2227  | 3391 (2644   | 17.21 (8.04  |
| 30 | Denmark         | (12468 to   | (13920 to   | to 17.43)    | 50)          | 83)         | to 92.58)    | to 3654)    | to 4239)     | to 27.16)    |
| 31 |                 | 15154)      | 16882)      |              |              |             |              |             |              |              |
| 32 |                 |             |             | 342.41       |              |             | 190.20       |             |              | 138.93       |
| 33 |                 | 20 (16 to   | 90 (72 to   | (307.26 to   | 1 (1 to 2)   | 3 (2 to 5)  | (72.46 to    | 60 (27 to   | 144 (88 to   | (25.91 to    |
| 34 | Djibouti        | 25)         | 111)        | 378.51)      |              |             | 408.23)      | 121)        | 236)         | 367.14)      |
| 35 |                 |             |             |              |              |             |              |             |              |              |
| 36 |                 |             |             |              |              |             | -9.08        |             |              | -11.16       |
| 37 |                 | 19 (16 to   | 22 (18 to   | 17.43 (7.09  | 1 (1 to 1)   | 1 (0 to 1)  | (-35.39 to   | 23 (19 to   | 21 (16 to    | (-34.54 to   |
| 38 | Dominica        | 23)         | 27)         | to 28.52)    |              |             | 27.05)       | 28)         | 27)          | 19.86)       |
| 39 |                 |             |             |              |              |             |              |             |              |              |
| 40 |                 |             |             | 103.40       |              |             |              |             |              |              |
| 41 | Dominican       | 1239 (1022  | 2521 (2070  | (87.28 to    | 11 (9 to 16) | 22 (16 to   | 99.41 (29.65 | 732 (527 to | 1109 (821 to | 51.44 (0.42  |
| 42 | Republic        | to 1507)    | to 3084)    | 121.86)      |              | 30)         | to 202.38)   | 1060)       | 1450)        | to 118.17)   |
| 43 |                 |             |             |              |              |             |              |             |              |              |
| 44 |                 |             |             | 186.04       |              |             | 107.95       |             |              |              |
| 45 |                 | 1159 (1021  | 3315 (2981  | (172.00 to   | 16 (12 to    | 34 (24 to   | (37.86 to    | 982 (705 to | 1475 (1120   | 50.25 (3.59  |
| 46 | Ecuador         | to 1302)    | to 3667)    | 200.27)      | 21)          | 44)         | 223.02)      | 1302)       | to 1823)     | to 124.68)   |
| 47 |                 |             |             |              |              |             |              |             |              |              |
| 48 |                 | 17107       | 39271       | 129.56       |              |             |              |             |              | 109.10       |
| 49 |                 | (14592 to   | (31782 to   | (97.49 to    | 59 (35 to    | 119 (70 to  | 100.85 (5.49 | 4521 (3160  | 9453 (6709   | (57.59 to    |
| 50 | Egypt           | 19726)      | 48388)      | 159.21)      | 119)         | 186)        | to 238.69)   | to 6354)    | to 12613)    | 171.14)      |
| 51 |                 |             |             |              |              |             |              |             |              |              |
| 52 |                 |             |             |              |              |             | -28.67       |             |              | -33.83       |
| 53 |                 | 842 (701 to | 1478 (1239  | 75.42 (62.88 | 13 (8 to 16) | 9 (7 to 12) | (-54.13 to   | 661 (461 to | 437 (329 to  | (-55.24 to   |
| 54 | El Salvador     | 998)        | to 1741)    | to 87.97)    |              |             | 18.21)       | 881)        | 574)         | -1.58)       |
| 55 |                 |             |             |              |              |             |              |             |              |              |
| 56 |                 |             |             | 397.19       |              |             |              |             |              | 63.28        |
| 57 | Equatorial      | 19 (16 to   | 95 (79 to   | (353.40 to   | 2 (1 to 3)   | 3 (2 to 4)  | 66.29 (-6.86 | 73 (37 to   | 119 (73 to   | (-22.44 to   |
| 58 | Guinea          | 24)         | 117)        | 443.01)      |              |             | to 195.01)   | 135)        | 184)         | 233.97)      |
| 59 |                 |             |             |              |              |             |              |             |              |              |
| 60 |                 |             |             |              |              |             |              |             |              |              |

|    |           |             |             |              |              |             |              |              |              |              |
|----|-----------|-------------|-------------|--------------|--------------|-------------|--------------|--------------|--------------|--------------|
| 1  |           |             |             |              |              |             |              |              |              |              |
| 2  |           |             |             |              |              |             |              |              |              |              |
| 3  |           |             | 186.49      |              |              | 165.47      |              |              | 114.61       |              |
| 4  | Eritrea   | 114 (93 to  | 327 (263 to | (164.83 to   | 9 (4 to 17)  | 23 (15 to   | (22.99 to    | 474 (168 to  | 1017 (645 to | (-12.62 to   |
| 5  |           | 141)        | 398)        | 210.17)      |              | 34)         | 516.12)      | 1107)        | 1643)        | 493.09)      |
| 6  |           |             |             |              |              |             |              |              |              |              |
| 7  |           |             |             |              |              |             | -17.88       |              |              | -12.32       |
| 8  | Estonia   | 1311 (1148  | 1821 (1593  | 38.90 (26.62 | 10 (9 to 12) | 9 (6 to 11) | (-40.41 to   | 511 (425 to  | 448 (341 to  | (-28.71 to   |
| 9  |           | to 1494)    | to 2066)    | to 51.17)    |              |             | 15.88)       | 601)         | 573)         | 9.89)        |
| 10 |           |             |             |              |              |             |              |              |              |              |
| 11 |           |             |             | 109.48       |              |             |              |              |              | 44.21        |
| 12 | Eswatini  | 38 (31 to   | 80 (65 to   | (95.32 to    | 2 (1 to 3)   | 4 (2 to 5)  | 72.30 (1.22  | 106 (47 to   | 153 (101 to  | (-27.03 to   |
| 13 |           | 47)         | 98)         | 125.52)      |              |             | to 254.21)   | 206)         | 227)         | 242.69)      |
| 14 |           |             |             |              |              |             |              |              |              |              |
| 15 |           |             |             | 152.76       |              |             |              |              |              | 13.90        |
| 16 | Ethiopia  | 1763 (1447  | 4457 (3634  | (143.58 to   | 219 (128 to  | 325 (197 to | (-33.27 to   | 11296 (4911  | 12866 (8426  | (-51.97 to   |
| 17 |           | to 2135)    | to 5454)    | 162.31)      | 398)         | 489)        | 200.06)      | to 25054)    | to 19913)    | 197.17)      |
| 18 |           |             |             |              |              |             |              |              |              |              |
| 19 |           |             |             |              |              |             | 27.79        |              |              | 14.67        |
| 20 | Fiji      | 28 (23 to   | 42 (35 to   | 50.29 (36.12 | 1 (1 to 2)   | 2 (1 to 2)  | (-16.31 to   | 59 (45 to    | 68 (49 to    | (-24.77 to   |
| 21 |           | 34)         | 52)         | to 66.63)    |              |             | 91.11)       | 80)          | 91)          | 72.54)       |
| 22 |           |             |             |              |              |             |              |              |              |              |
| 23 |           |             | 19960       | 111.22       |              |             |              |              |              |              |
| 24 | Finland   | 9450 (8777  | (17972 to   | (94.08 to    | 33 (24 to    | 39 (33 to   | 18.82 (-5.40 | 2012 (1537   | 3465 (2517   | 72.24 (51.93 |
| 25 |           | to 10150)   | 22078)      | 127.73)      | 39)          | 46)         | to 68.55)    | to 2571)     | to 4569)     | to 93.91)    |
| 26 |           |             |             |              |              |             |              |              |              |              |
| 27 |           | 60982       | 101092      | 65.77 (54.06 | 943 (807 to  | 2181 (1253  | 131.25       | 23073        | 40856        | 77.07 (34.58 |
| 28 | France    | (55563 to   | (91225 to   | to 77.24)    | 1043)        | to 2615)    | (51.63 to    | (19741 to    | (30081 to    | to 97.82)    |
| 29 |           | 66348)      | 111418)     |              |              |             | 168.76)      | 26699)       | 48291)       |              |
| 30 |           |             |             |              |              |             |              |              |              |              |
| 31 |           |             |             | 150.81       |              |             |              |              |              | 42.02        |
| 32 | Gabon     | 65 (54 to   | 163 (134 to | (132.67 to   | 4 (2 to 6)   | 5 (4 to 8)  | 52.52 (-4.74 | 144 (85 to   | 205 (137 to  | (-13.99 to   |
| 33 |           | 80)         | 201)        | 173.19)      |              |             | to 134.04)   | 223)         | 294)         | 140.73)      |
| 34 |           |             |             |              |              |             |              |              |              |              |
| 35 |           |             |             | 162.91       |              |             |              |              |              |              |
| 36 | Gambia    | 49 (39 to   | 130 (105 to | (142.17 to   | 3 (1 to 5)   | 5 (3 to 7)  | 85.18 (3.78  | 132 (63 to   | 215 (140 to  | 62.69 (-6.86 |
| 37 |           | 60)         | 161)        | 186.15)      |              |             | to 214.51)   | 243)         | 298)         | to 192.83)   |
| 38 |           |             |             |              |              |             |              |              |              |              |
| 39 |           |             |             | -17.45       |              |             |              |              |              | -18.96       |
| 40 | Georgia   | 5100 (4308  | 4210 (3545  | (-22.85 to   | 16 (10 to    | 17 (10 to   | 3.41 (-22.82 | 1222 (911 to | 991 (741 to  | (-30.33 to   |
| 41 |           | to 6037)    | to 5060)    | -11.71)      | 22)          | 22)         | to 40.33)    | 1581)        | 1269)        | -5.81)       |
| 42 |           |             |             |              |              |             |              |              |              |              |
| 43 |           | 101153      | 236048      | 133.36       | 1201 (987 to | 4286 (3156  | 256.72       | 37493        | 92002        | 145.38       |
| 44 | Germany   | (87240 to   | (208508 to  | (115.87 to   | 2011)        | to 4903)    | (63.30 to    | (30500 to    | (74718 to    | (51.12 to    |
| 45 |           | 117946)     | 266966)     | 150.36)      |              |             | 351.66)      | 51704)       | 107721)      | 187.04)      |
| 46 |           |             |             |              |              |             |              |              |              |              |
| 47 |           |             |             | 194.61       |              |             |              |              |              |              |
| 48 | Ghana     | 982 (800 to | 2894 (2355  | (176.45 to   | 56 (24 to    | 103 (57 to  | 84.24 (5.66  | 2633 (1097   | 4506 (2554   | 71.16 (2.12  |
| 49 |           | 1189)       | to 3533)    | 216.26)      | 95)          | 155)        | to 242.87)   | to 4201)     | to 6654)     | to 227.26)   |
| 50 |           |             |             |              |              |             |              |              |              |              |
| 51 |           | 12180       | 10403 (9422 | -14.59       |              |             |              |              |              |              |
| 52 | Greece    | (10236 to   | to 11537)   | (-23.98 to   | 35 (30 to    | 66 (54 to   | 86.77 (51.57 | 2407 (1790   | 2424 (1911   | 0.69 (-13.02 |
| 53 |           | 14240)      |             | -3.38)       | 40)          | 80)         | to 131.14)   | to 3170)     | to 3027)     | to 15.85)    |
| 54 |           |             |             |              |              |             |              |              |              |              |
| 55 | Greenland | 78 (64 to   | 108 (92 to  | 39.24 (25.78 | 0 (0 to 0)   | 0 (0 to 1)  | 147.84       | 17 (13 to    | 25 (19 to    | 49.12 (13.65 |
| 56 |           | 92)         | 125)        | to 55.52)    |              |             | (18.45 to    | 23)          | 33)          | to 82.39)    |
| 57 |           |             |             |              |              |             |              |              |              |              |
| 58 |           |             |             |              |              |             |              |              |              |              |
| 59 | Grenada   | 16 (13 to   | 28 (23 to   | 76.27 (60.87 | 1 (1 to 1)   | 1 (1 to 2)  | 29.20 (-4.73 | 33 (27 to    | 43 (36 to    | 30.86 (1.58  |
| 60 |           | 19)         | 35)         | to 93.49)    |              |             | to 79.53)    | 39)          | 52)          | to 68.87)    |

|    |                            |                           |                           |                           |                     |                     |                          |                          |                           |                          |
|----|----------------------------|---------------------------|---------------------------|---------------------------|---------------------|---------------------|--------------------------|--------------------------|---------------------------|--------------------------|
| 1  |                            |                           |                           |                           |                     |                     | 21.60                    |                          |                           |                          |
| 2  |                            |                           |                           |                           |                     |                     |                          |                          |                           |                          |
| 3  |                            |                           |                           |                           |                     |                     |                          |                          |                           |                          |
| 4  |                            |                           |                           |                           |                     |                     |                          |                          |                           |                          |
| 5  | Guam                       | 8 (6 to 9)                | 12 (10 to 14)             | 49.19 (36.21 to 64.35)    | 0 (0 to 0)          | 0 (0 to 0)          | (-20.17 to 84.57)        | 9 (7 to 12)              | 9 (7 to 13)               | 2.91 (-31.52 to 53.3)    |
| 6  |                            |                           |                           |                           |                     |                     |                          |                          |                           |                          |
| 7  |                            |                           |                           |                           |                     |                     |                          |                          |                           |                          |
| 8  |                            |                           |                           |                           |                     |                     |                          |                          |                           |                          |
| 9  | Guatemala                  | 1041 (867 to 1243)        | 3192 (2680 to 3791)       | 206.76 (185.26 to 227.66) | 13 (8 to 22)        | 35 (27 to 45)       | 180.16 (34.43 to 377.94) | 866 (522 to 1506)        | 1761 (1381 to 2210)       | 103.35 (6.31 to 246.71)  |
| 10 |                            |                           |                           |                           |                     |                     |                          |                          |                           |                          |
| 11 |                            |                           |                           |                           |                     |                     |                          |                          |                           |                          |
| 12 | Guinea                     | 309 (251 to 384)          | 677 (543 to 826)          | 119.23 (103.12 to 138.21) | 19 (6 to 34)        | 29 (14 to 46)       | 49.62 (-7.31 to 159.78)  | 1008 (272 to 2032)       | 1414 (609 to 2445)        | 40.38 (-20.12 to 170.29) |
| 13 |                            |                           |                           |                           |                     |                     |                          |                          |                           |                          |
| 14 |                            |                           |                           |                           |                     |                     |                          |                          |                           |                          |
| 15 |                            |                           |                           |                           |                     |                     |                          |                          |                           |                          |
| 16 | Guinea-Bissau              | 44 (36 to 54)             | 103 (83 to 126)           | 134.63 (116.21 to 153.25) | 4 (2 to 7)          | 6 (3 to 8)          | 39.91 (-18.84 to 175.43) | 201 (66 to 403)          | 265 (152 to 392)          | 31.85 (-30.36 to 186.15) |
| 17 |                            |                           |                           |                           |                     |                     |                          |                          |                           |                          |
| 18 |                            |                           |                           |                           |                     |                     |                          |                          |                           |                          |
| 19 |                            |                           |                           |                           |                     |                     |                          |                          |                           |                          |
| 20 | Guyana                     | 126 (103 to 152)          | 170 (139 to 210)          | 35.00 (24.45 to 45.80)    | 5 (4 to 6)          | 6 (5 to 9)          | 20.04 (-18.42 to 74.53)  | 239 (189 to 291)         | 257 (191 to 336)          | 7.22 (-25.07 to 53.03)   |
| 21 |                            |                           |                           |                           |                     |                     |                          |                          |                           |                          |
| 22 |                            |                           |                           |                           |                     |                     |                          |                          |                           |                          |
| 23 |                            |                           |                           |                           |                     |                     |                          |                          |                           |                          |
| 24 | Haiti                      | 860 (708 to 1057)         | 1916 (1570 to 2384)       | 122.68 (105.23 to 142.3)  | 58 (24 to 105)      | 85 (45 to 125)      | 45.78 (-11 to 148.4)     | 3030 (946 to 6879)       | 3782 (1875 to 6104)       | 24.85 (-33.53 to 156.75) |
| 25 |                            |                           |                           |                           |                     |                     |                          |                          |                           |                          |
| 26 |                            |                           |                           |                           |                     |                     |                          |                          |                           |                          |
| 27 |                            |                           |                           |                           |                     |                     |                          |                          |                           |                          |
| 28 | Honduras                   | 619 (513 to 734)          | 1803 (1499 to 2141)       | 191.20 (171.74 to 211.20) | 22 (14 to 31)       | 50 (31 to 69)       | 128.99 (47.94 to 251.69) | 1240 (712 to 1929)       | 1816 (1191 to 2508)       | 46.37 (-11.95 to 139.27) |
| 29 |                            |                           |                           |                           |                     |                     |                          |                          |                           |                          |
| 30 |                            |                           |                           |                           |                     |                     |                          |                          |                           |                          |
| 31 |                            |                           |                           |                           |                     |                     |                          |                          |                           |                          |
| 32 | Hungary                    | 24215 (21977 to 26809)    | 42233 (39099 to 45377)    | 74.41 (64.26 to 86.04)    | 84 (76 to 109)      | 100 (80 to 128)     | 19.27 (-4.55 to 45.83)   | 5849 (4647 to 7201)      | 8339 (6257 to 10544)      | 42.56 (25.99 to 56.19)   |
| 33 |                            |                           |                           |                           |                     |                     |                          |                          |                           |                          |
| 34 |                            |                           |                           |                           |                     |                     |                          |                          |                           |                          |
| 35 |                            |                           |                           |                           |                     |                     |                          |                          |                           |                          |
| 36 | Iceland                    | 357 (301 to 420)          | 872 (752 to 1007)         | 144.33 (123.25 to 167.58) | 2 (2 to 2)          | 4 (3 to 5)          | 107.81 (52.43 to 151.5)  | 90 (71 to 113)           | 187 (142 to 239)          | 107.79 (81.26 to 131.98) |
| 37 |                            |                           |                           |                           |                     |                     |                          |                          |                           |                          |
| 38 |                            |                           |                           |                           |                     |                     |                          |                          |                           |                          |
| 39 | India                      | 133927 (107800 to 166434) | 270719 (219873 to 332264) | 102.14 (95.94 to 110.29)  | 2770 (1783 to 3802) | 4214 (2950 to 5531) | 52.13 (19.29 to 98.65)   | 127568 (77798 to 169843) | 164416 (117527 to 208276) | 28.89 (1.40 to 72.21)    |
| 40 |                            |                           |                           |                           |                     |                     |                          |                          |                           |                          |
| 41 |                            |                           |                           |                           |                     |                     |                          |                          |                           |                          |
| 42 |                            |                           |                           |                           |                     |                     |                          |                          |                           |                          |
| 43 | Indonesia                  | 5025 (3974 to 6141)       | 11410 (9158 to 13704)     | 127.09 (115.15 to 141.04) | 704 (401 to 910)    | 913 (582 to 1179)   | 29.58 (2.63 to 76.95)    | 26026 (16965 to 34445)   | 24943 (18268 to 32252)    | -4.16 (-31.91 to 42.06)  |
| 44 |                            |                           |                           |                           |                     |                     |                          |                          |                           |                          |
| 45 |                            |                           |                           |                           |                     |                     |                          |                          |                           |                          |
| 46 | Iran (Islamic Republic of) | 14964 (12153 to 18513)    | 40493 (32952 to 49751)    | 170.60 (160.28 to 181.00) | 51 (33 to 68)       | 132 (55 to 164)     | 158.02 (43.67 to 247.65) | 4022 (3121 to 5103)      | 9481 (6679 to 12439)      | 135.71 (84.19 to 177.03) |
| 47 |                            |                           |                           |                           |                     |                     |                          |                          |                           |                          |
| 48 |                            |                           |                           |                           |                     |                     |                          |                          |                           |                          |
| 49 |                            |                           |                           |                           |                     |                     |                          |                          |                           |                          |
| 50 |                            |                           |                           |                           |                     |                     |                          |                          |                           |                          |
| 51 | Iraq                       | 2270 (1890 to 2694)       | 10029 (8221 to 12199)     | 341.76 (303.6 to 377.49)  | 34 (21 to 51)       | 51 (38 to 67)       | 52.37 (-14.19 to 162.33) | 2135 (1267 to 3447)      | 3719 (2808 to 4931)       | 74.13 (2.20 to 190.75)   |
| 52 |                            |                           |                           |                           |                     |                     |                          |                          |                           |                          |
| 53 |                            |                           |                           |                           |                     |                     |                          |                          |                           |                          |
| 54 | Ireland                    | 3253 (2736 to 3869)       | 5762 (4988 to 6655)       | 77.13 (58.69 to 97.43)    | 33 (29 to 37)       | 51 (41 to 65)       | 53.61 (25.28 to 93.62)   | 1106 (922 to 1332)       | 1623 (1294 to 2033)       | 46.76 (29.96 to 67.57)   |
| 55 |                            |                           |                           |                           |                     |                     |                          |                          |                           |                          |
| 56 |                            |                           |                           |                           |                     |                     |                          |                          |                           |                          |
| 57 | Israel                     | 3274 (2767 to 3882)       | 6640 (5924 to 7451)       | 102.78 (76.8 to 132.02)   | 22 (18 to 24)       | 46 (38 to 63)       | 111.01 (70.80 to 199.17) | 1000 (812 to 1229)       | 1851 (1484 to 2306)       | 85.14 (61.05 to 116.46)  |
| 58 |                            |                           |                           |                           |                     |                     |                          |                          |                           |                          |
| 59 |                            |                           |                           |                           |                     |                     |                          |                          |                           |                          |
| 60 |                            |                           |                           |                           |                     |                     |                          |                          |                           |                          |



|    |              |             |             |              |              |              |              |              |              |              |
|----|--------------|-------------|-------------|--------------|--------------|--------------|--------------|--------------|--------------|--------------|
| 1  |              |             |             |              |              |              |              |              |              |              |
| 2  |              |             |             |              |              |              |              |              |              |              |
| 3  |              | 183929      | 186447      |              |              |              | 272.23       | 33890        | 44427        |              |
| 4  | Italy        | (159353 to  | (165268 to  | 1.37 (-2.84  | 351 (310 to  | 1305 (944 to | (70.52 to    | (24913 to    | (34629 to    | 31.09 (5.26  |
| 5  |              | 209220)     | 209019)     | to 6.10)     | 581)         | 1468)        | 339.63)      | 43884)       | 54814)       | to 46.90)    |
| 6  |              |             |             |              |              |              |              |              |              |              |
| 7  |              |             |             |              |              |              | 21.88        |              |              | 12.67        |
| 8  | Jamaica      | 543 (455 to | 884 (737 to | 62.81 (49.97 | 6 (4 to 7)   | 7 (5 to 10)  | (-16.58 to   | 304 (231 to  | 343 (264 to  | (-13.90 to   |
| 9  |              | 648)        | 1059)       | to 76.46)    |              |              | 110.45)      | 367)         | 432)         | 66.78)       |
| 10 |              |             |             |              |              |              |              |              |              |              |
| 11 |              | 236120      | 408632      |              |              |              |              | 41769        | 67424        |              |
| 12 | Japan        | (196281 to  | (353858 to  | 73.06 (59.11 | 367 (270 to  | 452 (350 to  | 23.32 (1.39  | (30062 to    | (46877 to    | 61.42 (48.32 |
| 13 |              | 281825)     | 468152)     | to 88.73)    | 394)         | 629)         | to 112.57)   | 56026)       | 91495)       | to 75.54)    |
| 14 |              |             |             |              |              |              |              |              |              |              |
| 15 |              |             |             | 614.12       |              |              | 135.70       |              |              | 376.81       |
| 16 | Jordan       | 1611 (1394  | 11508 (9646 | (540.91 to   | 6 (4 to 8)   | 13 (10 to    | (49.91 to    | 452 (339 to  | 2155 (1536   | (274.79 to   |
| 17 |              | to 1851)    | to 13565)   | 683.77)      |              | 17)          | 281.75)      | 570)         | to 2953)     | 495.45)      |
| 18 |              |             |             |              |              |              |              |              |              |              |
| 19 |              |             | 15823       |              |              |              |              |              |              |              |
| 20 | Kazakhstan   | 11689 (9797 | (13219 to   | 35.36 (26.10 | 76 (56 to    | 82 (66 to    | 7.52 (-17.29 | 4458 (3567   | 5172 (4164   | 16.03 (-1.28 |
| 21 |              | to 14063)   | 18930)      | to 46.10)    | 95)          | 100)         | to 48.48)    | to 5515)     | to 6466)     | to 37.13)    |
| 22 |              |             |             |              |              |              |              |              |              |              |
| 23 |              |             |             | 230.72       |              |              | 144.03       |              |              |              |
| 24 | Kenya        | 868 (711 to | 2870 (2364  | (219.85 to   | 74 (46 to    | 180 (111 to  | (82.74 to    | 3011 (1930   | 6453 (4376   | 114.3 (40.66 |
| 25 |              | 1056)       | to 3474)    | 242.5)       | 125)         | 265)         | 228.15)      | to 4593)     | to 9370)     | to 213.60)   |
| 26 |              |             |             |              |              |              |              |              |              |              |
| 27 | Kiribati     | 2 (2 to 3)  | 4 (3 to 4)  | 60.33 (46.38 | 1 (0 to 1)   | 1 (0 to 1)   | 5.25 (-33.24 | 28 (11 to    | 30 (14 to    | 4.10 (-35.53 |
| 28 |              |             |             | to 76.77)    |              |              | to 73.45)    | 58)          | 55)          | to 92.08)    |
| 29 |              |             |             |              |              |              |              |              |              |              |
| 30 |              |             |             | 230.91       |              |              | 195.71       |              |              | 197.49       |
| 31 | Kuwait       | 863 (798 to | 2857 (2338  | (174.37 to   | 1 (1 to 2)   | 4 (3 to 5)   | (125.48 to   | 188 (140 to  | 558 (391 to  | (143.44 to   |
| 32 |              | 937)        | to 3483)    | 298.63)      |              |              | 314.39)      | 241)         | 755)         | 262.68)      |
| 33 |              |             |             |              |              |              |              |              |              |              |
| 34 |              |             |             |              |              |              | -36.11       |              |              | -7.05        |
| 35 | Kyrgyzstan   | 2526 (2126  | 4283 (3592  | 69.58 (59.46 | 15 (10 to    | 10 (8 to 12) | (-51.26 to   | 1109 (784 to | 1031 (789 to | (-27.91 to   |
| 36 |              | to 3008)    | to 5083)    | to 81.49)    | 19)          |              | 14.99)       | 1376)        | 1325)        | 29.99)       |
| 37 |              |             |             |              |              |              |              |              |              |              |
| 38 | Lao People's | 90 (70 to   | 241 (191 to | 167.27       |              |              | 8.81 (-34.31 | 385 (177 to  | 387 (234 to  | 0.50 (-45.77 |
| 39 | Democratic   | 113)        | 300)        | (144.93 to   | 10 (5 to 15) | 11 (6 to 17) | to 91.32)    | 639)         | 610)         | to 106.92)   |
| 40 | Republic     |             |             | 193.03)      |              |              |              |              |              |              |
| 41 |              |             |             |              |              |              |              |              |              |              |
| 42 | Latvia       | 3273 (2810  | 3226 (2843  | -1.44 (-8.09 | 12 (10 to    | 14 (11 to    | 18.35 (-5.77 | 811 (632 to  | 779 (605 to  | -4.01        |
| 43 |              | to 3770)    | to 3623)    | to 5.70)     | 14)          | 17)          | to 47.79)    | 1017)        | 981)         | (-15.43 to   |
| 44 |              |             |             |              |              |              |              |              |              | 8.10)        |
| 45 |              |             |             | 182.89       |              |              | 146.92       |              |              | 148.06       |
| 46 | Lebanon      | 881 (721 to | 2494 (2037  | (160.10 to   | 3 (2 to 4)   | 8 (4 to 12)  | (25.25 to    | 220 (161 to  | 545 (394 to  | (90.21 to    |
| 47 |              | 1091)       | to 3050)    | 205.97)      |              |              | 359.10)      | 297)         | 737)         | 219.00)      |
| 48 |              |             |             |              |              |              |              |              |              |              |
| 49 |              |             |             |              |              |              | 51.75        |              |              | 46.51        |
| 50 | Lesotho      | 95 (78 to   | 150 (122 to | 58.00 (46.76 | 6 (4 to 8)   | 9 (6 to 12)  | (-12.69 to   | 222 (137 to  | 326 (210 to  | (-15.14 to   |
| 51 |              | 115)        | 185)        | to 69.06)    |              |              | 142.65)      | 323)         | 480)         | 129.83)      |
| 52 |              |             |             |              |              |              |              |              |              |              |
| 53 |              |             |             | 176.51       |              |              | 46.34        |              |              | 35.96        |
| 54 | Liberia      | 104 (85 to  | 288 (233 to | (154.41 to   | 7 (3 to 12)  | 11 (6 to 17) | (-18.23 to   | 360 (108 to  | 490 (271 to  | (-36.97 to   |
| 55 |              | 129)        | 354)        | 199.50)      |              |              | 235.23)      | 705)         | 833)         | 268.26)      |
| 56 |              |             |             |              |              |              |              |              |              |              |
| 57 |              |             |             | 203.80       |              |              | 159.15       |              |              | 160.02       |
| 58 | Libya        | 629 (514 to | 1910 (1557  | (175.90 to   | 4 (3 to 7)   | 11 (7 to 15) | (33.45 to    | 229 (166 to  | 595 (436 to  | (65.02 to    |
| 59 |              | 759)        | to 2333)    | 233.83)      |              |              | 345.08)      | 324)         | 782)         | 262.55)      |
| 60 |              |             |             |              |              |              |              |              |              |              |



|    |                                  |                        |                        |                         |                  |                  |                         |                      |                        |                          |
|----|----------------------------------|------------------------|------------------------|-------------------------|------------------|------------------|-------------------------|----------------------|------------------------|--------------------------|
| 1  |                                  |                        |                        |                         |                  |                  |                         |                      |                        |                          |
| 2  |                                  |                        |                        |                         |                  |                  |                         |                      |                        |                          |
| 3  |                                  |                        |                        |                         |                  |                  |                         |                      |                        |                          |
| 4  | Lithuania                        | 4535 (3980 to 5145)    | 4848 (4481 to 5210)    | 6.90 (-3.51 to 20.95)   | 14 (10 to 16)    | 18 (14 to 23)    | 26.29 (-2.24 to 67.72)  | 1054 (817 to 1321)   | 1105 (861 to 1375)     | 4.77 (-8.66 to 20.85)    |
| 5  |                                  |                        |                        |                         |                  |                  | 124.41                  |                      |                        |                          |
| 6  |                                  |                        |                        |                         |                  |                  |                         |                      |                        |                          |
| 7  | Luxembourg                       | 775 (680 to 879)       | 1503 (1318 to 1707)    | 93.98 (81.65 to 107.23) | 5 (4 to 6)       | 11 (8 to 13)     | (55.78 to 172.33)       | 202 (162 to 247)     | 376 (297 to 471)       | 85.81 (59.15 to 105.40)  |
| 8  |                                  |                        |                        |                         |                  |                  |                         |                      |                        |                          |
| 9  |                                  |                        |                        |                         |                  |                  |                         |                      |                        |                          |
| 10 |                                  |                        |                        | 171.16                  |                  |                  |                         |                      |                        | 60.01                    |
| 11 | Madagascar                       | 490 (401 to 604)       | 1330 (1089 to 1651)    | (153.22 to 190.88)      | 36 (17 to 60)    | 69 (48 to 103)   | 92.10 (5.72 to 331.04)  | 1875 (646 to 3722)   | 3000 (2035 to 4374)    | (-23.07 to 329.63)       |
| 12 |                                  |                        |                        |                         |                  |                  |                         |                      |                        |                          |
| 13 |                                  |                        |                        | 120.33                  |                  |                  |                         |                      |                        |                          |
| 14 |                                  |                        |                        |                         |                  |                  | 39.48                   |                      |                        |                          |
| 15 | Malawi                           | 336 (273 to 415)       | 741 (603 to 910)       | (105.3 to 136.64)       | 39 (19 to 76)    | 55 (38 to 78)    | (-33.91 to 218.89)      | 2236 (716 to 5491)   | 2323 (1541 to 3545)    | 3.89 (-57.34 to 225.03)  |
| 16 |                                  |                        |                        |                         |                  |                  |                         |                      |                        |                          |
| 17 |                                  |                        |                        | 239.19                  |                  |                  |                         |                      |                        |                          |
| 18 |                                  |                        |                        |                         |                  |                  | 157.56                  |                      |                        | 134.26                   |
| 19 | Malaysia                         | 638 (533 to 747)       | 2165 (1879 to 2498)    | (213.74 to 272.55)      | 16 (13 to 20)    | 41 (30 to 56)    | (64.69 to 265.74)       | 612 (503 to 742)     | 1434 (1090 to 1814)    | (68.55 to 208.48)        |
| 20 |                                  |                        |                        |                         |                  |                  |                         |                      |                        |                          |
| 21 |                                  |                        |                        | 357.26                  |                  |                  |                         |                      |                        | 58.10                    |
| 22 |                                  |                        |                        |                         |                  |                  |                         |                      |                        |                          |
| 23 | Maldives                         | 6 (5 to 7)             | 27 (21 to 33)          | (319.05 to 402.53)      | 0 (0 to 1)       | 1 (1 to 1)       | 97.39 (13.04 to 268.14) | 19 (10 to 33)        | 29 (23 to 38)          | (-20.10 to 218.81)       |
| 24 |                                  |                        |                        |                         |                  |                  |                         |                      |                        |                          |
| 25 |                                  |                        |                        | 161.12                  |                  |                  |                         |                      |                        |                          |
| 26 |                                  |                        |                        |                         |                  |                  |                         |                      |                        |                          |
| 27 | Mali                             | 396 (321 to 489)       | 1033 (841 to 1256)     | (141.84 to 182.05)      | 29 (9 to 53)     | 55 (26 to 93)    | 90.14 (10.52 to 338.68) | 1569 (384 to 3318)   | 2748 (1107 to 5138)    | 75.21 (-6.44 to 320.25)  |
| 28 |                                  |                        |                        |                         |                  |                  |                         |                      |                        |                          |
| 29 |                                  |                        |                        |                         |                  |                  | 182.23                  |                      |                        |                          |
| 30 |                                  |                        |                        |                         |                  |                  |                         |                      |                        |                          |
| 31 | Malta                            | 275 (237 to 318)       | 390 (346 to 441)       | 42.03 (32.40 to 52.30)  | 2 (2 to 2)       | 6 (5 to 7)       | (117.73 to 248.53)      | 84 (68 to 102)       | 149 (123 to 178)       | 77.16 (51.73 to 106.18)  |
| 32 |                                  |                        |                        |                         |                  |                  |                         |                      |                        |                          |
| 33 |                                  |                        |                        |                         |                  |                  | 14.19                   |                      |                        | 15.49                    |
| 34 | Marshall Islands                 | 1 (1 to 1)             | 2 (2 to 3)             | 81.58 (65.63 to 99.90)  | 0 (0 to 0)       | 0 (0 to 0)       | (-33.41 to 79.45)       | 10 (6 to 17)         | 12 (6 to 20)           | (-36.36 to 90.92)        |
| 35 |                                  |                        |                        |                         |                  |                  |                         |                      |                        |                          |
| 36 |                                  |                        |                        | 179.57                  |                  |                  |                         |                      |                        | 16.93                    |
| 37 |                                  |                        |                        |                         |                  |                  | 19.95                   |                      |                        |                          |
| 38 | Mauritania                       | 118 (96 to 144)        | 330 (270 to 405)       | (158.4 to 202.27)       | 8 (4 to 11)      | 9 (6 to 13)      | (-22.88 to 109.37)      | 322 (167 to 487)     | 376 (245 to 543)       | (-28.24 to 120.07)       |
| 39 |                                  |                        |                        |                         |                  |                  |                         |                      |                        |                          |
| 40 |                                  |                        |                        |                         |                  |                  | 176.18                  |                      |                        |                          |
| 41 |                                  |                        |                        |                         |                  |                  |                         |                      |                        |                          |
| 42 | Mauritius                        | 47 (37 to 58)          | 86 (69 to 102)         | 81.67 (65.36 to 99.25)  | 1 (1 to 1)       | 3 (3 to 4)       | (101.94 to 258.21)      | 50 (43 to 61)        | 117 (90 to 147)        | 134.12 (70.2 to 198.45)  |
| 43 |                                  |                        |                        |                         |                  |                  |                         |                      |                        |                          |
| 44 |                                  |                        |                        |                         |                  |                  | 229.87                  |                      |                        | 119.55                   |
| 45 |                                  |                        |                        |                         |                  |                  |                         |                      |                        |                          |
| 46 | Mexico                           | 25697 (21937 to 30082) | 46570 (40040 to 53889) | 81.22 (75.62 to 87.02)  | 157 (142 to 176) | 519 (408 to 622) | (156.16 to 297.06)      | 9626 (8180 to 11411) | 21132 (17386 to 25318) | 119.55 (86.73 to 154.33) |
| 47 |                                  |                        |                        |                         |                  |                  |                         |                      |                        |                          |
| 48 |                                  |                        |                        |                         |                  |                  |                         |                      |                        |                          |
| 49 | Micronesia (Federated States of) | 3 (2 to 4)             | 4 (3 to 5)             | 26.76 (16.02 to 38.96)  | 1 (0 to 1)       | 1 (0 to 1)       | (-59.09 to 31.38)       | 28 (16 to 49)        | 20 (10 to 38)          | (-62.97 to 22.93)        |
| 50 |                                  |                        |                        |                         |                  |                  |                         |                      |                        |                          |
| 51 |                                  |                        |                        |                         |                  |                  |                         |                      |                        |                          |
| 52 |                                  |                        |                        |                         |                  |                  |                         |                      |                        |                          |
| 53 | Monaco                           | 43 (36 to 51)          | 59 (50 to 69)          | 37.31 (28.37 to 47.29)  | 0 (0 to 0)       | 0 (0 to 1)       | 37.96 (-4.38 to 94.10)  | 11 (8 to 14)         | 14 (11 to 18)          | 30.63 (10.51 to 53.62)   |
| 54 |                                  |                        |                        |                         |                  |                  |                         |                      |                        |                          |
| 55 |                                  |                        |                        | 142.14                  |                  |                  |                         |                      |                        | 17.92                    |
| 56 | Mongolia                         | 961 (801 to 1153)      | 2328 (1907 to 2810)    | (124.80 to 161.08)      | 11 (6 to 15)     | 12 (9 to 16)     | (-26.46 to 89.38)       | 690 (380 to 1073)    | 814 (620 to 1028)      | (-26.45 to 100.76)       |
| 57 |                                  |                        |                        |                         |                  |                  |                         |                      |                        |                          |
| 58 |                                  |                        |                        |                         |                  |                  |                         |                      |                        |                          |
| 59 | Montenegro                       | 879 (744 to 1051)      | (890 to 1051)          | 19.54 (12.1 to 26.98)   | 2 (1 to 2)       | 3 (2 to 3)       | 48.81 (1.77 to 96.45)   | 191 (145 to 247)     | 221 (165 to 277)       | 15.74 (1.68 to 29.80)    |
| 60 |                                  |                        |                        |                         |                  |                  |                         |                      |                        |                          |

|    |                 |              |              |              |              |             |               |              |             |              |
|----|-----------------|--------------|--------------|--------------|--------------|-------------|---------------|--------------|-------------|--------------|
| 1  |                 |              |              |              |              |             |               |              |             |              |
| 2  |                 |              |              |              |              |             |               |              |             |              |
| 3  |                 | 1032)        | 1240)        | to 27.53)    |              | to 101.73)  | 247)          | 288)         | to 30.37)   |              |
| 4  |                 |              |              | 119.98       |              |             |               |              |             |              |
| 5  |                 | 3007 (2487   | 6614 (5488   | (105.44 to   | 31 (19 to    | 59 (41 to   | 91.82 (30.18  | 1438 (989 to | 2615 (1988  | 81.81 (30.04 |
| 6  | Morocco         | to 3582)     | to 7909)     | 135.91)      | 48)          | 77)         | to 192.53)    | 2101)        | to 3373)    | to 139.60)   |
| 7  |                 |              |              |              |              |             |               |              |             |              |
| 8  |                 |              |              | 128.31       |              |             | 107.07        |              |             | 75.44        |
| 9  |                 | 487 (397 to  | 1111 (897 to | (112.18 to   | 52 (30 to    | 107 (71 to  | (16.28 to     | 2567 (1058   | 4503 (2907  | (-18.50 to   |
| 10 | Mozambique      | 601)         | 1347)        | 146.62)      | 88)          | 154)        | 270.37)       | to 5668)     | to 7196)    | 319.21)      |
| 11 |                 |              |              |              |              |             |               |              |             |              |
| 12 |                 |              |              | 101.31       |              |             | -0.68         |              |             | -19.94       |
| 13 |                 | 1024 (797 to | 2062 (1656   | (83.73 to    | 60 (34 to    | 59 (44 to   | (-40.07 to    | 2820 (1386   | 2258 (1680  | (-57.94 to   |
| 14 | Myanmar         | 1272)        | to 2558)     | 120.83)      | 95)          | 82)         | 64.77)        | to 5128)     | to 3215)    | 48.65)       |
| 15 |                 |              |              |              |              |             |               |              |             |              |
| 16 |                 |              |              | 148.34       |              |             | 61.81 (0.64   | 218 (129 to  | 333 (223 to | 52.64        |
| 17 |                 | 87 (72 to    | 217 (175 to  | (130.13 to   | 6 (4 to 8)   | 9 (6 to 13) | to 190.79)    | 344)         | 498)        | (-12.57 to   |
| 18 | Namibia         | 108)         | 268)         | 167.81)      |              |             |               |              |             | 213.41)      |
| 19 |                 |              |              |              |              |             |               |              |             |              |
| 20 |                 |              |              | 12.57 (3.45  |              |             | -34.79        |              |             | -34.16       |
| 21 |                 | 0 (0 to 0)   | 0 (0 to 0)   | to 21.62)    | 0 (0 to 0)   | 0 (0 to 0)  | (-63.12 to    | 3 (1 to 6)   | 2 (1 to 4)  | (-60.95 to   |
| 22 | Nauru           |              |              |              |              |             | 6.11)         |              |             | 18.41)       |
| 23 |                 |              |              |              |              |             |               |              |             |              |
| 24 |                 |              |              | 131.04       |              |             | 23.09         |              |             |              |
| 25 |                 | 2180 (1726   | 5036 (4049   | (112.62 to   | 93 (56 to    | 115 (71 to  | (-15.11 to    | 3780 (2183   | 3819 (2683  | 1.05 (-34.25 |
| 26 | Nepal           | to 2758)     | to 6194)     | 151.30)      | 165)         | 190)        | 93.10)        | to 5903)     | to 5781)    | to 65.01)    |
| 27 |                 |              |              |              |              |             |               |              |             |              |
| 28 |                 | 24401        | 16251        | -33.4        |              |             | 180.66        |              | 12100       |              |
| 29 |                 | (22175 to    | (13975 to    | (-41.14 to   | 278 (240 to  | 782 (582 to | (78.32 to     | 8234 (6818   | (10246 to   | 46.95 (10.86 |
| 30 | Netherlands     | 26704)       | 18987)       | -24.18)      | 344)         | 906)        | 230.31)       | to 9979)     | 13731)      | to 70.21)    |
| 31 |                 |              |              |              |              |             |               |              |             |              |
| 32 |                 | 5873 (5089   | 8600 (7850   | 46.45 (37.95 | 20 (17 to    | 31 (26 to   | 58.14 (32.29  | 1267 (976 to | 1758 (1327  | 38.84 (26.73 |
| 33 | New Zealand     | to 6670)     | to 9491)     | to 57.06)    | 22)          | 39)         | to 109.75)    | 1592)        | to 2254)    | to 54.82)    |
| 34 |                 |              |              |              |              |             |               |              |             |              |
| 35 |                 | 500 (414 to  | 1453 (1218   | 190.37       |              |             | 177.21        |              |             | 137.59       |
| 36 | Nicaragua       | 598)         | to 1720)     | (167.53 to   | 3 (2 to 3)   | 7 (6 to 9)  | (99.51 to     | 187 (149 to  | 444 (340 to | (85.21 to    |
| 37 |                 |              |              | 212.17)      |              |             | 267.74)       | 245)         | 555)        | 192.36)      |
| 38 |                 |              |              |              |              |             |               |              |             |              |
| 39 |                 | 321 (256 to  | 942 (760 to  | 193.63       |              |             | 106.00        |              |             |              |
| 40 | Niger           | 395)         | 1154)        | (171.22 to   | 27 (9 to 54) | 55 (26 to   | (18.53 to     | 1564 (379 to | 2835 (1120  | 81.21 (-7.73 |
| 41 |                 |              |              | 216.83)      |              | 95)         | 313.02)       | 3724)        | to 5521)    | to 318.21)   |
| 42 |                 |              |              |              |              |             |               |              |             |              |
| 43 |                 | 5162 (4259   | 14578        | 182.41       |              |             | 78.53 (23.85  | 15139 (7194  | 26794       | 76.98 (13.30 |
| 44 | Nigeria         | to 6269)     | (11955 to    | (176.97 to   | 314 (165 to  | 560 (306 to | to 168.11)    | to 24017)    | (15017 to   | to 185.01)   |
| 45 |                 |              | 17708)       | 187.98)      | 514)         | 909)        |               |              | 42474)      |              |
| 46 |                 |              |              |              |              |             |               |              |             |              |
| 47 |                 |              |              | -12.86       |              |             | -42.22        |              |             | -45.91       |
| 48 |                 | 0 (0 to 0)   | 0 (0 to 0)   | (-20.01 to   | 0 (0 to 0)   | 0 (0 to 0)  | (-65.13 to    | 1 (0 to 1)   | 0 (0 to 1)  | (-68.37 to   |
| 49 | Niue            |              |              | -3.97)       |              |             | -10.86)       |              |             | -8.78)       |
| 50 |                 |              |              |              |              |             |               |              |             |              |
| 51 |                 | 2473 (2098   | 3374 (2855   | 36.41 (27.51 |              |             | 37.22 (1.2 to | 490 (358 to  | 635 (459 to | 29.55 (14.26 |
| 52 | North Macedonia | to 2927)     | to 3973)     | to 46.86)    | 4 (3 to 4)   | 5 (3 to 6)  | 83.42)        | 648)         | 844)        | to 46.45)    |
| 53 | Northern        |              |              |              |              |             |               |              |             |              |
| 54 | Mariana         | 3 (2 to 3)   | 3 (3 to 4)   | 17.67 (3.72  | 0 (0 to 0)   | 0 (0 to 0)  | (-70.47 to    | 12 (8 to 19) | 5 (4 to 9)  | (-77.38 to   |
| 55 | Islands         |              |              | to 33.96)    |              |             | 26.41)        |              |             | -4.80)       |
| 56 |                 |              |              |              |              |             |               |              |             |              |
| 57 |                 | 20686        | 33097        | 60.00 (50.85 |              |             | 30.65 (17.07  | 3551 (2585   | 5414 (3835  | 52.44 (44.12 |
| 58 | Norway          | (17395 to    | (28492 to    | to 68.77)    | 29 (26 to    | 38 (32 to   | to 54.59)     | to 4687)     | to 7244)    | to 61.59)    |
| 59 |                 | 24323)       | 37859)       |              | 41)          | 55)         |               |              |             |              |
| 60 |                 |              |              |              |              |             |               |              |             |              |

|    |                        |             |             |              |              |              |              |              |              |              |
|----|------------------------|-------------|-------------|--------------|--------------|--------------|--------------|--------------|--------------|--------------|
| 1  |                        |             |             |              |              |              |              |              |              |              |
| 2  |                        |             |             |              |              |              |              |              |              |              |
| 3  |                        |             |             | 265.15       |              |              | 135.73       |              |              | 206.46       |
| 4  | Oman                   | 431 (347 to | 1575 (1266  | (237.03 to   | 2 (1 to 3)   | 4 (3 to 5)   | (37.95 to    | 122 (85 to   | 375 (271 to  | (111.98 to   |
| 5  |                        | 517)        | to 1924)    | 297.09)      |              |              | 331.56)      | 178)         | 496)         | 320.55)      |
| 6  |                        |             |             |              |              |              |              |              |              |              |
| 7  |                        |             | 26815       | 168.59       |              |              |              |              | 27286        |              |
| 8  | Pakistan               | 9984 (7995  | (21768 to   | (154.72 to   | 454 (240 to  | 657 (447 to  | 44.84 (-2.73 | 16234 (9791  | (18727 to    | 68.08 (19.36 |
| 9  |                        | to 12369)   | 33849)      | 184.98)      | 866)         | 993)         | to 133.76)   | to 26748)    | 38379)       | to 148.68)   |
| 10 |                        |             |             |              |              |              |              |              |              |              |
| 11 |                        |             |             |              |              |              | 23.28        |              |              | 14.99        |
| 12 | Palau                  | 1 (1 to 1)  | 1 (1 to 1)  | 58.71 (43.16 | 0 (0 to 0)   | 0 (0 to 0)   | (-26.34 to   | 3 (2 to 7)   | 4 (2 to 6)   | (-29.80 to   |
| 13 |                        |             |             | to 76.15)    |              |              | 101.05)      |              |              | 103.99)      |
| 14 |                        |             |             |              |              |              |              |              |              |              |
| 15 |                        |             |             | 261.47       |              |              | 49.80        |              |              | 142.19       |
| 16 | Palestine              | 374 (305 to | 1351 (1104  | (229.04 to   | 3 (2 to 4)   | 4 (3 to 6)   | (-14.64 to   | 132 (92 to   | 320 (235 to  | (82.43 to    |
| 17 |                        | 450)        | to 1621)    | 293.11)      |              |              |              | 127.75)      | 195)         | 443)         |
| 18 |                        |             |             |              |              |              |              |              |              |              |
| 19 |                        |             |             | 141.92       |              |              | 239.99       |              |              | 129.97       |
| 20 | Panama                 | 553 (471 to | 1338 (1131  | (123.11 to   | 7 (6 to 10)  | 25 (19 to    | (135.70 to   | 436 (347 to  | 1002 (763 to | (65.87 to    |
| 21 |                        | 638)        | to 1560)    | 161.72)      |              |              | 32)          | 373.74)      | 538)         | 1297)        |
| 22 |                        |             |             |              |              |              |              |              |              |              |
| 23 |                        |             |             | 145.64       |              |              |              |              |              |              |
| 24 | Papua New<br>Guinea    | 116 (92 to  | 285 (229 to | (124.56 to   | 13 (7 to 20) | 25 (16 to    | 95.85 (20.41 | 661 (335 to  | 1258 (758 to | 90.40 (5.88  |
| 25 |                        | 140)        | 350)        | 168.38)      |              |              | 38)          | to 222.69)   | 1140)        | 2034)        |
| 26 |                        |             |             |              |              |              |              |              |              |              |
| 27 |                        |             |             |              |              |              | 171.03       |              |              |              |
| 28 | Paraguay               | 996 (853 to | 1956 (1652  | 96.35 (82.38 | 4 (4 to 5)   | 12 (8 to 16) | (73.55 to    | 327 (263 to  | 647 (481 to  | 97.76 (55.83 |
| 29 |                        | 1165)       | to 2324)    | to 111.71)   |              |              |              | 302.03)      | 404)         | 831)         |
| 30 |                        |             |             |              |              |              |              |              |              |              |
| 31 |                        |             |             | 120.79       |              |              | -40.28       |              |              | -62.13       |
| 32 | Peru                   | 2566 (2121  | 5665 (4638  | (105.66 to   | 128 (74 to   | 76 (54 to    | (-66.32 to   | 8234 (3972   | 3118 (2308   | (-79.74 to   |
| 33 |                        | to 3079)    | to 6822)    | 138.38)      | 194)         | 105)         |              | 19.96)       | to 13912)    | to 4194)     |
| 34 |                        |             |             |              |              |              |              |              |              |              |
| 35 |                        |             |             | 145.40       |              |              | 19.59        |              |              |              |
| 36 | Philippines            | 2067 (1630  | 5073 (4044  | (135.48 to   | 98 (54 to    | 117 (95 to   | (-15.39 to   | 3743 (2419   | 4556 (3797   | 21.71 (-7.83 |
| 37 |                        | to 2519)    | to 6166)    | 156.45)      | 125)         | 155)         |              | 149.06)      | to 4551)     | to 5981)     |
| 38 |                        |             |             |              |              |              |              |              |              |              |
| 39 |                        | 177477      | 88307       | -50.24       |              |              |              | 30297        | 20081        | -33.72       |
| 40 | Poland                 | (149170 to  | (77909 to   | (-54.72 to   | 180 (168 to  | 361 (281 to  | 99.98 (43.08 | (21831 to    | (15602 to    | (-41.18 to   |
| 41 |                        | 211629)     | 99826)      | -45.27)      | 211)         | 426)         |              | to 136.68)   | 40254)       | 25064)       |
| 42 |                        |             |             |              |              |              |              |              |              |              |
| 43 |                        |             |             |              |              |              | 277.16       |              |              | 119.87       |
| 44 | Portugal               | 6035 (5365  | 9894 (8866  | 63.94 (50.98 | 81 (72 to    | 306 (158 to  | (96.34 to    | 2425 (2073   | 5332 (3507   | (37.89 to    |
| 45 |                        | to 6750)    | to 11003)   | to 79.42)    | 90)          | 363)         |              | 355.45)      | to 2832)     | to 6256)     |
| 46 |                        |             |             |              |              |              |              |              |              |              |
| 47 |                        |             |             |              |              |              | -9.54        |              |              | -21.63       |
| 48 | Puerto Rico            | 1123 (1058  | 1442 (1320  | 28.41 (21.63 | 20 (15 to    | 18 (13 to    | (-38.39 to   | 755 (589 to  | 592 (456 to  | (-40.46 to   |
| 49 |                        | to 1194)    | to 1565)    | to 35.32)    | 22)          | 28)          |              | 73.14)       | 869)         | 801)         |
| 50 |                        |             |             |              |              |              |              |              |              |              |
| 51 | Qatar                  | 154 (123 to | 1446 (1178  | 838.58       |              |              | 413.11       |              |              | 628.10       |
| 52 |                        | 187)        | to 1746)    | (770.76 to   | 0 (0 to 1)   | 2 (1 to 3)   | (169.07 to   | 41 (29 to    | 296 (205 to  | (423.39 to   |
| 53 |                        |             | 916.51)     |              |              | 853.64)      | 57)          | 412)         |              | 857.49)      |
| 54 |                        |             |             |              |              |              |              |              |              |              |
| 55 | Republic of<br>Korea   | 17167       | 46956       | 173.52       |              |              | -25.35       |              |              | 10.04        |
| 56 |                        | (15174 to   | (44197 to   | (147.67 to   | 313 (143 to  | 234 (183 to  | (-46.63 to   | 9498 (6903   | 10451 (7829  | (-17.52 to   |
| 57 | 19498)                 | 49997)      | 206.09)     | 399)         | 313)         | 58.97)       | to 11454)    | to 13343)    |              | 63.35)       |
| 58 | Republic of<br>Moldova | 3098 (2561  | 3166 (2836  | 2.20 (-11.58 | 17 (14 to    | 18 (14 to    | 4.75 (-16.20 | 1046 (844 to | 999 (820 to  | -4.45        |
| 59 |                        | to 3712)    | to 3521)    | to 19.64)    | 21)          | 21)          | to 31.59)    | 1266)        | 1209)        |              |
| 60 |                        |             |             |              |              |              |              |              |              |              |

|    |                 |              |             |              |              |            |              |              |              |              |
|----|-----------------|--------------|-------------|--------------|--------------|------------|--------------|--------------|--------------|--------------|
| 1  |                 |              |             |              |              |            |              |              |              |              |
| 2  |                 |              |             |              |              |            |              |              |              |              |
| 3  |                 |              |             |              |              |            |              |              |              | 13.21)       |
| 4  |                 |              |             |              |              |            |              |              |              | -17.18       |
| 5  |                 | 17947        | 17043       | -5.04        | 64 (55 to    | 74 (59 to  | 15.86 (-8.37 | 5269 (4206   | 4364 (3404   | -29.98 to    |
| 6  | Romania         | (15104 to    | (15232 to   | (-15.24 to   | 76)          | 93)        | to 45.57)    | to 6540)     | to 5459)     | -2.13)       |
| 7  |                 | 21254)       | 19020)      | 7.37)        |              |            |              |              |              |              |
| 8  |                 |              |             |              |              |            |              |              |              |              |
| 9  | Russian         | 167371       | 170565      | 1.91 (-0.13  | 977 (726 to  | 1257 (1021 | 28.65 (6.46  | 53401        | 56533        | 5.86 (-5.94  |
| 10 | Federation      | (141580 to   | (145182 to  | to 4.04)     | 1128)        | to 1464)   | to 62.61)    | (41640 to    | (46127 to    | to 23.29)    |
| 11 |                 | 195591)      | 199143)     |              |              |            |              | 64977)       | 69324)       |              |
| 12 |                 |              |             |              |              |            |              |              |              |              |
| 13 | Rwanda          | 288 (237 to  | 726 (584 to | 152.30       | 34 (20 to    | 42 (27 to  | 21.96        | 1761 (735 to | 1838 (1153   | 4.34 (-55.16 |
| 14 |                 | 355)         | 888)        | (132.10 to   | 59)          | 62)        | (-36.82 to   | 3717)        | to 3012)     | to 173.20)   |
| 15 |                 |              |             | 172.65)      |              |            | 143.44)      |              |              |              |
| 16 |                 |              |             | 106.61       |              |            |              |              |              | 14.61        |
| 17 | Saint Kitts and | 10 (8 to 12) | 21 (17 to   | (90.32 to    | 1 (1 to 1)   | 1 (1 to 1) | 9.71 (-25.03 | 25 (19 to    | 28 (19 to    | (-24.18 to   |
| 18 | Nevis           |              | 26)         | 126.13)      |              |            | to 72.10)    | 29)          | 41)          | 78.38)       |
| 19 |                 |              |             | 131.09       |              |            |              |              |              |              |
| 20 | Saint Lucia     | 25 (21 to    | 59 (48 to   | (113.96 to   | 1 (1 to 1)   | 1 (1 to 2) | 47.65 (10.86 | 36 (29 to    | 45 (36 to    | 26.50 (-1.54 |
| 21 |                 | 31)          | 72)         | 149.59)      |              |            | to 116.72)   | 41)          | 56)          | to 79.21)    |
| 22 |                 |              |             |              |              |            |              |              |              |              |
| 23 | Saint Vincent   | 20 (16 to    | 32 (26 to   | 63.64 (48.19 | 1 (1 to 1)   | 2 (1 to 2) | 54.50 (13.27 | 39 (32 to    | 49 (40 to    | 27.47 (-3.02 |
| 24 | and the         | 24)          | 39)         | to 80.82)    |              |            | to 112.91)   | 45)          | 62)          | to 72.66)    |
| 25 | Grenadines      |              |             |              |              |            |              |              |              |              |
| 26 |                 |              |             |              |              |            |              |              |              |              |
| 27 |                 |              |             |              |              |            |              |              |              |              |
| 28 |                 |              |             |              |              |            |              |              |              |              |
| 29 | Samoa           | 6 (5 to 8)   | 9 (7 to 10) | 34.52 (23.82 | 1 (1 to 1)   | 1 (1 to 1) | 6.37 (-33.37 | 31 (20 to    | 30 (19 to    | -1.06        |
| 30 |                 |              |             | to 45.98)    |              |            | to 64.06)    | 46)          | 45)          | (-42.04 to   |
| 31 |                 |              |             |              |              |            |              |              |              | 65.39)       |
| 32 |                 |              |             |              |              |            |              |              |              |              |
| 33 | San Marino      | 29 (25 to    | 48 (41 to   | 65.44 (55.11 | 0 (0 to 0)   | 0 (0 to 0) | 167.91       | 6 (4 to 8)   | 10 (8 to 14) | 74.92 (47.44 |
| 34 |                 | 35)          | 57)         | to 76.39)    |              |            | (65.76 to    |              |              | to 111.54)   |
| 35 |                 |              |             |              |              |            | 328.84)      |              |              |              |
| 36 |                 |              |             |              |              |            |              |              |              |              |
| 37 | Sao Tome and    | 8 (6 to 10)  | 18 (15 to   | 135.19       | 0 (0 to 1)   | 0 (0 to 1) | 3.87 (-41.14 | 15 (8 to 24) | 16 (11 to    | 4.71 (-42.23 |
| 38 | Principe        |              | 23)         | (118.79 to   |              |            | to 89.85)    |              | 24)          | to 108.14)   |
| 39 |                 |              |             | 152.91)      |              |            |              |              |              |              |
| 40 |                 |              |             |              |              |            |              |              |              |              |
| 41 | Saudi Arabia    | 3748 (3112   | 13816       | 268.63       | 12 (7 to 20) | 27 (18 to  | 131.24 (9.23 | 1012 (729 to | 3181 (2284   | 214.41       |
| 42 |                 | to 4462)     | (11338 to   | (237.42 to   |              | 38)        | to 337.69)   | 1405)        | to 4376)     | (119.36 to   |
| 43 |                 |              | 16751)      | 301.72)      |              |            |              |              |              | 315.14)      |
| 44 |                 |              |             |              |              |            |              |              |              |              |
| 45 | Senegal         | 366 (298 to  | 930 (756 to | 153.93       | 23 (10 to    | 37 (22 to  | 61.95 (2.65  | 1084 (420 to | 1527 (911 to | 40.90        |
| 46 |                 | 449)         | 1164)       | (136.66 to   | 37)          | 57)        | to 184.83)   | 1912)        | 2378)        | (-20.02 to   |
| 47 |                 |              |             | 171.52)      |              |            |              |              |              | 185.33)      |
| 48 |                 |              |             |              |              |            |              |              |              |              |
| 49 | Serbia          | 12769        | 16638       | 30.30 (20.12 | 49 (37 to    | 113 (74 to | 128.93 (9.06 | 3314 (2528   | 4741 (3595   | 43.04 (-2.81 |
| 50 |                 | (10737 to    | (14322 to   | to 43.95)    | 78)          | 147)       | to 259.34)   | to 4479)     | to 5996)     | to 78.90)    |
| 51 |                 | 14873)       | 19211)      |              |              |            |              |              |              |              |
| 52 |                 |              |             |              |              |            |              |              |              |              |
| 53 | Seychelles      | 3 (2 to 4)   | 6 (5 to 8)  | 117.31       | 0 (0 to 0)   | 0 (0 to 0) | 28.62 (-7.02 | 5 (4 to 7)   | 7 (5 to 9)   | 31.52 (-0.75 |
| 54 |                 |              |             | (99.80 to    |              |            | to 75.47)    |              |              | to 71.15)    |
| 55 |                 |              |             | 136.88)      |              |            |              |              |              |              |
| 56 |                 |              |             |              |              |            |              |              |              |              |
| 57 | Sierra Leone    | 181 (149 to  | 467 (379 to | 158.32       | 11 (4 to 19) | 20 (10 to  | 87.02 (3.04  | 554 (164 to  | 981 (457 to  | 76.91 (-7.60 |
| 58 |                 | 220)         | 582)        | (138.65 to   |              | 32)        | to 331.6)    | 1133)        | 1656)        | to 330.39)   |
| 59 |                 |              |             | 178.83)      |              |            |              |              |              |              |
| 60 | Singapore       | 1615 (1305   | 3179 (2593  | 96.84 (78.98 | 4 (3 to 4)   | 5 (4 to 8) | 39.94 (6.12  | 375 (279 to  | 612 (427 to  | 63.29 (34.14 |

|    |              |             |             |              |              |             |              |              |              |              |
|----|--------------|-------------|-------------|--------------|--------------|-------------|--------------|--------------|--------------|--------------|
| 1  |              |             |             |              |              |             |              |              |              |              |
| 2  |              |             |             |              |              |             |              |              |              |              |
| 3  |              | to 1934)    | to 3962)    | to 116.81)   |              | to 150.34)  | 490)         | 838)         | to 100.87)   |              |
| 4  |              | 9361 (8373  | 10674 (9737 | 14.02 (8.30  | 31 (25 to    | 58 (41 to   | 88.23 (-3.03 | 2274 (1743   | 2856 (2175   | 25.60 (-5.11 |
| 5  | Slovakia     | to 10336)   | to 11684)   | to 20.14)    | 48)          | 76)         | to 176.55)   | to 2989)     | to 3557)     | to 53.77)    |
| 6  |              | 3775 (3318  | 4739 (4282  | 25.55 (17.98 |              | 18 (13 to   | 86.00 (28.56 | 781 (579 to  | 977 (726 to  | 25.10 (7.66  |
| 7  |              | to 4289)    | to 5219)    | to 33.07)    | 10 (8 to 13) | 25)         | to 165.93)   | 1011)        | 1253)        | to 43.50)    |
| 8  | Slovenia     |             |             | 124.02       |              |             |              |              |              |              |
| 9  |              | 8 (6 to 9)  | 17 (13 to   | (102.93 to   | 1 (1 to 2)   | 2 (1 to 3)  | 64.34 (-3.76 | 53 (24 to    | 86 (48 to    | 63.24 (-5.21 |
| 10 | Solomon      |             | 21)         | 148.4)       |              |             | to 176.72)   | 101)         | 156)         | to 190.03)   |
| 11 | Islands      |             |             | 165.38       |              |             |              |              |              |              |
| 12 |              | 237 (190 to | 630 (502 to | (145.60 to   | 19 (7 to 40) | 40 (21 to   | 109.57       | 1021 (282 to | 1986 (928 to | 94.57 (2.46  |
| 13 |              | 293)        | 786)        | 187.38)      |              | 71)         | (26.24 to    | 2543)        | 3988)        | to 316.32)   |
| 14 | Somalia      |             |             | 122.12       |              |             | 263.84)      |              |              |              |
| 15 |              | 2945 (2438  | 6542 (5423  | (114.01 to   | 98 (69 to    | 166 (124 to | 69.87 (20.49 | 4862 (3068   | 6143 (4966   | 26.34        |
| 16 |              | to 3586)    | to 7934)    | 131.25)      | 123)         | 196)        | to 168.66)   | to 7236)     | to 7083)     | (-18.56 to   |
| 17 | South Africa |             |             | 88.39 (73.80 |              |             |              |              |              | 13.58        |
| 18 |              | 249 (202 to | 469 (383 to | to 103.53)   | 22 (9 to 43) | 29 (16 to   | 29.68        | 1158 (325 to | 1315 (637 to |              |
| 19 | South Sudan  | 307)        | 576)        |              |              | 61)         | (-39.27 to   | 2801)        | 2625)        | (-53.56 to   |
| 20 |              |             |             | 98.14 (91.73 |              |             | 148.37)      |              |              | 178.43)      |
| 21 |              | 39276       | 77822       | 278 (237 to  | 377 (303 to  | 35.79 (8.43 |              | 11347 (9316  | 17466        | 53.93 (36.17 |
| 22 |              | (37463 to   | (74030 to   | to 104.75)   | 304)         | 600)        | to 121.33)   | to 13673)    | (13535 to    | to 79.47)    |
| 23 | Spain        | 41127)      | 81685)      |              |              |             |              | 22106)       |              |              |
| 24 |              | 909 (734 to | 2295 (2003  | 152.54       | 19 (14 to    | 21 (15 to   | 13.97        | 813 (609 to  | 895 (684 to  | 10.11        |
| 25 |              | 1119)       | to 2637)    | (124.22 to   | 24)          | 30)         | (-25.92 to   | 1032)        | 1147)        | (-20.92 to   |
| 26 | Sri Lanka    |             |             | 186.13)      |              |             | 74.18)       |              |              | 51.47)       |
| 27 |              | 3315 (2684  | 9292 (7568  | 180.28       | 21 (10 to    | 48 (28 to   | 123.91 (3.53 | 1310 (720 to | 3003 (2102   | 129.31 (11.1 |
| 28 |              | to 4060)    | to 11371)   | (157.81 to   | 44)          | 78)         | to 380.84)   | 2866)        | to 4130)     | to 282.19)   |
| 29 | Sudan        |             |             | 205.52)      |              |             |              |              |              |              |
| 30 |              | 79 (66 to   | 158 (129 to | 98.73 (81.35 | 3 (2 to 3)   | 4 (3 to 5)  | 32.93 (-4.19 | 118 (85 to   | 138 (109 to  | 16.97        |
| 31 | Suriname     | 96)         | 194)        | to 117.62)   |              |             | to 91.78)    | 146)         | 175)         | (-14.68 to   |
| 32 |              |             |             |              |              |             |              |              |              | 66.50)       |
| 33 |              | 30612       | 40244       | 31.46 (23.94 | 107 (86 to   | 95 (77 to   | -11.38       | 6158 (4631   | 7117 (5148   | 15.58 (4.65  |
| 34 |              | (26350 to   | (34733 to   | to 40.19)    | 119)         | 139)        | (-27.36 to   | to 7936)     | to 9548)     | to 28.78)    |
| 35 | Sweden       | 35136)      | 46000)      |              |              |             | 46.41)       |              |              |              |
| 36 |              | 10695 (9668 | 14969       | 39.96 (33.88 | 73 (58 to    | 123 (97 to  | 69.01 (36.46 | 2817 (2268   | 3807 (2979   | 35.16 (21.15 |
| 37 | Switzerland  | to 11813)   | (13688 to   | to 46.34)    | 83)          | 160)        | to 128.96)   | to 3429)     | to 4738)     | to 56.09)    |
| 38 |              |             |             | 116.26       |              |             |              |              |              |              |
| 39 |              | 2248 (1819  | 4862 (3940  | (97.13 to    | 23 (13 to    | 37 (20 to   | 57.25        | 1091 (741 to | 1653 (1195   | 51.58 (7.71  |
| 40 |              | to 2734)    | to 5871)    | 135.91)      | 35)          | 52)         | (-10.52 to   | 1432)        | to 2195)     | to 137.88)   |
| 41 | Syrian Arab  |             |             | 308.12       |              |             | 184.61)      |              |              |              |
| 42 | Republic     |             |             |              |              |             |              |              |              |              |
| 43 |              | 2221 (1923  | 9064 (8139  | (279.81 to   | 101 (67 to   | 199 (152 to | 97.46 (44.81 | 2623 (1919   | 4338 (3499   | 65.37 (31.64 |
| 44 | Taiwan       | to 2557)    | to 10153)   | 342.19)      | 113)         | 264)        | to 288.02)   | to 2947)     | to 5416)     | to 167.25)   |
| 45 | (Province of |             |             |              |              |             |              |              |              |              |
| 46 | China)       |             |             | 130.78       |              |             |              |              |              |              |
| 47 |              | 2391 (1972  | 5519 (4623  | (115.02 to   | 21 (11 to    | 18 (13 to   | -11.19       | 1691 (853 to | 1646 (1219   | -2.66        |
| 48 |              | to 2877)    | to 6632)    | 148.48)      | 34)          | 26)         | (-54.29 to   | 2831)        | to 2185)     | (-48.60 to   |
| 49 | Tajikistan   |             |             |              |              |             | 82.80)       |              |              | 91.67)       |
| 50 |              |             |             |              |              |             |              |              |              |              |
| 51 |              |             |             |              |              |             |              |              |              |              |
| 52 |              |             |             |              |              |             |              |              |              |              |
| 53 |              |             |             |              |              |             |              |              |              |              |
| 54 |              |             |             |              |              |             |              |              |              |              |
| 55 |              |             |             |              |              |             |              |              |              |              |
| 56 |              |             |             |              |              |             |              |              |              |              |
| 57 |              |             |             |              |              |             |              |              |              |              |
| 58 |              |             |             |              |              |             |              |              |              |              |
| 59 |              |             |             |              |              |             |              |              |              |              |
| 60 |              |             |             |              |              |             |              |              |              |              |

|    |              |              |              |              |              |              |              |             |              |              |            |
|----|--------------|--------------|--------------|--------------|--------------|--------------|--------------|-------------|--------------|--------------|------------|
| 1  |              |              |              |              |              |              |              |             |              |              |            |
| 2  |              |              |              |              |              |              |              |             |              |              |            |
| 3  |              |              | 119.65       |              |              |              |              |             |              | 12.87        |            |
| 4  | Thailand     | 1734 (1327   | 3808 (3078   | (96.59 to    | 72 (52 to    | 111 (80 to   | 54.05 (-3.23 | 2899 (2029  | 3272 (2453   | (-26.29 to   |            |
| 5  |              | to 2180)     | to 4630)     | 151.17)      | 95)          | 149)         | to 138.51)   | to 3946)    | to 4259)     | 71.96)       |            |
| 6  |              |              |              |              |              |              |              |             |              |              |            |
| 7  |              |              | 122.2        |              |              |              | 107.01       |             |              | 47.21        |            |
| 8  | Timor-Leste  | 18 (14 to    | 41 (33 to    | (104.08 to   | 1 (1 to 3)   | 3 (2 to 5)   | (24.75 to    | 59 (29 to   | 86 (48 to    | (-28.05 to   |            |
| 9  |              | 23)          | 50)          | 146.48)      |              |              |              | 102)        | 138)         | 185.55)      |            |
| 10 |              |              | 170.07       |              |              |              | 142.31       |             |              | 105.73       |            |
| 11 | Togo         | 190 (155 to  | 514 (418 to  | (148.46 to   | 9 (4 to 14)  | 21 (14 to    | (33.33 to    | 457 (182 to | 940 (589 to  | (15.73 to    |            |
| 12 |              | 232)         | 634)         | 196.29)      |              | 30)          |              | 393.01)     | 773)         | 1321)        | 366.27)    |
| 13 |              |              |              |              |              |              |              |             |              |              |            |
| 14 |              |              | 17.45 (9.66  |              |              |              | -38.14       |             |              | -39.66       |            |
| 15 | Tokelau      | 0 (0 to 0)   | 0 (0 to 0)   | to 26.52)    | 0 (0 to 0)   | 0 (0 to 0)   | (-61.51 to   | 0 (0 to 1)  | 0 (0 to 0)   | (-63.93 to   |            |
| 16 |              |              |              |              |              |              |              |             |              |              |            |
| 17 |              |              |              |              |              |              | -1.52)       |             |              | 8.06)        |            |
| 18 |              |              | 14.32 (5.18  |              |              |              | 0.57 (-36.36 | 21 (14 to   | 19 (13 to    | -11.27       |            |
| 19 | Tonga        | 4 (3 to 5)   | 4 (4 to 5)   | to 25.01)    | 1 (0 to 1)   | 1 (0 to 1)   | to 55.61)    | 30)         | 27)          | (-43.54 to   |            |
| 20 |              |              |              |              |              |              |              |             |              | 36.78)       |            |
| 21 |              |              | 73.31 (60.64 |              |              |              | 67.08 (17.69 | 143 (110 to | 215 (162 to  | 49.93 (17.59 |            |
| 22 | Trinidad and | 275 (226 to  | 476 (395 to  | to 88.40)    | 3 (2 to 4)   | 5 (4 to 7)   | to 135.28)   | 169)        | 279)         | to 92.29)    |            |
| 23 |              | Tobago       | 333)         | 586)         |              |              |              |             |              |              |            |
| 24 |              |              | 139.49       |              |              |              | 124.51       |             |              | 113.58       |            |
| 25 | Tunisia      | 2247 (1845   | 5382 (4413   | (122.55 to   | 7 (5 to 11)  | 16 (11 to    | (18.63 to    | 569 (405 to | 1215 (890 to | (59.27 to    |            |
| 26 |              | to 2720)     | to 6568)     | 159.3)       |              | 23)          |              | 312.49)     | 784)         | 1622)        | 174.73)    |
| 27 |              |              | 276.67       |              |              |              | 26.21        |             |              | 22488        |            |
| 28 | Turkey       | 24930        | 93902        | (231.04 to   | 261 (159 to  | 329 (250 to  | (-22.73 to   | 13910 (9268 | (17253 to    | 61.67 (9.74  |            |
| 29 |              | (21910 to    | (80596 to    | 325.07)      | 401)         | 471)         | 118.88)      | to 19352)   | 28896)       | to 147.01)   |            |
| 30 |              |              | 116.48       |              |              |              | 45.23 (9.53  | 765 (493 to | 1120 (805 to | 46.38 (13.41 |            |
| 31 | Turkmenistan | 1758 (1463   | 3806 (3155   | (102.66 to   | 10 (7 to 13) | 14 (9 to 20) | to 98.88)    | 1049)       | 1438)        | to 91.33)    |            |
| 32 |              | to 2085)     | to 4551)     | 132.01)      |              |              |              |             |              |              |            |
| 33 |              |              | 27.01 (14.84 |              |              |              | -5.17        |             |              | -16.57       |            |
| 34 | Tuvalu       | 0 (0 to 0)   | 0 (0 to 1)   | to 39.84)    | 0 (0 to 0)   | 0 (0 to 0)   | (-39.67 to   | 3 (1 to 5)  | 2 (1 to 4)   | (-50.42 to   |            |
| 35 |              |              |              |              |              |              |              |             |              |              |            |
| 36 |              |              | 198.27       |              |              |              | 114.15       |             |              | 103.84       |            |
| 37 | Uganda       | 569 (462 to  | 1697 (1381   | (178.98 to   | 48 (30 to    | 102 (70 to   | (26.45 to    | 2257 (1132  | 4600 (3084   | (-2.52 to    |            |
| 38 |              | 701)         | to 2111)     | 220.89)      | 75)          | 150)         | 252.91)      | to 4612)    | to 7058)     | 318.38)      |            |
| 39 |              |              | -3.95        |              |              |              | 12.61        | 13419       | 14197        | 5.80 (-13.37 |            |
| 40 | Ukraine      | 44470        | 42711        | (-10.23 to   | 230 (174 to  | 260 (210 to  | (-17.79 to   | (10673 to   | (11469 to    | to 26.77)    |            |
| 41 |              | (37197 to    | (36101 to    | 3.42)        | 306)         | 315)         | 52.12)       | 16857)      | 17211)       |              |            |
| 42 |              |              | 864.58       |              |              |              | 939.61       |             |              | 871.11       |            |
| 43 | United Arab  | 595 (477 to  | 5742 (4546   | (768.02 to   | 1 (1 to 3)   | 13 (7 to 22) | (312.54 to   | 144 (93 to  | 1401 (971 to | (531.13 to   |            |
| 44 |              | Emirates     | 725)         | to 7126)     | 978.3)       |              |              | 2260.01)    | 219)         | 1965)        | 1256.31)   |
| 45 |              |              | 150003       |              |              |              | 109.50       | 37500       | 55171        | 47.12 (29.39 |            |
| 46 | United       | 150003       | 194529       | 29.68 (26.73 | 856 (756 to  | 1793 (1533   | (62.60 to    | 37500       | 55171        | to 55.47)    |            |
| 47 |              | Kingdom      | (132531 to   | (173985 to   | to 33.13)    | 1056)        | to 1999)     | 132.89)     | (30121 to    | (45323 to    |            |
| 48 |              | 168508)      | 215870)      |              |              |              | 132.89)      | 46024)      | 66217)       |              |            |
| 49 | United       | 1121 (914 to | 2891 (2330   | 157.88       | 86 (53 to    | 181 (115 to  | 111.26       | 4655 (2090  | 8565 (4988   | 83.97 (-7.81 |            |
| 50 |              | Republic of  | 1369)        | to 3566)     | (138.98 to   | 152)         | 259)         | (24.98 to   | to 9955)     | to 14089)    | to 290.41) |
| 51 | Tanzania     |              |              | 177.80)      |              |              | 260.69)      |             |              |              |            |
| 52 |              |              |              |              |              |              |              |             |              |              |            |
| 53 |              |              |              |              |              |              |              |             |              |              |            |
| 54 |              |              |              |              |              |              |              |             |              |              |            |
| 55 |              |              |              |              |              |              |              |             |              |              |            |
| 56 |              |              |              |              |              |              |              |             |              |              |            |
| 57 |              |              |              |              |              |              |              |             |              |              |            |
| 58 |              |              |              |              |              |              |              |             |              |              |            |
| 59 |              |              |              |              |              |              |              |             |              |              |            |
| 60 |              |              |              |              |              |              |              |             |              |              |            |

|    |                |             |             |              |              |             |              |              |             |              |
|----|----------------|-------------|-------------|--------------|--------------|-------------|--------------|--------------|-------------|--------------|
| 1  |                |             |             |              |              |             |              |              |             |              |
| 2  |                |             |             |              |              |             |              |              |             |              |
| 3  |                | 982982      | 762890      | -22.39       |              |             | 172.17       | 186357       | 215289      |              |
| 4  | United States  | (846833 to  | (712357 to  | (-29.48 to   | 2171 (1940   | 5910 (4622  | (80.73 to    | (137531 to   | (175991 to  | 15.53 (-1.97 |
| 5  | of America     | 1129783)    | 813654)     | -14.49)      | to 2662)     | to 6464)    | 199.18)      | 243644)      | 256059)     | to 33.87)    |
| 6  |                |             |             |              |              |             | 11.78        |              |             | -9.33        |
| 7  |                |             |             |              |              |             |              |              |             |              |
| 8  | United States  | 32 (27 to   | 47 (39 to   | 46.61 (32.66 | 1 (0 to 1)   | 1 (1 to 1)  | (-24.49 to   | 26 (19 to    | 23 (18 to   | (-33.27 to   |
| 9  | Virgin Islands | 39)         | 58)         | to 61.87)    |              |             | 72.41)       | 32)          | 29)         | 25.88)       |
| 10 |                |             |             |              |              |             | 123.02       |              |             |              |
| 11 |                |             |             |              |              |             |              |              |             |              |
| 12 | Uruguay        | 586 (485 to | 685 (564 to | 16.85 (7.20  | 10 (9 to 14) | 22 (19 to   | (68.94 to    | 339 (290 to  | 572 (496 to | 68.83 (35.57 |
| 13 |                | 711)        | 830)        | to 26.83)    |              | 26)         | 165.97)      | 426)         | 648)        | to 94.94)    |
| 14 |                |             |             |              |              |             |              |              |             |              |
| 15 |                |             |             |              |              |             |              |              |             |              |
| 16 | Uzbekistan     | 10505 (8847 | 23340       | 122.19       | 48 (31 to    | 73 (58 to   | 51.36 (12.53 | 4299 (3006   | 6869 (5391  | 59.77 (27.87 |
| 17 |                | to 12563)   | (19452 to   | (107.43 to   | 59)          | 93)         | to 153.54)   | to 5336)     | to 8500)    | to 109.54)   |
| 18 |                |             |             |              |              |             |              |              |             |              |
| 19 |                |             |             | 115.45       |              |             |              |              |             |              |
| 20 | Vanuatu        | 4 (3 to 5)  | 9 (7 to 11) | (98.23 to    | 1 (0 to 1)   | 2 (1 to 2)  | 77.85 (12.27 | 33 (17 to    | 57 (33 to   | 71.58 (-1.00 |
| 21 |                |             |             | 135.09)      |              |             | to 189.96)   | 55)          | 92)         | to 187.82)   |
| 22 |                |             |             |              |              |             |              |              |             |              |
| 23 | Venezuela      | 3817 (3268  | 8787 (7406  | 130.21       | 28 (19 to    | 44 (31 to   | 58.23 (11.55 | 1676 (1316   | 2642 (2032  | 57.61 (25.64 |
| 24 | (Bolivarian    | to 4388)    | to 10382)   | (113.08 to   | 32)          | 59)         | to 165.19)   | to 1993)     | to 3372)    | to 101.69)   |
| 25 | Republic of)   |             |             | 147.54)      |              |             |              |              |             |              |
| 26 |                |             |             |              |              |             |              |              |             |              |
| 27 |                |             | 20278       | 326.50       |              |             | -19.57       |              |             | 11.56        |
| 28 | Viet Nam       | 4754 (3636  | (16050 to   | (284.54 to   | 221 (120 to  | 177 (119 to | (-57.9 to    | 6650 (4129   | 7419 (5510  | (-26.71 to   |
| 29 |                | to 5967)    | 25063)      | 376.20)      | 327)         | 247)        | 40.02)       | to 8928)     | to 9604)    | 73.67)       |
| 30 |                |             |             |              |              |             |              |              |             |              |
| 31 |                |             |             | 244.20       |              |             | 217.58       |              |             | 213.69       |
| 32 | Yemen          | 1826 (1464  | 6284 (5044  | (216.72 to   | 14 (8 to 25) | 44 (30 to   | (89.82 to    | 772 (495 to  | 2423 (1790  | (96.39 to    |
| 33 |                | to 2237)    | to 7734)    | 270.66)      |              | 68)         | 463.74)      | 1411)        | to 3248)    | 365.86)      |
| 34 |                |             |             |              |              |             |              |              |             |              |
| 35 |                |             |             | 233.83       |              |             | 57.07        |              |             | 31.27        |
| 36 | Zambia         | 291 (236 to | 971 (790 to | (206.24 to   | 35 (18 to    | 55 (38 to   | (-21.84 to   | 1941 (679 to | 2548 (1621  | (-46.88 to   |
| 37 |                | 350)        | 1210)       | 265.39)      | 64)          | 76)         | 226.50)      | 4527)        | to 3800)    | 283.23)      |
| 38 |                |             |             |              |              |             |              |              |             |              |
| 39 | Zimbabwe       | 524 (430 to | 931 (757 to | 77.84 (65.57 | 22 (16 to    | 43 (25 to   | 98.08 (13.90 | 1018 (652 to | 1888 (1075  | 85.39 (11.43 |
| 40 |                | 644)        | 1165)       | to 91.40)    | 31)          | 65)         | to 202.61)   | 1728)        | to 2968)    | to 204.97)   |

Abbreviations: UI=uncertainty interval.



**Supplementary Table 3** Age-standardised prevalence, death and DALY rates for inflammatory bowel disease (IBD) by 204 countries or territories in 1990 and 2019, and their temporal trends from 1990 to 2019

| Characteristics     | Age-standardised prevalence rate |                           |                        | Age-standardized death rate |                     |                        | Age-standardized DALY rate |                        |                        |
|---------------------|----------------------------------|---------------------------|------------------------|-----------------------------|---------------------|------------------------|----------------------------|------------------------|------------------------|
|                     | per 100,000 population           |                           |                        | per 100,000 population      |                     |                        | per 100,000 population     |                        |                        |
|                     | 1990 No.<br>(95%UI)              | 2019 No.<br>(95%UI)       | EAPC No.<br>(95%CI)    | 1990 No.<br>(95%UI)         | 2019 No.<br>(95%UI) | EAPC No.<br>(95%CI)    | 1990 No.<br>(95%UI)        | 2019 No.<br>(95%UI)    | EAPC No.<br>(95%CI)    |
| Afghanistan         | 21.95 (17.75 to 26.86)           | 23.69 (19.05 to 29.24)    | 0.57 (0.40 to 0.74)    | 0.44 (0.22 to 0.78)         | 0.43 (0.26 to 0.64) | 0.01 (-0.06 to 0.08)   | 15.26 (8.26 to 26.64)      | 14.58 (9.58 to 20.47)  | 0.03 (-0.06 to 0.12)   |
| Albania             | 119.15 (100.27 to 140.7)         | 116.19 (97.53 to 136.91)  | 0.01 (-0.06 to 0.09)   | 1.65 (0.90 to 2.05)         | 0.41 (0.27 to 0.61) | -5.17 (-6.14 to -4.19) | 110.06 (47.30 to 143.55)   | 36.18 (25.65 to 49.28) | -4.07 (-5.01 to -3.12) |
| Algeria             | 34.69 (30.01 to 40.15)           | 39.54 (32.16 to 48.88)    | 0.68 (0.53 to 0.83)    | 0.25 (0.17 to 0.37)         | 0.17 (0.13 to 0.23) | -1.14 (-1.23 to -1.04) | 11.17 (8.26 to 15.40)      | 9.93 (7.45 to 12.97)   | -0.28 (-0.38 to -0.17) |
| American Samoa      | 6.24 (5.14 to 7.41)              | 6.14 (5.03 to 7.38)       | -0.22 (-0.35 to -0.09) | 1.54 (0.89 to 2.28)         | 0.53 (0.37 to 0.90) | -4.40 (-4.80 to -4.01) | 44.49 (26.51 to 63.51)     | 15.67 (10.89 to 28.11) | -4.23 (-4.59 to -3.86) |
| Andorra             | 108.82 (91.32 to 128.78)         | 112.31 (94.3 to 132.64)   | 0.17 (0.11 to 0.22)    | 0.70 (0.49 to 1.00)         | 0.69 (0.41 to 1.01) | 0.03 (-0.06 to 0.13)   | 29.98 (22.66 to 38.91)     | 29.68 (20.92 to 39.03) | 0.02 (-0.03 to 0.07)   |
| Angola              | 7.20 (5.93 to 9.02)              | 8.85 (7.31 to 10.88)      | 0.59 (0.48 to 0.71)    | 0.73 (0.43 to 1.16)         | 0.62 (0.45 to 0.89) | -0.60 (-0.66 to -0.54) | 23.37 (11.91 to 42.94)     | 18.19 (12.6 to 26.15)  | -0.89 (-0.95 to -0.83) |
| Antigua and Barbuda | 31.33 (26.25 to 37.78)           | 31.79 (26.42 to 38.6)     | 0.10 (0.04 to 0.16)    | 0.95 (0.70 to 1.12)         | 0.67 (0.53 to 0.91) | -1.77 (-2.08 to -1.46) | 31.60 (24.03 to 36.76)     | 22.35 (17.9 to 28.99)  | -1.66 (-1.90 to -1.42) |
| Argentina           | 15.07 (12.24 to 17.99)           | 15.98 (13.09 to 19.42)    | 0.21 (0.19 to 0.23)    | 0.27 (0.24 to 0.30)         | 0.27 (0.23 to 0.31) | -0.10 (-0.25 to 0.04)  | 9.25 (8.00 to 10.66)       | 9.02 (7.72 to 10.63)   | -0.13 (-0.22 to -0.05) |
| Armenia             | 81.15 (67.51 to 95.76)           | 86.67 (72.86 to 104.56)   | 0.29 (0.26 to 0.32)    | 0.25 (0.19 to 0.30)         | 0.28 (0.21 to 0.34) | 0.72 (0.36 to 1.09)    | 19.99 (15.55 to 25.21)     | 20.5 (15.81 to 26.35)  | 0.20 (0.05 to 0.36)    |
| Australia           | 98.73 (82.47 to 116.23)          | 154.35 (134.91 to 175.51) | 1.00 (0.72 to 1.27)    | 0.54 (0.47 to 0.66)         | 0.78 (0.56 to 0.91) | 2.23 (1.81 to 2.66)    | 24.61 (19.22 to 31.12)     | 35.58 (27.28 to 45.33) | 1.20 (0.98 to 1.41)    |
| Austria             | 277.06 (243.01 to 307.67)        | 291.88 (260.14 to 327.43) | 0.19 (-0.09 to 0.46)   | 0.87 (0.77 to 1.13)         | 0.52 (0.43 to 0.81) | -1.59 (-2.15 to -1.03) | 61.71 (48.41 to 77.45)     | 54.31 (39.35 to 71.37) | -0.39 (-0.65 to -0.12) |
| Azerbaijan          | 76.23 (63.23 to 90.47)           | 81.93 (68.62 to 99.02)    | 0.35 (0.20 to 0.49)    | 0.22 (0.16 to 0.28)         | 0.16 (0.11 to 0.23) | -1.09 (-1.19 to -1.00) | 17.65 (13.27 to 23.02)     | 16.2 (11.65 to 21.65)  | -0.36 (-0.44 to -0.27) |
| Bahamas             | 32.77 (27.60 to 39.08)           | 28.72 (23.64 to 35.44)    | -0.27 (-0.39 to -0.15) | 0.59 (0.50 to 0.68)         | 0.49 (0.39 to 0.62) | -0.66 (-0.78 to -0.53) | 23.15 (19.78 to 26.78)     | 19.04 (15.33 to 23.86) | -0.72 (-0.81 to -0.63) |
| Bahrain             | 42.17 (36.27 to 48.42)           | 44.05 (36.4 to 53.11)     | 0.35 (0.18 to 0.51)    | 0.26 (0.20 to 0.33)         | 0.17 (0.13 to 0.22) | -1.34 (-1.69 to -0.99) | 11.98 (9.36 to 15.18)      | 10.05 (7.4 to 13.28)   | -0.53 (-0.63 to -0.43) |
| Bangladesh          | 17.19 (13.90 to 21.66)           | 21.62 (17.31 to 27)       | 0.65 (0.53 to 0.77)    | 1.00 (0.64 to 1.64)         | 0.56 (0.35 to 0.83) | -2.14 (-2.39 to -1.89) | 31.40 (20.47 to 45.16)     | 18.1 (12.11 to 25.27)  | -2.03 (-2.15 to -1.92) |
| Barbados            | 70.62 (59.14 to 84.46)           | 69.57 (58.9 to 83.59)     | 0.04 (-0.02 to 0.09)   | 0.42 (0.36 to 0.48)         | 0.38 (0.30 to 0.48) | -0.41 (-0.57 to -0.25) | 22.21 (18.13 to 27.15)     | 20.02 (15.56 to 25.32) | -0.42 (-0.48 to -0.36) |
| Belarus             | 82.25 (69.99 to 95.76)           | 87.85 (73.61 to 104.56)   | 0.38 (0.27 to 0.49)    | 0.36 (0.26 to 0.46)         | 0.38 (0.28 to 0.48) | 0.24 (0.09 to 0.39)    | 22.33 (16.76 to 27.90)     | 23.25 (17.89 to 28.61) | 0.17 (0.09 to 0.25)    |

|    |                 |               |               |               |               |               |               |              |               |               |
|----|-----------------|---------------|---------------|---------------|---------------|---------------|---------------|--------------|---------------|---------------|
| 1  |                 |               |               |               |               |               |               |              |               |               |
| 2  |                 |               |               |               |               |               |               |              |               |               |
| 3  |                 | to 96.97)     | to 104.11)    | 0.48)         | 0.48)         | 0.50)         | 0.39)         | to 28.89)    | to 29.87)     | 0.25)         |
| 4  |                 |               | 143.07        |               |               |               |               |              |               |               |
| 5  |                 | 83.42 (76.75  | (123.44 to    | 1.68 (1.42 to | 0.76 (0.67 to | 0.97 (0.76 to | 0.24 (-0.90   | 25.98 (21.36 | 36.56 (28.88  | 0.82 (0.35 to |
| 6  | Belgium         | to 90.48)     | 164.68)       | 1.94)         | 0.90)         | 1.12)         | to 1.40)      | to 31.07)    | to 45.93)     | 1.28)         |
| 7  |                 |               |               |               |               |               |               |              |               |               |
| 8  |                 |               |               |               |               |               |               |              |               |               |
| 9  | Belize          | 22.80 (18.88  | 24.31 (20.10  | 0.35 (0.25 to | 0.70 (0.48 to | 0.61 (0.50 to | -1.14 (-1.52  | 26.21 (19.11 | 21.80 (18.03  | -1.22 (-1.49  |
| 10 |                 | to 28.09)     | to 29.68)     | 0.45)         | 0.90)         | 0.80)         | to -0.76)     | to 32.42)    | to 27.26)     | to -0.95)     |
| 11 |                 |               |               |               |               |               |               |              |               |               |
| 12 | Benin           | 7.48 (6.20 to | 8.88 (7.27 to | 0.58 (0.47 to | 0.48 (0.26 to | 0.45 (0.30 to | -0.42 (-0.64  | 17.20 (8.03  | 15.67 (9.98   | -0.50 (-0.70  |
| 13 |                 | 9.10)         | 10.87)        | 0.69)         | 0.86)         | 0.65)         | to -0.20)     | to 28.30)    | to 22.61)     | to -0.30)     |
| 14 | Bermuda         | 34.26 (28.75  | 34.27 (28.46  | 0.17 (0.09 to | 0.89 (0.66 to | 0.36 (0.28 to | -3.73 (-4.07  | 28.26 (22.38 | 14.3 (11.3 to | -2.73 (-3.00  |
| 15 |                 | to 41.82)     | to 40.73)     | 0.25)         | 1.08)         | 0.50)         | to -3.40)     | to 33.89)    | 18.41)        | to -2.46)     |
| 16 |                 |               |               |               |               |               |               |              |               |               |
| 17 | Bhutan          | 16.74 (13.31  | 22.23 (18.11  | 1.24 (1.11 to | 0.68 (0.35 to | 0.55 (0.34 to | -0.84 (-0.97  | 21.23 (11.26 | 15.82 (10.39  | -1.18 (-1.27  |
| 18 |                 | to 21.03)     | to 27.62)     | 1.38)         | 1.53)         | 1.23)         | to -0.72)     | to 43.14)    | to 31.52)     | to -1.10)     |
| 19 | Bolivia         |               |               |               |               |               |               |              |               |               |
| 20 | (Plurinational  | 13.46 (11.31  | 13.54 (11.36  | 0.05 (0.00 to | 0.50 (0.27 to | 0.40 (0.30 to | -0.83 (-0.91  | 22.17 (10.30 | 12.73 (9.53   | -2.04 (-2.15  |
| 21 | State of)       | to 16.36)     | to 16.33)     | 0.10)         | 0.79)         | 0.52)         | to -0.75)     | to 41.41)    | to 16.38)     | to -1.94)     |
| 22 |                 |               |               |               |               |               |               |              |               |               |
| 23 | Bosnia and      | 102.41        | 122.38        |               |               |               |               |              |               |               |
| 24 | Herzegovina     | (88.37 to     | (107.08 to    | 0.58 (0.55 to | 0.46 (0.33 to | 0.45 (0.23 to | -0.20 (-0.52  | 27.68 (21.43 | 29.74 (21.21  | 0.14 (-0.01   |
| 25 |                 | 118.99)       | 140.67)       | 0.61)         | 0.58)         | 0.61)         | to 0.12)      | to 35.18)    | to 38.84)     | to 0.28)      |
| 26 |                 |               |               |               |               |               |               |              |               |               |
| 27 | Botswana        | 8.58 (7.14 to | 10.89 (8.88   | 0.60 (0.44 to | 0.70 (0.48 to | 0.64 (0.43 to | -0.77 (-1.15  | 20.94 (14.53 | 20.3 (13.14   | -0.41 (-0.71  |
| 28 |                 | 10.52)        | to 13.6)      | 0.76)         | 1.00)         | 0.89)         | to -0.39)     | to 29.34)    | to 30.81)     | to -0.11)     |
| 29 |                 |               |               |               |               |               |               |              |               |               |
| 30 | Brazil          | 65.87 (57.91  | 47.78 (41.6   | -0.87 (-1.09  | 0.48 (0.42 to | 0.45 (0.41 to | 0.01 (-0.16   | 23.70 (20.23 | 19.51 (16.72  | -0.44 (-0.62  |
| 31 |                 | to 74.92)     | to 54.51)     | to -0.65)     | 0.52)         | 0.52)         | to 0.19)      | to 27.67)    | to 22.74)     | to -0.27)     |
| 32 | Brunei          | 53.76 (43.58  | 57.28 (46.33  | 0.25 (0.24 to | 1.52 (1.08 to | 1.48 (0.97 to | 0.09 (-0.02   | 36.51 (27.84 | 32.76 (26.62  | -0.25 (-0.33  |
| 33 | Darussalam      | to 66.16)     | to 70.04)     | 0.27)         | 2.01)         | 1.89)         | to 0.20)      | to 47.59)    | to 39.71)     | to -0.18)     |
| 34 |                 |               |               |               |               |               |               |              |               |               |
| 35 | Bulgaria        | 127.47        | 120.16        | -0.16 (-0.29  | 0.26 (0.23 to | 0.33 (0.25 to | 1.13 (0.73 to | 28.31 (21.41 | 27.62 (20.56  | 0.00 (-0.21   |
| 36 |                 | (108.71 to    | (101.94 to    | to -0.03)     | 0.31)         | 0.41)         | 1.54)         | to 36.54)    | to 35.57)     | to 0.21)      |
| 37 |                 | 149.68)       | 142.65)       |               |               |               |               |              |               |               |
| 38 |                 |               |               |               |               |               |               |              |               |               |
| 39 | Burkina Faso    | 6.79 (5.57 to | 7.81 (6.46 to | 0.59 (0.41 to | 0.61 (0.37 to | 0.67 (0.38 to | 0.56 (0.28 to | 21.41 (10.66 | 22.52 (12.05  | 0.38 (0.15 to |
| 40 |                 | 8.47)         | 9.56)         | 0.77)         | 0.89)         | 1.00)         | 0.85)         | to 33.67)    | to 34.80)     | 0.62)         |
| 41 | Burundi         | 6.12 (5.03 to | 6.13 (5.06 to | -0.09 (-0.19  | 0.69 (0.45 to | 0.73 (0.46 to | 0.15 (-0.07   | 22.15 (14.22 | 20.85 (13.56  | -0.20 (-0.42  |
| 42 |                 | 7.50)         | 7.50)         | to 0.01)      | 1.02)         | 1.16)         | to 0.37)      | to 36.56)    | to 32.18)     | to 0.03)      |
| 43 |                 |               |               |               |               |               |               |              |               |               |
| 44 | Cabo Verde      | 10.12 (8.33   | 12.18 (9.88   | 0.76 (0.65 to | 0.33 (0.20 to | 0.25 (0.19 to | -2.05 (-2.56  | 12.86 (8.37  | 8.69 (6.98 to | -2.12 (-2.50  |
| 45 |                 | to 12.38)     | to 14.93)     | 0.88)         | 0.46)         | 0.33)         | to -1.54)     | to 17.33)    | 10.77)        | to -1.74)     |
| 46 |                 |               |               |               |               |               |               |              |               |               |
| 47 | Cambodia        | 3.02 (2.34 to | 3.77 (3.01 to | 0.65 (0.57 to | 0.50 (0.27 to | 0.35 (0.23 to | -1.44 (-1.54  | 14.51 (8.27  | 8.98 (6.42 to | -1.86 (-1.96  |
| 48 |                 | 3.74)         | 4.61)         | 0.72)         | 0.71)         | 0.45)         | to -1.34)     | to 21.45)    | 11.33)        | to -1.77)     |
| 49 | Cameroon        | 8.34 (6.88 to | 10.13 (8.33   | 0.79 (0.68 to | 0.54 (0.29 to | 0.38 (0.21 to | -1.69 (-1.94  | 18.12 (9.17  | 13.36 (7.77   | -1.43 (-1.66  |
| 50 |                 | 10.38)        | to 12.46)     | 0.90)         | 0.88)         | 0.59)         | to -1.43)     | to 27.57)    | to 21.03)     | to -1.20)     |
| 51 |                 |               |               |               |               |               |               |              |               |               |
| 52 | Canada          | 382.53        | 357.73        | 0.13 (-0.03   | 0.87 (0.77 to | 0.56 (0.46 to | -2.43 (-3.11  | 74.34 (56.49 | 64.91 (46.59  | -0.31 (-0.41  |
| 53 |                 | (367.54 to    | (323.05 to    | to 0.28)      | 0.97)         | 0.82)         | to -1.75)     | to 95.45)    | to 85.11)     | to -0.21)     |
| 54 |                 | 397.57)       | 393.88)       |               |               |               |               |              |               |               |
| 55 | Central African | 6.56 (5.39 to | 6.92 (5.75 to | 0.16 (0.14 to | 0.86 (0.55 to | 0.86 (0.53 to | 0.02 (-0.06   | 26.29 (16.24 | 25.47 (14.87  | -0.07 (-0.13  |
| 56 | Republic        | 8.20)         | 8.49)         | 0.18)         | 1.38)         | 1.36)         | to 0.10)      | to 42.90)    | to 41.50)     | to 0.00)      |
| 57 |                 |               |               |               |               |               |               |              |               |               |
| 58 | Chad            | 6.92 (5.73 to | 8.10 (6.65 to | 0.68 (0.57 to | 0.58 (0.32 to | 0.58 (0.39 to | -0.24 (-0.45  | 20.08 (9.86  | 19.16 (11.97  | -0.36 (-0.55  |
| 59 |                 | 8.53)         | 9.90)         | 0.80)         | 0.98)         | 0.84)         | to -0.04)     | to 32.61)    | to 27.44)     | to -0.16)     |
| 60 |                 |               |               |               |               |               |               |              |               |               |

|    |                 |                           |                           |                        |                     |                     |                        |                        |                        |                        |
|----|-----------------|---------------------------|---------------------------|------------------------|---------------------|---------------------|------------------------|------------------------|------------------------|------------------------|
| 1  |                 |                           |                           |                        |                     |                     |                        |                        |                        |                        |
| 2  |                 |                           |                           |                        |                     |                     |                        |                        |                        |                        |
| 3  |                 |                           |                           |                        |                     |                     |                        |                        |                        |                        |
| 4  | Chile           | 30.30 (25.82 to 35.36)    | 31.66 (27.25 to 36.7)     | 0.29 (-0.09 to 0.67)   | 0.46 (0.37 to 0.51) | 0.30 (0.26 to 0.38) | -1.75 (-2.10 to -1.40) | 16.52 (13.59 to 19.03) | 11.96 (9.91 to 14.48)  | -1.10 (-1.28 to -0.91) |
| 6  | China           | 22.85 (18.98 to 27.15)    | 47.06 (40.05 to 54.99)    | 2.80 (2.41 to 3.19)    | 0.86 (0.59 to 1.16) | 0.30 (0.24 to 0.35) | -4.11 (-4.50 to -3.71) | 24.47 (17.88 to 30.19) | 13.1 (10.29 to 16.31)  | -2.36 (-2.54 to -2.18) |
| 9  | Colombia        | 29.55 (24.81 to 34.95)    | 29.36 (24.89 to 34.88)    | -0.04 (-0.07 to -0.01) | 0.28 (0.25 to 0.31) | 0.29 (0.22 to 0.38) | 0.75 (0.38 to 1.12)    | 12.89 (10.91 to 15.21) | 12.53 (9.75 to 15.57)  | 0.36 (0.12 to 0.60)    |
| 12 | Comoros         | 7.33 (6.01 to 9.00)       | 7.78 (6.38 to 9.69)       | 0.36 (0.24 to 0.48)    | 0.83 (0.43 to 1.44) | 0.75 (0.48 to 1.19) | -0.51 (-0.67 to -0.36) | 23.44 (10.67 to 39.49) | 20.58 (13.10 to 30.54) | -0.63 (-0.84 to -0.41) |
| 14 | Congo           | 9.67 (7.93 to 11.87)      | 10.38 (8.57 to 12.74)     | 0.30 (0.16 to 0.45)    | 0.79 (0.56 to 1.16) | 0.66 (0.47 to 0.93) | -0.58 (-0.75 to -0.41) | 23.58 (16.35 to 34.61) | 18.36 (13.15 to 25.90) | -0.82 (-0.99 to -0.66) |
| 17 | Cook Islands    | 6.37 (5.18 to 7.65)       | 6.17 (5.09 to 7.51)       | -0.21 (-0.35 to -0.06) | 1.64 (1.17 to 2.20) | 0.81 (0.53 to 1.11) | -2.70 (-2.90 to -2.50) | 50.74 (35.37 to 72.08) | 24.94 (15.58 to 36.18) | -2.70 (-2.88 to -2.51) |
| 19 | Costa Rica      | 30.77 (25.88 to 36.60)    | 31.40 (26.47 to 37.15)    | 0.04 (0.03 to 0.05)    | 0.14 (0.12 to 0.16) | 0.20 (0.14 to 0.26) | 1.04 (0.82 to 1.26)    | 8.60 (6.81 to 10.81)   | 10.14 (7.74 to 12.91)  | 0.58 (0.47 to 0.69)    |
| 22 | Côte d'Ivoire   | 8.08 (6.58 to 9.97)       | 8.70 (7.15 to 10.96)      | 0.43 (0.34 to 0.52)    | 0.46 (0.23 to 0.80) | 0.40 (0.26 to 0.58) | -0.71 (-0.97 to -0.45) | 15.45 (7.59 to 24.88)  | 13.59 (8.56 to 19.48)  | -0.63 (-0.86 to -0.40) |
| 25 | Croatia         | 166.42 (155.48 to 178.41) | 203.79 (188.71 to 220.14) | 0.64 (0.57 to 0.70)    | 0.28 (0.24 to 0.42) | 0.41 (0.30 to 0.52) | 1.79 (1.42 to 2.17)    | 33.08 (24.90 to 42.82) | 41.30 (30.43 to 53.17) | 0.79 (0.65 to 0.93)    |
| 28 | Cuba            | 30.31 (25.30 to 36.52)    | 29.25 (23.94 to 35.26)    | -0.01 (-0.07 to 0.06)  | 0.35 (0.23 to 0.42) | 0.23 (0.18 to 0.29) | -2.04 (-2.48 to -1.60) | 14.22 (10.70 to 16.97) | 10.45 (8.37 to 12.94)  | -1.38 (-1.64 to -1.12) |
| 31 | Cyprus          | 42.09 (35.82 to 49.01)    | 58.44 (53.02 to 63.85)    | 0.98 (0.85 to 1.11)    | 2.09 (1.24 to 3.02) | 1.00 (0.76 to 1.32) | -3.13 (-3.45 to -2.81) | 36.43 (25.10 to 47.83) | 22.06 (17.95 to 26.41) | -2.26 (-2.48 to -2.03) |
| 34 | Czechia         | 85.23 (71.89 to 102.44)   | 152.02 (139.69 to 164.49) | 1.52 (1.33 to 1.71)    | 0.54 (0.49 to 0.63) | 0.56 (0.42 to 0.69) | 0.80 (0.45 to 1.15)    | 26.65 (21.98 to 32.43) | 35.40 (27.15 to 44.74) | 0.98 (0.90 to 1.06)    |
| 37 | Democratic      |                           |                           |                        |                     |                     |                        |                        |                        |                        |
| 38 | People's        |                           |                           |                        |                     |                     |                        |                        |                        |                        |
| 39 | Republic of     | 15.93 (13.23 to 19.03)    | 15.61 (12.96 to 18.71)    | -0.13 (-0.21 to -0.06) | 0.57 (0.33 to 0.82) | 0.41 (0.28 to 0.59) | -1.10 (-1.20 to -1.00) | 17.24 (9.70 to 27.63)  | 11.10 (8.17 to 14.58)  | -1.31 (-1.41 to -1.21) |
| 41 | Korea           |                           |                           |                        |                     |                     |                        |                        |                        |                        |
| 42 | Democratic      |                           |                           |                        |                     |                     |                        |                        |                        |                        |
| 43 | Republic of the | 8.50 (6.93 to 10.44)      | 7.80 (6.41 to 9.73)       | -0.45 (-0.71 to -0.20) | 0.71 (0.50 to 1.02) | 0.57 (0.40 to 0.82) | -0.78 (-0.91 to -0.64) | 21.69 (14.31 to 32.28) | 17.22 (12.20 to 24.09) | -0.82 (-0.97 to -0.66) |
| 44 | Congo           |                           |                           |                        |                     |                     |                        |                        |                        |                        |
| 46 |                 | 232.13 (210.74 to 255.89) | 227.82 (208.42 to 250.75) | 0.47 (0.29 to 0.65)    | 0.53 (0.48 to 0.62) | 0.59 (0.50 to 0.68) | 0.01 (-0.61 to 0.63)   | 46.68 (35.05 to 59.60) | 45.17 (34.12 to 58.06) | 0.13 (-0.02 to 0.29)   |
| 47 | Denmark         |                           |                           |                        |                     |                     |                        |                        |                        |                        |
| 49 |                 |                           |                           |                        |                     |                     |                        |                        |                        |                        |
| 50 | Djibouti        | 7.12 (5.93 to 8.73)       | 9.07 (7.45 to 11.07)      | 1.24 (1.04 to 1.45)    | 0.60 (0.37 to 1.07) | 0.54 (0.36 to 0.89) | -0.56 (-0.67 to -0.45) | 18.05 (10.87 to 32.37) | 15.83 (10.31 to 24.84) | -0.67 (-0.82 to -0.53) |
| 53 | Dominica        | 29.23 (24.60 to 35.45)    | 27.29 (22.61 to 33.47)    | -0.12 (-0.18 to -0.07) | 1.01 (0.79 to 1.23) | 0.76 (0.57 to 1.02) | -1.20 (-1.28 to -1.12) | 34.22 (27.47 to 41.24) | 26 (20.19 to 34.33)    | -1.17 (-1.27 to -1.07) |
| 55 | Dominican       | 25.16 (20.80 to 30.54)    | 24.19 (19.90 to 29.50)    | 0.16 (0.01 to 0.32)    | 0.24 (0.19 to 0.31) | 0.24 (0.17 to 0.32) | 0.09 (-0.13 to 0.32)   | 12.08 (9.46 to 15.94)  | 10.73 (7.96 to 13.99)  | -0.27 (-0.50 to -0.04) |
| 56 | Republic        |                           |                           |                        |                     |                     |                        |                        |                        |                        |
| 58 | Ecuador         | 17.02 (15.04 to 19.21)    | 19.97 (17.98 to 22.11)    | 0.49 (0.39 to 0.59)    | 0.23 (0.18 to 0.31) | 0.23 (0.17 to 0.30) | 0.55 (-0.03 to 1.13)   | 10.90 (8.22 to 13.94)  | 9.02 (6.84 to 11.09)   | -0.33 (-0.74 to 0.08)  |
| 59 |                 |                           |                           |                        |                     |                     |                        |                        |                        |                        |
| 60 |                 |                           |                           |                        |                     |                     |                        |                        |                        |                        |

|    |                   |                           |                           |                        |                     |                     |                        |                        |                        |                        |
|----|-------------------|---------------------------|---------------------------|------------------------|---------------------|---------------------|------------------------|------------------------|------------------------|------------------------|
| 1  |                   |                           |                           |                        |                     |                     |                        |                        |                        |                        |
| 2  |                   |                           |                           |                        |                     |                     |                        |                        |                        |                        |
| 3  |                   |                           |                           |                        |                     |                     |                        |                        |                        |                        |
| 4  | Egypt             | 39.84 (33.94 to 46.00)    | 44.48 (36.34 to 55.00)    | 0.26 (0.20 to 0.32)    | 0.22 (0.13 to 0.47) | 0.21 (0.12 to 0.35) | 0.32 (0.07 to 0.56)    | 11.25 (7.91 to 16.51)  | 11.49 (8.21 to 15.51)  | 0.19 (0.10 to 0.27)    |
| 6  | El Salvador       | 23.89 (19.87 to 28.45)    | 24.71 (20.64 to 29.14)    | 0.12 (0.05 to 0.19)    | 0.36 (0.23 to 0.45) | 0.14 (0.11 to 0.20) | -3.87 (-4.22 to -3.52) | 15.07 (11.16 to 18.78) | 7.25 (5.45 to 9.54)    | -2.87 (-3.18 to -2.56) |
| 9  | Equatorial Guinea | 7.11 (5.84 to 8.80)       | 10.89 (9.04 to 13.36)     | 1.66 (1.48 to 1.85)    | 0.76 (0.44 to 1.28) | 0.54 (0.33 to 0.86) | -1.45 (-1.60 to -1.30) | 23.13 (13.07 to 37.98) | 14.77 (9.26 to 22.66)  | -1.89 (-2.04 to -1.73) |
| 12 | Eritrea           | 6.35 (5.28 to 7.85)       | 6.98 (5.79 to 8.43)       | 0.26 (0.21 to 0.32)    | 0.61 (0.39 to 0.96) | 0.77 (0.52 to 1.12) | 0.71 (0.52 to 0.89)    | 20.05 (11.19 to 34.57) | 22.27 (15.26 to 32.30) | 0.34 (0.20 to 0.49)    |
| 15 | Estonia           | 71.59 (62.77 to 81.41)    | 103.71 (90.72 to 118.15)  | 1.12 (0.91 to 1.32)    | 0.55 (0.46 to 0.61) | 0.34 (0.26 to 0.47) | -2.35 (-2.68 to -2.02) | 28.55 (23.60 to 33.59) | 24.50 (18.49 to 31.62) | -1.07 (-1.32 to -0.81) |
| 18 | Eswatini          | 8.30 (6.84 to 10.21)      | 9.49 (7.76 to 11.68)      | 0.49 (0.39 to 0.58)    | 0.55 (0.33 to 0.83) | 0.60 (0.42 to 0.83) | 0.53 (0.14 to 0.91)    | 17.33 (9.97 to 26.06)  | 17.93 (12.43 to 25.37) | 0.38 (0.14 to 0.63)    |
| 21 | Ethiopia          | 5.88 (4.90 to 7.15)       | 6.78 (5.64 to 8.29)       | 0.53 (0.48 to 0.59)    | 0.84 (0.59 to 1.34) | 0.72 (0.42 to 1.07) | -0.67 (-0.82 to -0.52) | 26.74 (17.05 to 45.16) | 19.04 (11.93 to 28.10) | -1.33 (-1.48 to -1.18) |
| 23 | Fiji              | 4.78 (3.90 to 5.75)       | 4.70 (3.85 to 5.71)       | -0.12 (-0.34 to 0.09)  | 0.35 (0.26 to 0.45) | 0.26 (0.19 to 0.34) | -1.16 (-1.28 to -1.03) | 10.67 (8.31 to 13.70)  | 8.17 (5.94 to 10.77)   | -1.08 (-1.21 to -0.95) |
| 26 | Finland           | 162.00 (150.44 to 173.8)  | 286.76 (256.44 to 318.38) | 1.86 (1.78 to 1.94)    | 0.47 (0.35 to 0.55) | 0.29 (0.25 to 0.34) | -2.22 (-2.47 to -1.96) | 33.34 (25.19 to 43.04) | 47.57 (33.68 to 63.99) | 1.06 (0.98 to 1.14)    |
| 30 | France            | 96.03 (87.62 to 104.59)   | 136.71 (123.31 to 151.14) | 1.43 (1.34 to 1.53)    | 1.08 (0.93 to 1.20) | 1.21 (0.73 to 1.42) | 0.74 (0.46 to 1.02)    | 31.92 (26.78 to 37.48) | 39.44 (31.13 to 48.47) | 1.07 (0.94 to 1.20)    |
| 33 | Gabon             | 9.49 (7.90 to 11.62)      | 11.27 (9.27 to 13.92)     | 0.53 (0.51 to 0.56)    | 0.61 (0.41 to 0.96) | 0.53 (0.38 to 0.76) | -0.49 (-0.70 to -0.28) | 18.69 (12.11 to 28.60) | 15.27 (10.62 to 21.51) | -0.71 (-0.88 to -0.54) |
| 36 | Gambia            | 8.70 (7.11 to 10.56)      | 8.81 (7.23 to 10.96)      | -0.10 (-0.21 to 0.01)  | 0.58 (0.34 to 0.92) | 0.44 (0.29 to 0.60) | -1.52 (-1.81 to -1.24) | 19.12 (10.73 to 31.19) | 14.25 (9.59 to 19.10)  | -1.56 (-1.85 to -1.28) |
| 39 | Georgia           | 84.45 (71.53 to 99.72)    | 87.97 (73.75 to 104.83)   | 0.15 (0.08 to 0.22)    | 0.29 (0.18 to 0.39) | 0.29 (0.19 to 0.37) | 0.18 (-1.12 to 1.50)   | 20.37 (15.24 to 26.41) | 20.25 (15.35 to 26.28) | 0.02 (-0.38 to 0.41)   |
| 42 | Germany           | 104.26 (89.74 to 121.91)  | 214.93 (188.62 to 243.64) | 1.09 (0.54 to 1.64)    | 0.96 (0.79 to 1.60) | 1.94 (1.46 to 2.20) | 3.73 (3.26 to 4.20)    | 35.51 (28.44 to 47.28) | 64.06 (51.49 to 77.71) | 1.80 (1.57 to 2.02)    |
| 45 | Ghana             | 10.54 (8.69 to 12.71)     | 12.26 (10.11 to 14.88)    | 0.73 (0.63 to 0.83)    | 0.70 (0.35 to 1.24) | 0.55 (0.31 to 0.82) | -0.97 (-1.23 to -0.70) | 24.11 (11.81 to 39.44) | 18.5 (10.85 to 26.95)  | -1.02 (-1.27 to -0.77) |
| 48 | Greece            | 97.92 (82.43 to 113.83)   | 78.66 (70.88 to 87.04)    | -0.98 (-1.20 to -0.75) | 0.26 (0.22 to 0.30) | 0.23 (0.19 to 0.27) | -0.36 (-0.92 to 0.20)  | 19.2 (14.17 to 25.49)  | 15.88 (11.92 to 20.55) | -0.78 (-0.85 to -0.71) |
| 51 | Greenland         | 144.67 (122.01 to 170.01) | 163.39 (138.74 to 188.49) | 0.34 (0.27 to 0.40)    | 0.57 (0.45 to 0.71) | 0.74 (0.38 to 0.96) | 1.07 (0.80 to 1.34)    | 34.12 (26.01 to 44.17) | 38.3 (28.36 to 50.15)  | 0.36 (0.24 to 0.47)    |
| 54 | Grenada           | 24.13 (19.74 to 29.02)    | 24.31 (20.03 to 30.13)    | 0.03 (-0.05 to 0.12)   | 1.34 (1.06 to 1.62) | 1.24 (1.03 to 1.52) | -0.55 (-0.68 to -0.41) | 44.27 (36.58 to 52.74) | 38.43 (32.58 to 46.61) | -0.64 (-0.73 to -0.56) |
| 57 | Guam              | 6.83 (5.65 to 8.11)       | 6.54 (5.35 to 7.82)       | -0.18 (-0.35 to -0.01) | 0.33 (0.26 to 0.42) | 0.16 (0.12 to 0.23) | -3.00 (-3.55 to -2.45) | 9.01 (7.19 to 11.32)   | 5.39 (4.11 to 7.68)    | -2.12 (-2.65 to -1.59) |
| 59 | Guatemala         | 21.60 (18.10 to 24.10)    | 23.54 (19.84 to 27.24)    | 0.29 (0.25 to 0.33)    | 0.25 (0.18 to 0.32) | 0.29 (0.22 to 0.36) | 1.32 (0.72 to 1.92)    | 11.81 (8.36 to 15.26)  | 11.99 (9.52 to 14.46)  | 0.71 (0.18 to 1.24)    |
| 60 |                   |                           |                           |                        |                     |                     |                        |                        |                        |                        |

|    |               |               |               |               |               |               |               |               |              |               |
|----|---------------|---------------|---------------|---------------|---------------|---------------|---------------|---------------|--------------|---------------|
| 1  |               |               |               |               |               |               |               |               |              |               |
| 2  |               |               |               |               |               |               |               |               |              |               |
| 3  |               | to 26.13)     | to 28.11)     | 0.32)         | 0.38)         | 0.37)         | 1.92)         | to 18.2)      | to 14.91)    | 1.24)         |
| 4  |               | 7.53 (6.18 to | 8.61 (7.06 to | 0.61 (0.49 to | 0.43 (0.18 to | 0.40 (0.21 to | -0.36 (-0.50  | 16.9 (6.31 to | 14.41 (7.36  | -0.58 (-0.70  |
| 5  | Guinea        | 9.35)         | 10.53)        | 0.74)         | 0.86)         | 0.60)         | to -0.22)     | 29.14)        | to 21.95)    | to -0.47)     |
| 6  |               | 7.32 (5.99 to | 8.43 (6.92 to | 0.63 (0.50 to | 0.75 (0.36 to | 0.61 (0.4 to  | -0.81 (-0.93  | 26.39 (11.34  | 20.54 (12.76 | -0.94 (-1.07  |
| 7  |               | 9.06)         | 10.32)        | 0.76)         | 1.18)         | 0.85)         | to -0.68)     | to 44.49)     | to 28.9)     | to -0.80)     |
| 8  | Guinea-Bissau | 23.56 (19.43  | 22.95 (18.93  | 0.06 (-0.03   | 1.19 (0.97 to | 1.02 (0.76 to | -0.53 (-0.70  | 40.69 (32.87  | 35.43 (26.51 | -0.46 (-0.59  |
| 9  |               | to 28.53)     | to 28.26)     | to 0.15)      | 1.41)         | 1.33)         | to -0.35)     | to 48.37)     | to 46.07)    | to -0.32)     |
| 10 | Guyana        | 20.11 (16.54  | 19.43 (16.14  | 0.07 (-0.03   | 1.41 (0.74 to | 1.08 (0.61 to | -0.77 (-0.89  | 52.02 (22.41  | 36.86 (19.94 | -0.94 (-1.12  |
| 11 |               | to 24.88)     | to 24.31)     | to 0.17)      | 2.12)         | 1.59)         | to -0.65)     | to 92.43)     | to 54.22)    | to -0.77)     |
| 12 | Haiti         | 22.83 (18.97  | 23.93 (19.84  | 0.18 (0.14 to | 0.72 (0.46 to | 0.83 (0.51 to | 0.87 (0.73 to | 28.54 (19.06  | 24.37 (15.88 | -0.38 (-0.43  |
| 13 |               | to 27.11)     | to 28.49)     | 0.23)         | 0.99)         | 1.15)         | 1.02)         | to 38.67)     | to 32.67)    | to -0.32)     |
| 14 | Honduras      | 199.20        | 332.82        | 2.13 (1.78 to | 0.64 (0.58 to | 0.56 (0.45 to | -0.62 (-1.04  | 48.33 (38.31  | 64.34 (47.69 | 1.15 (0.85 to |
| 15 | Hungary       | (181.71 to    | (309.79 to    | 2.48)         | 0.82)         | 0.71)         | to -0.20)     | to 59.55)     | to 82.55)    | 1.46)         |
| 16 |               | 219.68)       | 356.72)       |               |               |               |               |               |              |               |
| 17 |               | 136.42        | 210.18        | 0.84 (0.59 to | 0.67 (0.57 to | 0.65 (0.51 to | 0.14 (-0.01   | 33.49 (26.34  | 42.38 (31.83 | 0.47 (0.33 to |
| 18 | Iceland       | (115.41 to    | (180.43 to    | 1.09)         | 0.78)         | 0.75)         | to 0.29)      | to 42.36)     | to 54.83)    | 0.62)         |
| 19 |               | 161.21)       | 243.51)       |               |               |               |               |               |              |               |
| 20 | India         | 20.68 (16.76  | 20.34 (16.57  | 0.18 (-0.03   | 0.63 (0.43 to | 0.40 (0.29 to | -1.93 (-2.11  | 20.11 (13.58  | 13.04 (9.44  | -1.73 (-1.86  |
| 21 |               | to 25.67)     | to 24.97)     | to 0.38)      | 0.91)         | 0.53)         | to -1.74)     | to 26.72)     | to 16.5)     | to -1.61)     |
| 22 | Indonesia     | 3.37 (2.70 to | 4.16 (3.37 to | 0.74 (0.60 to | 0.77 (0.37 to | 0.55 (0.33 to | -1.42 (-1.56  | 19.48 (11.70  | 11.66 (8.16  | -2.04 (-2.17  |
| 23 |               | 4.07)         | 5.00)         | 0.88)         | 1.04)         | 0.70)         | to -1.29)     | to 24.6)      | to 14.98)    | to -1.91)     |
| 24 | Iran (Islamic | 41.07 (33.51  | 44.80 (36.70  | 0.29 (0.02 to | 0.22 (0.12 to | 0.19 (0.08 to | -0.11 (-0.64  | 11.09 (8.34   | 11.03 (7.60  | 0.12 (-0.02   |
| 25 | Republic of)  | to 50.84)     | to 55.07)     | 0.57)         | 0.34)         | 0.24)         | to 0.42)      | to 14.22)     | to 14.22)    | to 0.25)      |
| 26 |               | 19.71 (16.52  | 28.11 (23.22  | 1.43 (1.27 to | 0.29 (0.20 to | 0.19 (0.15 to | -1.58 (-1.76  | 13.75 (9.61   | 10.42 (8.08  | -0.96 (-1.14  |
| 27 | Iraq          | to 23.39)     | to 34.20)     | 1.59)         | 0.42)         | 0.27)         | to -1.39)     | to 19.18)     | to 13.32)    | to -0.78)     |
| 28 |               | 90.59 (75.89  | 97.87 (84.83  | 0.42 (0.35 to | 0.87 (0.76 to | 0.66 (0.53 to | -1.61 (-2.56  | 29.44 (24.40  | 25.50 (20.1  | -0.80 (-1.30  |
| 29 | Ireland       | to 107.72)    | to 112.53)    | 0.49)         | 0.96)         | 0.84)         | to -0.66)     | to 35.63)     | to 32.09)    | to -0.30)     |
| 30 |               | 70.49 (59.79  | 70.21 (62.42  | -0.08 (-0.20  | 0.47 (0.41 to | 0.38 (0.32 to | -1.01 (-1.36  | 21.15 (17.17  | 18.50 (14.69 | -0.65 (-0.76  |
| 31 | Israel        | to 83.85)     | to 78.72)     | to 0.05)      | 0.53)         | 0.51)         | to -0.66)     | to 26.12)     | to 23.20)    | to -0.54)     |
| 32 |               | 261.58        | 227.51        | -0.24 (-0.43  | 0.44 (0.39 to | 0.76 (0.55 to | 2.55 (2.03 to | 49.44 (36.73  | 46.95 (35.41 | 0.17 (0.00 to |
| 33 | Italy         | (226.94 to    | (200.83 to    | to -0.05)     | 0.70)         | 0.85)         | 3.06)         | to 63.71)     | to 59.78)    | 0.34)         |
| 34 |               | 297.14)       | 254.27)       |               |               |               |               |               |              |               |
| 35 | Jamaica       | 29.63 (24.88  | 29.42 (24.46  | 0.15 (0.05 to | 0.30 (0.23 to | 0.24 (0.17 to | -1.45 (-1.78  | 14.86 (11.53  | 11.50 (8.84  | -1.28 (-1.50  |
| 36 |               | to 35.60)     | to 35.27)     | 0.25)         | 0.35)         | 0.33)         | to -1.12)     | to 17.70)     | to 14.50)    | to -1.06)     |
| 37 |               | 151.17        | 291.90        | 1.48 (1.08 to | 0.25 (0.18 to | 0.11 (0.09 to | -2.39 (-2.83  | 27.14 (19.46  | 46.58 (31.41 | 1.21 (0.88 to |
| 38 | Japan         | (125.74 to    | (251.75 to    | 1.88)         | 0.27)         | 0.16)         | to -1.95)     | to 36.26)     | to 63.54)    | 1.54)         |
| 39 |               | 179.69)       | 336.57)       |               |               |               |               |               |              |               |
| 40 |               | 69.20 (60.07  | 113.51        | 2.51 (2.23 to | 0.43 (0.30 to | 0.23 (0.18 to | -2.62 (-2.98  | 20.68 (15.47  | 22.01 (16.06 | 0.46 (0.34 to |
| 41 | Jordan        | to 79.85)     | (95.78 to     | 2.79)         | 0.59)         | 0.30)         | to -2.26)     | to 26.15)     | to 29.65)    | 0.58)         |
| 42 |               |               | 133.87)       |               |               |               |               |               |              |               |
| 43 | Kazakhstan    | 80.02 (67.16  | 81.77 (68.13  | 0.12 (0.06 to | 0.57 (0.41 to | 0.46 (0.37 to | -1.26 (-1.68  | 30.23 (24.06  | 26.97 (21.78 | -0.74 (-1.02  |
| 44 |               | to 96.26)     | to 97.46)     | 0.18)         | 0.72)         | 0.56)         | to -0.85)     | to 37.42)     | to 33.61)    | to -0.45)     |
| 45 |               | 6.80 (5.68 to | 8.33 (6.99 to | 0.31 (0.19 to | 0.81 (0.43 to | 0.84 (0.50 to | 0.31 (0.22 to | 21.25 (13.20  | 21.31 (13.76 | 0.26 (0.16 to |
| 46 | Kenya         | 8.23)         | 10.12)        | 0.42)         | 1.44)         | 1.26)         | 0.40)         | to 36.93)     | to 30.78)    | 0.36)         |
| 47 |               |               |               |               |               |               |               |               |              |               |
| 48 |               |               |               |               |               |               |               |               |              |               |
| 49 |               |               |               |               |               |               |               |               |              |               |
| 50 |               |               |               |               |               |               |               |               |              |               |
| 51 |               |               |               |               |               |               |               |               |              |               |
| 52 |               |               |               |               |               |               |               |               |              |               |
| 53 |               |               |               |               |               |               |               |               |              |               |
| 54 |               |               |               |               |               |               |               |               |              |               |
| 55 |               |               |               |               |               |               |               |               |              |               |
| 56 |               |               |               |               |               |               |               |               |              |               |
| 57 |               |               |               |               |               |               |               |               |              |               |
| 58 |               |               |               |               |               |               |               |               |              |               |
| 59 |               |               |               |               |               |               |               |               |              |               |
| 60 |               |               |               |               |               |               |               |               |              |               |

|    |                                  |                           |                           |                        |                     |                     |                        |                        |                        |                        |
|----|----------------------------------|---------------------------|---------------------------|------------------------|---------------------|---------------------|------------------------|------------------------|------------------------|------------------------|
| 1  |                                  |                           |                           |                        |                     |                     |                        |                        |                        |                        |
| 2  |                                  |                           |                           |                        |                     |                     |                        |                        |                        |                        |
| 3  |                                  |                           |                           |                        |                     |                     |                        |                        |                        |                        |
| 4  | Kiribati                         | 4.05 (3.25 to 4.96)       | 3.55 (2.90 to 4.32)       | -0.69 (-0.88 to -0.51) | 1.81 (0.99 to 2.71) | 1.08 (0.68 to 1.67) | -2.13 (-2.29 to -1.98) | 53.42 (24.47 to 92.59) | 31.83 (17.58 to 55.40) | -2.07 (-2.20 to -1.93) |
| 6  | Kuwait                           | 55.67 (51.70 to 60.02)    | 54.34 (45.07 to 65.64)    | 0.09 (-0.06 to 0.25)   | 0.19 (0.14 to 0.22) | 0.15 (0.12 to 0.20) | -0.66 (-1.06 to -0.25) | 13.39 (10.47 to 16.77) | 11.73 (8.74 to 15.53)  | -0.33 (-0.50 to -0.15) |
| 9  | Kyrgyzstan                       | 73.48 (61.75 to 87.12)    | 73.31 (61.61 to 87.09)    | -0.03 (-0.10 to 0.04)  | 0.42 (0.29 to 0.50) | 0.19 (0.16 to 0.25) | -3.52 (-3.86 to -3.19) | 28 (21.04 to 34.06)    | 17.37 (13.34 to 22.37) | -2.11 (-2.28 to -1.94) |
| 11 | Lao People's Democratic Republic | 2.98 (2.32 to 3.69)       | 3.67 (2.95 to 4.55)       | 0.79 (0.74 to 0.83)    | 0.45 (0.22 to 0.72) | 0.26 (0.14 to 0.41) | -2.40 (-2.60 to -2.19) | 13.04 (6.62 to 19.19)  | 6.97 (4.13 to 11.24)   | -2.47 (-2.65 to -2.30) |
| 16 | Latvia                           | 103.47 (89.32 to 119.13)  | 123.78 (108.48 to 139.23) | 0.42 (0.33 to 0.50)    | 0.34 (0.29 to 0.42) | 0.37 (0.30 to 0.48) | 0.22 (-0.08 to 0.51)   | 25.74 (20.10 to 32.35) | 28.66 (21.84 to 36.61) | 0.14 (-0.02 to 0.29)   |
| 19 | Lebanon                          | 33.16 (27.13 to 41.07)    | 46.20 (37.84 to 56.68)    | 1.23 (1.00 to 1.47)    | 0.14 (0.10 to 0.21) | 0.15 (0.08 to 0.23) | 0.32 (0.10 to 0.55)    | 8.48 (6.32 to 11.24)   | 10.18 (7.34 to 13.75)  | 0.79 (0.65 to 0.93)    |
| 22 | Lesotho                          | 7.67 (6.36 to 9.34)       | 8.77 (7.23 to 10.83)      | 0.48 (0.40 to 0.57)    | 0.55 (0.36 to 0.8)  | 0.69 (0.48 to 0.98) | 1.08 (0.85 to 1.31)    | 16.56 (10.77 to 23.28) | 20.29 (13.61 to 29.06) | 1.06 (0.87 to 1.26)    |
| 24 | Liberia                          | 7.84 (6.42 to 9.75)       | 8.46 (6.99 to 10.34)      | 0.57 (0.33 to 0.80)    | 0.52 (0.23 to 0.92) | 0.42 (0.26 to 0.62) | -0.84 (-1.09 to -0.60) | 19.69 (7.54 to 32.92)  | 13.96 (8.48 to 21.59)  | -1.16 (-1.44 to -0.88) |
| 27 | Libya                            | 23.56 (19.39 to 28.73)    | 25.77 (21.21 to 31.41)    | 0.56 (0.29 to 0.84)    | 0.21 (0.13 to 0.37) | 0.22 (0.15 to 0.31) | 0.11 (-0.02 to 0.24)   | 8.88 (6.41 to 12.85)   | 9.05 (6.69 to 11.82)   | 0.21 (0.11 to 0.31)    |
| 30 | Lithuania                        | 109.21 (95.7 to 123.65)   | 133.41 (123.84 to 142.65) | 0.84 (0.76 to 0.92)    | 0.32 (0.24 to 0.37) | 0.33 (0.26 to 0.42) | 0.13 (-0.20 to 0.47)   | 25.36 (19.61 to 31.92) | 28.75 (21.98 to 36.27) | 0.49 (0.33 to 0.65)    |
| 34 | Luxembourg                       | 166.34 (145.24 to 189.85) | 187.63 (163.86 to 213.76) | 0.37 (0.22 to 0.53)    | 0.96 (0.84 to 1.10) | 0.97 (0.72 to 1.16) | 0.55 (0.30 to 0.80)    | 42.53 (33.57 to 52.29) | 43.90 (33.95 to 55.68) | 0.27 (0.15 to 0.38)    |
| 37 | Madagascar                       | 6.62 (5.44 to 8.22)       | 7.25 (5.99 to 9.04)       | 0.38 (0.29 to 0.48)    | 0.53 (0.32 to 0.88) | 0.59 (0.40 to 0.88) | 0.45 (0.34 to 0.56)    | 17.91 (8.95 to 28.15)  | 16.98 (11.97 to 24.64) | -0.03 (-0.18 to 0.13)  |
| 40 | Malawi                           | 5.73 (4.70 to 7.05)       | 6.33 (5.28 to 7.8)        | 0.44 (0.40 to 0.48)    | 0.71 (0.49 to 1.02) | 0.67 (0.46 to 0.97) | -0.26 (-0.39 to -0.12) | 24.10 (13.49 to 42.83) | 19.08 (13.47 to 26.73) | -0.85 (-1.02 to -0.69) |
| 43 | Malaysia                         | 4.33 (3.64 to 5.05)       | 6.56 (5.71 to 7.56)       | 1.38 (1.19 to 1.57)    | 0.18 (0.14 to 0.22) | 0.17 (0.12 to 0.23) | -0.75 (-1.06 to -0.43) | 5.01 (4.15 to 6.10)    | 4.92 (3.71 to 6.26)    | -0.54 (-0.73 to -0.35) |
| 45 | Maldives                         | 4.10 (3.25 to 4.98)       | 4.94 (3.96 to 5.96)       | 0.74 (0.68 to 0.80)    | 0.53 (0.32 to 0.81) | 0.30 (0.23 to 0.40) | -2.37 (-2.52 to -2.22) | 13.21 (8.16 to 20.38)  | 7.20 (5.69 to 9.23)    | -2.50 (-2.68 to -2.32) |
| 48 | Mali                             | 7.19 (5.85 to 8.93)       | 8.08 (6.68 to 9.79)       | 0.63 (0.48 to 0.79)    | 0.49 (0.20 to 0.89) | 0.47 (0.26 to 0.71) | -0.28 (-0.46 to -0.10) | 19.25 (6.81 to 33.36)  | 16.53 (8.45 to 26.83)  | -0.64 (-0.80 to -0.48) |
| 50 | Malta                            | 66.69 (57.4 to 76.82)     | 72.00 (63.55 to 81.87)    | 0.11 (0.05 to 0.17)    | 0.54 (0.48 to 0.62) | 0.62 (0.48 to 0.74) | 0.78 (0.57 to 0.99)    | 20.61 (16.77 to 24.94) | 22.28 (18.12 to 27.35) | 0.40 (0.30 to 0.50)    |
| 53 | Marshall Islands                 | 4.22 (3.40 to 5.11)       | 4.10 (3.35 to 4.93)       | -0.25 (-0.43 to -0.08) | 1.32 (0.84 to 1.88) | 0.83 (0.50 to 1.31) | -1.90 (-2.04 to -1.76) | 38.63 (23.47 to 58.16) | 24.94 (14.63 to 40.72) | -1.80 (-1.93 to -1.68) |
| 56 | Mauritania                       | 8.95 (7.32 to 10.94)      | 11.87 (9.73 to 14.62)     | 0.85 (0.70 to 0.99)    | 0.68 (0.41 to 0.99) | 0.41 (0.28 to 0.57) | -2.01 (-2.18 to -1.84) | 22.06 (12.99 to 31.74) | 13.42 (9.08 to 18.70)  | -1.97 (-2.14 to -1.80) |
| 58 | Mauritius                        | 4.55 (3.68 to 5.63)       | 5.50 (4.43 to 6.63)       | 0.68 (0.63 to 0.73)    | 0.17 (0.14 to 0.19) | 0.22 (0.17 to 0.28) | 1.44 (1.10 to 1.78)    | 5.3 (4.63 to 6.29)     | 7.7 (5.86 to 9.69)     | 1.88 (1.53 to 2.23)    |



|    |             |                        |                        |                        |                     |                     |                        |                        |                        |                        |
|----|-------------|------------------------|------------------------|------------------------|---------------------|---------------------|------------------------|------------------------|------------------------|------------------------|
| 1  |             |                        |                        |                        |                     |                     |                        |                        |                        |                        |
| 2  |             |                        |                        |                        |                     |                     |                        |                        |                        |                        |
| 3  |             |                        |                        |                        |                     |                     |                        |                        |                        |                        |
| 4  | Mexico      | 47.30 (40.55 to 55.27) | 36.92 (31.76 to 42.73) | -0.82 (-0.97 to -0.67) | 0.34 (0.31 to 0.39) | 0.45 (0.36 to 0.54) | 1.68 (1.33 to 2.02)    | 16.08 (13.61 to 19.12) | 17.13 (14.12 to 20.45) | 0.68 (0.41 to 0.96)    |
| 5  |             |                        |                        |                        |                     |                     |                        |                        |                        |                        |
| 6  | Micronesia  |                        |                        |                        |                     |                     |                        |                        |                        |                        |
| 7  | (Federated  | 4.44 (3.61 to 5.35)    | 4.11 (3.40 to 4.96)    | -0.45 (-0.62 to -0.27) | 1.36 (0.88 to 1.97) | 0.80 (0.48 to 1.32) | -2.09 (-2.29 to -1.88) | 40.59 (25.23 to 65.57) | 23.88 (12.56 to 43.11) | -2.07 (-2.24 to -1.89) |
| 8  | States of)  |                        |                        |                        |                     |                     |                        |                        |                        |                        |
| 9  |             |                        |                        |                        |                     |                     |                        |                        |                        |                        |
| 10 |             | 102.48                 | 110.59                 |                        |                     |                     |                        |                        |                        |                        |
| 11 | Monaco      | (86.41 to 120.82)      | (93.15 to 130.73)      | 0.31 (0.29 to 0.33)    | 0.38 (0.27 to 0.50) | 0.36 (0.27 to 0.47) | -0.07 (-0.15 to 0.01)  | 22.98 (17.18 to 30.02) | 23.10 (17.08 to 29.93) | 0.08 (0.06 to 0.10)    |
| 12 |             |                        |                        |                        |                     |                     |                        |                        |                        |                        |
| 13 |             |                        |                        |                        |                     |                     |                        |                        |                        |                        |
| 14 | Mongolia    | 68.37 (56.95 to 82.11) | 69.72 (57.44 to 83.84) | 0.02 (0.01 to 0.04)    | 0.73 (0.47 to 1.01) | 0.45 (0.33 to 0.61) | -2.10 (-2.26 to -1.94) | 38.19 (25.22 to 51.55) | 24.75 (19.13 to 31.11) | -1.88 (-2.00 to -1.75) |
| 15 |             |                        |                        |                        |                     |                     |                        |                        |                        |                        |
| 16 |             | 135.02                 | 133.80                 |                        |                     |                     |                        |                        |                        |                        |
| 17 | Montenegro  | (114.64 to 158.46)     | (112.95 to 156.37)     | 0.02 (0.00 to 0.05)    | 0.29 (0.23 to 0.37) | 0.30 (0.23 to 0.37) | 0.27 (0.08 to 0.46)    | 29.84 (22.66 to 38.5)  | 28.38 (20.94 to 37.02) | -0.08 (-0.14 to -0.02) |
| 18 |             |                        |                        |                        |                     |                     |                        |                        |                        |                        |
| 19 |             |                        |                        |                        |                     |                     |                        |                        |                        |                        |
| 20 | Morocco     | 15.56 (13.00 to 18.49) | 17.60 (14.69 to 21.00) | 0.60 (0.47 to 0.72)    | 0.23 (0.14 to 0.38) | 0.21 (0.15 to 0.28) | -0.17 (-0.38 to 0.04)  | 8.23 (5.69 to 11.59)   | 7.60 (5.86 to 9.68)    | -0.09 (-0.21 to 0.02)  |
| 21 |             |                        |                        |                        |                     |                     |                        |                        |                        |                        |
| 22 |             |                        |                        |                        |                     |                     |                        |                        |                        |                        |
| 23 | Mozambique  | 5.71 (4.71 to 7.03)    | 6.30 (5.22 to 7.69)    | 0.38 (0.33 to 0.43)    | 0.69 (0.45 to 1.04) | 0.84 (0.58 to 1.20) | 0.94 (0.77 to 1.12)    | 22.30 (13.46 to 36.57) | 24.35 (16.57 to 34.27) | 0.62 (0.41 to 0.84)    |
| 24 |             |                        |                        |                        |                     |                     |                        |                        |                        |                        |
| 25 |             |                        |                        |                        |                     |                     |                        |                        |                        |                        |
| 26 | Myanmar     | 3.09 (2.42 to 3.79)    | 3.71 (3.00 to 4.59)    | 0.72 (0.63 to 0.81)    | 0.22 (0.13 to 0.31) | 0.13 (0.1 to 0.17)  | -1.95 (-2.07 to -1.83) | 7.97 (4.53 to 12.88)   | 4.34 (3.28 to 6.04)    | -2.29 (-2.41 to -2.17) |
| 27 |             |                        |                        |                        |                     |                     |                        |                        |                        |                        |
| 28 | Namibia     | 9.39 (7.72 to 11.59)   | 11.47 (9.48 to 14.12)  | 0.66 (0.54 to 0.77)    | 0.72 (0.50 to 1.00) | 0.63 (0.45 to 0.87) | -0.61 (-0.80 to -0.41) | 21.26 (13.8 to 28.84)  | 18.09 (12.71 to 26.34) | -0.52 (-0.63 to -0.41) |
| 29 |             |                        |                        |                        |                     |                     |                        |                        |                        |                        |
| 30 |             |                        |                        |                        |                     |                     |                        |                        |                        |                        |
| 31 | Nauru       | 5.33 (4.35 to 6.41)    | 5.02 (4.11 to 6.11)    | -0.61 (-0.94 to -0.28) | 1.37 (0.82 to 2.13) | 0.92 (0.54 to 1.45) | -1.85 (-2.09 to -1.61) | 42.03 (22.9 to 73.19)  | 27.18 (13.97 to 47.82) | -1.87 (-2.08 to -1.65) |
| 32 |             |                        |                        |                        |                     |                     |                        |                        |                        |                        |
| 33 |             |                        |                        |                        |                     |                     |                        |                        |                        |                        |
| 34 | Nepal       | 16.18 (12.92 to 20.54) | 18.72 (15.04 to 23.18) | 0.55 (0.50 to 0.59)    | 0.98 (0.57 to 1.86) | 0.59 (0.36 to 0.98) | -1.88 (-2.06 to -1.69) | 28.52 (18.28 to 47.84) | 15.65 (10.93 to 23.88) | -2.15 (-2.36 to -1.94) |
| 35 |             |                        |                        |                        |                     |                     |                        |                        |                        |                        |
| 36 |             | 142.28                 |                        |                        |                     |                     |                        |                        |                        |                        |
| 37 | Netherlands | (129.20 to 155.78)     | 73.64 (63.08 to 85.72) | -2.19 (-2.78 to -1.60) | 1.43 (1.24 to 1.75) | 2.08 (1.58 to 2.40) | 1.35 (0.87 to 1.84)    | 47.17 (39.07 to 56.59) | 41.11 (35.20 to 47.09) | -0.50 (-0.93 to -0.06) |
| 38 |             |                        |                        |                        |                     |                     |                        |                        |                        |                        |
| 39 |             | 160.29                 | 168.32                 |                        |                     |                     |                        |                        |                        |                        |
| 40 |             |                        |                        |                        |                     |                     |                        |                        |                        |                        |
| 41 | New Zealand | (139.19 to 182.59)     | (152.62 to 186.95)     | 0.20 (0.15 to 0.26)    | 0.53 (0.45 to 0.59) | 0.38 (0.32 to 0.46) | -1.70 (-2.05 to -1.34) | 34.31 (26.39 to 43.21) | 31.98 (23.24 to 41.73) | -0.32 (-0.42 to -0.22) |
| 42 |             |                        |                        |                        |                     |                     |                        |                        |                        |                        |
| 43 |             |                        |                        |                        |                     |                     |                        |                        |                        |                        |
| 44 | Nicaragua   | 23.25 (19.28 to 27.88) | 26.41 (22.30 to 31.28) | 0.20 (0.10 to 0.31)    | 0.15 (0.12 to 0.18) | 0.17 (0.13 to 0.21) | 0.48 (0.30 to 0.67)    | 7.80 (6.25 to 9.75)    | 8.26 (6.41 to 10.34)   | 0.12 (-0.02 to 0.25)   |
| 45 |             |                        |                        |                        |                     |                     |                        |                        |                        |                        |
| 46 |             |                        |                        |                        |                     |                     |                        |                        |                        |                        |
| 47 | Niger       | 7.12 (5.75 to 8.74)    | 7.75 (6.26 to 9.48)    | 0.37 (0.26 to 0.48)    | 0.58 (0.28 to 0.99) | 0.5 (0.29 to 0.79)  | -0.71 (-0.92 to -0.51) | 21.59 (8.82 to 38.22)  | 17.16 (9.15 to 26.85)  | -1.08 (-1.30 to -0.86) |
| 48 |             |                        |                        |                        |                     |                     |                        |                        |                        |                        |
| 49 | Nigeria     | 8.88 (7.36 to 10.86)   | 11.03 (9.13 to 13.41)  | 0.98 (0.83 to 1.14)    | 0.57 (0.28 to 0.97) | 0.52 (0.28 to 0.83) | -0.11 (-0.21 to -0.02) | 19.98 (11.19 to 32.55) | 17.08 (10.24 to 26.72) | -0.43 (-0.51 to -0.35) |
| 50 |             |                        |                        |                        |                     |                     |                        |                        |                        |                        |
| 51 |             |                        |                        |                        |                     |                     |                        |                        |                        |                        |
| 52 | Niue        | 5.82 (4.77 to 7.03)    | 5.53 (4.56 to 6.74)    | -0.24 (-0.39 to -0.08) | 0.96 (0.67 to 1.38) | 0.63 (0.38 to 0.91) | -1.75 (-1.86 to -1.63) | 29.80 (19.61 to 46.61) | 19.00 (10.29 to 29.66) | -1.92 (-2.07 to -1.78) |
| 53 |             |                        |                        |                        |                     |                     |                        |                        |                        |                        |
| 54 |             | 119.00                 | 122.13                 |                        |                     |                     |                        |                        |                        |                        |
| 55 | North       | (100.79 to 140.81)     | (103.27 to 143.78)     | 0.14 (0.12 to 0.17)    | 0.20 (0.15 to 0.25) | 0.18 (0.13 to 0.23) | -0.21 (-0.36 to -0.07) | 23.91 (17.63 to 31.43) | 23.32 (16.99 to 31.08) | 0.00 (-0.04 to 0.05)   |
| 56 | Macedonia   |                        |                        |                        |                     |                     |                        |                        |                        |                        |
| 57 |             |                        |                        |                        |                     |                     |                        |                        |                        |                        |
| 58 | Northern    | 6.60 (5.47 to 7.98)    | 5.79 (4.80 to 6.96)    | -0.61 (-0.80 to -0.42) | 1.28 (0.85 to 1.82) | 0.38 (0.26 to 0.73) | -4.76 (-5.32 to -4.19) | 34.73 (23.54 to 50.03) | 11.56 (7.82 to 20.63)  | -4.28 (-4.78 to -3.78) |
| 59 | Mariana     |                        |                        |                        |                     |                     |                        |                        |                        |                        |
| 60 |             |                        |                        |                        |                     |                     |                        |                        |                        |                        |



|    |                 |               |               |               |               |               |               |               |               |               |
|----|-----------------|---------------|---------------|---------------|---------------|---------------|---------------|---------------|---------------|---------------|
| 1  |                 |               |               |               |               |               |               |               |               |               |
| 2  |                 |               |               |               |               |               |               |               |               |               |
| 3  | Islands         |               |               |               |               |               |               |               |               |               |
| 4  |                 | 406.73        | 498.95        |               |               |               |               |               |               |               |
| 5  |                 | (342.53 to    | (429.41 to    | 0.38 (0.24 to | 0.43 (0.39 to | 0.38 (0.32 to | -0.86 (-1.19  | 69.15 (49.57  | 80.37 (56.25  | 0.17 (0.01 to |
| 6  | Norway          | 478.15)       | 570.55)       | 0.52)         | 0.58)         | 0.52)         | to -0.53)     | to 92.09)     | to 108.56)    | 0.33)         |
| 7  |                 |               |               |               |               |               |               |               |               |               |
| 8  |                 |               |               |               |               |               |               |               |               |               |
| 9  | Oman            | 32.04 (26.30  | 33.81 (27.79  | 0.24 (0.08 to | 0.23 (0.12 to | 0.23 (0.15 to | 0.58 (0.34 to | 10.5 (7.14 to | 9.96 (7.66 to | 0.17 (0.00 to |
| 10 |                 | to 38.55)     | to 40.80)     | 0.40)         | 0.39)         | 0.34)         | 0.82)         | 15.11)        | 12.72)        | 0.35)         |
| 11 |                 |               |               |               |               |               |               |               |               |               |
| 12 | Pakistan        | 13.75 (11.11  | 16.77 (13.78  | 0.77 (0.72 to | 0.78 (0.39 to | 0.62 (0.41 to | -0.87 (-0.93  | 21.52 (12.69  | 17.80 (12.91  | -0.71 (-0.77  |
| 13 |                 | to 17.15)     | to 21.25)     | 0.81)         | 1.57)         | 0.99)         | to -0.80)     | to 38.34)     | to 25.37)     | to -0.66)     |
| 14 | Palau           | 5.62 (4.60 to | 5.22 (4.30 to | -0.40 (-0.56  | 0.88 (0.53 to | 0.62 (0.29 to | -1.36 (-1.47  | 26.21 (13.51  | 19.34 (8.32   | -1.21 (-1.31  |
| 15 |                 | 6.79)         | 6.32)         | to -0.24)     | 1.46)         | 0.97)         | to -1.24)     | to 47.84)     | to 32.27)     | to -1.10)     |
| 16 |                 |               |               |               |               |               |               |               |               |               |
| 17 | Palestine       | 31.49 (25.86  | 35.42 (29.15  | 0.71 (0.52 to | 0.33 (0.23 to | 0.20 (0.15 to | -2.83 (-3.48  | 11.67 (8.60   | 9.47 (7.18 to | -1.16 (-1.42  |
| 18 |                 | to 38.19)     | to 42.61)     | 0.90)         | 0.50)         | 0.29)         | to -2.18)     | to 16.06)     | 12.75)        | to -0.90)     |
| 19 |                 |               |               |               |               |               |               |               |               |               |
| 19 | Panama          | 30.64 (26.19  | 31.9 (26.95   | 0.09 (0.04 to | 0.40 (0.33 to | 0.59 (0.45 to | 2.20 (1.67 to | 19.61 (16.04  | 24.28 (18.4   | 1.57 (1.10 to |
| 20 |                 | to 35.44)     | to 37.19)     | 0.14)         | 0.57)         | 0.76)         | 2.73)         | to 24.02)     | to 31.52)     | 2.05)         |
| 21 |                 |               |               |               |               |               |               |               |               |               |
| 22 | Papua New       | 4.05 (3.24 to | 3.65 (2.96 to | -0.52 (-0.69  | 0.54 (0.31 to | 0.42 (0.27 to | -1.02 (-1.10  | 19.34 (11.2   | 14.68 (9.5 to | -1.09 (-1.18  |
| 23 | Guinea          | 4.88)         | 4.45)         | to -0.35)     | 0.80)         | 0.63)         | to -0.93)     | to 29.45)     | 21.87)        | to -1.00)     |
| 24 |                 |               |               |               |               |               |               |               |               |               |
| 24 | Paraguay        | 35.78 (30.69  | 30.96 (26.24  | -0.62 (-0.73  | 0.16 (0.13 to | 0.21 (0.15 to | 1.35 (1.08 to | 10.62 (8.39   | 10.30 (7.70   | 0.12 (-0.06   |
| 25 |                 | to 41.49)     | to 36.59)     | to -0.50)     | 0.21)         | 0.28)         | 1.63)         | to 13.36)     | to 13.16)     | to 0.29)      |
| 26 |                 |               |               |               |               |               |               |               |               |               |
| 27 | Peru            | 17.18 (14.20  | 16.74 (13.74  | -0.14 (-0.17  | 0.69 (0.47 to | 0.23 (0.16 to | -4.20 (-4.68  | 34.79 (19.65  | 9.31 (6.89 to | -5.08 (-5.69  |
| 28 |                 | to 20.56)     | to 20.14)     | to -0.10)     | 0.93)         | 0.32)         | to -3.72)     | to 53.77)     | 12.58)        | to -4.47)     |
| 29 |                 |               |               |               |               |               |               |               |               |               |
| 29 | Philippines     | 4.47 (3.59 to | 4.96 (4.02 to | 0.35 (0.25 to | 0.35 (0.16 to | 0.16 (0.13 to | -3.25 (-3.54  | 8.94 (5.36 to | 4.87 (4.06 to | -2.61 (-2.86  |
| 30 |                 | 5.38)         | 6.00)         | 0.46)         | 0.46)         | 0.20)         | to -2.95)     | 11.07)        | 6.26)         | to -2.35)     |
| 31 |                 |               |               |               |               |               |               |               |               |               |
| 32 |                 | 418.60        | 177.25        |               |               |               |               |               |               |               |
| 33 | Poland          | (351.62 to    | (157.39 to    | -3.73 (-4.52  | 0.44 (0.41 to | 0.53 (0.42 to | 0.82 (0.68 to | 72.05 (51.85  | 38.44 (29.32  | -2.70 (-3.28  |
| 34 |                 | 498.71)       | 199.48)       | to -2.94)     | 0.51)         | 0.62)         | 0.96)         | to 95.72)     | to 49.04)     | to -2.11)     |
| 35 |                 |               |               |               |               |               |               |               |               |               |
| 36 | Portugal        | 52.37 (46.30  | 74.24 (66.91  | 0.72 (0.46 to | 0.69 (0.60 to | 1.06 (0.57 to | 2.38 (1.99 to | 20.51 (17.46  | 27.82 (20.23  | 1.24 (1.07 to |
| 37 |                 | to 58.76)     | to 82.44)     | 0.99)         | 0.76)         | 1.24)         | 2.77)         | to 24.14)     | to 33.05)     | 1.41)         |
| 38 |                 |               |               |               |               |               |               |               |               |               |
| 39 | Puerto Rico     | 31.12 (29.32  | 30.88 (28.28  | 0.00 (-0.04   | 0.56 (0.43 to | 0.27 (0.19 to | -3.70 (-4.28  | 21.05 (16.43  | 12.28 (9.43   | -2.69 (-3.09  |
| 40 |                 | to 33.10)     | to 33.59)     | to 0.04)      | 0.64)         | 0.41)         | to -3.10)     | to 24.23)     | to 16.08)     | to -2.29)     |
| 41 |                 |               |               |               |               |               |               |               |               |               |
| 41 | Qatar           | 38.47 (31.44  | 44.46 (36.75  | 0.53 (0.42 to | 0.37 (0.24 to | 0.34 (0.21 to | 0.52 (0.07 to | 14.06 (10.55  | 13.06 (9.28   | 0.13 (-0.12   |
| 42 |                 | to 45.79)     | to 53.66)     | 0.64)         | 0.59)         | 0.51)         | 0.98)         | to 19.68)     | to 17.59)     | to 0.37)      |
| 43 |                 |               |               |               |               |               |               |               |               |               |
| 44 | Republic of     | 37.89 (33.49  | 70.21 (66.03  | 1.25 (0.89 to | 1.76 (0.56 to | 0.30 (0.23 to | -7.96 (-8.67  | 31.72 (18.30  | 15 (11.13 to  | -3.63 (-4.02  |
| 45 | Korea           | to 42.88)     | to 74.79)     | 1.61)         | 2.34)         | 0.39)         | to -7.25)     | to 38.85)     | 19.33)        | to -3.23)     |
| 46 |                 |               |               |               |               |               |               |               |               |               |
| 46 | Republic of     | 67.21 (55.76  | 66.12 (59.51  | 0.47 (0.09 to | 0.38 (0.32 to | 0.33 (0.27 to | -0.60 (-0.96  | 22.87 (18.45  | 20.72 (16.98  | -0.20 (-0.52  |
| 47 |                 | to 80.49)     | to 73.09)     | 0.85)         | 0.47)         | 0.39)         | to -0.25)     | to 27.69)     | to 25.12)     | to 0.13)      |
| 48 | Moldova         |               |               |               |               |               |               |               |               |               |
| 49 | Romania         | 70.01 (58.65  | 70.93 (63.66  | 0.37 (0.16 to | 0.27 (0.23 to | 0.23 (0.18 to | -0.65 (-1.01  | 21.99 (17.23  | 17.97 (13.92  | -0.63 (-0.89  |
| 50 |                 | to 82.51)     | to 79.55)     | 0.59)         | 0.31)         | 0.28)         | to -0.29)     | to 27.18)     | to 22.6)      | to -0.37)     |
| 51 |                 |               |               |               |               |               |               |               |               |               |
| 51 | Russian         | 95.59 (81.25  | 85.89 (72.98  | -0.12 (-0.25  | 0.57 (0.42 to | 0.56 (0.46 to | -0.40 (-0.74  | 30.76 (24.06  | 28.04 (22.97  | -0.52 (-0.70  |
| 52 |                 | to 111.84)    | to 100.35)    | to 0.00)      | 0.66)         | 0.66)         | to -0.06)     | to 37.42)     | to 34.48)     | to -0.35)     |
| 53 | Federation      |               |               |               |               |               |               |               |               |               |
| 54 |                 |               |               |               |               |               |               |               |               |               |
| 54 | Rwanda          | 6.69 (5.55 to | 7.89 (6.47 to | 0.57 (0.40 to | 0.92 (0.61 to | 0.65 (0.42 to | -1.79 (-2.06  | 29.08 (17.93  | 19.33 (12.66  | -1.92 (-2.15  |
| 55 |                 | 8.31)         | 9.74)         | 0.74)         | 1.40)         | 0.92)         | to -1.51)     | to 46.16)     | to 28.48)     | to -1.69)     |
| 56 |                 |               |               |               |               |               |               |               |               |               |
| 57 | Saint Kitts and | 29.59 (24.68  | 28.95 (23.75  | 0.06 (-0.02   | 2.25 (1.70 to | 1.44 (1.06 to | -2.01 (-2.26  | 67.93 (52.91  | 42.16 (29.05  | -2.07 (-2.32  |
| 58 | Nevis           | to 35.93)     | to 35.61)     | to 0.14)      | 2.63)         | 2.05)         | to -1.76)     | to 79.57)     | to 61.00)     | to -1.82)     |
| 59 | Saint Lucia     | 25.70 (21.15  | 27.48 (22.74  | 0.32 (0.22 to | 0.99 (0.78 to | 0.65 (0.51 to | -2.24 (-2.69  | 32.61 (26.63  | 22.26 (17.86  | -1.84 (-2.19  |
| 60 |                 |               |               |               |               |               |               |               |               |               |

|    |               |               |               |               |               |               |               |               |               |               |
|----|---------------|---------------|---------------|---------------|---------------|---------------|---------------|---------------|---------------|---------------|
| 1  |               |               |               |               |               |               |               |               |               |               |
| 2  |               |               |               |               |               |               |               |               |               |               |
| 3  |               | to 31.22)     | to 33.54)     | 0.42)         | 1.15)         | 0.84)         | to -1.78)     | to 37.29)     | to 28.14)     | to -1.49)     |
| 4  |               |               |               |               |               |               |               |               |               |               |
| 5  | Saint Vincent | 24.91 (20.72  | 24.40 (20.24  | 0.24 (0.13 to | 1.31 (1.08 to | 1.22 (0.98 to | -0.56 (-0.70  | 44.25 (37.35  | 38.61 (31.46  | -0.80 (-0.94  |
| 6  | and the       | to 30.36)     | to 29.76)     | 0.34)         | 1.57)         | 1.53)         | to -0.41)     | to 51.61)     | to 48.07)     | to -0.67)     |
| 7  | Grenadines    |               |               |               |               |               |               |               |               |               |
| 8  |               |               |               |               |               |               |               |               |               |               |
| 9  | Samoa         | 5.60 (4.60 to | 4.77 (3.92 to | -0.77 (-1.05  | 0.98 (0.66 to | 0.63 (0.45 to | -1.64 (-1.80  | 27.95 (18.61  | 17.97 (11.92  | -1.62 (-1.75  |
| 10 |               | 6.71)         | 5.78)         | to -0.49)     | 1.49)         | 0.85)         | to -1.47)     | to 40.58)     | to 26.18)     | to -1.49)     |
| 11 |               | 107.02        | 112.86        |               |               |               |               |               |               |               |
| 12 | San Marino    | (89.88 to     | (94.72 to     | 0.23 (0.21 to | 0.37 (0.27 to | 0.36 (0.22 to | 0.22 (0.06 to | 21.57 (15.79  | 21.79 (15.52  | 0.15 (0.11 to |
| 13 |               | 126.67)       | 132.67)       | 0.24)         | 0.48)         | 0.53)         | 0.38)         | to 28.34)     | to 28.71)     | 0.19)         |
| 14 |               |               |               |               |               |               |               |               |               |               |
| 15 | Sao Tome and  | 10.50 (8.66   | 11.85 (9.61   | 0.59 (0.46 to | 0.46 (0.26 to | 0.31 (0.21 to | -1.58 (-1.93  | 15.7 (9.25 to | 10.34 (7.41   | -1.71 (-2.03  |
| 16 | Principe      | to 12.87)     | to 14.64)     | 0.71)         | 0.73)         | 0.50)         | to -1.24)     | 23.73)        | to 15.57)     | to -1.38)     |
| 17 |               |               |               |               |               |               |               |               |               |               |
| 18 | Saudi Arabia  | 33.86 (28.47  | 34.43 (28.66  | 0.22 (0.09 to | 0.19 (0.11 to | 0.15 (0.11 to | -0.60 (-0.71  | 9.73 (6.96 to | 8.9 (6.65 to  | -0.18 (-0.25  |
| 19 |               | to 40.38)     | to 41.36)     | 0.35)         | 0.31)         | 0.21)         | to -0.48)     | 13.65)        | 11.75)        | to -0.10)     |
| 20 |               |               |               |               |               |               |               |               |               |               |
| 21 | Senegal       | 8.06 (6.57 to | 8.84 (7.25 to | 0.39 (0.27 to | 0.55 (0.29 to | 0.43 (0.27 to | -1.00 (-1.21  | 18.61 (9.28   | 14.15 (8.71   | -1.12 (-1.32  |
| 22 |               | 9.88)         | 11.10)        | 0.51)         | 0.93)         | 0.65)         | to -0.78)     | to 29.66)     | to 21.53)     | to -0.91)     |
| 23 |               | 118.24        | 151.50        |               |               |               |               |               |               |               |
| 24 | Serbia        | (99.70 to     | (130.14 to    | 0.43 (0.26 to | 0.49 (0.37 to | 0.76 (0.50 to | 2.49 (2.05 to | 31.72 (24.28  | 39.47 (29.72  | 0.83 (0.67 to |
| 25 |               | 138.39)       | 173.84)       | 0.61)         | 0.78)         | 0.97)         | 2.94)         | to 43.38)     | to 49.82)     | 0.98)         |
| 26 |               |               |               |               |               |               |               |               |               |               |
| 27 | Seychelles    | 4.66 (3.75 to | 5.45 (4.43 to | 0.52 (0.44 to | 0.30 (0.19 to | 0.22 (0.16 to | -1.44 (-1.65  | 8.38 (5.69 to | 6.28 (4.77 to | -1.35 (-1.51  |
| 28 |               | 5.71)         | 6.55)         | 0.60)         | 0.38)         | 0.30)         | to -1.23)     | 10.68)        | 7.85)         | to -1.19)     |
| 29 |               |               |               |               |               |               |               |               |               |               |
| 30 | Sierra Leone  | 7.33 (6.06 to | 8.45 (6.95 to | 0.64 (0.51 to | 0.42 (0.19 to | 0.43 (0.24 to | 0.20 (-0.07   | 15.88 (6.30   | 15.30 (8.12   | 0.00 (-0.27   |
| 31 |               | 9.02)         | 10.53)        | 0.77)         | 0.72)         | 0.61)         | to 0.48)      | to 28.04)     | to 23.35)     | to 0.26)      |
| 32 |               |               |               |               |               |               |               |               |               |               |
| 33 | Singapore     | 47.14 (38.3   | 41.88 (34.28  | -0.58 (-0.74  | 0.18 (0.14 to | 0.07 (0.06 to | -3.18 (-3.41  | 12.19 (9.33   | 8.16 (5.69 to | -1.52 (-1.73  |
| 34 |               | to 56.56)     | to 51.91)     | to -0.43)     | 0.20)         | 0.11)         | to -2.95)     | to 15.58)     | 11.25)        | to -1.31)     |
| 35 |               | 165.72        | 154.57        |               |               |               |               |               |               |               |
| 36 | Slovakia      | (148.05 to    | (140.40 to    | -0.05 (-0.12  | 0.54 (0.45 to | 0.68 (0.48 to | 1.56 (1.21 to | 40.62 (31.28  | 40.31 (30.39  | 0.34 (0.19 to |
| 37 |               | 183.09)       | 170.08)       | to 0.02)      | 0.84)         | 0.90)         | 1.91)         | to 53.36)     | to 50.67)     | 0.49)         |
| 38 |               | 167.07        | 179.18        |               |               |               |               |               |               |               |
| 39 | Slovenia      | (146.63 to    | (160.70 to    | 0.15 (0.08 to | 0.44 (0.33 to | 0.39 (0.28 to | -1.39 (-2.13  | 34.68 (25.60  | 34.27 (24.57  | -0.42 (-0.67  |
| 40 |               | 189.8)        | 199.69)       | 0.21)         | 0.56)         | 0.52)         | to -0.65)     | to 44.77)     | to 44.81)     | to -0.17)     |
| 41 |               |               |               |               |               |               |               |               |               |               |
| 42 | Solomon       | 3.49 (2.80 to | 3.35 (2.73 to | -0.31 (-0.46  | 0.75 (0.42 to | 0.53 (0.33 to | -1.42 (-1.56  | 24.39 (12.55  | 17.28 (10.22  | -1.38 (-1.51  |
| 43 | Islands       | 4.25)         | 4.12)         | to -0.15)     | 1.16)         | 0.79)         | to -1.29)     | to 43.26)     | to 29.48)     | to -1.25)     |
| 44 |               |               |               |               |               |               |               |               |               |               |
| 45 | Somalia       | 5.39 (4.41 to | 5.28 (4.33 to | -0.09 (-0.12  | 0.55 (0.29 to | 0.48 (0.30 to | -0.45 (-0.53  | 17.8 (7.75 to | 14.47 (8.44   | -0.63 (-0.69  |
| 46 |               | 6.68)         | 6.56)         | to -0.06)     | 0.91)         | 0.79)         | to -0.37)     | 34.12)        | to 24.4)      | to -0.56)     |
| 47 |               |               |               |               |               |               |               |               |               |               |
| 48 | South Africa  | 11.04 (9.21   | 12.40 (10.36  | 0.52 (0.44 to | 0.39 (0.30 to | 0.39 (0.30 to | 0.13 (-0.38   | 15.07 (10.33  | 12.17 (9.76   | -0.56 (-0.99  |
| 49 |               | to 13.55)     | to 15.05)     | 0.60)         | 0.50)         | 0.47)         | to 0.64)      | to 20.06)     | to 14.04)     | to -0.14)     |
| 50 |               |               |               |               |               |               |               |               |               |               |
| 51 | South Sudan   | 6.93 (5.69 to | 7.78 (6.41 to | 0.35 (0.31 to | 0.68 (0.39 to | 0.65 (0.36 to | -0.05 (-0.09  | 22.59 (10.42  | 19.12 (11.06  | -0.45 (-0.58  |
| 52 |               | 8.55)         | 9.49)         | 0.40)         | 1.43)         | 1.40)         | to 0.00)      | to 43.44)     | to 39.88)     | to -0.32)     |
| 53 |               |               | 134.10        |               |               |               |               |               |               |               |
| 54 | Spain         | 90.41 (86.16  | (127.51 to    | 0.77 (0.60 to | 0.54 (0.46 to | 0.35 (0.29 to | -2.16 (-2.54  | 24.91 (20.33  | 27.31 (20.61  | -0.26 (-0.47  |
| 55 |               | to 94.9)      | 141.19)       | 0.95)         | 0.60)         | 0.50)         | to -1.78)     | to 30.25)     | to 34.99)     | to -0.05)     |
| 56 |               |               |               |               |               |               |               |               |               |               |
| 57 | Sri Lanka     | 5.98 (4.90 to | 9.51 (8.29 to | 1.67 (1.38 to | 0.18 (0.14 to | 0.10 (0.07 to | -2.15 (-2.31  | 5.73 (4.38 to | 3.77 (2.86 to | -1.45 (-1.57  |
| 58 |               | 7.28)         | 10.90)        | 1.96)         | 0.23)         | 0.13)         | to -1.99)     | 7.09)         | 4.79)         | to -1.33)     |
| 59 | Sudan         | 25.18 (20.47  | 30.96 (25.17  | 0.90 (0.76 to | 0.21 (0.10 to | 0.25 (0.14 to | 0.95 (0.78 to | 9.58 (5.87 to | 10.84 (7.56   | 0.71 (0.58 to |
| 60 |               |               |               |               |               |               |               |               |               |               |

|    |              |               |               |               |               |               |               |               |               |               |
|----|--------------|---------------|---------------|---------------|---------------|---------------|---------------|---------------|---------------|---------------|
| 1  |              |               |               |               |               |               |               |               |               |               |
| 2  |              |               |               |               |               |               |               |               |               |               |
| 3  |              | to 31.02)     | to 37.98)     | 1.05)         | 0.39)         | 0.43)         | 1.11)         | 15.53)        | to 15.32)     | 0.84)         |
| 4  |              | 25.78 (21.39  | 25.28 (20.76  | 0.11 (0.01 to | 1.00 (0.77 to | 0.66 (0.50 to | -1.99 (-2.24  | 35.66 (26.78  | 23.00 (18.20  | -1.99 (-2.24  |
| 5  | Suriname     | to 31.18)     | to 30.88)     | 0.22)         | 1.18)         | 0.86)         | to -1.73)     | to 43.03)     | to 29.10)     | to -1.75)     |
| 6  |              | 294.18        | 315.22        |               |               |               |               |               |               |               |
| 7  |              | (253.51 to    | (271.18 to    | 0.31 (0.28 to | 0.68 (0.56 to | 0.38 (0.31 to | -3.16 (-4.26  | 56.12 (41.20  | 53.00 (37.35  | -0.35 (-0.54  |
| 8  | Sweden       | 336.93)       | 360.86)       | 0.34)         | 0.75)         | 0.56)         | to -2.06)     | to 73.41)     | to 71.73)     | to -0.16)     |
| 9  |              | 129.02        | 134.73        |               |               |               |               |               |               |               |
| 10 |              | (116.30 to    | (121.98 to    | 0.09 (0.06 to | 0.68 (0.54 to | 0.58 (0.47 to | -1.03 (-1.80  | 32.21 (25.49  | 29.51 (22.30  | -0.56 (-0.82  |
| 11 | Switzerland  | 142.70)       | 148.05)       | 0.12)         | 0.77)         | 0.75)         | to -0.26)     | to 39.69)     | to 37.67)     | to -0.31)     |
| 12 |              | 28.71 (23.39  | 33.67 (27.34  | 0.96 (0.65 to | 0.46 (0.23 to | 0.36 (0.19 to | -1.00 (-1.20  | 14.71 (9.86   | 12.75 (9.00   | -0.46 (-0.53  |
| 13 | Syrian Arab  | to 35.03)     | to 40.47)     | 1.26)         | 0.76)         | 0.52)         | to -0.80)     | to 20.18)     | to 16.93)     | to -0.39)     |
| 14 | Republic     |               |               |               |               |               |               |               |               |               |
| 15 | Taiwan       | 11.23 (9.74   | 27.80 (24.80  | 4.29 (3.71 to | 0.91 (0.57 to | 0.50 (0.38 to | -2.08 (-3.37  | 17.35 (12.32  | 12.40 (10.06  | -0.85 (-1.78  |
| 16 | (Province of | to 12.86)     | to 31.28)     | 4.86)         | 1.04)         | 0.65)         | to -0.78)     | to 19.43)     | to 15.44)     | to 0.10)      |
| 17 | China)       |               |               |               |               |               |               |               |               |               |
| 18 | Tajikistan   | 68.84 (56.59  | 71.19 (59.54  | 0.12 (0.07 to | 0.41 (0.28 to | 0.3 (0.22 to  | -0.79 (-0.88  | 30.29 (19.52  | 20.60 (15.55  | -0.89 (-1.10  |
| 19 |              | to 83.10)     | to 85.49)     | 0.18)         | 0.58)         | 0.41)         | to -0.70)     | to 43.28)     | to 26.90)     | to -0.69)     |
| 20 |              | 3.31 (2.57 to | 4.28 (3.44 to | 0.96 (0.83 to | 0.2 (0.14 to  | 0.12 (0.08 to | -2.46 (-2.78  | 6.06 (4.39 to | 3.64 (2.76 to | -2.40 (-2.71  |
| 21 | Thailand     | 4.15)         | 5.22)         | 1.08)         | 0.26)         | 0.15)         | to -2.14)     | 7.89)         | 4.68)         | to -2.09)     |
| 22 |              | 3.20 (2.51 to | 3.90 (3.14 to | 0.84 (0.75 to | 0.42 (0.17 to | 0.36 (0.20 to | -0.57 (-0.70  | 11.64 (5.58   | 9.14 (5.17 to | -0.95 (-1.13  |
| 23 | Timor-Leste  | 3.91)         | 4.72)         | 0.94)         | 0.83)         | 0.61)         | to -0.44)     | to 22.42)     | 14.89)        | to -0.77)     |
| 24 |              | 9.42 (7.74 to | 9.00 (7.38 to | 0.03 (-0.09   | 0.49 (0.28 to | 0.48 (0.32 to | -0.05 (-0.31  | 17.29 (9.05   | 16.30 (10.74  | -0.23 (-0.48  |
| 25 | Togo         | 11.41)        | 11.07)        | to 0.15)      | 0.76)         | 0.68)         | to 0.21)      | to 26.59)     | to 22.75)     | to 0.01)      |
| 26 |              | 4.65 (3.78 to | 5.36 (4.37 to | 0.72 (0.46 to | 0.89 (0.57 to | 0.58 (0.42 to | -1.72 (-1.88  | 25.84 (15.77  | 16.11 (11.19  | -1.68 (-1.80  |
| 27 | Tokelau      | 5.66)         | 6.54)         | 0.97)         | 1.34)         | 0.78)         | to -1.57)     | to 38.77)     | to 22.98)     | to -1.56)     |
| 28 |              | 5.55 (4.56 to | 4.96 (4.08 to | -0.51 (-0.69  | 1.14 (0.67 to | 0.76 (0.56 to | -1.73 (-1.92  | 31.30 (19.82  | 21.58 (15.55  | -1.63 (-1.83  |
| 29 | Tonga        | 6.66)         | 5.98)         | to -0.32)     | 1.64)         | 1.02)         | to -1.54)     | to 44.12)     | to 30.10)     | to -1.44)     |
| 30 | Trinidad and | 27.68 (22.88  | 27.49 (22.91  | 0.31 (0.17 to | 0.34 (0.24 to | 0.29 (0.21 to | -0.98 (-1.25  | 14.27 (10.86  | 12.54 (9.51   | -0.66 (-0.84  |
| 31 | Tobago       | to 33.63)     | to 33.71)     | 0.45)         | 0.39)         | 0.39)         | to -0.72)     | to 16.75)     | to 16.14)     | to -0.48)     |
| 32 |              | 35.29 (29.00  | 40.47 (33.21  | 0.59 (0.45 to | 0.15 (0.1 to  | 0.14 (0.09 to | -0.05 (-0.15  | 9.05 (6.50 to | 9.36 (6.89 to | 0.27 (0.17 to |
| 33 | Tunisia      | to 42.68)     | to 49.35)     | 0.73)         | 0.22)         | 0.20)         | to 0.06)      | 12.22)        | 12.40)        | 0.37)         |
| 34 |              | 50.66 (44.42  | 98.87 (84.96  | 2.04 (1.87 to | 0.67 (0.43 to | 0.40 (0.30 to | -1.87 (-2.02  | 27.88 (19.30  | 25.05 (19.42  | -0.61 (-0.70  |
| 35 | Turkey       | to 56.99)     | to 113.45)    | 2.20)         | 1.06)         | 0.56)         | to -1.72)     | to 38.53)     | to 32.24)     | to -0.51)     |
| 36 |              | 69.03 (57.31  | 77.89 (64.42  | 0.43 (0.32 to | 0.37 (0.28 to | 0.33 (0.22 to | -0.50 (-0.78  | 24.59 (17.78  | 22.90 (16.63  | -0.20 (-0.38  |
| 37 | Turkmenistan | to 82.24)     | to 92.76)     | 0.54)         | 0.49)         | 0.46)         | to -0.21)     | to 31.67)     | to 29.27)     | to -0.02)     |
| 38 |              | 4.48 (3.63 to | 4.08 (3.38 to | -0.47 (-0.63  | 1.08 (0.65 to | 0.71 (0.47 to | -1.60 (-1.73  | 33.30 (17.86  | 21.17 (13.37  | -1.65 (-1.76  |
| 39 | Tuvalu       | 5.44)         | 4.88)         | to -0.30)     | 1.59)         | 1.05)         | to -1.47)     | to 54.06)     | to 33.22)     | to -1.55)     |
| 40 |              | 5.79 (4.75 to | 7.14 (5.88 to | 1.01 (0.88 to | 0.59 (0.37 to | 0.61 (0.40 to | -0.03 (-0.17  | 17.22 (11.39  | 17.40 (12.18  | -0.02 (-0.16  |
| 41 | Uganda       | 7.14)         | 8.92)         | 1.15)         | 0.91)         | 0.92)         | to 0.10)      | to 25.60)     | to 25.46)     | to 0.13)      |
| 42 |              | 68.71 (57.64  | 68 (57.27 to  | 0.19 (0.03 to | 0.34 (0.26 to | 0.39 (0.31 to | 0.17 (-0.10   | 21.06 (16.76  | 23.62 (18.99  | 0.34 (0.12 to |
| 43 | Ukraine      | to 82.57)     | 80.79)        | 0.35)         | 0.45)         | 0.48)         | to 0.44)      | to 26.65)     | to 28.82)     | 0.56)         |
| 44 |              | 36.50 (30.28  | 42.72 (35.58  | 0.73 (0.60 to | 0.21 (0.09 to | 0.24 (0.15 to | 0.72 (0.25 to | 10.79 (6.88   | 12.40 (8.88   | 0.73 (0.52 to |
| 45 | United Arab  | to 44.12)     | to 51.97)     | 0.87)         | 0.43)         | 0.43)         | 1.20)         | to 16.90)     | to 17.45)     | 0.94)         |
| 46 | Emirates     | 223.81        | 240.37        | 0.17 (0.12 to | 0.97 (0.85 to | 1.30 (1.12 to | 1.22 (0.84 to | 52.80 (41.67  | 59.34 (47.21  | 0.41 (0.25 to |
| 47 | United       | (197.49 to    | (214.96 to    | 0.21)         | 1.18)         | 1.44)         | 1.59)         | to 65.37)     | to 72.73)     | 0.57)         |
| 48 | Kingdom      |               |               |               |               |               |               |               |               |               |
| 49 |              |               |               |               |               |               |               |               |               |               |
| 50 |              |               |               |               |               |               |               |               |               |               |
| 51 |              |               |               |               |               |               |               |               |               |               |
| 52 |              |               |               |               |               |               |               |               |               |               |
| 53 |              |               |               |               |               |               |               |               |               |               |
| 54 |              |               |               |               |               |               |               |               |               |               |
| 55 |              |               |               |               |               |               |               |               |               |               |
| 56 |              |               |               |               |               |               |               |               |               |               |
| 57 |              |               |               |               |               |               |               |               |               |               |
| 58 |              |               |               |               |               |               |               |               |               |               |
| 59 |              |               |               |               |               |               |               |               |               |               |
| 60 |              |               |               |               |               |               |               |               |               |               |

|    |                |               |               |               |               |               |               |               |               |               |
|----|----------------|---------------|---------------|---------------|---------------|---------------|---------------|---------------|---------------|---------------|
| 1  |                |               |               |               |               |               |               |               |               |               |
| 2  |                |               |               |               |               |               |               |               |               |               |
| 3  |                | 251.35)       | 267.14)       |               |               |               |               |               |               |               |
| 4  |                |               |               |               |               |               |               |               |               |               |
| 5  | United         |               |               |               |               |               |               |               |               |               |
| 6  | Republic of    | 7.20 (5.89 to | 7.76 (6.36 to | 0.22 (0.10 to | 0.58 (0.40 to | 0.60 (0.41 to | 0.38 (0.19 to | 19.56 (13.24  | 18.91 (12.48  | 0.25 (0.07 to |
| 7  | Tanzania       | 8.90)         | 9.50)         | 0.35)         | 0.81)         | 0.89)         | 0.57)         | to 32.21)     | to 26.55)     | 0.43)         |
| 8  |                |               |               |               |               |               |               |               |               |               |
| 9  | United States  | 343.12        | 193.07        | -1.59 (-2.08  | 0.67 (0.60 to | 1.02 (0.80 to | 1.80 (1.52 to | 64.72 (47.50  | 49.82 (40.25  | -0.48 (-0.78  |
| 10 | of America     | (295.81 to    | (179.65 to    | to -1.09)     | 0.82)         | 1.11)         | 2.07)         | to 84.88)     | to 60.19)     | to -0.18)     |
| 11 |                | 394.51)       | 206.87)       |               |               |               |               |               |               |               |
| 12 | United States  | 31.96 (26.73  | 33.22 (27.69  | 0.23 (0.16 to | 0.81 (0.56 to | 0.45 (0.34 to | -2.32 (-2.66  | 26.35 (19.55  | 15.91 (12.54  | -2.03 (-2.27  |
| 13 | Virgin Islands | to 38.19)     | to 39.97)     | 0.31)         | 1.02)         | 0.59)         | to -1.99)     | to 32.66)     | to 20.17)     | to -1.78)     |
| 14 |                |               |               |               |               |               |               |               |               |               |
| 15 | Uruguay        | 17.66 (14.59  | 17.41 (14.35  | -0.17 (-0.21  | 0.27 (0.23 to | 0.41 (0.35 to | 1.10 (0.62 to | 9.71 (8.22 to | 12.78 (11.11  | 0.63 (0.27 to |
| 16 |                | to 21.30)     | to 21.13)     | to -0.13)     | 0.37)         | 0.47)         | 1.58)         | 12.16)        | to 14.58)     | 0.98)         |
| 17 |                |               |               |               |               |               |               |               |               |               |
| 18 | Uzbekistan     | 74.25 (62.30  | 75.79 (63.42  | -0.02 (-0.05  | 0.28 (0.20 to | 0.29 (0.23 to | -0.33 (-0.58  | 23.48 (17.64  | 21.90 (17.37  | -0.47 (-0.58  |
| 19 |                | to 88.98)     | to 90.50)     | to 0.01)      | 0.39)         | 0.39)         | to -0.09)     | to 29.48)     | to 27.16)     | to -0.36)     |
| 20 |                |               |               |               |               |               |               |               |               |               |
| 21 | Vanuatu        | 4.27 (3.44 to | 3.94 (3.23 to | -0.42 (-0.59  | 1.22 (0.69 to | 0.84 (0.52 to | -1.74 (-1.94  | 34.45 (18.68  | 25.36 (15.29  | -1.58 (-1.80  |
| 22 |                | 5.21)         | 4.77)         | to -0.24)     | 2.03)         | 1.24)         | to -1.54)     | to 54.26)     | to 38.79)     | to -1.36)     |
| 23 | Venezuela      | 29.50 (25.29  | 29.03 (24.54  | -0.01 (-0.05  | 0.25 (0.17 to | 0.15 (0.11 to | -2.32 (-2.82  | 12.00 (9.33   | 8.87 (6.84 to | -1.36 (-1.66  |
| 24 | (Bolivarian    | to 33.94)     | to 34.19)     | to 0.03)      | 0.29)         | 0.21)         | to -1.82)     | to 14.20)     | 11.26)        | to -1.05)     |
| 25 | Republic of)   |               |               |               |               |               |               |               |               |               |
| 26 |                |               |               |               |               |               |               |               |               |               |
| 27 | Viet Nam       | 9.12 (7.04 to | 18.35 (14.68  | 2.72 (2.05 to | 0.58 (0.30 to | 0.22 (0.15 to | -3.98 (-4.35  | 13.87 (8.53   | 7.60 (5.65 to | -2.48 (-2.72  |
| 28 |                | 11.43)        | to 22.55)     | 3.39)         | 0.88)         | 0.32)         | to -3.61)     | to 18.99)     | 9.80)         | to -2.23)     |
| 29 |                |               |               |               |               |               |               |               |               |               |
| 30 | Yemen          | 23.40 (18.89  | 28.03 (22.65  | 0.95 (0.76 to | 0.28 (0.15 to | 0.33 (0.22 to | 0.85 (0.73 to | 10.64 (7.11   | 12.40 (9.18   | 0.79 (0.66 to |
| 31 |                | to 29.12)     | to 34.94)     | 1.14)         | 0.52)         | 0.52)         | 0.97)         | to 15.89)     | to 16.77)     | 0.93)         |
| 32 |                |               |               |               |               |               |               |               |               |               |
| 33 | Zambia         | 6.36 (5.26 to | 8.42 (6.92 to | 0.86 (0.63 to | 0.86 (0.60 to | 0.70 (0.51 to | -0.86 (-1.04  | 27.59 (16.02  | 20.49 (14.47  | -1.05 (-1.14  |
| 34 |                | 7.78)         | 10.46)        | 1.10)         | 1.32)         | 0.94)         | to -0.69)     | to 45.42)     | to 27.66)     | to -0.96)     |
| 35 | Zimbabwe       | 8.69 (7.15 to | 8.91 (7.29 to | 0.21 (0.11 to | 0.47 (0.36 to | 0.58 (0.35 to | 0.96 (0.85 to | 14.20 (10.79  | 17.38 (10.28  | 1.22 (0.99 to |
| 36 |                | 10.74)        | 11.06)        | 0.30)         | 0.64)         | 0.86)         | 1.06)         | to 19.20)     | to 25.35)     | 1.44)         |

Abbreviations: CI=confidence interval. DALY=disability adjusted life year.  
EAPC=estimated annual percentage change. UI=uncertainty interval.

**Supplementary Table 4** Incident cases, YLLs and YLDs of inflammatory bowel disease (IBD) in 1990 and 2019 and their percentage change from 1990 to 2019

| Characteristics         | Incident cases                  |                                 |                                     | YLLs                            |                                 |                                     | YLDs                            |                                 |                                     |
|-------------------------|---------------------------------|---------------------------------|-------------------------------------|---------------------------------|---------------------------------|-------------------------------------|---------------------------------|---------------------------------|-------------------------------------|
|                         | 1990 No.<br>(95%UI)             | 2019 No.<br>(95%UI)             | Percentage<br>change (%)<br>(95%UI) | 1990 No.<br>(95%UI)             | 2019 No.<br>(95%UI)             | Percentage<br>change (%)<br>(95%UI) | 1990 No.<br>(95%UI)             | 2019 No.<br>(95%UI)             | Percentage<br>change (%)<br>(95%UI) |
| Global                  | 293572<br>(257425 to<br>336651) | 404552<br>(360521 to<br>456478) | 37.80 (33.91<br>to 41.98)           | 757137<br>(557008 to<br>914270) | 895798<br>(779706 to<br>999120) | 18.31 (-1.81<br>to 52.08)           | 491137<br>(326283 to<br>678806) | 726701<br>(487015 to<br>993466) | 47.96 (43.96<br>to 52.28)           |
| Sex                     |                                 |                                 |                                     |                                 |                                 |                                     |                                 |                                 |                                     |
| Male                    | 153074<br>(133344 to<br>174640) | 213814<br>(189759 to<br>241304) | 39.68 (36.00<br>to 43.73)           | 370299<br>(264345 to<br>462642) | 450214<br>(368766 to<br>507382) | 21.58 (-1.85<br>to 53.89)           | 230665<br>(152583 to<br>318772) | 352534<br>(235403 to<br>486701) | 52.83 (48.57<br>to 57.83)           |
| Female                  | 140498<br>(123361 to<br>161173) | 190738<br>(171154 to<br>213778) | 35.76 (31.29<br>to 39.92)           | 386839<br>(242819 to<br>477114) | 445584<br>(372799 to<br>510194) | 15.19 (-5.95<br>to 67.02)           | 260473<br>(173833 to<br>359493) | 374167<br>(251188 to<br>513406) | 43.65 (39.16<br>to 48.19)           |
| SIDI quintile           |                                 |                                 |                                     |                                 |                                 |                                     |                                 |                                 |                                     |
| High                    | 171841<br>(151878 to<br>195746) | 196451<br>(179556 to<br>217510) | 14.32 (9.64<br>to 19.56)            | 139690<br>(129255 to<br>171300) | 268406<br>(221318 to<br>288862) | 92.14 (36.87<br>to 107.98)          | 275795<br>(183466 to<br>378544) | 334924<br>(229615 to<br>452309) | 21.44 (15.85<br>to 27.66)           |
| High-middle             | 71474<br>(62545 to<br>81510)    | 94553<br>(84101 to<br>107156)   | 32.29 (29.05<br>to 36.06)           | 149876<br>(130428 to<br>171308) | 151980<br>(137423 to<br>168345) | 1.40 (-11.32<br>to 17.80)           | 138460<br>(92476 to<br>192296)  | 200814<br>(133980 to<br>276597) | 45.03 (40.58<br>to 50.41)           |
| Middle                  | 27459<br>(23259 to<br>32310)    | 59817<br>(50973 to<br>70648)    | 117.84<br>(108.98 to<br>127.40)     | 201655<br>(144191 to<br>243718) | 167470<br>(141946 to<br>187219) | -16.95<br>(-32.64 to<br>19.35)      | 46484<br>(30292 to<br>65651)    | 123619<br>(80636 to<br>174495)  | 165.94<br>(155.28 to<br>177.70)     |
| Low-middle              | 17434<br>(14532 to<br>20935)    | 36681<br>(30862 to<br>44031)    | 110.40<br>(104.05 to<br>116.72)     | 179309<br>(103608 to<br>244139) | 184730<br>(144128 to<br>223656) | 3.02 (-21.85<br>to 54.27)           | 23711<br>(15318 to<br>33814)    | 51855<br>(33811 to<br>73563)    | 118.69<br>(110.14 to<br>127.95)     |
| Low                     | 5279 (4395<br>to 6379)          | 12215<br>(10164 to<br>14793)    | 131.41<br>(126.67 to<br>136.00)     | 86179<br>(39359 to<br>140538)   | 122638<br>(86434 to<br>167342)  | 42.31 (-5.62<br>to 150.88)          | 6540 (4199<br>to 9362)          | 15228 (9694<br>to 22000)        | 132.87<br>(123.17 to<br>142.33)     |
| GBD region              |                                 |                                 |                                     |                                 |                                 |                                     |                                 |                                 |                                     |
| Andean Latin<br>America | 472 (402 to<br>550)             | 1128 (975 to<br>1314)           | 138.95<br>(128.76 to<br>150.71)     | 10085 (4860<br>to 16590)        | 4311 (3237<br>to 5564)          | -57.25<br>(-76.23 to<br>-4.50)      | 682 (439 to<br>990)             | 1631 (1060<br>to 2311)          | 139.04<br>(119.92 to<br>161.86)     |
| Australasia             | 2979 (2556<br>to 3481)          | 6446 (5755<br>to 7212)          | 116.39<br>(101.08 to<br>132.24)     | 2212 (1997<br>to 2709)          | 5448 (4212<br>to 6156)          | 146.25 (61.5<br>to 182.75)          | 3590 (2340<br>to 5079)          | 7879 (5232<br>to 10860)         | 119.48<br>(94.61 to<br>145.44)      |
| Caribbean               | 677 (580 to<br>796)             | 1312 (1121<br>to 1571)          | 93.82 (84.67<br>to 103.42)          | 6186 (3853<br>to 10389)         | 6861 (4657<br>to 9603)          | 10.92<br>(-26.38 to<br>51.60)       | 1266 (836<br>to 1782)           | 2038 (1332<br>to 2893)          | 61.05 (49.16<br>to 73.60)           |
| Central Asia            | 3514 (2995<br>to 4146)          | 6461 (5487<br>to 7637)          | 83.87 (77.84<br>to 90.36)           | 9604 (7718<br>to 11578)         | 9458 (8184<br>to 10959)         | -1.52<br>(-20.39 to<br>17.35)       | 6348 (4181<br>to 9075)          | 10778 (7154<br>to 15134)        | 69.79 (58.22<br>to 81.49)           |

|    |                |             |              |              |            |             |              |              |              |              |
|----|----------------|-------------|--------------|--------------|------------|-------------|--------------|--------------|--------------|--------------|
| 1  |                |             |              |              |            |             |              |              |              |              |
| 2  |                |             |              |              |            |             |              |              |              |              |
| 3  |                |             |              |              |            | 25.90)      |              |              |              |              |
| 4  |                |             |              |              |            |             |              |              |              |              |
| 5  |                | 20997       | 14809        | -29.47       | 19517      | 20261       |              | 42029        | 34433        | -18.07       |
| 6  | Central Europe | (18082 to   | (13443 to    | (-33.69 to   | (17440 to  | (17005 to   | 3.81 (-12.56 | (28219 to    | (23103 to    | (-23.95 to   |
| 7  |                | 24170)      | 16391)       | -24.67)      | 21350)     | 23354)      | to 21.14)    | 58172)       | 46581)       | -11.37)      |
| 8  |                |             |              |              | 11909      | 23887       | 100.58       |              |              |              |
| 9  | Central Latin  | 3968 (3402  | 6754 (5834   | 70.22 (64.07 |            |             |              | 6187 (4023   | 12291 (8076  | 98.64 (90.00 |
| 10 | America        | to 4618)    | to 7826)     | to 77.19)    | (10476 to  | (19416 to   | (62.63 to    | to 8802)     | to 17492)    | to 107.98)   |
| 11 |                |             |              |              | 13363)     | 28208)      | 141.31)      |              |              |              |
| 12 |                |             |              | 201.42       |            |             | 59.71        |              |              | 151.34       |
| 13 | Central        | 381 (318 to | 1150 (955 to |              | 9036 (4403 | 14431 (9735 |              | 455 (291 to  | 1142 (725 to |              |
| 14 | Sub-Saharan    | 469)        | 1400)        | (188.00 to   | to 17181)  | to 21338)   | (-15.47 to   | 663)         | 1644)        | (136.85 to   |
| 15 | Africa         |             |              | 216.18)      |            |             | 217.75)      |              |              | 168.27)      |
| 16 |                | 17567       | 52319        | 197.82       | 202402     | 101852      | -49.68       | 37829        | 138111       | 265.09       |
| 17 |                |             |              |              |            |             |              |              |              |              |
| 18 | East Asia      | (14627 to   | (44680 to    | (178.88 to   | (132058 to | (80904 to   | (-63.19 to   | (24646 to    | (90529 to    | (244.38 to   |
| 19 |                | 20802)      | 61455)       | 220.44)      | 259475)    | 117925)     | -16.68)      | 53906)       | 194304)      | 290.80)      |
| 20 |                | 18150       | 19500        |              | 39012      | 42550       |              | 33920        | 34573        |              |
| 21 | Eastern Europe | (15600 to   | (16838 to    | 7.44 (5.08   | (29086 to  | (36378 to   | 9.07 (-8.79  | (22663 to    | (23253 to    | 1.92 (-2.34  |
| 22 |                | 21209)      | 22671)       | to 9.90)     | 45400)     | 48906)      | to 41.38)    | 47811)       | 48708)       | to 6.15)     |
| 23 |                |             |              |              |            |             |              |              |              |              |
| 24 | Eastern        |             |              | 168.96       | 34323      | 49854       | 45.25        |              |              | 165.68       |
| 25 | Sub-Saharan    | 1092 (908   | 2938 (2449   |              | (15796 to  | (36274 to   | (-23.18 to   | 1157 (736 to | 3074 (1958   |              |
| 26 | Africa         | to 1315)    | to 3538)     | (163.69 to   | 66928)     | 71146)      | 204.58)      | 1664)        | to 4469)     | (159.54 to   |
| 27 |                |             |              | 175.74)      |            |             |              |              |              | 172.36)      |
| 28 |                | 18105       | 27084        |              | 14265      | 10285 (8672 | -27.90       | 37434        | 68316        |              |
| 29 | High-income    | (15391 to   | (23870 to    | 49.59 (40.22 | (11234 to  | to 13984)   | (-41.19 to   | (24881 to    | (45509 to    | 82.50 (67.39 |
| 30 | Asia Pacific   | 21422)      | 30621)       | to 59.35)    | 15903)     |             | 11.39)       | 52603)       | 94577)       | to 99.60)    |
| 31 |                | 107616      | 99611        | -7.44        | 48899      | 111196      | 127.40       | 160173       | 134037       | -16.32       |
| 32 | High-income    | (94147 to   | (91945 to    | (-13.45 to   | (45188 to  | (90610 to   | (58.53 to    | (106818 to   | (92136 to    | (-22.94 to   |
| 33 | North America  | 123884)     | 109000)      | -0.48)       | 60393)     | 118997)     | 147.53)      | 221989)      | 178957)      | -9.00)       |
| 34 |                |             |              |              |            |             |              |              |              |              |
| 35 | North Africa   | 8107 (7040  | 22722        | 180.29       | 21634      | 30142       | 39.33 (-4.16 | 13804 (8984  | 42612        | 208.69       |
| 36 | and Middle     | to 9204)    | (19277 to    | (162.24 to   | (13448 to  | (25222 to   | to 131.21)   | to 19350)    | (27805 to    | (184.84 to   |
| 37 | East           | 26952)      | 26952)       | 198.18)      | 31651)     | 36090)      |              |              | 59873)       | 233.72)      |
| 38 |                |             |              |              |            |             |              |              |              |              |
| 39 |                |             |              | 181.23       | 1003 (571  | 1628 (1040  | 62.31 (1.40  | 33 (20 to    | 69 (43 to    | 109.64       |
| 40 | Oceania        | 22 (18 to   | 63 (52 to    | (166.43 to   | to 1593)   | to 2510)    | to 173.45)   | 48)          | 102)         | (96.04 to    |
| 42 |                | 27)         | 77)          | 197.89)      |            |             |              |              |              | 124.81)      |
| 43 |                |             |              |              |            |             |              |              |              |              |
| 44 |                | 18439       | 39705        | 115.33       | 146986     | 170233      | 15.82        | 24461        | 51744        | 111.54       |
| 45 | South Asia     | (15169 to   | (32943 to    | (107.88 to   | (82781 to  | (122056 to  | (-12.64 to   | (15784 to    | (33609 to    | (102.18 to   |
| 46 |                | 22582)      | 48454)       | 123.07)      | 202629)    | 222489)     | 63.63)       | 35449)       | 74915)       | 121.79)      |
| 47 |                |             |              |              |            |             |              |              |              |              |
| 48 |                |             |              | 164.62       | 42561      | 38819       | -8.79        |              |              | 185.53       |
| 49 | Southeast Asia | 1882 (1527  | 4980 (4182   |              | (28111 to  | (32029 to   | (-30.14 to   | 2755 (1714   | 7867 (5022   |              |
| 50 |                | to 2270)    | to 5972)     | (151.61 to   | 54072)     | 46584)      | 30.72)       | to 4108)     | to 11568)    | (161.80 to   |
| 51 |                |             |              | 181.06)      |            |             |              |              |              | 213.61)      |
| 52 | Southern Latin | 879 (742 to | 1382 (1177   | 57.15 (49.53 | 3794 (3293 | 5362 (4801  | 41.34 (23.31 | 1454 (944    | 2377 (1528   | 63.53 (47.49 |
| 53 | America        | 1030)       | to 1620)     | to 64.67)    | to 4092)   | to 6325)    | to 66.99)    | to 2091)     | to 3449)     | to 82.12)    |
| 54 |                |             |              |              |            |             |              |              |              | 113.43       |
| 55 | Southern       | 504 (423 to | 989 (837 to  | 96.29 (90.20 | 6007 (3712 | 7933 (6389  | 32.06 (-8.55 | 608 (390 to  | 1298 (837    |              |
| 56 | Sub-Saharan    | 608)        | 1188)        | to 103.76)   | to 8927)   | to 9558)    | to 122.99)   | 884)         | to 1875)     | (105.15 to   |
| 57 | Africa         |             |              |              |            |             |              |              |              | 123.26)      |
| 58 | Tropical Latin | 7826 (6859  | 12928        | 65.19 (58.70 | 16336      | 29155       | 78.46 (62.35 | 11387 (7351  | 17842        | 56.68 (48.38 |
| 59 | America        | to 8976)    | (11334 to    | to 72.03)    | (14276 to  | (26876 to   | to 103.68)   | to 15958)    | (11730 to    | to 65.76)    |
| 60 |                |             |              |              |            |             |              |              |              |              |

|    |                |            |            |              |           |            |              |            |              |
|----|----------------|------------|------------|--------------|-----------|------------|--------------|------------|--------------|
| 1  |                |            |            |              |           |            |              |            |              |
| 2  |                |            |            |              |           |            |              |            |              |
| 3  |                | 14874)     |            | 18011)       | 33305)    |            |              | 25165)     |              |
| 4  |                |            |            |              |           |            |              |            |              |
| 5  |                | 59081      | 78645      | 33.11 (30.56 | 81826     | 160823     | 103907       | 149868     | 44.23 (39.12 |
| 6  | Western Europe | (53733 to  | (71611 to  | to 35.75)    | (75154 to | (127602 to | (69789 to    | (101976 to | to 49.03)    |
| 7  |                | 65529)     | 86709)     |              | 106409)   | 175684)    | 141113)      | 202986)    |              |
| 8  |                |            |            | 176.18       | 29540     | 51309      |              |            | 184.63       |
| 9  | Western        | 1314 (1102 | 3628 (3028 | (171.94 to   | (12580 to | (30850 to  | 73.69 (23.64 | 1657 (1057 | 4717 (3002   |
| 10 | Sub-Saharan    | to 1599)   | to 4401)   | to 180.47)   | to 46343) | to 73337)  | to 200.73)   | to 2403)   | to 6840)     |
| 11 | Africa         |            |            |              |           |            |              |            | 190.47)      |

Abbreviations: GBD=Global Burden of Disease. SDI=Socio-demographic Index. UI=uncertainty interval. YLDs=years of life lived with disability. YLLs=years of life lost.

For peer review only



**Supplementary Table 5** Age-standardised incidence, YLL and YLD rates for inflammatory bowel disease (IBD) in 1990 and 2019 and their temporal trends from 1990 to 2019

| Characteristics       | Age-standardised incidence rate |                        |                        | Age-standardized YLL rate |                        |                        | Age-standardized YLD rate |                        |                        |
|-----------------------|---------------------------------|------------------------|------------------------|---------------------------|------------------------|------------------------|---------------------------|------------------------|------------------------|
|                       | per 100,000 population          |                        |                        | per 100,000 population    |                        |                        | per 100,000 population    |                        |                        |
|                       | 1990 No.<br>(95%UI)             | 2019 No.<br>(95%UI)    | EAPC No.<br>(95%CI)    | 1990 No.<br>(95%UI)       | 2019 No.<br>(95%UI)    | EAPC No.<br>(95%CI)    | 1990 No.<br>(95%UI)       | 2019 No.<br>(95%UI)    | EAPC No.<br>(95%CI)    |
| Global                | 6.10 (5.35 to 6.96)             | 4.97 (4.43 to 5.59)    | -0.60 (-0.73 to -0.48) | 16.47 (12.78 to 19.33)    | 11.35 (9.89 to 12.70)  | -1.33 (-1.37 to -1.30) | 10.73 (7.16 to 14.82)     | 8.80 (5.90 to 12.05)   | -0.62 (-0.70 to -0.53) |
| Sex                   |                                 |                        |                        |                           |                        |                        |                           |                        |                        |
| Male                  | 6.39 (5.60 to 7.29)             | 5.30 (4.72 to 5.99)    | -0.55 (-0.68 to -0.43) | 17.08 (12.95 to 20.96)    | 11.98 (9.82 to 13.45)  | -1.29 (-1.32 to -1.27) | 10.32 (6.91 to 14.27)     | 8.66 (5.80 to 11.93)   | -0.53 (-0.60 to -0.47) |
| Female                | 5.80 (5.12 to 6.61)             | 4.64 (4.16 to 5.20)    | -0.65 (-0.78 to -0.53) | 15.95 (10.70 to 19.09)    | 10.74 (8.88 to 12.44)  | -1.39 (-1.43 to -1.35) | 11.15 (7.43 to 15.41)     | 8.96 (6.02 to 12.30)   | -0.69 (-0.79 to -0.59) |
| SDI region            |                                 |                        |                        |                           |                        |                        |                           |                        |                        |
| High                  | 18.96 (16.73 to 21.58)          | 17.61 (16.03 to 19.41) | -0.16 (-0.30 to -0.01) | 14.41 (13.34 to 17.57)    | 15.64 (13.09 to 16.73) | 0.56 (0.41 to 0.70)    | 29.54 (19.66 to 40.6)     | 27.29 (18.55 to 37.18) | -0.30 (-0.39 to -0.21) |
| High-middle           | 6.12 (5.36 to 6.99)             | 5.58 (4.97 to 6.28)    | -0.35 (-0.45 to -0.24) | 13.87 (12.06 to 15.79)    | 8.37 (7.56 to 9.33)    | -1.99 (-2.11 to -1.88) | 12.05 (8.08 to 16.72)     | 10.97 (7.26 to 15.12)  | -0.26 (-0.40 to -0.13) |
| Middle                | 1.83 (1.58 to 2.15)             | 2.27 (1.94 to 2.68)    | 1.07 (0.95 to 1.18)    | 14.68 (11.06 to 17.93)    | 7 (5.95 to 7.79)       | -2.77 (-2.85 to -2.69) | 3.43 (2.26 to 4.84)       | 4.61 (3.01 to 6.52)    | 1.22 (1.01 to 1.43)    |
| Low-middle            | 2.00 (1.70 to 2.40)             | 2.21 (1.88 to 2.65)    | 0.46 (0.35 to 0.57)    | 20.36 (13.37 to 27.43)    | 12.15 (9.66 to 14.61)  | -1.99 (-2.09 to -1.90) | 2.93 (1.93 to 4.16)       | 3.22 (2.12 to 4.56)    | 0.50 (0.38 to 0.62)    |
| Low                   | 1.46 (1.23 to 1.77)             | 1.52 (1.29 to 1.83)    | 0.37 (0.31 to 0.44)    | 20.24 (12.52 to 27.74)    | 15.18 (11.82 to 19.54) | -1.08 (-1.14 to -1.02) | 1.95 (1.26 to 2.82)       | 2.02 (1.32 to 2.88)    | 0.28 (0.19 to 0.37)    |
| GBD region            |                                 |                        |                        |                           |                        |                        |                           |                        |                        |
| Andean Latin America  | 1.63 (1.41 to 1.91)             | 1.82 (1.57 to 2.12)    | -0.05 (-0.29 to 0.20)  | 23.76 (13.24 to 36.33)    | 7.15 (5.41 to 9.17)    | -4.50 (-5.07 to -3.92) | 2.6 (1.67 to 3.8)         | 2.68 (1.74 to 3.79)    | 0.05 (0.01 to 0.08)    |
| Australasia           | 13.56 (11.64 to 15.80)          | 20.03 (17.79 to 22.57) | 0.94 (0.72 to 1.16)    | 9.98 (9.01 to 12.07)      | 11.54 (8.93 to 13.01)  | 1.11 (0.82 to 1.41)    | 16.21 (10.57 to 22.95)    | 23.45 (15.53 to 32.51) | 0.86 (0.63 to 1.09)    |
| Caribbean             | 2.11 (1.83 to 2.49)             | 2.63 (2.24 to 3.14)    | 0.49 (0.34 to 0.64)    | 19.10 (12.84 to 29.41)    | 14.19 (9.36 to 20.49)  | -1.13 (-1.33 to -0.93) | 4.28 (2.83 to 6.06)       | 4.02 (2.62 to 5.72)    | -0.06 (-0.14 to 0.01)  |
| Central Asia          | 5.99 (5.13 to 7.07)             | 6.9 (5.87 to 8.13)     | 0.50 (0.46 to 0.53)    | 14.63 (11.46 to 17.20)    | 10.56 (9.16 to 12.18)  | -1.41 (-1.54 to -1.29) | 11.48 (7.62 to 16.46)     | 11.7 (7.77 to 16.39)   | 0.08 (0.04 to 0.11)    |
| Central Europe        | 15.78 (13.61 to 18.19)          | 11.59 (10.51 to 12.81) | -1.38 (-1.76 to -0.99) | 15.87 (13.6 to 17.59)     | 11.95 (10.00 to 13.79) | -0.91 (-1.11 to -0.72) | 30.41 (20.26 to 42.11)    | 23.89 (15.95 to 32.56) | -1.16 (-1.53 to -0.79) |
| Central Latin America | 3.16 (2.74 to 3.66)             | 2.64 (2.29 to 3.06)    | -0.70 (-0.87 to -0.54) | 9.15 (8.21 to 10.10)      | 9.79 (7.96 to 11.55)   | 0.81 (0.47 to 1.16)    | 5.69 (3.74 to 8.02)       | 4.89 (3.22 to 6.96)    | -0.50 (-0.58 to -0.42) |
| Central Sub-Saharan   | 1.04 (0.88 to 1.26)             | 1.26 (1.06 to 1.52)    | 0.64 (0.59 to 0.70)    | 20.92 (13.38 to 31.16)    | 16.45 (11.73 to 22.99) | -0.84 (-0.92 to -0.75) | 1.33 (0.87 to 1.94)       | 1.32 (0.85 to 1.91)    | -0.16 (-0.35 to 0.04)  |

|    |                |            |              |              |              |               |              |              |              |               |
|----|----------------|------------|--------------|--------------|--------------|---------------|--------------|--------------|--------------|---------------|
| 1  |                |            |              |              |              |               |              |              |              |               |
| 2  |                |            |              |              |              |               |              |              |              |               |
| 3  | Africa         |            |              |              |              |               |              |              |              |               |
| 4  |                |            |              |              |              |               |              |              |              |               |
| 5  | East Asia      | 1.45 (1.22 | 2.95 (2.55   | 2.54 (2.39   | 20.78 (14.55 | 6.12 (4.90    | -4.52 (-4.79 | 3.45 (2.26   | 6.95 (4.57   | 2.74 (2.37 to |
| 6  |                | to 1.71)   | to 3.43)     | to 2.69)     | to 26.09)    | to 7.03)      | to -4.24)    | to 4.87)     | to 9.69)     | 3.12)         |
| 7  |                | 7.10 (6.12 | 7.34 (6.34   | 0.07 (-0.02  | 14.85 (11.23 | 14.46 (12.37  | -0.56 (-0.82 | 12.83 (8.55  | 12.21 (8.15  | 0.05 (-0.07   |
| 8  | Eastern Europe | to 8.29)   | to 8.55)     | to 0.17)     | to 17.29)    | to 16.65)     | to -0.30)    | to 18.05)    | to 17.24)    | to 0.17)      |
| 9  |                |            |              |              |              |               |              |              |              |               |
| 10 | Eastern        | 0.89 (0.76 | 1.04 (0.88   | 0.55 (0.48   | 21.56 (15.07 | 18.27 (13.48  | -0.51 (-0.59 | 1.02 (0.66   | 1.17 (0.76   | 0.44 (0.40 to |
| 11 | Sub-Saharan    | to 1.07)   | to 1.25)     | to 0.61)     | to 32.54)    | to 24.41)     | to -0.43)    | to 1.46)     | to 1.67)     | 0.48)         |
| 12 | Africa         |            |              |              |              |               |              |              |              |               |
| 13 |                |            |              |              |              |               |              |              |              |               |
| 14 | High-income    | 9.25 (7.88 | 14.93 (13.14 | 1.10 (0.84   | 7.85 (6.04   | 2.74 (2.35    | -4.07 (-4.38 | 18.58 (12.28 | 31.81 (21.06 | 1.11 (0.73 to |
| 15 | Asia Pacific   | to 10.91)  | to 16.93)    | to 1.37)     | to 8.80)     | to 3.86)      | to -3.77)    | to 26.01)    | to 44.06)    | 1.49)         |
| 16 |                | 34.88      |              |              |              |               |              |              |              |               |
| 17 | High-income    | (30.59 to  | 24.51 (22.65 | -0.82 (-1.20 | 14.94 (13.84 | 20.18 (16.54  | 1.26 (1.03   | 50.69 (33.71 | 31.1 (21.34  | -1.28 (-1.69  |
| 18 | North America  | 40.02)     | to 26.77)    | to -0.45)    | to 18.40)    | to 21.51)     | to 1.50)     | to 70.19)    | to 41.87)    | to -0.86)     |
| 19 |                |            |              |              |              |               |              |              |              |               |
| 20 | North Africa   |            |              |              |              |               |              |              |              |               |
| 21 | and Middle     | 2.95 (2.59 | 3.74 (3.19   | 0.62 (0.53   | 8.82 (5.96   | 6.06 (5.08    | -1.32 (-1.36 | 5.55 (3.65   | 7.21 (4.74   | 0.88 (0.76 to |
| 22 | East           | to 3.38)   | to 4.45)     | to 0.72)     | to 12.45)    | to 7.15)      | to -1.29)    | to 7.72)     | to 10.1)     | 1.00)         |
| 23 |                |            |              |              |              |               |              |              |              |               |
| 24 |                | 0.44 (0.36 | 0.56 (0.47   | 0.87 (0.76   | 19.89 (12.45 | 14.30 (9.82   | -1.32 (-1.41 | 0.71 (0.45   | 0.63 (0.40   | -0.53 (-0.72  |
| 25 | Oceania        | to 0.52)   | to 0.67)     | to 0.98)     | to 28.10)    | to 20.46)     | to -1.23)    | to 1.03)     | to 0.93)     | to -0.34)     |
| 26 |                |            |              |              |              |               |              |              |              |               |
| 27 | South Asia     | 2.15 (1.79 | 2.32 (1.93   | 0.47 (0.31   | 18.45 (11.93 | 10.91 (7.96   | -2.10 (-2.23 | 3.02 (1.97   | 3.08 (2.01   | 0.25 (0.09 to |
| 28 |                | to 2.64)   | to 2.84)     | to 0.63)     | to 26.19)    | to 14.27)     | to -1.97)    | to 4.38)     | to 4.49)     | 0.40)         |
| 29 |                |            |              |              |              |               |              |              |              |               |
| 30 | Southeast Asia | 0.46 (0.38 | 0.70 (0.59   | 1.45 (1.27   | 12.43 (7.76  | 6.35 (5.08    | -2.69 (-2.85 | 0.73 (0.46   | 1.09 (0.7 to | 1.52 (1.22 to |
| 31 |                | to 0.56)   | to 0.84)     | to 1.63)     | to 15.13)    | to 7.61)      | to -2.53)    | to 1.09)     | 1.60)        | 1.83)         |
| 32 | Southern Latin | 1.82 (1.54 | 1.92 (1.63   | 0.24 (0.15   | 8.05 (7.00   | 6.85 (6.15    | -0.71 (-0.86 | 3.05 (1.98   | 3.21 (2.06   | 0.23 (0.04 to |
| 33 | America        | to 2.13)   | to 2.26)     | to 0.34)     | to 8.69)     | to 8.08)      | to -0.56)    | to 4.38)     | to 4.68)     | 0.42)         |
| 34 |                |            |              |              |              |               |              |              |              |               |
| 35 | Southern       | 1.30 (1.10 | 1.37 (1.17   | 0.13 (0.06   | 13.43 (9.33  | 11.79 (9.6 to | -0.20 (-0.55 | 1.67 (1.08   | 1.87 (1.22   | 0.48 (0.41 to |
| 36 | Sub-Saharan    | to 1.56)   | to 1.65)     | to 0.20)     | to 17.23)    | 13.95)        | to 0.15)     | to 2.41)     | to 2.70)     | 0.55)         |
| 37 | Africa         |            |              |              |              |               |              |              |              |               |
| 38 | Tropical Latin | 6.09 (5.40 | 5.25 (4.60   | -0.55 (-0.59 | 13.65 (11.97 | 12.09 (11.13  | -0.18 (-0.34 | 9.72 (6.37   | 7.17 (4.71   | -0.83 (-1.04  |
| 39 | America        | to 6.93)   | to 6.03)     | to -0.51)    | to 14.87)    | to 13.83)     | to -0.02)    | to 13.54)    | to 10.10)    | to -0.63)     |
| 40 |                | 13.98      |              |              |              |               |              |              |              |               |
| 41 |                | (12.67 to  | 16.94 (15.33 | 0.60 (0.55   | 16.07 (14.83 | 18.85 (15.12  | 0.92 (0.72   | 23.17 (15.52 | 27.93 (19.01 | 0.38 (0.26 to |
| 42 | Western Europe | 15.48)     | to 18.73)    | to 0.65)     | to 20.58)    | to 20.42)     | to 1.11)     | to 31.53)    | to 38.12)    | 0.49)         |
| 43 |                |            |              |              |              |               |              |              |              |               |
| 44 |                |            |              |              |              |               |              |              |              |               |
| 45 | Western        | 1.01 (0.86 | 1.17 (1.00   | 0.36 (0.22   | 18.33 (10.38 | 15.14 (10.25  | -0.69 (-0.80 | 1.37 (0.89   | 1.63 (1.06   | 0.78 (0.66 to |
| 46 | Sub-Saharan    | to 1.23)   | to 1.41)     | to 0.50)     | to 29.12)    | to 20.82)     | to -0.58)    | to 1.98)     | to 2.34)     | 0.90)         |
| 47 | Africa         |            |              |              |              |               |              |              |              |               |
| 48 |                |            |              |              |              |               |              |              |              |               |

Abbreviations: CI=confidence interval. EAPC=estimated annual percentage change. GBD=Global Burden of Disease. SDI=Socio-demographic Index. UI=uncertainty interval. YLD=years of life lived with disability. YLL=years of life lost.

## STROBE Statement—checklist of items that should be included in reports of observational studies

|                              | Item No | Recommendation                                                                                                                                                                                                                                                                                                                                                                                                                                                         | Page No |
|------------------------------|---------|------------------------------------------------------------------------------------------------------------------------------------------------------------------------------------------------------------------------------------------------------------------------------------------------------------------------------------------------------------------------------------------------------------------------------------------------------------------------|---------|
| <b>Title and abstract</b>    | 1       | (a) Indicate the study's design with a commonly used term in the title or the abstract                                                                                                                                                                                                                                                                                                                                                                                 | 1       |
|                              |         | (b) Provide in the abstract an informative and balanced summary of what was done and what was found                                                                                                                                                                                                                                                                                                                                                                    | 2       |
| <b>Introduction</b>          |         |                                                                                                                                                                                                                                                                                                                                                                                                                                                                        |         |
| Background/rationale         | 2       | Explain the scientific background and rationale for the investigation being reported                                                                                                                                                                                                                                                                                                                                                                                   | 4       |
| Objectives                   | 3       | State specific objectives, including any prespecified hypotheses                                                                                                                                                                                                                                                                                                                                                                                                       | 4       |
| <b>Methods</b>               |         |                                                                                                                                                                                                                                                                                                                                                                                                                                                                        |         |
| Study design                 | 4       | Present key elements of study design early in the paper                                                                                                                                                                                                                                                                                                                                                                                                                | 5       |
| Setting                      | 5       | Describe the setting, locations, and relevant dates, including periods of recruitment, exposure, follow-up, and data collection                                                                                                                                                                                                                                                                                                                                        | 5       |
| Participants                 | 6       | (a) <i>Cohort study</i> —Give the eligibility criteria, and the sources and methods of selection of participants. Describe methods of follow-up<br><i>Case-control study</i> —Give the eligibility criteria, and the sources and methods of case ascertainment and control selection. Give the rationale for the choice of cases and controls<br><i>Cross-sectional study</i> —Give the eligibility criteria, and the sources and methods of selection of participants | 5       |
|                              |         | (b) <i>Cohort study</i> —For matched studies, give matching criteria and number of exposed and unexposed<br><i>Case-control study</i> —For matched studies, give matching criteria and the number of controls per case                                                                                                                                                                                                                                                 |         |
| Variables                    | 7       | Clearly define all outcomes, exposures, predictors, potential confounders, and effect modifiers. Give diagnostic criteria, if applicable                                                                                                                                                                                                                                                                                                                               | 5-6     |
| Data sources/<br>measurement | 8*      | For each variable of interest, give sources of data and details of methods of assessment (measurement). Describe comparability of assessment methods if there is more than one group                                                                                                                                                                                                                                                                                   | 5-6     |
| Bias                         | 9       | Describe any efforts to address potential sources of bias                                                                                                                                                                                                                                                                                                                                                                                                              | 6       |
| Study size                   | 10      | Explain how the study size was arrived at                                                                                                                                                                                                                                                                                                                                                                                                                              | 6       |
| Quantitative variables       | 11      | Explain how quantitative variables were handled in the analyses. If applicable, describe which groupings were chosen and why                                                                                                                                                                                                                                                                                                                                           | 5-6     |
| Statistical methods          | 12      | (a) Describe all statistical methods, including those used to control for confounding                                                                                                                                                                                                                                                                                                                                                                                  | 6       |
|                              |         | (b) Describe any methods used to examine subgroups and interactions                                                                                                                                                                                                                                                                                                                                                                                                    | 6       |
|                              |         | (c) Explain how missing data were addressed                                                                                                                                                                                                                                                                                                                                                                                                                            | 6       |
|                              |         | (d) <i>Cohort study</i> —If applicable, explain how loss to follow-up was addressed<br><i>Case-control study</i> —If applicable, explain how matching of cases and controls was addressed<br><i>Cross-sectional study</i> —If applicable, describe analytical methods taking account of sampling strategy                                                                                                                                                              |         |
|                              |         | (e) Describe any sensitivity analyses                                                                                                                                                                                                                                                                                                                                                                                                                                  | 6       |

Continued on next page

1  
2  
3  
4  
5  
6  
7  
8  
9  
10  
11  
12  
13  
14  
15  
16  
17  
18  
19  
20  
21  
22  
23  
24  
25  
26  
27  
28  
29  
30  
31  
32  
33  
34  
35  
36  
37  
38  
39  
40  
41  
42  
43  
44  
45  
46  
47  
48  
49  
50  
51  
52  
53  
54  
55  
56  
57  
58  
59  
60

| <b>Results</b>           |     |                                                                                                                                                                                                              |       |
|--------------------------|-----|--------------------------------------------------------------------------------------------------------------------------------------------------------------------------------------------------------------|-------|
| Participants             | 13* | (a) Report numbers of individuals at each stage of study—eg numbers potentially eligible, examined for eligibility, confirmed eligible, included in the study, completing follow-up, and analysed            | 6-10  |
|                          |     | (b) Give reasons for non-participation at each stage                                                                                                                                                         | 6-10  |
|                          |     | (c) Consider use of a flow diagram                                                                                                                                                                           | 6-10  |
| Descriptive data         | 14* | (a) Give characteristics of study participants (eg demographic, clinical, social) and information on exposures and potential confounders                                                                     | 6-10  |
|                          |     | (b) Indicate number of participants with missing data for each variable of interest                                                                                                                          | 6-10  |
|                          |     | (c) <i>Cohort study</i> —Summarise follow-up time (eg, average and total amount)                                                                                                                             | 6-10  |
| Outcome data             | 15* | <i>Cohort study</i> —Report numbers of outcome events or summary measures over time                                                                                                                          | 6-10  |
|                          |     | <i>Case-control study</i> —Report numbers in each exposure category, or summary measures of exposure                                                                                                         | 6-10  |
|                          |     | <i>Cross-sectional study</i> —Report numbers of outcome events or summary measures                                                                                                                           | 6-10  |
| Main results             | 16  | (a) Give unadjusted estimates and, if applicable, confounder-adjusted estimates and their precision (eg, 95% confidence interval). Make clear which confounders were adjusted for and why they were included | 6-10  |
|                          |     | (b) Report category boundaries when continuous variables were categorized                                                                                                                                    | 6-10  |
|                          |     | (c) If relevant, consider translating estimates of relative risk into absolute risk for a meaningful time period                                                                                             | 6-10  |
| Other analyses           | 17  | Report other analyses done—eg analyses of subgroups and interactions, and sensitivity analyses                                                                                                               | 6-10  |
| <b>Discussion</b>        |     |                                                                                                                                                                                                              |       |
| Key results              | 18  | Summarise key results with reference to study objectives                                                                                                                                                     | 10-11 |
| Limitations              | 19  | Discuss limitations of the study, taking into account sources of potential bias or imprecision. Discuss both direction and magnitude of any potential bias                                                   | 12    |
| Interpretation           | 20  | Give a cautious overall interpretation of results considering objectives, limitations, multiplicity of analyses, results from similar studies, and other relevant evidence                                   | 10-13 |
| Generalisability         | 21  | Discuss the generalisability (external validity) of the study results                                                                                                                                        | 13    |
| <b>Other information</b> |     |                                                                                                                                                                                                              |       |
| Funding                  | 22  | Give the source of funding and the role of the funders for the present study and, if applicable, for the original study on which the present article is based                                                | 14    |

\*Give information separately for cases and controls in case-control studies and, if applicable, for exposed and unexposed groups in cohort and cross-sectional studies.

**Note:** An Explanation and Elaboration article discusses each checklist item and gives methodological background and published examples of transparent reporting. The STROBE checklist is best used in conjunction with this article (freely available on the Web sites of PLoS Medicine at <http://www.plosmedicine.org/>, Annals of Internal Medicine at <http://www.annals.org/>, and Epidemiology at <http://www.epidem.com/>). Information on the STROBE Initiative is available at [www.strobe-statement.org](http://www.strobe-statement.org).

# BMJ Open

## The global, regional and national burden of inflammatory bowel disease in 204 countries and territories from 1990 to 2019: A systematic analysis based on the Global Burden of Disease Study 2019

|                                 |                                                                                                                                                                                                                                                                                                                                |
|---------------------------------|--------------------------------------------------------------------------------------------------------------------------------------------------------------------------------------------------------------------------------------------------------------------------------------------------------------------------------|
| Journal:                        | <i>BMJ Open</i>                                                                                                                                                                                                                                                                                                                |
| Manuscript ID                   | bmjopen-2022-065186.R2                                                                                                                                                                                                                                                                                                         |
| Article Type:                   | Original research                                                                                                                                                                                                                                                                                                              |
| Date Submitted by the Author:   | 07-Feb-2023                                                                                                                                                                                                                                                                                                                    |
| Complete List of Authors:       | Wang, Rui; Central South University Third Xiangya Hospital; Central South University Third Xiangya Hospital<br>Li, Zhaoqi; Central South University Third Xiangya Hospital<br>Liu, Shaojun; Central South University Third Xiangya Hospital<br>Zhang, Decai; Central South University Third Xiangya Hospital, Gastroenterology |
| <b>Primary Subject Heading</b>: | Epidemiology                                                                                                                                                                                                                                                                                                                   |
| Secondary Subject Heading:      | Gastroenterology and hepatology                                                                                                                                                                                                                                                                                                |
| Keywords:                       | Inflammatory bowel disease < GASTROENTEROLOGY, EPIDEMIOLOGY, Gastroenterology < INTERNAL MEDICINE                                                                                                                                                                                                                              |
|                                 |                                                                                                                                                                                                                                                                                                                                |

SCHOLARONE™  
Manuscripts



I, the Submitting Author has the right to grant and does grant on behalf of all authors of the Work (as defined in the below author licence), an exclusive licence and/or a non-exclusive licence for contributions from authors who are: i) UK Crown employees; ii) where BMJ has agreed a CC-BY licence shall apply, and/or iii) in accordance with the terms applicable for US Federal Government officers or employees acting as part of their official duties; on a worldwide, perpetual, irrevocable, royalty-free basis to BMJ Publishing Group Ltd ("BMJ") its licensees and where the relevant Journal is co-owned by BMJ to the co-owners of the Journal, to publish the Work in this journal and any other BMJ products and to exploit all rights, as set out in our [licence](#).

The Submitting Author accepts and understands that any supply made under these terms is made by BMJ to the Submitting Author unless you are acting as an employee on behalf of your employer or a postgraduate student of an affiliated institution which is paying any applicable article publishing charge ("APC") for Open Access articles. Where the Submitting Author wishes to make the Work available on an Open Access basis (and intends to pay the relevant APC), the terms of reuse of such Open Access shall be governed by a Creative Commons licence – details of these licences and which [Creative Commons](#) licence will apply to this Work are set out in our licence referred to above.

Other than as permitted in any relevant BMJ Author's Self Archiving Policies, I confirm this Work has not been accepted for publication elsewhere, is not being considered for publication elsewhere and does not duplicate material already published. I confirm all authors consent to publication of this Work and authorise the granting of this licence.

1  
2  
3  
4 **The global, regional and national burden of inflammatory bowel disease in 204**  
5 **countries and territories from 1990 to 2019: A systematic analysis based on the**  
6 **Global Burden of Disease Study 2019**  
7  
8  
9

10  
11 Rui Wang<sup>1,2</sup>, Zhaoqi Li<sup>1,2</sup>, Shaojun Liu<sup>1,2</sup>, Decai Zhang<sup>1,2\*</sup>  
12  
13

14  
15 1 Department of Gastroenterology, The Third Xiangya Hospital of Central South  
16 University, Changsha 410013, Hunan Province, China.  
17

18  
19 2 Hunan Key Laboratory of Nonresolving Inflammation and Cancer, Changsha  
20 410013, Hunan Province, China  
21  
22

23  
24  
25 \*Correspondence: Decai Zhang, Department of Gastroenterology, The Third Xiangya  
26 Hospital of Central South University, Changsha 410013, Hunan Province, China.  
27

28  
29 Email: decaizhang@csu.edu.cn  
30  
31

32  
33 Running title: Global burden of inflammatory bowel disease  
34  
35  
36  
37  
38  
39  
40  
41  
42  
43  
44  
45  
46  
47  
48  
49  
50  
51  
52  
53  
54  
55  
56  
57  
58  
59  
60



## Abstract

**Objectives** We aimed to provide the most updated estimates on the global burden of inflammatory bowel disease (IBD) to improve management strategies.

**Design** We extracted data from the Global Burden of Disease (GBD) 2019 database to evaluate IBD burden with different measures in 204 countries and territories from 1990 to 2019.

**Setting** Studies from the GBD 2019 database generated by population-representative data sources identified through a literature review and research collaborations were included.

**Participants** Patients with an IBD diagnosis.

**Outcomes** Total numbers, age-standardised rates of prevalence, mortality and disability-adjusted life years (DALYs), and their estimated annual percentage changes (EAPCs) were the main outcomes.

**Results** In 2019, there were approximately 4.9 million cases of IBD worldwide, with China and the United States having the highest number of cases [911405 and 762890 (66.9 and 245.3 cases per 100 000 people, respectively)]. Between 1990 and 2019, the global age-standardised rates of prevalence, deaths, and DALYs decreased (EAPCs = -0.66, -0.69, and -1.04, respectively). However, the age-standardised prevalence rate increased in 13 out of 21 GBD regions. A total of 147 out of 204 countries or territories experienced an increase in the age-standardised prevalence rate. From 1990 to 2019, IBD prevalent cases, deaths and DALYs were higher among females than among males. A higher sociodemographic index (SDI) was associated with higher age-standardised prevalence rates.

**Conclusions** IBD will continue to be a major public health burden due to increasing numbers of prevalent cases, deaths, and DALYs. The epidemiological trends and disease burden of IBD have changed dramatically at the regional and national levels, so understanding these changes would be beneficial for policy-makers to tackle IBD.

**Keywords:** Inflammatory bowel disease; Global burden of disease; Prevalence; Disability-adjusted life years; Estimated annual percentage change.

### **Strengths and limitations of this study**

This is the most updated estimate on IBD epidemiology worldwide and included 204 countries, some of which have not been assessed before.

GBD 2019 incorporated more studies, adjusted diagnostic criteria, and further improved data reliability, hence presenting data more representative of individuals.

One of the limitations was heterogeneity in population and location between the studies included.

Another limitation is that the variability in study design and data collection methods also affected the precision of the estimates, which is only partially compensated for in our analysis model.

The third limitation is that the results for some geographical regions were severely limited by the paucity of data (not just variability in study design but lack of studies) and should be treated with caution.

## Introduction

Inflammatory bowel diseases (IBDs), including Crohn's disease and ulcerative colitis, are debilitating and chronic inflammatory disorders of the gastrointestinal tract that have no cure.<sup>1</sup> IBD is characterised by a relapsing-remitting course and a heterogeneous clinical presentation that includes episodes of abdominal pain, chronic diarrhoea, rectal bleeding, and weight loss, which are often associated with systemic symptoms such as fatigue and occasionally fever.<sup>2</sup> Because IBD can cause significant morbidity and lead to complications such as strictures, fistulas, infections, and cancer, this disorder leads to substantial health care costs and places great stress on health care systems.<sup>3,4</sup> Although the cause of IBD remains unknown, the pathogenesis of IBD is suggested to be associated with genetic susceptibility of the host, intestinal microbiota, other environmental factors (e.g., diet, smoking, and physiological stress), and immunological abnormalities.<sup>5</sup>

Traditionally, IBD has been regarded as a disease of the Western world; however, studies over the last two decades have shown a rapidly increasing incidence in newly industrialised countries in the Middle East, Asia, and South America.<sup>6</sup> Conversely, IBD incidence rates appeared to plateau in the Western world in the 21st century.<sup>7</sup> These substantial changes highlight the need for a comparable, consistent and systematic analysis of disease burden and trends concerning IBD in different regions and countries, which can be used to provide convincing evidence for rational allocation of resources and health care planning in reducing the global burden of IBD.

The Global Burden of Disease (GBD) Study 2019, a systematic worldwide epidemiological study, assessed the prevalence, morbidity, mortality, and disability of 369 diseases by location, sex, age and year,<sup>8</sup> which provides a unique opportunity to understand the state of IBD. The purpose of this study was to use data from the GBD 2019 study to determine the global, regional and national burden of IBD across 204 countries and territories from 1990 to 2019 by age, sex and sociodemographic index (SDI). Our study provides updated estimates on global IBD epidemiology and provides data on some regions not assessed previously or data-scarce locations, of which estimates mainly rely on predictive covariates or global trends with

1  
2  
3  
4 consideration of SDI level and data from a single country.  
5  
6

## 7 8 **Methods**

9  
10 The general methodology of GBD 2019 has been reported in detail in previous  
11 publications.<sup>8-11</sup> In brief, the GBD Study collected data from censuses, household  
12 surveys, civil registration and vital statistics, disease registries, health service use,  
13 satellite imaging, disease notifications, and other sources.<sup>9</sup> A Bayesian  
14 meta-regression modelling tool, DisMod-MR 2.1, was used to model and derive  
15 estimates of the burden under several conditions in 204 countries and territories from  
16 1990 to 2019.<sup>9</sup> The model included all of the above available information for each  
17 disease and applied a correcting process for known bias to derive country-specific  
18 estimates of prevalence and burden of diseases, which have been described in  
19 previous studies.<sup>8</sup> Uncertainty intervals (UIs) were generated for every metric using  
20 the 25th and 75th ordered 1000 draw values of the posterior distribution.<sup>9</sup>  
21  
22  
23  
24  
25  
26  
27  
28  
29  
30

31 We extracted yearly crude and age-standardised estimates of different measures of  
32 the burden of IBD from the GBD database from 1990 to 2019 and the respective 95%  
33 UIs via the Global Health Data Exchange (GHDx) query tool (<http://ghdx.healthdata.org/gbd-results-tool>). For the GBD 2019 assessment, IBD was defined  
34 according to the 10<sup>th</sup> revision of the International Classification of Diseases (ICD-10  
35 codes: K50-K51.319, K51.5-K52, K52.8-K52.9). The variables obtained from the  
36 database included prevalent cases, number of deaths, number of disability-adjusted  
37 life years (DALYs), number of years of life lost (YLL), number of years lived with  
38 disability (YLD), and their corresponding age-standardised rates (ASRs) at the global,  
39 regional, and national levels. The prevalence rate (per 100 000 people) was defined as  
40 aggregated cases (including new cases and previously diagnosed cases) divided by the  
41 population size; the mortality rate (per 100 000 people) was defined as the number of  
42 annual deaths divided by the total population size, and DALYs were calculated as the  
43 sum of YLL and YLD. These data were stratified by age (1-4, 5-9, every 5-year age  
44 group up to 95 years, and 95 years and older), calendar year (1990-2019), region, and  
45 country (or territory). Geographically, the world was classified into 21 regions.  
46  
47  
48  
49  
50  
51  
52  
53  
54  
55  
56  
57  
58  
59  
60

Moreover, 204 countries and territories were divided into five categories according to the SDI. The SDI was constructed based on the geometric mean of three indicators: the total fertility rate, income per capita, and average years of schooling among people aged 15 years or older, ranging from zero to one.<sup>12</sup> The larger the SDI, the more developed the country.<sup>13</sup>

Estimated average percentage changes (EAPCs) were used to evaluate trends in the age-standardised rates of prevalence, deaths, and DALYs over a specific period. The natural logarithm of the age-standardised rate was assumed to be linear along with time; that is,  $y = \alpha + \beta x + \varepsilon$ , where  $y = \ln(\text{rate})$ ,  $x = \text{calendar year}$ , and  $\varepsilon = \text{error term}$ . Based on this formula,  $\beta$  represents the positive or negative age-standardised rate trends. The EAPC was calculated as  $100 \times (\exp(\beta) - 1)$ , and its 95% confidence interval (CI) could also be calculated from this model.<sup>14</sup> The age-standardised indicator was recognised to be experiencing an upward trend if the 95% CI of the corresponding EAPC estimation was  $> 0$ , to be experiencing a downward trend if the 95% CI was  $< 0$  and to be stable if the 95% CI included 0. All statistical analyses and visualisations were conducted using the R statistical software programme (version 4.1.0). A  $P$  value  $< 0.05$  was considered statistically significant.

Because this study was based on a publicly available dataset, it was exempted from the informed consent requirement by the ethics committee of the XXX. This study followed the guidelines for a cross-sectional study described in the Guidelines for Accurate and Transparent Health Estimates Reporting (GATHER).<sup>15</sup>

### **Patient and public involvement**

Patients and/or the public were not involved in the study design, data interpretation, manuscript drafting, or dissemination plans of this research.

## **Results**

### **Prevalence of IBD**

Globally, IBD accounted for 3.32 million estimated cases (95% UI 2.90 to 3.79) in 1990 and 4.90 million cases (4.35 to 5.50) in 2019, corresponding to an increase of 47.45% between 1990 and 2019 (Supplementary Table 1 and Figure 1A). The global

1  
2  
3  
4 age-standardised prevalence rate of IBD decreased from 73.23 per 100 000 people  
5 (63.86 to 83.63) in 1990 to 59.25 per 100 000 people (52.78 to 66.47) in 2019, with  
6 an EAPC of -0.66 (95% CI -0.75 to -0.57) (Table 1; Figure 1B, 1C; and Figure 2A).  
7  
8 Although graphical representation suggested homogeneity of data quality across the  
9 globe, this was not the case, and estimates were based on extremely limited data and  
10 should be treated with caution in some regions.  
11  
12  
13  
14

15 At the regional level in 2019, the largest number of prevalent cases was observed in  
16 Western Europe [1.03 million (95% UI 0.93 to 1.13)] (Supplementary Table 1), and  
17 the highest age-standardised prevalence rate was observed in the high-income Asia  
18 Pacific region [210.54 per 100 000 people (183.69 to 239.68)] (Figure 3A). From  
19 1990 to 2019, an increase in total prevalent cases was seen across most GBD regions,  
20 as shown in Figure 4A. However, the age-standardised prevalence rate increased in 13  
21 GBD regions and decreased in 5 regions, with the highest upward trend in East Asia  
22 [EAPC = 2.79 (95% CI 2.41 to 3.18)] and the largest decrease in high-income North  
23 America [EAPC = -1.32 (-1.75 to -0.89)] (Figure 2B).  
24  
25  
26  
27  
28  
29  
30  
31  
32

33 At the national and territorial levels in 2019, China and the United States of  
34 America had the highest number of prevalent cases [911405 (95% UI 776347 to  
35 1069533) and 762890 (712357 to 813654), respectively] (Supplementary Table 2 and  
36 Figure 1A). In 2019, the highest age-standardised prevalence rates of IBD were  
37 observed in Norway [498.95 (429.41 to 570.55)] (Supplementary Table 3 and Figure  
38 1B). Between 1990 and 2019, age-standardised prevalence rates showed an upward  
39 trend in 147 countries or territories, with the greatest increase in Taiwan (Province of  
40 China) [EAPC = 4.29 (95% CI 3.71 to 4.86)] (Figure 1C).  
41  
42  
43  
44  
45  
46  
47  
48

49 Overall, the global number of prevalent cases was higher among females than  
50 among males in 2019 (Supplementary Table 1). The age-standardised prevalence rate  
51 was similar between males and females in 2019 (Table 1). The highest peak IBD  
52 prevalence and age-specific prevalence rates occurred at ages 50-54 years and 60-64  
53 years, respectively, among females and males in 2019 (Figure 5A). From 1990 to  
54 2019, the number of prevalent cases continued to increase for both sexes and was  
55 higher among females than among males in all years. The age-standardised  
56  
57  
58  
59  
60

1  
2  
3  
4 prevalence rate decreased for both sexes during the same period (Supplementary  
5  
6 Figure 1).

### 7 **Deaths related to IBD**

8  
9 In 2019, there were 40998 deaths (95% UI 34933 to 44661) due to IBD worldwide,  
10  
11 which increased by 68.75% (47.12 to 94.62) from 24295 (20258 to 28376) in 1990  
12  
13 (Supplementary Table 1 and Supplementary Figure 2). The global age-standardised  
14  
15 death rate was 0.54 per 100 000 people (0.46 to 0.59) in 2019, which decreased from  
16  
17 0.67 per 100 000 people (0.57 to 0.78) in 1990, with an EAPC of -0.69 (95% CI -0.81  
18  
19 to -0.57) (Table 1, Figure 2C, and Supplementary Figures 3-4).

20  
21 At the regional level, Western Europe was also the region with the largest number  
22  
23 of deaths [11981 (95% UI 9244 to 13315)] and the highest age-standardised death rate  
24  
25 [1.11 per 100 000 people (0.87 to 1.23)] in 2019 (Supplementary Table 1 and Figure  
26  
27 3B). From 1990 to 2019, most GBD regions experienced an increase in total deaths  
28  
29 from IBD (Figure 4B). However, the age-standardised death rate declined in more  
30  
31 than 60% of GBD regions, such as the high-income Asia Pacific region [EAPC =  
32  
33 -4.29 (95% CI -4.64 to -3.93)], East Asia [EAPC = -3.98 (-4.33 to -3.63)], and  
34  
35 Andean Latin America [EAPC = -2.74 (-3.16 to -2.32)] (Figure 2D).

36  
37 At the national and territorial levels in 2019, China and the United States of  
38  
39 America also had the highest number of deaths [4676 (95% UI 3774 to 5461) and  
40  
41 5910 (4622 to 6464), respectively] (Supplementary Table 2 and Supplementary  
42  
43 Figure 2). The Netherlands had the highest age-standardised death rate in 2019 [2.08  
44  
45 per 100 000 people (1.58 to 2.40)] (Supplementary Table 3 and Supplementary Figure  
46  
47 3). Between 1990 and 2019, more than 60% of countries or territories experienced a  
48  
49 decrease in the age-standardised death rate of IBD, and the largest decrease was noted  
50  
51 in the Republic of Korea [EAPC = -7.96 (-8.67 to -7.25)] (Supplementary Figure 4).

52  
53 Globally, the number of deaths was higher among females than among males in  
54  
55 2019 (Supplementary Table 1). The age-standardised death rate was 0.56 per 100 000  
56  
57 people (95% UI 0.45 to 0.62) among males and 0.52 per 100 000 people (0.43 to  
58  
59 0.58) among females (Table 1). In 2019, the highest number of deaths was observed  
60  
among males aged 80-84 years and females aged 85-89 years, and the highest



1  
2  
3  
4 age-specific death rate was observed in the oldest age group ( $\geq 95$  years) for both  
5 sexes (Figure 5B). Between 1990 and 2019, deaths related to IBD also continued to  
6 increase for both sexes and were higher among females than among males in all years.  
7  
8 However, the age-standardised death rate decreased for both sexes from 1990 to 2019  
9  
10 (Supplementary Figure 5).  
11

### 12 **DALYs of IBD**

13  
14 Globally, 1.62 million (95% UI 1.36 to 1.92) DALYs, 0.73 million (0.49 to 0.99)  
15 YLD, and 0.90 million (0.78 to 1.00) YLL were due to IBD in 2019, which increased  
16 from 1990 by 29.98%, 47.96%, and 18.31%, respectively (Supplementary Table 1,  
17 Supplementary Table 4, and Supplementary Figures 6-9). The global age-standardised  
18 DALY rate decreased from 27.20 per 100 000 people (21.70 to 32.39) in 1990 to  
19 20.15 per 100 000 people (16.86 to 23.71) in 2019, with an EAPC of -1.04 (95% CI  
20 -1.06 to -1.01) (Table 1, Figure 2E, and Supplementary Figures 10-11). The same  
21 downward trend was found in the age-standardised YLL rate [EAPC = -1.33 (-1.37 to  
22 -1.30)] and the age-standardised YLD rate [EAPC = -0.62 (-0.70 to -0.53)]  
23 (Supplementary Table 5 and Supplementary Figures 12-14).  
24  
25

26  
27 At the regional level, Western Europe had the greatest number of DALYs [310691  
28 (95% UI 255911 to 371106)] in 2019 (Supplementary Table 1). The highest  
29 age-standardised DALY rates in 2019 were observed in high-income North America  
30 [51.27 per 100 000 people (95% UI 40.90 to 62.35)] (Figure 3C). As shown in Figure  
31 4C, an increase in total DALYs was found across most GBD regions from 1990 to  
32 2019. Most of the GBD regions had a downward trend in the age-standardised DALY  
33 rate, with the largest decrease in Andean Latin America [EAPC = -3.68 (95% CI -4.17  
34 to -3.18)] (Figure 2F).  
35  
36

37  
38 At the national and territorial levels in 2019, China and the United States of  
39 America had the highest number of DALYs [232464 (95% UI 179903 to 291090) and  
40 215289 (175991 to 256059), respectively] (Supplementary Table 2 and  
41 Supplementary Figure 6). The highest age-standardised DALY rate was observed in  
42 Norway in 2019 [80.37 per 100 000 people (56.25 to 108.56)] (Supplementary Table  
43 3 and Supplementary Figure 10). From 1990 to 2019, more than 65% of countries or  
44  
45  
46  
47  
48  
49  
50  
51  
52  
53  
54  
55  
56  
57  
58  
59  
60

territories experienced a decrease in the age-standardised DALY rate of IBD, and the largest decrease was found in Peru [EAPC = -5.08 (95% CI -5.69 to -4.47)] (Supplementary Figure 11).

In 2019, the global number of DALYs was also higher among females than among males (Supplementary Table 1). The age-standardised DALY rate was 20.6 per 100 000 people (95% UI 17.2 to 24.3) among males and 19.7 per 100 000 people (16.2 to 23.5) among females (Table 1). The number of DALYs was highest among males aged 50-54 years and females aged 55-59 years (Figure 5C). The highest number of YLL occurred in the group aged 65-69 years [75234, (63865 to 83022)], while the highest number of YLD occurred in the group aged 45-49 years [80776, (53187 to 113688)] (Supplementary Figure 15). As with prevalent cases and deaths, the DALYs continued to increase for both sexes and were higher among females than among males in all years from 1990 to 2019. The age-standardised DALY rate decreased for both sexes between 1990 and 2019 (Supplementary Figure 16).

### **Burden of IBD by SDI**

A higher SDI was associated with higher age-standardised prevalence rates of IBD, with values that were higher than the global rate in high and high-middle SDI quintiles and lower than the global rate in the other three SDI quintiles (Table 1). The high-SDI quintile had the highest age-standardised prevalence rate, death rate and DALY rate in 2019. Between 1990 and 2019, the age-standardised death rate and age-standardised DALY rate decreased in all SDI quintiles except the high-SDI quintile, where they increased [EAPC = 0.82 (95% CI 0.64 to 1.01)] and remained stable [EAPC = 0.00 (-0.06 to 0.05)], respectively (Table 1 and Figure 2C, 2E). However, the age-standardised prevalence rate decreased in the high and high-middle SDI quintiles and increased in the other three SDI quintiles during the observation period (Table 1 and Figure 2A).

The observed global and regional age-standardised prevalence, death, and DALY rates in relation to SDI are shown in Figure 6, expressed in the annual time series from 1990 to 2019. Regions generally followed the trend of increased death and DALY rates with a higher SDI. However, more than 60% of the regions showed an upward trend in the age-standardised prevalence rate during the study period. At the global level, the age-standardised prevalence, death, and DALY rates dropped with

1  
2  
3  
4 increasing SDI values but were above the expected levels during the past 30 years.  
5  
6

## 7 **Discussion**

8  
9 In this study, we comprehensively analysed the temporal trend in IBD burden at the  
10 global, regional, and national levels. GBD 2019 reported 4.90 million IBD cases  
11 worldwide in 2019 and 4.79 million in 2017, while GBD 2017 reported 6.85 million  
12 in 2017.<sup>16</sup> This discrepancy could be partly attributed to the improved specificity of  
13 case definition since GBD 2019 adjusted administrative data inputs towards expected  
14 stringent diagnosis using previously published IBD data with ICD codes.<sup>11</sup> In  
15 addition, GBD 2019 improved model fit prevalence and incidence by setting more  
16 plausible bounds on excess mortality rate and passing less-informative priors to lower  
17 levels of the geographical hierarchy in DisMod-MR 2.1.<sup>11</sup> Indeed, the GBD 2019  
18 study provides the most current overview of the burden of IBD. It incorporates more  
19 data sources, with some from regions not previously assessed, providing updated  
20 estimates on global IBD epidemiology.<sup>11</sup> In addition, GBD 2019 updated the bias  
21 adjustment, which further improved data reliability.<sup>11</sup> After these adjustments, our  
22 study confirmed two epidemiological shifts in IBD since 1990. The number of  
23 prevalent cases has increased globally since 1990, with China and the United States of  
24 America having the highest number of cases. The age-standardised rates of death and  
25 DALYs decreased, implying substantial improvements in IBD management. The  
26 changing trends and geographical patterns have implications for policy-makers to  
27 prioritise IBD management, especially in newly industrialised countries.  
28  
29  
30  
31  
32  
33  
34  
35  
36  
37  
38  
39  
40  
41  
42  
43  
44  
45

46 The highest age-standardised prevalence rates were observed in high-income North  
47 America, Western Europe, and the high-income Asia Pacific region. This pattern was  
48 also shown in high-SDI countries such as Norway and Canada. This is consistent with  
49 several previous meta-analyses<sup>6,17</sup> and might correlate with several risk factors for  
50 IBD.<sup>18,19</sup> Heavily processed foods with low fibre and high fat content and sugar are a  
51 risk factor for decreased microbial species.<sup>20-22</sup> Other risk factors include smoking,  
52 hygiene, and latitude resulting in vitamin D/sun exposure.<sup>23,24</sup> The largest reduction in  
53 the age-standardised prevalence rate was also observed in high-income North  
54  
55  
56  
57  
58  
59  
60

1  
2  
3  
4 America, which was consistent with the results of some previous reports,<sup>6,25</sup>  
5 indicating the shift in the epidemiological stages of IBD in Western countries.<sup>26,27</sup>  
6

7  
8 Despite increasing numbers of prevalent cases, the global age-standardised  
9 prevalence rate showed a downward trend. This discrepancy reflects the denominator  
10 effects of an increasing global population and age-specific effects.<sup>28</sup> Coward S and his  
11 colleagues<sup>29</sup> reported that the prevalence rate among elderly individuals and adults  
12 was ten times greater than that among paediatric patients in Canada. The trend in the  
13 age-standardised prevalence rate differed substantially between GBD regions. The  
14 greatest upward trend was observed in East Asia. At the national level, China, with a  
15 total number of 911405 IBD patients, was a prominent contributor to the total number  
16 of global IBD cases. This pattern is consistent with several previous reports,<sup>6,30</sup> which  
17 is related mainly to urbanisation, industrialisation, and cultural Westernisation in  
18 some areas of China.<sup>31</sup> With epidemiological surveillance strategies shifting from  
19 paper records to electronic health care databases using International Classification of  
20 Disease (ICD) codes, advances in health care facilities such as the implementation of  
21 endoscopy<sup>32</sup> and the detection and diagnosis of IBD have also increased.  
22

23  
24 IBD causes body disability.<sup>33,34</sup> Consistent with a previous study,<sup>4</sup> the  
25 age-standardised DALY and mortality rates showed a downward trend globally,  
26 especially in East Asia, likely resulting from improved treatment strategies, such as  
27 the early use of biological agents and patient support programs.<sup>35</sup> The introduction of  
28 biological agents improved quality of life and reduced the surgery rate.<sup>30,36</sup>  
29 Unfortunately, the cost of biologic therapy is considerable, estimated at more than  
30 US\$25,000 per year.<sup>37</sup> More attention should be given to optimising patient selection,  
31 dosing and withdrawal.  
32

33  
34 There are some limitations of our study. First, the accuracy of the estimated IBD  
35 burden largely depends on the availability and quality of data acquired, which could  
36 be partially compensated by statistical methods. However, in regions with scarce data,  
37 especially in low-SDI countries, estimates could only rely on predictive covariates or  
38 global trends with consideration of SDI level and data from a single country, which is  
39 less representative. Extra caution should be taken when interpreting data from these  
40  
41  
42  
43  
44  
45  
46  
47  
48  
49  
50  
51  
52  
53  
54  
55  
56  
57  
58  
59  
60

1  
2  
3  
4 areas. Additional high-quality population-based studies should be performed,  
5 especially in countries with scarce data. Second, estimate discrepancies compared to  
6 the results of some of the previously published studies could be further improved,  
7 although GBD 2019 has improved model fit for prevalence and incidence, partly  
8 overcoming the discrepancies. For example, the prevalence rate in Canada was only  
9 46 to 57 per 100,000 people in GBD 2017. However, a rate of approximately 520 per  
10 100,000 people was reported by a previous large population-based study in Canada.<sup>38</sup>  
11 GBD 2019 reported a rate of 357.73 per 100,000 people after adjustment. Third,  
12 UC-specific and CD-specific trends were not assessed due to the lack of relevant data.  
13 The association between IBD and certain risk factors should also be included in the  
14 future. Nevertheless, GBD 2019 provides the most up-to-date global IBD  
15 epidemiology estimates for the last three decades and implications for new  
16 hypotheses. It covers 204 countries. Therefore, GBD 2019 generates more  
17 representative data and can compensate for biases in individual studies.  
18  
19  
20  
21  
22  
23  
24  
25  
26  
27  
28  
29

### 30 31 **Conclusions**

32  
33 Despite the reduction in age-standardised rates of prevalence, deaths, and DALYs,  
34 IBD will continue to be a major public health burden due to increasing numbers of  
35 prevalent cases worldwide. However, the trend has shifted substantially since 1990.  
36 Although the age-standardised prevalence rate has increased rapidly in newly  
37 industrialised countries, especially in East Asia, the incidence has stabilised or even  
38 decreased in Western countries such as those in high-income North America. The  
39 prevalence of IBD in newly industrialised countries is quickly approaching that in  
40 Western countries. More systematic epidemiologic monitoring strategies, especially in  
41 low-SDI countries, and the integration of risk factors into the estimate model of the  
42 GBD Study would further facilitate IBD management. Our findings might help some  
43 policy-makers justify medical resource allocation, especially in low-SDI countries.  
44  
45  
46  
47  
48  
49  
50  
51  
52  
53  
54  
55

### 56 **Abbreviations**

57  
58 EAPC, estimated annual percentage change; IBD, inflammatory bowel disease; SDI,  
59 socio-demographic index; GBD, Global Burden of Disease, Injuries, and Risk Factors  
60

1  
2  
3  
4 Study; DALYs, disability adjusted life years; YLDs, years of life lived with disability;  
5  
6 YLLs, years of life lost; IHME, Institute for Health Metrics and Evaluation;  
7  
8 GATHER, Guidelines for Accurate and Transparent Health Estimates Reporting;  
9  
10 ASR, age-standardised rate; UI, uncertainty interval; CI, confidence interval.  
11  
12

### 13 **Ethics approval and consent to participate**

14  
15 This study did not involve human participants and the study did not need ethics  
16  
17 approval because it used publicly available data.  
18  
19

### 20 **Consent for publication**

21  
22 Not applicable.  
23  
24  
25

### 26 **Data availability statement**

27  
28 All data relevant to the study are included in the article or uploaded as supplementary  
29  
30 information.  
31  
32

### 33 **Declaration of interests**

34  
35 The authors declare no conflict of interests.  
36  
37  
38  
39

### 40 **Funding**

41  
42 This work was supported by the National Science Foundation of China (Grant No.  
43  
44 82000527) and the Natural Science Foundation of Hunan Province (Grant No.  
45  
46 2022JJ30909).  
47  
48  
49

### 50 **Disclaimer**

51  
52 The funding source had no role in the design, conduct or reporting of the study.  
53  
54  
55

### 56 **Author Contributions**

57  
58 Study concept and design: Decai Zhang and Rui Wang. Acquisition of data: Zhaoqi Li  
59  
60 and Shaojun Liu. Data analysis and interpretation: Rui Wang RW, Zhaoqi Li, Shaojun

Liu, and Decai Zhang. Drafting the manuscript: Decai Zhang and Rui Wang. Critical revision of manuscript: all authors. All authors had full access to all the data in the study and had final responsibility for the decisions to submit for publication.

### Acknowledgements

We would like to thank all members of the Institute for Health Metrics and Evaluation (IHME), and Bill & Melinda Gates Foundation which support the related GBD 2019 studies.

### Authors' information

<sup>1</sup>Department of Gastroenterology, The Third Xiangya Hospital of Central South University, Changsha 410013, Hunan Province, China. <sup>2</sup>Hunan Key Laboratory of Nonresolving Inflammation and Cancer, Changsha 410013, Hunan Province, China.

### References

1. Seyed Tabib NS, Madgwick M, Sudhakar P, Verstockt B, Korcsmaros T, Vermeire S. Big data in IBD: big progress for clinical practice. *Gut*. 2020;69(8):1520-1532.
2. Magro F, Gionchetti P, Eliakim R, et al. Third European Evidence-based Consensus on Diagnosis and Management of Ulcerative Colitis. Part 1: Definitions, Diagnosis, Extra-intestinal Manifestations, Pregnancy, Cancer Surveillance, Surgery, and Ileo-anal Pouch Disorders. *J Crohns Colitis*. 2017;11(6):649-670.
3. Agrawal M, Spencer EA, Colombel JF, Ungaro RC. Approach to the Management of Recently Diagnosed Inflammatory Bowel Disease Patients: A User's Guide for Adult and Pediatric Gastroenterologists. *Gastroenterology*. 2021;161(1):47-65.
4. Piovani D, Danese S, Peyrin-Biroulet L, Bonovas S. Inflammatory bowel disease: estimates from the global burden of disease 2017 study. *Aliment Pharmacol Ther*. 2020;51(2):261-270.
5. Guan Q. A Comprehensive Review and Update on the Pathogenesis of Inflammatory Bowel Disease. *J Immunol Res*. 2019;2019:7247238.
6. Ng SC, Shi HY, Hamidi N, et al. Worldwide incidence and prevalence of inflammatory bowel disease in the 21st century: a systematic review of population-based studies. *Lancet*. 2017;390(10114):2769-2778.
7. Khalili H. The Changing Epidemiology of Inflammatory Bowel Disease: What Goes Up May Come Down. *Inflamm Bowel Dis*. 2020;26(4):591-592.
8. Collaborators GBDD. Global age-sex-specific fertility, mortality, healthy life expectancy (HALE), and population estimates in 204 countries and territories, 1950-2019: a comprehensive demographic analysis for the Global Burden of Disease Study 2019. *Lancet*.



- 2020;396(10258):1160-1203.
9. Diseases GBD, Injuries C. Global burden of 369 diseases and injuries in 204 countries and territories, 1990-2019: a systematic analysis for the Global Burden of Disease Study 2019. *Lancet*. 2020;396(10258):1204-1222.
  10. Collaborators GBDUHC. Measuring universal health coverage based on an index of effective coverage of health services in 204 countries and territories, 1990-2019: a systematic analysis for the Global Burden of Disease Study 2019. *Lancet*. 2020;396(10258):1250-1284.
  11. Collaborators GBDRF. Global burden of 87 risk factors in 204 countries and territories, 1990-2019: a systematic analysis for the Global Burden of Disease Study 2019. *Lancet*. 2020;396(10258):1223-1249.
  12. Collaborators GBDM. Global, regional, and national under-5 mortality, adult mortality, age-specific mortality, and life expectancy, 1970-2016: a systematic analysis for the Global Burden of Disease Study 2016. *Lancet*. 2017;390(10100):1084-1150.
  13. Alcohol GBD, Drug Use C. The global burden of disease attributable to alcohol and drug use in 195 countries and territories, 1990-2016: a systematic analysis for the Global Burden of Disease Study 2016. *Lancet Psychiatry*. 2018;5(12):987-1012.
  14. Deng Y, Zhao P, Zhou L, et al. Epidemiological trends of tracheal, bronchus, and lung cancer at the global, regional, and national levels: a population-based study. *J Hematol Oncol*. 2020;13(1):98.
  15. Stevens GA, Alkema L, Black RE, et al. Guidelines for Accurate and Transparent Health Estimates Reporting: the GATHER statement. *Lancet*. 2016;388(10062):e19-e23.
  16. Collaborators GBDIBD. The global, regional, and national burden of inflammatory bowel disease in 195 countries and territories, 1990-2017: a systematic analysis for the Global Burden of Disease Study 2017. *Lancet Gastroenterol Hepatol*. 2020;5(1):17-30.
  17. Ye Y, Manne S, Treem WR, Bennett D. Prevalence of Inflammatory Bowel Disease in Pediatric and Adult Populations: Recent Estimates From Large National Databases in the United States, 2007-2016. *Inflamm Bowel Dis*. 2020;26(4):619-625.
  18. de Souza HSP, Fiocchi C, Iliopoulos D. The IBD interactome: an integrated view of aetiology, pathogenesis and therapy. *Nat Rev Gastroenterol Hepatol*. 2017;14(12):739-749.
  19. Ng SC, Tsoi KK, Kamm MA, et al. Genetics of inflammatory bowel disease in Asia: systematic review and meta-analysis. *Inflamm Bowel Dis*. 2012;18(6):1164-1176.
  20. Ananthakrishnan AN, Khalili H, Konijeti GG, et al. A prospective study of long-term intake of dietary fiber and risk of Crohn's disease and ulcerative colitis. *Gastroenterology*. 2013;145(5):970-977.
  21. Suez J, Korem T, Zeevi D, et al. Artificial sweeteners induce glucose intolerance by altering the gut microbiota. *Nature*. 2014;514(7521):181-186.
  22. Ananthakrishnan AN. Environmental risk factors for inflammatory bowel diseases: a review. *Dig Dis Sci*. 2015;60(2):290-298.
  23. Kaplan GG, Ng SC. Understanding and Preventing the Global Increase of Inflammatory Bowel Disease. *Gastroenterology*. 2017;152(2):313-321 e312.
  24. Piovani D, Danese S, Peyrin-Biroulet L, Bonovas S. Environmental, Nutritional, and Socioeconomic Determinants of IBD Incidence: A Global Ecological Study. *J Crohns Colitis*. 2020;14(3):323-331.
  25. Zhao M, Gonczi L, Lakatos PL, Burisch J. The Burden of Inflammatory Bowel Disease in

- 1  
2  
3 Europe in 2020. *J Crohns Colitis*. 2021;15(9):1573-1587.
- 4 26. Kaplan GG, Windsor JW. The four epidemiological stages in the global evolution of  
5 inflammatory bowel disease. *Nat Rev Gastroenterol Hepatol*. 2021;18(1):56-66.
- 6 27. Kaplan GG. The global burden of IBD: from 2015 to 2025. *Nat Rev Gastroenterol Hepatol*.  
7 2015;12(12):720-727.
- 8 28. Collaborators GBDM. Global, regional, and national age-sex-specific mortality and life  
9 expectancy, 1950-2017: a systematic analysis for the Global Burden of Disease Study 2017.  
10 *Lancet*. 2018;392(10159):1684-1735.
- 11 29. Coward S, Clement F, Benchimol EI, et al. Past and Future Burden of Inflammatory Bowel  
12 Diseases Based on Modeling of Population-Based Data. *Gastroenterology*.  
13 2019;156(5):1345-1353 e1344.
- 14 30. Qiu Y, Ren W, Liu Y, Chen WE, Pan XH, Ren JJ. Disease burden of inflammatory bowel  
15 disease in China from 1990 to 2017: Findings from the global burden of diseases 2017.  
16 *EClinicalMedicine*. 2020;27:100544.
- 17 31. Su HJ, Chiu YT, Chiu CT, et al. Inflammatory bowel disease and its treatment in 2018: Global  
18 and Taiwanese status updates. *J Formos Med Assoc*. 2019;118(7):1083-1092.
- 19 32. Pavlovic-Calic N, Salkic NN, Gegic A, Smajic M, Alibegovic E. Crohn's disease in Tuzla  
20 region of Bosnia and Herzegovina: a 12-year study (1995-2006). *Int J Colorectal Dis*.  
21 2008;23(10):957-964.
- 22 33. Shafer LA, Sofia MA, Rubin DT, et al. An International Multicenter Comparison of  
23 IBD-Related Disability and Validation of the IBDDI. *Clin Gastroenterol Hepatol*.  
24 2021;19(12):2524-2531.
- 25 34. Marinelli C, Zingone F, Inferrera M, et al. Factors associated with disability in patients with  
26 ulcerative colitis: A cross-sectional study. *J Dig Dis*. 2020;21(2):81-87.
- 27 35. Jones JL, Nguyen GC, Benchimol EI, et al. The Impact of Inflammatory Bowel Disease in  
28 Canada 2018: Quality of Life. *J Can Assoc Gastroenterol*. 2019;2(Suppl 1):S42-S48.
- 29 36. Frolkis AD, Lipton DS, Fiest KM, et al. Cumulative incidence of second intestinal resection in  
30 Crohn's disease: a systematic review and meta-analysis of population-based studies. *Am J*  
31 *Gastroenterol*. 2014;109(11):1739-1748.
- 32 37. Marchetti M, Liberato NL. Biological therapies in Crohn's disease: are they cost-effective? A  
33 critical appraisal of model-based analyses. *Expert Rev Pharmacoecon Outcomes Res*.  
34 2014;14(6):815-824.
- 35 38. Benchimol EI, Manuel DG, Guttman A, et al. Changing age demographics of inflammatory  
36 bowel disease in Ontario, Canada: a population-based cohort study of epidemiology trends.  
37 *Inflamm Bowel Dis*. 2014;20(10):1761-1769.
- 38  
39  
40  
41  
42  
43  
44  
45  
46  
47  
48  
49  
50  
51  
52  
53  
54  
55  
56  
57  
58  
59  
60

### Figure legends

**Figure 1.** The global prevalence burden of IBD in 204 countries and territories. (A) The absolute number of IBD prevalent cases in 2017. (B) The age-standardised prevalence rate (per 100 000 population) of IBD in 2017. (C) The EAPC of age-standardised prevalence rate for IBD between 1990 and 2019.

EAPC=estimated annual percentage change. IBD=inflammatory bowel disease.

**Figure 2.** The EAPCs in age-standardised rates of prevalence (A, B), deaths (C, D), and DALYs (E, F) due to IBD from 1990 to 2019, both sexes, by GBD region, and by SDI quintile.

DALYs=disability adjusted life years. EAPC=estimated annual percentage change. GBD=Global Burden of Disease. IBD=inflammatory bowel disease. SDI=Socio-demographic Index.

**Figure 3.** The age-standardised rates of prevalence (A), deaths (B), and DALYs (C) due to IBD by sex, across 21 regions, in 2019.

Error bars indicate the 95% uncertainty interval (UI) for the age-standardised rates. DALYs=disability adjusted life years. IBD=inflammatory bowel disease.

**Figure 4.** The absolute number of prevalent cases (A), deaths (B), and DALYs (C) due to IBD for all GBD regions from 1990 to 2019.

DALYs=disability adjusted life years. GBD=Global Burden of Disease. IBD=inflammatory bowel disease.

**Figure 5.** Age patterns by sex of the total number and age-standardised rates of prevalent cases (A), deaths (B), and DALYs (C) due to IBD at the global level in 2019.

Error bars indicate the 95% uncertainty interval (UI) for the number of cases. Shading indicates the 95% UI for the rates. DALYs=disability adjusted life years. IBD=inflammatory bowel disease.

**Figure 6.** The age-standardised rates of IBD prevalence (A), deaths (B), and DALYs globally and for 21 GBD regions by SDI from 1990 to 2019.

The expected age-standardised rates in 2019 based solely on SDI were represented by the black line. For each region, points from left to right depict estimates from each year from 1990 to 2019. DALYs=disability adjusted life years. GBD=Global Burden of Disease. IBD=inflammatory bowel disease. SDI=Socio-demographic Index.

**Table 1** Age-standardised prevalence, death and DALY rates for inflammatory bowel disease (IBD) in 1990 and 2019 and their temporal trends from 1990 to 2019

| Characteristics                  | Age-standardised prevalence rate |                                 |                           | Age-standardized death rate |                        |                           | Age-standardized DALY rate |                           |                           |
|----------------------------------|----------------------------------|---------------------------------|---------------------------|-----------------------------|------------------------|---------------------------|----------------------------|---------------------------|---------------------------|
|                                  | per 100,000 population           |                                 |                           | per 100,000 population      |                        |                           | per 100,000 population     |                           |                           |
|                                  | 1990 No.<br>(95%UI)              | 2019 No.<br>(95%UI)             | EAPC No.<br>(95%CI)       | 1990 No.<br>(95%UI)         | 2019 No.<br>(95%UI)    | EAPC No.<br>(95%CI)       | 1990 No.<br>(95%UI)        | 2019 No.<br>(95%UI)       | EAPC No.<br>(95%CI)       |
| Global                           | 73.23 (63.86<br>to 83.63)        | 59.25 (52.78<br>to 66.47)       | -0.66 (-0.75<br>to -0.57) | 0.67 (0.57<br>to 0.78)      | 0.54 (0.46<br>to 0.59) | -0.69 (-0.81<br>to -0.57) | 27.20 (21.70<br>to 32.39)  | 20.15 (16.86<br>to 23.71) | -1.04 (-1.06<br>to -1.01) |
| Sex                              |                                  |                                 |                           |                             |                        |                           |                            |                           |                           |
| Male                             | 71.52 (62.12<br>to 81.89)        | 59.30 (52.60<br>to 66.91)       | -0.56 (-0.64<br>to -0.49) | 0.69 (0.56<br>to 0.88)      | 0.56 (0.45<br>to 0.62) | -0.78 (-0.83<br>to -0.72) | 27.40 (21.78<br>to 33.22)  | 20.64 (17.16<br>to 24.31) | -0.99 (-1.01<br>to -0.97) |
| Female                           | 75.01 (65.67<br>to 85.45)        | 59.33 (52.89<br>to 66.18)       | -0.74 (-0.85<br>to -0.64) | 0.63 (0.50<br>to 0.74)      | 0.52 (0.43<br>to 0.58) | -0.64 (-0.80<br>to -0.47) | 27.09 (20.30<br>to 32.42)  | 19.70 (16.16<br>to 23.49) | -1.09 (-1.12<br>to -1.06) |
| SDI quintile                     |                                  |                                 |                           |                             |                        |                           |                            |                           |                           |
| High                             | 200.83<br>(176.43 to<br>226.92)  | 183.14<br>(166.58 to<br>201.17) | -0.34 (-0.43<br>to -0.24) | 0.72 (0.65<br>to 0.85)      | 0.84 (0.69<br>to 0.92) | 0.82 (0.64<br>to 1.01)    | 43.95 (34.13<br>to 55.06)  | 42.93 (33.66<br>to 53.08) | 0.00 (-0.06<br>to 0.05)   |
| High-middle                      | 82.41 (71.42<br>to 95.06)        | 73.85 (65.38<br>to 83.09)       | -0.32 (-0.47<br>to -0.18) | 0.52 (0.46<br>to 0.60)      | 0.38 (0.34<br>to 0.43) | -1.17 (-1.32<br>to -1.02) | 25.92 (21.34<br>to 30.93)  | 19.34 (15.59<br>to 23.73) | -1.12 (-1.17<br>to -1.07) |
| Middle                           | 22.50 (19.00<br>to 26.62)        | 30.57 (25.70<br>to 36.01)       | 1.25 (1.04 to<br>1.47)    | 0.57 (0.40<br>to 0.74)      | 0.31 (0.26<br>to 0.34) | -2.44 (-2.59<br>to -2.29) | 18.11 (14.29<br>to 21.72)  | 11.61 (9.70<br>to 13.71)  | -1.63 (-1.68<br>to -1.58) |
| Low-middle                       | 19.02 (15.75<br>to 22.93)        | 20.94 (17.41<br>to 25.11)       | 0.52 (0.40 to<br>0.64)    | 0.74 (0.47<br>to 1.06)      | 0.48 (0.38<br>to 0.58) | -1.75 (-1.90<br>to -1.60) | 23.29 (16.18<br>to 30.53)  | 15.37 (12.47<br>to 18.32) | -1.58 (-1.65<br>to -1.51) |
| Low                              | 12.40 (10.21<br>to 15.06)        | 12.85 (10.64<br>to 15.81)       | 0.29 (0.19 to<br>0.39)    | 0.67 (0.48<br>to 0.99)      | 0.55 (0.43<br>to 0.70) | -0.80 (-0.86<br>to -0.74) | 22.19 (14.49<br>to 29.80)  | 17.19 (13.57<br>to 21.70) | -0.94 (-0.99<br>to -0.89) |
| BD region                        |                                  |                                 |                           |                             |                        |                           |                            |                           |                           |
| Andean Latin<br>America          | 16.55 (14.08<br>to 19.39)        | 17.09 (14.60<br>to 19.88)       | 0.06 (0.03 to<br>0.10)    | 0.54 (0.36<br>to 0.71)      | 0.26 (0.20<br>to 0.32) | -2.74 (-3.16<br>to -2.32) | 26.36 (15.78<br>to 38.96)  | 9.83 (7.75<br>to 12.19)   | -3.68 (-4.17<br>to -3.18) |
| Australasia                      | 108.86<br>(92.21 to<br>126.63)   | 156.30<br>(137.65 to<br>177.07) | 0.83 (0.61 to<br>1.05)    | 0.54 (0.47<br>to 0.64)      | 0.72 (0.53<br>to 0.83) | 1.77 (1.41<br>to 2.13)    | 26.19 (20.48<br>to 32.91)  | 34.98 (26.87<br>to 44.64) | 0.93 (0.75<br>to 1.12)    |
| Caribbean                        | 27.93 (23.96<br>to 32.85)        | 26.31 (22.13<br>to 31.28)       | -0.05 (-0.13<br>to 0.03)  | 0.56 (0.44<br>to 0.69)      | 0.42 (0.31<br>to 0.53) | -1.24 (-1.41<br>to -1.08) | 23.38 (16.68<br>to 34.05)  | 18.21 (13.08<br>to 24.76) | -0.91 (-1.06<br>to -0.76) |
| Central Asia                     | 76.86 (64.98<br>to 91.56)        | 78.72 (66.39<br>to 93.40)       | 0.09 (0.05 to<br>0.12)    | 0.39 (0.30<br>to 0.46)      | 0.32 (0.28<br>to 0.37) | -1.00 (-1.12<br>to -0.89) | 26.11 (21.03<br>to 31.71)  | 22.26 (18.04<br>to 27.31) | -0.70 (-0.76<br>to -0.65) |
| Central Europe                   | 208.99<br>(179.90 to<br>243.75)  | 160.49<br>(145.58 to<br>176.95) | -1.25 (-1.64<br>to -0.87) | 0.46 (0.43<br>to 0.52)      | 0.47 (0.40<br>to 0.55) | 0.30 (0.17<br>to 0.44)    | 46.28 (36.16<br>to 57.91)  | 35.84 (27.66<br>to 44.67) | -1.08 (-1.37<br>to -0.78) |
| Central Latin<br>America         | 37.84 (32.42<br>to 44.16)        | 32.59 (27.93<br>to 38.07)       | -0.49 (-0.58<br>to -0.41) | 0.32 (0.28<br>to 0.35)      | 0.37 (0.30<br>to 0.43) | 0.98 (0.68<br>to 1.28)    | 14.84 (12.69<br>to 17.31)  | 14.68 (12.25<br>to 17.41) | 0.32 (0.08<br>to 0.56)    |
| Central<br>Sub-Saharan<br>Africa | 8.22 (6.76 to<br>10.11)          | 8.21 (6.80<br>to 10.11)         | -0.14 (-0.33<br>to 0.06)  | 0.72 (0.51<br>to 1.03)      | 0.60 (0.45<br>to 0.83) | -0.69 (-0.77<br>to -0.60) | 22.26 (14.75<br>to 32.74)  | 17.77 (12.98<br>to 24.27) | -0.79 (-0.88<br>to -0.70) |

|    |                |                         |                        |                        |                     |                     |                        |                        |                        |                        |
|----|----------------|-------------------------|------------------------|------------------------|---------------------|---------------------|------------------------|------------------------|------------------------|------------------------|
| 1  |                |                         |                        |                        |                     |                     |                        |                        |                        |                        |
| 2  |                |                         |                        |                        |                     |                     |                        |                        |                        |                        |
| 3  |                |                         |                        |                        |                     |                     |                        |                        |                        |                        |
| 4  | East Asia      | 22.51 (18.72 to 26.72)  | 46.22 (39.36 to 53.98) | 2.79 (2.41 to 3.18)    | 0.86 (0.59 to 1.14) | 0.31 (0.25 to 0.35) | -3.98 (-4.33 to -3.63) | 24.23 (17.74 to 29.83) | 13.08 (10.31 to 16.19) | -2.31 (-2.48 to -2.15) |
| 5  |                |                         |                        |                        |                     |                     |                        |                        |                        |                        |
| 6  | Eastern Europe | 88.07 (75.40 to 103.25) | 82.82 (70.77 to 96.45) | 0.01 (-0.11 to 0.14)   | 0.49 (0.38 to 0.56) | 0.51 (0.43 to 0.58) | -0.25 (-0.53 to 0.04)  | 27.68 (21.86 to 33.71) | 26.67 (21.96 to 32.46) | -0.30 (-0.45 to -0.14) |
| 7  |                |                         |                        |                        |                     |                     |                        |                        |                        |                        |
| 8  | Eastern        |                         |                        |                        |                     |                     |                        |                        |                        |                        |
| 9  | Sub-Saharan    | 6.27 (5.25 to 7.68)     | 7.21 (6.01 to 8.82)    | 0.46 (0.42 to 0.50)    | 0.72 (0.52 to 1.01) | 0.69 (0.50 to 0.93) | -0.12 (-0.20 to -0.05) | 22.58 (16.13 to 33.35) | 19.44 (14.69 to 25.63) | -0.46 (-0.54 to -0.39) |
| 10 | Africa         |                         |                        |                        |                     |                     |                        |                        |                        |                        |
| 11 |                | 126.18                  | 210.54                 |                        |                     |                     |                        |                        |                        |                        |
| 12 | High-income    | (105.73 to 149.32)      | (183.69 to 239.68)     | 1.04 (0.68 to 1.41)    | 0.40 (0.24 to 0.47) | 0.13 (0.11 to 0.18) | -4.29 (-4.64 to -3.93) | 26.43 (19.87 to 33.86) | 34.55 (23.75 to 46.76) | 0.35 (0.11 to 0.60)    |
| 13 | Asia Pacific   |                         |                        |                        |                     |                     |                        |                        |                        |                        |
| 14 |                | 346.93                  | 209.60                 |                        |                     |                     |                        |                        |                        |                        |
| 15 | High-income    | (303.63 to 392.66)      | (195.48 to 224.46)     | -1.32 (-1.75 to -0.89) | 0.68 (0.61 to 0.83) | 0.97 (0.79 to 1.05) | 1.43 (1.15 to 1.72)    | 65.62 (48.61 to 84.95) | 51.27 (40.90 to 62.35) | -0.46 (-0.72 to -0.20) |
| 16 | North America  |                         |                        |                        |                     |                     |                        |                        |                        |                        |
| 17 |                |                         |                        |                        |                     |                     |                        |                        |                        |                        |
| 18 | North Africa   |                         |                        |                        |                     |                     |                        |                        |                        |                        |
| 19 | and Middle     | 36.27 (31.06 to 41.91)  | 48.26 (40.98 to 56.94) | 0.97 (0.84 to 1.10)    | 0.34 (0.24 to 0.49) | 0.26 (0.22 to 0.30) | -0.86 (-0.93 to -0.80) | 14.36 (10.79 to 18.73) | 13.26 (10.60 to 16.47) | -0.30 (-0.34 to -0.25) |
| 20 | East           |                         |                        |                        |                     |                     |                        |                        |                        |                        |
| 21 |                | 4.34 (3.51 to 5.20)     | 3.87 (3.16 to 4.71)    | -0.54 (-0.72 to -0.35) | 0.63 (0.42 to 0.86) | 0.44 (0.33 to 0.60) | -1.41 (-1.50 to -1.32) | 20.60 (13.34 to 28.78) | 14.93 (10.45 to 21.01) | -1.29 (-1.38 to -1.20) |
| 22 | Oceania        |                         |                        |                        |                     |                     |                        |                        |                        |                        |
| 23 |                | 19.68 (15.98 to 24.40)  | 20.11 (16.38 to 24.81) | 0.26 (0.10 to 0.42)    | 0.69 (0.47 to 1.06) | 0.44 (0.33 to 0.57) | -1.91 (-2.07 to -1.74) | 21.48 (14.77 to 29.47) | 14.00 (10.70 to 17.52) | -1.68 (-1.78 to -1.58) |
| 24 | South Asia     |                         |                        |                        |                     |                     |                        |                        |                        |                        |
| 25 |                | 4.40 (3.55 to 5.35)     | 6.69 (5.52 to 8.04)    | 1.58 (1.27 to 1.90)    | 0.50 (0.27 to 0.66) | 0.28 (0.21 to 0.33) | -2.36 (-2.52 to -2.19) | 13.16 (8.47 to 15.9)   | 7.45 (6.06 to 8.76)    | -2.29 (-2.44 to -2.15) |
| 26 | Southeast Asia |                         |                        |                        |                     |                     |                        |                        |                        |                        |
| 27 |                | 19.22 (15.96 to 22.60)  | 20.53 (17.36 to 24.24) | 0.28 (0.08 to 0.49)    | 0.31 (0.27 to 0.34) | 0.28 (0.25 to 0.34) | -0.46 (-0.62 to -0.30) | 11.10 (9.69 to 12.66)  | 10.06 (8.61 to 11.94)  | -0.40 (-0.50 to -0.31) |
| 28 | Southern Latin |                         |                        |                        |                     |                     |                        |                        |                        |                        |
| 29 | America        |                         |                        |                        |                     |                     |                        |                        |                        |                        |
| 30 |                | 10.44 (8.67 to 12.74)   | 11.78 (9.83 to 14.31)  | 0.53 (0.45 to 0.61)    | 0.42 (0.33 to 0.53) | 0.44 (0.36 to 0.51) | 0.25 (-0.16 to 0.65)   | 15.11 (10.88 to 18.87) | 13.66 (11.37 to 15.90) | -0.12 (-0.44 to 0.20)  |
| 31 | Sub-Saharan    |                         |                        |                        |                     |                     |                        |                        |                        |                        |
| 32 | Africa         |                         |                        |                        |                     |                     |                        |                        |                        |                        |
| 33 |                | 65.14 (57.26 to 74.08)  | 47.34 (41.21 to 54.02) | -0.87 (-1.08 to -0.65) | 0.47 (0.41 to 0.51) | 0.44 (0.40 to 0.51) | 0.03 (-0.14 to 0.21)   | 23.37 (19.94 to 27.30) | 19.26 (16.53 to 22.44) | -0.44 (-0.61 to -0.26) |
| 34 | Tropical Latin |                         |                        |                        |                     |                     |                        |                        |                        |                        |
| 35 | America        |                         |                        |                        |                     |                     |                        |                        |                        |                        |
| 36 |                | 156.46                  | 188.22                 |                        |                     |                     |                        |                        |                        |                        |
| 37 | Western Europe | (139.89 to 173.69)      | (169.47 to 207.48)     | 0.37 (0.26 to 0.48)    | 0.82 (0.73 to 1.04) | 1.11 (0.87 to 1.23) | 1.51 (1.27 to 1.75)    | 39.24 (31.18 to 48.16) | 46.79 (36.98 to 57.57) | 0.59 (0.49 to 0.69)    |
| 38 |                |                         |                        |                        |                     |                     |                        |                        |                        |                        |
| 39 | Western        |                         |                        |                        |                     |                     |                        |                        |                        |                        |
| 40 | Sub-Saharan    | 8.49 (7.03 to 10.33)    | 10.09 (8.38 to 12.23)  | 0.78 (0.66 to 0.90)    | 0.56 (0.33 to 0.91) | 0.5 (0.35 to 0.67)  | -0.37 (-0.46 to -0.28) | 19.69 (11.64 to 30.47) | 16.77 (11.61 to 22.73) | -0.57 (-0.66 to -0.48) |
| 41 | Africa         |                         |                        |                        |                     |                     |                        |                        |                        |                        |

Abbreviations: CI, confidence interval; DALY, disability adjusted life year; EAPC, estimated annual percentage change; GBD, Global Burden of Disease; SDI, Socio-demographic Index; UI, uncertainty interval.



Figure 1. The global prevalence burden of IBD in 204 countries and territories. (A) The absolute number of IBD prevalent cases in 2017. (B) The age-standardised prevalence rate (per 100 000 population) of IBD in 2017. (C) The EAPC of age-standardised prevalence rate for IBD between 1990 and 2019. EAPC=estimated annual percentage change. IBD=inflammatory bowel disease.

128x156mm (600 x 600 DPI)



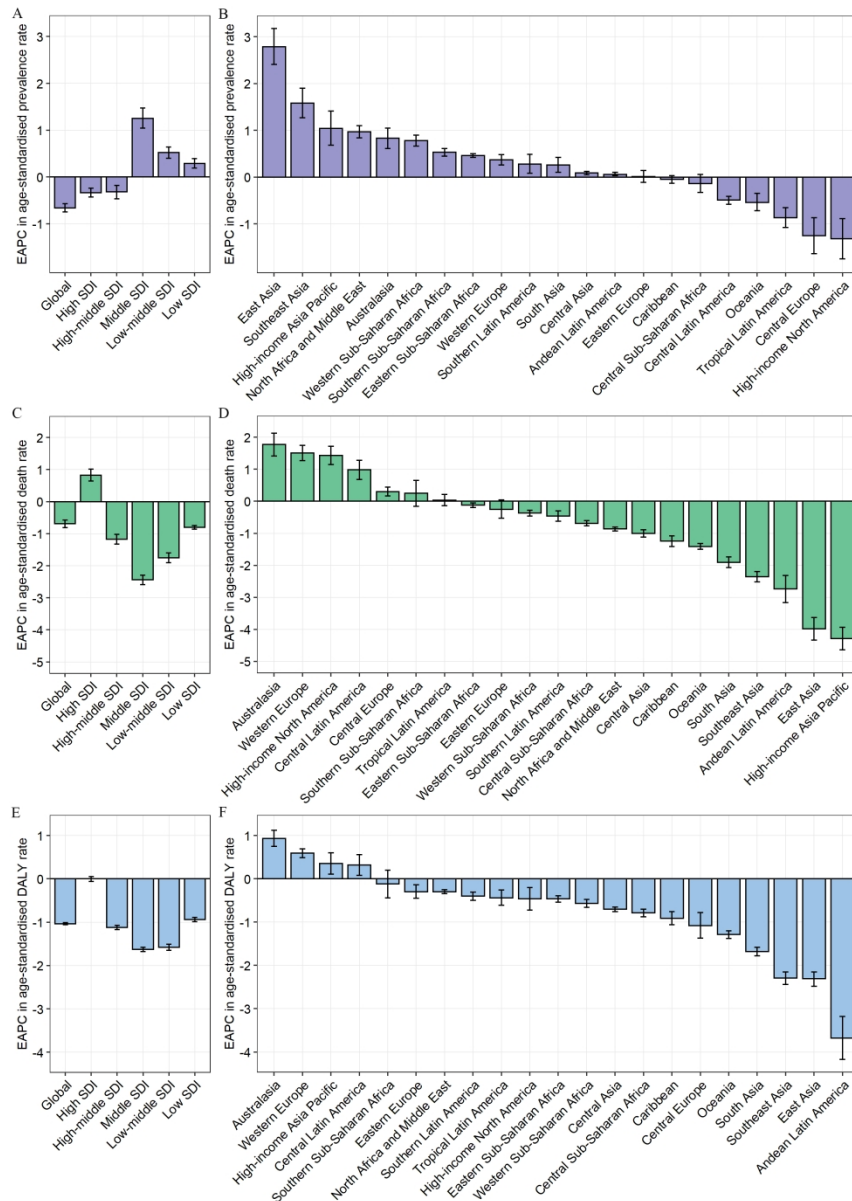

Figure 2. The EAPCs in age-standardised rates of prevalence (A, B), deaths (C, D), and DALYs (E, F) due to IBD from 1990 to 2019, both sexes, by GBD region, and by SDI quintile. DALYs=disability adjusted life years. EAPC=estimated annual percentage change. GBD=Global Burden of Disease. IBD=inflammatory bowel disease. SDI=Socio-demographic Index.

119x166mm (600 x 600 DPI)





Figure 3. The age-standardised rates of prevalence (A), deaths (B), and DALYs (C) due to IBD by sex, across 21 regions, in 2019. Error bars indicate the 95% uncertainty interval (UI) for the age-standardised rates. DALYs=disability adjusted life years. IBD=inflammatory bowel disease.

82x141mm (600 x 600 DPI)



Figure 4. The absolute number of prevalent cases (A), deaths (B), and DALYs (C) due to IBD for all GBD regions from 1990 to 2019.

DALYs=disability adjusted life years. GBD=Global Burden of Disease. IBD=inflammatory bowel disease.

104x113mm (600 x 600 DPI)



Figure 5. Age patterns by sex of the total number and age-standardised rates of prevalent cases (A), deaths (B), and DALYs (C) due to IBD at the global level in 2019. Error bars indicate the 95% uncertainty interval (UI) for the number of cases. Shading indicates the 95% UI for the rates. DALYs=disability adjusted life years. IBD=inflammatory bowel disease.

84x148mm (600 x 600 DPI)



Figure 6. The age-standardised rates of IBD prevalence (A), deaths (B), and DALYs globally and for 21 GBD regions by SDI from 1990 to 2019.

The expected age-standardised rates in 2019 based solely on SDI were represented by the black line. For each region, points from left to right depict estimates from each year from 1990 to 2019. DALYs=disability adjusted life years. GBD=Global Burden of Disease. IBD=inflammatory bowel disease. SDI=Socio-demographic Index.

159x194mm (600 x 600 DPI)

1  
2  
3 Supplement to: **The global, regional and national burden of inflammatory bowel**  
4 **disease in 204 countries and territories from 1990 to 2019, based on Global**  
5 **Burden Disease Study 2019**  
6  
7

8 **Contents:**  
9

10 **Supplementary Figures**  
11

12  
13  
14 Supplementary Figure 1: Trends from 1990 to 2019 in number and age-standardised  
15 prevalence rate of IBD at the global level.  
16

17  
18 Supplementary Figure 2: The absolute number of deaths due to IBD for 204 countries  
19 and territories in 2019.  
20

21  
22 Supplementary Figure 3: The age-standardised death rate (per 100 000 population) of  
23 IBD for 204 countries and territories in 2019.  
24

25  
26 Supplementary Figure 4: The EAPC of age-standardised death rate for IBD in 204  
27 countries and territories between 1990 and 2019.  
28

29  
30 Supplementary Figure 5: Trends from 1990 to 2019 in number and age-standardised  
31 death rate of IBD at the global level.  
32

33  
34 Supplementary Figure 6: The absolute number of DALYs due to IBD for 204  
35 countries and territories in 2019.  
36

37  
38 Supplementary Figure 7: The absolute number of incident cases due to IBD for 204  
39 countries and territories in 2019.  
40

41  
42 Supplementary Figure 8: The absolute number of YLLs due to IBD for 204 countries  
43 and territories in 2019.  
44

45  
46 Supplementary Figure 9: The absolute number of YLDs due to IBD for 204 countries  
47 and territories in 2019.  
48

49  
50 Supplementary Figure 10: The age-standardised DALY rate (per 100 000 population)  
51 of IBD for 204 countries and territories in 2019.  
52

53  
54 Supplementary Figure 11: The EAPC of age-standardised DALY rate for IBD in 204  
55 countries and territories between 1990 and 2019.  
56

57  
58 Supplementary Figure 12: The EAPC of age-standardised incidence rate for IBD in  
59 204 countries and territories between 1990 and 2019.  
60

1  
2  
3 Supplementary Figure 13: The EAPC of age-standardised YLL rate for IBD in 204  
4 countries and territories between 1990 and 2019.  
5

6  
7 Supplementary Figure 14: The EAPC of age-standardised YLD rate for IBD in 204  
8 countries and territories between 1990 and 2019.  
9

10  
11 Supplementary Figure 15: Global counts and age-specific rates of YLLs and YLDs  
12 due to IBD across age group in 2019.  
13

14  
15 Supplementary Figure 16: Trends from 1990 to 2019 in number and age-standardised  
16 DALY rate of IBD at the global level.  
17

### 18 19 **Supplementary Tables**

20  
21 Supplementary Table 1: Prevalent cases, deaths and disability adjusted life years  
22 (DALYs) of inflammatory bower disease (IBD) in 1990 and 2019 and their  
23 percentage change from 1990 to 2019  
24

25  
26 Supplementary Table 2: Prevalent cases, deaths and disability adjusted life years  
27 (DALYs) for inflammatory bower disease (IBD) by 204 countries or territories in  
28 2019 and 2019, and their percentage change from 1990 to 2019.  
29

30  
31 Supplementary Table 3: Age-standardised prevalence, death and DALY rates for  
32 inflammatory bower disease (IBD) by 204 countries or territories in 1990 and 2019,  
33 and their temporal trends from 1990 to 2019.  
34

35  
36 Supplementary Table 4: Incident cases, YLLs and YLDs of inflammatory bower  
37 disease (IBD) in 1990 and 2019 and their percentage change from 1990 to 2019.  
38

39  
40 Supplementary Table 5: Age-standardised incidence, YLL and YLD rates for  
41 inflammatory bower disease (IBD) in 1990 and 2019 and their temporal trends from  
42 1990 to 2019.  
43  
44  
45  
46  
47  
48  
49  
50  
51  
52  
53  
54  
55  
56  
57  
58  
59  
60

**Supplementary Figure 1.** Trends from 1990 to 2019 in number and age-standardised prevalence rate of IBD at the global level.



Error bars indicate the 95% uncertainty interval (UI) for number of prevalent cases. Shading indicates the 95% UI for the age-standardised prevalence rate. IBD, inflammatory bowel disease.

**Supplementary Figure 2.** The absolute number of deaths due to IBD for 204 countries and territories in 2019.



IBD, inflammatory bowel disease.



**Supplementary Figure 3.** The age-standardised death rate (per 100 000 population) of IBD for 204 countries and territories in 2019.



IBD, inflammatory bowel disease.

**Supplementary Figure 4.** The EAPC of age-standardised death rate for IBD in 204 countries and territories between 1990 and 2019.



EAPC, estimated annual percentage change; IBD, inflammatory bowel disease.

**Supplementary Figure 5.** Trends from 1990 to 2019 in number and age-standardised death rate of IBD at the global level.



Error bars indicate the 95% uncertainty interval (UI) for number of death cases. Shading indicates the 95% UI for the age-standardised death rate. IBD, inflammatory bowel disease.

**Supplementary Figure 6.** The absolute number of DALYs due to IBD for 204 countries and territories in 2019.



DALYs, disability adjusted life years; IBD, inflammatory bowel disease.

1  
2  
3 **Supplementary Figure 7.** The absolute number of incident cases due to IBD for 204  
4 countries and territories in 2019.  
5



20 IBD, inflammatory bowel disease.

21  
22  
23 **Supplementary Figure 8.** The absolute number of YLLs due to IBD for 204  
24 countries and territories in 2019.  
25



40 IBD, inflammatory bowel disease; YLLs, years of life lost.

41  
42  
43 **Supplementary Figure 9.** The absolute number of YLDs due to IBD for 204  
44 countries and territories in 2019.  
45



IBD, inflammatory bowel disease; YLDs, years of life lived with disability.

**Supplementary Figure 10.** The age-standardised DALY rate (per 100 000 population) of IBD for 204 countries and territories in 2019.



DALY, disability adjusted life year; IBD, inflammatory bowel disease.

**Supplementary Figure 11.** The EAPC of age-standardised DALY rate for IBD in 204 countries and territories between 1990 and 2019.



DALY, disability adjusted life year; EAPC, estimated annual percentage change; IBD, inflammatory bowel disease.

**Supplementary Figure 12.** The EAPC of age-standardised incidence rate for IBD in 204 countries and territories between 1990 and 2019.



EAPC, estimated annual percentage change; IBD, inflammatory bowel disease.

**Supplementary Figure 13.** The EAPC of age-standardised YLL rate for IBD in 204 countries and territories between 1990 and 2019.



EAPC, estimated annual percentage change; IBD, inflammatory bowel disease; YLL, years of life lost.

**Supplementary Figure 14.** The EAPC of age-standardised YLD rate for IBD in 204 countries and territories between 1990 and 2019.



EAPC, estimated annual percentage change; IBD, inflammatory bowel disease; YLD, years of life lived with disability.



**Supplementary Figure 15.** Global counts and age-specific rates of YLLs and YLDs due to IBD across age group in 2019.



Error bars indicate the 95% uncertainty interval (UI) for YLLs and YLDs. Shading indicates the 95% UI for the rates. IBD, inflammatory bowel disease; YLDs, years of life lived with disability; YLLs, years of life lost.

**Supplementary Figure 16.** Trends from 1990 to 2019 in number and age-standardised DALY rate of IBD at the global level.

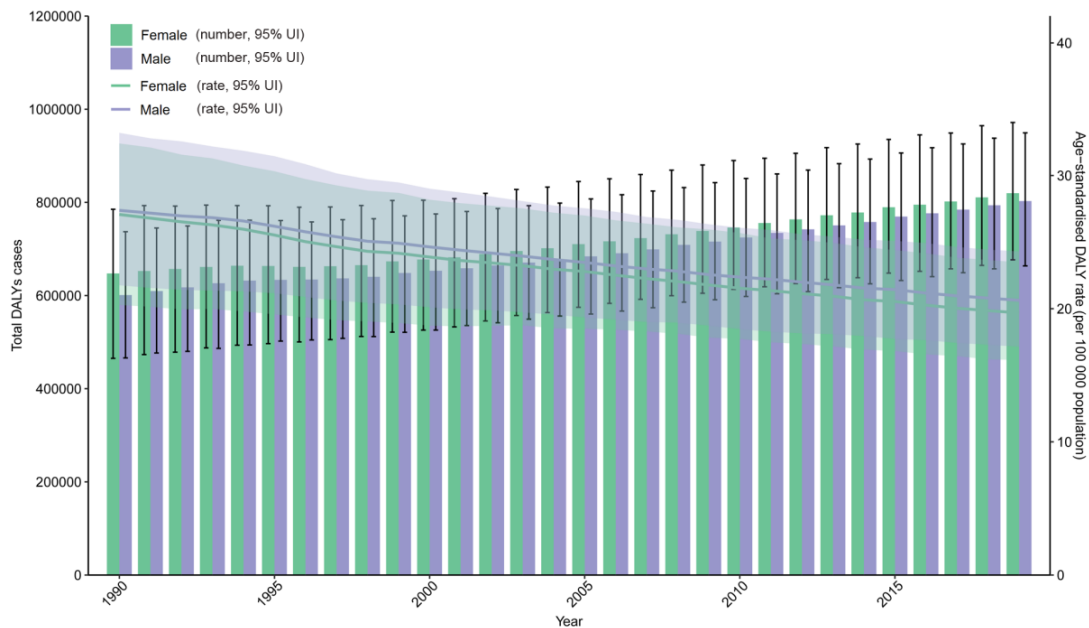

Error bars indicate the 95% uncertainty interval (UI) for number of DALYs cases. Shading indicates the 95% UI for the age-standardised DALY rate. DALY, disability adjusted life year; IBD, inflammatory bowel disease.

**Supplementary Table 1** Prevalent cases, deaths and disability adjusted life years (DALYs) of inflammatory bowel disease (IBD) in 1990 and 2019 and their percentage change from 1990 to 2019

| Characteristics         | Prevalent cases                       |                                    |                                     | Deaths                       |                              |                                     | DALYs                             |                                    |                                     |
|-------------------------|---------------------------------------|------------------------------------|-------------------------------------|------------------------------|------------------------------|-------------------------------------|-----------------------------------|------------------------------------|-------------------------------------|
|                         | 1990 No.<br>(95%UI)                   | 2019 No.<br>(95%UI)                | Percentage<br>change (%)<br>(95%UI) | 1990 No.<br>(95%UI)          | 2019 No.<br>(95%UI)          | Percentage<br>change (%)<br>(95%UI) | 1990 No.<br>(95%UI)               | 2019 No.<br>(95%UI)                | Percentage<br>change (%)<br>(95%UI) |
| Global                  | 3322132<br>(2903627<br>to<br>3790430) | 4898558<br>(4353233 to<br>5499296) | 47.45 (43.76<br>to 51.43)           | 24295<br>(20258 to<br>28376) | 40998<br>(34933 to<br>44661) | 68.75 (47.12<br>to 94.62)           | 1248275<br>(963014 to<br>1503174) | 1622498<br>(1356296 to<br>1915042) | 29.98 (14.83<br>to 50.21)           |
| Sex                     |                                       |                                    |                                     |                              |                              |                                     |                                   |                                    |                                     |
| Male                    | 1584462<br>(1374414<br>to<br>1814399) | 2411840<br>(2136219 to<br>2724369) | 52.22 (48.47<br>to 56.34)           | 11347 (9002<br>to 14218)     | 18633<br>(15060 to<br>20938) | 64.21 (37.52<br>to 90.74)           | 600963<br>(466033 to<br>736983)   | 802748<br>(663563 to<br>949342)    | 33.58 (15.75<br>to 53.92)           |
| Female                  | 1737670<br>(1523309<br>to<br>1974864) | 2486718<br>(2216240 to<br>2775262) | 43.11 (39.03<br>to 47.31)           | 12947<br>(9953 to<br>14888)  | 22365<br>(18759 to<br>24838) | 72.74 (47.65<br>to 115.99)          | 647311<br>(465166 to<br>785221)   | 819751<br>(676700 to<br>971584)    | 26.64 (10.70<br>to 54.99)           |
| SDI quintile            |                                       |                                    |                                     |                              |                              |                                     |                                   |                                    |                                     |
| High                    | 1883348<br>(1654416<br>to<br>2128434) | 2283717<br>(2079286 to<br>2493360) | 21.26 (15.68<br>to 27.38)           | 7386 (6656<br>to 8731)       | 17801<br>(14215 to<br>19552) | 141.02<br>(73.28 to<br>161.46)      | 415485<br>(323781 to<br>520634)   | 603330<br>(489511 to<br>729627)    | 45.21 (26.78<br>to 56.21)           |
| High-middle             | 942961<br>(817123 to<br>1086707)      | 1362491<br>(1206918 to<br>1538822) | 44.49 (40.70<br>to 48.74)           | 5045 (4476<br>to 5782)       | 7272 (6519<br>to 8110)       | 44.13 (24.31<br>to 65.11)           | 288336<br>(236216 to<br>344578)   | 352794<br>(285252 to<br>432623)    | 22.36 (12.11<br>to 32.44)           |
| Middle                  | 301457<br>(252149 to<br>355140)       | 818871<br>(688348 to<br>968484)    | 171.64<br>(163.13 to<br>181.21)     | 5425 (4146<br>to 6768)       | 6598 (5602<br>to 7341)       | 21.61 (-2.11<br>to 58.92)           | 248139<br>(184995 to<br>297495)   | 291088<br>(240412 to<br>345833)    | 17.31 (-3.67<br>to 60.14)           |
| Low-middle              | 152118<br>(124851 to<br>184061)       | 335789<br>(278324 to<br>403122)    | 120.74<br>(115.27 to<br>126.61)     | 4533 (3018<br>to 6152)       | 6180 (4994<br>to 7392)       | 36.34 (9.54<br>to 81.14)            | 203020<br>(126472 to<br>268417)   | 236584<br>(189248 to<br>283804)    | 16.53 (-9.40<br>to 65.68)           |
| Low                     | 41264<br>(33866 to<br>50406)          | 95941<br>(78454 to<br>116802)      | 132.51<br>(127.59 to<br>136.94)     | 1893 (1144<br>to 2626)       | 3125 (2442<br>to 4016)       | 65.06 (21.70<br>to 141.90)          | 92718<br>(45634 to<br>147570)     | 137867<br>(100264 to<br>180825)    | 48.69 (1.39<br>to 148.81)           |
| GBD region              |                                       |                                    |                                     |                              |                              |                                     |                                   |                                    |                                     |
| Andean Latin<br>America | 4294 (3643<br>to 5026)                | 10380<br>(8875 to<br>12027)        | 141.73<br>(131.47 to<br>153.82)     | 168 (99 to<br>249)           | 144 (111 to<br>182)          | -14.37<br>(-45.71 to<br>56.11)      | 10768<br>(5527 to<br>17349)       | 5942 (4666<br>to 7395)             | -44.82<br>(-67.80 to<br>12.24)      |
| Australasia             | 24135<br>(20445 to<br>28083)          | 53225<br>(47167 to<br>59881)       | 120.53<br>(104.13 to<br>137.71)     | 117 (103 to<br>139)          | 400 (291 to<br>465)          | 241.68<br>(120.09 to<br>298.29)     | 5802 (4531<br>to 7299)            | 13328<br>(10488 to<br>16560)       | 129.69<br>(92.95 to<br>151.94)      |



|    |                              |                           |                           |                           |                     |                     |                         |                      |                      |                          |
|----|------------------------------|---------------------------|---------------------------|---------------------------|---------------------|---------------------|-------------------------|----------------------|----------------------|--------------------------|
| 1  |                              |                           |                           |                           |                     |                     |                         |                      |                      |                          |
| 2  |                              |                           |                           |                           |                     |                     |                         |                      |                      |                          |
| 3  |                              |                           |                           |                           |                     |                     |                         |                      |                      |                          |
| 4  |                              | 13360                     |                           |                           |                     |                     |                         |                      |                      | 19.44                    |
| 5  | Caribbean                    | 8194 (7012 to 9634)       | (11262 to 15892)          | 63.04 (55.79 to 71.54)    | 157 (118 to 208)    | 210 (156 to 264)    | 33.66 (3.39 to 70.80)   | 7451 (5008 to 11792) | 8900 (6523 to 11709) | (-16.93 to 53.06)        |
| 6  |                              | 42100                     | 72034                     |                           |                     |                     |                         | 15952                | 20237                |                          |
| 7  |                              |                           |                           |                           |                     |                     |                         |                      |                      |                          |
| 8  | Central Asia                 | (35493 to 49944)          | (60489 to 86073)          | 71.10 (65.37 to 77.74)    | 215 (167 to 251)    | 249 (218 to 288)    | 15.70 (-1.33 to 47.63)  | (12800 to 19230)     | (16357 to 24806)     | 26.86 (10.10 to 46.33)   |
| 9  |                              | 290304                    | 236196                    | -18.64                    |                     |                     |                         | 61546                | 54694                | -11.13                   |
| 10 |                              |                           |                           |                           |                     |                     |                         |                      |                      |                          |
| 11 | Central Europe               | (249715 to 338920)        | (214732 to 259804)        | (-24.57 to -11.98)        | 604 (563 to 696)    | 958 (799 to 1104)   | 58.66 (24.18 to 83.87)  | (47417 to 77414)     | (42729 to 67570)     | (-18.70 to -3.30)        |
| 12 |                              | 40471                     | 81606                     | 101.64                    |                     |                     |                         | 183.85               | 18096                | 36178                    |
| 13 | Central Latin America        | (34451 to 47294)          | (69904 to 95542)          | (96.51 to 107.43)         | 301 (270 to 330)    | 854 (702 to 997)    | (135.53 to 232.71)      | (15456 to 20849)     | (30219 to 43014)     | 99.92 (74.40 to 127.28)  |
| 14 |                              |                           |                           |                           |                     |                     |                         |                      |                      |                          |
| 15 | Central Sub-Saharan Africa   | 2781 (2267 to 3400)       | 7015 (5690 to 8639)       | 152.29 (138.04 to 168.85) | 193 (118 to 301)    | 355 (254 to 497)    | 84.05 (16.03 to 200.18) | 9491 (4855 to 17734) | (10733 to 22385)     | 64.1 (-9.96 to 213.74)   |
| 16 |                              | 244790                    | 925074                    | 277.90                    |                     |                     |                         | 240231               | 239963               | -0.11                    |
| 17 | East Asia                    | (202981 to 291054)        | (788347 to 1085238)       | (260.33 to 300.79)        | 5734 (4169 to 7374) | 4983 (4074 to 5769) | (-36.64 to 22.31)       | (167510 to 299891)   | (187123 to 299808)   | (-25.58 to 54.11)        |
| 18 |                              | 233969                    | 237672                    |                           |                     |                     |                         | 72932                | 77123                |                          |
| 19 | Eastern Europe               | (199922 to 274757)        | (203164 to 276577)        | 1.58 (-0.80 to 4.10)      | 1305 (992 to 1507)  | 1633 (1370 to 1865) | 25.06 (5.75 to 56.78)   | (57526 to 88869)     | (63287 to 94008)     | 5.75 (-4.27 to 21.34)    |
| 20 |                              |                           |                           |                           |                     |                     |                         |                      |                      |                          |
| 21 | Eastern Sub-Saharan Africa   | 7067 (5804 to 8596)       | 18830 (15395 to 22997)    | 166.43 (160.39 to 173.14) | 697 (462 to 1111)   | 1253 (923 to 1678)  | 79.64 (7.37 to 192.58)  | (16916 to 68481)     | (39435 to 74044)     | 49.18 (-19.5 to 202.23)  |
| 22 |                              | 255028                    | 459062                    |                           |                     |                     |                         | 51699                | 78601                |                          |
| 23 | High-income Asia Pacific     | (213480 to 302123)        | (403027 to 520418)        | 80.00 (65.57 to 95.92)    | 685 (439 to 789)    | 694 (556 to 912)    | 1.33 (-19.66 to 85.83)  | (38591 to 66563)     | (55261 to 105049)    | 52.04 (37.02 to 68.81)   |
| 24 |                              | 1100006                   | 920750                    | -16.30                    |                     |                     |                         | 158.55               | 209072               | 245234                   |
| 25 | High-income North America    | (961428 to 1248970)       | (859032 to 982587)        | (-22.94 to -9.05)         | 2442 (2189 to 2964) | 6314 (5076 to 6886) | (83.64 to 182.08)       | (155328 to 270983)   | (200564 to 294018)   | 17.30 (2.00 to 33.02)    |
| 26 |                              |                           |                           |                           |                     |                     |                         |                      |                      |                          |
| 27 | North Africa and Middle East | 89159 (76544 to 102596)   | 282534 (239506 to 334478) | 216.89 (196.52 to 234.98) | 592 (407 to 836)    | 1033 (866 to 1226)  | 74.43 (20.30 to 164.45) | (35438 to 46318)     | (72755 to 91112)     | 105.30 (56.49 to 171.10) |
| 28 |                              |                           |                           |                           |                     |                     |                         |                      |                      |                          |
| 29 | Oceania                      | 199 (159 to 240)          | 417 (338 to 509)          | 109.69 (96.12 to 124.69)  | 22 (14 to 31)       | 36 (26 to 51)       | 65.38 (12.06 to 142.01) | 1036 (602 to 1625)   | 1696 (1107 to 2576)  | 63.81 (3.61 to 170.09)   |
| 30 |                              |                           |                           |                           |                     |                     |                         |                      |                      |                          |
| 31 | South Asia                   | 157942 (127077 to 195839) | 335746 (272330 to 413946) | 112.58 (106.64 to 120.13) | 3864 (2533 to 5504) | 5702 (4286 to 7410) | 47.58 (16.55 to 93.31)  | (171448 to 227334)   | (221978 to 278494)   | 29.47 (1.12 to 76.01)    |
| 32 |                              | 16557                     | 48152                     | 190.83                    |                     |                     |                         | 45316                | 46686                |                          |
| 33 | Southeast Asia               | (13040 to 20323)          | (39527 to 58063)          | (174.97 to 212.05)        | 1230 (741 to 1536)  | 1498 (1139 to 1771) | 21.79 (-3.10 to 72.54)  | (30762 to 56838)     | (38847 to 55186)     | 3.02 (-20.10 to 46.45)   |
| 34 |                              |                           |                           |                           |                     |                     |                         |                      |                      |                          |
| 35 | Southern Latin America       | 9153 (7618 to 10754)      | 15243 (12896 to 17896)    | 66.53 (58.55 to 74.68)    | 139 (123 to 151)    | 236 (210 to 280)    | 69.36 (46.49 to 101.01) | 5248 (4578 to 5993)  | 7740 (6670 to 9152)  | 47.49 (32.63 to 65.73)   |
| 36 |                              |                           |                           |                           |                     |                     |                         |                      |                      |                          |
| 37 |                              |                           |                           |                           |                     |                     |                         |                      |                      |                          |
| 38 |                              |                           |                           |                           |                     |                     |                         |                      |                      |                          |
| 39 |                              |                           |                           |                           |                     |                     |                         |                      |                      |                          |
| 40 |                              |                           |                           |                           |                     |                     |                         |                      |                      |                          |
| 41 |                              |                           |                           |                           |                     |                     |                         |                      |                      |                          |
| 42 |                              |                           |                           |                           |                     |                     |                         |                      |                      |                          |
| 43 |                              |                           |                           |                           |                     |                     |                         |                      |                      |                          |
| 44 |                              |                           |                           |                           |                     |                     |                         |                      |                      |                          |
| 45 |                              |                           |                           |                           |                     |                     |                         |                      |                      |                          |
| 46 |                              |                           |                           |                           |                     |                     |                         |                      |                      |                          |
| 47 |                              |                           |                           |                           |                     |                     |                         |                      |                      |                          |
| 48 |                              |                           |                           |                           |                     |                     |                         |                      |                      |                          |
| 49 |                              |                           |                           |                           |                     |                     |                         |                      |                      |                          |
| 50 |                              |                           |                           |                           |                     |                     |                         |                      |                      |                          |
| 51 |                              |                           |                           |                           |                     |                     |                         |                      |                      |                          |
| 52 |                              |                           |                           |                           |                     |                     |                         |                      |                      |                          |
| 53 |                              |                           |                           |                           |                     |                     |                         |                      |                      |                          |
| 54 |                              |                           |                           |                           |                     |                     |                         |                      |                      |                          |
| 55 |                              |                           |                           |                           |                     |                     |                         |                      |                      |                          |
| 56 |                              |                           |                           |                           |                     |                     |                         |                      |                      |                          |
| 57 |                              |                           |                           |                           |                     |                     |                         |                      |                      |                          |
| 58 |                              |                           |                           |                           |                     |                     |                         |                      |                      |                          |
| 59 |                              |                           |                           |                           |                     |                     |                         |                      |                      |                          |
| 60 |                              |                           |                           |                           |                     |                     |                         |                      |                      |                          |

|    |                |            |            |              |             |              |              |            |            |              |
|----|----------------|------------|------------|--------------|-------------|--------------|--------------|------------|------------|--------------|
| 1  |                |            |            |              |             |              |              |            |            |              |
| 2  |                |            |            |              |             |              |              |            |            |              |
| 3  |                | 18023)     |            |              |             |              |              |            |            |              |
| 4  |                |            |            |              |             |              |              |            |            |              |
| 5  | Southern       | 3760 (3109 | 8141 (6736 | 116.54       | 138 (99 to  | 240 (198 to  | 74.44 (31.74 | 6615 (4279 | 9230 (7542 | 39.54 (-0.67 |
| 6  | Sub-Saharan    | to 4581)   | to 9864)   | (109.70 to   | 169)        | 278)         | to 161.11)   | to 9518)   | to 10926)  | to 121.74)   |
| 7  | Africa         |            |            | 124.72)      |             |              |              |            |            |              |
| 8  |                | 74856      | 117653     |              |             |              | 129.84       | 27724      | 46997      |              |
| 9  | Tropical Latin | (65373 to  | (102012 to | 57.17 (51.82 | 455 (400 to | 1047 (950    | (109.36 to   | (23589 to  | (40115 to  | 69.52 (59.16 |
| 10 | America        | 85425)     | 134397)    | to 63.44)    | 492)        | to 1217)     | 167.46)      | 32357)     | 54972)     | to 83.74)    |
| 11 |                | 707145     | 1026504    |              |             |              | 160.46       | 185733     | 310691     |              |
| 12 | Western Europe | (634121 to | (925440 to | 45.16 (41.37 | 4600 (4132  | 11981 (9244  | (66.17 to    | (149509 to | (255911 to | 67.28 (34.40 |
| 13 |                | 786986)    | 1127578)   | to 48.78)    | to 5864)    | to 13315)    | 190.17)      | 227830)    | 371106)    | to 79.72)    |
| 14 | Western        | 10222      | 28965      | 183.36       |             |              |              | 31197      | 56026      |              |
| 15 | Sub-Saharan    | (8432 to   | (23820 to  | (178.45 to   | 634 (365 to | 1178 (805 to | 85.67 (40.49 | (14381 to  | (35327 to  | 79.59 (30.21 |
| 16 | Africa         | 12421)     | 35133)     | 188.56)      | 996)        | 1610)        | to 177.24)   | 47867)     | 78051)     | to 198.66)   |

Abbreviations: GBD=Global Burden of Disease. SDI=Socio-demographic Index.  
 UI=uncertainty interval.

**Supplementary Table 2** Prevalent cases, deaths and disability adjusted life years (DALYs) for inflammatory bowel disease (IBD) by 204 countries or territories in 2019 and 2019, and their percentage change from 1990 to 2019

| Characteristics     | Prevalent cases        |                        |                                     | Deaths              |                     |                                     | DALYs               |                       |                                     |
|---------------------|------------------------|------------------------|-------------------------------------|---------------------|---------------------|-------------------------------------|---------------------|-----------------------|-------------------------------------|
|                     | 1990 No.<br>(95%UI)    | 2019 No.<br>(95%UI)    | Percentage<br>change (%)<br>(95%UI) | 1990 No.<br>(95%UI) | 2019 No.<br>(95%UI) | Percentage<br>change (%)<br>(95%UI) | 1990 No.<br>(95%UI) | 2019 No.<br>(95%UI)   | Percentage<br>change (%)<br>(95%UI) |
| Afghanistan         | 1738 (1410 to 2120)    | 5699 (4548 to 7113)    | 228.01 (200.09 to 258.61)           | 31 (14 to 55)       | 58 (31 to 89)       | 88.34 (29.82 to 190.04)             | 1237 (627 to 2377)  | 3017 (1879 to 4660)   | 143.91 (72.00 to 244.29)            |
| Albania             | 3324 (2792 to 3928)    | 3896 (3286 to 4630)    | 17.22 (7.74 to 27.7)                | 50 (21 to 65)       | 13 (9 to 19)        | -74.70 (-84.65 to -32.21)           | 3904 (1399 to 5200) | 991 (727 to 1300)     | -74.62 (-83.28 to -33.39)           |
| Algeria             | 5982 (5169 to 6928)    | 16875 (13593 to 20871) | 182.11 (149.55 to 221.44)           | 28 (18 to 44)       | 53 (38 to 70)       | 90.14 (11.64 to 209.90)             | 1826 (1320 to 2675) | 4021 (2997 to 5295)   | 120.18 (51.51 to 190.24)            |
| American Samoa      | 2 (2 to 3)             | 3 (3 to 4)             | 48.88 (37.37 to 61.93)              | 0 (0 to 1)          | 0 (0 to 0)          | -37.72 (-65.35 to 47.30)            | 15 (9 to 21)        | 8 (5 to 14)           | -47.39 (-70.61 to 25.25)            |
| Andorra             | 69 (58 to 81)          | 133 (111 to 159)       | 93.79 (79.63 to 110.16)             | 0 (0 to 0)          | 1 (1 to 2)          | 266.11 (124.63 to 467.38)           | 17 (13 to 23)       | 36 (26 to 47)         | 111.42 (66.64 to 167.41)            |
| Angola              | 460 (373 to 573)       | 1648 (1338 to 2017)    | 258.10 (233.16 to 285.26)           | 37 (17 to 76)       | 78 (52 to 117)      | 112.25 (2.89 to 349.24)             | 1913 (713 to 4719)  | 3662 (2249 to 5786)   | 91.46 (-19.81 to 397.70)            |
| Antigua and Barbuda | 17 (14 to 20)          | 34 (28 to 41)          | 102.06 (85.45 to 119.33)            | 1 (0 to 1)          | 1 (0 to 1)          | 17.47 (-15.05 to 92.04)             | 18 (13 to 20)       | 22 (18 to 28)         | 25.07 (-4.44 to 87.07)              |
| Argentina           | 4828 (3926 to 5756)    | 7825 (6413 to 9484)    | 62.10 (49.74 to 73.10)              | 84 (74 to 93)       | 143 (124 to 169)    | 71.49 (45.04 to 102.47)             | 2981 (2577 to 3433) | 4556 (3904 to 5373)   | 52.84 (34.77 to 71.30)              |
| Armenia             | 2547 (2109 to 3013)    | 3263 (2744 to 3956)    | 28.11 (18.76 to 37.72)              | 7 (5 to 9)          | 11 (8 to 13)        | 51.30 (17.69 to 101.11)             | 637 (492 to 805)    | 764 (593 to 979)      | 19.86 (4.07 to 38.21)               |
| Australia           | 18262 (15282 to 21523) | 44624 (39169 to 50438) | 144.35 (122.23 to 167.82)           | 97 (85 to 120)      | 369 (259 to 430)    | 279.18 (123.37 to 350.95)           | 4536 (3533 to 5743) | 11569 (9111 to 14334) | 155.05 (104.34 to 184.94)           |
| Austria             | 25345 (22242 to 28177) | 33080 (29600 to 37293) | 30.52 (19.87 to 42.12)              | 99 (88 to 133)      | 101 (80 to 165)     | 2.52 (-14.48 to 30.58)              | 5699 (4484 to 7140) | 6463 (4736 to 8366)   | 13.41 (1.99 to 27.18)               |
| Azerbaijan          | 4623 (3817 to 5491)    | 9463 (7886 to 11458)   | 104.71 (89.06 to 120.81)            | 12 (9 to 15)        | 13 (10 to 18)       | 12.27 (-26.26 to 63.36)             | 1080 (815 to 1410)  | 1829 (1289 to 2470)   | 69.47 (44.70 to 98.86)              |
| Bahamas             | 65 (55 to 77)          | 123 (102 to 152)       | 88.60 (70.75 to 107.18)             | 1 (1 to 1)          | 2 (1 to 2)          | 82.56 (39.32 to 142.99)             | 49 (41 to 57)       | 78 (63 to 98)         | 60.27 (27.44 to 102.98)             |
| Bahrain             | 179 (152 to 212)       | 846 (688 to 1004)      | 373.26 (300.00 to 446.52)           | 0 (0 to 1)          | 1 (1 to 2)          | 178.61 (100.00 to 257.22)           | 44 (32 to 56)       | 167 (116 to 218)      | 283.01 (180.00 to 386.02)           |

|    |                |             |              |               |              |              |              |              |              |              |
|----|----------------|-------------|--------------|---------------|--------------|--------------|--------------|--------------|--------------|--------------|
| 1  |                |             |              |               |              |              |              |              |              |              |
| 2  |                |             |              |               |              |              |              |              |              |              |
| 3  |                | 206)        | 1035)        | (309.51 to    |              | (82.33 to    | 57)          | 229)         | (204.71 to   |              |
| 4  |                |             |              | 442.36)       |              | 326.1)       |              |              | 374.48)      |              |
| 5  |                |             |              |               |              |              |              |              |              |              |
| 6  |                |             | 33018        | 180.14        | 544 (333 to  | 713 (431 to  | 30.90        | 23781        | 26354        | 10.82        |
| 7  | Bangladesh     | 11786 (9494 | (26285 to    | (157.01 to    | 805)         | 1068)        | (-18.82 to   | (13440 to    | (17363 to    | (-35.76 to   |
| 8  |                | to 14655)   | 41258)       | 203.31)       |              |              | 117.77)      | 35324)       | 37248)       | 104.55)      |
| 9  |                |             |              |               |              |              |              |              |              |              |
| 10 | Barbados       | 183 (153 to | 282 (238 to  | 54.27 (41.76  | 1 (1 to 1)   | 2 (1 to 2)   | 48.15 (12.33 | 58 (47 to    | 81 (62 to    | 39.17 (18.58 |
| 11 |                | 218)        | 340)         | to 69.09)     |              |              | to 96.63)    | 71)          | 101)         | to 61.35)    |
| 12 |                |             |              |               |              |              |              |              |              |              |
| 13 | Belarus        | 9910 (8453  | 11335 (9509  | 14.38 (6.51   | 45 (32 to    | 58 (42 to    | 29.88 (-8.49 | 2690 (2011   | 3063 (2364   | 13.87 (-6.13 |
| 14 |                | to 11723)   | to 13529)    | to 23.58)     | 60)          | 77)          | to 97.40)    | to 3484)     | to 3923)     | to 41.64)    |
| 15 |                |             | 20093        | 107.97        | 113 (99 to   | 273 (206 to  | 141.39       | 3307 (2755   | 6370 (5236   | 92.63 (55.31 |
| 16 | Belgium        | 9661 (8871  | (17518 to    | (87.58 to     | 134)         | 319)         | (64.63 to    | to 3921)     | to 7678)     | to 116.01)   |
| 17 |                | to 10430)   | 22821)       | 131.05)       |              |              | 188.06)      |              |              |              |
| 18 |                |             |              | 230.96        |              |              | 117.53       |              |              |              |
| 19 |                |             |              |               |              |              |              |              |              |              |
| 20 | Belize         | 26 (22 to   | 87 (71 to    | (204.21 to    | 1 (1 to 1)   | 2 (1 to 2)   | (55.55 to    | 40 (29 to    | 77 (64 to    | 91.51 (43.10 |
| 21 |                | 32)         | 106)         | 258.71)       |              |              | 286.06)      | 50)          | 97)          | to 212.80)   |
| 22 |                |             |              |               |              |              |              |              |              |              |
| 23 |                |             |              | 227.98        |              |              | 116.13       |              |              | 107.25       |
| 24 | Benin          | 209 (171 to | 685 (549 to  | (203.9 to     | 14 (6 to 24) | 30 (18 to    | (28.68 to    | 694 (232 to  | 1437 (773 to | (11.24 to    |
| 25 |                | 253)        | 838)         | 255.4)        |              | 44)          | 334.23)      | 1320)        | 2281)        | 374.73)      |
| 26 |                |             |              |               |              |              |              |              |              |              |
| 27 |                |             |              |               |              |              | -15.72       |              |              | -22.33       |
| 28 | Bermuda        | 23 (19 to   | 33 (27 to    | 42.79 (30.81  | 1 (0 to 1)   | 0 (0 to 1)   | (-38.69 to   | 18 (14 to    | 14 (11 to    | (-40.21 to   |
| 29 |                | 28)         | 39)          | to 55.62)     |              |              | 37.20)       | 21)          | 18)          | 11.58)       |
| 30 |                |             |              |               |              |              |              |              |              |              |
| 31 |                |             |              | 140.27        |              |              |              |              |              | 18.91        |
| 32 | Bhutan         | 66 (52 to   | 158 (128 to  | (120.87 to    | 2 (1 to 4)   | 3 (2 to 7)   | 57.00 (-6.75 | 86 (38 to    | 102 (67 to   | (-35.13 to   |
| 33 |                | 83)         | 197)         | 162.46)       |              |              | to 195.84)   | 160)         | 202)         | 133.49)      |
| 34 |                |             |              |               |              |              |              |              |              |              |
| 35 | Bolivia        |             |              | 145.90        |              |              | 39.57        |              |              | -13.09       |
| 36 | (Plurinational | 569 (473 to | 1400 (1171   | (129.42 to    | 25 (10 to    | 34 (26 to    | (-28.99 to   | 1552 (546 to | 1348 (986 to | (-59.56 to   |
| 37 | State of)      | 694)        | to 1693)     | 165.45)       | 48)          | 45)          | 217.03)      | 3375)        | 1772)        | 134.61)      |
| 38 |                |             |              |               |              |              |              |              |              |              |
| 39 | Bosnia and     | 4910 (4225  | 5387 (4726   | 9.73 (1.15 to | 18 (12 to    | 26 (13 to    | 40.25        | 1285 (987 to | 1372 (949 to | 6.80 (-13.90 |
| 40 | Herzegovina    | to 5717)    | to 6247)     | 17.87)        | 23)          | 35)          | (-11.49 to   | 1644)        | 1778)        | to 28.67)    |
| 41 |                |             |              |               |              |              | 108.03)      |              |              |              |
| 42 |                |             |              | 214.79        |              |              | 104.82       |              |              | 106.67       |
| 43 | Botswana       | 70 (58 to   | 221 (179 to  | (189.25 to    | 4 (3 to 6)   | 9 (6 to 13)  | (14.62 to    | 188 (121 to  | 388 (241 to  | (18.10 to    |
| 44 |                | 86)         | 276)         | 244.24)       |              |              | 221.73)      | 269)         | 620)         | 226.68)      |
| 45 |                |             |              |               |              |              |              |              |              |              |
| 46 |                | 73860       | 115697       |               |              |              | 129.44       | 27396        | 46350        |              |
| 47 | Brazil         | (64511 to   | (100339 to   | 56.64 (51.18  | 451 (396 to  | 1035 (939 to | (108.60 to   | (23325 to    | (39647 to    | 69.18 (58.65 |
| 48 |                | 84264)      | 132222)      | to 62.94)     | 488)         | 1207)        | 167.01)      | 31992)       | 54190)       | to 83.50)    |
| 49 |                |             |              |               |              |              |              |              |              |              |
| 50 |                |             |              | 134.79        |              |              | 127.20       |              |              |              |
| 51 | Brunei         | 126 (100 to | 295 (237 to  | (114.54 to    | 1 (1 to 2)   | 3 (2 to 3)   | (58.12 to    | 57 (40 to    | 114 (89 to   | 99.44 (53.62 |
| 52 | Darussalam     | 155)        | 361)         | 156.55)       |              |              | 237.13)      | 85)          | 147)         | to 164.86)   |
| 53 |                |             |              |               |              |              |              |              |              |              |
| 54 |                | 13507       |              | -16.53        |              |              |              |              |              | -7.55        |
| 55 | Bulgaria       | (11443 to   | 11275 (9602  | (-23.08 to    | 25 (22 to    | 41 (32 to    | 65.55 (22.25 | 2779 (2081   | 2569 (1937   | (-19.78 to   |
| 56 |                | 15898)      | to 13477)    | -9.27)        | 32)          | 51)          | to 118.70)   | to 3597)     | to 3319)     | 6.98)        |
| 57 |                |             |              |               |              |              |              |              |              |              |
| 58 | Burkina Faso   | 392 (318 to | 1098 (901 to | 180.10        | 35 (16 to    | 81 (41 to    | 130.36       | 1781 (607 to | 3942 (1729   | 121.28       |
| 59 |                | 485)        | 1347)        | (158.26 to    | 58)          | 129)         | (25.65 to    | 3594)        | to 7006)     | (15.32 to    |
| 60 |                |             |              |               |              |              |              |              |              |              |

|    |                 |             |             |              |              |              |              |              |              |              |
|----|-----------------|-------------|-------------|--------------|--------------|--------------|--------------|--------------|--------------|--------------|
| 1  |                 |             |             |              |              |              |              |              |              |              |
| 2  |                 |             |             |              |              |              |              |              |              |              |
| 3  |                 |             |             |              |              |              |              |              |              |              |
| 4  |                 |             |             | 200.27)      |              |              | 350.02)      |              |              | 380.59)      |
| 5  |                 |             |             | 121.41       |              |              |              |              |              | 51.13        |
| 6  | Burundi         | 207 (169 to | 459 (369 to | (105.47 to   | 21 (13 to    | 38 (24 to    | 76.44 (-8.52 | 1064 (461 to | 1608 (1001   | (-33.49 to   |
| 7  |                 | 255)        | 561)        | 137.36)      | 37)          | 58)          | to 253.21)   | 2387)        | to 2527)     | 272.32)      |
| 8  |                 |             |             |              |              |              |              |              |              |              |
| 9  |                 |             |             | 176.77       |              |              | 37.26        |              |              | 28.23        |
| 10 | Cabo Verde      | 23 (19 to   | 63 (51 to   | (156.29 to   | 1 (0 to 1)   | 1 (1 to 1)   | (-16.62 to   | 34 (21 to    | 43 (35 to    | (-15.29 to   |
| 11 |                 | 28)         | 78)         | 198.45)      |              |              | 131.63)      | 47)          | 54)          | 118.40)      |
| 12 |                 |             |             |              |              |              |              |              |              |              |
| 13 |                 |             |             | 172.54       |              |              | 46.42 (-4.73 | 1175 (547 to | 1222 (890 to | 3.97 (-44.25 |
| 14 | Cambodia        | 218 (168 to | 595 (467 to | (148.48 to   | 26 (14 to    | 38 (26 to    | to 167.94)   | 2166)        | 1546)        | to 128.29)   |
| 15 |                 | 273)        | 730)        | 197.52)      | 39)          | 48)          |              |              |              |              |
| 16 |                 |             |             |              |              |              |              |              |              |              |
| 17 |                 |             |             | 259.93       |              |              | 95.05 (-1.81 | 1367 (583 to | 2830 (1520   | 107.06       |
| 18 | Cameroon        | 538 (438 to | 1938 (1576  | (232.74 to   | 30 (14 to    | 58 (30 to    | to 218.33)   | 2134)        | to 4639)     | (11.41 to    |
| 19 |                 | 666)        | to 2393)    | 288.04)      | 46)          | 95)          |              |              |              | 245.01)      |
| 20 |                 |             |             |              |              |              |              |              |              |              |
| 21 |                 | 116922      | 157737      | 34.91 (23.15 | 270 (241 to  | 403 (323 to  | 49.15 (24.68 | 22694        | 29915        | 31.82 (19.21 |
| 22 | Canada          | (112352 to  | (142113 to  | to 47.18)    | 302)         | 605)         | to 106.93)   | (17260 to    | (21904 to    | to 46.22)    |
| 23 |                 | 121655)     | 173888)     |              |              |              |              | 29101)       | 38441)       |              |
| 24 |                 |             |             |              |              |              |              |              |              |              |
| 25 | Central African | 116 (95 to  | 243 (199 to | (91.54 to    | 12 (7 to 19) | 21 (12 to    | 80.23 (18.71 | 510 (273 to  | 890 (475 to  | 74.48 (9.24  |
| 26 | Republic        | 145)        | 299)        | 126.84)      |              | 35)          | to 166.11)   | 935)         | 1568)        | to 167.75)   |
| 27 |                 |             |             |              |              |              |              |              |              |              |
| 28 |                 |             |             | 184.44       |              |              | 108.90       |              |              | 117.09       |
| 29 | Chad            | 251 (205 to | 713 (580 to | (162.13 to   | 21 (10 to    | 44 (25 to    | (42.17 to    | 960 (360 to  | 2084 (1020   | (31.20 to    |
| 30 |                 | 306)        | 881)        | 208.28)      | 35)          | 64)          | 222.10)      | 1689)        | to 3460)     | 260.72)      |
| 31 |                 |             |             |              |              |              |              |              |              |              |
| 32 |                 |             |             | 80.06 (68.43 | 46 (36 to    | 70 (59 to    | 53.60 (25.60 | 1928 (1573   | 2612 (2169   | 35.45 (14.76 |
| 33 | Chile           | 3739 (3165  | 6732 (5813  | to 93.27)    | 51)          | 89)          | to 123.36)   | to 2244)     | to 3169)     | to 72.90)    |
| 34 |                 | to 4369)    | to 7788)    |              |              |              |              |              |              |              |
| 35 |                 | 239473      | 911045      | 280.44       |              |              | -15.89       | 234245       | 232464       | -0.76        |
| 36 | China           | (198363 to  | (776347 to  | (262.77 to   | 5560 (4048   | 4676 (3774   | (-39.57 to   | (162916 to   | (179903 to   | (-26.71 to   |
| 37 |                 | 285024)     | 1069533)    | 303.34)      | to 7203)     | to 5461)     | 19.52)       | 293663)      | 291090)      | 54.23)       |
| 38 |                 |             |             |              |              |              |              |              |              |              |
| 39 |                 |             | 15348       | 127.99       |              |              | 175.73       |              |              |              |
| 40 | Colombia        | 6732 (5626  | (13025 to   | (113.25 to   | 56 (48 to    | 154 (116 to  | (106.78 to   | 3215 (2689   | 6419 (4991   | 99.66 (64.35 |
| 41 |                 | to 7997)    | 18234)      | 144.58)      | 61)          | 202)         | 258.47)      | to 3798)     | to 7986)     | to 143.95)   |
| 42 |                 |             |             |              |              |              |              |              |              |              |
| 43 |                 |             |             | 123.01       |              |              | 81.66 (13.33 | 77 (29 to    | 119 (75 to   | 54.58        |
| 44 | Comoros         | 21 (17 to   | 48 (39 to   | (106.31 to   | 2 (1 to 3)   | 4 (2 to 6)   | to 277.77)   | 137)         | 174)         | (-16.19 to   |
| 45 |                 | 26)         | 60)         | 142.32)      |              |              |              |              |              | 298.98)      |
| 46 |                 |             |             |              |              |              |              |              |              |              |
| 47 |                 |             |             | 189.59       |              |              | 87.61 (15.68 | 396 (237 to  | 681 (463 to  | 72.21 (-4.05 |
| 48 | Congo           | 145 (120 to | 421 (343 to | (170.45 to   | 9 (6 to 14)  | 17 (12 to    | to 196.61)   | 645)         | 980)         | to 195.14)   |
| 49 |                 | 178)        | 518)        | 215.68)      |              | 25)          |              |              |              |              |
| 50 |                 |             |             |              |              |              |              |              |              |              |
| 51 |                 |             |             | 28.57 (18.27 |              |              | -14.75       |              |              | -33.66       |
| 52 | Cook Islands    | 1 (1 to 1)  | 1 (1 to 2)  | to 40.87)    | 0 (0 to 0)   | 0 (0 to 0)   | (-42.49 to   | 8 (5 to 11)  | 5 (3 to 7)   | (-57.85 to   |
| 53 |                 |             |             |              |              |              | 32.51)       |              |              | 4.48)        |
| 54 |                 |             |             |              |              |              |              |              |              |              |
| 55 |                 |             |             | 144.55       |              |              | 270.81       |              |              |              |
| 56 | Costa Rica      | 670 (560 to | 1637 (1380  | (127.55 to   | 3 (2 to 3)   | 10 (7 to 13) | (169.90 to   | 190 (150 to  | 524 (399 to  | 176.16 (128  |
| 57 |                 | 796)        | to 1937)    | 162.48)      |              |              | 398.49)      | 238)         | 669)         | to 235.84)   |
| 58 |                 |             |             |              |              |              |              |              |              |              |
| 59 | Côte d'Ivoire   | 578 (465 to | 1562 (1251  | 170.18       | 25 (11 to    | 54 (32 to    | 111.95       | 1324 (535 to | 2583 (1501   | 95.11 (14.75 |
| 60 |                 | 714)        | to 1950)    | (151.08 to   | 42)          | 79)          | (32.09 to    | 2260)        | to 3952)     | to 276.09)   |

|    |                 |             |             |              |              |             |              |             |              |              |
|----|-----------------|-------------|-------------|--------------|--------------|-------------|--------------|-------------|--------------|--------------|
| 1  |                 |             |             |              |              |             |              |             |              |              |
| 2  |                 |             |             |              |              |             |              |             |              |              |
| 3  |                 |             |             | 190.01)      |              |             | 290.61)      |             |              |              |
| 4  |                 |             |             |              |              |             | 106.49       |             |              |              |
| 5  |                 | 9449 (8823  | 10780 (9980 | 14.09 (9.79  | 16 (14 to    | 33 (25 to   | 1866 (1411   | 2288 (1717  | 22.61 (2.99  |              |
| 6  | Croatia         | to 10129)   | to 11592)   | to 18.67)    | 24)          | 42)         | (18.11 to    | to 2410)    | to 2898)     | to 39.06)    |
| 7  |                 |             |             |              |              |             | 180.74)      |             |              |              |
| 8  |                 |             |             |              |              |             | 16.33        |             |              |              |
| 9  |                 | 3240 (2702  | 4574 (3750  | 41.18 (29.72 | 36 (23 to    | 42 (33 to   | 1518 (1151   | 1682 (1335  | 10.76 (-8.18 |              |
| 10 | Cuba            | to 3901)    | to 5525)    | to 54.70)    | 43)          | 53)         | (-11.71 to   | to 1818)    | to 2085)     | to 38.33)    |
| 11 |                 |             |             |              |              |             | 79.06)       |             |              |              |
| 12 |                 |             |             | 179.86       |              |             |              |             |              |              |
| 13 |                 | 344 (292 to | 962 (870 to | (151.26 to   | 12 (7 to 16) | 16 (12 to   | 35.72 (-8.18 | 257 (180 to | 370 (303 to  | 43.92 (7.35  |
| 14 | Cyprus          | 400)        | 1050)       | 216.30)      |              | 20)         | to 121.22)   | 333)        | 444)         | to 105.55)   |
| 15 |                 |             |             |              |              |             |              |             |              |              |
| 16 |                 |             | 20802       | 103.57       |              |             |              |             |              |              |
| 17 |                 | 10218 (8616 | (19084 to   | (74.68 to    | 71 (64 to    | 114 (87 to  | 59.45 (13.25 | 3246 (2697  | 5259 (4127   | 62.01 (34.95 |
| 18 | Czechia         | to 12269)   | 22519)      | 138.01)      | 82)          | 141)        | to 100.62)   | to 3932)    | to 6597)     | to 90.03)    |
| 19 |                 |             |             |              |              |             |              |             |              |              |
| 20 | Democratic      |             |             |              |              |             |              |             |              |              |
| 21 | People's        | 3097 (2554  | 4965 (4120  | 60.33 (48.19 | 74 (41 to    | 108 (75 to  | 45.76 (-9.28 | 3363 (1697  | 3161 (2323   | -5.99        |
| 22 | Republic of     | to 3714)    | to 5978)    | to 72.89)    | 114)         | 147)        | to 166.1)    | to 6033)    | to 4117)     | (-46.37 to   |
| 23 | Korea           |             |             |              |              |             |              |             |              | 81.39)       |
| 24 |                 |             |             |              |              |             |              |             |              |              |
| 25 | Democratic      |             |             | 125.06       |              |             |              |             |              | 55.18        |
| 26 | Republic of the | 1975 (1605  | 4445 (3597  | (107.08 to   | 130 (79 to   | 231 (159 to | 77.23 (4.65  | 6456 (3284  | 10018 (6738  | (-21.39 to   |
| 27 | Congo           | to 2418)    | to 5502)    | 145.69)      | 207)         | 336)        | to 194.58)   | to 12595)   | to 15367)    | 209.02)      |
| 28 |                 |             |             |              |              |             |              |             |              |              |
| 29 |                 | 13729       | 15310       | 11.51 (5.37  | 43 (38 to    | 70 (60 to   | 65.35 (42.63 | 2893 (2227  | 3391 (2644   | 17.21 (8.04  |
| 30 | Denmark         | (12468 to   | (13920 to   | to 17.43)    | 50)          | 83)         | to 92.58)    | to 3654)    | to 4239)     | to 27.16)    |
| 31 |                 | 15154)      | 16882)      |              |              |             |              |             |              |              |
| 32 |                 |             |             | 342.41       |              |             |              |             |              | 138.93       |
| 33 |                 | 20 (16 to   | 90 (72 to   | (307.26 to   | 1 (1 to 2)   | 3 (2 to 5)  | 190.20       | 60 (27 to   | 144 (88 to   | 138.93       |
| 34 | Djibouti        | 25)         | 111)        | 378.51)      |              |             | (72.46 to    | 121)        | 236)         | (25.91 to    |
| 35 |                 |             |             |              |              |             | 408.23)      |             |              | 367.14)      |
| 36 |                 |             |             |              |              |             |              |             |              |              |
| 37 |                 |             |             |              |              |             | -9.08        |             |              | -11.16       |
| 38 | Dominica        | 19 (16 to   | 22 (18 to   | 17.43 (7.09  | 1 (1 to 1)   | 1 (0 to 1)  | (-35.39 to   | 23 (19 to   | 21 (16 to    | (-34.54 to   |
| 39 |                 | 23)         | 27)         | to 28.52)    |              |             | 27.05)       | 28)         | 27)          | 19.86)       |
| 40 |                 |             |             |              |              |             |              |             |              |              |
| 41 |                 |             |             | 103.40       |              |             |              |             |              |              |
| 42 | Dominican       | 1239 (1022  | 2521 (2070  | (87.28 to    | 11 (9 to 16) | 22 (16 to   | 99.41 (29.65 | 732 (527 to | 1109 (821 to | 51.44 (0.42  |
| 43 | Republic        | to 1507)    | to 3084)    | 121.86)      |              | 30)         | to 202.38)   | 1060)       | 1450)        | to 118.17)   |
| 44 |                 |             |             |              |              |             |              |             |              |              |
| 45 |                 |             |             | 186.04       |              |             |              |             |              |              |
| 46 | Ecuador         | 1159 (1021  | 3315 (2981  | (172.00 to   | 16 (12 to    | 34 (24 to   | 107.95       | 982 (705 to | 1475 (1120   | 50.25 (3.59  |
| 47 |                 | to 1302)    | to 3667)    | 200.27)      | 21)          | 44)         | (37.86 to    | 1302)       | to 1823)     | to 124.68)   |
| 48 |                 |             |             |              |              |             | 223.02)      |             |              |              |
| 49 |                 | 17107       | 39271       | 129.56       |              |             |              |             |              | 109.10       |
| 50 | Egypt           | (14592 to   | (31782 to   | (97.49 to    | 59 (35 to    | 119 (70 to  | 100.85 (5.49 | 4521 (3160  | 9453 (6709   | (57.59 to    |
| 51 |                 | 19726)      | 48388)      | 159.21)      | 119)         | 186)        | to 238.69)   | to 6354)    | to 12613)    | 171.14)      |
| 52 |                 |             |             |              |              |             |              |             |              |              |
| 53 |                 |             |             |              |              |             | -28.67       |             |              | -33.83       |
| 54 | El Salvador     | 842 (701 to | 1478 (1239  | 75.42 (62.88 | 13 (8 to 16) | 9 (7 to 12) | (-54.13 to   | 661 (461 to | 437 (329 to  | (-55.24 to   |
| 55 |                 | 998)        | to 1741)    | to 87.97)    |              |             | 18.21)       | 881)        | 574)         | -1.58)       |
| 56 |                 |             |             |              |              |             |              |             |              |              |
| 57 | Equatorial      | 19 (16 to   | 95 (79 to   | 397.19       |              |             |              |             |              | 63.28        |
| 58 | Guinea          | 24)         | 117)        | (353.40 to   | 2 (1 to 3)   | 3 (2 to 4)  | 66.29 (-6.86 | 73 (37 to   | 119 (73 to   | (-22.44 to   |
| 59 |                 |             |             | 443.01)      |              |             | to 195.01)   | 135)        | 184)         | 233.97)      |
| 60 |                 |             |             |              |              |             |              |             |              |              |

|    |           |             |             |              |              |             |              |              |              |              |
|----|-----------|-------------|-------------|--------------|--------------|-------------|--------------|--------------|--------------|--------------|
| 1  |           |             |             |              |              |             |              |              |              |              |
| 2  |           |             |             |              |              |             |              |              |              |              |
| 3  |           |             | 186.49      |              |              | 165.47      |              |              | 114.61       |              |
| 4  | Eritrea   | 114 (93 to  | 327 (263 to | (164.83 to   | 9 (4 to 17)  | 23 (15 to   | (22.99 to    | 474 (168 to  | 1017 (645 to | (-12.62 to   |
| 5  |           | 141)        | 398)        | 210.17)      |              | 34)         | 516.12)      | 1107)        | 1643)        | 493.09)      |
| 6  |           |             |             |              |              |             |              |              |              |              |
| 7  |           |             |             |              |              |             | -17.88       |              |              | -12.32       |
| 8  | Estonia   | 1311 (1148  | 1821 (1593  | 38.90 (26.62 | 10 (9 to 12) | 9 (6 to 11) | (-40.41 to   | 511 (425 to  | 448 (341 to  | (-28.71 to   |
| 9  |           | to 1494)    | to 2066)    | to 51.17)    |              |             | 15.88)       | 601)         | 573)         | 9.89)        |
| 10 |           |             |             |              |              |             |              |              |              |              |
| 11 |           |             |             | 109.48       |              |             |              |              |              | 44.21        |
| 12 | Eswatini  | 38 (31 to   | 80 (65 to   | (95.32 to    | 2 (1 to 3)   | 4 (2 to 5)  | 72.30 (1.22  | 106 (47 to   | 153 (101 to  | (-27.03 to   |
| 13 |           | 47)         | 98)         | 125.52)      |              |             | to 254.21)   | 206)         | 227)         | 242.69)      |
| 14 |           |             |             |              |              |             |              |              |              |              |
| 15 |           |             |             | 152.76       |              |             | 48.24        |              |              | 13.90        |
| 16 | Ethiopia  | 1763 (1447  | 4457 (3634  | (143.58 to   | 219 (128 to  | 325 (197 to | (-33.27 to   | 11296 (4911  | 12866 (8426  | (-51.97 to   |
| 17 |           | to 2135)    | to 5454)    | 162.31)      | 398)         | 489)        | 200.06)      | to 25054)    | to 19913)    | 197.17)      |
| 18 |           |             |             |              |              |             |              |              |              |              |
| 19 |           |             |             |              |              |             | 27.79        |              |              | 14.67        |
| 20 | Fiji      | 28 (23 to   | 42 (35 to   | 50.29 (36.12 | 1 (1 to 2)   | 2 (1 to 2)  | (-16.31 to   | 59 (45 to    | 68 (49 to    | (-24.77 to   |
| 21 |           | 34)         | 52)         | to 66.63)    |              |             | 91.11)       | 80)          | 91)          | 72.54)       |
| 22 |           |             |             |              |              |             |              |              |              |              |
| 23 |           |             | 19960       | 111.22       |              |             |              |              |              |              |
| 24 | Finland   | 9450 (8777  | (17972 to   | (94.08 to    | 33 (24 to    | 39 (33 to   | 18.82 (-5.40 | 2012 (1537   | 3465 (2517   | 72.24 (51.93 |
| 25 |           | to 10150)   | 22078)      | 127.73)      | 39)          | 46)         | to 68.55)    | to 2571)     | to 4569)     | to 93.91)    |
| 26 |           |             |             |              |              |             |              |              |              |              |
| 27 |           | 60982       | 101092      | 65.77 (54.06 | 943 (807 to  | 2181 (1253  | 131.25       | 23073        | 40856        | 77.07 (34.58 |
| 28 | France    | (55563 to   | (91225 to   | to 77.24)    | 1043)        | to 2615)    | (51.63 to    | (19741 to    | (30081 to    | to 97.82)    |
| 29 |           | 66348)      | 111418)     |              |              |             | 168.76)      | 26699)       | 48291)       |              |
| 30 |           |             |             |              |              |             |              |              |              |              |
| 31 |           |             |             | 150.81       |              |             |              |              |              | 42.02        |
| 32 | Gabon     | 65 (54 to   | 163 (134 to | (132.67 to   | 4 (2 to 6)   | 5 (4 to 8)  | 52.52 (-4.74 | 144 (85 to   | 205 (137 to  | (-13.99 to   |
| 33 |           | 80)         | 201)        | 173.19)      |              |             | to 134.04)   | 223)         | 294)         | 140.73)      |
| 34 |           |             |             |              |              |             |              |              |              |              |
| 35 |           |             |             | 162.91       |              |             |              |              |              |              |
| 36 | Gambia    | 49 (39 to   | 130 (105 to | (142.17 to   | 3 (1 to 5)   | 5 (3 to 7)  | 85.18 (3.78  | 132 (63 to   | 215 (140 to  | 62.69 (-6.86 |
| 37 |           | 60)         | 161)        | 186.15)      |              |             | to 214.51)   | 243)         | 298)         | to 192.83)   |
| 38 |           |             |             |              |              |             |              |              |              |              |
| 39 |           |             |             | -17.45       |              |             |              |              |              | -18.96       |
| 40 | Georgia   | 5100 (4308  | 4210 (3545  | (-22.85 to   | 16 (10 to    | 17 (10 to   | 3.41 (-22.82 | 1222 (911 to | 991 (741 to  | (-30.33 to   |
| 41 |           | to 6037)    | to 5060)    | -11.71)      | 22)          | 22)         | to 40.33)    | 1581)        | 1269)        | -5.81)       |
| 42 |           |             |             |              |              |             |              |              |              |              |
| 43 |           | 101153      | 236048      | 133.36       | 1201 (987 to | 4286 (3156  | 256.72       | 37493        | 92002        | 145.38       |
| 44 | Germany   | (87240 to   | (208508 to  | (115.87 to   | 2011)        | to 4903)    | (63.30 to    | (30500 to    | (74718 to    | (51.12 to    |
| 45 |           | 117946)     | 266966)     | 150.36)      |              |             | 351.66)      | 51704)       | 107721)      | 187.04)      |
| 46 |           |             |             |              |              |             |              |              |              |              |
| 47 |           |             |             | 194.61       |              |             |              |              |              |              |
| 48 | Ghana     | 982 (800 to | 2894 (2355  | (176.45 to   | 56 (24 to    | 103 (57 to  | 84.24 (5.66  | 2633 (1097   | 4506 (2554   | 71.16 (2.12  |
| 49 |           | 1189)       | to 3533)    | 216.26)      | 95)          | 155)        | to 242.87)   | to 4201)     | to 6654)     | to 227.26)   |
| 50 |           |             |             |              |              |             |              |              |              |              |
| 51 |           | 12180       | 10403 (9422 | -14.59       |              |             |              |              |              |              |
| 52 | Greece    | (10236 to   | to 11537)   | (-23.98 to   | 35 (30 to    | 66 (54 to   | 86.77 (51.57 | 2407 (1790   | 2424 (1911   | 0.69 (-13.02 |
| 53 |           | 14240)      |             | -3.38)       | 40)          | 80)         | to 131.14)   | to 3170)     | to 3027)     | to 15.85)    |
| 54 |           |             |             |              |              |             |              |              |              |              |
| 55 | Greenland | 78 (64 to   | 108 (92 to  | 39.24 (25.78 | 0 (0 to 0)   | 0 (0 to 1)  | 147.84       | 17 (13 to    | 25 (19 to    | 49.12 (13.65 |
| 56 |           | 92)         | 125)        | to 55.52)    |              |             | (18.45 to    | 23)          | 33)          | to 82.39)    |
| 57 |           |             |             |              |              |             |              |              |              |              |
| 58 |           |             |             |              |              |             |              |              |              |              |
| 59 | Grenada   | 16 (13 to   | 28 (23 to   | 76.27 (60.87 | 1 (1 to 1)   | 1 (1 to 2)  | 29.20 (-4.73 | 33 (27 to    | 43 (36 to    | 30.86 (1.58  |
| 60 |           | 19)         | 35)         | to 93.49)    |              |             | to 79.53)    | 39)          | 52)          | to 68.87)    |



|    |                            |                           |                           |                           |                     |                     |                          |                          |                           |                          |
|----|----------------------------|---------------------------|---------------------------|---------------------------|---------------------|---------------------|--------------------------|--------------------------|---------------------------|--------------------------|
| 1  |                            |                           |                           |                           |                     |                     | 21.60                    |                          |                           |                          |
| 2  |                            |                           |                           |                           |                     |                     |                          |                          |                           |                          |
| 3  |                            |                           |                           |                           |                     |                     |                          |                          |                           |                          |
| 4  |                            |                           |                           |                           |                     |                     |                          |                          |                           |                          |
| 5  | Guam                       | 8 (6 to 9)                | 12 (10 to 14)             | 49.19 (36.21 to 64.35)    | 0 (0 to 0)          | 0 (0 to 0)          | (-20.17 to 84.57)        | 9 (7 to 12)              | 9 (7 to 13)               | 2.91 (-31.52 to 53.3)    |
| 6  |                            |                           |                           |                           |                     |                     |                          |                          |                           |                          |
| 7  |                            |                           |                           |                           |                     |                     |                          |                          |                           |                          |
| 8  |                            |                           |                           |                           |                     |                     |                          |                          |                           |                          |
| 9  | Guatemala                  | 1041 (867 to 1243)        | 3192 (2680 to 3791)       | 206.76 (185.26 to 227.66) | 13 (8 to 22)        | 35 (27 to 45)       | 180.16 (34.43 to 377.94) | 866 (522 to 1506)        | 1761 (1381 to 2210)       | 103.35 (6.31 to 246.71)  |
| 10 |                            |                           |                           |                           |                     |                     |                          |                          |                           |                          |
| 11 |                            |                           |                           |                           |                     |                     |                          |                          |                           |                          |
| 12 | Guinea                     | 309 (251 to 384)          | 677 (543 to 826)          | 119.23 (103.12 to 138.21) | 19 (6 to 34)        | 29 (14 to 46)       | 49.62 (-7.31 to 159.78)  | 1008 (272 to 2032)       | 1414 (609 to 2445)        | 40.38 (-20.12 to 170.29) |
| 13 |                            |                           |                           |                           |                     |                     |                          |                          |                           |                          |
| 14 |                            |                           |                           |                           |                     |                     |                          |                          |                           |                          |
| 15 |                            |                           |                           |                           |                     |                     |                          |                          |                           |                          |
| 16 | Guinea-Bissau              | 44 (36 to 54)             | 103 (83 to 126)           | 134.63 (116.21 to 153.25) | 4 (2 to 7)          | 6 (3 to 8)          | 39.91 (-18.84 to 175.43) | 201 (66 to 403)          | 265 (152 to 392)          | 31.85 (-30.36 to 186.15) |
| 17 |                            |                           |                           |                           |                     |                     |                          |                          |                           |                          |
| 18 |                            |                           |                           |                           |                     |                     |                          |                          |                           |                          |
| 19 |                            |                           |                           |                           |                     |                     |                          |                          |                           |                          |
| 20 | Guyana                     | 126 (103 to 152)          | 170 (139 to 210)          | 35.00 (24.45 to 45.80)    | 5 (4 to 6)          | 6 (5 to 9)          | 20.04 (-18.42 to 74.53)  | 239 (189 to 291)         | 257 (191 to 336)          | 7.22 (-25.07 to 53.03)   |
| 21 |                            |                           |                           |                           |                     |                     |                          |                          |                           |                          |
| 22 |                            |                           |                           |                           |                     |                     |                          |                          |                           |                          |
| 23 |                            |                           |                           |                           |                     |                     |                          |                          |                           |                          |
| 24 | Haiti                      | 860 (708 to 1057)         | 1916 (1570 to 2384)       | 122.68 (105.23 to 142.3)  | 58 (24 to 105)      | 85 (45 to 125)      | 45.78 (-11 to 148.4)     | 3030 (946 to 6879)       | 3782 (1875 to 6104)       | 24.85 (-33.53 to 156.75) |
| 25 |                            |                           |                           |                           |                     |                     |                          |                          |                           |                          |
| 26 |                            |                           |                           |                           |                     |                     |                          |                          |                           |                          |
| 27 |                            |                           |                           |                           |                     |                     |                          |                          |                           |                          |
| 28 | Honduras                   | 619 (513 to 734)          | 1803 (1499 to 2141)       | 191.20 (171.74 to 211.20) | 22 (14 to 31)       | 50 (31 to 69)       | 128.99 (47.94 to 251.69) | 1240 (712 to 1929)       | 1816 (1191 to 2508)       | 46.37 (-11.95 to 139.27) |
| 29 |                            |                           |                           |                           |                     |                     |                          |                          |                           |                          |
| 30 |                            |                           |                           |                           |                     |                     |                          |                          |                           |                          |
| 31 |                            |                           |                           |                           |                     |                     |                          |                          |                           |                          |
| 32 | Hungary                    | 24215 (21977 to 26809)    | 42233 (39099 to 45377)    | 74.41 (64.26 to 86.04)    | 84 (76 to 109)      | 100 (80 to 128)     | 19.27 (-4.55 to 45.83)   | 5849 (4647 to 7201)      | 8339 (6257 to 10544)      | 42.56 (25.99 to 56.19)   |
| 33 |                            |                           |                           |                           |                     |                     |                          |                          |                           |                          |
| 34 |                            |                           |                           |                           |                     |                     |                          |                          |                           |                          |
| 35 |                            |                           |                           |                           |                     |                     |                          |                          |                           |                          |
| 36 | Iceland                    | 357 (301 to 420)          | 872 (752 to 1007)         | 144.33 (123.25 to 167.58) | 2 (2 to 2)          | 4 (3 to 5)          | 107.81 (52.43 to 151.5)  | 90 (71 to 113)           | 187 (142 to 239)          | 107.79 (81.26 to 131.98) |
| 37 |                            |                           |                           |                           |                     |                     |                          |                          |                           |                          |
| 38 |                            |                           |                           |                           |                     |                     |                          |                          |                           |                          |
| 39 | India                      | 133927 (107800 to 166434) | 270719 (219873 to 332264) | 102.14 (95.94 to 110.29)  | 2770 (1783 to 3802) | 4214 (2950 to 5531) | 52.13 (19.29 to 98.65)   | 127568 (77798 to 169843) | 164416 (117527 to 208276) | 28.89 (1.40 to 72.21)    |
| 40 |                            |                           |                           |                           |                     |                     |                          |                          |                           |                          |
| 41 |                            |                           |                           |                           |                     |                     |                          |                          |                           |                          |
| 42 |                            |                           |                           |                           |                     |                     |                          |                          |                           |                          |
| 43 | Indonesia                  | 5025 (3974 to 6141)       | 11410 (9158 to 13704)     | 127.09 (115.15 to 141.04) | 704 (401 to 910)    | 913 (582 to 1179)   | 29.58 (2.63 to 76.95)    | 26026 (16965 to 34445)   | 24943 (18268 to 32252)    | -4.16 (-31.91 to 42.06)  |
| 44 |                            |                           |                           |                           |                     |                     |                          |                          |                           |                          |
| 45 |                            |                           |                           |                           |                     |                     |                          |                          |                           |                          |
| 46 | Iran (Islamic Republic of) | 14964 (12153 to 18513)    | 40493 (32952 to 49751)    | 170.60 (160.28 to 181.00) | 51 (33 to 68)       | 132 (55 to 164)     | 158.02 (43.67 to 247.65) | 4022 (3121 to 5103)      | 9481 (6679 to 12439)      | 135.71 (84.19 to 177.03) |
| 47 |                            |                           |                           |                           |                     |                     |                          |                          |                           |                          |
| 48 |                            |                           |                           |                           |                     |                     |                          |                          |                           |                          |
| 49 |                            |                           |                           |                           |                     |                     |                          |                          |                           |                          |
| 50 |                            |                           |                           |                           |                     |                     |                          |                          |                           |                          |
| 51 | Iraq                       | 2270 (1890 to 2694)       | 10029 (8221 to 12199)     | 341.76 (303.6 to 377.49)  | 34 (21 to 51)       | 51 (38 to 67)       | 52.37 (-14.19 to 162.33) | 2135 (1267 to 3447)      | 3719 (2808 to 4931)       | 74.13 (2.20 to 190.75)   |
| 52 |                            |                           |                           |                           |                     |                     |                          |                          |                           |                          |
| 53 |                            |                           |                           |                           |                     |                     |                          |                          |                           |                          |
| 54 | Ireland                    | 3253 (2736 to 3869)       | 5762 (4988 to 6655)       | 77.13 (58.69 to 97.43)    | 33 (29 to 37)       | 51 (41 to 65)       | 53.61 (25.28 to 93.62)   | 1106 (922 to 1332)       | 1623 (1294 to 2033)       | 46.76 (29.96 to 67.57)   |
| 55 |                            |                           |                           |                           |                     |                     |                          |                          |                           |                          |
| 56 |                            |                           |                           |                           |                     |                     |                          |                          |                           |                          |
| 57 | Israel                     | 3274 (2767 to 3882)       | 6640 (5924 to 7451)       | 102.78 (76.8 to 132.02)   | 22 (18 to 24)       | 46 (38 to 63)       | 111.01 (70.80 to 199.17) | 1000 (812 to 1229)       | 1851 (1484 to 2306)       | 85.14 (61.05 to 116.46)  |
| 58 |                            |                           |                           |                           |                     |                     |                          |                          |                           |                          |
| 59 |                            |                           |                           |                           |                     |                     |                          |                          |                           |                          |
| 60 |                            |                           |                           |                           |                     |                     |                          |                          |                           |                          |

|    |              |             |             |              |              |              |              |              |              |              |
|----|--------------|-------------|-------------|--------------|--------------|--------------|--------------|--------------|--------------|--------------|
| 1  |              |             |             |              |              |              |              |              |              |              |
| 2  |              |             |             |              |              |              |              |              |              |              |
| 3  |              | 183929      | 186447      |              |              |              | 272.23       | 33890        | 44427        |              |
| 4  | Italy        | (159353 to  | (165268 to  | 1.37 (-2.84  | 351 (310 to  | 1305 (944 to | (70.52 to    | (24913 to    | (34629 to    | 31.09 (5.26  |
| 5  |              | 209220)     | 209019)     | to 6.10)     | 581)         | 1468)        | 339.63)      | 43884)       | 54814)       | to 46.90)    |
| 6  |              |             |             |              |              |              |              |              |              |              |
| 7  |              |             |             |              |              |              | 21.88        |              |              | 12.67        |
| 8  | Jamaica      | 543 (455 to | 884 (737 to | 62.81 (49.97 | 6 (4 to 7)   | 7 (5 to 10)  | (-16.58 to   | 304 (231 to  | 343 (264 to  | (-13.90 to   |
| 9  |              | 648)        | 1059)       | to 76.46)    |              |              | 110.45)      | 367)         | 432)         | 66.78)       |
| 10 |              |             |             |              |              |              |              |              |              |              |
| 11 |              | 236120      | 408632      |              |              |              |              | 41769        | 67424        |              |
| 12 | Japan        | (196281 to  | (353858 to  | 73.06 (59.11 | 367 (270 to  | 452 (350 to  | 23.32 (1.39  | (30062 to    | (46877 to    | 61.42 (48.32 |
| 13 |              | 281825)     | 468152)     | to 88.73)    | 394)         | 629)         | to 112.57)   | 56026)       | 91495)       | to 75.54)    |
| 14 |              |             |             |              |              |              |              |              |              |              |
| 15 |              |             |             | 614.12       |              |              | 135.70       |              |              | 376.81       |
| 16 | Jordan       | 1611 (1394  | 11508 (9646 | (540.91 to   | 6 (4 to 8)   | 13 (10 to    | (49.91 to    | 452 (339 to  | 2155 (1536   | (274.79 to   |
| 17 |              | to 1851)    | to 13565)   | 683.77)      |              | 17)          | 281.75)      | 570)         | to 2953)     | 495.45)      |
| 18 |              |             |             |              |              |              |              |              |              |              |
| 19 |              |             | 15823       |              |              |              |              |              |              |              |
| 20 | Kazakhstan   | 11689 (9797 | (13219 to   | 35.36 (26.10 | 76 (56 to    | 82 (66 to    | 7.52 (-17.29 | 4458 (3567   | 5172 (4164   | 16.03 (-1.28 |
| 21 |              | to 14063)   | 18930)      | to 46.10)    | 95)          | 100)         | to 48.48)    | to 5515)     | to 6466)     | to 37.13)    |
| 22 |              |             |             |              |              |              |              |              |              |              |
| 23 |              |             |             | 230.72       |              |              | 144.03       |              |              |              |
| 24 | Kenya        | 868 (711 to | 2870 (2364  | (219.85 to   | 74 (46 to    | 180 (111 to  | (82.74 to    | 3011 (1930   | 6453 (4376   | 114.3 (40.66 |
| 25 |              | 1056)       | to 3474)    | 242.5)       | 125)         | 265)         | 228.15)      | to 4593)     | to 9370)     | to 213.60)   |
| 26 |              |             |             |              |              |              |              |              |              |              |
| 27 | Kiribati     | 2 (2 to 3)  | 4 (3 to 4)  | 60.33 (46.38 | 1 (0 to 1)   | 1 (0 to 1)   | 5.25 (-33.24 | 28 (11 to    | 30 (14 to    | 4.10 (-35.53 |
| 28 |              |             |             | to 76.77)    |              |              | to 73.45)    | 58)          | 55)          | to 92.08)    |
| 29 |              |             |             |              |              |              |              |              |              |              |
| 30 |              |             |             | 230.91       |              |              | 195.71       |              |              | 197.49       |
| 31 | Kuwait       | 863 (798 to | 2857 (2338  | (174.37 to   | 1 (1 to 2)   | 4 (3 to 5)   | (125.48 to   | 188 (140 to  | 558 (391 to  | (143.44 to   |
| 32 |              | 937)        | to 3483)    | 298.63)      |              |              | 314.39)      | 241)         | 755)         | 262.68)      |
| 33 |              |             |             |              |              |              |              |              |              |              |
| 34 |              |             |             |              |              |              | -36.11       |              |              | -7.05        |
| 35 | Kyrgyzstan   | 2526 (2126  | 4283 (3592  | 69.58 (59.46 | 15 (10 to    | 10 (8 to 12) | (-51.26 to   | 1109 (784 to | 1031 (789 to | (-27.91 to   |
| 36 |              | to 3008)    | to 5083)    | to 81.49)    | 19)          |              | 14.99)       | 1376)        | 1325)        | 29.99)       |
| 37 |              |             |             |              |              |              |              |              |              |              |
| 38 | Lao People's | 90 (70 to   | 241 (191 to | 167.27       |              |              | 8.81 (-34.31 | 385 (177 to  | 387 (234 to  | 0.50 (-45.77 |
| 39 | Democratic   | 113)        | 300)        | (144.93 to   | 10 (5 to 15) | 11 (6 to 17) | to 91.32)    | 639)         | 610)         | to 106.92)   |
| 40 | Republic     |             |             | 193.03)      |              |              |              |              |              |              |
| 41 |              |             |             |              |              |              |              |              |              |              |
| 42 | Latvia       | 3273 (2810  | 3226 (2843  | -1.44 (-8.09 | 12 (10 to    | 14 (11 to    | 18.35 (-5.77 | 811 (632 to  | 779 (605 to  | -4.01        |
| 43 |              | to 3770)    | to 3623)    | to 5.70)     | 14)          | 17)          | to 47.79)    | 1017)        | 981)         | (-15.43 to   |
| 44 |              |             |             |              |              |              |              |              |              | 8.10)        |
| 45 |              |             |             | 182.89       |              |              | 146.92       |              |              | 148.06       |
| 46 | Lebanon      | 881 (721 to | 2494 (2037  | (160.10 to   | 3 (2 to 4)   | 8 (4 to 12)  | (25.25 to    | 220 (161 to  | 545 (394 to  | (90.21 to    |
| 47 |              | 1091)       | to 3050)    | 205.97)      |              |              | 359.10)      | 297)         | 737)         | 219.00)      |
| 48 |              |             |             |              |              |              |              |              |              |              |
| 49 |              |             |             |              |              |              | 51.75        |              |              | 46.51        |
| 50 | Lesotho      | 95 (78 to   | 150 (122 to | 58.00 (46.76 | 6 (4 to 8)   | 9 (6 to 12)  | (-12.69 to   | 222 (137 to  | 326 (210 to  | (-15.14 to   |
| 51 |              | 115)        | 185)        | to 69.06)    |              |              | 142.65)      | 323)         | 480)         | 129.83)      |
| 52 |              |             |             |              |              |              |              |              |              |              |
| 53 |              |             |             | 176.51       |              |              | 46.34        |              |              | 35.96        |
| 54 | Liberia      | 104 (85 to  | 288 (233 to | (154.41 to   | 7 (3 to 12)  | 11 (6 to 17) | (-18.23 to   | 360 (108 to  | 490 (271 to  | (-36.97 to   |
| 55 |              | 129)        | 354)        | 199.50)      |              |              | 235.23)      | 705)         | 833)         | 268.26)      |
| 56 |              |             |             |              |              |              |              |              |              |              |
| 57 |              |             |             | 203.80       |              |              | 159.15       |              |              | 160.02       |
| 58 | Libya        | 629 (514 to | 1910 (1557  | (175.90 to   | 4 (3 to 7)   | 11 (7 to 15) | (33.45 to    | 229 (166 to  | 595 (436 to  | (65.02 to    |
| 59 |              | 759)        | to 2333)    | 233.83)      |              |              | 345.08)      | 324)         | 782)         | 262.55)      |
| 60 |              |             |             |              |              |              |              |              |              |              |

|    |                                  |                        |                        |                           |                  |                  |                           |                      |                        |                          |
|----|----------------------------------|------------------------|------------------------|---------------------------|------------------|------------------|---------------------------|----------------------|------------------------|--------------------------|
| 1  |                                  |                        |                        |                           |                  |                  |                           |                      |                        |                          |
| 2  |                                  |                        |                        |                           |                  |                  |                           |                      |                        |                          |
| 3  |                                  |                        |                        |                           |                  |                  |                           |                      |                        |                          |
| 4  | Lithuania                        | 4535 (3980 to 5145)    | 4848 (4481 to 5210)    | 6.90 (-3.51 to 20.95)     | 14 (10 to 16)    | 18 (14 to 23)    | 26.29 (-2.24 to 67.72)    | 1054 (817 to 1321)   | 1105 (861 to 1375)     | 4.77 (-8.66 to 20.85)    |
| 5  |                                  |                        |                        |                           |                  |                  | 124.41                    |                      |                        |                          |
| 6  |                                  |                        |                        |                           |                  |                  |                           |                      |                        |                          |
| 7  | Luxembourg                       | 775 (680 to 879)       | 1503 (1318 to 1707)    | 93.98 (81.65 to 107.23)   | 5 (4 to 6)       | 11 (8 to 13)     | (55.78 to 172.33)         | 202 (162 to 247)     | 376 (297 to 471)       | 85.81 (59.15 to 105.40)  |
| 8  |                                  |                        |                        |                           |                  |                  |                           |                      |                        |                          |
| 9  |                                  |                        |                        |                           |                  |                  |                           |                      |                        |                          |
| 10 |                                  |                        |                        |                           |                  |                  |                           |                      |                        | 60.01                    |
| 11 | Madagascar                       | 490 (401 to 604)       | 1330 (1089 to 1651)    | 171.16 (153.22 to 190.88) | 36 (17 to 60)    | 69 (48 to 103)   | 92.10 (5.72 to 331.04)    | 1875 (646 to 3722)   | 3000 (2035 to 4374)    | (-23.07 to 329.63)       |
| 12 |                                  |                        |                        |                           |                  |                  |                           |                      |                        |                          |
| 13 |                                  |                        |                        |                           |                  |                  |                           |                      |                        |                          |
| 14 |                                  |                        |                        |                           |                  |                  |                           |                      |                        |                          |
| 15 | Malawi                           | 336 (273 to 415)       | 741 (603 to 910)       | 120.33 (105.3 to 136.64)  | 39 (19 to 76)    | 55 (38 to 78)    | 39.48 (-33.91 to 218.89)  | 2236 (716 to 5491)   | 2323 (1541 to 3545)    | 3.89 (-57.34 to 225.03)  |
| 16 |                                  |                        |                        |                           |                  |                  |                           |                      |                        |                          |
| 17 |                                  |                        |                        |                           |                  |                  |                           |                      |                        |                          |
| 18 |                                  |                        |                        |                           |                  |                  |                           |                      |                        |                          |
| 19 | Malaysia                         | 638 (533 to 747)       | 2165 (1879 to 2498)    | 239.19 (213.74 to 272.55) | 16 (13 to 20)    | 41 (30 to 56)    | 157.56 (64.69 to 265.74)  | 612 (503 to 742)     | 1434 (1090 to 1814)    | 134.26 (68.55 to 208.48) |
| 20 |                                  |                        |                        |                           |                  |                  |                           |                      |                        |                          |
| 21 |                                  |                        |                        |                           |                  |                  |                           |                      |                        |                          |
| 22 |                                  |                        |                        |                           |                  |                  |                           |                      |                        | 58.10                    |
| 23 | Maldives                         | 6 (5 to 7)             | 27 (21 to 33)          | 357.26 (319.05 to 402.53) | 0 (0 to 1)       | 1 (1 to 1)       | 97.39 (13.04 to 268.14)   | 19 (10 to 33)        | 29 (23 to 38)          | (-20.10 to 218.81)       |
| 24 |                                  |                        |                        |                           |                  |                  |                           |                      |                        |                          |
| 25 |                                  |                        |                        |                           |                  |                  |                           |                      |                        |                          |
| 26 |                                  |                        |                        |                           |                  |                  |                           |                      |                        |                          |
| 27 | Mali                             | 396 (321 to 489)       | 1033 (841 to 1256)     | 161.12 (141.84 to 182.05) | 29 (9 to 53)     | 55 (26 to 93)    | 90.14 (10.52 to 338.68)   | 1569 (384 to 3318)   | 2748 (1107 to 5138)    | 75.21 (-6.44 to 320.25)  |
| 28 |                                  |                        |                        |                           |                  |                  |                           |                      |                        |                          |
| 29 |                                  |                        |                        |                           |                  |                  |                           |                      |                        |                          |
| 30 |                                  |                        |                        |                           |                  |                  |                           |                      |                        |                          |
| 31 | Malta                            | 275 (237 to 318)       | 390 (346 to 441)       | 42.03 (32.40 to 52.30)    | 2 (2 to 2)       | 6 (5 to 7)       | 182.23 (117.73 to 248.53) | 84 (68 to 102)       | 149 (123 to 178)       | 77.16 (51.73 to 106.18)  |
| 32 |                                  |                        |                        |                           |                  |                  |                           |                      |                        |                          |
| 33 |                                  |                        |                        |                           |                  |                  |                           |                      |                        |                          |
| 34 | Marshall Islands                 | 1 (1 to 1)             | 2 (2 to 3)             | 81.58 (65.63 to 99.90)    | 0 (0 to 0)       | 0 (0 to 0)       | 14.19 (-33.41 to 79.45)   | 10 (6 to 17)         | 12 (6 to 20)           | 15.49 (-36.36 to 90.92)  |
| 35 |                                  |                        |                        |                           |                  |                  |                           |                      |                        |                          |
| 36 |                                  |                        |                        |                           |                  |                  |                           |                      |                        |                          |
| 37 |                                  |                        |                        |                           |                  |                  |                           |                      |                        |                          |
| 38 | Mauritania                       | 118 (96 to 144)        | 330 (270 to 405)       | 179.57 (158.4 to 202.27)  | 8 (4 to 11)      | 9 (6 to 13)      | 19.95 (-22.88 to 109.37)  | 322 (167 to 487)     | 376 (245 to 543)       | 16.93 (-28.24 to 120.07) |
| 39 |                                  |                        |                        |                           |                  |                  |                           |                      |                        |                          |
| 40 |                                  |                        |                        |                           |                  |                  |                           |                      |                        |                          |
| 41 |                                  |                        |                        |                           |                  |                  |                           |                      |                        |                          |
| 42 | Mauritius                        | 47 (37 to 58)          | 86 (69 to 102)         | 81.67 (65.36 to 99.25)    | 1 (1 to 1)       | 3 (3 to 4)       | 176.18 (101.94 to 258.21) | 50 (43 to 61)        | 117 (90 to 147)        | 134.12 (70.2 to 198.45)  |
| 43 |                                  |                        |                        |                           |                  |                  |                           |                      |                        |                          |
| 44 |                                  |                        |                        |                           |                  |                  |                           |                      |                        |                          |
| 45 |                                  |                        |                        |                           |                  |                  |                           |                      |                        |                          |
| 46 | Mexico                           | 25697 (21937 to 30082) | 46570 (40040 to 53889) | 81.22 (75.62 to 87.02)    | 157 (142 to 176) | 519 (408 to 622) | 229.87 (156.16 to 297.06) | 9626 (8180 to 11411) | 21132 (17386 to 25318) | 119.55 (86.73 to 154.33) |
| 47 |                                  |                        |                        |                           |                  |                  |                           |                      |                        |                          |
| 48 |                                  |                        |                        |                           |                  |                  |                           |                      |                        |                          |
| 49 | Micronesia (Federated States of) | 3 (2 to 4)             | 4 (3 to 5)             | 26.76 (16.02 to 38.96)    | 1 (0 to 1)       | 1 (0 to 1)       | -23.01 (-59.09 to 31.38)  | 28 (16 to 49)        | 20 (10 to 38)          | -27.22 (-62.97 to 22.93) |
| 50 |                                  |                        |                        |                           |                  |                  |                           |                      |                        |                          |
| 51 |                                  |                        |                        |                           |                  |                  |                           |                      |                        |                          |
| 52 |                                  |                        |                        |                           |                  |                  |                           |                      |                        |                          |
| 53 | Monaco                           | 43 (36 to 51)          | 59 (50 to 69)          | 37.31 (28.37 to 47.29)    | 0 (0 to 0)       | 0 (0 to 1)       | 37.96 (-4.38 to 94.10)    | 11 (8 to 14)         | 14 (11 to 18)          | 30.63 (10.51 to 53.62)   |
| 54 |                                  |                        |                        |                           |                  |                  |                           |                      |                        |                          |
| 55 |                                  |                        |                        |                           |                  |                  |                           |                      |                        |                          |
| 56 | Mongolia                         | 961 (801 to 1153)      | 2328 (1907 to 2810)    | 142.14 (124.80 to 161.08) | 11 (6 to 15)     | 12 (9 to 16)     | 11.41 (-26.46 to 89.38)   | 690 (380 to 1073)    | 814 (620 to 1028)      | 17.92 (-26.45 to 100.76) |
| 57 |                                  |                        |                        |                           |                  |                  |                           |                      |                        |                          |
| 58 |                                  |                        |                        |                           |                  |                  |                           |                      |                        |                          |
| 59 | Montenegro                       | 879 (744 to 1051)      | (890 to 1051)          | 19.54 (12.1 to 26.98)     | 2 (1 to 2)       | 3 (2 to 3)       | 48.81 (1.77 to 96.45)     | 191 (145 to 247)     | 221 (165 to 277)       | 15.74 (1.68 to 29.80)    |
| 60 |                                  |                        |                        |                           |                  |                  |                           |                      |                        |                          |

|    |                 |              |              |              |              |             |               |              |             |              |
|----|-----------------|--------------|--------------|--------------|--------------|-------------|---------------|--------------|-------------|--------------|
| 1  |                 |              |              |              |              |             |               |              |             |              |
| 2  |                 |              |              |              |              |             |               |              |             |              |
| 3  |                 | 1032)        | 1240)        | to 27.53)    |              | to 101.73)  | 247)          | 288)         | to 30.37)   |              |
| 4  |                 |              |              | 119.98       |              |             |               |              |             |              |
| 5  |                 | 3007 (2487   | 6614 (5488   | (105.44 to   | 31 (19 to    | 59 (41 to   | 91.82 (30.18  | 1438 (989 to | 2615 (1988  | 81.81 (30.04 |
| 6  | Morocco         | to 3582)     | to 7909)     | 135.91)      | 48)          | 77)         | to 192.53)    | 2101)        | to 3373)    | to 139.60)   |
| 7  |                 |              |              |              |              |             |               |              |             |              |
| 8  |                 |              |              | 128.31       |              |             | 107.07        |              |             | 75.44        |
| 9  |                 | 487 (397 to  | 1111 (897 to | (112.18 to   | 52 (30 to    | 107 (71 to  | (16.28 to     | 2567 (1058   | 4503 (2907  | (-18.50 to   |
| 10 | Mozambique      | 601)         | 1347)        | 146.62)      | 88)          | 154)        | 270.37)       | to 5668)     | to 7196)    | 319.21)      |
| 11 |                 |              |              |              |              |             |               |              |             |              |
| 12 |                 |              |              | 101.31       |              |             | -0.68         |              |             | -19.94       |
| 13 |                 | 1024 (797 to | 2062 (1656   | (83.73 to    | 60 (34 to    | 59 (44 to   | (-40.07 to    | 2820 (1386   | 2258 (1680  | (-57.94 to   |
| 14 | Myanmar         | 1272)        | to 2558)     | 120.83)      | 95)          | 82)         | 64.77)        | to 5128)     | to 3215)    | 48.65)       |
| 15 |                 |              |              |              |              |             |               |              |             |              |
| 16 |                 |              |              | 148.34       |              |             | 61.81 (0.64   | 218 (129 to  | 333 (223 to | 52.64        |
| 17 |                 | 87 (72 to    | 217 (175 to  | (130.13 to   | 6 (4 to 8)   | 9 (6 to 13) | to 190.79)    | 344)         | 498)        | (-12.57 to   |
| 18 | Namibia         | 108)         | 268)         | 167.81)      |              |             |               |              |             | 213.41)      |
| 19 |                 |              |              |              |              |             |               |              |             |              |
| 20 |                 |              |              | 12.57 (3.45  |              |             | -34.79        |              |             | -34.16       |
| 21 |                 | 0 (0 to 0)   | 0 (0 to 0)   | to 21.62)    | 0 (0 to 0)   | 0 (0 to 0)  | (-63.12 to    | 3 (1 to 6)   | 2 (1 to 4)  | (-60.95 to   |
| 22 | Nauru           |              |              |              |              |             | 6.11)         |              |             | 18.41)       |
| 23 |                 |              |              |              |              |             |               |              |             |              |
| 24 |                 |              |              | 131.04       |              |             | 23.09         |              |             |              |
| 25 |                 | 2180 (1726   | 5036 (4049   | (112.62 to   | 93 (56 to    | 115 (71 to  | (-15.11 to    | 3780 (2183   | 3819 (2683  | 1.05 (-34.25 |
| 26 | Nepal           | to 2758)     | to 6194)     | 151.30)      | 165)         | 190)        | 93.10)        | to 5903)     | to 5781)    | to 65.01)    |
| 27 |                 |              |              |              |              |             |               |              |             |              |
| 28 |                 | 24401        | 16251        | -33.4        |              |             | 180.66        |              | 12100       |              |
| 29 |                 | (22175 to    | (13975 to    | (-41.14 to   | 278 (240 to  | 782 (582 to | (78.32 to     | 8234 (6818   | (10246 to   | 46.95 (10.86 |
| 30 | Netherlands     | 26704)       | 18987)       | -24.18)      | 344)         | 906)        | 230.31)       | to 9979)     | 13731)      | to 70.21)    |
| 31 |                 |              |              |              |              |             |               |              |             |              |
| 32 |                 | 5873 (5089   | 8600 (7850   | 46.45 (37.95 | 20 (17 to    | 31 (26 to   | 58.14 (32.29  | 1267 (976 to | 1758 (1327  | 38.84 (26.73 |
| 33 | New Zealand     | to 6670)     | to 9491)     | to 57.06)    | 22)          | 39)         | to 109.75)    | 1592)        | to 2254)    | to 54.82)    |
| 34 |                 |              |              |              |              |             |               |              |             |              |
| 35 |                 | 500 (414 to  | 1453 (1218   | 190.37       |              |             | 177.21        |              |             | 137.59       |
| 36 | Nicaragua       | 598)         | to 1720)     | (167.53 to   | 3 (2 to 3)   | 7 (6 to 9)  | (99.51 to     | 187 (149 to  | 444 (340 to | (85.21 to    |
| 37 |                 |              |              | 212.17)      |              |             | 267.74)       | 245)         | 555)        | 192.36)      |
| 38 |                 |              |              |              |              |             |               |              |             |              |
| 39 |                 | 321 (256 to  | 942 (760 to  | 193.63       |              |             | 106.00        |              |             |              |
| 40 | Niger           | 395)         | 1154)        | (171.22 to   | 27 (9 to 54) | 55 (26 to   | (18.53 to     | 1564 (379 to | 2835 (1120  | 81.21 (-7.73 |
| 41 |                 |              |              | 216.83)      |              | 95)         | 313.02)       | 3724)        | to 5521)    | to 318.21)   |
| 42 |                 |              |              |              |              |             |               |              |             |              |
| 43 |                 | 5162 (4259   | 14578        | 182.41       |              |             | 78.53 (23.85  | 15139 (7194  | 26794       | 76.98 (13.30 |
| 44 | Nigeria         | to 6269)     | (11955 to    | (176.97 to   | 314 (165 to  | 560 (306 to | to 168.11)    | to 24017)    | (15017 to   | to 185.01)   |
| 45 |                 |              | 17708)       | 187.98)      | 514)         | 909)        |               |              | 42474)      |              |
| 46 |                 |              |              |              |              |             |               |              |             |              |
| 47 |                 |              |              | -12.86       |              |             | -42.22        |              |             | -45.91       |
| 48 |                 | 0 (0 to 0)   | 0 (0 to 0)   | (-20.01 to   | 0 (0 to 0)   | 0 (0 to 0)  | (-65.13 to    | 1 (0 to 1)   | 0 (0 to 1)  | (-68.37 to   |
| 49 | Niue            |              |              | -3.97)       |              |             | -10.86)       |              |             | -8.78)       |
| 50 |                 |              |              |              |              |             |               |              |             |              |
| 51 |                 | 2473 (2098   | 3374 (2855   | 36.41 (27.51 |              |             | 37.22 (1.2 to | 490 (358 to  | 635 (459 to | 29.55 (14.26 |
| 52 | North Macedonia | to 2927)     | to 3973)     | to 46.86)    | 4 (3 to 4)   | 5 (3 to 6)  | 83.42)        | 648)         | 844)        | to 46.45)    |
| 53 | Northern        |              |              |              |              |             |               |              |             |              |
| 54 | Mariana         | 3 (2 to 3)   | 3 (3 to 4)   | 17.67 (3.72  | 0 (0 to 0)   | 0 (0 to 0)  | (-70.47 to    | 12 (8 to 19) | 5 (4 to 9)  | (-77.38 to   |
| 55 | Islands         |              |              | to 33.96)    |              |             | 26.41)        |              |             | -4.80)       |
| 56 |                 |              |              |              |              |             |               |              |             |              |
| 57 |                 | 20686        | 33097        | 60.00 (50.85 | 29 (26 to    | 38 (32 to   | 30.65 (17.07  | 3551 (2585   | 5414 (3835  | 52.44 (44.12 |
| 58 | Norway          | (17395 to    | (28492 to    | to 68.77)    | 41)          | 55)         | to 54.59)     | to 4687)     | to 7244)    | to 61.59)    |
| 59 |                 | 24323)       | 37859)       |              |              |             |               |              |             |              |
| 60 |                 |              |              |              |              |             |               |              |             |              |

|    |             |             |             |              |              |              |              |              |              |              |
|----|-------------|-------------|-------------|--------------|--------------|--------------|--------------|--------------|--------------|--------------|
| 1  |             |             |             |              |              |              |              |              |              |              |
| 2  |             |             |             |              |              |              |              |              |              |              |
| 3  |             |             |             | 265.15       |              |              | 135.73       |              |              | 206.46       |
| 4  | Oman        | 431 (347 to | 1575 (1266  | (237.03 to   | 2 (1 to 3)   | 4 (3 to 5)   | (37.95 to    | 122 (85 to   | 375 (271 to  | (111.98 to   |
| 5  |             | 517)        | to 1924)    | 297.09)      |              |              | 331.56)      | 178)         | 496)         | 320.55)      |
| 6  |             |             |             |              |              |              |              |              |              |              |
| 7  |             |             | 26815       | 168.59       |              |              |              |              | 27286        |              |
| 8  | Pakistan    | 9984 (7995  | (21768 to   | (154.72 to   | 454 (240 to  | 657 (447 to  | 44.84 (-2.73 | 16234 (9791  | (18727 to    | 68.08 (19.36 |
| 9  |             | to 12369)   | 33849)      | 184.98)      | 866)         | 993)         | to 133.76)   | to 26748)    | 38379)       | to 148.68)   |
| 10 |             |             |             |              |              |              |              |              |              |              |
| 11 |             |             |             |              |              |              | 23.28        |              |              | 14.99        |
| 12 | Palau       | 1 (1 to 1)  | 1 (1 to 1)  | 58.71 (43.16 | 0 (0 to 0)   | 0 (0 to 0)   | (-26.34 to   | 3 (2 to 7)   | 4 (2 to 6)   | (-29.80 to   |
| 13 |             |             |             | to 76.15)    |              |              | 101.05)      |              |              | 103.99)      |
| 14 |             |             |             |              |              |              |              |              |              |              |
| 15 |             |             |             | 261.47       |              |              | 49.80        |              |              | 142.19       |
| 16 | Palestine   | 374 (305 to | 1351 (1104  | (229.04 to   | 3 (2 to 4)   | 4 (3 to 6)   | (-14.64 to   | 132 (92 to   | 320 (235 to  | (82.43 to    |
| 17 |             | 450)        | to 1621)    | 293.11)      |              |              |              | 127.75)      | 195)         | 443)         |
| 18 |             |             |             |              |              |              |              |              |              |              |
| 19 |             |             |             | 141.92       |              |              | 239.99       |              |              | 129.97       |
| 20 | Panama      | 553 (471 to | 1338 (1131  | (123.11 to   | 7 (6 to 10)  | 25 (19 to    | (135.70 to   | 436 (347 to  | 1002 (763 to | (65.87 to    |
| 21 |             | 638)        | to 1560)    | 161.72)      |              |              | 32)          | 373.74)      | 538)         | 1297)        |
| 22 |             |             |             |              |              |              |              |              |              |              |
| 23 |             |             |             | 145.64       |              |              |              |              |              |              |
| 24 | Papua New   | 116 (92 to  | 285 (229 to | (124.56 to   | 13 (7 to 20) | 25 (16 to    | 95.85 (20.41 | 661 (335 to  | 1258 (758 to | 90.40 (5.88  |
| 25 |             | Guinea      | 140)        | 350)         | 168.38)      |              | 38)          | to 222.69)   | 1140)        | 2034)        |
| 26 |             |             |             |              |              |              |              |              |              |              |
| 27 |             |             |             |              |              |              | 171.03       |              |              |              |
| 28 | Paraguay    | 996 (853 to | 1956 (1652  | 96.35 (82.38 | 4 (4 to 5)   | 12 (8 to 16) | (73.55 to    | 327 (263 to  | 647 (481 to  | 97.76 (55.83 |
| 29 |             | 1165)       | to 2324)    | to 111.71)   |              |              |              | 302.03)      | 404)         | 831)         |
| 30 |             |             |             |              |              |              |              |              |              |              |
| 31 |             |             |             | 120.79       |              |              | -40.28       |              |              | -62.13       |
| 32 | Peru        | 2566 (2121  | 5665 (4638  | (105.66 to   | 128 (74 to   | 76 (54 to    | (-66.32 to   | 8234 (3972   | 3118 (2308   | (-79.74 to   |
| 33 |             | to 3079)    | to 6822)    | 138.38)      | 194)         | 105)         | 19.96)       | to 13912)    | to 4194)     | -11.96)      |
| 34 |             |             |             |              |              |              |              |              |              |              |
| 35 |             |             |             | 145.40       |              |              | 19.59        |              |              |              |
| 36 | Philippines | 2067 (1630  | 5073 (4044  | (135.48 to   | 98 (54 to    | 117 (95 to   | (-15.39 to   | 3743 (2419   | 4556 (3797   | 21.71 (-7.83 |
| 37 |             | to 2519)    | to 6166)    | 156.45)      | 125)         | 155)         | 149.06)      | to 4551)     | to 5981)     | to 121.46)   |
| 38 |             |             |             |              |              |              |              |              |              |              |
| 39 |             | 177477      | 88307       | -50.24       |              |              |              | 30297        | 20081        | -33.72       |
| 40 | Poland      | (149170 to  | (77909 to   | (-54.72 to   | 180 (168 to  | 361 (281 to  | 99.98 (43.08 | (21831 to    | (15602 to    | (-41.18 to   |
| 41 |             | 211629)     | 99826)      | -45.27)      | 211)         | 426)         | to 136.68)   | 40254)       | 25064)       | -24.23)      |
| 42 |             |             |             |              |              |              |              |              |              |              |
| 43 |             |             |             |              |              |              | 277.16       |              |              | 119.87       |
| 44 | Portugal    | 6035 (5365  | 9894 (8866  | 63.94 (50.98 | 81 (72 to    | 306 (158 to  | (96.34 to    | 2425 (2073   | 5332 (3507   | (37.89 to    |
| 45 |             | to 6750)    | to 11003)   | to 79.42)    | 90)          | 363)         | 355.45)      | to 2832)     | to 6256)     | 153.53)      |
| 46 |             |             |             |              |              |              |              |              |              |              |
| 47 |             |             |             |              |              |              | -9.54        |              |              | -21.63       |
| 48 | Puerto Rico | 1123 (1058  | 1442 (1320  | 28.41 (21.63 | 20 (15 to    | 18 (13 to    | (-38.39 to   | 755 (589 to  | 592 (456 to  | (-40.46 to   |
| 49 |             | to 1194)    | to 1565)    | to 35.32)    | 22)          | 28)          | 73.14)       | 869)         | 801)         | 23.39)       |
| 50 |             |             |             |              |              |              |              |              |              |              |
| 51 | Qatar       | 154 (123 to | 1446 (1178  | 838.58       |              |              | 413.11       |              |              | 628.10       |
| 52 |             | 187)        | to 1746)    | (770.76 to   | 0 (0 to 1)   | 2 (1 to 3)   | (169.07 to   | 41 (29 to    | 296 (205 to  | (423.39 to   |
| 53 |             |             | 916.51)     |              |              | 853.64)      | 57)          | 412)         | 857.49)      |              |
| 54 |             |             |             |              |              |              |              |              |              |              |
| 55 | Republic of | 17167       | 46956       | 173.52       |              |              | -25.35       |              |              | 10.04        |
| 56 |             | Korea       | (15174 to   | (44197 to    | (147.67 to   | 313 (143 to  | 234 (183 to  | (-46.63 to   | 9498 (6903   | 10451 (7829  |
| 57 | 19498)      | 49997)      | 206.09)     | 399)         | 313)         | 58.97)       | to 11454)    | to 13343)    | 63.35)       |              |
| 58 | Republic of | 3098 (2561  | 3166 (2836  | 2.20 (-11.58 | 17 (14 to    | 18 (14 to    | 4.75 (-16.20 | 1046 (844 to | 999 (820 to  | -4.45        |
| 59 | Moldova     | to 3712)    | to 3521)    | to 19.64)    | 21)          | 21)          | to 31.59)    | 1266)        | 1209)        | (-18.23 to   |
| 60 |             |             |             |              |              |              |              |              |              |              |

|    |                 |              |             |              |              |            |              |              |              |              |
|----|-----------------|--------------|-------------|--------------|--------------|------------|--------------|--------------|--------------|--------------|
| 1  |                 |              |             |              |              |            |              |              |              |              |
| 2  |                 |              |             |              |              |            |              |              |              |              |
| 3  |                 |              |             |              |              |            |              |              |              | 13.21)       |
| 4  |                 |              |             |              |              |            |              |              |              | -17.18       |
| 5  |                 | 17947        | 17043       | -5.04        | 64 (55 to    | 74 (59 to  | 15.86 (-8.37 | 5269 (4206   | 4364 (3404   | -29.98 to    |
| 6  | Romania         | (15104 to    | (15232 to   | (-15.24 to   | 76)          | 93)        | to 45.57)    | to 6540)     | to 5459)     | -2.13)       |
| 7  |                 | 21254)       | 19020)      | 7.37)        |              |            |              |              |              |              |
| 8  |                 |              |             |              |              |            |              | 53401        | 56533        |              |
| 9  | Russian         | 167371       | 170565      | 1.91 (-0.13  | 977 (726 to  | 1257 (1021 | 28.65 (6.46  | (41640 to    | (46127 to    | 5.86 (-5.94  |
| 10 | Federation      | (141580 to   | (145182 to  | to 4.04)     | 1128)        | to 1464)   | to 62.61)    | 64977)       | 69324)       | to 23.29)    |
| 11 |                 | 195591)      | 199143)     |              |              |            |              |              |              |              |
| 12 |                 |              |             | 152.30       |              |            | 21.96        |              |              |              |
| 13 | Rwanda          | 288 (237 to  | 726 (584 to | (132.10 to   | 34 (20 to    | 42 (27 to  | (-36.82 to   | 1761 (735 to | 1838 (1153   | 4.34 (-55.16 |
| 14 |                 | 355)         | 888)        | 172.65)      | 59)          | 62)        | 143.44)      | 3717)        | to 3012)     | to 173.20)   |
| 15 |                 |              |             |              |              |            |              |              |              |              |
| 16 |                 |              |             | 106.61       |              |            |              |              |              | 14.61        |
| 17 | Saint Kitts and |              | 21 (17 to   | (90.32 to    | 1 (1 to 1)   | 1 (1 to 1) | 9.71 (-25.03 | 25 (19 to    | 28 (19 to    | (-24.18 to   |
| 18 | Nevis           | 10 (8 to 12) | 26)         | 126.13)      |              |            | to 72.10)    | 29)          | 41)          | 78.38)       |
| 19 |                 |              |             | 131.09       |              |            |              |              |              |              |
| 20 |                 |              |             | (113.96 to   | 1 (1 to 1)   | 1 (1 to 2) | 47.65 (10.86 | 36 (29 to    | 45 (36 to    | 26.50 (-1.54 |
| 21 | Saint Lucia     | 25 (21 to    | 59 (48 to   | 149.59)      |              |            | to 116.72)   | 41)          | 56)          | to 79.21)    |
| 22 |                 | 31)          | 72)         |              |              |            |              |              |              |              |
| 23 |                 |              |             | 63.64 (48.19 | 1 (1 to 1)   | 2 (1 to 2) | 54.50 (13.27 | 39 (32 to    | 49 (40 to    | 27.47 (-3.02 |
| 24 | Saint Vincent   | 20 (16 to    | 32 (26 to   | to 80.82)    |              |            | to 112.91)   | 45)          | 62)          | to 72.66)    |
| 25 | and the         | 24)          | 39)         |              |              |            |              |              |              |              |
| 26 | Grenadines      |              |             | 34.52 (23.82 | 1 (1 to 1)   | 1 (1 to 1) | 6.37 (-33.37 | 31 (20 to    | 30 (19 to    | -1.06        |
| 27 |                 | 6 (5 to 8)   | 9 (7 to 10) | to 45.98)    |              |            | to 64.06)    | 46)          | 45)          | (-42.04 to   |
| 28 | Samoa           |              |             |              |              |            |              |              |              | 65.39)       |
| 29 |                 |              |             | 65.44 (55.11 | 0 (0 to 0)   | 0 (0 to 0) | 167.91       |              |              | 74.92 (47.44 |
| 30 | San Marino      | 29 (25 to    | 48 (41 to   | to 76.39)    |              |            | (65.76 to    | 6 (4 to 8)   | 10 (8 to 14) | to 111.54)   |
| 31 |                 | 35)          | 57)         |              |              |            | 328.84)      |              |              |              |
| 32 |                 |              |             | 135.19       |              |            |              |              |              |              |
| 33 | Sao Tome and    |              | 18 (15 to   | (118.79 to   | 0 (0 to 1)   | 0 (0 to 1) | 3.87 (-41.14 | 15 (8 to 24) | 16 (11 to    | 4.71 (-42.23 |
| 34 | Principe        | 8 (6 to 10)  | 23)         | 152.91)      |              |            | to 89.85)    |              | 24)          | to 108.14)   |
| 35 |                 |              |             | 268.63       |              |            |              |              |              |              |
| 36 |                 |              |             | (237.42 to   | 12 (7 to 20) | 27 (18 to  | 131.24 (9.23 | 1012 (729 to | 3181 (2284   | 214.41       |
| 37 | Saudi Arabia    | 3748 (3112   | (11338 to   | 301.72)      |              | 38)        | to 337.69)   | 1405)        | to 4376)     | (119.36 to   |
| 38 |                 | to 4462)     | 16751)      |              |              |            |              |              |              | 315.14)      |
| 39 |                 |              |             | 153.93       |              |            |              |              |              |              |
| 40 |                 |              |             | (136.66 to   | 23 (10 to    | 37 (22 to  | 61.95 (2.65  | 1084 (420 to | 1527 (911 to | 40.90        |
| 41 | Senegal         | 366 (298 to  | 930 (756 to | 171.52)      | 37)          | 57)        | to 184.83)   | 1912)        | 2378)        | (-20.02 to   |
| 42 |                 | 449)         | 1164)       |              |              |            |              |              |              | 185.33)      |
| 43 |                 |              |             | 30.30 (20.12 | 49 (37 to    | 113 (74 to | 128.93 (9.06 | 3314 (2528   | 4741 (3595   | 43.04 (-2.81 |
| 44 | Serbia          | (10737 to    | (14322 to   | to 43.95)    | 78)          | 147)       | to 259.34)   | to 4479)     | to 5996)     | to 78.90)    |
| 45 |                 | 14873)       | 19211)      |              |              |            |              |              |              |              |
| 46 |                 |              |             | 117.31       |              |            |              |              |              |              |
| 47 |                 |              |             | (99.80 to    | 0 (0 to 0)   | 0 (0 to 0) | 28.62 (-7.02 | 5 (4 to 7)   | 7 (5 to 9)   | 31.52 (-0.75 |
| 48 | Seychelles      | 3 (2 to 4)   | 6 (5 to 8)  | 136.88)      |              |            | to 75.47)    |              |              | to 71.15)    |
| 49 |                 |              |             | 158.32       |              |            |              |              |              |              |
| 50 |                 |              |             | (138.65 to   | 11 (4 to 19) | 20 (10 to  | 87.02 (3.04  | 554 (164 to  | 981 (457 to  | 76.91 (-7.60 |
| 51 | Sierra Leone    | 181 (149 to  | 467 (379 to | 178.83)      |              | 32)        | to 331.6)    | 1133)        | 1656)        | to 330.39)   |
| 52 |                 | 220)         | 582)        |              |              |            |              |              |              |              |
| 53 |                 |              |             | 96.84 (78.98 | 4 (3 to 4)   | 5 (4 to 8) | 39.94 (6.12  | 375 (279 to  | 612 (427 to  | 63.29 (34.14 |
| 54 | Singapore       | 1615 (1305   | 3179 (2593  |              |              |            |              |              |              |              |
| 55 |                 |              |             |              |              |            |              |              |              |              |
| 56 |                 |              |             |              |              |            |              |              |              |              |
| 57 |                 |              |             |              |              |            |              |              |              |              |
| 58 |                 |              |             |              |              |            |              |              |              |              |
| 59 |                 |              |             |              |              |            |              |              |              |              |
| 60 |                 |              |             |              |              |            |              |              |              |              |



|    |              |             |             |              |              |             |              |              |              |              |
|----|--------------|-------------|-------------|--------------|--------------|-------------|--------------|--------------|--------------|--------------|
| 1  |              |             |             |              |              |             |              |              |              |              |
| 2  |              |             |             |              |              |             |              |              |              |              |
| 3  |              | to 1934)    | to 3962)    | to 116.81)   |              | to 150.34)  | 490)         | 838)         | to 100.87)   |              |
| 4  |              | 9361 (8373  | 10674 (9737 | 14.02 (8.30  | 31 (25 to    | 58 (41 to   | 88.23 (-3.03 | 2274 (1743   | 2856 (2175   | 25.60 (-5.11 |
| 5  | Slovakia     | to 10336)   | to 11684)   | to 20.14)    | 48)          | 76)         | to 176.55)   | to 2989)     | to 3557)     | to 53.77)    |
| 6  |              | 3775 (3318  | 4739 (4282  | 25.55 (17.98 |              | 18 (13 to   | 86.00 (28.56 | 781 (579 to  | 977 (726 to  | 25.10 (7.66  |
| 7  |              | to 4289)    | to 5219)    | to 33.07)    | 10 (8 to 13) | 25)         | to 165.93)   | 1011)        | 1253)        | to 43.50)    |
| 8  | Slovenia     |             |             | 124.02       |              |             |              |              |              |              |
| 9  |              | 8 (6 to 9)  | 17 (13 to   | (102.93 to   | 1 (1 to 2)   | 2 (1 to 3)  | 64.34 (-3.76 | 53 (24 to    | 86 (48 to    | 63.24 (-5.21 |
| 10 | Solomon      |             | 21)         | 148.4)       |              |             | to 176.72)   | 101)         | 156)         | to 190.03)   |
| 11 | Islands      |             |             | 165.38       |              |             |              |              |              |              |
| 12 |              | 237 (190 to | 630 (502 to | (145.60 to   | 19 (7 to 40) | 40 (21 to   | 109.57       | 1021 (282 to | 1986 (928 to | 94.57 (2.46  |
| 13 |              | 293)        | 786)        | 187.38)      |              | 71)         | (26.24 to    | 2543)        | 3988)        | to 316.32)   |
| 14 | Somalia      |             |             | 122.12       |              |             | 263.84)      |              |              |              |
| 15 |              | 2945 (2438  | 6542 (5423  | (114.01 to   | 98 (69 to    | 166 (124 to | 69.87 (20.49 | 4862 (3068   | 6143 (4966   | 26.34        |
| 16 |              | to 3586)    | to 7934)    | 131.25)      | 123)         | 196)        | to 168.66)   | to 7236)     | to 7083)     | (-18.56 to   |
| 17 | South Africa |             |             | 88.39 (73.80 |              |             |              |              |              | 13.58        |
| 18 |              | 249 (202 to | 469 (383 to | to 103.53)   | 22 (9 to 43) | 29 (16 to   | 29.68        | 1158 (325 to | 1315 (637 to |              |
| 19 | South Sudan  | 307)        | 576)        |              |              | 61)         | (-39.27 to   | 2801)        | 2625)        | (-53.56 to   |
| 20 |              |             |             | 98.14 (91.73 |              |             | 148.37)      |              |              | 178.43)      |
| 21 |              | 39276       | 77822       | 278 (237 to  | 377 (303 to  | 35.79 (8.43 |              | 11347 (9316  | 17466        | 53.93 (36.17 |
| 22 |              | (37463 to   | (74030 to   | to 104.75)   | 304)         | 600)        | to 121.33)   | to 13673)    | (13535 to    | to 79.47)    |
| 23 | Spain        | 41127)      | 81685)      |              |              |             |              |              | 22106)       |              |
| 24 |              | 909 (734 to | 2295 (2003  | 152.54       | 19 (14 to    | 21 (15 to   | 13.97        | 813 (609 to  | 895 (684 to  | 10.11        |
| 25 |              | 1119)       | to 2637)    | (124.22 to   | 24)          | 30)         | (-25.92 to   | 1032)        | 1147)        | (-20.92 to   |
| 26 | Sri Lanka    |             |             | 186.13)      |              |             | 74.18)       |              |              | 51.47)       |
| 27 |              | 3315 (2684  | 9292 (7568  | 180.28       | 21 (10 to    | 48 (28 to   | 123.91 (3.53 | 1310 (720 to | 3003 (2102   | 129.31 (11.1 |
| 28 |              | to 4060)    | to 11371)   | (157.81 to   | 44)          | 78)         | to 380.84)   | 2866)        | to 4130)     | to 282.19)   |
| 29 | Sudan        |             |             | 205.52)      |              |             |              |              |              |              |
| 30 |              | 79 (66 to   | 158 (129 to | 98.73 (81.35 | 3 (2 to 3)   | 4 (3 to 5)  | 32.93 (-4.19 | 118 (85 to   | 138 (109 to  | 16.97        |
| 31 | Suriname     | 96)         | 194)        | to 117.62)   |              |             | to 91.78)    | 146)         | 175)         | (-14.68 to   |
| 32 |              |             |             |              |              |             |              |              |              | 66.50)       |
| 33 |              | 30612       | 40244       | 31.46 (23.94 | 107 (86 to   | 95 (77 to   | -11.38       | 6158 (4631   | 7117 (5148   | 15.58 (4.65  |
| 34 |              | (26350 to   | (34733 to   | to 40.19)    | 119)         | 139)        | (-27.36 to   | to 7936)     | to 9548)     | to 28.78)    |
| 35 | Sweden       | 35136)      | 46000)      |              |              |             | 46.41)       |              |              |              |
| 36 |              | 10695 (9668 | 14969       | 39.96 (33.88 | 73 (58 to    | 123 (97 to  | 69.01 (36.46 | 2817 (2268   | 3807 (2979   | 35.16 (21.15 |
| 37 | Switzerland  | to 11813)   | (13688 to   | to 46.34)    | 83)          | 160)        | to 128.96)   | to 3429)     | to 4738)     | to 56.09)    |
| 38 |              |             |             | 116.26       |              |             |              |              |              |              |
| 39 |              | 2248 (1819  | 4862 (3940  | (97.13 to    | 23 (13 to    | 37 (20 to   | 57.25        | 1091 (741 to | 1653 (1195   | 51.58 (7.71  |
| 40 |              | to 2734)    | to 5871)    | 135.91)      | 35)          | 52)         | (-10.52 to   | 1432)        | to 2195)     | to 137.88)   |
| 41 | Syrian Arab  |             |             | 308.12       |              |             | 184.61)      |              |              |              |
| 42 | Republic     |             |             |              |              |             |              |              |              |              |
| 43 |              | 2221 (1923  | 9064 (8139  | (279.81 to   | 101 (67 to   | 199 (152 to | 97.46 (44.81 | 2623 (1919   | 4338 (3499   | 65.37 (31.64 |
| 44 | Taiwan       | to 2557)    | to 10153)   | 342.19)      | 113)         | 264)        | to 288.02)   | to 2947)     | to 5416)     | to 167.25)   |
| 45 | (Province of |             |             |              |              |             |              |              |              |              |
| 46 | China)       |             |             | 130.78       |              |             |              |              |              |              |
| 47 |              | 2391 (1972  | 5519 (4623  | (115.02 to   | 21 (11 to    | 18 (13 to   | -11.19       | 1691 (853 to | 1646 (1219   | -2.66        |
| 48 |              | to 2877)    | to 6632)    | 148.48)      | 34)          | 26)         | (-54.29 to   | 2831)        | to 2185)     | (-48.60 to   |
| 49 | Tajikistan   |             |             |              |              |             | 82.80)       |              |              | 91.67)       |
| 50 |              |             |             |              |              |             |              |              |              |              |
| 51 |              |             |             |              |              |             |              |              |              |              |
| 52 |              |             |             |              |              |             |              |              |              |              |
| 53 |              |             |             |              |              |             |              |              |              |              |
| 54 |              |             |             |              |              |             |              |              |              |              |
| 55 |              |             |             |              |              |             |              |              |              |              |
| 56 |              |             |             |              |              |             |              |              |              |              |
| 57 |              |             |             |              |              |             |              |              |              |              |
| 58 |              |             |             |              |              |             |              |              |              |              |
| 59 |              |             |             |              |              |             |              |              |              |              |
| 60 |              |             |             |              |              |             |              |              |              |              |



|    |              |              |             |              |              |              |              |             |              |              |
|----|--------------|--------------|-------------|--------------|--------------|--------------|--------------|-------------|--------------|--------------|
| 1  |              |              |             |              |              |              |              |             |              |              |
| 2  |              |              |             |              |              |              |              |             |              |              |
| 3  |              |              | 119.65      |              |              |              |              |             |              | 12.87        |
| 4  | Thailand     | 1734 (1327   | 3808 (3078  | (96.59 to    | 72 (52 to    | 111 (80 to   | 54.05 (-3.23 | 2899 (2029  | 3272 (2453   | (-26.29 to   |
| 5  |              | to 2180)     | to 4630)    | 151.17)      | 95)          | 149)         | to 138.51)   | to 3946)    | to 4259)     | 71.96)       |
| 6  |              |              |             |              |              |              |              |             |              |              |
| 7  |              |              | 122.2       |              |              |              | 107.01       |             |              | 47.21        |
| 8  | Timor-Leste  | 18 (14 to    | 41 (33 to   | (104.08 to   | 1 (1 to 3)   | 3 (2 to 5)   | (24.75 to    | 59 (29 to   | 86 (48 to    | (-28.05 to   |
| 9  |              | 23)          | 50)         | 146.48)      |              |              | 246.34)      | 102)        | 138)         | 185.55)      |
| 10 |              |              |             |              |              |              |              |             |              |              |
| 11 |              |              | 170.07      |              |              |              | 142.31       |             |              | 105.73       |
| 12 | Togo         | 190 (155 to  | 514 (418 to | (148.46 to   | 9 (4 to 14)  | 21 (14 to    | (33.33 to    | 457 (182 to | 940 (589 to  | (15.73 to    |
| 13 |              | 232)         | 634)        | 196.29)      |              | 30)          | 393.01)      | 773)        | 1321)        | 366.27)      |
| 14 |              |              |             |              |              |              |              |             |              |              |
| 15 |              |              | 17.45 (9.66 |              |              |              | -38.14       |             |              | -39.66       |
| 16 | Tokelau      | 0 (0 to 0)   | 0 (0 to 0)  | to 26.52)    | 0 (0 to 0)   | 0 (0 to 0)   | (-61.51 to   | 0 (0 to 1)  | 0 (0 to 0)   | (-63.93 to   |
| 17 |              |              |             |              |              |              |              |             |              |              |
| 18 |              |              |             |              |              |              | -1.52)       |             |              | 8.06)        |
| 19 |              |              |             |              |              |              |              |             |              |              |
| 20 | Tonga        | 4 (3 to 5)   | 4 (4 to 5)  | 14.32 (5.18  | 1 (0 to 1)   | 1 (0 to 1)   | 0.57 (-36.36 | 21 (14 to   | 19 (13 to    | (-43.54 to   |
| 21 |              |              |             | to 25.01)    |              |              | to 55.61)    | 30)         | 27)          | 36.78)       |
| 22 |              |              |             |              |              |              |              |             |              |              |
| 23 | Trinidad and | 275 (226 to  | 476 (395 to | 73.31 (60.64 | 3 (2 to 4)   | 5 (4 to 7)   | 67.08 (17.69 | 143 (110 to | 215 (162 to  | 49.93 (17.59 |
| 24 | Tobago       | 333)         | 586)        | to 88.40)    |              |              | to 135.28)   | 169)        | 279)         | to 92.29)    |
| 25 |              |              |             |              |              |              |              |             |              |              |
| 26 |              |              | 139.49      |              |              |              | 124.51       |             |              | 113.58       |
| 27 | Tunisia      | 2247 (1845   | 5382 (4413  | (122.55 to   | 7 (5 to 11)  | 16 (11 to    | (18.63 to    | 569 (405 to | 1215 (890 to | (59.27 to    |
| 28 |              | to 2720)     | to 6568)    | 159.3)       |              | 23)          | 312.49)      | 784)        | 1622)        | 174.73)      |
| 29 |              |              |             |              |              |              |              |             |              |              |
| 30 |              | 24930        | 93902       | 276.67       | 261 (159 to  | 329 (250 to  | 26.21        | 13910 (9268 | 22488        | 61.67 (9.74  |
| 31 | Turkey       | (21910 to    | (80596 to   | (231.04 to   | 401)         | 471)         | (-22.73 to   | to 19352)   | (17253 to    | to 147.01)   |
| 32 |              | 28012)       | 107925)     | 325.07)      |              |              | 118.88)      |             | 28896)       |              |
| 33 |              |              |             |              |              |              |              |             |              |              |
| 34 | Turkmenistan | 1758 (1463   | 3806 (3155  | 116.48       | 10 (7 to 13) | 14 (9 to 20) | 45.23 (9.53  | 765 (493 to | 1120 (805 to | 46.38 (13.41 |
| 35 |              | to 2085)     | to 4551)    | (102.66 to   |              |              | to 98.88)    | 1049)       | 1438)        | to 91.33)    |
| 36 |              |              |             |              |              |              |              |             |              |              |
| 37 |              |              |             |              |              |              |              |             |              |              |
| 38 | Tuvalu       | 0 (0 to 0)   | 0 (0 to 1)  | 27.01 (14.84 | 0 (0 to 0)   | 0 (0 to 0)   | -5.17        | 3 (1 to 5)  | 2 (1 to 4)   | -16.57       |
| 39 |              |              |             | to 39.84)    |              |              | (-39.67 to   |             |              | (-50.42 to   |
| 40 |              |              |             |              |              |              |              |             |              |              |
| 41 |              |              |             |              |              |              | 57.04)       |             |              | 58.50)       |
| 42 | Uganda       | 569 (462 to  | 1697 (1381  | 198.27       | 48 (30 to    | 102 (70 to   | 114.15       | 2257 (1132  | 4600 (3084   | 103.84       |
| 43 |              | 701)         | to 2111)    | (178.98 to   | 75)          | 150)         | (26.45 to    | to 4612)    | to 7058)     | (-2.52 to    |
| 44 |              |              |             | 220.89)      |              |              | 252.91)      |             |              | 318.38)      |
| 45 |              |              |             |              |              |              |              |             |              |              |
| 46 | Ukraine      | 44470        | 42711       | -3.95        | 230 (174 to  | 260 (210 to  | 12.61        | 13419       | 14197        | 5.80 (-13.37 |
| 47 |              | (37197 to    | (36101 to   | (-10.23 to   | 306)         | 315)         | (-17.79 to   | (10673 to   | (11469 to    | to 26.77)    |
| 48 |              | 53622)       | 51042)      | 3.42)        |              |              | 52.12)       | 16857)      | 17211)       |              |
| 49 |              |              |             |              |              |              |              |             |              |              |
| 50 | United Arab  | 595 (477 to  | 5742 (4546  | 864.58       | 1 (1 to 3)   | 13 (7 to 22) | 939.61       | 144 (93 to  | 1401 (971 to | 871.11       |
| 51 | Emirates     | 725)         | to 7126)    | (768.02 to   |              |              | (312.54 to   | 219)        | 1965)        | (531.13 to   |
| 52 |              |              |             | 978.3)       |              |              | 2260.01)     |             |              | 1256.31)     |
| 53 |              |              |             |              |              |              |              |             |              |              |
| 54 | United       | 150003       | 194529      | 29.68 (26.73 | 856 (756 to  | 1793 (1533   | 109.50       | 37500       | 55171        | 47.12 (29.39 |
| 55 | Kingdom      | (132531 to   | (173985 to  | to 33.13)    | 1056)        | to 1999)     | (62.60 to    | (30121 to   | (45323 to    | to 55.47)    |
| 56 |              | 168508)      | 215870)     |              |              |              | 132.89)      | 46024)      | 66217)       |              |
| 57 | United       |              |             | 157.88       | 86 (53 to    | 181 (115 to  | 111.26       | 4655 (2090  | 8565 (4988   | 83.97 (-7.81 |
| 58 | Republic of  | 1121 (914 to | 2891 (2330  | (138.98 to   | 152)         | 259)         | (24.98 to    | to 9955)    | to 14089)    | to 290.41)   |
| 59 | Tanzania     | 1369)        | to 3566)    | 177.80)      |              |              | 260.69)      |             |              |              |
| 60 |              |              |             |              |              |              |              |             |              |              |

|    |                |             |             |              |              |             |              |              |             |              |
|----|----------------|-------------|-------------|--------------|--------------|-------------|--------------|--------------|-------------|--------------|
| 1  |                |             |             |              |              |             |              |              |             |              |
| 2  |                |             |             |              |              |             |              |              |             |              |
| 3  |                | 982982      | 762890      | -22.39       |              |             | 172.17       | 186357       | 215289      |              |
| 4  | United States  | (846833 to  | (712357 to  | (-29.48 to   | 2171 (1940   | 5910 (4622  | (80.73 to    | (137531 to   | (175991 to  | 15.53 (-1.97 |
| 5  | of America     | 1129783)    | 813654)     | -14.49)      | to 2662)     | to 6464)    | 199.18)      | 243644)      | 256059)     | to 33.87)    |
| 6  |                |             |             |              |              |             | 11.78        |              |             | -9.33        |
| 7  |                |             |             |              |              |             |              |              |             |              |
| 8  | United States  | 32 (27 to   | 47 (39 to   | 46.61 (32.66 | 1 (0 to 1)   | 1 (1 to 1)  | (-24.49 to   | 26 (19 to    | 23 (18 to   | (-33.27 to   |
| 9  | Virgin Islands | 39)         | 58)         | to 61.87)    |              |             | 72.41)       | 32)          | 29)         | 25.88)       |
| 10 |                |             |             |              |              |             | 123.02       |              |             |              |
| 11 |                |             |             |              |              |             |              |              |             |              |
| 12 | Uruguay        | 586 (485 to | 685 (564 to | 16.85 (7.20  | 10 (9 to 14) | 22 (19 to   | (68.94 to    | 339 (290 to  | 572 (496 to | 68.83 (35.57 |
| 13 |                | 711)        | 830)        | to 26.83)    |              | 26)         | 165.97)      | 426)         | 648)        | to 94.94)    |
| 14 |                |             |             |              |              |             |              |              |             |              |
| 15 |                |             |             |              |              |             |              |              |             |              |
| 16 | Uzbekistan     | 10505 (8847 | 23340       | 122.19       | 48 (31 to    | 73 (58 to   | 51.36 (12.53 | 4299 (3006   | 6869 (5391  | 59.77 (27.87 |
| 17 |                | to 12563)   | (19452 to   | (107.43 to   | 59)          | 93)         | to 153.54)   | to 5336)     | to 8500)    | to 109.54)   |
| 18 |                |             |             |              |              |             |              |              |             |              |
| 19 |                |             |             | 115.45       |              |             |              |              |             |              |
| 20 | Vanuatu        | 4 (3 to 5)  | 9 (7 to 11) | (98.23 to    | 1 (0 to 1)   | 2 (1 to 2)  | 77.85 (12.27 | 33 (17 to    | 57 (33 to   | 71.58 (-1.00 |
| 21 |                |             |             | 135.09)      |              |             | to 189.96)   | 55)          | 92)         | to 187.82)   |
| 22 |                |             |             |              |              |             |              |              |             |              |
| 23 | Venezuela      |             |             | 130.21       |              |             |              |              |             |              |
| 24 | (Bolivarian    | 3817 (3268  | 8787 (7406  | (113.08 to   | 28 (19 to    | 44 (31 to   | 58.23 (11.55 | 1676 (1316   | 2642 (2032  | 57.61 (25.64 |
| 25 | Republic of)   | to 4388)    | to 10382)   | 147.54)      | 32)          | 59)         | to 165.19)   | to 1993)     | to 3372)    | to 101.69)   |
| 26 |                |             |             |              |              |             |              |              |             |              |
| 27 |                |             |             | 326.50       |              |             | -19.57       |              |             | 11.56        |
| 28 | Viet Nam       | 4754 (3636  | 20278       | (284.54 to   | 221 (120 to  | 177 (119 to | (-57.9 to    | 6650 (4129   | 7419 (5510  | (-26.71 to   |
| 29 |                | to 5967)    | (16050 to   | 376.20)      | 327)         | 247)        | 40.02)       | to 8928)     | to 9604)    | 73.67)       |
| 30 |                |             |             |              |              |             |              |              |             |              |
| 31 |                |             |             | 244.20       |              |             | 217.58       |              |             | 213.69       |
| 32 | Yemen          | 1826 (1464  | 6284 (5044  | (216.72 to   | 14 (8 to 25) | 44 (30 to   | (89.82 to    | 772 (495 to  | 2423 (1790  | (96.39 to    |
| 33 |                | to 2237)    | to 7734)    | 270.66)      |              | 68)         | 463.74)      | 1411)        | to 3248)    | 365.86)      |
| 34 |                |             |             |              |              |             |              |              |             |              |
| 35 |                |             |             | 233.83       |              |             | 57.07        |              |             | 31.27        |
| 36 | Zambia         | 291 (236 to | 971 (790 to | (206.24 to   | 35 (18 to    | 55 (38 to   | (-21.84 to   | 1941 (679 to | 2548 (1621  | (-46.88 to   |
| 37 |                | 350)        | 1210)       | 265.39)      | 64)          | 76)         | 226.50)      | 4527)        | to 3800)    | 283.23)      |
| 38 |                |             |             |              |              |             |              |              |             |              |
| 39 | Zimbabwe       | 524 (430 to | 931 (757 to | 77.84 (65.57 | 22 (16 to    | 43 (25 to   | 98.08 (13.90 | 1018 (652 to | 1888 (1075  | 85.39 (11.43 |
| 40 |                | 644)        | 1165)       | to 91.40)    | 31)          | 65)         | to 202.61)   | 1728)        | to 2968)    | to 204.97)   |

Abbreviations: UI=uncertainty interval.

**Supplementary Table 3** Age-standardised prevalence, death and DALY rates for inflammatory bowel disease (IBD) by 204 countries or territories in 1990 and 2019, and their temporal trends from 1990 to 2019

| Characteristics     | Age-standardised prevalence rate |                           |                        | Age-standardized death rate |                     |                        | Age-standardized DALY rate |                        |                        |
|---------------------|----------------------------------|---------------------------|------------------------|-----------------------------|---------------------|------------------------|----------------------------|------------------------|------------------------|
|                     | per 100,000 population           |                           |                        | per 100,000 population      |                     |                        | per 100,000 population     |                        |                        |
|                     | 1990 No.<br>(95%UI)              | 2019 No.<br>(95%UI)       | EAPC No.<br>(95%CI)    | 1990 No.<br>(95%UI)         | 2019 No.<br>(95%UI) | EAPC No.<br>(95%CI)    | 1990 No.<br>(95%UI)        | 2019 No.<br>(95%UI)    | EAPC No.<br>(95%CI)    |
| Afghanistan         | 21.95 (17.75 to 26.86)           | 23.69 (19.05 to 29.24)    | 0.57 (0.40 to 0.74)    | 0.44 (0.22 to 0.78)         | 0.43 (0.26 to 0.64) | 0.01 (-0.06 to 0.08)   | 15.26 (8.26 to 26.64)      | 14.58 (9.58 to 20.47)  | 0.03 (-0.06 to 0.12)   |
| Albania             | 119.15 (100.27 to 140.7)         | 116.19 (97.53 to 136.91)  | 0.01 (-0.06 to 0.09)   | 1.65 (0.90 to 2.05)         | 0.41 (0.27 to 0.61) | -5.17 (-6.14 to -4.19) | 110.06 (47.30 to 143.55)   | 36.18 (25.65 to 49.28) | -4.07 (-5.01 to -3.12) |
| Algeria             | 34.69 (30.01 to 40.15)           | 39.54 (32.16 to 48.88)    | 0.68 (0.53 to 0.83)    | 0.25 (0.17 to 0.37)         | 0.17 (0.13 to 0.23) | -1.14 (-1.23 to -1.04) | 11.17 (8.26 to 15.40)      | 9.93 (7.45 to 12.97)   | -0.28 (-0.38 to -0.17) |
| American Samoa      | 6.24 (5.14 to 7.41)              | 6.14 (5.03 to 7.38)       | -0.22 (-0.35 to -0.09) | 1.54 (0.89 to 2.28)         | 0.53 (0.37 to 0.90) | -4.40 (-4.80 to -4.01) | 44.49 (26.51 to 63.51)     | 15.67 (10.89 to 28.11) | -4.23 (-4.59 to -3.86) |
| Andorra             | 108.82 (91.32 to 128.78)         | 112.31 (94.3 to 132.64)   | 0.17 (0.11 to 0.22)    | 0.70 (0.49 to 1.00)         | 0.69 (0.41 to 1.01) | 0.03 (-0.06 to 0.13)   | 29.98 (22.66 to 38.91)     | 29.68 (20.92 to 39.03) | 0.02 (-0.03 to 0.07)   |
| Angola              | 7.20 (5.93 to 9.02)              | 8.85 (7.31 to 10.88)      | 0.59 (0.48 to 0.71)    | 0.73 (0.43 to 1.16)         | 0.62 (0.45 to 0.89) | -0.60 (-0.66 to -0.54) | 23.37 (11.91 to 42.94)     | 18.19 (12.6 to 26.15)  | -0.89 (-0.95 to -0.83) |
| Antigua and Barbuda | 31.33 (26.25 to 37.78)           | 31.79 (26.42 to 38.6)     | 0.10 (0.04 to 0.16)    | 0.95 (0.70 to 1.12)         | 0.67 (0.53 to 0.91) | -1.77 (-2.08 to -1.46) | 31.60 (24.03 to 36.76)     | 22.35 (17.9 to 28.99)  | -1.66 (-1.90 to -1.42) |
| Argentina           | 15.07 (12.24 to 17.99)           | 15.98 (13.09 to 19.42)    | 0.21 (0.19 to 0.23)    | 0.27 (0.24 to 0.30)         | 0.27 (0.23 to 0.31) | -0.10 (-0.25 to 0.04)  | 9.25 (8.00 to 10.66)       | 9.02 (7.72 to 10.63)   | -0.13 (-0.22 to -0.05) |
| Armenia             | 81.15 (67.51 to 95.76)           | 86.67 (72.86 to 104.56)   | 0.29 (0.26 to 0.32)    | 0.25 (0.19 to 0.30)         | 0.28 (0.21 to 0.34) | 0.72 (0.36 to 1.09)    | 19.99 (15.55 to 25.21)     | 20.5 (15.81 to 26.35)  | 0.20 (0.05 to 0.36)    |
| Australia           | 98.73 (82.47 to 116.23)          | 154.35 (134.91 to 175.51) | 1.00 (0.72 to 1.27)    | 0.54 (0.47 to 0.66)         | 0.78 (0.56 to 0.91) | 2.23 (1.81 to 2.66)    | 24.61 (19.22 to 31.12)     | 35.58 (27.28 to 45.33) | 1.20 (0.98 to 1.41)    |
| Austria             | 277.06 (243.01 to 307.67)        | 291.88 (260.14 to 327.43) | 0.19 (-0.09 to 0.46)   | 0.87 (0.77 to 1.13)         | 0.52 (0.43 to 0.81) | -1.59 (-2.15 to -1.03) | 61.71 (48.41 to 77.45)     | 54.31 (39.35 to 71.37) | -0.39 (-0.65 to -0.12) |
| Azerbaijan          | 76.23 (63.23 to 90.47)           | 81.93 (68.62 to 99.02)    | 0.35 (0.20 to 0.49)    | 0.22 (0.16 to 0.28)         | 0.16 (0.11 to 0.23) | -1.09 (-1.19 to -1.00) | 17.65 (13.27 to 23.02)     | 16.2 (11.65 to 21.65)  | -0.36 (-0.44 to -0.27) |
| Bahamas             | 32.77 (27.60 to 39.08)           | 28.72 (23.64 to 35.44)    | -0.27 (-0.39 to -0.15) | 0.59 (0.50 to 0.68)         | 0.49 (0.39 to 0.62) | -0.66 (-0.78 to -0.53) | 23.15 (19.78 to 26.78)     | 19.04 (15.33 to 23.86) | -0.72 (-0.81 to -0.63) |
| Bahrain             | 42.17 (36.27 to 48.42)           | 44.05 (36.4 to 53.11)     | 0.35 (0.18 to 0.51)    | 0.26 (0.20 to 0.33)         | 0.17 (0.13 to 0.22) | -1.34 (-1.69 to -0.99) | 11.98 (9.36 to 15.18)      | 10.05 (7.4 to 13.28)   | -0.53 (-0.63 to -0.43) |
| Bangladesh          | 17.19 (13.90 to 21.66)           | 21.62 (17.31 to 27)       | 0.65 (0.53 to 0.77)    | 1.00 (0.64 to 1.64)         | 0.56 (0.35 to 0.83) | -2.14 (-2.39 to -1.89) | 31.40 (20.47 to 45.16)     | 18.1 (12.11 to 25.27)  | -2.03 (-2.15 to -1.92) |
| Barbados            | 70.62 (59.14 to 84.46)           | 69.57 (58.9 to 83.59)     | 0.04 (-0.02 to 0.09)   | 0.42 (0.36 to 0.48)         | 0.38 (0.30 to 0.48) | -0.41 (-0.57 to -0.25) | 22.21 (18.13 to 27.15)     | 20.02 (15.56 to 25.32) | -0.42 (-0.48 to -0.36) |
| Belarus             | 82.25 (69.99 to 95.76)           | 87.85 (73.61 to 104.56)   | 0.38 (0.27 to 0.49)    | 0.36 (0.26 to 0.46)         | 0.38 (0.28 to 0.48) | 0.24 (0.09 to 0.39)    | 22.33 (16.76 to 27.90)     | 23.25 (17.89 to 28.61) | 0.17 (0.09 to 0.25)    |

|    |                 |               |               |               |               |               |               |              |               |               |
|----|-----------------|---------------|---------------|---------------|---------------|---------------|---------------|--------------|---------------|---------------|
| 1  |                 |               |               |               |               |               |               |              |               |               |
| 2  |                 |               |               |               |               |               |               |              |               |               |
| 3  |                 | to 96.97)     | to 104.11)    | 0.48)         | 0.48)         | 0.50)         | 0.39)         | to 28.89)    | to 29.87)     | 0.25)         |
| 4  |                 |               | 143.07        |               |               |               |               |              |               |               |
| 5  |                 | 83.42 (76.75  | (123.44 to    | 1.68 (1.42 to | 0.76 (0.67 to | 0.97 (0.76 to | 0.24 (-0.90   | 25.98 (21.36 | 36.56 (28.88  | 0.82 (0.35 to |
| 6  | Belgium         | to 90.48)     | 164.68)       | 1.94)         | 0.90)         | 1.12)         | to 1.40)      | to 31.07)    | to 45.93)     | 1.28)         |
| 7  |                 |               |               |               |               |               |               |              |               |               |
| 8  |                 |               |               |               |               |               |               |              |               |               |
| 9  | Belize          | 22.80 (18.88  | 24.31 (20.10  | 0.35 (0.25 to | 0.70 (0.48 to | 0.61 (0.50 to | -1.14 (-1.52  | 26.21 (19.11 | 21.80 (18.03  | -1.22 (-1.49  |
| 10 |                 | to 28.09)     | to 29.68)     | 0.45)         | 0.90)         | 0.80)         | to -0.76)     | to 32.42)    | to 27.26)     | to -0.95)     |
| 11 |                 |               |               |               |               |               |               |              |               |               |
| 12 | Benin           | 7.48 (6.20 to | 8.88 (7.27 to | 0.58 (0.47 to | 0.48 (0.26 to | 0.45 (0.30 to | -0.42 (-0.64  | 17.20 (8.03  | 15.67 (9.98   | -0.50 (-0.70  |
| 13 |                 | 9.10)         | 10.87)        | 0.69)         | 0.86)         | 0.65)         | to -0.20)     | to 28.30)    | to 22.61)     | to -0.30)     |
| 14 | Bermuda         | 34.26 (28.75  | 34.27 (28.46  | 0.17 (0.09 to | 0.89 (0.66 to | 0.36 (0.28 to | -3.73 (-4.07  | 28.26 (22.38 | 14.3 (11.3 to | -2.73 (-3.00  |
| 15 |                 | to 41.82)     | to 40.73)     | 0.25)         | 1.08)         | 0.50)         | to -3.40)     | to 33.89)    | 18.41)        | to -2.46)     |
| 16 |                 |               |               |               |               |               |               |              |               |               |
| 17 | Bhutan          | 16.74 (13.31  | 22.23 (18.11  | 1.24 (1.11 to | 0.68 (0.35 to | 0.55 (0.34 to | -0.84 (-0.97  | 21.23 (11.26 | 15.82 (10.39  | -1.18 (-1.27  |
| 18 |                 | to 21.03)     | to 27.62)     | 1.38)         | 1.53)         | 1.23)         | to -0.72)     | to 43.14)    | to 31.52)     | to -1.10)     |
| 19 | Bolivia         |               |               |               |               |               |               |              |               |               |
| 20 | (Plurinational  | 13.46 (11.31  | 13.54 (11.36  | 0.05 (0.00 to | 0.50 (0.27 to | 0.40 (0.30 to | -0.83 (-0.91  | 22.17 (10.30 | 12.73 (9.53   | -2.04 (-2.15  |
| 21 | State of)       | to 16.36)     | to 16.33)     | 0.10)         | 0.79)         | 0.52)         | to -0.75)     | to 41.41)    | to 16.38)     | to -1.94)     |
| 22 |                 |               |               |               |               |               |               |              |               |               |
| 23 | Bosnia and      | 102.41        | 122.38        | 0.58 (0.55 to | 0.46 (0.33 to | 0.45 (0.23 to | -0.20 (-0.52  | 27.68 (21.43 | 29.74 (21.21  | 0.14 (-0.01   |
| 24 | Herzegovina     | (88.37 to     | (107.08 to    | 0.61)         | 0.58)         | 0.61)         | to 0.12)      | to 35.18)    | to 38.84)     | to 0.28)      |
| 25 |                 | 118.99)       | 140.67)       |               |               |               |               |              |               |               |
| 26 |                 |               |               |               |               |               |               |              |               |               |
| 27 | Botswana        | 8.58 (7.14 to | 10.89 (8.88   | 0.60 (0.44 to | 0.70 (0.48 to | 0.64 (0.43 to | -0.77 (-1.15  | 20.94 (14.53 | 20.3 (13.14   | -0.41 (-0.71  |
| 28 |                 | 10.52)        | to 13.6)      | 0.76)         | 1.00)         | 0.89)         | to -0.39)     | to 29.34)    | to 30.81)     | to -0.11)     |
| 29 |                 |               |               |               |               |               |               |              |               |               |
| 30 | Brazil          | 65.87 (57.91  | 47.78 (41.6   | -0.87 (-1.09  | 0.48 (0.42 to | 0.45 (0.41 to | 0.01 (-0.16   | 23.70 (20.23 | 19.51 (16.72  | -0.44 (-0.62  |
| 31 |                 | to 74.92)     | to 54.51)     | to -0.65)     | 0.52)         | 0.52)         | to 0.19)      | to 27.67)    | to 22.74)     | to -0.27)     |
| 32 | Brunei          | 53.76 (43.58  | 57.28 (46.33  | 0.25 (0.24 to | 1.52 (1.08 to | 1.48 (0.97 to | 0.09 (-0.02   | 36.51 (27.84 | 32.76 (26.62  | -0.25 (-0.33  |
| 33 | Darussalam      | to 66.16)     | to 70.04)     | 0.27)         | 2.01)         | 1.89)         | to 0.20)      | to 47.59)    | to 39.71)     | to -0.18)     |
| 34 |                 |               |               |               |               |               |               |              |               |               |
| 35 | Bulgaria        | 127.47        | 120.16        | -0.16 (-0.29  | 0.26 (0.23 to | 0.33 (0.25 to | 1.13 (0.73 to | 28.31 (21.41 | 27.62 (20.56  | 0.00 (-0.21   |
| 36 |                 | (108.71 to    | (101.94 to    | to -0.03)     | 0.31)         | 0.41)         | 1.54)         | to 36.54)    | to 35.57)     | to 0.21)      |
| 37 |                 | 149.68)       | 142.65)       |               |               |               |               |              |               |               |
| 38 |                 |               |               |               |               |               |               |              |               |               |
| 39 | Burkina Faso    | 6.79 (5.57 to | 7.81 (6.46 to | 0.59 (0.41 to | 0.61 (0.37 to | 0.67 (0.38 to | 0.56 (0.28 to | 21.41 (10.66 | 22.52 (12.05  | 0.38 (0.15 to |
| 40 |                 | 8.47)         | 9.56)         | 0.77)         | 0.89)         | 1.00)         | 0.85)         | to 33.67)    | to 34.80)     | 0.62)         |
| 41 | Burundi         | 6.12 (5.03 to | 6.13 (5.06 to | -0.09 (-0.19  | 0.69 (0.45 to | 0.73 (0.46 to | 0.15 (-0.07   | 22.15 (14.22 | 20.85 (13.56  | -0.20 (-0.42  |
| 42 |                 | 7.50)         | 7.50)         | to 0.01)      | 1.02)         | 1.16)         | to 0.37)      | to 36.56)    | to 32.18)     | to 0.03)      |
| 43 |                 |               |               |               |               |               |               |              |               |               |
| 44 | Cabo Verde      | 10.12 (8.33   | 12.18 (9.88   | 0.76 (0.65 to | 0.33 (0.20 to | 0.25 (0.19 to | -2.05 (-2.56  | 12.86 (8.37  | 8.69 (6.98 to | -2.12 (-2.50  |
| 45 |                 | to 12.38)     | to 14.93)     | 0.88)         | 0.46)         | 0.33)         | to -1.54)     | to 17.33)    | 10.77)        | to -1.74)     |
| 46 |                 |               |               |               |               |               |               |              |               |               |
| 47 | Cambodia        | 3.02 (2.34 to | 3.77 (3.01 to | 0.65 (0.57 to | 0.50 (0.27 to | 0.35 (0.23 to | -1.44 (-1.54  | 14.51 (8.27  | 8.98 (6.42 to | -1.86 (-1.96  |
| 48 |                 | 3.74)         | 4.61)         | 0.72)         | 0.71)         | 0.45)         | to -1.34)     | to 21.45)    | 11.33)        | to -1.77)     |
| 49 | Cameroon        | 8.34 (6.88 to | 10.13 (8.33   | 0.79 (0.68 to | 0.54 (0.29 to | 0.38 (0.21 to | -1.69 (-1.94  | 18.12 (9.17  | 13.36 (7.77   | -1.43 (-1.66  |
| 50 |                 | 10.38)        | to 12.46)     | 0.90)         | 0.88)         | 0.59)         | to -1.43)     | to 27.57)    | to 21.03)     | to -1.20)     |
| 51 |                 |               |               |               |               |               |               |              |               |               |
| 52 | Canada          | 382.53        | 357.73        | 0.13 (-0.03   | 0.87 (0.77 to | 0.56 (0.46 to | -2.43 (-3.11  | 74.34 (56.49 | 64.91 (46.59  | -0.31 (-0.41  |
| 53 |                 | (367.54 to    | (323.05 to    | to 0.28)      | 0.97)         | 0.82)         | to -1.75)     | to 95.45)    | to 85.11)     | to -0.21)     |
| 54 |                 | 397.57)       | 393.88)       |               |               |               |               |              |               |               |
| 55 | Central African | 6.56 (5.39 to | 6.92 (5.75 to | 0.16 (0.14 to | 0.86 (0.55 to | 0.86 (0.53 to | 0.02 (-0.06   | 26.29 (16.24 | 25.47 (14.87  | -0.07 (-0.13  |
| 56 | Republic        | 8.20)         | 8.49)         | 0.18)         | 1.38)         | 1.36)         | to 0.10)      | to 42.90)    | to 41.50)     | to 0.00)      |
| 57 |                 |               |               |               |               |               |               |              |               |               |
| 58 | Chad            | 6.92 (5.73 to | 8.10 (6.65 to | 0.68 (0.57 to | 0.58 (0.32 to | 0.58 (0.39 to | -0.24 (-0.45  | 20.08 (9.86  | 19.16 (11.97  | -0.36 (-0.55  |
| 59 |                 | 8.53)         | 9.90)         | 0.80)         | 0.98)         | 0.84)         | to -0.04)     | to 32.61)    | to 27.44)     | to -0.16)     |
| 60 |                 |               |               |               |               |               |               |              |               |               |

|    |                 |                           |                           |                        |                     |                     |                        |                        |                        |                        |
|----|-----------------|---------------------------|---------------------------|------------------------|---------------------|---------------------|------------------------|------------------------|------------------------|------------------------|
| 1  |                 |                           |                           |                        |                     |                     |                        |                        |                        |                        |
| 2  |                 |                           |                           |                        |                     |                     |                        |                        |                        |                        |
| 3  |                 |                           |                           |                        |                     |                     |                        |                        |                        |                        |
| 4  | Chile           | 30.30 (25.82 to 35.36)    | 31.66 (27.25 to 36.7)     | 0.29 (-0.09 to 0.67)   | 0.46 (0.37 to 0.51) | 0.30 (0.26 to 0.38) | -1.75 (-2.10 to -1.40) | 16.52 (13.59 to 19.03) | 11.96 (9.91 to 14.48)  | -1.10 (-1.28 to -0.91) |
| 6  | China           | 22.85 (18.98 to 27.15)    | 47.06 (40.05 to 54.99)    | 2.80 (2.41 to 3.19)    | 0.86 (0.59 to 1.16) | 0.30 (0.24 to 0.35) | -4.11 (-4.50 to -3.71) | 24.47 (17.88 to 30.19) | 13.1 (10.29 to 16.31)  | -2.36 (-2.54 to -2.18) |
| 9  | Colombia        | 29.55 (24.81 to 34.95)    | 29.36 (24.89 to 34.88)    | -0.04 (-0.07 to -0.01) | 0.28 (0.25 to 0.31) | 0.29 (0.22 to 0.38) | 0.75 (0.38 to 1.12)    | 12.89 (10.91 to 15.21) | 12.53 (9.75 to 15.57)  | 0.36 (0.12 to 0.60)    |
| 12 | Comoros         | 7.33 (6.01 to 9.00)       | 7.78 (6.38 to 9.69)       | 0.36 (0.24 to 0.48)    | 0.83 (0.43 to 1.44) | 0.75 (0.48 to 1.19) | -0.51 (-0.67 to -0.36) | 23.44 (10.67 to 39.49) | 20.58 (13.10 to 30.54) | -0.63 (-0.84 to -0.41) |
| 14 | Congo           | 9.67 (7.93 to 11.87)      | 10.38 (8.57 to 12.74)     | 0.30 (0.16 to 0.45)    | 0.79 (0.56 to 1.16) | 0.66 (0.47 to 0.93) | -0.58 (-0.75 to -0.41) | 23.58 (16.35 to 34.61) | 18.36 (13.15 to 25.90) | -0.82 (-0.99 to -0.66) |
| 17 | Cook Islands    | 6.37 (5.18 to 7.65)       | 6.17 (5.09 to 7.51)       | -0.21 (-0.35 to -0.06) | 1.64 (1.17 to 2.20) | 0.81 (0.53 to 1.11) | -2.70 (-2.90 to -2.50) | 50.74 (35.37 to 72.08) | 24.94 (15.58 to 36.18) | -2.70 (-2.88 to -2.51) |
| 19 | Costa Rica      | 30.77 (25.88 to 36.60)    | 31.40 (26.47 to 37.15)    | 0.04 (0.03 to 0.05)    | 0.14 (0.12 to 0.16) | 0.20 (0.14 to 0.26) | 1.04 (0.82 to 1.26)    | 8.60 (6.81 to 10.81)   | 10.14 (7.74 to 12.91)  | 0.58 (0.47 to 0.69)    |
| 22 | Côte d'Ivoire   | 8.08 (6.58 to 9.97)       | 8.70 (7.15 to 10.96)      | 0.43 (0.34 to 0.52)    | 0.46 (0.23 to 0.80) | 0.40 (0.26 to 0.58) | -0.71 (-0.97 to -0.45) | 15.45 (7.59 to 24.88)  | 13.59 (8.56 to 19.48)  | -0.63 (-0.86 to -0.40) |
| 25 | Croatia         | 166.42 (155.48 to 178.41) | 203.79 (188.71 to 220.14) | 0.64 (0.57 to 0.70)    | 0.28 (0.24 to 0.42) | 0.41 (0.30 to 0.52) | 1.79 (1.42 to 2.17)    | 33.08 (24.90 to 42.82) | 41.30 (30.43 to 53.17) | 0.79 (0.65 to 0.93)    |
| 28 | Cuba            | 30.31 (25.30 to 36.52)    | 29.25 (23.94 to 35.26)    | -0.01 (-0.07 to 0.06)  | 0.35 (0.23 to 0.42) | 0.23 (0.18 to 0.29) | -2.04 (-2.48 to -1.60) | 14.22 (10.70 to 16.97) | 10.45 (8.37 to 12.94)  | -1.38 (-1.64 to -1.12) |
| 31 | Cyprus          | 42.09 (35.82 to 49.01)    | 58.44 (53.02 to 63.85)    | 0.98 (0.85 to 1.11)    | 2.09 (1.24 to 3.02) | 1.00 (0.76 to 1.32) | -3.13 (-3.45 to -2.81) | 36.43 (25.10 to 47.83) | 22.06 (17.95 to 26.41) | -2.26 (-2.48 to -2.03) |
| 34 | Czechia         | 85.23 (71.89 to 102.44)   | 152.02 (139.69 to 164.49) | 1.52 (1.33 to 1.71)    | 0.54 (0.49 to 0.63) | 0.56 (0.42 to 0.69) | 0.80 (0.45 to 1.15)    | 26.65 (21.98 to 32.43) | 35.40 (27.15 to 44.74) | 0.98 (0.90 to 1.06)    |
| 37 | Democratic      |                           |                           |                        |                     |                     |                        |                        |                        |                        |
| 38 | People's        |                           |                           |                        |                     |                     |                        |                        |                        |                        |
| 39 | Republic of     | 15.93 (13.23 to 19.03)    | 15.61 (12.96 to 18.71)    | -0.13 (-0.21 to -0.06) | 0.57 (0.33 to 0.82) | 0.41 (0.28 to 0.59) | -1.10 (-1.20 to -1.00) | 17.24 (9.70 to 27.63)  | 11.10 (8.17 to 14.58)  | -1.31 (-1.41 to -1.21) |
| 41 | Korea           |                           |                           |                        |                     |                     |                        |                        |                        |                        |
| 42 | Democratic      |                           |                           |                        |                     |                     |                        |                        |                        |                        |
| 43 | Republic of the | 8.50 (6.93 to 10.44)      | 7.80 (6.41 to 9.73)       | -0.45 (-0.71 to -0.20) | 0.71 (0.50 to 1.02) | 0.57 (0.40 to 0.82) | -0.78 (-0.91 to -0.64) | 21.69 (14.31 to 32.28) | 17.22 (12.20 to 24.09) | -0.82 (-0.97 to -0.66) |
| 44 | Congo           |                           |                           |                        |                     |                     |                        |                        |                        |                        |
| 46 |                 | 232.13 (210.74 to 255.89) | 227.82 (208.42 to 250.75) | 0.47 (0.29 to 0.65)    | 0.53 (0.48 to 0.62) | 0.59 (0.50 to 0.68) | 0.01 (-0.61 to 0.63)   | 46.68 (35.05 to 59.60) | 45.17 (34.12 to 58.06) | 0.13 (-0.02 to 0.29)   |
| 47 | Denmark         |                           |                           |                        |                     |                     |                        |                        |                        |                        |
| 49 |                 |                           |                           |                        |                     |                     |                        |                        |                        |                        |
| 50 | Djibouti        | 7.12 (5.93 to 8.73)       | 9.07 (7.45 to 11.07)      | 1.24 (1.04 to 1.45)    | 0.60 (0.37 to 1.07) | 0.54 (0.36 to 0.89) | -0.56 (-0.67 to -0.45) | 18.05 (10.87 to 32.37) | 15.83 (10.31 to 24.84) | -0.67 (-0.82 to -0.53) |
| 52 |                 |                           |                           |                        |                     |                     |                        |                        |                        |                        |
| 53 | Dominica        | 29.23 (24.60 to 35.45)    | 27.29 (22.61 to 33.47)    | -0.12 (-0.18 to -0.07) | 1.01 (0.79 to 1.23) | 0.76 (0.57 to 1.02) | -1.20 (-1.28 to -1.12) | 34.22 (27.47 to 41.24) | 26 (20.19 to 34.33)    | -1.17 (-1.27 to -1.07) |
| 54 |                 |                           |                           |                        |                     |                     |                        |                        |                        |                        |
| 55 | Dominican       | 25.16 (20.80 to 30.54)    | 24.19 (19.90 to 29.50)    | 0.16 (0.01 to 0.32)    | 0.24 (0.19 to 0.31) | 0.24 (0.17 to 0.32) | 0.09 (-0.13 to 0.32)   | 12.08 (9.46 to 15.94)  | 10.73 (7.96 to 13.99)  | -0.27 (-0.50 to -0.04) |
| 56 | Republic        |                           |                           |                        |                     |                     |                        |                        |                        |                        |
| 57 |                 |                           |                           |                        |                     |                     |                        |                        |                        |                        |
| 58 | Ecuador         | 17.02 (15.04 to 19.21)    | 19.97 (17.98 to 22.11)    | 0.49 (0.39 to 0.59)    | 0.23 (0.18 to 0.31) | 0.23 (0.17 to 0.30) | 0.55 (-0.03 to 1.13)   | 10.90 (8.22 to 13.94)  | 9.02 (6.84 to 11.09)   | -0.33 (-0.74 to 0.08)  |
| 59 |                 |                           |                           |                        |                     |                     |                        |                        |                        |                        |
| 60 |                 |                           |                           |                        |                     |                     |                        |                        |                        |                        |

|    |                   |                           |                           |                        |                     |                     |                        |                        |                        |                        |
|----|-------------------|---------------------------|---------------------------|------------------------|---------------------|---------------------|------------------------|------------------------|------------------------|------------------------|
| 1  |                   |                           |                           |                        |                     |                     |                        |                        |                        |                        |
| 2  |                   |                           |                           |                        |                     |                     |                        |                        |                        |                        |
| 3  |                   |                           |                           |                        |                     |                     |                        |                        |                        |                        |
| 4  | Egypt             | 39.84 (33.94 to 46.00)    | 44.48 (36.34 to 55.00)    | 0.26 (0.20 to 0.32)    | 0.22 (0.13 to 0.47) | 0.21 (0.12 to 0.35) | 0.32 (0.07 to 0.56)    | 11.25 (7.91 to 16.51)  | 11.49 (8.21 to 15.51)  | 0.19 (0.10 to 0.27)    |
| 6  | El Salvador       | 23.89 (19.87 to 28.45)    | 24.71 (20.64 to 29.14)    | 0.12 (0.05 to 0.19)    | 0.36 (0.23 to 0.45) | 0.14 (0.11 to 0.20) | -3.87 (-4.22 to -3.52) | 15.07 (11.16 to 18.78) | 7.25 (5.45 to 9.54)    | -2.87 (-3.18 to -2.56) |
| 9  | Equatorial Guinea | 7.11 (5.84 to 8.80)       | 10.89 (9.04 to 13.36)     | 1.66 (1.48 to 1.85)    | 0.76 (0.44 to 1.28) | 0.54 (0.33 to 0.86) | -1.45 (-1.60 to -1.30) | 23.13 (13.07 to 37.98) | 14.77 (9.26 to 22.66)  | -1.89 (-2.04 to -1.73) |
| 12 | Eritrea           | 6.35 (5.28 to 7.85)       | 6.98 (5.79 to 8.43)       | 0.26 (0.21 to 0.32)    | 0.61 (0.39 to 0.96) | 0.77 (0.52 to 1.12) | 0.71 (0.52 to 0.89)    | 20.05 (11.19 to 34.57) | 22.27 (15.26 to 32.30) | 0.34 (0.20 to 0.49)    |
| 15 | Estonia           | 71.59 (62.77 to 81.41)    | 103.71 (90.72 to 118.15)  | 1.12 (0.91 to 1.32)    | 0.55 (0.46 to 0.61) | 0.34 (0.26 to 0.47) | -2.35 (-2.68 to -2.02) | 28.55 (23.60 to 33.59) | 24.50 (18.49 to 31.62) | -1.07 (-1.32 to -0.81) |
| 18 | Eswatini          | 8.30 (6.84 to 10.21)      | 9.49 (7.76 to 11.68)      | 0.49 (0.39 to 0.58)    | 0.55 (0.33 to 0.83) | 0.60 (0.42 to 0.83) | 0.53 (0.14 to 0.91)    | 17.33 (9.97 to 26.06)  | 17.93 (12.43 to 25.37) | 0.38 (0.14 to 0.63)    |
| 21 | Ethiopia          | 5.88 (4.90 to 7.15)       | 6.78 (5.64 to 8.29)       | 0.53 (0.48 to 0.59)    | 0.84 (0.59 to 1.34) | 0.72 (0.42 to 1.07) | -0.67 (-0.82 to -0.52) | 26.74 (17.05 to 45.16) | 19.04 (11.93 to 28.10) | -1.33 (-1.48 to -1.18) |
| 23 | Fiji              | 4.78 (3.90 to 5.75)       | 4.70 (3.85 to 5.71)       | -0.12 (-0.34 to 0.09)  | 0.35 (0.26 to 0.45) | 0.26 (0.19 to 0.34) | -1.16 (-1.28 to -1.03) | 10.67 (8.31 to 13.70)  | 8.17 (5.94 to 10.77)   | -1.08 (-1.21 to -0.95) |
| 26 | Finland           | 162.00 (150.44 to 173.8)  | 286.76 (256.44 to 318.38) | 1.86 (1.78 to 1.94)    | 0.47 (0.35 to 0.55) | 0.29 (0.25 to 0.34) | -2.22 (-2.47 to -1.96) | 33.34 (25.19 to 43.04) | 47.57 (33.68 to 63.99) | 1.06 (0.98 to 1.14)    |
| 30 | France            | 96.03 (87.62 to 104.59)   | 136.71 (123.31 to 151.14) | 1.43 (1.34 to 1.53)    | 1.08 (0.93 to 1.20) | 1.21 (0.73 to 1.42) | 0.74 (0.46 to 1.02)    | 31.92 (26.78 to 37.48) | 39.44 (31.13 to 48.47) | 1.07 (0.94 to 1.20)    |
| 33 | Gabon             | 9.49 (7.90 to 11.62)      | 11.27 (9.27 to 13.92)     | 0.53 (0.51 to 0.56)    | 0.61 (0.41 to 0.96) | 0.53 (0.38 to 0.76) | -0.49 (-0.70 to -0.28) | 18.69 (12.11 to 28.60) | 15.27 (10.62 to 21.51) | -0.71 (-0.88 to -0.54) |
| 36 | Gambia            | 8.70 (7.11 to 10.56)      | 8.81 (7.23 to 10.96)      | -0.10 (-0.21 to 0.01)  | 0.58 (0.34 to 0.92) | 0.44 (0.29 to 0.60) | -1.52 (-1.81 to -1.24) | 19.12 (10.73 to 31.19) | 14.25 (9.59 to 19.10)  | -1.56 (-1.85 to -1.28) |
| 39 | Georgia           | 84.45 (71.53 to 99.72)    | 87.97 (73.75 to 104.83)   | 0.15 (0.08 to 0.22)    | 0.29 (0.18 to 0.39) | 0.29 (0.19 to 0.37) | 0.18 (-1.12 to 1.50)   | 20.37 (15.24 to 26.41) | 20.25 (15.35 to 26.28) | 0.02 (-0.38 to 0.41)   |
| 42 | Germany           | 104.26 (89.74 to 121.91)  | 214.93 (188.62 to 243.64) | 1.09 (0.54 to 1.64)    | 0.96 (0.79 to 1.60) | 1.94 (1.46 to 2.20) | 3.73 (3.26 to 4.20)    | 35.51 (28.44 to 47.28) | 64.06 (51.49 to 77.71) | 1.80 (1.57 to 2.02)    |
| 45 | Ghana             | 10.54 (8.69 to 12.71)     | 12.26 (10.11 to 14.88)    | 0.73 (0.63 to 0.83)    | 0.70 (0.35 to 1.24) | 0.55 (0.31 to 0.82) | -0.97 (-1.23 to -0.70) | 24.11 (11.81 to 39.44) | 18.5 (10.85 to 26.95)  | -1.02 (-1.27 to -0.77) |
| 48 | Greece            | 97.92 (82.43 to 113.83)   | 78.66 (70.88 to 87.04)    | -0.98 (-1.20 to -0.75) | 0.26 (0.22 to 0.30) | 0.23 (0.19 to 0.27) | -0.36 (-0.92 to 0.20)  | 19.2 (14.17 to 25.49)  | 15.88 (11.92 to 20.55) | -0.78 (-0.85 to -0.71) |
| 51 | Greenland         | 144.67 (122.01 to 170.01) | 163.39 (138.74 to 188.49) | 0.34 (0.27 to 0.40)    | 0.57 (0.45 to 0.71) | 0.74 (0.38 to 0.96) | 1.07 (0.80 to 1.34)    | 34.12 (26.01 to 44.17) | 38.3 (28.36 to 50.15)  | 0.36 (0.24 to 0.47)    |
| 54 | Grenada           | 24.13 (19.74 to 29.02)    | 24.31 (20.03 to 30.13)    | 0.03 (-0.05 to 0.12)   | 1.34 (1.06 to 1.62) | 1.24 (1.03 to 1.52) | -0.55 (-0.68 to -0.41) | 44.27 (36.58 to 52.74) | 38.43 (32.58 to 46.61) | -0.64 (-0.73 to -0.56) |
| 57 | Guam              | 6.83 (5.65 to 8.11)       | 6.54 (5.35 to 7.82)       | -0.18 (-0.35 to -0.01) | 0.33 (0.26 to 0.42) | 0.16 (0.12 to 0.23) | -3.00 (-3.55 to -2.45) | 9.01 (7.19 to 11.32)   | 5.39 (4.11 to 7.68)    | -2.12 (-2.65 to -1.59) |
| 59 | Guatemala         | 21.60 (18.10 to 24.10)    | 23.54 (19.84 to 27.24)    | 0.29 (0.25 to 0.33)    | 0.25 (0.18 to 0.32) | 0.29 (0.22 to 0.36) | 1.32 (0.72 to 1.92)    | 11.81 (8.36 to 15.26)  | 11.99 (9.52 to 14.46)  | 0.71 (0.18 to 1.24)    |
| 60 |                   |                           |                           |                        |                     |                     |                        |                        |                        |                        |



|    |               |               |               |               |               |               |               |               |              |               |
|----|---------------|---------------|---------------|---------------|---------------|---------------|---------------|---------------|--------------|---------------|
| 1  |               |               |               |               |               |               |               |               |              |               |
| 2  |               |               |               |               |               |               |               |               |              |               |
| 3  |               | to 26.13)     | to 28.11)     | 0.32)         | 0.38)         | 0.37)         | 1.92)         | to 18.2)      | to 14.91)    | 1.24)         |
| 4  |               | 7.53 (6.18 to | 8.61 (7.06 to | 0.61 (0.49 to | 0.43 (0.18 to | 0.40 (0.21 to | -0.36 (-0.50  | 16.9 (6.31 to | 14.41 (7.36  | -0.58 (-0.70  |
| 5  | Guinea        | 9.35)         | 10.53)        | 0.74)         | 0.86)         | 0.60)         | to -0.22)     | 29.14)        | to 21.95)    | to -0.47)     |
| 6  |               | 7.32 (5.99 to | 8.43 (6.92 to | 0.63 (0.50 to | 0.75 (0.36 to | 0.61 (0.4 to  | -0.81 (-0.93  | 26.39 (11.34  | 20.54 (12.76 | -0.94 (-1.07  |
| 7  | Guinea-Bissau | 9.06)         | 10.32)        | 0.76)         | 1.18)         | 0.85)         | to -0.68)     | to 44.49)     | to 28.9)     | to -0.80)     |
| 8  |               | 23.56 (19.43  | 22.95 (18.93  | 0.06 (-0.03   | 1.19 (0.97 to | 1.02 (0.76 to | -0.53 (-0.70  | 40.69 (32.87  | 35.43 (26.51 | -0.46 (-0.59  |
| 9  | Guyana        | to 28.53)     | to 28.26)     | to 0.15)      | 1.41)         | 1.33)         | to -0.35)     | to 48.37)     | to 46.07)    | to -0.32)     |
| 10 |               | 20.11 (16.54  | 19.43 (16.14  | 0.07 (-0.03   | 1.41 (0.74 to | 1.08 (0.61 to | -0.77 (-0.89  | 52.02 (22.41  | 36.86 (19.94 | -0.94 (-1.12  |
| 11 | Haiti         | to 24.88)     | to 24.31)     | to 0.17)      | 2.12)         | 1.59)         | to -0.65)     | to 92.43)     | to 54.22)    | to -0.77)     |
| 12 |               | 22.83 (18.97  | 23.93 (19.84  | 0.18 (0.14 to | 0.72 (0.46 to | 0.83 (0.51 to | 0.87 (0.73 to | 28.54 (19.06  | 24.37 (15.88 | -0.38 (-0.43  |
| 13 | Honduras      | to 27.11)     | to 28.49)     | 0.23)         | 0.99)         | 1.15)         | 1.02)         | to 38.67)     | to 32.67)    | to -0.32)     |
| 14 |               | 199.20        | 332.82        | 2.13 (1.78 to | 0.64 (0.58 to | 0.56 (0.45 to | -0.62 (-1.04  | 48.33 (38.31  | 64.34 (47.69 | 1.15 (0.85 to |
| 15 | Hungary       | (181.71 to    | (309.79 to    | 2.48)         | 0.82)         | 0.71)         | to -0.20)     | to 59.55)     | to 82.55)    | 1.46)         |
| 16 |               | 219.68)       | 356.72)       |               |               |               |               |               |              |               |
| 17 |               | 136.42        | 210.18        | 0.84 (0.59 to | 0.67 (0.57 to | 0.65 (0.51 to | 0.14 (-0.01   | 33.49 (26.34  | 42.38 (31.83 | 0.47 (0.33 to |
| 18 | Iceland       | (115.41 to    | (180.43 to    | 1.09)         | 0.78)         | 0.75)         | to 0.29)      | to 42.36)     | to 54.83)    | 0.62)         |
| 19 |               | 161.21)       | 243.51)       |               |               |               |               |               |              |               |
| 20 |               | 20.68 (16.76  | 20.34 (16.57  | 0.18 (-0.03   | 0.63 (0.43 to | 0.40 (0.29 to | -1.93 (-2.11  | 20.11 (13.58  | 13.04 (9.44  | -1.73 (-1.86  |
| 21 | India         | to 25.67)     | to 24.97)     | to 0.38)      | 0.91)         | 0.53)         | to -1.74)     | to 26.72)     | to 16.5)     | to -1.61)     |
| 22 |               | 3.37 (2.70 to | 4.16 (3.37 to | 0.74 (0.60 to | 0.77 (0.37 to | 0.55 (0.33 to | -1.42 (-1.56  | 19.48 (11.70  | 11.66 (8.16  | -2.04 (-2.17  |
| 23 | Indonesia     | 4.07)         | 5.00)         | 0.88)         | 1.04)         | 0.70)         | to -1.29)     | to 24.6)      | to 14.98)    | to -1.91)     |
| 24 |               | 41.07 (33.51  | 44.80 (36.70  | 0.29 (0.02 to | 0.22 (0.12 to | 0.19 (0.08 to | -0.11 (-0.64  | 11.09 (8.34   | 11.03 (7.60  | 0.12 (-0.02   |
| 25 | Iran (Islamic | to 50.84)     | to 55.07)     | 0.57)         | 0.34)         | 0.24)         | to 0.42)      | to 14.22)     | to 14.22)    | to 0.25)      |
| 26 | Republic of)  | 19.71 (16.52  | 28.11 (23.22  | 1.43 (1.27 to | 0.29 (0.20 to | 0.19 (0.15 to | -1.58 (-1.76  | 13.75 (9.61   | 10.42 (8.08  | -0.96 (-1.14  |
| 27 | Iraq          | to 23.39)     | to 34.20)     | 1.59)         | 0.42)         | 0.27)         | to -1.39)     | to 19.18)     | to 13.32)    | to -0.78)     |
| 28 |               | 90.59 (75.89  | 97.87 (84.83  | 0.42 (0.35 to | 0.87 (0.76 to | 0.66 (0.53 to | -1.61 (-2.56  | 29.44 (24.40  | 25.50 (20.1  | -0.80 (-1.30  |
| 29 | Ireland       | to 107.72)    | to 112.53)    | 0.49)         | 0.96)         | 0.84)         | to -0.66)     | to 35.63)     | to 32.09)    | to -0.30)     |
| 30 |               | 70.49 (59.79  | 70.21 (62.42  | -0.08 (-0.20  | 0.47 (0.41 to | 0.38 (0.32 to | -1.01 (-1.36  | 21.15 (17.17  | 18.50 (14.69 | -0.65 (-0.76  |
| 31 | Israel        | to 83.85)     | to 78.72)     | to 0.05)      | 0.53)         | 0.51)         | to -0.66)     | to 26.12)     | to 23.20)    | to -0.54)     |
| 32 |               | 261.58        | 227.51        | -0.24 (-0.43  | 0.44 (0.39 to | 0.76 (0.55 to | 2.55 (2.03 to | 49.44 (36.73  | 46.95 (35.41 | 0.17 (0.00 to |
| 33 | Italy         | (226.94 to    | (200.83 to    | to -0.05)     | 0.70)         | 0.85)         | 3.06)         | to 63.71)     | to 59.78)    | 0.34)         |
| 34 |               | 297.14)       | 254.27)       |               |               |               |               |               |              |               |
| 35 |               | 29.63 (24.88  | 29.42 (24.46  | 0.15 (0.05 to | 0.30 (0.23 to | 0.24 (0.17 to | -1.45 (-1.78  | 14.86 (11.53  | 11.50 (8.84  | -1.28 (-1.50  |
| 36 | Jamaica       | to 35.60)     | to 35.27)     | 0.25)         | 0.35)         | 0.33)         | to -1.12)     | to 17.70)     | to 14.50)    | to -1.06)     |
| 37 |               | 151.17        | 291.90        | 1.48 (1.08 to | 0.25 (0.18 to | 0.11 (0.09 to | -2.39 (-2.83  | 27.14 (19.46  | 46.58 (31.41 | 1.21 (0.88 to |
| 38 | Japan         | (125.74 to    | (251.75 to    | 1.88)         | 0.27)         | 0.16)         | to -1.95)     | to 36.26)     | to 63.54)    | 1.54)         |
| 39 |               | 179.69)       | 336.57)       |               |               |               |               |               |              |               |
| 40 |               | 69.20 (60.07  | 113.51        | 2.51 (2.23 to | 0.43 (0.30 to | 0.23 (0.18 to | -2.62 (-2.98  | 20.68 (15.47  | 22.01 (16.06 | 0.46 (0.34 to |
| 41 | Jordan        | to 79.85)     | (95.78 to     | 2.79)         | 0.59)         | 0.30)         | to -2.26)     | to 26.15)     | to 29.65)    | 0.58)         |
| 42 |               |               | 133.87)       |               |               |               |               |               |              |               |
| 43 |               | 80.02 (67.16  | 81.77 (68.13  | 0.12 (0.06 to | 0.57 (0.41 to | 0.46 (0.37 to | -1.26 (-1.68  | 30.23 (24.06  | 26.97 (21.78 | -0.74 (-1.02  |
| 44 | Kazakhstan    | to 96.26)     | to 97.46)     | 0.18)         | 0.72)         | 0.56)         | to -0.85)     | to 37.42)     | to 33.61)    | to -0.45)     |
| 45 |               | 6.80 (5.68 to | 8.33 (6.99 to | 0.31 (0.19 to | 0.81 (0.43 to | 0.84 (0.50 to | 0.31 (0.22 to | 21.25 (13.20  | 21.31 (13.76 | 0.26 (0.16 to |
| 46 | Kenya         | 8.23)         | 10.12)        | 0.42)         | 1.44)         | 1.26)         | 0.40)         | to 36.93)     | to 30.78)    | 0.36)         |
| 47 |               |               |               |               |               |               |               |               |              |               |
| 48 |               |               |               |               |               |               |               |               |              |               |
| 49 |               |               |               |               |               |               |               |               |              |               |
| 50 |               |               |               |               |               |               |               |               |              |               |
| 51 |               |               |               |               |               |               |               |               |              |               |
| 52 |               |               |               |               |               |               |               |               |              |               |
| 53 |               |               |               |               |               |               |               |               |              |               |
| 54 |               |               |               |               |               |               |               |               |              |               |
| 55 |               |               |               |               |               |               |               |               |              |               |
| 56 |               |               |               |               |               |               |               |               |              |               |
| 57 |               |               |               |               |               |               |               |               |              |               |
| 58 |               |               |               |               |               |               |               |               |              |               |
| 59 |               |               |               |               |               |               |               |               |              |               |
| 60 |               |               |               |               |               |               |               |               |              |               |



|    |                                  |                           |                           |                        |                     |                     |                        |                        |                        |                        |
|----|----------------------------------|---------------------------|---------------------------|------------------------|---------------------|---------------------|------------------------|------------------------|------------------------|------------------------|
| 1  |                                  |                           |                           |                        |                     |                     |                        |                        |                        |                        |
| 2  |                                  |                           |                           |                        |                     |                     |                        |                        |                        |                        |
| 3  |                                  |                           |                           |                        |                     |                     |                        |                        |                        |                        |
| 4  | Kiribati                         | 4.05 (3.25 to 4.96)       | 3.55 (2.90 to 4.32)       | -0.69 (-0.88 to -0.51) | 1.81 (0.99 to 2.71) | 1.08 (0.68 to 1.67) | -2.13 (-2.29 to -1.98) | 53.42 (24.47 to 92.59) | 31.83 (17.58 to 55.40) | -2.07 (-2.20 to -1.93) |
| 6  | Kuwait                           | 55.67 (51.70 to 60.02)    | 54.34 (45.07 to 65.64)    | 0.09 (-0.06 to 0.25)   | 0.19 (0.14 to 0.22) | 0.15 (0.12 to 0.20) | -0.66 (-1.06 to -0.25) | 13.39 (10.47 to 16.77) | 11.73 (8.74 to 15.53)  | -0.33 (-0.50 to -0.15) |
| 9  | Kyrgyzstan                       | 73.48 (61.75 to 87.12)    | 73.31 (61.61 to 87.09)    | -0.03 (-0.10 to 0.04)  | 0.42 (0.29 to 0.50) | 0.19 (0.16 to 0.25) | -3.52 (-3.86 to -3.19) | 28 (21.04 to 34.06)    | 17.37 (13.34 to 22.37) | -2.11 (-2.28 to -1.94) |
| 11 | Lao People's Democratic Republic | 2.98 (2.32 to 3.69)       | 3.67 (2.95 to 4.55)       | 0.79 (0.74 to 0.83)    | 0.45 (0.22 to 0.72) | 0.26 (0.14 to 0.41) | -2.40 (-2.60 to -2.19) | 13.04 (6.62 to 19.19)  | 6.97 (4.13 to 11.24)   | -2.47 (-2.65 to -2.30) |
| 16 | Latvia                           | 103.47 (89.32 to 119.13)  | 123.78 (108.48 to 139.23) | 0.42 (0.33 to 0.50)    | 0.34 (0.29 to 0.42) | 0.37 (0.30 to 0.48) | 0.22 (-0.08 to 0.51)   | 25.74 (20.10 to 32.35) | 28.66 (21.84 to 36.61) | 0.14 (-0.02 to 0.29)   |
| 19 | Lebanon                          | 33.16 (27.13 to 41.07)    | 46.20 (37.84 to 56.68)    | 1.23 (1.00 to 1.47)    | 0.14 (0.10 to 0.21) | 0.15 (0.08 to 0.23) | 0.32 (0.10 to 0.55)    | 8.48 (6.32 to 11.24)   | 10.18 (7.34 to 13.75)  | 0.79 (0.65 to 0.93)    |
| 22 | Lesotho                          | 7.67 (6.36 to 9.34)       | 8.77 (7.23 to 10.83)      | 0.48 (0.40 to 0.57)    | 0.55 (0.36 to 0.8)  | 0.69 (0.48 to 0.98) | 1.08 (0.85 to 1.31)    | 16.56 (10.77 to 23.28) | 20.29 (13.61 to 29.06) | 1.06 (0.87 to 1.26)    |
| 24 | Liberia                          | 7.84 (6.42 to 9.75)       | 8.46 (6.99 to 10.34)      | 0.57 (0.33 to 0.80)    | 0.52 (0.23 to 0.92) | 0.42 (0.26 to 0.62) | -0.84 (-1.09 to -0.60) | 19.69 (7.54 to 32.92)  | 13.96 (8.48 to 21.59)  | -1.16 (-1.44 to -0.88) |
| 27 | Libya                            | 23.56 (19.39 to 28.73)    | 25.77 (21.21 to 31.41)    | 0.56 (0.29 to 0.84)    | 0.21 (0.13 to 0.37) | 0.22 (0.15 to 0.31) | 0.11 (-0.02 to 0.24)   | 8.88 (6.41 to 12.85)   | 9.05 (6.69 to 11.82)   | 0.21 (0.11 to 0.31)    |
| 30 | Lithuania                        | 109.21 (95.7 to 123.65)   | 133.41 (123.84 to 142.65) | 0.84 (0.76 to 0.92)    | 0.32 (0.24 to 0.37) | 0.33 (0.26 to 0.42) | 0.13 (-0.20 to 0.47)   | 25.36 (19.61 to 31.92) | 28.75 (21.98 to 36.27) | 0.49 (0.33 to 0.65)    |
| 34 | Luxembourg                       | 166.34 (145.24 to 189.85) | 187.63 (163.86 to 213.76) | 0.37 (0.22 to 0.53)    | 0.96 (0.84 to 1.10) | 0.97 (0.72 to 1.16) | 0.55 (0.30 to 0.80)    | 42.53 (33.57 to 52.29) | 43.90 (33.95 to 55.68) | 0.27 (0.15 to 0.38)    |
| 37 | Madagascar                       | 6.62 (5.44 to 8.22)       | 7.25 (5.99 to 9.04)       | 0.38 (0.29 to 0.48)    | 0.53 (0.32 to 0.88) | 0.59 (0.40 to 0.88) | 0.45 (0.34 to 0.56)    | 17.91 (8.95 to 28.15)  | 16.98 (11.97 to 24.64) | -0.03 (-0.18 to 0.13)  |
| 40 | Malawi                           | 5.73 (4.70 to 7.05)       | 6.33 (5.28 to 7.8)        | 0.44 (0.40 to 0.48)    | 0.71 (0.49 to 1.02) | 0.67 (0.46 to 0.97) | -0.26 (-0.39 to -0.12) | 24.10 (13.49 to 42.83) | 19.08 (13.47 to 26.73) | -0.85 (-1.02 to -0.69) |
| 43 | Malaysia                         | 4.33 (3.64 to 5.05)       | 6.56 (5.71 to 7.56)       | 1.38 (1.19 to 1.57)    | 0.18 (0.14 to 0.22) | 0.17 (0.12 to 0.23) | -0.75 (-1.06 to -0.43) | 5.01 (4.15 to 6.10)    | 4.92 (3.71 to 6.26)    | -0.54 (-0.73 to -0.35) |
| 45 | Maldives                         | 4.10 (3.25 to 4.98)       | 4.94 (3.96 to 5.96)       | 0.74 (0.68 to 0.80)    | 0.53 (0.32 to 0.81) | 0.30 (0.23 to 0.40) | -2.37 (-2.52 to -2.22) | 13.21 (8.16 to 20.38)  | 7.20 (5.69 to 9.23)    | -2.50 (-2.68 to -2.32) |
| 48 | Mali                             | 7.19 (5.85 to 8.93)       | 8.08 (6.68 to 9.79)       | 0.63 (0.48 to 0.79)    | 0.49 (0.20 to 0.89) | 0.47 (0.26 to 0.71) | -0.28 (-0.46 to -0.10) | 19.25 (6.81 to 33.36)  | 16.53 (8.45 to 26.83)  | -0.64 (-0.80 to -0.48) |
| 50 | Malta                            | 66.69 (57.4 to 76.82)     | 72.00 (63.55 to 81.87)    | 0.11 (0.05 to 0.17)    | 0.54 (0.48 to 0.62) | 0.62 (0.48 to 0.74) | 0.78 (0.57 to 0.99)    | 20.61 (16.77 to 24.94) | 22.28 (18.12 to 27.35) | 0.40 (0.30 to 0.50)    |
| 53 | Marshall Islands                 | 4.22 (3.40 to 5.11)       | 4.10 (3.35 to 4.93)       | -0.25 (-0.43 to -0.08) | 1.32 (0.84 to 1.88) | 0.83 (0.50 to 1.31) | -1.90 (-2.04 to -1.76) | 38.63 (23.47 to 58.16) | 24.94 (14.63 to 40.72) | -1.80 (-1.93 to -1.68) |
| 56 | Mauritania                       | 8.95 (7.32 to 10.94)      | 11.87 (9.73 to 14.62)     | 0.85 (0.70 to 0.99)    | 0.68 (0.41 to 0.99) | 0.41 (0.28 to 0.57) | -2.01 (-2.18 to -1.84) | 22.06 (12.99 to 31.74) | 13.42 (9.08 to 18.70)  | -1.97 (-2.14 to -1.80) |
| 58 | Mauritius                        | 4.55 (3.68 to 5.63)       | 5.50 (4.43 to 6.63)       | 0.68 (0.63 to 0.73)    | 0.17 (0.14 to 0.19) | 0.22 (0.17 to 0.28) | 1.44 (1.10 to 1.78)    | 5.3 (4.63 to 6.29)     | 7.7 (5.86 to 9.69)     | 1.88 (1.53 to 2.23)    |

|    |                  |                           |                           |                        |                     |                     |                        |                        |                        |                        |
|----|------------------|---------------------------|---------------------------|------------------------|---------------------|---------------------|------------------------|------------------------|------------------------|------------------------|
| 1  |                  |                           |                           |                        |                     |                     |                        |                        |                        |                        |
| 2  |                  |                           |                           |                        |                     |                     |                        |                        |                        |                        |
| 3  |                  |                           |                           |                        |                     |                     |                        |                        |                        |                        |
| 4  | Mexico           | 47.30 (40.55 to 55.27)    | 36.92 (31.76 to 42.73)    | -0.82 (-0.97 to -0.67) | 0.34 (0.31 to 0.39) | 0.45 (0.36 to 0.54) | 1.68 (1.33 to 2.02)    | 16.08 (13.61 to 19.12) | 17.13 (14.12 to 20.45) | 0.68 (0.41 to 0.96)    |
| 5  |                  |                           |                           |                        |                     |                     |                        |                        |                        |                        |
| 6  | Micronesia       |                           |                           |                        |                     |                     |                        |                        |                        |                        |
| 7  | (Federated       | 4.44 (3.61 to 5.35)       | 4.11 (3.40 to 4.96)       | -0.45 (-0.62 to -0.27) | 1.36 (0.88 to 1.97) | 0.80 (0.48 to 1.32) | -2.09 (-2.29 to -1.88) | 40.59 (25.23 to 65.57) | 23.88 (12.56 to 43.11) | -2.07 (-2.24 to -1.89) |
| 8  | States of)       |                           |                           |                        |                     |                     |                        |                        |                        |                        |
| 9  |                  |                           |                           |                        |                     |                     |                        |                        |                        |                        |
| 10 |                  | 102.48 (86.41 to 120.82)  | 110.59 (93.15 to 130.73)  | 0.31 (0.29 to 0.33)    | 0.38 (0.27 to 0.50) | 0.36 (0.27 to 0.47) | -0.07 (-0.15 to 0.01)  | 22.98 (17.18 to 30.02) | 23.10 (17.08 to 29.93) | 0.08 (0.06 to 0.10)    |
| 11 | Monaco           |                           |                           |                        |                     |                     |                        |                        |                        |                        |
| 12 |                  |                           |                           |                        |                     |                     |                        |                        |                        |                        |
| 13 |                  |                           |                           |                        |                     |                     |                        |                        |                        |                        |
| 14 | Mongolia         | 68.37 (56.95 to 82.11)    | 69.72 (57.44 to 83.84)    | 0.02 (0.01 to 0.04)    | 0.73 (0.47 to 1.01) | 0.45 (0.33 to 0.61) | -2.10 (-2.26 to -1.94) | 38.19 (25.22 to 51.55) | 24.75 (19.13 to 31.11) | -1.88 (-2.00 to -1.75) |
| 15 |                  |                           |                           |                        |                     |                     |                        |                        |                        |                        |
| 16 |                  | 135.02 (114.64 to 158.46) | 133.80 (112.95 to 156.37) | 0.02 (0.00 to 0.05)    | 0.29 (0.23 to 0.37) | 0.30 (0.23 to 0.37) | 0.27 (0.08 to 0.46)    | 29.84 (22.66 to 38.5)  | 28.38 (20.94 to 37.02) | -0.08 (-0.14 to -0.02) |
| 17 | Montenegro       |                           |                           |                        |                     |                     |                        |                        |                        |                        |
| 18 |                  |                           |                           |                        |                     |                     |                        |                        |                        |                        |
| 19 |                  |                           |                           |                        |                     |                     |                        |                        |                        |                        |
| 20 |                  | 15.56 (13.00 to 18.49)    | 17.60 (14.69 to 21.00)    | 0.60 (0.47 to 0.72)    | 0.23 (0.14 to 0.38) | 0.21 (0.15 to 0.28) | -0.17 (-0.38 to 0.04)  | 8.23 (5.69 to 11.59)   | 7.60 (5.86 to 9.68)    | -0.09 (-0.21 to 0.02)  |
| 21 | Morocco          |                           |                           |                        |                     |                     |                        |                        |                        |                        |
| 22 |                  |                           |                           |                        |                     |                     |                        |                        |                        |                        |
| 23 |                  | 5.71 (4.71 to 7.03)       | 6.30 (5.22 to 7.69)       | 0.38 (0.33 to 0.43)    | 0.69 (0.45 to 1.04) | 0.84 (0.58 to 1.20) | 0.94 (0.77 to 1.12)    | 22.30 (13.46 to 36.57) | 24.35 (16.57 to 34.27) | 0.62 (0.41 to 0.84)    |
| 24 | Mozambique       |                           |                           |                        |                     |                     |                        |                        |                        |                        |
| 25 |                  |                           |                           |                        |                     |                     |                        |                        |                        |                        |
| 26 |                  | 3.09 (2.42 to 3.79)       | 3.71 (3.00 to 4.59)       | 0.72 (0.63 to 0.81)    | 0.22 (0.13 to 0.31) | 0.13 (0.1 to 0.17)  | -1.95 (-2.07 to -1.83) | 7.97 (4.53 to 12.88)   | 4.34 (3.28 to 6.04)    | -2.29 (-2.41 to -2.17) |
| 27 | Myanmar          |                           |                           |                        |                     |                     |                        |                        |                        |                        |
| 28 |                  |                           |                           |                        |                     |                     |                        |                        |                        |                        |
| 29 |                  | 9.39 (7.72 to 11.59)      | 11.47 (9.48 to 14.12)     | 0.66 (0.54 to 0.77)    | 0.72 (0.50 to 1.00) | 0.63 (0.45 to 0.87) | -0.61 (-0.80 to -0.41) | 21.26 (13.8 to 28.84)  | 18.09 (12.71 to 26.34) | -0.52 (-0.63 to -0.41) |
| 30 | Namibia          |                           |                           |                        |                     |                     |                        |                        |                        |                        |
| 31 |                  |                           |                           |                        |                     |                     |                        |                        |                        |                        |
| 32 |                  | 5.33 (4.35 to 6.41)       | 5.02 (4.11 to 6.11)       | -0.61 (-0.94 to -0.28) | 1.37 (0.82 to 2.13) | 0.92 (0.54 to 1.45) | -1.85 (-2.09 to -1.61) | 42.03 (22.9 to 73.19)  | 27.18 (13.97 to 47.82) | -1.87 (-2.08 to -1.65) |
| 33 | Nauru            |                           |                           |                        |                     |                     |                        |                        |                        |                        |
| 34 |                  |                           |                           |                        |                     |                     |                        |                        |                        |                        |
| 35 |                  | 16.18 (12.92 to 20.54)    | 18.72 (15.04 to 23.18)    | 0.55 (0.50 to 0.59)    | 0.98 (0.57 to 1.86) | 0.59 (0.36 to 0.98) | -1.88 (-2.06 to -1.69) | 28.52 (18.28 to 47.84) | 15.65 (10.93 to 23.88) | -2.15 (-2.36 to -1.94) |
| 36 | Nepal            |                           |                           |                        |                     |                     |                        |                        |                        |                        |
| 37 |                  | 142.28 (129.20 to 155.78) | 73.64 (63.08 to 85.72)    | -2.19 (-2.78 to -1.60) | 1.43 (1.24 to 1.75) | 2.08 (1.58 to 2.40) | 1.35 (0.87 to 1.84)    | 47.17 (39.07 to 56.59) | 41.11 (35.20 to 47.09) | -0.50 (-0.93 to -0.06) |
| 38 | Netherlands      |                           |                           |                        |                     |                     |                        |                        |                        |                        |
| 39 |                  |                           |                           |                        |                     |                     |                        |                        |                        |                        |
| 40 |                  | 160.29 (139.19 to 182.59) | 168.32 (152.62 to 186.95) | 0.20 (0.15 to 0.26)    | 0.53 (0.45 to 0.59) | 0.38 (0.32 to 0.46) | -1.70 (-2.05 to -1.34) | 34.31 (26.39 to 43.21) | 31.98 (23.24 to 41.73) | -0.32 (-0.42 to -0.22) |
| 41 | New Zealand      |                           |                           |                        |                     |                     |                        |                        |                        |                        |
| 42 |                  |                           |                           |                        |                     |                     |                        |                        |                        |                        |
| 43 |                  |                           |                           |                        |                     |                     |                        |                        |                        |                        |
| 44 |                  | 23.25 (19.28 to 27.88)    | 26.41 (22.30 to 31.28)    | 0.20 (0.10 to 0.31)    | 0.15 (0.12 to 0.18) | 0.17 (0.13 to 0.21) | 0.48 (0.30 to 0.67)    | 7.80 (6.25 to 9.75)    | 8.26 (6.41 to 10.34)   | 0.12 (-0.02 to 0.25)   |
| 45 | Nicaragua        |                           |                           |                        |                     |                     |                        |                        |                        |                        |
| 46 |                  |                           |                           |                        |                     |                     |                        |                        |                        |                        |
| 47 |                  | 7.12 (5.75 to 8.74)       | 7.75 (6.26 to 9.48)       | 0.37 (0.26 to 0.48)    | 0.58 (0.28 to 0.99) | 0.5 (0.29 to 0.79)  | -0.71 (-0.92 to -0.51) | 21.59 (8.82 to 38.22)  | 17.16 (9.15 to 26.85)  | -1.08 (-1.30 to -0.86) |
| 48 | Niger            |                           |                           |                        |                     |                     |                        |                        |                        |                        |
| 49 |                  |                           |                           |                        |                     |                     |                        |                        |                        |                        |
| 50 |                  | 8.88 (7.36 to 10.86)      | 11.03 (9.13 to 13.41)     | 0.98 (0.83 to 1.14)    | 0.57 (0.28 to 0.97) | 0.52 (0.28 to 0.83) | -0.11 (-0.21 to -0.02) | 19.98 (11.19 to 32.55) | 17.08 (10.24 to 26.72) | -0.43 (-0.51 to -0.35) |
| 51 | Nigeria          |                           |                           |                        |                     |                     |                        |                        |                        |                        |
| 52 |                  |                           |                           |                        |                     |                     |                        |                        |                        |                        |
| 53 |                  | 5.82 (4.77 to 7.03)       | 5.53 (4.56 to 6.74)       | -0.24 (-0.39 to -0.08) | 0.96 (0.67 to 1.38) | 0.63 (0.38 to 0.91) | -1.75 (-1.86 to -1.63) | 29.80 (19.61 to 46.61) | 19.00 (10.29 to 29.66) | -1.92 (-2.07 to -1.78) |
| 54 | Niue             |                           |                           |                        |                     |                     |                        |                        |                        |                        |
| 55 |                  |                           |                           |                        |                     |                     |                        |                        |                        |                        |
| 56 |                  | 119.00 (100.79 to 140.81) | 122.13 (103.27 to 143.78) | 0.14 (0.12 to 0.17)    | 0.20 (0.15 to 0.25) | 0.18 (0.13 to 0.23) | -0.21 (-0.36 to -0.07) | 23.91 (17.63 to 31.43) | 23.32 (16.99 to 31.08) | 0.00 (-0.04 to 0.05)   |
| 57 | North Macedonia  |                           |                           |                        |                     |                     |                        |                        |                        |                        |
| 58 |                  |                           |                           |                        |                     |                     |                        |                        |                        |                        |
| 59 |                  | 6.60 (5.47 to 7.98)       | 5.79 (4.80 to 6.96)       | -0.61 (-0.80 to -0.42) | 1.28 (0.85 to 1.82) | 0.38 (0.26 to 0.73) | -4.76 (-5.32 to -4.19) | 34.73 (23.54 to 50.03) | 11.56 (7.82 to 20.63)  | -4.28 (-4.78 to -3.78) |
| 60 | Northern Mariana |                           |                           |                        |                     |                     |                        |                        |                        |                        |

|    |                 |               |               |               |               |               |               |               |               |               |
|----|-----------------|---------------|---------------|---------------|---------------|---------------|---------------|---------------|---------------|---------------|
| 1  |                 |               |               |               |               |               |               |               |               |               |
| 2  |                 |               |               |               |               |               |               |               |               |               |
| 3  | Islands         |               |               |               |               |               |               |               |               |               |
| 4  |                 | 406.73        | 498.95        |               |               |               |               |               |               |               |
| 5  |                 | (342.53 to    | (429.41 to    | 0.38 (0.24 to | 0.43 (0.39 to | 0.38 (0.32 to | -0.86 (-1.19  | 69.15 (49.57  | 80.37 (56.25  | 0.17 (0.01 to |
| 6  | Norway          | 478.15)       | 570.55)       | 0.52)         | 0.58)         | 0.52)         | to -0.53)     | to 92.09)     | to 108.56)    | 0.33)         |
| 7  |                 |               |               |               |               |               |               |               |               |               |
| 8  |                 |               |               |               |               |               |               |               |               |               |
| 9  | Oman            | 32.04 (26.30  | 33.81 (27.79  | 0.24 (0.08 to | 0.23 (0.12 to | 0.23 (0.15 to | 0.58 (0.34 to | 10.5 (7.14 to | 9.96 (7.66 to | 0.17 (0.00 to |
| 10 |                 | to 38.55)     | to 40.80)     | 0.40)         | 0.39)         | 0.34)         | 0.82)         | 15.11)        | 12.72)        | 0.35)         |
| 11 |                 |               |               |               |               |               |               |               |               |               |
| 12 | Pakistan        | 13.75 (11.11  | 16.77 (13.78  | 0.77 (0.72 to | 0.78 (0.39 to | 0.62 (0.41 to | -0.87 (-0.93  | 21.52 (12.69  | 17.80 (12.91  | -0.71 (-0.77  |
| 13 |                 | to 17.15)     | to 21.25)     | 0.81)         | 1.57)         | 0.99)         | to -0.80)     | to 38.34)     | to 25.37)     | to -0.66)     |
| 14 | Palau           | 5.62 (4.60 to | 5.22 (4.30 to | -0.40 (-0.56  | 0.88 (0.53 to | 0.62 (0.29 to | -1.36 (-1.47  | 26.21 (13.51  | 19.34 (8.32   | -1.21 (-1.31  |
| 15 |                 | 6.79)         | 6.32)         | to -0.24)     | 1.46)         | 0.97)         | to -1.24)     | to 47.84)     | to 32.27)     | to -1.10)     |
| 16 |                 |               |               |               |               |               |               |               |               |               |
| 17 | Palestine       | 31.49 (25.86  | 35.42 (29.15  | 0.71 (0.52 to | 0.33 (0.23 to | 0.20 (0.15 to | -2.83 (-3.48  | 11.67 (8.60   | 9.47 (7.18 to | -1.16 (-1.42  |
| 18 |                 | to 38.19)     | to 42.61)     | 0.90)         | 0.50)         | 0.29)         | to -2.18)     | to 16.06)     | 12.75)        | to -0.90)     |
| 19 | Panama          | 30.64 (26.19  | 31.9 (26.95   | 0.09 (0.04 to | 0.40 (0.33 to | 0.59 (0.45 to | 2.20 (1.67 to | 19.61 (16.04  | 24.28 (18.4   | 1.57 (1.10 to |
| 20 |                 | to 35.44)     | to 37.19)     | 0.14)         | 0.57)         | 0.76)         | 2.73)         | to 24.02)     | to 31.52)     | 2.05)         |
| 21 | Papua New       | 4.05 (3.24 to | 3.65 (2.96 to | -0.52 (-0.69  | 0.54 (0.31 to | 0.42 (0.27 to | -1.02 (-1.10  | 19.34 (11.2   | 14.68 (9.5 to | -1.09 (-1.18  |
| 22 | Guinea          | 4.88)         | 4.45)         | to -0.35)     | 0.80)         | 0.63)         | to -0.93)     | to 29.45)     | 21.87)        | to -1.00)     |
| 23 |                 |               |               |               |               |               |               |               |               |               |
| 24 | Paraguay        | 35.78 (30.69  | 30.96 (26.24  | -0.62 (-0.73  | 0.16 (0.13 to | 0.21 (0.15 to | 1.35 (1.08 to | 10.62 (8.39   | 10.30 (7.70   | 0.12 (-0.06   |
| 25 |                 | to 41.49)     | to 36.59)     | to -0.50)     | 0.21)         | 0.28)         | 1.63)         | to 13.36)     | to 13.16)     | to 0.29)      |
| 26 |                 |               |               |               |               |               |               |               |               |               |
| 27 | Peru            | 17.18 (14.20  | 16.74 (13.74  | -0.14 (-0.17  | 0.69 (0.47 to | 0.23 (0.16 to | -4.20 (-4.68  | 34.79 (19.65  | 9.31 (6.89 to | -5.08 (-5.69  |
| 28 |                 | to 20.56)     | to 20.14)     | to -0.10)     | 0.93)         | 0.32)         | to -3.72)     | to 53.77)     | 12.58)        | to -4.47)     |
| 29 |                 |               |               |               |               |               |               |               |               |               |
| 30 | Philippines     | 4.47 (3.59 to | 4.96 (4.02 to | 0.35 (0.25 to | 0.35 (0.16 to | 0.16 (0.13 to | -3.25 (-3.54  | 8.94 (5.36 to | 4.87 (4.06 to | -2.61 (-2.86  |
| 31 |                 | 5.38)         | 6.00)         | 0.46)         | 0.46)         | 0.20)         | to -2.95)     | 11.07)        | 6.26)         | to -2.35)     |
| 32 |                 |               |               |               |               |               |               |               |               |               |
| 33 | Poland          | 418.60        | 177.25        | -3.73 (-4.52  | 0.44 (0.41 to | 0.53 (0.42 to | 0.82 (0.68 to | 72.05 (51.85  | 38.44 (29.32  | -2.70 (-3.28  |
| 34 |                 | (351.62 to    | (157.39 to    | to -2.94)     | 0.51)         | 0.62)         | 0.96)         | to 95.72)     | to 49.04)     | to -2.11)     |
| 35 |                 | 498.71)       | 199.48)       |               |               |               |               |               |               |               |
| 36 | Portugal        | 52.37 (46.30  | 74.24 (66.91  | 0.72 (0.46 to | 0.69 (0.60 to | 1.06 (0.57 to | 2.38 (1.99 to | 20.51 (17.46  | 27.82 (20.23  | 1.24 (1.07 to |
| 37 |                 | to 58.76)     | to 82.44)     | 0.99)         | 0.76)         | 1.24)         | 2.77)         | to 24.14)     | to 33.05)     | 1.41)         |
| 38 |                 |               |               |               |               |               |               |               |               |               |
| 39 | Puerto Rico     | 31.12 (29.32  | 30.88 (28.28  | 0.00 (-0.04   | 0.56 (0.43 to | 0.27 (0.19 to | -3.70 (-4.28  | 21.05 (16.43  | 12.28 (9.43   | -2.69 (-3.09  |
| 40 |                 | to 33.10)     | to 33.59)     | to 0.04)      | 0.64)         | 0.41)         | to -3.10)     | to 24.23)     | to 16.08)     | to -2.29)     |
| 41 |                 |               |               |               |               |               |               |               |               |               |
| 42 | Qatar           | 38.47 (31.44  | 44.46 (36.75  | 0.53 (0.42 to | 0.37 (0.24 to | 0.34 (0.21 to | 0.52 (0.07 to | 14.06 (10.55  | 13.06 (9.28   | 0.13 (-0.12   |
| 43 |                 | to 45.79)     | to 53.66)     | 0.64)         | 0.59)         | 0.51)         | 0.98)         | to 19.68)     | to 17.59)     | to 0.37)      |
| 44 | Republic of     | 37.89 (33.49  | 70.21 (66.03  | 1.25 (0.89 to | 1.76 (0.56 to | 0.30 (0.23 to | -7.96 (-8.67  | 31.72 (18.30  | 15 (11.13 to  | -3.63 (-4.02  |
| 45 | Korea           | to 42.88)     | to 74.79)     | 1.61)         | 2.34)         | 0.39)         | to -7.25)     | to 38.85)     | 19.33)        | to -3.23)     |
| 46 | Republic of     | 67.21 (55.76  | 66.12 (59.51  | 0.47 (0.09 to | 0.38 (0.32 to | 0.33 (0.27 to | -0.60 (-0.96  | 22.87 (18.45  | 20.72 (16.98  | -0.20 (-0.52  |
| 47 | Moldova         | to 80.49)     | to 73.09)     | 0.85)         | 0.47)         | 0.39)         | to -0.25)     | to 27.69)     | to 25.12)     | to 0.13)      |
| 48 |                 |               |               |               |               |               |               |               |               |               |
| 49 | Romania         | 70.01 (58.65  | 70.93 (63.66  | 0.37 (0.16 to | 0.27 (0.23 to | 0.23 (0.18 to | -0.65 (-1.01  | 21.99 (17.23  | 17.97 (13.92  | -0.63 (-0.89  |
| 50 |                 | to 82.51)     | to 79.55)     | 0.59)         | 0.31)         | 0.28)         | to -0.29)     | to 27.18)     | to 22.6)      | to -0.37)     |
| 51 | Russian         | 95.59 (81.25  | 85.89 (72.98  | -0.12 (-0.25  | 0.57 (0.42 to | 0.56 (0.46 to | -0.40 (-0.74  | 30.76 (24.06  | 28.04 (22.97  | -0.52 (-0.70  |
| 52 | Federation      | to 111.84)    | to 100.35)    | to 0.00)      | 0.66)         | 0.66)         | to -0.06)     | to 37.42)     | to 34.48)     | to -0.35)     |
| 53 |                 |               |               |               |               |               |               |               |               |               |
| 54 | Rwanda          | 6.69 (5.55 to | 7.89 (6.47 to | 0.57 (0.40 to | 0.92 (0.61 to | 0.65 (0.42 to | -1.79 (-2.06  | 29.08 (17.93  | 19.33 (12.66  | -1.92 (-2.15  |
| 55 |                 | 8.31)         | 9.74)         | 0.74)         | 1.40)         | 0.92)         | to -1.51)     | to 46.16)     | to 28.48)     | to -1.69)     |
| 56 | Saint Kitts and | 29.59 (24.68  | 28.95 (23.75  | 0.06 (-0.02   | 2.25 (1.70 to | 1.44 (1.06 to | -2.01 (-2.26  | 67.93 (52.91  | 42.16 (29.05  | -2.07 (-2.32  |
| 57 | Nevis           | to 35.93)     | to 35.61)     | to 0.14)      | 2.63)         | 2.05)         | to -1.76)     | to 79.57)     | to 61.00)     | to -1.82)     |
| 58 | Saint Lucia     | 25.70 (21.15  | 27.48 (22.74  | 0.32 (0.22 to | 0.99 (0.78 to | 0.65 (0.51 to | -2.24 (-2.69  | 32.61 (26.63  | 22.26 (17.86  | -1.84 (-2.19  |
| 59 |                 |               |               |               |               |               |               |               |               |               |
| 60 |                 |               |               |               |               |               |               |               |               |               |

|    |               |               |               |               |               |               |               |               |               |               |
|----|---------------|---------------|---------------|---------------|---------------|---------------|---------------|---------------|---------------|---------------|
| 1  |               |               |               |               |               |               |               |               |               |               |
| 2  |               |               |               |               |               |               |               |               |               |               |
| 3  |               | to 31.22)     | to 33.54)     | 0.42)         | 1.15)         | 0.84)         | to -1.78)     | to 37.29)     | to 28.14)     | to -1.49)     |
| 4  |               |               |               |               |               |               |               |               |               |               |
| 5  | Saint Vincent | 24.91 (20.72  | 24.40 (20.24  | 0.24 (0.13 to | 1.31 (1.08 to | 1.22 (0.98 to | -0.56 (-0.70  | 44.25 (37.35  | 38.61 (31.46  | -0.80 (-0.94  |
| 6  | and the       | to 30.36)     | to 29.76)     | 0.34)         | 1.57)         | 1.53)         | to -0.41)     | to 51.61)     | to 48.07)     | to -0.67)     |
| 7  | Grenadines    |               |               |               |               |               |               |               |               |               |
| 8  |               |               |               |               |               |               |               |               |               |               |
| 9  | Samoa         | 5.60 (4.60 to | 4.77 (3.92 to | -0.77 (-1.05  | 0.98 (0.66 to | 0.63 (0.45 to | -1.64 (-1.80  | 27.95 (18.61  | 17.97 (11.92  | -1.62 (-1.75  |
| 10 |               | 6.71)         | 5.78)         | to -0.49)     | 1.49)         | 0.85)         | to -1.47)     | to 40.58)     | to 26.18)     | to -1.49)     |
| 11 |               | 107.02        | 112.86        |               |               |               |               |               |               |               |
| 12 | San Marino    | (89.88 to     | (94.72 to     | 0.23 (0.21 to | 0.37 (0.27 to | 0.36 (0.22 to | 0.22 (0.06 to | 21.57 (15.79  | 21.79 (15.52  | 0.15 (0.11 to |
| 13 |               | 126.67)       | 132.67)       | 0.24)         | 0.48)         | 0.53)         | 0.38)         | to 28.34)     | to 28.71)     | 0.19)         |
| 14 |               |               |               |               |               |               |               |               |               |               |
| 15 | Sao Tome and  | 10.50 (8.66   | 11.85 (9.61   | 0.59 (0.46 to | 0.46 (0.26 to | 0.31 (0.21 to | -1.58 (-1.93  | 15.7 (9.25 to | 10.34 (7.41   | -1.71 (-2.03  |
| 16 | Principe      | to 12.87)     | to 14.64)     | 0.71)         | 0.73)         | 0.50)         | to -1.24)     | 23.73)        | to 15.57)     | to -1.38)     |
| 17 |               |               |               |               |               |               |               |               |               |               |
| 18 | Saudi Arabia  | 33.86 (28.47  | 34.43 (28.66  | 0.22 (0.09 to | 0.19 (0.11 to | 0.15 (0.11 to | -0.60 (-0.71  | 9.73 (6.96 to | 8.9 (6.65 to  | -0.18 (-0.25  |
| 19 |               | to 40.38)     | to 41.36)     | 0.35)         | 0.31)         | 0.21)         | to -0.48)     | 13.65)        | 11.75)        | to -0.10)     |
| 20 |               |               |               |               |               |               |               |               |               |               |
| 21 | Senegal       | 8.06 (6.57 to | 8.84 (7.25 to | 0.39 (0.27 to | 0.55 (0.29 to | 0.43 (0.27 to | -1.00 (-1.21  | 18.61 (9.28   | 14.15 (8.71   | -1.12 (-1.32  |
| 22 |               | 9.88)         | 11.10)        | 0.51)         | 0.93)         | 0.65)         | to -0.78)     | to 29.66)     | to 21.53)     | to -0.91)     |
| 23 |               | 118.24        | 151.50        |               |               |               |               |               |               |               |
| 24 | Serbia        | (99.70 to     | (130.14 to    | 0.43 (0.26 to | 0.49 (0.37 to | 0.76 (0.50 to | 2.49 (2.05 to | 31.72 (24.28  | 39.47 (29.72  | 0.83 (0.67 to |
| 25 |               | 138.39)       | 173.84)       | 0.61)         | 0.78)         | 0.97)         | 2.94)         | to 43.38)     | to 49.82)     | 0.98)         |
| 26 |               |               |               |               |               |               |               |               |               |               |
| 27 | Seychelles    | 4.66 (3.75 to | 5.45 (4.43 to | 0.52 (0.44 to | 0.30 (0.19 to | 0.22 (0.16 to | -1.44 (-1.65  | 8.38 (5.69 to | 6.28 (4.77 to | -1.35 (-1.51  |
| 28 |               | 5.71)         | 6.55)         | 0.60)         | 0.38)         | 0.30)         | to -1.23)     | 10.68)        | 7.85)         | to -1.19)     |
| 29 |               |               |               |               |               |               |               |               |               |               |
| 30 | Sierra Leone  | 7.33 (6.06 to | 8.45 (6.95 to | 0.64 (0.51 to | 0.42 (0.19 to | 0.43 (0.24 to | 0.20 (-0.07   | 15.88 (6.30   | 15.30 (8.12   | 0.00 (-0.27   |
| 31 |               | 9.02)         | 10.53)        | 0.77)         | 0.72)         | 0.61)         | to 0.48)      | to 28.04)     | to 23.35)     | to 0.26)      |
| 32 |               |               |               |               |               |               |               |               |               |               |
| 33 | Singapore     | 47.14 (38.3   | 41.88 (34.28  | -0.58 (-0.74  | 0.18 (0.14 to | 0.07 (0.06 to | -3.18 (-3.41  | 12.19 (9.33   | 8.16 (5.69 to | -1.52 (-1.73  |
| 34 |               | to 56.56)     | to 51.91)     | to -0.43)     | 0.20)         | 0.11)         | to -2.95)     | to 15.58)     | 11.25)        | to -1.31)     |
| 35 |               | 165.72        | 154.57        |               |               |               |               |               |               |               |
| 36 | Slovakia      | (148.05 to    | (140.40 to    | -0.05 (-0.12  | 0.54 (0.45 to | 0.68 (0.48 to | 1.56 (1.21 to | 40.62 (31.28  | 40.31 (30.39  | 0.34 (0.19 to |
| 37 |               | 183.09)       | 170.08)       | to 0.02)      | 0.84)         | 0.90)         | 1.91)         | to 53.36)     | to 50.67)     | 0.49)         |
| 38 |               | 167.07        | 179.18        |               |               |               |               |               |               |               |
| 39 | Slovenia      | (146.63 to    | (160.70 to    | 0.15 (0.08 to | 0.44 (0.33 to | 0.39 (0.28 to | -1.39 (-2.13  | 34.68 (25.60  | 34.27 (24.57  | -0.42 (-0.67  |
| 40 |               | 189.8)        | 199.69)       | 0.21)         | 0.56)         | 0.52)         | to -0.65)     | to 44.77)     | to 44.81)     | to -0.17)     |
| 41 |               |               |               |               |               |               |               |               |               |               |
| 42 | Solomon       | 3.49 (2.80 to | 3.35 (2.73 to | -0.31 (-0.46  | 0.75 (0.42 to | 0.53 (0.33 to | -1.42 (-1.56  | 24.39 (12.55  | 17.28 (10.22  | -1.38 (-1.51  |
| 43 | Islands       | 4.25)         | 4.12)         | to -0.15)     | 1.16)         | 0.79)         | to -1.29)     | to 43.26)     | to 29.48)     | to -1.25)     |
| 44 |               |               |               |               |               |               |               |               |               |               |
| 45 | Somalia       | 5.39 (4.41 to | 5.28 (4.33 to | -0.09 (-0.12  | 0.55 (0.29 to | 0.48 (0.30 to | -0.45 (-0.53  | 17.8 (7.75 to | 14.47 (8.44   | -0.63 (-0.69  |
| 46 |               | 6.68)         | 6.56)         | to -0.06)     | 0.91)         | 0.79)         | to -0.37)     | 34.12)        | to 24.4)      | to -0.56)     |
| 47 |               |               |               |               |               |               |               |               |               |               |
| 48 | South Africa  | 11.04 (9.21   | 12.40 (10.36  | 0.52 (0.44 to | 0.39 (0.30 to | 0.39 (0.30 to | 0.13 (-0.38   | 15.07 (10.33  | 12.17 (9.76   | -0.56 (-0.99  |
| 49 |               | to 13.55)     | to 15.05)     | 0.60)         | 0.50)         | 0.47)         | to 0.64)      | to 20.06)     | to 14.04)     | to -0.14)     |
| 50 |               |               |               |               |               |               |               |               |               |               |
| 51 | South Sudan   | 6.93 (5.69 to | 7.78 (6.41 to | 0.35 (0.31 to | 0.68 (0.39 to | 0.65 (0.36 to | -0.05 (-0.09  | 22.59 (10.42  | 19.12 (11.06  | -0.45 (-0.58  |
| 52 |               | 8.55)         | 9.49)         | 0.40)         | 1.43)         | 1.40)         | to 0.00)      | to 43.44)     | to 39.88)     | to -0.32)     |
| 53 |               |               | 134.10        |               |               |               |               |               |               |               |
| 54 | Spain         | 90.41 (86.16  | (127.51 to    | 0.77 (0.60 to | 0.54 (0.46 to | 0.35 (0.29 to | -2.16 (-2.54  | 24.91 (20.33  | 27.31 (20.61  | -0.26 (-0.47  |
| 55 |               | to 94.9)      | 141.19)       | 0.95)         | 0.60)         | 0.50)         | to -1.78)     | to 30.25)     | to 34.99)     | to -0.05)     |
| 56 |               |               |               |               |               |               |               |               |               |               |
| 57 | Sri Lanka     | 5.98 (4.90 to | 9.51 (8.29 to | 1.67 (1.38 to | 0.18 (0.14 to | 0.10 (0.07 to | -2.15 (-2.31  | 5.73 (4.38 to | 3.77 (2.86 to | -1.45 (-1.57  |
| 58 |               | 7.28)         | 10.90)        | 1.96)         | 0.23)         | 0.13)         | to -1.99)     | 7.09)         | 4.79)         | to -1.33)     |
| 59 | Sudan         | 25.18 (20.47  | 30.96 (25.17  | 0.90 (0.76 to | 0.21 (0.10 to | 0.25 (0.14 to | 0.95 (0.78 to | 9.58 (5.87 to | 10.84 (7.56   | 0.71 (0.58 to |
| 60 |               |               |               |               |               |               |               |               |               |               |

|    |              |               |               |               |               |               |               |               |               |               |
|----|--------------|---------------|---------------|---------------|---------------|---------------|---------------|---------------|---------------|---------------|
| 1  |              |               |               |               |               |               |               |               |               |               |
| 2  |              |               |               |               |               |               |               |               |               |               |
| 3  |              | to 31.02)     | to 37.98)     | 1.05)         | 0.39)         | 0.43)         | 1.11)         | 15.53)        | to 15.32)     | 0.84)         |
| 4  |              | 25.78 (21.39  | 25.28 (20.76  | 0.11 (0.01 to | 1.00 (0.77 to | 0.66 (0.50 to | -1.99 (-2.24  | 35.66 (26.78  | 23.00 (18.20  | -1.99 (-2.24  |
| 5  | Suriname     | to 31.18)     | to 30.88)     | 0.22)         | 1.18)         | 0.86)         | to -1.73)     | to 43.03)     | to 29.10)     | to -1.75)     |
| 6  |              | 294.18        | 315.22        |               |               |               |               |               |               |               |
| 7  |              | (253.51 to    | (271.18 to    | 0.31 (0.28 to | 0.68 (0.56 to | 0.38 (0.31 to | -3.16 (-4.26  | 56.12 (41.20  | 53.00 (37.35  | -0.35 (-0.54  |
| 8  | Sweden       | 336.93)       | 360.86)       | 0.34)         | 0.75)         | 0.56)         | to -2.06)     | to 73.41)     | to 71.73)     | to -0.16)     |
| 9  |              | 129.02        | 134.73        |               |               |               |               |               |               |               |
| 10 |              | (116.30 to    | (121.98 to    | 0.09 (0.06 to | 0.68 (0.54 to | 0.58 (0.47 to | -1.03 (-1.80  | 32.21 (25.49  | 29.51 (22.30  | -0.56 (-0.82  |
| 11 | Switzerland  | 142.70)       | 148.05)       | 0.12)         | 0.77)         | 0.75)         | to -0.26)     | to 39.69)     | to 37.67)     | to -0.31)     |
| 12 |              | 28.71 (23.39  | 33.67 (27.34  | 0.96 (0.65 to | 0.46 (0.23 to | 0.36 (0.19 to | -1.00 (-1.20  | 14.71 (9.86   | 12.75 (9.00   | -0.46 (-0.53  |
| 13 | Syrian Arab  | to 35.03)     | to 40.47)     | 1.26)         | 0.76)         | 0.52)         | to -0.80)     | to 20.18)     | to 16.93)     | to -0.39)     |
| 14 | Republic     |               |               |               |               |               |               |               |               |               |
| 15 | Taiwan       | 11.23 (9.74   | 27.80 (24.80  | 4.29 (3.71 to | 0.91 (0.57 to | 0.50 (0.38 to | -2.08 (-3.37  | 17.35 (12.32  | 12.40 (10.06  | -0.85 (-1.78  |
| 16 | (Province of | to 12.86)     | to 31.28)     | 4.86)         | 1.04)         | 0.65)         | to -0.78)     | to 19.43)     | to 15.44)     | to 0.10)      |
| 17 | China)       |               |               |               |               |               |               |               |               |               |
| 18 | Tajikistan   | 68.84 (56.59  | 71.19 (59.54  | 0.12 (0.07 to | 0.41 (0.28 to | 0.3 (0.22 to  | -0.79 (-0.88  | 30.29 (19.52  | 20.60 (15.55  | -0.89 (-1.10  |
| 19 |              | to 83.10)     | to 85.49)     | 0.18)         | 0.58)         | 0.41)         | to -0.70)     | to 43.28)     | to 26.90)     | to -0.69)     |
| 20 | Thailand     | 3.31 (2.57 to | 4.28 (3.44 to | 0.96 (0.83 to | 0.2 (0.14 to  | 0.12 (0.08 to | -2.46 (-2.78  | 6.06 (4.39 to | 3.64 (2.76 to | -2.40 (-2.71  |
| 21 |              | 4.15)         | 5.22)         | 1.08)         | 0.26)         | 0.15)         | to -2.14)     | 7.89)         | 4.68)         | to -2.09)     |
| 22 | Timor-Leste  | 3.20 (2.51 to | 3.90 (3.14 to | 0.84 (0.75 to | 0.42 (0.17 to | 0.36 (0.20 to | -0.57 (-0.70  | 11.64 (5.58   | 9.14 (5.17 to | -0.95 (-1.13  |
| 23 |              | 3.91)         | 4.72)         | 0.94)         | 0.83)         | 0.61)         | to -0.44)     | to 22.42)     | 14.89)        | to -0.77)     |
| 24 | Togo         | 9.42 (7.74 to | 9.00 (7.38 to | 0.03 (-0.09   | 0.49 (0.28 to | 0.48 (0.32 to | -0.05 (-0.31  | 17.29 (9.05   | 16.30 (10.74  | -0.23 (-0.48  |
| 25 |              | 11.41)        | 11.07)        | to 0.15)      | 0.76)         | 0.68)         | to 0.21)      | to 26.59)     | to 22.75)     | to 0.01)      |
| 26 | Tokelau      | 4.65 (3.78 to | 5.36 (4.37 to | 0.72 (0.46 to | 0.89 (0.57 to | 0.58 (0.42 to | -1.72 (-1.88  | 25.84 (15.77  | 16.11 (11.19  | -1.68 (-1.80  |
| 27 |              | 5.66)         | 6.54)         | 0.97)         | 1.34)         | 0.78)         | to -1.57)     | to 38.77)     | to 22.98)     | to -1.56)     |
| 28 | Tonga        | 5.55 (4.56 to | 4.96 (4.08 to | -0.51 (-0.69  | 1.14 (0.67 to | 0.76 (0.56 to | -1.73 (-1.92  | 31.30 (19.82  | 21.58 (15.55  | -1.63 (-1.83  |
| 29 |              | 6.66)         | 5.98)         | to -0.32)     | 1.64)         | 1.02)         | to -1.54)     | to 44.12)     | to 30.10)     | to -1.44)     |
| 30 | Trinidad and | 27.68 (22.88  | 27.49 (22.91  | 0.31 (0.17 to | 0.34 (0.24 to | 0.29 (0.21 to | -0.98 (-1.25  | 14.27 (10.86  | 12.54 (9.51   | -0.66 (-0.84  |
| 31 | Tobago       | to 33.63)     | to 33.71)     | 0.45)         | 0.39)         | 0.39)         | to -0.72)     | to 16.75)     | to 16.14)     | to -0.48)     |
| 32 | Tunisia      | 35.29 (29.00  | 40.47 (33.21  | 0.59 (0.45 to | 0.15 (0.1 to  | 0.14 (0.09 to | -0.05 (-0.15  | 9.05 (6.50 to | 9.36 (6.89 to | 0.27 (0.17 to |
| 33 |              | to 42.68)     | to 49.35)     | 0.73)         | 0.22)         | 0.20)         | to 0.06)      | 12.22)        | 12.40)        | 0.37)         |
| 34 | Turkey       | 50.66 (44.42  | 98.87 (84.96  | 2.04 (1.87 to | 0.67 (0.43 to | 0.40 (0.30 to | -1.87 (-2.02  | 27.88 (19.30  | 25.05 (19.42  | -0.61 (-0.70  |
| 35 |              | to 56.99)     | to 113.45)    | 2.20)         | 1.06)         | 0.56)         | to -1.72)     | to 38.53)     | to 32.24)     | to -0.51)     |
| 36 | Turkmenistan | 69.03 (57.31  | 77.89 (64.42  | 0.43 (0.32 to | 0.37 (0.28 to | 0.33 (0.22 to | -0.50 (-0.78  | 24.59 (17.78  | 22.90 (16.63  | -0.20 (-0.38  |
| 37 |              | to 82.24)     | to 92.76)     | 0.54)         | 0.49)         | 0.46)         | to -0.21)     | to 31.67)     | to 29.27)     | to -0.02)     |
| 38 | Tuvalu       | 4.48 (3.63 to | 4.08 (3.38 to | -0.47 (-0.63  | 1.08 (0.65 to | 0.71 (0.47 to | -1.60 (-1.73  | 33.30 (17.86  | 21.17 (13.37  | -1.65 (-1.76  |
| 39 |              | 5.44)         | 4.88)         | to -0.30)     | 1.59)         | 1.05)         | to -1.47)     | to 54.06)     | to 33.22)     | to -1.55)     |
| 40 | Uganda       | 5.79 (4.75 to | 7.14 (5.88 to | 1.01 (0.88 to | 0.59 (0.37 to | 0.61 (0.40 to | -0.03 (-0.17  | 17.22 (11.39  | 17.40 (12.18  | -0.02 (-0.16  |
| 41 |              | 7.14)         | 8.92)         | 1.15)         | 0.91)         | 0.92)         | to 0.10)      | to 25.60)     | to 25.46)     | to 0.13)      |
| 42 | Ukraine      | 68.71 (57.64  | 68 (57.27 to  | 0.19 (0.03 to | 0.34 (0.26 to | 0.39 (0.31 to | 0.17 (-0.10   | 21.06 (16.76  | 23.62 (18.99  | 0.34 (0.12 to |
| 43 |              | to 82.57)     | 80.79)        | 0.35)         | 0.45)         | 0.48)         | to 0.44)      | to 26.65)     | to 28.82)     | 0.56)         |
| 44 | United Arab  | 36.50 (30.28  | 42.72 (35.58  | 0.73 (0.60 to | 0.21 (0.09 to | 0.24 (0.15 to | 0.72 (0.25 to | 10.79 (6.88   | 12.40 (8.88   | 0.73 (0.52 to |
| 45 | Emirates     | to 44.12)     | to 51.97)     | 0.87)         | 0.43)         | 0.43)         | 1.20)         | to 16.90)     | to 17.45)     | 0.94)         |
| 46 | United       | 223.81        | 240.37        | 0.17 (0.12 to | 0.97 (0.85 to | 1.30 (1.12 to | 1.22 (0.84 to | 52.80 (41.67  | 59.34 (47.21  | 0.41 (0.25 to |
| 47 | Kingdom      | (197.49 to    | (214.96 to    | 0.21)         | 1.18)         | 1.44)         | 1.59)         | to 65.37)     | to 72.73)     | 0.57)         |
| 48 |              |               |               |               |               |               |               |               |               |               |
| 49 |              |               |               |               |               |               |               |               |               |               |
| 50 |              |               |               |               |               |               |               |               |               |               |
| 51 |              |               |               |               |               |               |               |               |               |               |
| 52 |              |               |               |               |               |               |               |               |               |               |
| 53 |              |               |               |               |               |               |               |               |               |               |
| 54 |              |               |               |               |               |               |               |               |               |               |
| 55 |              |               |               |               |               |               |               |               |               |               |
| 56 |              |               |               |               |               |               |               |               |               |               |
| 57 |              |               |               |               |               |               |               |               |               |               |
| 58 |              |               |               |               |               |               |               |               |               |               |
| 59 |              |               |               |               |               |               |               |               |               |               |
| 60 |              |               |               |               |               |               |               |               |               |               |

|    |                |               |               |               |               |               |               |               |               |               |
|----|----------------|---------------|---------------|---------------|---------------|---------------|---------------|---------------|---------------|---------------|
| 1  |                |               |               |               |               |               |               |               |               |               |
| 2  |                |               |               |               |               |               |               |               |               |               |
| 3  |                | 251.35)       | 267.14)       |               |               |               |               |               |               |               |
| 4  |                |               |               |               |               |               |               |               |               |               |
| 5  | United         |               |               |               |               |               |               |               |               |               |
| 6  | Republic of    | 7.20 (5.89 to | 7.76 (6.36 to | 0.22 (0.10 to | 0.58 (0.40 to | 0.60 (0.41 to | 0.38 (0.19 to | 19.56 (13.24  | 18.91 (12.48  | 0.25 (0.07 to |
| 7  | Tanzania       | 8.90)         | 9.50)         | 0.35)         | 0.81)         | 0.89)         | 0.57)         | to 32.21)     | to 26.55)     | 0.43)         |
| 8  |                |               |               |               |               |               |               |               |               |               |
| 9  | United States  | 343.12        | 193.07        | -1.59 (-2.08  | 0.67 (0.60 to | 1.02 (0.80 to | 1.80 (1.52 to | 64.72 (47.50  | 49.82 (40.25  | -0.48 (-0.78  |
| 10 | of America     | (295.81 to    | (179.65 to    | to -1.09)     | 0.82)         | 1.11)         | 2.07)         | to 84.88)     | to 60.19)     | to -0.18)     |
| 11 |                | 394.51)       | 206.87)       |               |               |               |               |               |               |               |
| 12 | United States  | 31.96 (26.73  | 33.22 (27.69  | 0.23 (0.16 to | 0.81 (0.56 to | 0.45 (0.34 to | -2.32 (-2.66  | 26.35 (19.55  | 15.91 (12.54  | -2.03 (-2.27  |
| 13 | Virgin Islands | to 38.19)     | to 39.97)     | 0.31)         | 1.02)         | 0.59)         | to -1.99)     | to 32.66)     | to 20.17)     | to -1.78)     |
| 14 |                |               |               |               |               |               |               |               |               |               |
| 15 | Uruguay        | 17.66 (14.59  | 17.41 (14.35  | -0.17 (-0.21  | 0.27 (0.23 to | 0.41 (0.35 to | 1.10 (0.62 to | 9.71 (8.22 to | 12.78 (11.11  | 0.63 (0.27 to |
| 16 |                | to 21.30)     | to 21.13)     | to -0.13)     | 0.37)         | 0.47)         | 1.58)         | 12.16)        | to 14.58)     | 0.98)         |
| 17 |                |               |               |               |               |               |               |               |               |               |
| 18 | Uzbekistan     | 74.25 (62.30  | 75.79 (63.42  | -0.02 (-0.05  | 0.28 (0.20 to | 0.29 (0.23 to | -0.33 (-0.58  | 23.48 (17.64  | 21.90 (17.37  | -0.47 (-0.58  |
| 19 |                | to 88.98)     | to 90.50)     | to 0.01)      | 0.39)         | 0.39)         | to -0.09)     | to 29.48)     | to 27.16)     | to -0.36)     |
| 20 |                |               |               |               |               |               |               |               |               |               |
| 21 | Vanuatu        | 4.27 (3.44 to | 3.94 (3.23 to | -0.42 (-0.59  | 1.22 (0.69 to | 0.84 (0.52 to | -1.74 (-1.94  | 34.45 (18.68  | 25.36 (15.29  | -1.58 (-1.80  |
| 22 |                | 5.21)         | 4.77)         | to -0.24)     | 2.03)         | 1.24)         | to -1.54)     | to 54.26)     | to 38.79)     | to -1.36)     |
| 23 | Venezuela      | 29.50 (25.29  | 29.03 (24.54  | -0.01 (-0.05  | 0.25 (0.17 to | 0.15 (0.11 to | -2.32 (-2.82  | 12.00 (9.33   | 8.87 (6.84 to | -1.36 (-1.66  |
| 24 | (Bolivarian    | to 33.94)     | to 34.19)     | to 0.03)      | 0.29)         | 0.21)         | to -1.82)     | to 14.20)     | 11.26)        | to -1.05)     |
| 25 | Republic of)   |               |               |               |               |               |               |               |               |               |
| 26 |                |               |               |               |               |               |               |               |               |               |
| 27 | Viet Nam       | 9.12 (7.04 to | 18.35 (14.68  | 2.72 (2.05 to | 0.58 (0.30 to | 0.22 (0.15 to | -3.98 (-4.35  | 13.87 (8.53   | 7.60 (5.65 to | -2.48 (-2.72  |
| 28 |                | 11.43)        | to 22.55)     | 3.39)         | 0.88)         | 0.32)         | to -3.61)     | to 18.99)     | 9.80)         | to -2.23)     |
| 29 |                |               |               |               |               |               |               |               |               |               |
| 30 | Yemen          | 23.40 (18.89  | 28.03 (22.65  | 0.95 (0.76 to | 0.28 (0.15 to | 0.33 (0.22 to | 0.85 (0.73 to | 10.64 (7.11   | 12.40 (9.18   | 0.79 (0.66 to |
| 31 |                | to 29.12)     | to 34.94)     | 1.14)         | 0.52)         | 0.52)         | 0.97)         | to 15.89)     | to 16.77)     | 0.93)         |
| 32 |                |               |               |               |               |               |               |               |               |               |
| 33 | Zambia         | 6.36 (5.26 to | 8.42 (6.92 to | 0.86 (0.63 to | 0.86 (0.60 to | 0.70 (0.51 to | -0.86 (-1.04  | 27.59 (16.02  | 20.49 (14.47  | -1.05 (-1.14  |
| 34 |                | 7.78)         | 10.46)        | 1.10)         | 1.32)         | 0.94)         | to -0.69)     | to 45.42)     | to 27.66)     | to -0.96)     |
| 35 | Zimbabwe       | 8.69 (7.15 to | 8.91 (7.29 to | 0.21 (0.11 to | 0.47 (0.36 to | 0.58 (0.35 to | 0.96 (0.85 to | 14.20 (10.79  | 17.38 (10.28  | 1.22 (0.99 to |
| 36 |                | 10.74)        | 11.06)        | 0.30)         | 0.64)         | 0.86)         | 1.06)         | to 19.20)     | to 25.35)     | 1.44)         |

Abbreviations: CI=confidence interval. DALY=disability adjusted life year.  
EAPC=estimated annual percentage change. UI=uncertainty interval.



**Supplementary Table 4** Incident cases, YLLs and YLDs of inflammatory bowel disease (IBD) in 1990 and 2019 and their percentage change from 1990 to 2019

| Characteristics         | Incident cases                  |                                 |                                     | YLLs                            |                                 |                                     | YLDs                            |                                 |                                     |
|-------------------------|---------------------------------|---------------------------------|-------------------------------------|---------------------------------|---------------------------------|-------------------------------------|---------------------------------|---------------------------------|-------------------------------------|
|                         | 1990 No.<br>(95%UI)             | 2019 No.<br>(95%UI)             | Percentage<br>change (%)<br>(95%UI) | 1990 No.<br>(95%UI)             | 2019 No.<br>(95%UI)             | Percentage<br>change (%)<br>(95%UI) | 1990 No.<br>(95%UI)             | 2019 No.<br>(95%UI)             | Percentage<br>change (%)<br>(95%UI) |
| Global                  | 293572<br>(257425 to<br>336651) | 404552<br>(360521 to<br>456478) | 37.80 (33.91<br>to 41.98)           | 757137<br>(557008 to<br>914270) | 895798<br>(779706 to<br>999120) | 18.31 (-1.81<br>to 52.08)           | 491137<br>(326283 to<br>678806) | 726701<br>(487015 to<br>993466) | 47.96 (43.96<br>to 52.28)           |
| Sex                     |                                 |                                 |                                     |                                 |                                 |                                     |                                 |                                 |                                     |
| Male                    | 153074<br>(133344 to<br>174640) | 213814<br>(189759 to<br>241304) | 39.68 (36.00<br>to 43.73)           | 370299<br>(264345 to<br>462642) | 450214<br>(368766 to<br>507382) | 21.58 (-1.85<br>to 53.89)           | 230665<br>(152583 to<br>318772) | 352534<br>(235403 to<br>486701) | 52.83 (48.57<br>to 57.83)           |
| Female                  | 140498<br>(123361 to<br>161173) | 190738<br>(171154 to<br>213778) | 35.76 (31.29<br>to 39.92)           | 386839<br>(242819 to<br>477114) | 445584<br>(372799 to<br>510194) | 15.19 (-5.95<br>to 67.02)           | 260473<br>(173833 to<br>359493) | 374167<br>(251188 to<br>513406) | 43.65 (39.16<br>to 48.19)           |
| SIDI quintile           |                                 |                                 |                                     |                                 |                                 |                                     |                                 |                                 |                                     |
| High                    | 171841<br>(151878 to<br>195746) | 196451<br>(179556 to<br>217510) | 14.32 (9.64<br>to 19.56)            | 139690<br>(129255 to<br>171300) | 268406<br>(221318 to<br>288862) | 92.14 (36.87<br>to 107.98)          | 275795<br>(183466 to<br>378544) | 334924<br>(229615 to<br>452309) | 21.44 (15.85<br>to 27.66)           |
| High-middle             | 71474<br>(62545 to<br>81510)    | 94553<br>(84101 to<br>107156)   | 32.29 (29.05<br>to 36.06)           | 149876<br>(130428 to<br>171308) | 151980<br>(137423 to<br>168345) | 1.40 (-11.32<br>to 17.80)           | 138460<br>(92476 to<br>192296)  | 200814<br>(133980 to<br>276597) | 45.03 (40.58<br>to 50.41)           |
| Middle                  | 27459<br>(23259 to<br>32310)    | 59817<br>(50973 to<br>70648)    | 117.84<br>(108.98 to<br>127.40)     | 201655<br>(144191 to<br>243718) | 167470<br>(141946 to<br>187219) | -16.95<br>(-32.64 to<br>19.35)      | 46484<br>(30292 to<br>65651)    | 123619<br>(80636 to<br>174495)  | 165.94<br>(155.28 to<br>177.70)     |
| Low-middle              | 17434<br>(14532 to<br>20935)    | 36681<br>(30862 to<br>44031)    | 110.40<br>(104.05 to<br>116.72)     | 179309<br>(103608 to<br>244139) | 184730<br>(144128 to<br>223656) | 3.02 (-21.85<br>to 54.27)           | 23711<br>(15318 to<br>33814)    | 51855<br>(33811 to<br>73563)    | 118.69<br>(110.14 to<br>127.95)     |
| Low                     | 5279 (4395<br>to 6379)          | 12215<br>(10164 to<br>14793)    | 131.41<br>(126.67 to<br>136.00)     | 86179<br>(39359 to<br>140538)   | 122638<br>(86434 to<br>167342)  | 42.31 (-5.62<br>to 150.88)          | 6540 (4199<br>to 9362)          | 15228 (9694<br>to 22000)        | 132.87<br>(123.17 to<br>142.33)     |
| GBD region              |                                 |                                 |                                     |                                 |                                 |                                     |                                 |                                 |                                     |
| Andean Latin<br>America | 472 (402 to<br>550)             | 1128 (975 to<br>1314)           | 138.95<br>(128.76 to<br>150.71)     | 10085 (4860<br>to 16590)        | 4311 (3237<br>to 5564)          | -57.25<br>(-76.23 to<br>-4.50)      | 682 (439 to<br>990)             | 1631 (1060<br>to 2311)          | 139.04<br>(119.92 to<br>161.86)     |
| Australasia             | 2979 (2556<br>to 3481)          | 6446 (5755<br>to 7212)          | 116.39<br>(101.08 to<br>132.24)     | 2212 (1997<br>to 2709)          | 5448 (4212<br>to 6156)          | 146.25 (61.5<br>to 182.75)          | 3590 (2340<br>to 5079)          | 7879 (5232<br>to 10860)         | 119.48<br>(94.61 to<br>145.44)      |
| Caribbean               | 677 (580 to<br>796)             | 1312 (1121<br>to 1571)          | 93.82 (84.67<br>to 103.42)          | 6186 (3853<br>to 10389)         | 6861 (4657<br>to 9603)          | 10.92<br>(-26.38 to<br>51.60)       | 1266 (836<br>to 1782)           | 2038 (1332<br>to 2893)          | 61.05 (49.16<br>to 73.60)           |
| Central Asia            | 3514 (2995<br>to 4146)          | 6461 (5487<br>to 7637)          | 83.87 (77.84<br>to 90.36)           | 9604 (7718<br>to 11578)         | 9458 (8184<br>to 10959)         | -1.52<br>(-20.39 to<br>17.35)       | 6348 (4181<br>to 9075)          | 10778 (7154<br>to 15134)        | 69.79 (58.22<br>to 81.49)           |



|    |                |             |              |              |            |             |              |              |              |              |
|----|----------------|-------------|--------------|--------------|------------|-------------|--------------|--------------|--------------|--------------|
| 1  |                |             |              |              |            |             |              |              |              |              |
| 2  |                |             |              |              |            |             |              |              |              |              |
| 3  |                |             |              |              |            | 25.90)      |              |              |              |              |
| 4  |                |             |              |              |            |             |              |              |              |              |
| 5  |                | 20997       | 14809        | -29.47       | 19517      | 20261       |              | 42029        | 34433        | -18.07       |
| 6  | Central Europe | (18082 to   | (13443 to    | (-33.69 to   | (17440 to  | (17005 to   | 3.81 (-12.56 | (28219 to    | (23103 to    | (-23.95 to   |
| 7  |                | 24170)      | 16391)       | -24.67)      | 21350)     | 23354)      | to 21.14)    | 58172)       | 46581)       | -11.37)      |
| 8  |                |             |              |              | 11909      | 23887       | 100.58       |              |              |              |
| 9  | Central Latin  | 3968 (3402  | 6754 (5834   | 70.22 (64.07 |            |             |              | 6187 (4023   | 12291 (8076  | 98.64 (90.00 |
| 10 | America        | to 4618)    | to 7826)     | to 77.19)    | (10476 to  | (19416 to   | (62.63 to    | to 8802)     | to 17492)    | to 107.98)   |
| 11 |                |             |              |              | 13363)     | 28208)      | 141.31)      |              |              |              |
| 12 |                |             |              | 201.42       |            |             | 59.71        |              |              | 151.34       |
| 13 | Central        | 381 (318 to | 1150 (955 to |              | 9036 (4403 | 14431 (9735 |              | 455 (291 to  | 1142 (725 to |              |
| 14 | Sub-Saharan    | 469)        | 1400)        | (188.00 to   | to 17181)  | to 21338)   | (-15.47 to   | 663)         | 1644)        | (136.85 to   |
| 15 | Africa         |             |              | 216.18)      |            |             | 217.75)      |              |              | 168.27)      |
| 16 |                | 17567       | 52319        | 197.82       | 202402     | 101852      | -49.68       | 37829        | 138111       | 265.09       |
| 17 |                |             |              |              |            |             |              |              |              |              |
| 18 | East Asia      | (14627 to   | (44680 to    | (178.88 to   | (132058 to | (80904 to   | (-63.19 to   | (24646 to    | (90529 to    | (244.38 to   |
| 19 |                | 20802)      | 61455)       | 220.44)      | 259475)    | 117925)     | -16.68)      | 53906)       | 194304)      | 290.80)      |
| 20 |                | 18150       | 19500        |              | 39012      | 42550       |              | 33920        | 34573        |              |
| 21 | Eastern Europe | (15600 to   | (16838 to    | 7.44 (5.08   | (29086 to  | (36378 to   | 9.07 (-8.79  | (22663 to    | (23253 to    | 1.92 (-2.34  |
| 22 |                | 21209)      | 22671)       | to 9.90)     | 45400)     | 48906)      | to 41.38)    | 47811)       | 48708)       | to 6.15)     |
| 23 |                |             |              |              |            |             |              |              |              |              |
| 24 | Eastern        |             |              | 168.96       | 34323      | 49854       | 45.25        |              |              | 165.68       |
| 25 | Sub-Saharan    | 1092 (908   | 2938 (2449   |              | (15796 to  | (36274 to   | (-23.18 to   | 1157 (736 to | 3074 (1958   |              |
| 26 | Africa         | to 1315)    | to 3538)     | (163.69 to   | 66928)     | 71146)      | 204.58)      | 1664)        | to 4469)     | (159.54 to   |
| 27 |                |             |              | 175.74)      |            |             |              |              |              | 172.36)      |
| 28 |                | 18105       | 27084        |              | 14265      | 10285 (8672 | -27.90       | 37434        | 68316        |              |
| 29 | High-income    | (15391 to   | (23870 to    | 49.59 (40.22 | (11234 to  | to 13984)   | (-41.19 to   | (24881 to    | (45509 to    | 82.50 (67.39 |
| 30 | Asia Pacific   | 21422)      | 30621)       | to 59.35)    | 15903)     |             | 11.39)       | 52603)       | 94577)       | to 99.60)    |
| 31 |                | 107616      | 99611        | -7.44        | 48899      | 111196      | 127.40       | 160173       | 134037       | -16.32       |
| 32 | High-income    | (94147 to   | (91945 to    | (-13.45 to   | (45188 to  | (90610 to   | (58.53 to    | (106818 to   | (92136 to    | (-22.94 to   |
| 33 | North America  | 123884)     | 109000)      | -0.48)       | 60393)     | 118997)     | 147.53)      | 221989)      | 178957)      | -9.00)       |
| 34 |                |             |              |              |            |             |              |              |              |              |
| 35 |                |             |              |              |            |             |              |              |              |              |
| 36 | North Africa   | 8107 (7040  | 22722        | 180.29       | 21634      | 30142       | 39.33 (-4.16 | 13804 (8984  | 42612        | 208.69       |
| 37 | and Middle     | to 9204)    | (19277 to    | (162.24 to   | (13448 to  | (25222 to   | to 131.21)   | to 19350)    | (27805 to    | (184.84 to   |
| 38 | East           |             | 26952)       | 198.18)      | 31651)     | 36090)      |              |              | 59873)       | 233.72)      |
| 39 |                |             |              |              |            |             |              |              |              |              |
| 40 |                | 22 (18 to   | 63 (52 to    | 181.23       | 1003 (571  | 1628 (1040  | 62.31 (1.40  | 33 (20 to    | 69 (43 to    | 109.64       |
| 41 | Oceania        | 27)         | 77)          | (166.43 to   | to 1593)   | to 2510)    | to 173.45)   | 48)          | 102)         | (96.04 to    |
| 42 |                |             |              | 197.89)      |            |             |              |              |              | 124.81)      |
| 43 |                | 18439       | 39705        | 115.33       | 146986     | 170233      | 15.82        | 24461        | 51744        | 111.54       |
| 44 |                |             |              |              |            |             |              |              |              |              |
| 45 | South Asia     | (15169 to   | (32943 to    | (107.88 to   | (82781 to  | (122056 to  | (-12.64 to   | (15784 to    | (33609 to    | (102.18 to   |
| 46 |                | 22582)      | 48454)       | 123.07)      | 202629)    | 222489)     | 63.63)       | 35449)       | 74915)       | 121.79)      |
| 47 |                |             |              |              |            |             |              |              |              |              |
| 48 |                |             |              | 164.62       | 42561      | 38819       | -8.79        |              |              | 185.53       |
| 49 | Southeast Asia | 1882 (1527  | 4980 (4182   |              | (28111 to  | (32029 to   | (-30.14 to   | 2755 (1714   | 7867 (5022   |              |
| 50 |                | to 2270)    | to 5972)     | (151.61 to   | 54072)     | 46584)      | 30.72)       | to 4108)     | to 11568)    | (161.80 to   |
| 51 |                |             |              | 181.06)      |            |             |              |              |              | 213.61)      |
| 52 | Southern Latin | 879 (742 to | 1382 (1177   | 57.15 (49.53 | 3794 (3293 | 5362 (4801  | 41.34 (23.31 | 1454 (944    | 2377 (1528   | 63.53 (47.49 |
| 53 | America        | 1030)       | to 1620)     | to 64.67)    | to 4092)   | to 6325)    | to 66.99)    | to 2091)     | to 3449)     | to 82.12)    |
| 54 |                |             |              |              |            |             |              |              |              | 113.43       |
| 55 | Southern       | 504 (423 to | 989 (837 to  | 96.29 (90.20 | 6007 (3712 | 7933 (6389  | 32.06 (-8.55 | 608 (390 to  | 1298 (837    |              |
| 56 | Sub-Saharan    | 608)        | 1188)        | to 103.76)   | to 8927)   | to 9558)    | to 122.99)   | 884)         | to 1875)     | (105.15 to   |
| 57 | Africa         |             |              |              |            |             |              |              |              | 123.26)      |
| 58 | Tropical Latin | 7826 (6859  | 12928        | 65.19 (58.70 | 16336      | 29155       | 78.46 (62.35 | 11387 (7351  | 17842        | 56.68 (48.38 |
| 59 | America        | to 8976)    | (11334 to    | to 72.03)    | (14276 to  | (26876 to   | to 103.68)   | to 15958)    | (11730 to    | to 65.76)    |
| 60 |                |             |              |              |            |             |              |              |              |              |

|    |                |            |            |              |           |            |              |            |              |
|----|----------------|------------|------------|--------------|-----------|------------|--------------|------------|--------------|
| 1  |                |            |            |              |           |            |              |            |              |
| 2  |                |            |            |              |           |            |              |            |              |
| 3  |                | 14874)     |            | 18011)       | 33305)    |            |              | 25165)     |              |
| 4  |                |            |            |              |           |            |              |            |              |
| 5  |                | 59081      | 78645      | 33.11 (30.56 | 81826     | 160823     | 103907       | 149868     | 44.23 (39.12 |
| 6  | Western Europe | (53733 to  | (71611 to  | to 35.75)    | (75154 to | (127602 to | (69789 to    | (101976 to | to 49.03)    |
| 7  |                | 65529)     | 86709)     |              | 106409)   | 175684)    | 141113)      | 202986)    |              |
| 8  |                |            |            |              |           |            |              |            |              |
| 9  | Western        | 1314 (1102 | 3628 (3028 | 176.18       | 29540     | 51309      | 73.69 (23.64 | 1657 (1057 | 4717 (3002   |
| 10 | Sub-Saharan    | to 1599)   | to 4401)   | (171.94 to   | (12580 to | (30850 to  | to 200.73)   | to 2403)   | to 6840)     |
| 11 | Africa         |            |            | 180.47)      | 46343)    | 73337)     |              |            | 190.47)      |

Abbreviations: GBD=Global Burden of Disease. SDI=Socio-demographic Index. UI=uncertainty interval. YLDs=years of life lived with disability. YLLs=years of life lost.

For peer review only

**Supplementary Table 5** Age-standardised incidence, YLL and YLD rates for inflammatory bowel disease (IBD) in 1990 and 2019 and their temporal trends from 1990 to 2019

| Characteristics       | Age-standardised incidence rate |                        |                        | Age-standardized YLL rate |                        |                        | Age-standardized YLD rate |                        |                        |
|-----------------------|---------------------------------|------------------------|------------------------|---------------------------|------------------------|------------------------|---------------------------|------------------------|------------------------|
|                       | per 100,000 population          |                        |                        | per 100,000 population    |                        |                        | per 100,000 population    |                        |                        |
|                       | 1990 No.<br>(95%UI)             | 2019 No.<br>(95%UI)    | EAPC No.<br>(95%CI)    | 1990 No.<br>(95%UI)       | 2019 No.<br>(95%UI)    | EAPC No.<br>(95%CI)    | 1990 No.<br>(95%UI)       | 2019 No.<br>(95%UI)    | EAPC No.<br>(95%CI)    |
| Global                | 6.10 (5.35 to 6.96)             | 4.97 (4.43 to 5.59)    | -0.60 (-0.73 to -0.48) | 16.47 (12.78 to 19.33)    | 11.35 (9.89 to 12.70)  | -1.33 (-1.37 to -1.30) | 10.73 (7.16 to 14.82)     | 8.80 (5.90 to 12.05)   | -0.62 (-0.70 to -0.53) |
| Sex                   |                                 |                        |                        |                           |                        |                        |                           |                        |                        |
| Male                  | 6.39 (5.60 to 7.29)             | 5.30 (4.72 to 5.99)    | -0.55 (-0.68 to -0.43) | 17.08 (12.95 to 20.96)    | 11.98 (9.82 to 13.45)  | -1.29 (-1.32 to -1.27) | 10.32 (6.91 to 14.27)     | 8.66 (5.80 to 11.93)   | -0.53 (-0.60 to -0.47) |
| Female                | 5.80 (5.12 to 6.61)             | 4.64 (4.16 to 5.20)    | -0.65 (-0.78 to -0.53) | 15.95 (10.70 to 19.09)    | 10.74 (8.88 to 12.44)  | -1.39 (-1.43 to -1.35) | 11.15 (7.43 to 15.41)     | 8.96 (6.02 to 12.30)   | -0.69 (-0.79 to -0.59) |
| SDI region            |                                 |                        |                        |                           |                        |                        |                           |                        |                        |
| High                  | 18.96 (16.73 to 21.58)          | 17.61 (16.03 to 19.41) | -0.16 (-0.30 to -0.01) | 14.41 (13.34 to 17.57)    | 15.64 (13.09 to 16.73) | 0.56 (0.41 to 0.70)    | 29.54 (19.66 to 40.6)     | 27.29 (18.55 to 37.18) | -0.30 (-0.39 to -0.21) |
| High-middle           | 6.12 (5.36 to 6.99)             | 5.58 (4.97 to 6.28)    | -0.35 (-0.45 to -0.24) | 13.87 (12.06 to 15.79)    | 8.37 (7.56 to 9.33)    | -1.99 (-2.11 to -1.88) | 12.05 (8.08 to 16.72)     | 10.97 (7.26 to 15.12)  | -0.26 (-0.40 to -0.13) |
| Middle                | 1.83 (1.58 to 2.15)             | 2.27 (1.94 to 2.68)    | 1.07 (0.95 to 1.18)    | 14.68 (11.06 to 17.93)    | 7 (5.95 to 7.79)       | -2.77 (-2.85 to -2.69) | 3.43 (2.26 to 4.84)       | 4.61 (3.01 to 6.52)    | 1.22 (1.01 to 1.43)    |
| Low-middle            | 2.00 (1.70 to 2.40)             | 2.21 (1.88 to 2.65)    | 0.46 (0.35 to 0.57)    | 20.36 (13.37 to 27.43)    | 12.15 (9.66 to 14.61)  | -1.99 (-2.09 to -1.90) | 2.93 (1.93 to 4.16)       | 3.22 (2.12 to 4.56)    | 0.50 (0.38 to 0.62)    |
| Low                   | 1.46 (1.23 to 1.77)             | 1.52 (1.29 to 1.83)    | 0.37 (0.31 to 0.44)    | 20.24 (12.52 to 27.74)    | 15.18 (11.82 to 19.54) | -1.08 (-1.14 to -1.02) | 1.95 (1.26 to 2.82)       | 2.02 (1.32 to 2.88)    | 0.28 (0.19 to 0.37)    |
| GBD region            |                                 |                        |                        |                           |                        |                        |                           |                        |                        |
| Andean Latin America  | 1.63 (1.41 to 1.91)             | 1.82 (1.57 to 2.12)    | -0.05 (-0.29 to 0.20)  | 23.76 (13.24 to 36.33)    | 7.15 (5.41 to 9.17)    | -4.50 (-5.07 to -3.92) | 2.6 (1.67 to 3.8)         | 2.68 (1.74 to 3.79)    | 0.05 (0.01 to 0.08)    |
| Australasia           | 13.56 (11.64 to 15.80)          | 20.03 (17.79 to 22.57) | 0.94 (0.72 to 1.16)    | 9.98 (9.01 to 12.07)      | 11.54 (8.93 to 13.01)  | 1.11 (0.82 to 1.41)    | 16.21 (10.57 to 22.95)    | 23.45 (15.53 to 32.51) | 0.86 (0.63 to 1.09)    |
| Caribbean             | 2.11 (1.83 to 2.49)             | 2.63 (2.24 to 3.14)    | 0.49 (0.34 to 0.64)    | 19.10 (12.84 to 29.41)    | 14.19 (9.36 to 20.49)  | -1.13 (-1.33 to -0.93) | 4.28 (2.83 to 6.06)       | 4.02 (2.62 to 5.72)    | -0.06 (-0.14 to 0.01)  |
| Central Asia          | 5.99 (5.13 to 7.07)             | 6.9 (5.87 to 8.13)     | 0.50 (0.46 to 0.53)    | 14.63 (11.46 to 17.20)    | 10.56 (9.16 to 12.18)  | -1.41 (-1.54 to -1.29) | 11.48 (7.62 to 16.46)     | 11.7 (7.77 to 16.39)   | 0.08 (0.04 to 0.11)    |
| Central Europe        | 15.78 (13.61 to 18.19)          | 11.59 (10.51 to 12.81) | -1.38 (-1.76 to -0.99) | 15.87 (13.6 to 17.59)     | 11.95 (10.00 to 13.79) | -0.91 (-1.11 to -0.72) | 30.41 (20.26 to 42.11)    | 23.89 (15.95 to 32.56) | -1.16 (-1.53 to -0.79) |
| Central Latin America | 3.16 (2.74 to 3.66)             | 2.64 (2.29 to 3.06)    | -0.70 (-0.87 to -0.54) | 9.15 (8.21 to 10.10)      | 9.79 (7.96 to 11.55)   | 0.81 (0.47 to 1.16)    | 5.69 (3.74 to 8.02)       | 4.89 (3.22 to 6.96)    | -0.50 (-0.58 to -0.42) |
| Central Sub-Saharan   | 1.04 (0.88 to 1.26)             | 1.26 (1.06 to 1.52)    | 0.64 (0.59 to 0.70)    | 20.92 (13.38 to 31.16)    | 16.45 (11.73 to 22.99) | -0.84 (-0.92 to -0.75) | 1.33 (0.87 to 1.94)       | 1.32 (0.85 to 1.91)    | -0.16 (-0.35 to 0.04)  |

|    |                |            |              |              |              |               |              |              |              |               |
|----|----------------|------------|--------------|--------------|--------------|---------------|--------------|--------------|--------------|---------------|
| 1  |                |            |              |              |              |               |              |              |              |               |
| 2  |                |            |              |              |              |               |              |              |              |               |
| 3  | Africa         |            |              |              |              |               |              |              |              |               |
| 4  |                |            |              |              |              |               |              |              |              |               |
| 5  | East Asia      | 1.45 (1.22 | 2.95 (2.55   | 2.54 (2.39   | 20.78 (14.55 | 6.12 (4.90    | -4.52 (-4.79 | 3.45 (2.26   | 6.95 (4.57   | 2.74 (2.37 to |
| 6  |                | to 1.71)   | to 3.43)     | to 2.69)     | to 26.09)    | to 7.03)      | to -4.24)    | to 4.87)     | to 9.69)     | 3.12)         |
| 7  |                | 7.10 (6.12 | 7.34 (6.34   | 0.07 (-0.02  | 14.85 (11.23 | 14.46 (12.37  | -0.56 (-0.82 | 12.83 (8.55  | 12.21 (8.15  | 0.05 (-0.07   |
| 8  | Eastern Europe | to 8.29)   | to 8.55)     | to 0.17)     | to 17.29)    | to 16.65)     | to -0.30)    | to 18.05)    | to 17.24)    | to 0.17)      |
| 9  |                |            |              |              |              |               |              |              |              |               |
| 10 | Eastern        | 0.89 (0.76 | 1.04 (0.88   | 0.55 (0.48   | 21.56 (15.07 | 18.27 (13.48  | -0.51 (-0.59 | 1.02 (0.66   | 1.17 (0.76   | 0.44 (0.40 to |
| 11 | Sub-Saharan    | to 1.07)   | to 1.25)     | to 0.61)     | to 32.54)    | to 24.41)     | to -0.43)    | to 1.46)     | to 1.67)     | 0.48)         |
| 12 | Africa         |            |              |              |              |               |              |              |              |               |
| 13 |                |            |              |              |              |               |              |              |              |               |
| 14 | High-income    | 9.25 (7.88 | 14.93 (13.14 | 1.10 (0.84   | 7.85 (6.04   | 2.74 (2.35    | -4.07 (-4.38 | 18.58 (12.28 | 31.81 (21.06 | 1.11 (0.73 to |
| 15 | Asia Pacific   | to 10.91)  | to 16.93)    | to 1.37)     | to 8.80)     | to 3.86)      | to -3.77)    | to 26.01)    | to 44.06)    | 1.49)         |
| 16 |                | 34.88      |              |              |              |               |              |              |              |               |
| 17 | High-income    | (30.59 to  | 24.51 (22.65 | -0.82 (-1.20 | 14.94 (13.84 | 20.18 (16.54  | 1.26 (1.03   | 50.69 (33.71 | 31.1 (21.34  | -1.28 (-1.69  |
| 18 | North America  | 40.02)     | to 26.77)    | to -0.45)    | to 18.40)    | to 21.51)     | to 1.50)     | to 70.19)    | to 41.87)    | to -0.86)     |
| 19 |                |            |              |              |              |               |              |              |              |               |
| 20 | North Africa   |            |              |              |              |               |              |              |              |               |
| 21 | and Middle     | 2.95 (2.59 | 3.74 (3.19   | 0.62 (0.53   | 8.82 (5.96   | 6.06 (5.08    | -1.32 (-1.36 | 5.55 (3.65   | 7.21 (4.74   | 0.88 (0.76 to |
| 22 | East           | to 3.38)   | to 4.45)     | to 0.72)     | to 12.45)    | to 7.15)      | to -1.29)    | to 7.72)     | to 10.1)     | 1.00)         |
| 23 |                |            |              |              |              |               |              |              |              |               |
| 24 |                | 0.44 (0.36 | 0.56 (0.47   | 0.87 (0.76   | 19.89 (12.45 | 14.30 (9.82   | -1.32 (-1.41 | 0.71 (0.45   | 0.63 (0.40   | -0.53 (-0.72  |
| 25 | Oceania        | to 0.52)   | to 0.67)     | to 0.98)     | to 28.10)    | to 20.46)     | to -1.23)    | to 1.03)     | to 0.93)     | to -0.34)     |
| 26 |                |            |              |              |              |               |              |              |              |               |
| 27 | South Asia     | 2.15 (1.79 | 2.32 (1.93   | 0.47 (0.31   | 18.45 (11.93 | 10.91 (7.96   | -2.10 (-2.23 | 3.02 (1.97   | 3.08 (2.01   | 0.25 (0.09 to |
| 28 |                | to 2.64)   | to 2.84)     | to 0.63)     | to 26.19)    | to 14.27)     | to -1.97)    | to 4.38)     | to 4.49)     | 0.40)         |
| 29 |                |            |              |              |              |               |              |              |              |               |
| 30 | Southeast Asia | 0.46 (0.38 | 0.70 (0.59   | 1.45 (1.27   | 12.43 (7.76  | 6.35 (5.08    | -2.69 (-2.85 | 0.73 (0.46   | 1.09 (0.7 to | 1.52 (1.22 to |
| 31 |                | to 0.56)   | to 0.84)     | to 1.63)     | to 15.13)    | to 7.61)      | to -2.53)    | to 1.09)     | 1.60)        | 1.83)         |
| 32 | Southern Latin | 1.82 (1.54 | 1.92 (1.63   | 0.24 (0.15   | 8.05 (7.00   | 6.85 (6.15    | -0.71 (-0.86 | 3.05 (1.98   | 3.21 (2.06   | 0.23 (0.04 to |
| 33 | America        | to 2.13)   | to 2.26)     | to 0.34)     | to 8.69)     | to 8.08)      | to -0.56)    | to 4.38)     | to 4.68)     | 0.42)         |
| 34 |                |            |              |              |              |               |              |              |              |               |
| 35 | Southern       | 1.30 (1.10 | 1.37 (1.17   | 0.13 (0.06   | 13.43 (9.33  | 11.79 (9.6 to | -0.20 (-0.55 | 1.67 (1.08   | 1.87 (1.22   | 0.48 (0.41 to |
| 36 | Sub-Saharan    | to 1.56)   | to 1.65)     | to 0.20)     | to 17.23)    | 13.95)        | to 0.15)     | to 2.41)     | to 2.70)     | 0.55)         |
| 37 | Africa         |            |              |              |              |               |              |              |              |               |
| 38 | Tropical Latin | 6.09 (5.40 | 5.25 (4.60   | -0.55 (-0.59 | 13.65 (11.97 | 12.09 (11.13  | -0.18 (-0.34 | 9.72 (6.37   | 7.17 (4.71   | -0.83 (-1.04  |
| 39 | America        | to 6.93)   | to 6.03)     | to -0.51)    | to 14.87)    | to 13.83)     | to -0.02)    | to 13.54)    | to 10.10)    | to -0.63)     |
| 40 |                | 13.98      |              |              |              |               |              |              |              |               |
| 41 |                | (12.67 to  | 16.94 (15.33 | 0.60 (0.55   | 16.07 (14.83 | 18.85 (15.12  | 0.92 (0.72   | 23.17 (15.52 | 27.93 (19.01 | 0.38 (0.26 to |
| 42 | Western Europe | 15.48)     | to 18.73)    | to 0.65)     | to 20.58)    | to 20.42)     | to 1.11)     | to 31.53)    | to 38.12)    | 0.49)         |
| 43 |                |            |              |              |              |               |              |              |              |               |
| 44 |                |            |              |              |              |               |              |              |              |               |
| 45 | Western        | 1.01 (0.86 | 1.17 (1.00   | 0.36 (0.22   | 18.33 (10.38 | 15.14 (10.25  | -0.69 (-0.80 | 1.37 (0.89   | 1.63 (1.06   | 0.78 (0.66 to |
| 46 | Sub-Saharan    | to 1.23)   | to 1.41)     | to 0.50)     | to 29.12)    | to 20.82)     | to -0.58)    | to 1.98)     | to 2.34)     | 0.90)         |
| 47 | Africa         |            |              |              |              |               |              |              |              |               |
| 48 |                |            |              |              |              |               |              |              |              |               |

Abbreviations: CI=confidence interval. EAPC=estimated annual percentage change. GBD=Global Burden of Disease. SDI=Socio-demographic Index. UI=uncertainty interval. YLD=years of life lived with disability. YLL=years of life lost.

## STROBE Statement—checklist of items that should be included in reports of observational studies

|                              | Item No | Recommendation                                                                                                                                                                                                                                                                                                                                                                                                                                                         | Page No |
|------------------------------|---------|------------------------------------------------------------------------------------------------------------------------------------------------------------------------------------------------------------------------------------------------------------------------------------------------------------------------------------------------------------------------------------------------------------------------------------------------------------------------|---------|
| <b>Title and abstract</b>    | 1       | (a) Indicate the study's design with a commonly used term in the title or the abstract                                                                                                                                                                                                                                                                                                                                                                                 | 1       |
|                              |         | (b) Provide in the abstract an informative and balanced summary of what was done and what was found                                                                                                                                                                                                                                                                                                                                                                    | 2       |
| <b>Introduction</b>          |         |                                                                                                                                                                                                                                                                                                                                                                                                                                                                        |         |
| Background/rationale         | 2       | Explain the scientific background and rationale for the investigation being reported                                                                                                                                                                                                                                                                                                                                                                                   | 4       |
| Objectives                   | 3       | State specific objectives, including any prespecified hypotheses                                                                                                                                                                                                                                                                                                                                                                                                       | 4       |
| <b>Methods</b>               |         |                                                                                                                                                                                                                                                                                                                                                                                                                                                                        |         |
| Study design                 | 4       | Present key elements of study design early in the paper                                                                                                                                                                                                                                                                                                                                                                                                                | 5       |
| Setting                      | 5       | Describe the setting, locations, and relevant dates, including periods of recruitment, exposure, follow-up, and data collection                                                                                                                                                                                                                                                                                                                                        | 5       |
| Participants                 | 6       | (a) <i>Cohort study</i> —Give the eligibility criteria, and the sources and methods of selection of participants. Describe methods of follow-up<br><i>Case-control study</i> —Give the eligibility criteria, and the sources and methods of case ascertainment and control selection. Give the rationale for the choice of cases and controls<br><i>Cross-sectional study</i> —Give the eligibility criteria, and the sources and methods of selection of participants | 5       |
|                              |         | (b) <i>Cohort study</i> —For matched studies, give matching criteria and number of exposed and unexposed<br><i>Case-control study</i> —For matched studies, give matching criteria and the number of controls per case                                                                                                                                                                                                                                                 |         |
| Variables                    | 7       | Clearly define all outcomes, exposures, predictors, potential confounders, and effect modifiers. Give diagnostic criteria, if applicable                                                                                                                                                                                                                                                                                                                               | 5-6     |
| Data sources/<br>measurement | 8*      | For each variable of interest, give sources of data and details of methods of assessment (measurement). Describe comparability of assessment methods if there is more than one group                                                                                                                                                                                                                                                                                   | 5-6     |
| Bias                         | 9       | Describe any efforts to address potential sources of bias                                                                                                                                                                                                                                                                                                                                                                                                              | 6       |
| Study size                   | 10      | Explain how the study size was arrived at                                                                                                                                                                                                                                                                                                                                                                                                                              | 6       |
| Quantitative variables       | 11      | Explain how quantitative variables were handled in the analyses. If applicable, describe which groupings were chosen and why                                                                                                                                                                                                                                                                                                                                           | 5-6     |
| Statistical methods          | 12      | (a) Describe all statistical methods, including those used to control for confounding                                                                                                                                                                                                                                                                                                                                                                                  | 6       |
|                              |         | (b) Describe any methods used to examine subgroups and interactions                                                                                                                                                                                                                                                                                                                                                                                                    | 6       |
|                              |         | (c) Explain how missing data were addressed                                                                                                                                                                                                                                                                                                                                                                                                                            | 6       |
|                              |         | (d) <i>Cohort study</i> —If applicable, explain how loss to follow-up was addressed<br><i>Case-control study</i> —If applicable, explain how matching of cases and controls was addressed<br><i>Cross-sectional study</i> —If applicable, describe analytical methods taking account of sampling strategy                                                                                                                                                              |         |
|                              |         | (e) Describe any sensitivity analyses                                                                                                                                                                                                                                                                                                                                                                                                                                  | 6       |

Continued on next page

1  
2  
3  
4  
5  
6  
7  
8  
9  
10  
11  
12  
13  
14  
15  
16  
17  
18  
19  
20  
21  
22  
23  
24  
25  
26  
27  
28  
29  
30  
31  
32  
33  
34  
35  
36  
37  
38  
39  
40  
41  
42  
43  
44  
45  
46  
47  
48  
49  
50  
51  
52  
53  
54  
55  
56  
57  
58  
59  
60

| <b>Results</b>           |     |                                                                                                                                                                                                              |       |
|--------------------------|-----|--------------------------------------------------------------------------------------------------------------------------------------------------------------------------------------------------------------|-------|
| Participants             | 13* | (a) Report numbers of individuals at each stage of study—eg numbers potentially eligible, examined for eligibility, confirmed eligible, included in the study, completing follow-up, and analysed            | 6-10  |
|                          |     | (b) Give reasons for non-participation at each stage                                                                                                                                                         | 6-10  |
|                          |     | (c) Consider use of a flow diagram                                                                                                                                                                           | 6-10  |
| Descriptive data         | 14* | (a) Give characteristics of study participants (eg demographic, clinical, social) and information on exposures and potential confounders                                                                     | 6-10  |
|                          |     | (b) Indicate number of participants with missing data for each variable of interest                                                                                                                          | 6-10  |
|                          |     | (c) <i>Cohort study</i> —Summarise follow-up time (eg, average and total amount)                                                                                                                             | 6-10  |
| Outcome data             | 15* | <i>Cohort study</i> —Report numbers of outcome events or summary measures over time                                                                                                                          | 6-10  |
|                          |     | <i>Case-control study</i> —Report numbers in each exposure category, or summary measures of exposure                                                                                                         | 6-10  |
|                          |     | <i>Cross-sectional study</i> —Report numbers of outcome events or summary measures                                                                                                                           | 6-10  |
| Main results             | 16  | (a) Give unadjusted estimates and, if applicable, confounder-adjusted estimates and their precision (eg, 95% confidence interval). Make clear which confounders were adjusted for and why they were included | 6-10  |
|                          |     | (b) Report category boundaries when continuous variables were categorized                                                                                                                                    | 6-10  |
|                          |     | (c) If relevant, consider translating estimates of relative risk into absolute risk for a meaningful time period                                                                                             | 6-10  |
| Other analyses           | 17  | Report other analyses done—eg analyses of subgroups and interactions, and sensitivity analyses                                                                                                               | 6-10  |
| <b>Discussion</b>        |     |                                                                                                                                                                                                              |       |
| Key results              | 18  | Summarise key results with reference to study objectives                                                                                                                                                     | 10-11 |
| Limitations              | 19  | Discuss limitations of the study, taking into account sources of potential bias or imprecision. Discuss both direction and magnitude of any potential bias                                                   | 12    |
| Interpretation           | 20  | Give a cautious overall interpretation of results considering objectives, limitations, multiplicity of analyses, results from similar studies, and other relevant evidence                                   | 10-13 |
| Generalisability         | 21  | Discuss the generalisability (external validity) of the study results                                                                                                                                        | 13    |
| <b>Other information</b> |     |                                                                                                                                                                                                              |       |
| Funding                  | 22  | Give the source of funding and the role of the funders for the present study and, if applicable, for the original study on which the present article is based                                                | 14    |

\*Give information separately for cases and controls in case-control studies and, if applicable, for exposed and unexposed groups in cohort and cross-sectional studies.

**Note:** An Explanation and Elaboration article discusses each checklist item and gives methodological background and published examples of transparent reporting. The STROBE checklist is best used in conjunction with this article (freely available on the Web sites of PLoS Medicine at <http://www.plosmedicine.org/>, Annals of Internal Medicine at <http://www.annals.org/>, and Epidemiology at <http://www.epidem.com/>). Information on the STROBE Initiative is available at [www.strobe-statement.org](http://www.strobe-statement.org).
