# Supplementary material for: Global, regional and national burden of inflammatory bowel disease in 204 countries and territories from 1990 to 2019: a systematic analysis based on the Global Burden of Disease Study 2019
Source: PubMed Central journal article supplement — BMJ Open. 2023 Mar 28;13(3):e065186. doi: 10.1136/bmjopen-2022-065186 (PMC10069527; doi:10.1136/bmjopen-2022-065186), 2023-03-28
Supplement: bmjopen-2022-065186supp001.pdf [file bmjopen-2022-065186supp001.pdf]

Supplement to: **The global, regional and national burden of inflammatory bowel disease in 204 countries and territories from 1990 to 2019, based on Global Burden Disease Study 2019**

**Contents:**

**Supplementary Figures**

Supplementary Figure 1: Trends from 1990 to 2019 in number and age-standardised prevalence rate of IBD at the global level.

Supplementary Figure 2: The absolute number of deaths due to IBD for 204 countries and territories in 2019.

Supplementary Figure 3: The age-standardised death rate (per 100 000 population) of IBD for 204 countries and territories in 2019.

Supplementary Figure 4: The EAPC of age-standardised death rate for IBD in 204 countries and territories between 1990 and 2019.

Supplementary Figure 5: Trends from 1990 to 2019 in number and age-standardised death rate of IBD at the global level.

Supplementary Figure 6: The absolute number of DALYs due to IBD for 204 countries and territories in 2019.

Supplementary Figure 7: The absolute number of incident cases due to IBD for 204 countries and territories in 2019.

Supplementary Figure 8: The absolute number of YLLs due to IBD for 204 countries and territories in 2019.

Supplementary Figure 9: The absolute number of YLDs due to IBD for 204 countries and territories in 2019.

Supplementary Figure 10: The age-standardised DALY rate (per 100 000 population) of IBD for 204 countries and territories in 2019.

Supplementary Figure 11: The EAPC of age-standardised DALY rate for IBD in 204 countries and territories between 1990 and 2019.

Supplementary Figure 12: The EAPC of age-standardised incidence rate for IBD in 204 countries and territories between 1990 and 2019.

Supplementary Figure 13: The EAPC of age-standardised YLL rate for IBD in 204 countries and territories between 1990 and 2019.

Supplementary Figure 14: The EAPC of age-standardised YLD rate for IBD in 204 countries and territories between 1990 and 2019.

Supplementary Figure 15: Global counts and age-specific rates of YLLs and YLDs due to IBD across age group in 2019.

Supplementary Figure 16: Trends from 1990 to 2019 in number and age-standardised DALY rate of IBD at the global level.

### **Supplementary Tables**

Supplementary Table 1: Prevalent cases, deaths and disability adjusted life years (DALYs) of inflammatory bowel disease (IBD) in 1990 and 2019 and their percentage change from 1990 to 2019

Supplementary Table 2: Prevalent cases, deaths and disability adjusted life years (DALYs) for inflammatory bowel disease (IBD) by 204 countries or territories in 1990 and 2019, and their percentage change from 1990 to 2019.

Supplementary Table 3: Age-standardised prevalence, death and DALY rates for inflammatory bowel disease (IBD) by 204 countries or territories in 1990 and 2019, and their temporal trends from 1990 to 2019.

Supplementary Table 4: Incident cases, YLLs and YLDs of inflammatory bowel disease (IBD) in 1990 and 2019 and their percentage change from 1990 to 2019.

Supplementary Table 5: Age-standardised incidence, YLL and YLD rates for inflammatory bowel disease (IBD) in 1990 and 2019 and their temporal trends from 1990 to 2019.

**Supplementary Figure 1.** Trends from 1990 to 2019 in number and age-standardised prevalence rate of IBD at the global level.

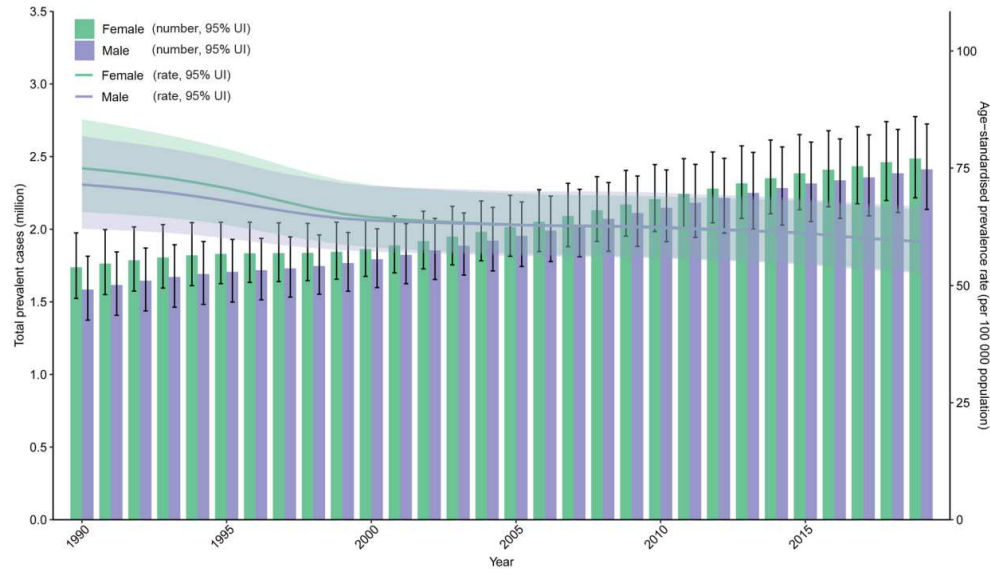

Error bars indicate the 95% uncertainty interval (UI) for number of prevalent cases. Shading indicates the 95% UI for the age-standardised prevalence rate. IBD, inflammatory bowel disease.

**Supplementary Figure 2.** The absolute number of deaths due to IBD for 204 countries and territories in 2019.

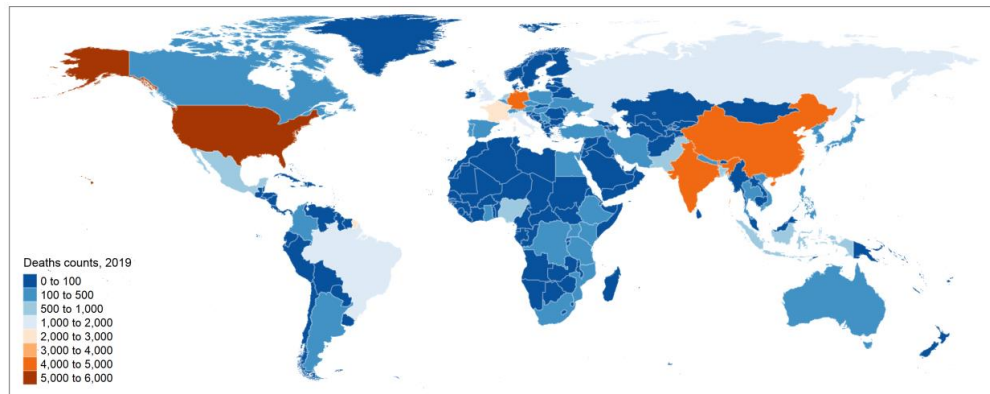

IBD, inflammatory bowel disease.

**Supplementary Figure 3.** The age-standardised death rate (per 100 000 population) of IBD for 204 countries and territories in 2019.

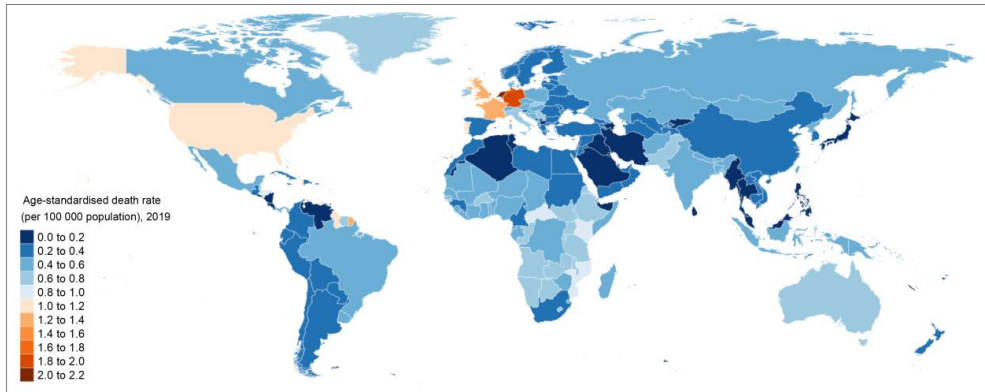

IBD, inflammatory bowel disease.

**Supplementary Figure 4.** The EAPC of age-standardised death rate for IBD in 204 countries and territories between 1990 and 2019.

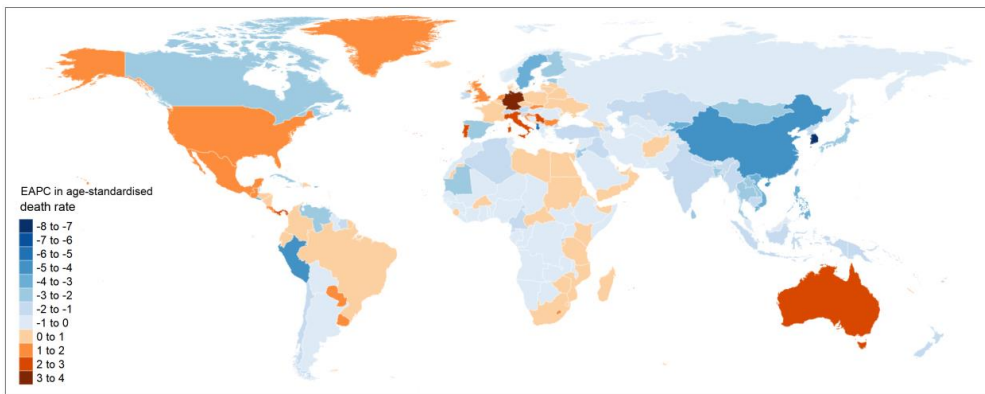

EAPC, estimated annual percentage change; IBD, inflammatory bowel disease.

**Supplementary Figure 5.** Trends from 1990 to 2019 in number and age-standardised death rate of IBD at the global level.

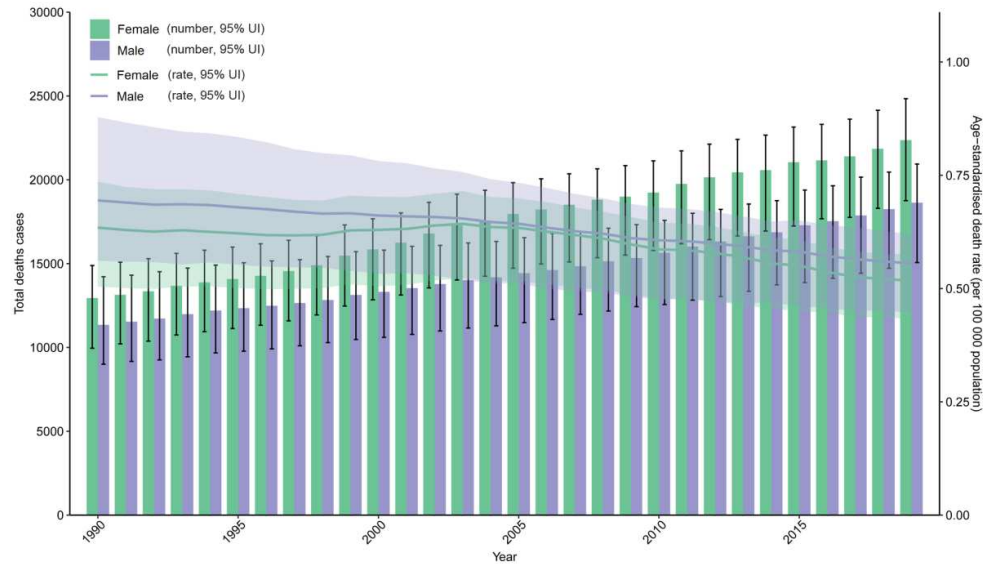

Error bars indicate the 95% uncertainty interval (UI) for number of death cases. Shading indicates the 95% UI for the age-standardised death rate. IBD, inflammatory bowel disease.

**Supplementary Figure 6.** The absolute number of DALYs due to IBD for 204 countries and territories in 2019.

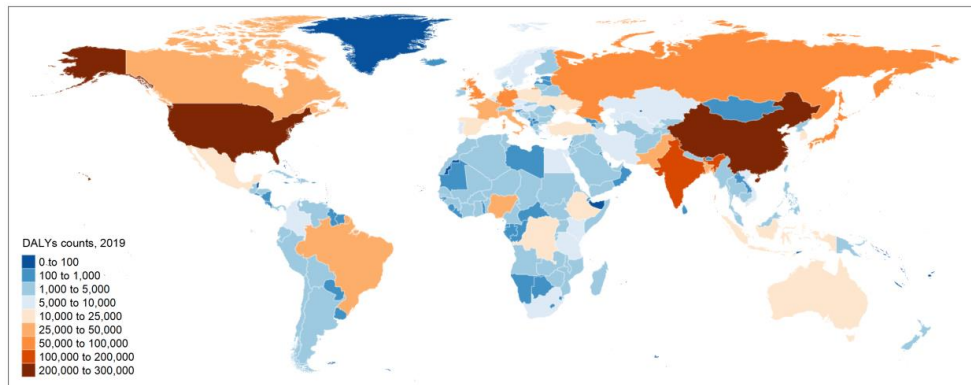

DALYs, disability adjusted life years; IBD, inflammatory bowel disease.

**Supplementary Figure 7.** The absolute number of incident cases due to IBD for 204 countries and territories in 2019.

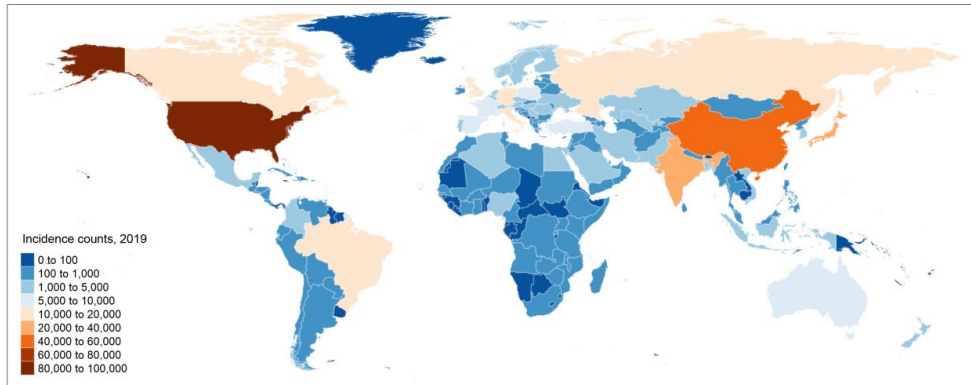

IBD, inflammatory bowel disease.

**Supplementary Figure 8.** The absolute number of YLLs due to IBD for 204 countries and territories in 2019.

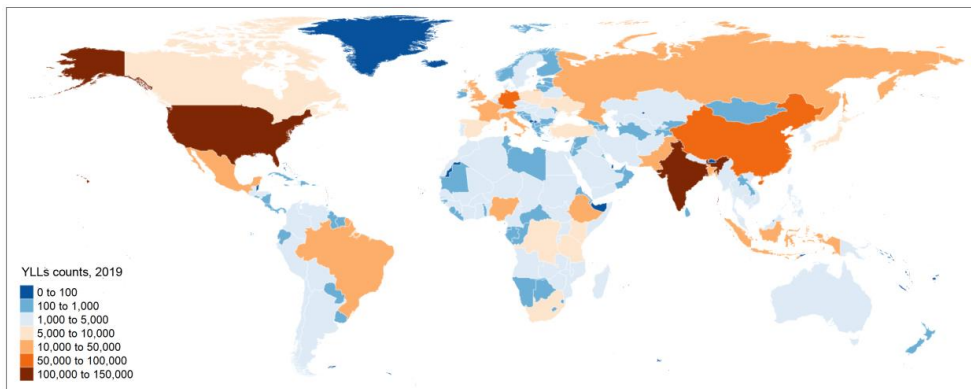

IBD, inflammatory bowel disease; YLLs, years of life lost.

**Supplementary Figure 9.** The absolute number of YLDs due to IBD for 204 countries and territories in 2019.

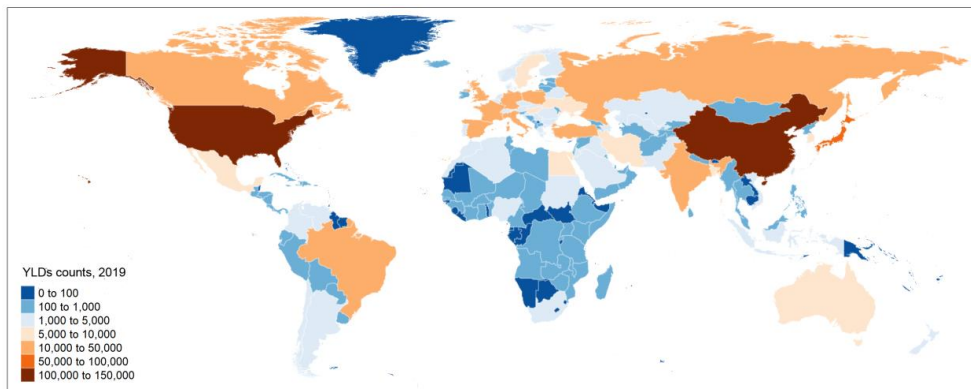

IBD, inflammatory bowel disease; YLDs, years of life lived with disability.

**Supplementary Figure 10.** The age-standardised DALY rate (per 100 000 population) of IBD for 204 countries and territories in 2019.

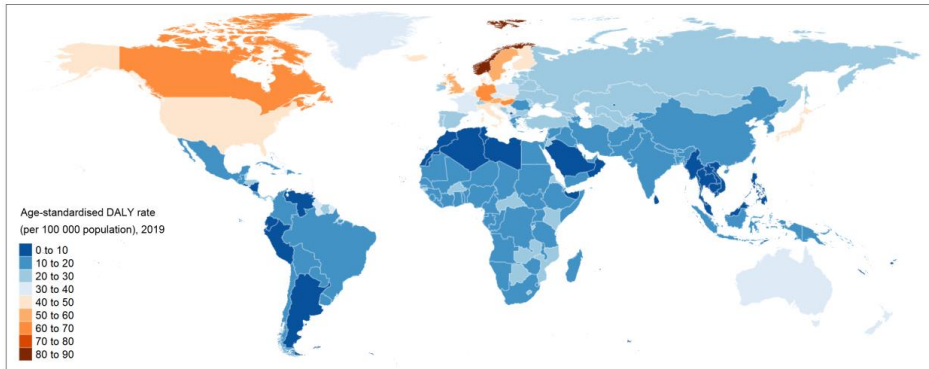

DALY, disability adjusted life year; IBD, inflammatory bowel disease.

**Supplementary Figure 11.** The EAPC of age-standardised DALY rate for IBD in 204 countries and territories between 1990 and 2019.

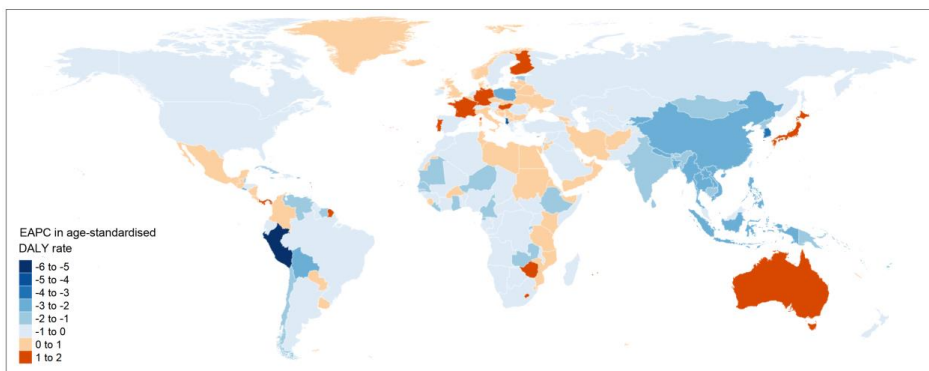

DALY, disability adjusted life year; EAPC, estimated annual percentage change; IBD, inflammatory bowel disease.

**Supplementary Figure 12.** The EAPC of age-standardised incidence rate for IBD in 204 countries and territories between 1990 and 2019.

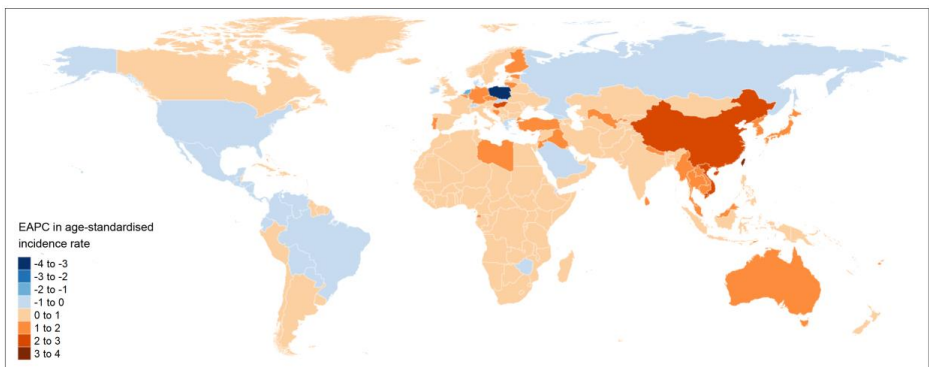

EAPC, estimated annual percentage change; IBD, inflammatory bowel disease.

**Supplementary Figure 13.** The EAPC of age-standardised YLL rate for IBD in 204 countries and territories between 1990 and 2019.

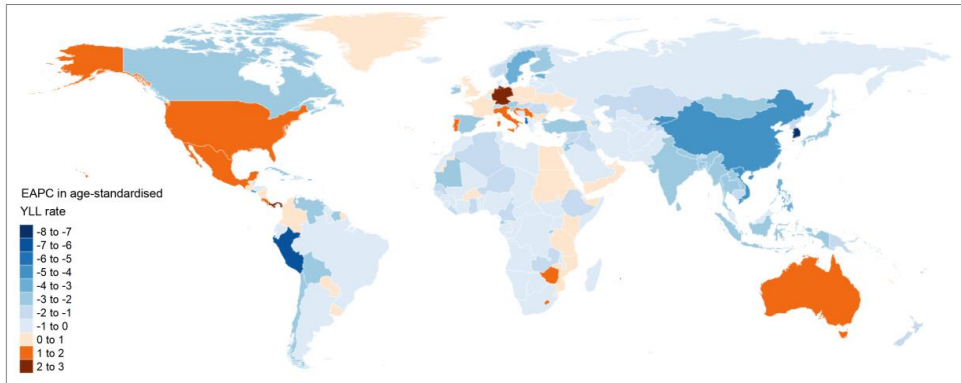

EAPC, estimated annual percentage change; IBD, inflammatory bowel disease; YLL, years of life lost.

**Supplementary Figure 14.** The EAPC of age-standardised YLD rate for IBD in 204 countries and territories between 1990 and 2019.

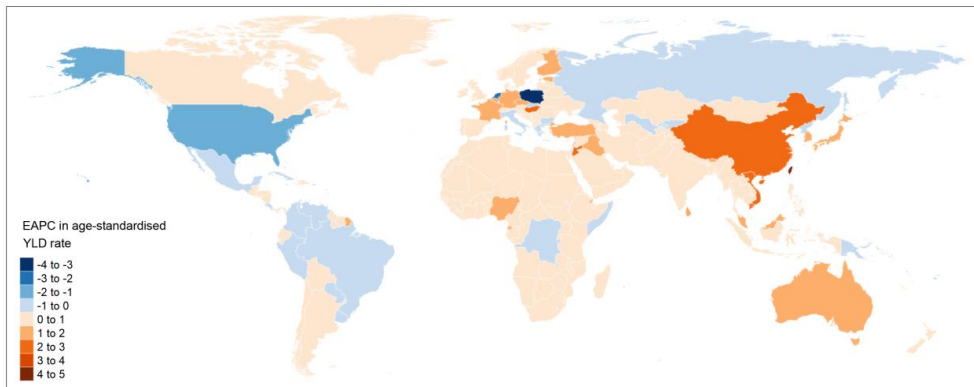

EAPC, estimated annual percentage change; IBD, inflammatory bowel disease; YLD, years of life lived with disability.



**Supplementary Figure 15.** Global counts and age-specific rates of YLLs and YLDs due to IBD across age group in 2019.

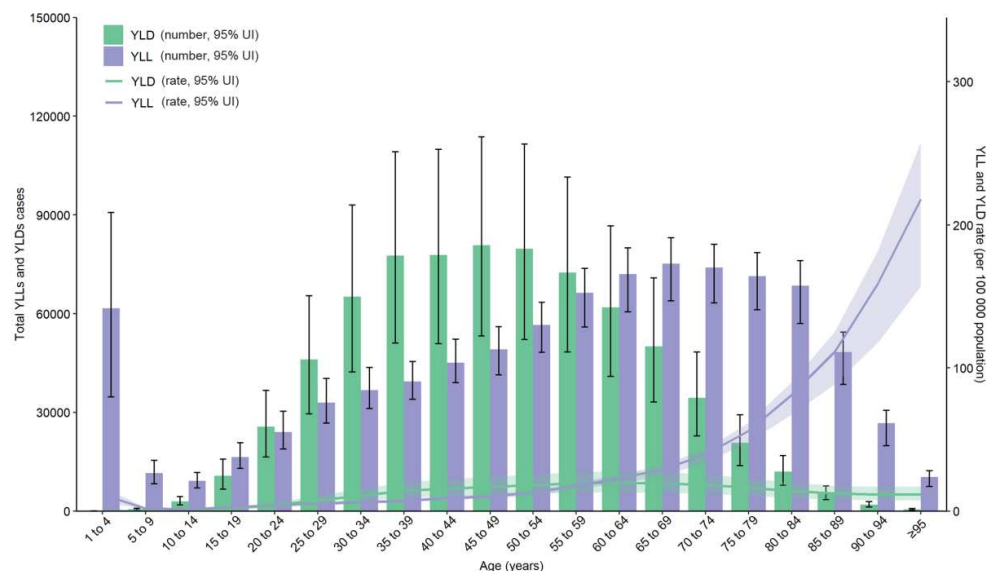

Error bars indicate the 95% uncertainty interval (UI) for YLLs and YLDs. Shading indicates the 95% UI for the rates. IBD, inflammatory bowel disease; YLDs, years of life lived with disability; YLLs, years of life lost.

**Supplementary Figure 16.** Trends from 1990 to 2019 in number and age-standardised DALY rate of IBD at the global level.

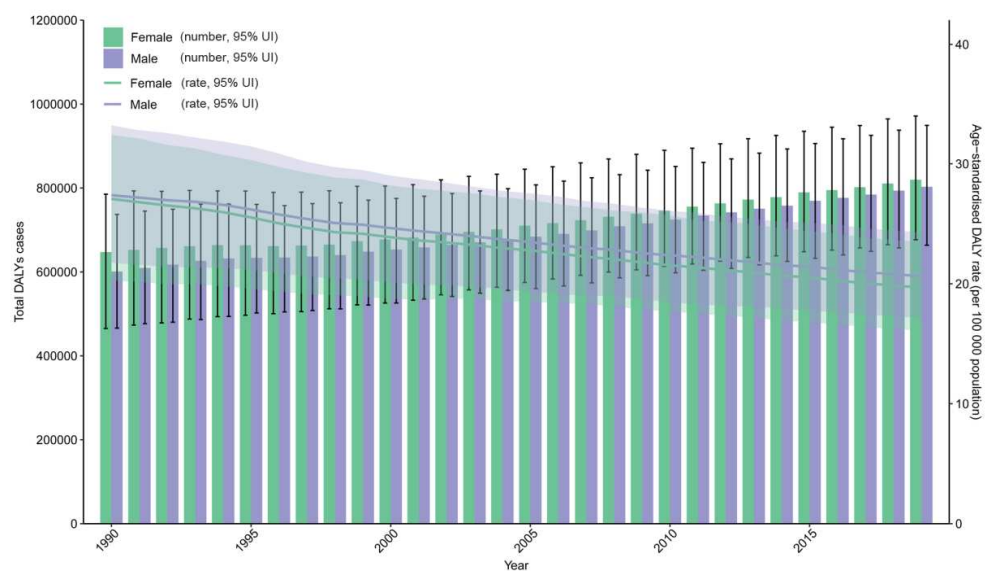

Error bars indicate the 95% uncertainty interval (UI) for number of DALYs cases. Shading indicates the 95% UI for the age-standardised DALY rate. DALY, disability adjusted life year; IBD, inflammatory bowel disease.

**Supplementary Table 1** Prevalent cases, deaths and disability adjusted life years (DALYs) of inflammatory bowel disease (IBD) in 1990 and 2019 and their percentage change from 1990 to 2019

| Characteristics         | Prevalent cases                       |                                    |                                     | Deaths                       |                              |                                     | DALYs                             |                                    |                                     |
|-------------------------|---------------------------------------|------------------------------------|-------------------------------------|------------------------------|------------------------------|-------------------------------------|-----------------------------------|------------------------------------|-------------------------------------|
|                         | 1990 No.<br>(95%UI)                   | 2019 No.<br>(95%UI)                | Percentage<br>change (%)<br>(95%UI) | 1990 No.<br>(95%UI)          | 2019 No.<br>(95%UI)          | Percentage<br>change (%)<br>(95%UI) | 1990 No.<br>(95%UI)               | 2019 No.<br>(95%UI)                | Percentage<br>change (%)<br>(95%UI) |
| Global                  | 3322132<br>(2903627<br>to<br>3790430) | 4898558<br>(4353233 to<br>5499296) | 47.45 (43.76<br>to 51.43)           | 24295<br>(20258 to<br>28376) | 40998<br>(34933 to<br>44661) | 68.75 (47.12<br>to 94.62)           | 1248275<br>(963014 to<br>1503174) | 1622498<br>(1356296 to<br>1915042) | 29.98 (14.83<br>to 50.21)           |
| Sex                     |                                       |                                    |                                     |                              |                              |                                     |                                   |                                    |                                     |
| Male                    | 1584462<br>(1374414<br>to<br>1814399) | 2411840<br>(2136219 to<br>2724369) | 52.22 (48.47<br>to 56.34)           | 11347 (9002<br>to 14218)     | 18633<br>(15060 to<br>20938) | 64.21 (37.52<br>to 90.74)           | 600963<br>(466033 to<br>736983)   | 802748<br>(663563 to<br>949342)    | 33.58 (15.75<br>to 53.92)           |
| Female                  | 1737670<br>(1523309<br>to<br>1974864) | 2486718<br>(2216240 to<br>2775262) | 43.11 (39.03<br>to 47.31)           | 12947<br>(9953 to<br>14888)  | 22365<br>(18759 to<br>24838) | 72.74 (47.65<br>to 115.99)          | 647311<br>(465166 to<br>785221)   | 819751<br>(676700 to<br>971584)    | 26.64 (10.70<br>to 54.99)           |
| SDI quintile            |                                       |                                    |                                     |                              |                              |                                     |                                   |                                    |                                     |
| High                    | 1883348<br>(1654416<br>to<br>2128434) | 2283717<br>(2079286 to<br>2493360) | 21.26 (15.68<br>to 27.38)           | 7386 (6656<br>to 8731)       | 17801<br>(14215 to<br>19552) | 141.02<br>(73.28 to<br>161.46)      | 415485<br>(323781 to<br>520634)   | 603330<br>(489511 to<br>729627)    | 45.21 (26.78<br>to 56.21)           |
| High-middle             | 942961<br>(817123 to<br>1086707)      | 1362491<br>(1206918 to<br>1538822) | 44.49 (40.70<br>to 48.74)           | 5045 (4476<br>to 5782)       | 7272 (6519<br>to 8110)       | 44.13 (24.31<br>to 65.11)           | 288336<br>(236216 to<br>344578)   | 352794<br>(285252 to<br>432623)    | 22.36 (12.11<br>to 32.44)           |
| Middle                  | 301457<br>(252149 to<br>355140)       | 818871<br>(688348 to<br>968484)    | 171.64<br>(163.13 to<br>181.21)     | 5425 (4146<br>to 6768)       | 6598 (5602<br>to 7341)       | 21.61 (-2.11<br>to 58.92)           | 248139<br>(184995 to<br>297495)   | 291088<br>(240412 to<br>345833)    | 17.31 (-3.67<br>to 60.14)           |
| Low-middle              | 152118<br>(124851 to<br>184061)       | 335789<br>(278324 to<br>403122)    | 120.74<br>(115.27 to<br>126.61)     | 4533 (3018<br>to 6152)       | 6180 (4994<br>to 7392)       | 36.34 (9.54<br>to 81.14)            | 203020<br>(126472 to<br>268417)   | 236584<br>(189248 to<br>283804)    | 16.53 (-9.40<br>to 65.68)           |
| Low                     | 41264<br>(33866 to<br>50406)          | 95941<br>(78454 to<br>116802)      | 132.51<br>(127.59 to<br>136.94)     | 1893 (1144<br>to 2626)       | 3125 (2442<br>to 4016)       | 65.06 (21.70<br>to 141.90)          | 92718<br>(45634 to<br>147570)     | 137867<br>(100264 to<br>180825)    | 48.69 (1.39<br>to 148.81)           |
| GBD region              |                                       |                                    |                                     |                              |                              |                                     |                                   |                                    |                                     |
| Andean Latin<br>America | 4294 (3643<br>to 5026)                | 10380<br>(8875 to<br>12027)        | 141.73<br>(131.47 to<br>153.82)     | 168 (99 to<br>249)           | 144 (111 to<br>182)          | -14.37<br>(-45.71 to<br>56.11)      | 10768<br>(5527 to<br>17349)       | 5942 (4666<br>to 7395)             | -44.82<br>(-67.80 to<br>12.24)      |
| Australasia             | 24135<br>(20445 to<br>28083)          | 53225<br>(47167 to<br>59881)       | 120.53<br>(104.13 to<br>137.71)     | 117 (103 to<br>139)          | 400 (291 to<br>465)          | 241.68<br>(120.09 to<br>298.29)     | 5802 (4531<br>to 7299)            | 13328<br>(10488 to<br>16560)       | 129.69<br>(92.95 to<br>151.94)      |

|                              |                             |                            |                           |                     |                     |                           |                           |                           |  |                          |
|------------------------------|-----------------------------|----------------------------|---------------------------|---------------------|---------------------|---------------------------|---------------------------|---------------------------|--|--------------------------|
|                              |                             | 13360                      |                           |                     |                     |                           |                           |                           |  | 19.44                    |
| Caribbean                    | 8194 (7012 to 9634)         | (11262 to 15892)           | 63.04 (55.79 to 71.54)    | 157 (118 to 208)    | 210 (156 to 264)    | 33.66 (3.39 to 70.80)     | 7451 (5008 to 11792)      | 8900 (6523 to 11709)      |  | (-16.93 to 53.06)        |
| Central Asia                 | 42100 (35493 to 49944)      | 72034 (60489 to 86073)     | 71.10 (65.37 to 77.74)    | 215 (167 to 251)    | 249 (218 to 288)    | 15.70 (-1.33 to 47.63)    | 15952 (12800 to 19230)    | 20237 (16357 to 24806)    |  | 26.86 (10.10 to 46.33)   |
| Central Europe               | 290304 (249715 to 338920)   | 236196 (214732 to 259804)  | -18.64 (-24.57 to -11.98) | 604 (563 to 696)    | 958 (799 to 1104)   | 58.66 (24.18 to 83.87)    | 61546 (47417 to 77414)    | 54694 (42729 to 67570)    |  | -11.13 (-18.70 to -3.30) |
| Central Latin America        | 40471 (34451 to 47294)      | 81606 (69904 to 95542)     | 101.64 (96.51 to 107.43)  | 301 (270 to 330)    | 854 (702 to 997)    | 183.85 (135.53 to 232.71) | 18096 (15456 to 20849)    | 36178 (30219 to 43014)    |  | 99.92 (74.40 to 127.28)  |
| Central Sub-Saharan Africa   | 2781 (2267 to 3400)         | 7015 (5690 to 8639)        | 152.29 (138.04 to 168.85) | 193 (118 to 301)    | 355 (254 to 497)    | 84.05 (16.03 to 200.18)   | 9491 (4855 to 17734)      | 15574 (10733 to 22385)    |  | 64.1 (-9.96 to 213.74)   |
| East Asia                    | 244790 (202981 to 291054)   | 925074 (788347 to 1085238) | 277.90 (260.33 to 300.79) | 5734 (4169 to 7374) | 4983 (4074 to 5769) | -13.11 (-36.64 to 22.31)  | 240231 (167510 to 299891) | 239963 (187123 to 299808) |  | -0.11 (-25.58 to 54.11)  |
| Eastern Europe               | 233969 (199922 to 274757)   | 237672 (203164 to 276577)  | 1.58 (-0.80 to 4.10)      | 1305 (992 to 1507)  | 1633 (1370 to 1865) | 25.06 (5.75 to 56.78)     | 72932 (57526 to 88869)    | 77123 (63287 to 94008)    |  | 5.75 (-4.27 to 21.34)    |
| Eastern Sub-Saharan Africa   | 7067 (5804 to 8596)         | 18830 (15395 to 22997)     | 166.43 (160.39 to 173.14) | 697 (462 to 1111)   | 1253 (923 to 1678)  | 79.64 (7.37 to 192.58)    | 35480 (16916 to 68481)    | 52928 (39435 to 74044)    |  | 49.18 (-19.5 to 202.23)  |
| High-income Asia Pacific     | 255028 (213480 to 302123)   | 459062 (403027 to 520418)  | 80.00 (65.57 to 95.92)    | 685 (439 to 789)    | 694 (556 to 912)    | 1.33 (-19.66 to 85.83)    | 51699 (38591 to 66563)    | 78601 (55261 to 105049)   |  | 52.04 (37.02 to 68.81)   |
| High-income North America    | 1100006 (961428 to 1248970) | 920750 (859032 to 982587)  | -16.30 (-22.94 to -9.05)  | 2442 (2189 to 2964) | 6314 (5076 to 6886) | 158.55 (83.64 to 182.08)  | 209072 (155328 to 270983) | 245234 (200564 to 294018) |  | 17.30 (2.00 to 33.02)    |
| North Africa and Middle East | 89159 (76544 to 102596)     | 282534 (239506 to 334478)  | 216.89 (196.52 to 234.98) | 592 (407 to 836)    | 1033 (866 to 1226)  | 74.43 (20.30 to 164.45)   | 35438 (25569 to 46318)    | 72755 (56928 to 91112)    |  | 105.30 (56.49 to 171.10) |
| Oceania                      | 199 (159 to 240)            | 417 (338 to 509)           | 109.69 (96.12 to 124.69)  | 22 (14 to 31)       | 36 (26 to 51)       | 65.38 (12.06 to 142.01)   | 1036 (602 to 1625)        | 1696 (1107 to 2576)       |  | 63.81 (3.61 to 170.09)   |
| South Asia                   | 157942 (127077 to 195839)   | 335746 (272330 to 413946)  | 112.58 (106.64 to 120.13) | 3864 (2533 to 5504) | 5702 (4286 to 7410) | 47.58 (16.55 to 93.31)    | 171448 (105178 to 227334) | 221978 (166881 to 278494) |  | 29.47 (1.12 to 76.01)    |
| Southeast Asia               | 16557 (13040 to 20323)      | 48152 (39527 to 58063)     | 190.83 (174.97 to 212.05) | 1230 (741 to 1536)  | 1498 (1139 to 1771) | 21.79 (-3.10 to 72.54)    | 45316 (30762 to 56838)    | 46686 (38847 to 55186)    |  | 3.02 (-20.10 to 46.45)   |
| Southern Latin America       | 9153 (7618 to 10754)        | 15243 (12896 to 17590)     | 66.53 (58.55 to 74.68)    | 139 (123 to 151)    | 236 (210 to 280)    | 69.36 (46.49 to 101.01)   | 5248 (4578 to 5993)       | 7740 (6670 to 9152)       |  | 47.49 (32.63 to 65.73)   |

|                |            |            |              |             |              |              |            |            |              |  |
|----------------|------------|------------|--------------|-------------|--------------|--------------|------------|------------|--------------|--|
|                |            | 18023)     |              |             |              |              |            |            |              |  |
| Southern       |            |            | 116.54       |             |              |              |            |            |              |  |
| Sub-Saharan    | 3760 (3109 | 8141 (6736 | (109.70 to   | 138 (99 to  | 240 (198 to  | 74.44 (31.74 | 6615 (4279 | 9230 (7542 | 39.54 (-0.67 |  |
| Africa         | to 4581)   | to 9864)   | 124.72)      | 169)        | 278)         | to 161.11)   | to 9518)   | to 10926)  | to 121.74)   |  |
|                | 74856      | 117653     |              |             |              | 129.84       | 27724      | 46997      |              |  |
| Tropical Latin | (65373 to  | (102012 to | 57.17 (51.82 | 455 (400 to | 1047 (950    | (109.36 to   | (23589 to  | (40115 to  | 69.52 (59.16 |  |
| America        | 85425)     | 134397)    | to 63.44)    | 492)        | to 1217)     | 167.46)      | 32357)     | 54972)     | to 83.74)    |  |
|                | 707145     | 1026504    |              |             |              | 160.46       | 185733     | 310691     |              |  |
| Western Europe | (634121 to | (925440 to | 45.16 (41.37 | 4600 (4132  | 11981 (9244  | (66.17 to    | (149509 to | (255911 to | 67.28 (34.40 |  |
|                | 786986)    | 1127578)   | to 48.78)    | to 5864)    | to 13315)    | 190.17)      | 227830)    | 371106)    | to 79.72)    |  |
| Western        | 10222      | 28965      | 183.36       |             |              |              | 31197      | 56026      |              |  |
| Sub-Saharan    | (8432 to   | (23820 to  | (178.45 to   | 634 (365 to | 1178 (805 to | 85.67 (40.49 | (14381 to  | (35327 to  | 79.59 (30.21 |  |
| Africa         | 12421)     | 35133)     | 188.56)      | 996)        | 1610)        | to 177.24)   | 47867)     | 78051)     | to 198.66)   |  |

Abbreviations: GBD=Global Burden of Disease. SDI=Socio-demographic Index.  
 UI=uncertainty interval.

**Supplementary Table 2** Prevalent cases, deaths and disability adjusted life years (DALYs) for inflammatory bowel disease (IBD) by 204 countries or territories in 2019 and 2019, and their percentage change from 1990 to 2019

| Characteristics     | Prevalent cases        |                        |                                     | Deaths              |                     |                                     | DALYs               |                       |                                     |
|---------------------|------------------------|------------------------|-------------------------------------|---------------------|---------------------|-------------------------------------|---------------------|-----------------------|-------------------------------------|
|                     | 1990 No.<br>(95%UI)    | 2019 No.<br>(95%UI)    | Percentage<br>change (%)<br>(95%UI) | 1990 No.<br>(95%UI) | 2019 No.<br>(95%UI) | Percentage<br>change (%)<br>(95%UI) | 1990 No.<br>(95%UI) | 2019 No.<br>(95%UI)   | Percentage<br>change (%)<br>(95%UI) |
| Afghanistan         | 1738 (1410 to 2120)    | 5699 (4548 to 7113)    | 228.01 (200.09 to 258.61)           | 31 (14 to 55)       | 58 (31 to 89)       | 88.34 (29.82 to 190.04)             | 1237 (627 to 2377)  | 3017 (1879 to 4660)   | 143.91 (72.00 to 244.29)            |
| Albania             | 3324 (2792 to 3928)    | 3896 (3286 to 4630)    | 17.22 (7.74 to 27.7)                | 50 (21 to 65)       | 13 (9 to 19)        | -74.70 (-84.65 to -32.21)           | 3904 (1399 to 5200) | 991 (727 to 1300)     | -74.62 (-83.28 to -33.39)           |
| Algeria             | 5982 (5169 to 6928)    | 16875 (13593 to 20871) | 182.11 (149.55 to 221.44)           | 28 (18 to 44)       | 53 (38 to 70)       | 90.14 (11.64 to 209.90)             | 1826 (1320 to 2675) | 4021 (2997 to 5295)   | 120.18 (51.51 to 190.24)            |
| American Samoa      | 2 (2 to 3)             | 3 (3 to 4)             | 48.88 (37.37 to 61.93)              | 0 (0 to 1)          | 0 (0 to 0)          | -37.72 (-65.35 to 47.30)            | 15 (9 to 21)        | 8 (5 to 14)           | -47.39 (-70.61 to 25.25)            |
| Andorra             | 69 (58 to 81)          | 133 (111 to 159)       | 93.79 (79.63 to 110.16)             | 0 (0 to 0)          | 1 (1 to 2)          | 266.11 (124.63 to 467.38)           | 17 (13 to 23)       | 36 (26 to 47)         | 111.42 (66.64 to 167.41)            |
| Angola              | 460 (373 to 573)       | 1648 (1338 to 2017)    | 258.10 (233.16 to 285.26)           | 37 (17 to 76)       | 78 (52 to 117)      | 112.25 (2.89 to 349.24)             | 1913 (713 to 4719)  | 3662 (2249 to 5786)   | 91.46 (-19.81 to 397.70)            |
| Antigua and Barbuda | 17 (14 to 20)          | 34 (28 to 41)          | 102.06 (85.45 to 119.33)            | 1 (0 to 1)          | 1 (0 to 1)          | 17.47 (-15.05 to 92.04)             | 18 (13 to 20)       | 22 (18 to 28)         | 25.07 (-4.44 to 87.07)              |
| Argentina           | 4828 (3926 to 5756)    | 7825 (6413 to 9484)    | 62.10 (49.74 to 73.10)              | 84 (74 to 93)       | 143 (124 to 169)    | 71.49 (45.04 to 102.47)             | 2981 (2577 to 3433) | 4556 (3904 to 5373)   | 52.84 (34.77 to 71.30)              |
| Armenia             | 2547 (2109 to 3013)    | 3263 (2744 to 3956)    | 28.11 (18.76 to 37.72)              | 7 (5 to 9)          | 11 (8 to 13)        | 51.30 (17.69 to 101.11)             | 637 (492 to 805)    | 764 (593 to 979)      | 19.86 (4.07 to 38.21)               |
| Australia           | 18262 (15282 to 21523) | 44624 (39169 to 50438) | 144.35 (122.23 to 167.82)           | 97 (85 to 120)      | 369 (259 to 430)    | 279.18 (123.37 to 350.95)           | 4536 (3533 to 5743) | 11569 (9111 to 14334) | 155.05 (104.34 to 184.94)           |
| Austria             | 25345 (22242 to 28177) | 33080 (29600 to 37293) | 30.52 (19.87 to 42.12)              | 99 (88 to 133)      | 101 (80 to 165)     | 2.52 (-14.48 to 30.58)              | 5699 (4484 to 7140) | 6463 (4736 to 8366)   | 13.41 (1.99 to 27.18)               |
| Azerbaijan          | 4623 (3817 to 5491)    | 9463 (7886 to 11458)   | 104.71 (89.06 to 120.81)            | 12 (9 to 15)        | 13 (10 to 18)       | 12.27 (-26.26 to 63.36)             | 1080 (815 to 1410)  | 1829 (1289 to 2470)   | 69.47 (44.70 to 98.86)              |
| Bahamas             | 65 (55 to 77)          | 123 (102 to 152)       | 88.60 (70.75 to 107.18)             | 1 (1 to 1)          | 2 (1 to 2)          | 82.56 (39.32 to 142.99)             | 49 (41 to 57)       | 78 (63 to 98)         | 60.27 (27.44 to 102.98)             |
| Bahrain             | 179 (152 to 212)       | 846 (688 to 1004)      | 373.26 (311.12 to 435.40)           | 0 (0 to 1)          | 1 (1 to 2)          | 178.61 (101.12 to 256.10)           | 44 (32 to 56)       | 167 (116 to 218)      | 283.01 (183.34 to 382.68)           |

|                                        |                              |                                 |                                 |                     |                       |                                 |                              |                              |                                 |
|----------------------------------------|------------------------------|---------------------------------|---------------------------------|---------------------|-----------------------|---------------------------------|------------------------------|------------------------------|---------------------------------|
|                                        | 206)                         | 1035)                           | (309.51 to<br>442.36)           |                     |                       | (82.33 to<br>326.1)             | 57)                          | 229)                         | (204.71 to<br>374.48)           |
| Bangladesh                             | 11786 (9494<br>to 14655)     | 33018<br>(26285 to<br>41258)    | 180.14<br>(157.01 to<br>203.31) | 544 (333 to<br>805) | 713 (431 to<br>1068)  | 30.90<br>(-18.82 to<br>117.77)  | 23781<br>(13440 to<br>35324) | 26354<br>(17363 to<br>37248) | 10.82<br>(-35.76 to<br>104.55)  |
| Barbados                               | 183 (153 to<br>218)          | 282 (238 to<br>340)             | 54.27 (41.76<br>to 69.09)       | 1 (1 to 1)          | 2 (1 to 2)            | 48.15 (12.33<br>to 96.63)       | 58 (47 to<br>71)             | 81 (62 to<br>101)            | 39.17 (18.58<br>to 61.35)       |
| Belarus                                | 9910 (8453<br>to 11723)      | 11335 (9509<br>to 13529)        | 14.38 (6.51<br>to 23.58)        | 45 (32 to<br>60)    | 58 (42 to<br>77)      | 29.88 (-8.49<br>to 97.40)       | 2690 (2011<br>to 3484)       | 3063 (2364<br>to 3923)       | 13.87 (-6.13<br>to 41.64)       |
| Belgium                                | 9661 (8871<br>to 10430)      | 20093<br>(17518 to<br>22821)    | 107.97<br>(87.58 to<br>131.05)  | 113 (99 to<br>134)  | 273 (206 to<br>319)   | 141.39<br>(64.63 to<br>188.06)  | 3307 (2755<br>to 3921)       | 6370 (5236<br>to 7678)       | 92.63 (55.31<br>to 116.01)      |
| Belize                                 | 26 (22 to<br>32)             | 87 (71 to<br>106)               | 230.96<br>(204.21 to<br>258.71) | 1 (1 to 1)          | 2 (1 to 2)            | 117.53<br>(55.55 to<br>286.06)  | 40 (29 to<br>50)             | 77 (64 to<br>97)             | 91.51 (43.10<br>to 212.80)      |
| Benin                                  | 209 (171 to<br>253)          | 685 (549 to<br>838)             | 227.98<br>(203.9 to<br>255.4)   | 14 (6 to 24)        | 30 (18 to<br>44)      | 116.13<br>(28.68 to<br>334.23)  | 694 (232 to<br>1320)         | 1437 (773 to<br>2281)        | 107.25<br>(11.24 to<br>374.73)  |
| Bermuda                                | 23 (19 to<br>28)             | 33 (27 to<br>39)                | 42.79 (30.81<br>to 55.62)       | 1 (0 to 1)          | 0 (0 to 1)            | -15.72<br>(-38.69 to<br>37.20)  | 18 (14 to<br>21)             | 14 (11 to<br>18)             | -22.33<br>(-40.21 to<br>11.58)  |
| Bhutan                                 | 66 (52 to<br>83)             | 158 (128 to<br>197)             | 140.27<br>(120.87 to<br>162.46) | 2 (1 to 4)          | 3 (2 to 7)            | 57.00 (-6.75<br>to 195.84)      | 86 (38 to<br>160)            | 102 (67 to<br>202)           | 18.91<br>(-35.13 to<br>133.49)  |
| Bolivia<br>(Plurinational<br>State of) | 569 (473 to<br>694)          | 1400 (1171<br>to 1693)          | 145.90<br>(129.42 to<br>165.45) | 25 (10 to<br>48)    | 34 (26 to<br>45)      | 39.57<br>(-28.99 to<br>217.03)  | 1552 (546 to<br>3375)        | 1348 (986 to<br>1772)        | -13.09<br>(-59.56 to<br>134.61) |
| Bosnia and<br>Herzegovina              | 4910 (4225<br>to 5717)       | 5387 (4726<br>to 6247)          | 9.73 (1.15 to<br>17.87)         | 18 (12 to<br>23)    | 26 (13 to<br>35)      | 40.25<br>(-11.49 to<br>108.03)  | 1285 (987 to<br>1644)        | 1372 (949 to<br>1778)        | 6.80 (-13.90<br>to 28.67)       |
| Botswana                               | 70 (58 to<br>86)             | 221 (179 to<br>276)             | 214.79<br>(189.25 to<br>244.24) | 4 (3 to 6)          | 9 (6 to 13)           | 104.82<br>(14.62 to<br>221.73)  | 188 (121 to<br>269)          | 388 (241 to<br>620)          | 106.67<br>(18.10 to<br>226.68)  |
| Brazil                                 | 73860<br>(64511 to<br>84264) | 115697<br>(100339 to<br>132222) | 56.64 (51.18<br>to 62.94)       | 451 (396 to<br>488) | 1035 (939 to<br>1207) | 129.44<br>(108.60 to<br>167.01) | 27396<br>(23325 to<br>31992) | 46350<br>(39647 to<br>54190) | 69.18 (58.65<br>to 83.50)       |
| Brunei<br>Darussalam                   | 126 (100 to<br>155)          | 295 (237 to<br>361)             | 134.79<br>(114.54 to<br>156.55) | 1 (1 to 2)          | 3 (2 to 3)            | 127.20<br>(58.12 to<br>237.13)  | 57 (40 to<br>85)             | 114 (89 to<br>147)           | 99.44 (53.62<br>to 164.86)      |
| Bulgaria                               | 13507<br>(11443 to<br>15898) | 11275 (9602<br>to 13477)        | -16.53<br>(-23.08 to<br>-9.27)  | 25 (22 to<br>32)    | 41 (32 to<br>51)      | 65.55 (22.25<br>to 118.70)      | 2779 (2081<br>to 3597)       | 2569 (1937<br>to 3319)       | -7.55<br>(-19.78 to<br>6.98)    |
| Burkina Faso                           | 392 (318 to<br>485)          | 1098 (901 to<br>1347)           | 180.10<br>(158.26 to<br>201.94) | 35 (16 to<br>58)    | 81 (41 to<br>129)     | 130.36<br>(25.65 to<br>235.07)  | 1781 (607 to<br>3594)        | 3942 (1729<br>to 7006)       | 121.28<br>(15.32 to<br>227.24)  |

|                          |                           |                            |                           |                     |                     |                           |                           |                           |                          |
|--------------------------|---------------------------|----------------------------|---------------------------|---------------------|---------------------|---------------------------|---------------------------|---------------------------|--------------------------|
|                          |                           |                            | 200.27)                   |                     |                     |                           | 350.02)                   |                           | 380.59)                  |
| Burundi                  | 207 (169 to 255)          | 459 (369 to 561)           | 121.41 (105.47 to 137.36) | 21 (13 to 37)       | 38 (24 to 58)       | 76.44 (-8.52 to 253.21)   | 1064 (461 to 2387)        | 1608 (1001 to 2527)       | 51.13 (-33.49 to 272.32) |
| Cabo Verde               | 23 (19 to 28)             | 63 (51 to 78)              | 176.77 (156.29 to 198.45) | 1 (0 to 1)          | 1 (1 to 1)          | 37.26 (-16.62 to 131.63)  | 34 (21 to 47)             | 43 (35 to 54)             | 28.23 (-15.29 to 118.40) |
| Cambodia                 | 218 (168 to 273)          | 595 (467 to 730)           | 172.54 (148.48 to 197.52) | 26 (14 to 39)       | 38 (26 to 48)       | 46.42 (-4.73 to 167.94)   | 1175 (547 to 2166)        | 1222 (890 to 1546)        | 3.97 (-44.25 to 128.29)  |
| Cameroon                 | 538 (438 to 666)          | 1938 (1576 to 2393)        | 259.93 (232.74 to 288.04) | 30 (14 to 46)       | 58 (30 to 95)       | 95.05 (-1.81 to 218.33)   | 1367 (583 to 2134)        | 2830 (1520 to 4639)       | 107.06 (11.41 to 245.01) |
| Canada                   | 116922 (112352 to 121655) | 157737 (142113 to 173888)  | 34.91 (23.15 to 47.18)    | 270 (241 to 302)    | 403 (323 to 605)    | 49.15 (24.68 to 106.93)   | 22694 (17260 to 29101)    | 29915 (21904 to 38441)    | 31.82 (19.21 to 46.22)   |
| Central African Republic | 116 (95 to 145)           | 243 (199 to 299)           | 109.71 (91.54 to 126.84)  | 12 (7 to 19)        | 21 (12 to 35)       | 80.23 (18.71 to 166.11)   | 510 (273 to 935)          | 890 (475 to 1568)         | 74.48 (9.24 to 167.75)   |
| Chad                     | 251 (205 to 306)          | 713 (580 to 881)           | 184.44 (162.13 to 208.28) | 21 (10 to 35)       | 44 (25 to 64)       | 108.90 (42.17 to 222.10)  | 960 (360 to 1689)         | 2084 (1020 to 3460)       | 117.09 (31.20 to 260.72) |
| Chile                    | 3739 (3165 to 4369)       | 6732 (5813 to 7788)        | 80.06 (68.43 to 93.27)    | 46 (36 to 51)       | 70 (59 to 89)       | 53.60 (25.60 to 123.36)   | 1928 (1573 to 2244)       | 2612 (2169 to 3169)       | 35.45 (14.76 to 72.90)   |
| China                    | 239473 (198363 to 285024) | 911045 (776347 to 1069533) | 280.44 (262.77 to 303.34) | 5560 (4048 to 7203) | 4676 (3774 to 5461) | -15.89 (-39.57 to 19.52)  | 234245 (162916 to 293663) | 232464 (179903 to 291090) | -0.76 (-26.71 to 54.23)  |
| Colombia                 | 6732 (5626 to 7997)       | 15348 (13025 to 18234)     | 127.99 (113.25 to 144.58) | 56 (48 to 61)       | 154 (116 to 202)    | 175.73 (106.78 to 258.47) | 3215 (2689 to 3798)       | 6419 (4991 to 7986)       | 99.66 (64.35 to 143.95)  |
| Comoros                  | 21 (17 to 26)             | 48 (39 to 60)              | 123.01 (106.31 to 142.32) | 2 (1 to 3)          | 4 (2 to 6)          | 81.66 (13.33 to 277.77)   | 77 (29 to 137)            | 119 (75 to 174)           | 54.58 (-16.19 to 298.98) |
| Congo                    | 145 (120 to 178)          | 421 (343 to 518)           | 189.59 (170.45 to 215.68) | 9 (6 to 14)         | 17 (12 to 25)       | 87.61 (15.68 to 196.61)   | 396 (237 to 645)          | 681 (463 to 980)          | 72.21 (-4.05 to 195.14)  |
| Cook Islands             | 1 (1 to 1)                | 1 (1 to 2)                 | 28.57 (18.27 to 40.87)    | 0 (0 to 0)          | 0 (0 to 0)          | -14.75 (-42.49 to 32.51)  | 8 (5 to 11)               | 5 (3 to 7)                | -33.66 (-57.85 to 4.48)  |
| Costa Rica               | 670 (560 to 796)          | 1637 (1380 to 1937)        | 144.55 (127.55 to 162.48) | 3 (2 to 3)          | 10 (7 to 13)        | 270.81 (169.90 to 398.49) | 190 (150 to 238)          | 524 (399 to 669)          | 176.16 (128 to 235.84)   |
| Côte d'Ivoire            | 578 (465 to 714)          | 1562 (1251 to 1950)        | 170.18 (151.08 to 189.28) | 25 (11 to 42)       | 54 (32 to 79)       | 111.95 (32.09 to 191.81)  | 1324 (535 to 2260)        | 2583 (1501 to 3952)       | 95.11 (14.75 to 276.09)  |

|                                       |                        |                        |                           |                 |                  |                          |                      |                       |                          |
|---------------------------------------|------------------------|------------------------|---------------------------|-----------------|------------------|--------------------------|----------------------|-----------------------|--------------------------|
|                                       |                        |                        | 190.01)                   |                 |                  | 290.61)                  |                      |                       |                          |
| Croatia                               | 9449 (8823 to 10129)   | 10780 (9980 to 11592)  | 14.09 (9.79 to 18.67)     | 16 (14 to 24)   | 33 (25 to 42)    | 106.49 (18.11 to 180.74) | 1866 (1411 to 2410)  | 2288 (1717 to 2898)   | 22.61 (2.99 to 39.06)    |
| Cuba                                  | 3240 (2702 to 3901)    | 4574 (3750 to 5525)    | 41.18 (29.72 to 54.70)    | 36 (23 to 43)   | 42 (33 to 53)    | 16.33 (-11.71 to 79.06)  | 1518 (1151 to 1818)  | 1682 (1335 to 2085)   | 10.76 (-8.18 to 38.33)   |
| Cyprus                                | 344 (292 to 400)       | 962 (870 to 1050)      | 179.86 (151.26 to 216.30) | 12 (7 to 16)    | 16 (12 to 20)    | 35.72 (-8.18 to 121.22)  | 257 (180 to 333)     | 370 (303 to 444)      | 43.92 (7.35 to 105.55)   |
| Czechia                               | 10218 (8616 to 12269)  | 20802 (19084 to 22519) | 103.57 (74.68 to 138.01)  | 71 (64 to 82)   | 114 (87 to 141)  | 59.45 (13.25 to 100.62)  | 3246 (2697 to 3932)  | 5259 (4127 to 6597)   | 62.01 (34.95 to 90.03)   |
| Democratic People's Republic of Korea | 3097 (2554 to 3714)    | 4965 (4120 to 5978)    | 60.33 (48.19 to 72.89)    | 74 (41 to 114)  | 108 (75 to 147)  | 45.76 (-9.28 to 166.1)   | 3363 (1697 to 6033)  | 3161 (2323 to 4117)   | -5.99 (-46.37 to 81.39)  |
| Democratic Republic of the Congo      | 1975 (1605 to 2418)    | 4445 (3597 to 5502)    | 125.06 (107.08 to 145.69) | 130 (79 to 207) | 231 (159 to 336) | 77.23 (4.65 to 194.58)   | 6456 (3284 to 12595) | 10018 (6738 to 15367) | 55.18 (-21.39 to 209.02) |
| Denmark                               | 13729 (12468 to 15154) | 15310 (13920 to 16882) | 11.51 (5.37 to 17.43)     | 43 (38 to 50)   | 70 (60 to 83)    | 65.35 (42.63 to 92.58)   | 2893 (2227 to 3654)  | 3391 (2644 to 4239)   | 17.21 (8.04 to 27.16)    |
| Djibouti                              | 20 (16 to 25)          | 90 (72 to 111)         | 342.41 (307.26 to 378.51) | 1 (1 to 2)      | 3 (2 to 5)       | 190.20 (72.46 to 408.23) | 60 (27 to 121)       | 144 (88 to 236)       | 138.93 (25.91 to 367.14) |
| Dominica                              | 19 (16 to 23)          | 22 (18 to 27)          | 17.43 (7.09 to 28.52)     | 1 (1 to 1)      | 1 (0 to 1)       | -9.08 (-35.39 to 27.05)  | 23 (19 to 28)        | 21 (16 to 27)         | -11.16 (-34.54 to 19.86) |
| Dominican Republic                    | 1239 (1022 to 1507)    | 2521 (2070 to 3084)    | 103.40 (87.28 to 121.86)  | 11 (9 to 16)    | 22 (16 to 30)    | 99.41 (29.65 to 202.38)  | 732 (527 to 1060)    | 1109 (821 to 1450)    | 51.44 (0.42 to 118.17)   |
| Ecuador                               | 1159 (1021 to 1302)    | 3315 (2981 to 3667)    | 186.04 (172.00 to 200.27) | 16 (12 to 21)   | 34 (24 to 44)    | 107.95 (37.86 to 223.02) | 982 (705 to 1302)    | 1475 (1120 to 1823)   | 50.25 (3.59 to 124.68)   |
| Egypt                                 | 17107 (14592 to 19726) | 39271 (31782 to 48388) | 129.56 (97.49 to 159.21)  | 59 (35 to 119)  | 119 (70 to 186)  | 100.85 (5.49 to 238.69)  | 4521 (3160 to 6354)  | 9453 (6709 to 12613)  | 109.10 (57.59 to 171.14) |
| El Salvador                           | 842 (701 to 998)       | 1478 (1239 to 1741)    | 75.42 (62.88 to 87.97)    | 13 (8 to 16)    | 9 (7 to 12)      | -28.67 (-54.13 to 18.21) | 661 (461 to 881)     | 437 (329 to 574)      | -33.83 (-55.24 to -1.58) |
| Equatorial Guinea                     | 19 (16 to 24)          | 95 (79 to 117)         | 397.19 (353.40 to 443.01) | 2 (1 to 3)      | 3 (2 to 4)       | 66.29 (-6.86 to 195.01)  | 73 (37 to 135)       | 119 (73 to 184)       | 63.28 (-22.44 to 233.97) |



|           |                             |                              |                              |                    |                     |                             |                           |                            |                              |
|-----------|-----------------------------|------------------------------|------------------------------|--------------------|---------------------|-----------------------------|---------------------------|----------------------------|------------------------------|
| Eritrea   | 114 (93 to 141)             | 327 (263 to 398)             | 186.49<br>(164.83 to 210.17) | 9 (4 to 17)        | 23 (15 to 34)       | 165.47<br>(22.99 to 516.12) | 474 (168 to 1107)         | 1017 (645 to 1643)         | 114.61<br>(-12.62 to 493.09) |
| Estonia   | 1311 (1148 to 1494)         | 1821 (1593 to 2066)          | 38.90 (26.62 to 51.17)       | 10 (9 to 12)       | 9 (6 to 11)         | -17.88<br>(-40.41 to 15.88) | 511 (425 to 601)          | 448 (341 to 573)           | -12.32<br>(-28.71 to 9.89)   |
| Eswatini  | 38 (31 to 47)               | 80 (65 to 98)                | 109.48<br>(95.32 to 125.52)  | 2 (1 to 3)         | 4 (2 to 5)          | 72.30 (1.22 to 254.21)      | 106 (47 to 206)           | 153 (101 to 227)           | 44.21<br>(-27.03 to 242.69)  |
| Ethiopia  | 1763 (1447 to 2135)         | 4457 (3634 to 5454)          | 152.76<br>(143.58 to 162.31) | 219 (128 to 398)   | 325 (197 to 489)    | 48.24<br>(-33.27 to 200.06) | 11296 (4911 to 25054)     | 12866 (8426 to 19913)      | 13.90<br>(-51.97 to 197.17)  |
| Fiji      | 28 (23 to 34)               | 42 (35 to 52)                | 50.29 (36.12 to 66.63)       | 1 (1 to 2)         | 2 (1 to 2)          | 27.79<br>(-16.31 to 91.11)  | 59 (45 to 80)             | 68 (49 to 91)              | 14.67<br>(-24.77 to 72.54)   |
| Finland   | 9450 (8777 to 10150)        | 19960<br>(17972 to 22078)    | 111.22<br>(94.08 to 127.73)  | 33 (24 to 39)      | 39 (33 to 46)       | 18.82 (-5.40 to 68.55)      | 2012 (1537 to 2571)       | 3465 (2517 to 4569)        | 72.24 (51.93 to 93.91)       |
| France    | 60982<br>(55563 to 66348)   | 101092<br>(91225 to 111418)  | 65.77 (54.06 to 77.24)       | 943 (807 to 1043)  | 2181 (1253 to 2615) | 131.25<br>(51.63 to 168.76) | 23073<br>(19741 to 26699) | 40856<br>(30081 to 48291)  | 77.07 (34.58 to 97.82)       |
| Gabon     | 65 (54 to 80)               | 163 (134 to 201)             | 150.81<br>(132.67 to 173.19) | 4 (2 to 6)         | 5 (4 to 8)          | 52.52 (-4.74 to 134.04)     | 144 (85 to 223)           | 205 (137 to 294)           | 42.02<br>(-13.99 to 140.73)  |
| Gambia    | 49 (39 to 60)               | 130 (105 to 161)             | 162.91<br>(142.17 to 186.15) | 3 (1 to 5)         | 5 (3 to 7)          | 85.18 (3.78 to 214.51)      | 132 (63 to 243)           | 215 (140 to 298)           | 62.69 (-6.86 to 192.83)      |
| Georgia   | 5100 (4308 to 6037)         | 4210 (3545 to 5060)          | -17.45<br>(-22.85 to -11.71) | 16 (10 to 22)      | 17 (10 to 22)       | 3.41 (-22.82 to 40.33)      | 1222 (911 to 1581)        | 991 (741 to 1269)          | -18.96<br>(-30.33 to -5.81)  |
| Germany   | 101153<br>(87240 to 117946) | 236048<br>(208508 to 266966) | 133.36<br>(115.87 to 150.36) | 1201 (987 to 2011) | 4286 (3156 to 4903) | 256.72<br>(63.30 to 351.66) | 37493<br>(30500 to 51704) | 92002<br>(74718 to 107721) | 145.38<br>(51.12 to 187.04)  |
| Ghana     | 982 (800 to 1189)           | 2894 (2355 to 3533)          | 194.61<br>(176.45 to 216.26) | 56 (24 to 95)      | 103 (57 to 155)     | 84.24 (5.66 to 242.87)      | 2633 (1097 to 4201)       | 4506 (2554 to 6654)        | 71.16 (2.12 to 227.26)       |
| Greece    | 12180<br>(10236 to 14240)   | 10403 (9422 to 11537)        | -14.59<br>(-23.98 to -3.38)  | 35 (30 to 40)      | 66 (54 to 80)       | 86.77 (51.57 to 131.14)     | 2407 (1790 to 3170)       | 2424 (1911 to 3027)        | 0.69 (-13.02 to 15.85)       |
| Greenland | 78 (64 to 92)               | 108 (92 to 125)              | 39.24 (25.78 to 55.52)       | 0 (0 to 0)         | 0 (0 to 1)          | 147.84<br>(18.45 to 275.98) | 17 (13 to 23)             | 25 (19 to 33)              | 49.12 (13.65 to 82.39)       |
| Grenada   | 16 (13 to 19)               | 28 (23 to 35)                | 76.27 (60.87 to 93.49)       | 1 (1 to 1)         | 1 (1 to 2)          | 29.20 (-4.73 to 79.53)      | 33 (27 to 39)             | 43 (36 to 52)              | 30.86 (1.58 to 68.87)        |

|                            |                           |                           |                           |                     |                     |                          |                          |                           |                          |
|----------------------------|---------------------------|---------------------------|---------------------------|---------------------|---------------------|--------------------------|--------------------------|---------------------------|--------------------------|
|                            |                           |                           |                           |                     |                     | 21.60                    |                          |                           |                          |
| Guam                       | 8 (6 to 9)                | 12 (10 to 14)             | 49.19 (36.21 to 64.35)    | 0 (0 to 0)          | 0 (0 to 0)          | (-20.17 to 84.57)        | 9 (7 to 12)              | 9 (7 to 13)               | 2.91 (-31.52 to 53.3)    |
| Guatemala                  | 1041 (867 to 1243)        | 3192 (2680 to 3791)       | 206.76 (185.26 to 227.66) | 13 (8 to 22)        | 35 (27 to 45)       | 180.16 (34.43 to 377.94) | 866 (522 to 1506)        | 1761 (1381 to 2210)       | 103.35 (6.31 to 246.71)  |
| Guinea                     | 309 (251 to 384)          | 677 (543 to 826)          | 119.23 (103.12 to 138.21) | 19 (6 to 34)        | 29 (14 to 46)       | 49.62 (-7.31 to 159.78)  | 1008 (272 to 2032)       | 1414 (609 to 2445)        | 40.38 (-20.12 to 170.29) |
| Guinea-Bissau              | 44 (36 to 54)             | 103 (83 to 126)           | 134.63 (116.21 to 153.25) | 4 (2 to 7)          | 6 (3 to 8)          | 39.91 (-18.84 to 175.43) | 201 (66 to 403)          | 265 (152 to 392)          | 31.85 (-30.36 to 186.15) |
| Guyana                     | 126 (103 to 152)          | 170 (139 to 210)          | 35.00 (24.45 to 45.80)    | 5 (4 to 6)          | 6 (5 to 9)          | 20.04 (-18.42 to 74.53)  | 239 (189 to 291)         | 257 (191 to 336)          | 7.22 (-25.07 to 53.03)   |
| Haiti                      | 860 (708 to 1057)         | 1916 (1570 to 2384)       | 122.68 (105.23 to 142.3)  | 58 (24 to 105)      | 85 (45 to 125)      | 45.78 (-11 to 148.4)     | 3030 (946 to 6879)       | 3782 (1875 to 6104)       | 24.85 (-33.53 to 156.75) |
| Honduras                   | 619 (513 to 734)          | 1803 (1499 to 2141)       | 191.20 (171.74 to 211.20) | 22 (14 to 31)       | 50 (31 to 69)       | 128.99 (47.94 to 251.69) | 1240 (712 to 1929)       | 1816 (1191 to 2508)       | 46.37 (-11.95 to 139.27) |
| Hungary                    | 24215 (21977 to 26809)    | 42233 (39099 to 45377)    | 74.41 (64.26 to 86.04)    | 84 (76 to 109)      | 100 (80 to 128)     | 19.27 (-4.55 to 45.83)   | 5849 (4647 to 7201)      | 8339 (6257 to 10544)      | 42.56 (25.99 to 56.19)   |
| Iceland                    | 357 (301 to 420)          | 872 (752 to 1007)         | 144.33 (123.25 to 167.58) | 2 (2 to 2)          | 4 (3 to 5)          | 107.81 (52.43 to 151.5)  | 90 (71 to 113)           | 187 (142 to 239)          | 107.79 (81.26 to 131.98) |
| India                      | 133927 (107800 to 166434) | 270719 (219873 to 332264) | 102.14 (95.94 to 110.29)  | 2770 (1783 to 3802) | 4214 (2950 to 5531) | 52.13 (19.29 to 98.65)   | 127568 (77798 to 169843) | 164416 (117527 to 208276) | 28.89 (1.40 to 72.21)    |
| Indonesia                  | 5025 (3974 to 6141)       | 11410 (9158 to 13704)     | 127.09 (115.15 to 141.04) | 704 (401 to 910)    | 913 (582 to 1179)   | 29.58 (2.63 to 76.95)    | 26026 (16965 to 34445)   | 24943 (18268 to 32252)    | -4.16 (-31.91 to 42.06)  |
| Iran (Islamic Republic of) | 14964 (12153 to 18513)    | 40493 (32952 to 49751)    | 170.60 (160.28 to 181.00) | 51 (33 to 68)       | 132 (55 to 164)     | 158.02 (43.67 to 247.65) | 4022 (3121 to 5103)      | 9481 (6679 to 12439)      | 135.71 (84.19 to 177.03) |
| Iraq                       | 2270 (1890 to 2694)       | 10029 (8221 to 12199)     | 341.76 (303.6 to 377.49)  | 34 (21 to 51)       | 51 (38 to 67)       | 52.37 (-14.19 to 162.33) | 2135 (1267 to 3447)      | 3719 (2808 to 4931)       | 74.13 (2.20 to 190.75)   |
| Ireland                    | 3253 (2736 to 3869)       | 5762 (4988 to 6655)       | 77.13 (58.69 to 97.43)    | 33 (29 to 37)       | 51 (41 to 65)       | 53.61 (25.28 to 93.62)   | 1106 (922 to 1332)       | 1623 (1294 to 2033)       | 46.76 (29.96 to 67.57)   |
| Israel                     | 3274 (2767 to 3882)       | 6640 (5924 to 7451)       | 102.78 (76.8 to 132.02)   | 22 (18 to 24)       | 46 (38 to 63)       | 111.01 (70.80 to 199.17) | 1000 (812 to 1229)       | 1851 (1484 to 2306)       | 85.14 (61.05 to 116.46)  |

|                                        |                                 |                                 |                                 |                     |                       |                                 |                              |                              |                                 |
|----------------------------------------|---------------------------------|---------------------------------|---------------------------------|---------------------|-----------------------|---------------------------------|------------------------------|------------------------------|---------------------------------|
| Italy                                  | 183929<br>(159353 to<br>209220) | 186447<br>(165268 to<br>209019) | 1.37 (-2.84<br>to 6.10)         | 351 (310 to<br>581) | 1305 (944 to<br>1468) | 272.23<br>(70.52 to<br>339.63)  | 33890<br>(24913 to<br>43884) | 44427<br>(34629 to<br>54814) | 31.09 (5.26<br>to 46.90)        |
| Jamaica                                | 543 (455 to<br>648)             | 884 (737 to<br>1059)            | 62.81 (49.97<br>to 76.46)       | 6 (4 to 7)          | 7 (5 to 10)           | 21.88<br>(-16.58 to<br>110.45)  | 304 (231 to<br>367)          | 343 (264 to<br>432)          | 12.67<br>(-13.90 to<br>66.78)   |
| Japan                                  | 236120<br>(196281 to<br>281825) | 408632<br>(353858 to<br>468152) | 73.06 (59.11<br>to 88.73)       | 367 (270 to<br>394) | 452 (350 to<br>629)   | 23.32 (1.39<br>to 112.57)       | 41769<br>(30062 to<br>56026) | 67424<br>(46877 to<br>91495) | 61.42 (48.32<br>to 75.54)       |
| Jordan                                 | 1611 (1394<br>to 1851)          | 11508 (9646<br>to 13565)        | 614.12<br>(540.91 to<br>683.77) | 6 (4 to 8)          | 13 (10 to<br>17)      | 135.70<br>(49.91 to<br>281.75)  | 452 (339 to<br>570)          | 2155 (1536<br>to 2953)       | 376.81<br>(274.79 to<br>495.45) |
| Kazakhstan                             | 11689 (9797<br>to 14063)        | 15823<br>(13219 to<br>18930)    | 35.36 (26.10<br>to 46.10)       | 76 (56 to<br>95)    | 82 (66 to<br>100)     | 7.52 (-17.29<br>to 48.48)       | 4458 (3567<br>to 5515)       | 5172 (4164<br>to 6466)       | 16.03 (-1.28<br>to 37.13)       |
| Kenya                                  | 868 (711 to<br>1056)            | 2870 (2364<br>to 3474)          | 230.72<br>(219.85 to<br>242.5)  | 74 (46 to<br>125)   | 180 (111 to<br>265)   | 144.03<br>(82.74 to<br>228.15)  | 3011 (1930<br>to 4593)       | 6453 (4376<br>to 9370)       | 114.3 (40.66<br>to 213.60)      |
| Kiribati                               | 2 (2 to 3)                      | 4 (3 to 4)                      | 60.33 (46.38<br>to 76.77)       | 1 (0 to 1)          | 1 (0 to 1)            | 5.25 (-33.24<br>to 73.45)       | 28 (11 to<br>58)             | 30 (14 to<br>55)             | 4.10 (-35.53<br>to 92.08)       |
| Kuwait                                 | 863 (798 to<br>937)             | 2857 (2338<br>to 3483)          | 230.91<br>(174.37 to<br>298.63) | 1 (1 to 2)          | 4 (3 to 5)            | 195.71<br>(125.48 to<br>314.39) | 188 (140 to<br>241)          | 558 (391 to<br>755)          | 197.49<br>(143.44 to<br>262.68) |
| Kyrgyzstan                             | 2526 (2126<br>to 3008)          | 4283 (3592<br>to 5083)          | 69.58 (59.46<br>to 81.49)       | 15 (10 to<br>19)    | 10 (8 to 12)          | -36.11<br>(-51.26 to<br>14.99)  | 1109 (784 to<br>1376)        | 1031 (789 to<br>1325)        | -7.05<br>(-27.91 to<br>29.99)   |
| Lao People's<br>Democratic<br>Republic | 90 (70 to<br>113)               | 241 (191 to<br>300)             | 167.27<br>(144.93 to<br>193.03) | 10 (5 to 15)        | 11 (6 to 17)          | 8.81 (-34.31<br>to 91.32)       | 385 (177 to<br>639)          | 387 (234 to<br>610)          | 0.50 (-45.77<br>to 106.92)      |
| Latvia                                 | 3273 (2810<br>to 3770)          | 3226 (2843<br>to 3623)          | -1.44 (-8.09<br>to 5.70)        | 12 (10 to<br>14)    | 14 (11 to<br>17)      | 18.35 (-5.77<br>to 47.79)       | 811 (632 to<br>1017)         | 779 (605 to<br>981)          | -4.01<br>(-15.43 to<br>8.10)    |
| Lebanon                                | 881 (721 to<br>1091)            | 2494 (2037<br>to 3050)          | 182.89<br>(160.10 to<br>205.97) | 3 (2 to 4)          | 8 (4 to 12)           | 146.92<br>(25.25 to<br>359.10)  | 220 (161 to<br>297)          | 545 (394 to<br>737)          | 148.06<br>(90.21 to<br>219.00)  |
| Lesotho                                | 95 (78 to<br>115)               | 150 (122 to<br>185)             | 58.00 (46.76<br>to 69.06)       | 6 (4 to 8)          | 9 (6 to 12)           | 51.75<br>(-12.69 to<br>142.65)  | 222 (137 to<br>323)          | 326 (210 to<br>480)          | 46.51<br>(-15.14 to<br>129.83)  |
| Liberia                                | 104 (85 to<br>129)              | 288 (233 to<br>354)             | 176.51<br>(154.41 to<br>199.50) | 7 (3 to 12)         | 11 (6 to 17)          | 46.34<br>(-18.23 to<br>235.23)  | 360 (108 to<br>705)          | 490 (271 to<br>833)          | 35.96<br>(-36.97 to<br>268.26)  |
| Libya                                  | 629 (514 to<br>759)             | 1910 (1557<br>to 2333)          | 203.80<br>(175.90 to<br>233.83) | 4 (3 to 7)          | 11 (7 to 15)          | 159.15<br>(33.45 to<br>345.08)  | 229 (166 to<br>324)          | 595 (436 to<br>782)          | 160.02<br>(65.02 to<br>262.55)  |

|                                  |                        |                        |                           |                  |                  |                           |                      |                        |                          |
|----------------------------------|------------------------|------------------------|---------------------------|------------------|------------------|---------------------------|----------------------|------------------------|--------------------------|
| Lithuania                        | 4535 (3980 to 5145)    | 4848 (4481 to 5210)    | 6.90 (-3.51 to 20.95)     | 14 (10 to 16)    | 18 (14 to 23)    | 26.29 (-2.24 to 67.72)    | 1054 (817 to 1321)   | 1105 (861 to 1375)     | 4.77 (-8.66 to 20.85)    |
| Luxembourg                       | 775 (680 to 879)       | 1503 (1318 to 1707)    | 93.98 (81.65 to 107.23)   | 5 (4 to 6)       | 11 (8 to 13)     | 124.41 (55.78 to 172.33)  | 202 (162 to 247)     | 376 (297 to 471)       | 85.81 (59.15 to 105.40)  |
| Madagascar                       | 490 (401 to 604)       | 1330 (1089 to 1651)    | 171.16 (153.22 to 190.88) | 36 (17 to 60)    | 69 (48 to 103)   | 92.10 (5.72 to 331.04)    | 1875 (646 to 3722)   | 3000 (2035 to 4374)    | 60.01 (-23.07 to 329.63) |
| Malawi                           | 336 (273 to 415)       | 741 (603 to 910)       | 120.33 (105.3 to 136.64)  | 39 (19 to 76)    | 55 (38 to 78)    | 39.48 (-33.91 to 218.89)  | 2236 (716 to 5491)   | 2323 (1541 to 3545)    | 3.89 (-57.34 to 225.03)  |
| Malaysia                         | 638 (533 to 747)       | 2165 (1879 to 2498)    | 239.19 (213.74 to 272.55) | 16 (13 to 20)    | 41 (30 to 56)    | 157.56 (64.69 to 265.74)  | 612 (503 to 742)     | 1434 (1090 to 1814)    | 134.26 (68.55 to 208.48) |
| Maldives                         | 6 (5 to 7)             | 27 (21 to 33)          | 357.26 (319.05 to 402.53) | 0 (0 to 1)       | 1 (1 to 1)       | 97.39 (13.04 to 268.14)   | 19 (10 to 33)        | 29 (23 to 38)          | 58.10 (-20.10 to 218.81) |
| Mali                             | 396 (321 to 489)       | 1033 (841 to 1256)     | 161.12 (141.84 to 182.05) | 29 (9 to 53)     | 55 (26 to 93)    | 90.14 (10.52 to 338.68)   | 1569 (384 to 3318)   | 2748 (1107 to 5138)    | 75.21 (-6.44 to 320.25)  |
| Malta                            | 275 (237 to 318)       | 390 (346 to 441)       | 42.03 (32.40 to 52.30)    | 2 (2 to 2)       | 6 (5 to 7)       | 182.23 (117.73 to 248.53) | 84 (68 to 102)       | 149 (123 to 178)       | 77.16 (51.73 to 106.18)  |
| Marshall Islands                 | 1 (1 to 1)             | 2 (2 to 3)             | 81.58 (65.63 to 99.90)    | 0 (0 to 0)       | 0 (0 to 0)       | 14.19 (-33.41 to 79.45)   | 10 (6 to 17)         | 12 (6 to 20)           | 15.49 (-36.36 to 90.92)  |
| Mauritania                       | 118 (96 to 144)        | 330 (270 to 405)       | 179.57 (158.4 to 202.27)  | 8 (4 to 11)      | 9 (6 to 13)      | 19.95 (-22.88 to 109.37)  | 322 (167 to 487)     | 376 (245 to 543)       | 16.93 (-28.24 to 120.07) |
| Mauritius                        | 47 (37 to 58)          | 86 (69 to 102)         | 81.67 (65.36 to 99.25)    | 1 (1 to 1)       | 3 (3 to 4)       | 176.18 (101.94 to 258.21) | 50 (43 to 61)        | 117 (90 to 147)        | 134.12 (70.2 to 198.45)  |
| Mexico                           | 25697 (21937 to 30082) | 46570 (40040 to 53889) | 81.22 (75.62 to 87.02)    | 157 (142 to 176) | 519 (408 to 622) | 229.87 (156.16 to 297.06) | 9626 (8180 to 11411) | 21132 (17386 to 25318) | 119.55 (86.73 to 154.33) |
| Micronesia (Federated States of) | 3 (2 to 4)             | 4 (3 to 5)             | 26.76 (16.02 to 38.96)    | 1 (0 to 1)       | 1 (0 to 1)       | -23.01 (-59.09 to 31.38)  | 28 (16 to 49)        | 20 (10 to 38)          | -27.22 (-62.97 to 22.93) |
| Monaco                           | 43 (36 to 51)          | 59 (50 to 69)          | 37.31 (28.37 to 47.29)    | 0 (0 to 0)       | 0 (0 to 1)       | 37.96 (-4.38 to 94.10)    | 11 (8 to 14)         | 14 (11 to 18)          | 30.63 (10.51 to 53.62)   |
| Mongolia                         | 961 (801 to 1153)      | 2328 (1907 to 2810)    | 142.14 (124.80 to 161.08) | 11 (6 to 15)     | 12 (9 to 16)     | 11.41 (-26.46 to 89.38)   | 690 (380 to 1073)    | 814 (620 to 1028)      | 17.92 (-26.45 to 100.76) |
| Montenegro                       | 879 (744 to 1051)      | 1051 (890 to 1212)     | 19.54 (12.1 to 26.98)     | 2 (1 to 2)       | 3 (2 to 3)       | 48.81 (1.77 to 95.85)     | 191 (145 to 237)     | 221 (165 to 277)       | 15.74 (1.68 to 29.80)    |

|                          |                        |                        |                           |                  |                  |                           |                       |                        |                          |
|--------------------------|------------------------|------------------------|---------------------------|------------------|------------------|---------------------------|-----------------------|------------------------|--------------------------|
|                          | 1032)                  | 1240)                  | to 27.53)                 |                  |                  | to 101.73)                | 247)                  | 288)                   | to 30.37)                |
| Morocco                  | 3007 (2487 to 3582)    | 6614 (5488 to 7909)    | 119.98 (105.44 to 135.91) | 31 (19 to 48)    | 59 (41 to 77)    | 91.82 (30.18 to 192.53)   | 1438 (989 to 2101)    | 2615 (1988 to 3373)    | 81.81 (30.04 to 139.60)  |
| Mozambique               | 487 (397 to 601)       | 1111 (897 to 1347)     | 128.31 (112.18 to 146.62) | 52 (30 to 88)    | 107 (71 to 154)  | 107.07 (16.28 to 270.37)  | 2567 (1058 to 5668)   | 4503 (2907 to 7196)    | 75.44 (-18.50 to 319.21) |
| Myanmar                  | 1024 (797 to 1272)     | 2062 (1656 to 2558)    | 101.31 (83.73 to 120.83)  | 60 (34 to 95)    | 59 (44 to 82)    | -0.68 (-40.07 to 64.77)   | 2820 (1386 to 5128)   | 2258 (1680 to 3215)    | -19.94 (-57.94 to 48.65) |
| Namibia                  | 87 (72 to 108)         | 217 (175 to 268)       | 148.34 (130.13 to 167.81) | 6 (4 to 8)       | 9 (6 to 13)      | 61.81 (0.64 to 190.79)    | 218 (129 to 344)      | 333 (223 to 498)       | 52.64 (-12.57 to 213.41) |
| Nauru                    | 0 (0 to 0)             | 0 (0 to 0)             | 12.57 (3.45 to 21.62)     | 0 (0 to 0)       | 0 (0 to 0)       | -34.79 (-63.12 to 6.11)   | 3 (1 to 6)            | 2 (1 to 4)             | -34.16 (-60.95 to 18.41) |
| Nepal                    | 2180 (1726 to 2758)    | 5036 (4049 to 6194)    | 131.04 (112.62 to 151.30) | 93 (56 to 165)   | 115 (71 to 190)  | 23.09 (-15.11 to 93.10)   | 3780 (2183 to 5903)   | 3819 (2683 to 5781)    | 1.05 (-34.25 to 65.01)   |
| Netherlands              | 24401 (22175 to 26704) | 16251 (13975 to 18987) | -33.4 (-41.14 to -24.18)  | 278 (240 to 344) | 782 (582 to 906) | 180.66 (78.32 to 230.31)  | 8234 (6818 to 9979)   | 12100 (10246 to 13731) | 46.95 (10.86 to 70.21)   |
| New Zealand              | 5873 (5089 to 6670)    | 8600 (7850 to 9491)    | 46.45 (37.95 to 57.06)    | 20 (17 to 22)    | 31 (26 to 39)    | 58.14 (32.29 to 109.75)   | 1267 (976 to 1592)    | 1758 (1327 to 2254)    | 38.84 (26.73 to 54.82)   |
| Nicaragua                | 500 (414 to 598)       | 1453 (1218 to 1720)    | 190.37 (167.53 to 212.17) | 3 (2 to 3)       | 7 (6 to 9)       | 177.21 (99.51 to 267.74)  | 187 (149 to 245)      | 444 (340 to 555)       | 137.59 (85.21 to 192.36) |
| Niger                    | 321 (256 to 395)       | 942 (760 to 1154)      | 193.63 (171.22 to 216.83) | 27 (9 to 54)     | 55 (26 to 95)    | 106.00 (18.53 to 313.02)  | 1564 (379 to 3724)    | 2835 (1120 to 5521)    | 81.21 (-7.73 to 318.21)  |
| Nigeria                  | 5162 (4259 to 6269)    | 14578 (11955 to 17708) | 182.41 (176.97 to 187.98) | 314 (165 to 514) | 560 (306 to 909) | 78.53 (23.85 to 168.11)   | 15139 (7194 to 24017) | 26794 (15017 to 42474) | 76.98 (13.30 to 185.01)  |
| Niue                     | 0 (0 to 0)             | 0 (0 to 0)             | -12.86 (-20.01 to -3.97)  | 0 (0 to 0)       | 0 (0 to 0)       | -42.22 (-65.13 to -10.86) | 1 (0 to 1)            | 0 (0 to 1)             | -45.91 (-68.37 to -8.78) |
| North Macedonia          | 2473 (2098 to 2927)    | 3374 (2855 to 3973)    | 36.41 (27.51 to 46.86)    | 4 (3 to 4)       | 5 (3 to 6)       | 37.22 (1.2 to 83.42)      | 490 (358 to 648)      | 635 (459 to 844)       | 29.55 (14.26 to 46.45)   |
| Northern Mariana Islands | 3 (2 to 3)             | 3 (3 to 4)             | 17.67 (3.72 to 33.96)     | 0 (0 to 0)       | 0 (0 to 0)       | -44.77 (-70.47 to 26.41)  | 12 (8 to 19)          | 5 (4 to 9)             | -57.52 (-77.38 to -4.80) |
| Norway                   | 20686 (17395 to 24323) | 33097 (28492 to 37859) | 60.00 (50.85 to 68.77)    | 29 (26 to 41)    | 38 (32 to 55)    | 30.65 (17.07 to 54.59)    | 3551 (2585 to 4687)   | 5414 (3835 to 7244)    | 52.44 (44.12 to 61.59)   |

|                     |                           |                        |                           |                  |                  |                           |                        |                        |                           |
|---------------------|---------------------------|------------------------|---------------------------|------------------|------------------|---------------------------|------------------------|------------------------|---------------------------|
| Oman                | 431 (347 to 517)          | 1575 (1266 to 1924)    | 265.15 (237.03 to 297.09) | 2 (1 to 3)       | 4 (3 to 5)       | 135.73 (37.95 to 331.56)  | 122 (85 to 178)        | 375 (271 to 496)       | 206.46 (111.98 to 320.55) |
| Pakistan            | 9984 (7995 to 12369)      | 26815 (21768 to 33849) | 168.59 (154.72 to 184.98) | 454 (240 to 866) | 657 (447 to 993) | 44.84 (-2.73 to 133.76)   | 16234 (9791 to 26748)  | 27286 (18727 to 38379) | 68.08 (19.36 to 148.68)   |
| Palau               | 1 (1 to 1)                | 1 (1 to 1)             | 58.71 (43.16 to 76.15)    | 0 (0 to 0)       | 0 (0 to 0)       | 23.28 (-26.34 to 101.05)  | 3 (2 to 7)             | 4 (2 to 6)             | 14.99 (-29.80 to 103.99)  |
| Palestine           | 374 (305 to 450)          | 1351 (1104 to 1621)    | 261.47 (229.04 to 293.11) | 3 (2 to 4)       | 4 (3 to 6)       | 49.80 (-14.64 to 127.75)  | 132 (92 to 195)        | 320 (235 to 443)       | 142.19 (82.43 to 220.08)  |
| Panama              | 553 (471 to 638)          | 1338 (1131 to 1560)    | 141.92 (123.11 to 161.72) | 7 (6 to 10)      | 25 (19 to 32)    | 239.99 (135.70 to 373.74) | 436 (347 to 538)       | 1002 (763 to 1297)     | 129.97 (65.87 to 224.87)  |
| Papua New Guinea    | 116 (92 to 140)           | 285 (229 to 350)       | 145.64 (124.56 to 168.38) | 13 (7 to 20)     | 25 (16 to 38)    | 95.85 (20.41 to 222.69)   | 661 (335 to 1140)      | 1258 (758 to 2034)     | 90.40 (5.88 to 270.52)    |
| Paraguay            | 996 (853 to 1165)         | 1956 (1652 to 2324)    | 96.35 (82.38 to 111.71)   | 4 (4 to 5)       | 12 (8 to 16)     | 171.03 (73.55 to 302.03)  | 327 (263 to 404)       | 647 (481 to 831)       | 97.76 (55.83 to 147.82)   |
| Peru                | 2566 (2121 to 3079)       | 5665 (4638 to 6822)    | 120.79 (105.66 to 138.38) | 128 (74 to 194)  | 76 (54 to 105)   | -40.28 (-66.32 to 19.96)  | 8234 (3972 to 13912)   | 3118 (2308 to 4194)    | -62.13 (-79.74 to -11.96) |
| Philippines         | 2067 (1630 to 2519)       | 5073 (4044 to 6166)    | 145.40 (135.48 to 156.45) | 98 (54 to 125)   | 117 (95 to 155)  | 19.59 (-15.39 to 149.06)  | 3743 (2419 to 4551)    | 4556 (3797 to 5981)    | 21.71 (-7.83 to 121.46)   |
| Poland              | 177477 (149170 to 211629) | 88307 (77909 to 99826) | -50.24 (-54.72 to -45.27) | 180 (168 to 211) | 361 (281 to 426) | 99.98 (43.08 to 136.68)   | 30297 (21831 to 40254) | 20081 (15602 to 25064) | -33.72 (-41.18 to -24.23) |
| Portugal            | 6035 (5365 to 6750)       | 9894 (8866 to 11003)   | 63.94 (50.98 to 79.42)    | 81 (72 to 90)    | 306 (158 to 363) | 277.16 (96.34 to 355.45)  | 2425 (2073 to 2832)    | 5332 (3507 to 6256)    | 119.87 (37.89 to 153.53)  |
| Puerto Rico         | 1123 (1058 to 1194)       | 1442 (1320 to 1565)    | 28.41 (21.63 to 35.32)    | 20 (15 to 22)    | 18 (13 to 28)    | -9.54 (-38.39 to 73.14)   | 755 (589 to 869)       | 592 (456 to 801)       | -21.63 (-40.46 to 23.39)  |
| Qatar               | 154 (123 to 187)          | 1446 (1178 to 1746)    | 838.58 (770.76 to 916.51) | 0 (0 to 1)       | 2 (1 to 3)       | 413.11 (169.07 to 853.64) | 41 (29 to 57)          | 296 (205 to 412)       | 628.10 (423.39 to 857.49) |
| Republic of Korea   | 17167 (15174 to 19498)    | 46956 (44197 to 49997) | 173.52 (147.67 to 206.09) | 313 (143 to 399) | 234 (183 to 313) | -25.35 (-46.63 to 58.97)  | 9498 (6903 to 11454)   | 10451 (7829 to 13343)  | 10.04 (-17.52 to 63.35)   |
| Republic of Moldova | 3098 (2561 to 3712)       | 3166 (2836 to 3521)    | 2.20 (-11.58 to 19.64)    | 17 (14 to 21)    | 18 (14 to 21)    | 4.75 (-16.20 to 31.59)    | 1046 (844 to 1266)     | 999 (820 to 1209)      | -4.45 (-18.23 to 13.33)   |

|                                  |                           |                           |                           |                   |                     |                          |                        |                        |                           |
|----------------------------------|---------------------------|---------------------------|---------------------------|-------------------|---------------------|--------------------------|------------------------|------------------------|---------------------------|
|                                  |                           |                           |                           |                   |                     |                          |                        |                        | 13.21)                    |
|                                  | 17947                     | 17043                     | -5.04                     |                   |                     |                          |                        |                        | -17.18                    |
| Romania                          | (15104 to 21254)          | (15232 to 19020)          | (-15.24 to 7.37)          | 64 (55 to 76)     | 74 (59 to 93)       | 15.86 (-8.37 to 45.57)   | 5269 (4206 to 6540)    | 4364 (3404 to 5459)    | (-29.98 to -2.13)         |
| Russian Federation               | 167371 (141580 to 195591) | 170565 (145182 to 199143) | 1.91 (-0.13 to 4.04)      | 977 (726 to 1128) | 1257 (1021 to 1464) | 28.65 (6.46 to 62.61)    | 53401 (41640 to 64977) | 56533 (46127 to 69324) | 5.86 (-5.94 to 23.29)     |
| Rwanda                           | 288 (237 to 355)          | 726 (584 to 888)          | 152.30 (132.10 to 172.65) | 34 (20 to 59)     | 42 (27 to 62)       | 21.96 (-36.82 to 143.44) | 1761 (735 to 3717)     | 1838 (1153 to 3012)    | 4.34 (-55.16 to 173.20)   |
| Saint Kitts and Nevis            | 10 (8 to 12)              | 21 (17 to 26)             | 106.61 (90.32 to 126.13)  | 1 (1 to 1)        | 1 (1 to 1)          | 9.71 (-25.03 to 72.10)   | 25 (19 to 29)          | 28 (19 to 41)          | 14.61 (-24.18 to 78.38)   |
| Saint Lucia                      | 25 (21 to 31)             | 59 (48 to 72)             | 131.09 (113.96 to 149.59) | 1 (1 to 1)        | 1 (1 to 2)          | 47.65 (10.86 to 116.72)  | 36 (29 to 41)          | 45 (36 to 56)          | 26.50 (-1.54 to 79.21)    |
| Saint Vincent and the Grenadines | 20 (16 to 24)             | 32 (26 to 39)             | 63.64 (48.19 to 80.82)    | 1 (1 to 1)        | 2 (1 to 2)          | 54.50 (13.27 to 112.91)  | 39 (32 to 45)          | 49 (40 to 62)          | 27.47 (-3.02 to 72.66)    |
| Samoa                            | 6 (5 to 8)                | 9 (7 to 10)               | 34.52 (23.82 to 45.98)    | 1 (1 to 1)        | 1 (1 to 1)          | 6.37 (-33.37 to 64.06)   | 31 (20 to 46)          | 30 (19 to 45)          | -1.06 (-42.04 to 65.39)   |
| San Marino                       | 29 (25 to 35)             | 48 (41 to 57)             | 65.44 (55.11 to 76.39)    | 0 (0 to 0)        | 0 (0 to 0)          | 167.91 (65.76 to 328.84) | 6 (4 to 8)             | 10 (8 to 14)           | 74.92 (47.44 to 111.54)   |
| Sao Tome and Principe            | 8 (6 to 10)               | 18 (15 to 23)             | 135.19 (118.79 to 152.91) | 0 (0 to 1)        | 0 (0 to 1)          | 3.87 (-41.14 to 89.85)   | 15 (8 to 24)           | 16 (11 to 24)          | 4.71 (-42.23 to 108.14)   |
| Saudi Arabia                     | 3748 (3112 to 4462)       | 13816 (11338 to 16751)    | 268.63 (237.42 to 301.72) | 12 (7 to 20)      | 27 (18 to 38)       | 131.24 (9.23 to 337.69)  | 1012 (729 to 1405)     | 3181 (2284 to 4376)    | 214.41 (119.36 to 315.14) |
| Senegal                          | 366 (298 to 449)          | 930 (756 to 1164)         | 153.93 (136.66 to 171.52) | 23 (10 to 37)     | 37 (22 to 57)       | 61.95 (2.65 to 184.83)   | 1084 (420 to 1912)     | 1527 (911 to 2378)     | 40.90 (-20.02 to 185.33)  |
| Serbia                           | 12769 (10737 to 14873)    | 16638 (14322 to 19211)    | 30.30 (20.12 to 43.95)    | 49 (37 to 78)     | 113 (74 to 147)     | 128.93 (9.06 to 259.34)  | 3314 (2528 to 4479)    | 4741 (3595 to 5996)    | 43.04 (-2.81 to 78.90)    |
| Seychelles                       | 3 (2 to 4)                | 6 (5 to 8)                | 117.31 (99.80 to 136.88)  | 0 (0 to 0)        | 0 (0 to 0)          | 28.62 (-7.02 to 75.47)   | 5 (4 to 7)             | 7 (5 to 9)             | 31.52 (-0.75 to 71.15)    |
| Sierra Leone                     | 181 (149 to 220)          | 467 (379 to 582)          | 158.32 (138.65 to 178.83) | 11 (4 to 19)      | 20 (10 to 32)       | 87.02 (3.04 to 331.6)    | 554 (164 to 1133)      | 981 (457 to 1656)      | 76.91 (-7.60 to 330.39)   |
| Singapore                        | 1615 (1305 to 1925)       | 3179 (2593 to 3765)       | 96.84 (78.98 to 114.70)   | 4 (3 to 4)        | 5 (4 to 8)          | 39.94 (6.12 to 63.76)    | 375 (279 to 471)       | 612 (427 to 797)       | 63.29 (34.14 to 92.44)    |

|                            |                        |                        |                           |                  |                  |                          |                       |                        |                          |
|----------------------------|------------------------|------------------------|---------------------------|------------------|------------------|--------------------------|-----------------------|------------------------|--------------------------|
|                            | to 1934)               | to 3962)               | to 116.81)                |                  |                  | to 150.34)               | 490)                  | 838)                   | to 100.87)               |
| Slovakia                   | 9361 (8373 to 10336)   | 10674 (9737 to 11684)  | 14.02 (8.30 to 20.14)     | 31 (25 to 48)    | 58 (41 to 76)    | 88.23 (-3.03 to 176.55)  | 2274 (1743 to 2989)   | 2856 (2175 to 3557)    | 25.60 (-5.11 to 53.77)   |
| Slovenia                   | 3775 (3318 to 4289)    | 4739 (4282 to 5219)    | 25.55 (17.98 to 33.07)    | 10 (8 to 13)     | 18 (13 to 25)    | 86.00 (28.56 to 165.93)  | 781 (579 to 1011)     | 977 (726 to 1253)      | 25.10 (7.66 to 43.50)    |
| Solomon Islands            | 8 (6 to 9)             | 17 (13 to 21)          | 124.02 (102.93 to 148.4)  | 1 (1 to 2)       | 2 (1 to 3)       | 64.34 (-3.76 to 176.72)  | 53 (24 to 101)        | 86 (48 to 156)         | 63.24 (-5.21 to 190.03)  |
| Somalia                    | 237 (190 to 293)       | 630 (502 to 786)       | 165.38 (145.60 to 187.38) | 19 (7 to 40)     | 40 (21 to 71)    | 109.57 (26.24 to 263.84) | 1021 (282 to 2543)    | 1986 (928 to 3988)     | 94.57 (2.46 to 316.32)   |
| South Africa               | 2945 (2438 to 3586)    | 6542 (5423 to 7934)    | 122.12 (114.01 to 131.25) | 98 (69 to 123)   | 166 (124 to 196) | 69.87 (20.49 to 168.66)  | 4862 (3068 to 7236)   | 6143 (4966 to 7083)    | 26.34 (-18.56 to 117.23) |
| South Sudan                | 249 (202 to 307)       | 469 (383 to 576)       | 88.39 (73.80 to 103.53)   | 22 (9 to 43)     | 29 (16 to 61)    | 29.68 (-39.27 to 148.37) | 1158 (325 to 2801)    | 1315 (637 to 2625)     | 13.58 (-53.56 to 178.43) |
| Spain                      | 39276 (37463 to 41127) | 77822 (74030 to 81685) | 98.14 (91.73 to 104.75)   | 278 (237 to 304) | 377 (303 to 600) | 35.79 (8.43 to 121.33)   | 11347 (9316 to 13673) | 17466 (13535 to 22106) | 53.93 (36.17 to 79.47)   |
| Sri Lanka                  | 909 (734 to 1119)      | 2295 (2003 to 2637)    | 152.54 (124.22 to 186.13) | 19 (14 to 24)    | 21 (15 to 30)    | 13.97 (-25.92 to 74.18)  | 813 (609 to 1032)     | 895 (684 to 1147)      | 10.11 (-20.92 to 51.47)  |
| Sudan                      | 3315 (2684 to 4060)    | 9292 (7568 to 11371)   | 180.28 (157.81 to 205.52) | 21 (10 to 44)    | 48 (28 to 78)    | 123.91 (3.53 to 380.84)  | 1310 (720 to 2866)    | 3003 (2102 to 4130)    | 129.31 (11.1 to 282.19)  |
| Suriname                   | 79 (66 to 96)          | 158 (129 to 194)       | 98.73 (81.35 to 117.62)   | 3 (2 to 3)       | 4 (3 to 5)       | 32.93 (-4.19 to 91.78)   | 118 (85 to 146)       | 138 (109 to 175)       | 16.97 (-14.68 to 66.50)  |
| Sweden                     | 30612 (26350 to 35136) | 40244 (34733 to 46000) | 31.46 (23.94 to 40.19)    | 107 (86 to 119)  | 95 (77 to 139)   | -11.38 (-27.36 to 46.41) | 6158 (4631 to 7936)   | 7117 (5148 to 9548)    | 15.58 (4.65 to 28.78)    |
| Switzerland                | 10695 (9668 to 11813)  | 14969 (13688 to 16325) | 39.96 (33.88 to 46.34)    | 73 (58 to 83)    | 123 (97 to 160)  | 69.01 (36.46 to 128.96)  | 2817 (2268 to 3429)   | 3807 (2979 to 4738)    | 35.16 (21.15 to 56.09)   |
| Syrian Arab Republic       | 2248 (1819 to 2734)    | 4862 (3940 to 5871)    | 116.26 (97.13 to 135.91)  | 23 (13 to 35)    | 37 (20 to 52)    | 57.25 (-10.52 to 184.61) | 1091 (741 to 1432)    | 1653 (1195 to 2195)    | 51.58 (7.71 to 137.88)   |
| Taiwan (Province of China) | 2221 (1923 to 2557)    | 9064 (8139 to 10153)   | 308.12 (279.81 to 342.19) | 101 (67 to 113)  | 199 (152 to 264) | 97.46 (44.81 to 288.02)  | 2623 (1919 to 2947)   | 4338 (3499 to 5416)    | 65.37 (31.64 to 167.25)  |
| Tajikistan                 | 2391 (1972 to 2877)    | 5519 (4623 to 6632)    | 130.78 (115.02 to 148.48) | 21 (11 to 34)    | 18 (13 to 26)    | -11.19 (-54.29 to 82.80) | 1691 (853 to 2831)    | 1646 (1219 to 2185)    | -2.66 (-48.60 to 91.67)  |



|                             |                           |                           |                           |                   |                     |                            |                        |                        |                            |
|-----------------------------|---------------------------|---------------------------|---------------------------|-------------------|---------------------|----------------------------|------------------------|------------------------|----------------------------|
| Thailand                    | 1734 (1327 to 2180)       | 3808 (3078 to 4630)       | 119.65 (96.59 to 151.17)  | 72 (52 to 95)     | 111 (80 to 149)     | 54.05 (-3.23 to 138.51)    | 2899 (2029 to 3946)    | 3272 (2453 to 4259)    | 12.87 (-26.29 to 71.96)    |
| Timor-Leste                 | 18 (14 to 23)             | 41 (33 to 50)             | 122.2 (104.08 to 146.48)  | 1 (1 to 3)        | 3 (2 to 5)          | 107.01 (24.75 to 246.34)   | 59 (29 to 102)         | 86 (48 to 138)         | 47.21 (-28.05 to 185.55)   |
| Togo                        | 190 (155 to 232)          | 514 (418 to 634)          | 170.07 (148.46 to 196.29) | 9 (4 to 14)       | 21 (14 to 30)       | 142.31 (33.33 to 393.01)   | 457 (182 to 773)       | 940 (589 to 1321)      | 105.73 (15.73 to 366.27)   |
| Tokelau                     | 0 (0 to 0)                | 0 (0 to 0)                | 17.45 (9.66 to 26.52)     | 0 (0 to 0)        | 0 (0 to 0)          | -38.14 (-61.51 to -1.52)   | 0 (0 to 1)             | 0 (0 to 0)             | -39.66 (-63.93 to 8.06)    |
| Tonga                       | 4 (3 to 5)                | 4 (4 to 5)                | 14.32 (5.18 to 25.01)     | 1 (0 to 1)        | 1 (0 to 1)          | 0.57 (-36.36 to 55.61)     | 21 (14 to 30)          | 19 (13 to 27)          | -11.27 (-43.54 to 36.78)   |
| Trinidad and Tobago         | 275 (226 to 333)          | 476 (395 to 586)          | 73.31 (60.64 to 88.40)    | 3 (2 to 4)        | 5 (4 to 7)          | 67.08 (17.69 to 135.28)    | 143 (110 to 169)       | 215 (162 to 279)       | 49.93 (17.59 to 92.29)     |
| Tunisia                     | 2247 (1845 to 2720)       | 5382 (4413 to 6568)       | 139.49 (122.55 to 159.3)  | 7 (5 to 11)       | 16 (11 to 23)       | 124.51 (18.63 to 312.49)   | 569 (405 to 784)       | 1215 (890 to 1622)     | 113.58 (59.27 to 174.73)   |
| Turkey                      | 24930 (21910 to 28012)    | 93902 (80596 to 107925)   | 276.67 (231.04 to 325.07) | 261 (159 to 401)  | 329 (250 to 471)    | 26.21 (-22.73 to 118.88)   | 13910 (9268 to 19352)  | 22488 (17253 to 28896) | 61.67 (9.74 to 147.01)     |
| Turkmenistan                | 1758 (1463 to 2085)       | 3806 (3155 to 4551)       | 116.48 (102.66 to 132.01) | 10 (7 to 13)      | 14 (9 to 20)        | 45.23 (9.53 to 98.88)      | 765 (493 to 1049)      | 1120 (805 to 1438)     | 46.38 (13.41 to 91.33)     |
| Tuvalu                      | 0 (0 to 0)                | 0 (0 to 1)                | 27.01 (14.84 to 39.84)    | 0 (0 to 0)        | 0 (0 to 0)          | -5.17 (-39.67 to 57.04)    | 3 (1 to 5)             | 2 (1 to 4)             | -16.57 (-50.42 to 58.50)   |
| Uganda                      | 569 (462 to 701)          | 1697 (1381 to 2111)       | 198.27 (178.98 to 220.89) | 48 (30 to 75)     | 102 (70 to 150)     | 114.15 (26.45 to 252.91)   | 2257 (1132 to 4612)    | 4600 (3084 to 7058)    | 103.84 (-2.52 to 318.38)   |
| Ukraine                     | 44470 (37197 to 53622)    | 42711 (36101 to 51042)    | -3.95 (-10.23 to 3.42)    | 230 (174 to 306)  | 260 (210 to 315)    | 12.61 (-17.79 to 52.12)    | 13419 (10673 to 16857) | 14197 (11469 to 17211) | 5.80 (-13.37 to 26.77)     |
| United Arab Emirates        | 595 (477 to 725)          | 5742 (4546 to 7126)       | 864.58 (768.02 to 978.3)  | 1 (1 to 3)        | 13 (7 to 22)        | 939.61 (312.54 to 2260.01) | 144 (93 to 219)        | 1401 (971 to 1965)     | 871.11 (531.13 to 1256.31) |
| United Kingdom              | 150003 (132531 to 168508) | 194529 (173985 to 215870) | 29.68 (26.73 to 33.13)    | 856 (756 to 1056) | 1793 (1533 to 1999) | 109.50 (62.60 to 132.89)   | 37500 (30121 to 46024) | 55171 (45323 to 66217) | 47.12 (29.39 to 55.47)     |
| United Republic of Tanzania | 1121 (914 to 1369)        | 2891 (2330 to 3566)       | 157.88 (138.98 to 177.80) | 86 (53 to 152)    | 181 (115 to 259)    | 111.26 (24.98 to 260.69)   | 4655 (2090 to 9955)    | 8565 (4988 to 14089)   | 83.97 (-7.81 to 290.41)    |

|                                    |                               |                              |                              |                     |                     |                             |                              |                              |                             |
|------------------------------------|-------------------------------|------------------------------|------------------------------|---------------------|---------------------|-----------------------------|------------------------------|------------------------------|-----------------------------|
| United States of America           | 982982<br>(846833 to 1129783) | 762890<br>(712357 to 813654) | -22.39<br>(-29.48 to -14.49) | 2171 (1940 to 2662) | 5910 (4622 to 6464) | 172.17<br>(80.73 to 199.18) | 186357<br>(137531 to 243644) | 215289<br>(175991 to 256059) | 15.53 (-1.97 to 33.87)      |
| United States Virgin Islands       | 32 (27 to 39)                 | 47 (39 to 58)                | 46.61 (32.66 to 61.87)       | 1 (0 to 1)          | 1 (1 to 1)          | 11.78<br>(-24.49 to 72.41)  | 26 (19 to 32)                | 23 (18 to 29)                | -9.33<br>(-33.27 to 25.88)  |
| Uruguay                            | 586 (485 to 711)              | 685 (564 to 830)             | 16.85 (7.20 to 26.83)        | 10 (9 to 14)        | 22 (19 to 26)       | 123.02<br>(68.94 to 165.97) | 339 (290 to 426)             | 572 (496 to 648)             | 68.83 (35.57 to 94.94)      |
| Uzbekistan                         | 10505 (8847 to 12563)         | 23340<br>(19452 to 27952)    | 122.19<br>(107.43 to 140.58) | 48 (31 to 59)       | 73 (58 to 93)       | 51.36 (12.53 to 153.54)     | 4299 (3006 to 5336)          | 6869 (5391 to 8500)          | 59.77 (27.87 to 109.54)     |
| Vanuatu                            | 4 (3 to 5)                    | 9 (7 to 11)                  | 115.45<br>(98.23 to 135.09)  | 1 (0 to 1)          | 2 (1 to 2)          | 77.85 (12.27 to 189.96)     | 33 (17 to 55)                | 57 (33 to 92)                | 71.58 (-1.00 to 187.82)     |
| Venezuela (Bolivarian Republic of) | 3817 (3268 to 4388)           | 8787 (7406 to 10382)         | 130.21<br>(113.08 to 147.54) | 28 (19 to 32)       | 44 (31 to 59)       | 58.23 (11.55 to 165.19)     | 1676 (1316 to 1993)          | 2642 (2032 to 3372)          | 57.61 (25.64 to 101.69)     |
| Viet Nam                           | 4754 (3636 to 5967)           | 20278<br>(16050 to 25063)    | 326.50<br>(284.54 to 376.20) | 221 (120 to 327)    | 177 (119 to 247)    | -19.57<br>(-57.9 to 40.02)  | 6650 (4129 to 8928)          | 7419 (5510 to 9604)          | 11.56<br>(-26.71 to 73.67)  |
| Yemen                              | 1826 (1464 to 2237)           | 6284 (5044 to 7734)          | 244.20<br>(216.72 to 270.66) | 14 (8 to 25)        | 44 (30 to 68)       | 217.58<br>(89.82 to 463.74) | 772 (495 to 1411)            | 2423 (1790 to 3248)          | 213.69<br>(96.39 to 365.86) |
| Zambia                             | 291 (236 to 350)              | 971 (790 to 1210)            | 233.83<br>(206.24 to 265.39) | 35 (18 to 64)       | 55 (38 to 76)       | 57.07<br>(-21.84 to 226.50) | 1941 (679 to 4527)           | 2548 (1621 to 3800)          | 31.27<br>(-46.88 to 283.23) |
| Zimbabwe                           | 524 (430 to 644)              | 931 (757 to 1165)            | 77.84 (65.57 to 91.40)       | 22 (16 to 31)       | 43 (25 to 65)       | 98.08 (13.90 to 202.61)     | 1018 (652 to 1728)           | 1888 (1075 to 2968)          | 85.39 (11.43 to 204.97)     |

Abbreviations: UI=uncertainty interval.

**Supplementary Table 3** Age-standardised prevalence, death and DALY rates for inflammatory bowel disease (IBD) by 204 countries or territories in 1990 and 2019, and their temporal trends from 1990 to 2019

| Characteristics     | Age-standardised prevalence rate |                           |                        | Age-standardized death rate |                     |                        | Age-standardized DALY rate |                        |                        |
|---------------------|----------------------------------|---------------------------|------------------------|-----------------------------|---------------------|------------------------|----------------------------|------------------------|------------------------|
|                     | per 100,000 population           |                           |                        | per 100,000 population      |                     |                        | per 100,000 population     |                        |                        |
|                     | 1990 No.<br>(95%UI)              | 2019 No.<br>(95%UI)       | EAPC No.<br>(95%CI)    | 1990 No.<br>(95%UI)         | 2019 No.<br>(95%UI) | EAPC No.<br>(95%CI)    | 1990 No.<br>(95%UI)        | 2019 No.<br>(95%UI)    | EAPC No.<br>(95%CI)    |
| Afghanistan         | 21.95 (17.75 to 26.86)           | 23.69 (19.05 to 29.24)    | 0.57 (0.40 to 0.74)    | 0.44 (0.22 to 0.78)         | 0.43 (0.26 to 0.64) | 0.01 (-0.06 to 0.08)   | 15.26 (8.26 to 26.64)      | 14.58 (9.58 to 20.47)  | 0.03 (-0.06 to 0.12)   |
| Albania             | 119.15 (100.27 to 140.7)         | 116.19 (97.53 to 136.91)  | 0.01 (-0.06 to 0.09)   | 1.65 (0.90 to 2.05)         | 0.41 (0.27 to 0.61) | -5.17 (-6.14 to -4.19) | 110.06 (47.30 to 143.55)   | 36.18 (25.65 to 49.28) | -4.07 (-5.01 to -3.12) |
| Algeria             | 34.69 (30.01 to 40.15)           | 39.54 (32.16 to 48.88)    | 0.68 (0.53 to 0.83)    | 0.25 (0.17 to 0.37)         | 0.17 (0.13 to 0.23) | -1.14 (-1.23 to -1.04) | 11.17 (8.26 to 15.40)      | 9.93 (7.45 to 12.97)   | -0.28 (-0.38 to -0.17) |
| American Samoa      | 6.24 (5.14 to 7.41)              | 6.14 (5.03 to 7.38)       | -0.22 (-0.35 to -0.09) | 1.54 (0.89 to 2.28)         | 0.53 (0.37 to 0.90) | -4.40 (-4.80 to -4.01) | 44.49 (26.51 to 63.51)     | 15.67 (10.89 to 28.11) | -4.23 (-4.59 to -3.86) |
| Andorra             | 108.82 (91.32 to 128.78)         | 112.31 (94.3 to 132.64)   | 0.17 (0.11 to 0.22)    | 0.70 (0.49 to 1.00)         | 0.69 (0.41 to 1.01) | 0.03 (-0.06 to 0.13)   | 29.98 (22.66 to 38.91)     | 29.68 (20.92 to 39.03) | 0.02 (-0.03 to 0.07)   |
| Angola              | 7.20 (5.93 to 9.02)              | 8.85 (7.31 to 10.88)      | 0.59 (0.48 to 0.71)    | 0.73 (0.43 to 1.16)         | 0.62 (0.45 to 0.89) | -0.60 (-0.66 to -0.54) | 23.37 (11.91 to 42.94)     | 18.19 (12.6 to 26.15)  | -0.89 (-0.95 to -0.83) |
| Antigua and Barbuda | 31.33 (26.25 to 37.78)           | 31.79 (26.42 to 38.6)     | 0.10 (0.04 to 0.16)    | 0.95 (0.70 to 1.12)         | 0.67 (0.53 to 0.91) | -1.77 (-2.08 to -1.46) | 31.60 (24.03 to 36.76)     | 22.35 (17.9 to 28.99)  | -1.66 (-1.90 to -1.42) |
| Argentina           | 15.07 (12.24 to 17.99)           | 15.98 (13.09 to 19.42)    | 0.21 (0.19 to 0.23)    | 0.27 (0.24 to 0.30)         | 0.27 (0.23 to 0.31) | -0.10 (-0.25 to 0.04)  | 9.25 (8.00 to 10.66)       | 9.02 (7.72 to 10.63)   | -0.13 (-0.22 to -0.05) |
| Armenia             | 81.15 (67.51 to 95.76)           | 86.67 (72.86 to 104.56)   | 0.29 (0.26 to 0.32)    | 0.25 (0.19 to 0.30)         | 0.28 (0.21 to 0.34) | 0.72 (0.36 to 1.09)    | 19.99 (15.55 to 25.21)     | 20.5 (15.81 to 26.35)  | 0.20 (0.05 to 0.36)    |
| Australia           | 98.73 (82.47 to 116.23)          | 154.35 (134.91 to 175.51) | 1.00 (0.72 to 1.27)    | 0.54 (0.47 to 0.66)         | 0.78 (0.56 to 0.91) | 2.23 (1.81 to 2.66)    | 24.61 (19.22 to 31.12)     | 35.58 (27.28 to 45.33) | 1.20 (0.98 to 1.41)    |
| Austria             | 277.06 (243.01 to 307.67)        | 291.88 (260.14 to 327.43) | 0.19 (-0.09 to 0.46)   | 0.87 (0.77 to 1.13)         | 0.52 (0.43 to 0.81) | -1.59 (-2.15 to -1.03) | 61.71 (48.41 to 77.45)     | 54.31 (39.35 to 71.37) | -0.39 (-0.65 to -0.12) |
| Azerbaijan          | 76.23 (63.23 to 90.47)           | 81.93 (68.62 to 99.02)    | 0.35 (0.20 to 0.49)    | 0.22 (0.16 to 0.28)         | 0.16 (0.11 to 0.23) | -1.09 (-1.19 to -1.00) | 17.65 (13.27 to 23.02)     | 16.2 (11.65 to 21.65)  | -0.36 (-0.44 to -0.27) |
| Bahamas             | 32.77 (27.60 to 39.08)           | 28.72 (23.64 to 35.44)    | -0.27 (-0.39 to -0.15) | 0.59 (0.50 to 0.68)         | 0.49 (0.39 to 0.62) | -0.66 (-0.78 to -0.53) | 23.15 (19.78 to 26.78)     | 19.04 (15.33 to 23.86) | -0.72 (-0.81 to -0.63) |
| Bahrain             | 42.17 (36.27 to 48.42)           | 44.05 (36.4 to 53.11)     | 0.35 (0.18 to 0.51)    | 0.26 (0.20 to 0.33)         | 0.17 (0.13 to 0.22) | -1.34 (-1.69 to -0.99) | 11.98 (9.36 to 15.18)      | 10.05 (7.4 to 13.28)   | -0.53 (-0.63 to -0.43) |
| Bangladesh          | 17.19 (13.90 to 21.66)           | 21.62 (17.31 to 27)       | 0.65 (0.53 to 0.77)    | 1.00 (0.64 to 1.64)         | 0.56 (0.35 to 0.83) | -2.14 (-2.39 to -1.89) | 31.40 (20.47 to 45.16)     | 18.1 (12.11 to 25.27)  | -2.03 (-2.15 to -1.92) |
| Barbados            | 70.62 (59.14 to 84.46)           | 69.57 (58.9 to 83.59)     | 0.04 (-0.02 to 0.09)   | 0.42 (0.36 to 0.48)         | 0.38 (0.30 to 0.48) | -0.41 (-0.57 to -0.25) | 22.21 (18.13 to 27.15)     | 20.02 (15.56 to 25.32) | -0.42 (-0.48 to -0.36) |
| Belarus             | 82.25 (69.99 to 94.71)           | 87.85 (73.61 to 102.09)   | 0.38 (0.27 to 0.49)    | 0.36 (0.26 to 0.46)         | 0.38 (0.28 to 0.48) | 0.24 (0.09 to 0.39)    | 22.33 (16.76 to 27.90)     | 23.25 (17.89 to 28.61) | 0.17 (0.09 to 0.25)    |

|                                  |                           |                           |                        |                     |                     |                        |                        |                        |                        |
|----------------------------------|---------------------------|---------------------------|------------------------|---------------------|---------------------|------------------------|------------------------|------------------------|------------------------|
|                                  | to 96.97)                 | to 104.11)                | 0.48)                  | 0.48)               | 0.50)               | 0.39)                  | to 28.89)              | to 29.87)              | 0.25)                  |
| Belgium                          | 83.42 (76.75 to 90.48)    | 143.07 (123.44 to 164.68) | 1.68 (1.42 to 1.94)    | 0.76 (0.67 to 0.90) | 0.97 (0.76 to 1.12) | 0.24 (-0.90 to 1.40)   | 25.98 (21.36 to 31.07) | 36.56 (28.88 to 45.93) | 0.82 (0.35 to 1.28)    |
| Belize                           | 22.80 (18.88 to 28.09)    | 24.31 (20.10 to 29.68)    | 0.35 (0.25 to 0.45)    | 0.70 (0.48 to 0.90) | 0.61 (0.50 to 0.80) | -1.14 (-1.52 to -0.76) | 26.21 (19.11 to 32.42) | 21.80 (18.03 to 27.26) | -1.22 (-1.49 to -0.95) |
| Benin                            | 7.48 (6.20 to 9.10)       | 8.88 (7.27 to 10.87)      | 0.58 (0.47 to 0.69)    | 0.48 (0.26 to 0.86) | 0.45 (0.30 to 0.65) | -0.42 (-0.64 to -0.20) | 17.20 (8.03 to 28.30)  | 15.67 (9.98 to 22.61)  | -0.50 (-0.70 to -0.30) |
| Bermuda                          | 34.26 (28.75 to 41.82)    | 34.27 (28.46 to 40.73)    | 0.17 (0.09 to 0.25)    | 0.89 (0.66 to 1.08) | 0.36 (0.28 to 0.50) | -3.73 (-4.07 to -3.40) | 28.26 (22.38 to 33.89) | 14.3 (11.3 to 18.41)   | -2.73 (-3.00 to -2.46) |
| Bhutan                           | 16.74 (13.31 to 21.03)    | 22.23 (18.11 to 27.62)    | 1.24 (1.11 to 1.38)    | 0.68 (0.35 to 1.53) | 0.55 (0.34 to 1.23) | -0.84 (-0.97 to -0.72) | 21.23 (11.26 to 43.14) | 15.82 (10.39 to 31.52) | -1.18 (-1.27 to -1.10) |
| Bolivia (Plurinational State of) | 13.46 (11.31 to 16.36)    | 13.54 (11.36 to 16.33)    | 0.05 (0.00 to 0.10)    | 0.50 (0.27 to 0.79) | 0.40 (0.30 to 0.52) | -0.83 (-0.91 to -0.75) | 22.17 (10.30 to 41.41) | 12.73 (9.53 to 16.38)  | -2.04 (-2.15 to -1.94) |
| Bosnia and Herzegovina           | 102.41 (88.37 to 118.99)  | 122.38 (107.08 to 140.67) | 0.58 (0.55 to 0.61)    | 0.46 (0.33 to 0.58) | 0.45 (0.23 to 0.61) | -0.20 (-0.52 to 0.12)  | 27.68 (21.43 to 35.18) | 29.74 (21.21 to 38.84) | 0.14 (-0.01 to 0.28)   |
| Botswana                         | 8.58 (7.14 to 10.52)      | 10.89 (8.88 to 13.6)      | 0.60 (0.44 to 0.76)    | 0.70 (0.48 to 1.00) | 0.64 (0.43 to 0.89) | -0.77 (-1.15 to -0.39) | 20.94 (14.53 to 29.34) | 20.3 (13.14 to 30.81)  | -0.41 (-0.71 to -0.11) |
| Brazil                           | 65.87 (57.91 to 74.92)    | 47.78 (41.6 to 54.51)     | -0.87 (-1.09 to -0.65) | 0.48 (0.42 to 0.52) | 0.45 (0.41 to 0.52) | 0.01 (-0.16 to 0.19)   | 23.70 (20.23 to 27.67) | 19.51 (16.72 to 22.74) | -0.44 (-0.62 to -0.27) |
| Brunei Darussalam                | 53.76 (43.58 to 66.16)    | 57.28 (46.33 to 70.04)    | 0.25 (0.24 to 0.27)    | 1.52 (1.08 to 2.01) | 1.48 (0.97 to 1.89) | 0.09 (-0.02 to 0.20)   | 36.51 (27.84 to 47.59) | 32.76 (26.62 to 39.71) | -0.25 (-0.33 to -0.18) |
| Bulgaria                         | 127.47 (108.71 to 149.68) | 120.16 (101.94 to 142.65) | -0.16 (-0.29 to -0.03) | 0.26 (0.23 to 0.31) | 0.33 (0.25 to 0.41) | 1.13 (0.73 to 1.54)    | 28.31 (21.41 to 36.54) | 27.62 (20.56 to 35.57) | 0.00 (-0.21 to 0.21)   |
| Burkina Faso                     | 6.79 (5.57 to 8.47)       | 7.81 (6.46 to 9.56)       | 0.59 (0.41 to 0.77)    | 0.61 (0.37 to 0.89) | 0.67 (0.38 to 1.00) | 0.56 (0.28 to 0.85)    | 21.41 (10.66 to 33.67) | 22.52 (12.05 to 34.80) | 0.38 (0.15 to 0.62)    |
| Burundi                          | 6.12 (5.03 to 7.50)       | 6.13 (5.06 to 7.50)       | -0.09 (-0.19 to 0.01)  | 0.69 (0.45 to 1.02) | 0.73 (0.46 to 1.16) | 0.15 (-0.07 to 0.37)   | 22.15 (14.22 to 36.56) | 20.85 (13.56 to 32.18) | -0.20 (-0.42 to 0.03)  |
| Cabo Verde                       | 10.12 (8.33 to 12.38)     | 12.18 (9.88 to 14.93)     | 0.76 (0.65 to 0.88)    | 0.33 (0.20 to 0.46) | 0.25 (0.19 to 0.33) | -2.05 (-2.56 to -1.54) | 12.86 (8.37 to 17.33)  | 8.69 (6.98 to 10.77)   | -2.12 (-2.50 to -1.74) |
| Cambodia                         | 3.02 (2.34 to 3.74)       | 3.77 (3.01 to 4.61)       | 0.65 (0.57 to 0.72)    | 0.50 (0.27 to 0.71) | 0.35 (0.23 to 0.45) | -1.44 (-1.54 to -1.34) | 14.51 (8.27 to 21.45)  | 8.98 (6.42 to 11.33)   | -1.86 (-1.96 to -1.77) |
| Cameroon                         | 8.34 (6.88 to 10.38)      | 10.13 (8.33 to 12.46)     | 0.79 (0.68 to 0.90)    | 0.54 (0.29 to 0.88) | 0.38 (0.21 to 0.59) | -1.69 (-1.94 to -1.43) | 18.12 (9.17 to 27.57)  | 13.36 (7.77 to 21.03)  | -1.43 (-1.66 to -1.20) |
| Canada                           | 382.53 (367.54 to 397.57) | 357.73 (323.05 to 393.88) | 0.13 (-0.03 to 0.28)   | 0.87 (0.77 to 0.97) | 0.56 (0.46 to 0.82) | -2.43 (-3.11 to -1.75) | 74.34 (56.49 to 95.45) | 64.91 (46.59 to 85.11) | -0.31 (-0.41 to -0.21) |
| Central African Republic         | 6.56 (5.39 to 8.20)       | 6.92 (5.75 to 8.49)       | 0.16 (0.14 to 0.18)    | 0.86 (0.55 to 1.38) | 0.86 (0.53 to 1.36) | 0.02 (-0.06 to 0.10)   | 26.29 (16.24 to 42.90) | 25.47 (14.87 to 41.50) | -0.07 (-0.13 to 0.00)  |
| Chad                             | 6.92 (5.73 to 8.53)       | 8.10 (6.65 to 9.90)       | 0.68 (0.57 to 0.80)    | 0.58 (0.32 to 0.98) | 0.58 (0.39 to 0.84) | -0.24 (-0.45 to -0.04) | 20.08 (9.86 to 32.61)  | 19.16 (11.97 to 27.44) | -0.36 (-0.55 to -0.16) |

|                                       |                           |                           |                        |                     |                     |                        |                        |                        |                        |
|---------------------------------------|---------------------------|---------------------------|------------------------|---------------------|---------------------|------------------------|------------------------|------------------------|------------------------|
| Chile                                 | 30.30 (25.82 to 35.36)    | 31.66 (27.25 to 36.7)     | 0.29 (-0.09 to 0.67)   | 0.46 (0.37 to 0.51) | 0.30 (0.26 to 0.38) | -1.75 (-2.10 to -1.40) | 16.52 (13.59 to 19.03) | 11.96 (9.91 to 14.48)  | -1.10 (-1.28 to -0.91) |
| China                                 | 22.85 (18.98 to 27.15)    | 47.06 (40.05 to 54.99)    | 2.80 (2.41 to 3.19)    | 0.86 (0.59 to 1.16) | 0.30 (0.24 to 0.35) | -4.11 (-4.50 to -3.71) | 24.47 (17.88 to 30.19) | 13.1 (10.29 to 16.31)  | -2.36 (-2.54 to -2.18) |
| Colombia                              | 29.55 (24.81 to 34.95)    | 29.36 (24.89 to 34.88)    | -0.04 (-0.07 to -0.01) | 0.28 (0.25 to 0.31) | 0.29 (0.22 to 0.38) | 0.75 (0.38 to 1.12)    | 12.89 (10.91 to 15.21) | 12.53 (9.75 to 15.57)  | 0.36 (0.12 to 0.60)    |
| Comoros                               | 7.33 (6.01 to 9.00)       | 7.78 (6.38 to 9.69)       | 0.36 (0.24 to 0.48)    | 0.83 (0.43 to 1.44) | 0.75 (0.48 to 1.19) | -0.51 (-0.67 to -0.36) | 23.44 (10.67 to 39.49) | 20.58 (13.10 to 30.54) | -0.63 (-0.84 to -0.41) |
| Congo                                 | 9.67 (7.93 to 11.87)      | 10.38 (8.57 to 12.74)     | 0.30 (0.16 to 0.45)    | 0.79 (0.56 to 1.16) | 0.66 (0.47 to 0.93) | -0.58 (-0.75 to -0.41) | 23.58 (16.35 to 34.61) | 18.36 (13.15 to 25.90) | -0.82 (-0.99 to -0.66) |
| Cook Islands                          | 6.37 (5.18 to 7.65)       | 6.17 (5.09 to 7.51)       | -0.21 (-0.35 to -0.06) | 1.64 (1.17 to 2.20) | 0.81 (0.53 to 1.11) | -2.70 (-2.90 to -2.50) | 50.74 (35.37 to 72.08) | 24.94 (15.58 to 36.18) | -2.70 (-2.88 to -2.51) |
| Costa Rica                            | 30.77 (25.88 to 36.60)    | 31.40 (26.47 to 37.15)    | 0.04 (0.03 to 0.05)    | 0.14 (0.12 to 0.16) | 0.20 (0.14 to 0.26) | 1.04 (0.82 to 1.26)    | 8.60 (6.81 to 10.81)   | 10.14 (7.74 to 12.91)  | 0.58 (0.47 to 0.69)    |
| Côte d'Ivoire                         | 8.08 (6.58 to 9.97)       | 8.70 (7.15 to 10.96)      | 0.43 (0.34 to 0.52)    | 0.46 (0.23 to 0.80) | 0.40 (0.26 to 0.58) | -0.71 (-0.97 to -0.45) | 15.45 (7.59 to 24.88)  | 13.59 (8.56 to 19.48)  | -0.63 (-0.86 to -0.40) |
| Croatia                               | 166.42 (155.48 to 178.41) | 203.79 (188.71 to 220.14) | 0.64 (0.57 to 0.70)    | 0.28 (0.24 to 0.42) | 0.41 (0.30 to 0.52) | 1.79 (1.42 to 2.17)    | 33.08 (24.90 to 42.82) | 41.30 (30.43 to 53.17) | 0.79 (0.65 to 0.93)    |
| Cuba                                  | 30.31 (25.30 to 36.52)    | 29.25 (23.94 to 35.26)    | -0.01 (-0.07 to 0.06)  | 0.35 (0.23 to 0.42) | 0.23 (0.18 to 0.29) | -2.04 (-2.48 to -1.60) | 14.22 (10.70 to 16.97) | 10.45 (8.37 to 12.94)  | -1.38 (-1.64 to -1.12) |
| Cyprus                                | 42.09 (35.82 to 49.01)    | 58.44 (53.02 to 63.85)    | 0.98 (0.85 to 1.11)    | 2.09 (1.24 to 3.02) | 1.00 (0.76 to 1.32) | -3.13 (-3.45 to -2.81) | 36.43 (25.10 to 47.83) | 22.06 (17.95 to 26.41) | -2.26 (-2.48 to -2.03) |
| Czechia                               | 85.23 (71.89 to 102.44)   | 152.02 (139.69 to 164.49) | 1.52 (1.33 to 1.71)    | 0.54 (0.49 to 0.63) | 0.56 (0.42 to 0.69) | 0.80 (0.45 to 1.15)    | 26.65 (21.98 to 32.43) | 35.40 (27.15 to 44.74) | 0.98 (0.90 to 1.06)    |
| Democratic People's Republic of Korea | 15.93 (13.23 to 19.03)    | 15.61 (12.96 to 18.71)    | -0.13 (-0.21 to -0.06) | 0.57 (0.33 to 0.82) | 0.41 (0.28 to 0.59) | -1.10 (-1.20 to -1.00) | 17.24 (9.70 to 27.63)  | 11.10 (8.17 to 14.58)  | -1.31 (-1.41 to -1.21) |
| Democratic Republic of the Congo      | 8.50 (6.93 to 10.44)      | 7.80 (6.41 to 9.73)       | -0.45 (-0.71 to -0.20) | 0.71 (0.50 to 1.02) | 0.57 (0.40 to 0.82) | -0.78 (-0.91 to -0.64) | 21.69 (14.31 to 32.28) | 17.22 (12.20 to 24.09) | -0.82 (-0.97 to -0.66) |
| Denmark                               | 232.13 (210.74 to 255.89) | 227.82 (208.42 to 250.75) | 0.47 (0.29 to 0.65)    | 0.53 (0.48 to 0.62) | 0.59 (0.50 to 0.68) | 0.01 (-0.61 to 0.63)   | 46.68 (35.05 to 59.60) | 45.17 (34.12 to 58.06) | 0.13 (-0.02 to 0.29)   |
| Djibouti                              | 7.12 (5.93 to 8.73)       | 9.07 (7.45 to 11.07)      | 1.24 (1.04 to 1.45)    | 0.60 (0.37 to 1.07) | 0.54 (0.36 to 0.89) | -0.56 (-0.67 to -0.45) | 18.05 (10.87 to 32.37) | 15.83 (10.31 to 24.84) | -0.67 (-0.82 to -0.53) |
| Dominica                              | 29.23 (24.60 to 35.45)    | 27.29 (22.61 to 33.47)    | -0.12 (-0.18 to -0.07) | 1.01 (0.79 to 1.23) | 0.76 (0.57 to 1.02) | -1.20 (-1.28 to -1.12) | 34.22 (27.47 to 41.24) | 26 (20.19 to 34.33)    | -1.17 (-1.27 to -1.07) |
| Dominican Republic                    | 25.16 (20.80 to 30.54)    | 24.19 (19.90 to 29.50)    | 0.16 (0.01 to 0.32)    | 0.24 (0.19 to 0.31) | 0.24 (0.17 to 0.32) | 0.09 (-0.13 to 0.32)   | 12.08 (9.46 to 15.94)  | 10.73 (7.96 to 13.99)  | -0.27 (-0.50 to -0.04) |
| Ecuador                               | 17.02 (15.04 to 19.21)    | 19.97 (17.98 to 22.11)    | 0.49 (0.39 to 0.59)    | 0.23 (0.18 to 0.31) | 0.23 (0.17 to 0.30) | 0.55 (-0.03 to 1.13)   | 10.90 (8.22 to 13.94)  | 9.02 (6.84 to 11.09)   | -0.33 (-0.74 to 0.08)  |

|                   |                           |                           |                        |                     |                     |                        |                        |                        |                        |
|-------------------|---------------------------|---------------------------|------------------------|---------------------|---------------------|------------------------|------------------------|------------------------|------------------------|
| Egypt             | 39.84 (33.94 to 46.00)    | 44.48 (36.34 to 55.00)    | 0.26 (0.20 to 0.32)    | 0.22 (0.13 to 0.47) | 0.21 (0.12 to 0.35) | 0.32 (0.07 to 0.56)    | 11.25 (7.91 to 16.51)  | 11.49 (8.21 to 15.51)  | 0.19 (0.10 to 0.27)    |
| El Salvador       | 23.89 (19.87 to 28.45)    | 24.71 (20.64 to 29.14)    | 0.12 (0.05 to 0.19)    | 0.36 (0.23 to 0.45) | 0.14 (0.11 to 0.20) | -3.87 (-4.22 to -3.52) | 15.07 (11.16 to 18.78) | 7.25 (5.45 to 9.54)    | -2.87 (-3.18 to -2.56) |
| Equatorial Guinea | 7.11 (5.84 to 8.80)       | 10.89 (9.04 to 13.36)     | 1.66 (1.48 to 1.85)    | 0.76 (0.44 to 1.28) | 0.54 (0.33 to 0.86) | -1.45 (-1.60 to -1.30) | 23.13 (13.07 to 37.98) | 14.77 (9.26 to 22.66)  | -1.89 (-2.04 to -1.73) |
| Eritrea           | 6.35 (5.28 to 7.85)       | 6.98 (5.79 to 8.43)       | 0.26 (0.21 to 0.32)    | 0.61 (0.39 to 0.96) | 0.77 (0.52 to 1.12) | 0.71 (0.52 to 0.89)    | 20.05 (11.19 to 34.57) | 22.27 (15.26 to 32.30) | 0.34 (0.20 to 0.49)    |
| Estonia           | 71.59 (62.77 to 81.41)    | 103.71 (90.72 to 118.15)  | 1.12 (0.91 to 1.32)    | 0.55 (0.46 to 0.61) | 0.34 (0.26 to 0.47) | -2.35 (-2.68 to -2.02) | 28.55 (23.60 to 33.59) | 24.50 (18.49 to 31.62) | -1.07 (-1.32 to -0.81) |
| Eswatini          | 8.30 (6.84 to 10.21)      | 9.49 (7.76 to 11.68)      | 0.49 (0.39 to 0.58)    | 0.55 (0.33 to 0.83) | 0.60 (0.42 to 0.83) | 0.53 (0.14 to 0.91)    | 17.33 (9.97 to 26.06)  | 17.93 (12.43 to 25.37) | 0.38 (0.14 to 0.63)    |
| Ethiopia          | 5.88 (4.90 to 7.15)       | 6.78 (5.64 to 8.29)       | 0.53 (0.48 to 0.59)    | 0.84 (0.59 to 1.34) | 0.72 (0.42 to 1.07) | -0.67 (-0.82 to -0.52) | 26.74 (17.05 to 45.16) | 19.04 (11.93 to 28.10) | -1.33 (-1.48 to -1.18) |
| Fiji              | 4.78 (3.90 to 5.75)       | 4.70 (3.85 to 5.71)       | -0.12 (-0.34 to 0.09)  | 0.35 (0.26 to 0.45) | 0.26 (0.19 to 0.34) | -1.16 (-1.28 to -1.03) | 10.67 (8.31 to 13.70)  | 8.17 (5.94 to 10.77)   | -1.08 (-1.21 to -0.95) |
| Finland           | 162.00 (150.44 to 173.8)  | 286.76 (256.44 to 318.38) | 1.86 (1.78 to 1.94)    | 0.47 (0.35 to 0.55) | 0.29 (0.25 to 0.34) | -2.22 (-2.47 to -1.96) | 33.34 (25.19 to 43.04) | 47.57 (33.68 to 63.99) | 1.06 (0.98 to 1.14)    |
| France            | 96.03 (87.62 to 104.59)   | 136.71 (123.31 to 151.14) | 1.43 (1.34 to 1.53)    | 1.08 (0.93 to 1.20) | 1.21 (0.73 to 1.42) | 0.74 (0.46 to 1.02)    | 31.92 (26.78 to 37.48) | 39.44 (31.13 to 48.47) | 1.07 (0.94 to 1.20)    |
| Gabon             | 9.49 (7.90 to 11.62)      | 11.27 (9.27 to 13.92)     | 0.53 (0.51 to 0.56)    | 0.61 (0.41 to 0.96) | 0.53 (0.38 to 0.76) | -0.49 (-0.70 to -0.28) | 18.69 (12.11 to 28.60) | 15.27 (10.62 to 21.51) | -0.71 (-0.88 to -0.54) |
| Gambia            | 8.70 (7.11 to 10.56)      | 8.81 (7.23 to 10.96)      | -0.10 (-0.21 to 0.01)  | 0.58 (0.34 to 0.92) | 0.44 (0.29 to 0.60) | -1.52 (-1.81 to -1.24) | 19.12 (10.73 to 31.19) | 14.25 (9.59 to 19.10)  | -1.56 (-1.85 to -1.28) |
| Georgia           | 84.45 (71.53 to 99.72)    | 87.97 (73.75 to 104.83)   | 0.15 (0.08 to 0.22)    | 0.29 (0.18 to 0.39) | 0.29 (0.19 to 0.37) | 0.18 (-1.12 to 1.50)   | 20.37 (15.24 to 26.41) | 20.25 (15.35 to 26.28) | 0.02 (-0.38 to 0.41)   |
| Germany           | 104.26 (89.74 to 121.91)  | 214.93 (188.62 to 243.64) | 1.09 (0.54 to 1.64)    | 0.96 (0.79 to 1.60) | 1.94 (1.46 to 2.20) | 3.73 (3.26 to 4.20)    | 35.51 (28.44 to 47.28) | 64.06 (51.49 to 77.71) | 1.80 (1.57 to 2.02)    |
| Ghana             | 10.54 (8.69 to 12.71)     | 12.26 (10.11 to 14.88)    | 0.73 (0.63 to 0.83)    | 0.70 (0.35 to 1.24) | 0.55 (0.31 to 0.82) | -0.97 (-1.23 to -0.70) | 24.11 (11.81 to 39.44) | 18.5 (10.85 to 26.95)  | -1.02 (-1.27 to -0.77) |
| Greece            | 97.92 (82.43 to 113.83)   | 78.66 (70.88 to 87.04)    | -0.98 (-1.20 to -0.75) | 0.26 (0.22 to 0.30) | 0.23 (0.19 to 0.27) | -0.36 (-0.92 to 0.20)  | 19.2 (14.17 to 25.49)  | 15.88 (11.92 to 20.55) | -0.78 (-0.85 to -0.71) |
| Greenland         | 144.67 (122.01 to 170.01) | 163.39 (138.74 to 188.49) | 0.34 (0.27 to 0.40)    | 0.57 (0.45 to 0.71) | 0.74 (0.38 to 0.96) | 1.07 (0.80 to 1.34)    | 34.12 (26.01 to 44.17) | 38.3 (28.36 to 50.15)  | 0.36 (0.24 to 0.47)    |
| Grenada           | 24.13 (19.74 to 29.02)    | 24.31 (20.03 to 30.13)    | 0.03 (-0.05 to 0.12)   | 1.34 (1.06 to 1.62) | 1.24 (1.03 to 1.52) | -0.55 (-0.68 to -0.41) | 44.27 (36.58 to 52.74) | 38.43 (32.58 to 46.61) | -0.64 (-0.73 to -0.56) |
| Guam              | 6.83 (5.65 to 8.11)       | 6.54 (5.35 to 7.82)       | -0.18 (-0.35 to -0.01) | 0.33 (0.26 to 0.42) | 0.16 (0.12 to 0.23) | -3.00 (-3.55 to -2.45) | 9.01 (7.19 to 11.32)   | 5.39 (4.11 to 7.68)    | -2.12 (-2.65 to -1.59) |
| Guatemala         | 21.60 (18.10 to 25.10)    | 23.54 (19.84 to 27.24)    | 0.29 (0.25 to 0.33)    | 0.25 (0.18 to 0.32) | 0.29 (0.22 to 0.36) | 1.32 (0.72 to 1.92)    | 11.81 (8.36 to 15.26)  | 11.99 (9.52 to 14.46)  | 0.71 (0.18 to 1.24)    |

|                            |                           |                           |                        |                     |                     |                        |                        |                        |                        |       |
|----------------------------|---------------------------|---------------------------|------------------------|---------------------|---------------------|------------------------|------------------------|------------------------|------------------------|-------|
|                            |                           | to 26.13)                 | to 28.11)              | 0.32)               | 0.38)               | 0.37)                  | 1.92)                  | to 18.2)               | to 14.91)              | 1.24) |
| Guinea                     | 7.53 (6.18 to 9.35)       | 8.61 (7.06 to 10.53)      | 0.61 (0.49 to 0.74)    | 0.43 (0.18 to 0.86) | 0.40 (0.21 to 0.60) | -0.36 (-0.50 to -0.22) | 16.9 (6.31 to 29.14)   | 14.41 (7.36 to 21.95)  | -0.58 (-0.70 to -0.47) |       |
| Guinea-Bissau              | 7.32 (5.99 to 9.06)       | 8.43 (6.92 to 10.32)      | 0.63 (0.50 to 0.76)    | 0.75 (0.36 to 1.18) | 0.61 (0.4 to 0.85)  | -0.81 (-0.93 to -0.68) | 26.39 (11.34 to 44.49) | 20.54 (12.76 to 28.9)  | -0.94 (-1.07 to -0.80) |       |
| Guyana                     | 23.56 (19.43 to 28.53)    | 22.95 (18.93 to 28.26)    | 0.06 (-0.03 to 0.15)   | 1.19 (0.97 to 1.41) | 1.02 (0.76 to 1.33) | -0.53 (-0.70 to -0.35) | 40.69 (32.87 to 48.37) | 35.43 (26.51 to 46.07) | -0.46 (-0.59 to -0.32) |       |
| Haiti                      | 20.11 (16.54 to 24.88)    | 19.43 (16.14 to 24.31)    | 0.07 (-0.03 to 0.17)   | 1.41 (0.74 to 2.12) | 1.08 (0.61 to 1.59) | -0.77 (-0.89 to -0.65) | 52.02 (22.41 to 92.43) | 36.86 (19.94 to 54.22) | -0.94 (-1.12 to -0.77) |       |
| Honduras                   | 22.83 (18.97 to 27.11)    | 23.93 (19.84 to 28.49)    | 0.18 (0.14 to 0.23)    | 0.72 (0.46 to 0.99) | 0.83 (0.51 to 1.15) | 0.87 (0.73 to 1.02)    | 28.54 (19.06 to 38.67) | 24.37 (15.88 to 32.67) | -0.38 (-0.43 to -0.32) |       |
| Hungary                    | 199.20 (181.71 to 219.68) | 332.82 (309.79 to 356.72) | 2.13 (1.78 to 2.48)    | 0.64 (0.58 to 0.82) | 0.56 (0.45 to 0.71) | -0.62 (-1.04 to -0.20) | 48.33 (38.31 to 59.55) | 64.34 (47.69 to 82.55) | 1.15 (0.85 to 1.46)    |       |
| Iceland                    | 136.42 (115.41 to 161.21) | 210.18 (180.43 to 243.51) | 0.84 (0.59 to 1.09)    | 0.67 (0.57 to 0.78) | 0.65 (0.51 to 0.75) | 0.14 (-0.01 to 0.29)   | 33.49 (26.34 to 42.36) | 42.38 (31.83 to 54.83) | 0.47 (0.33 to 0.62)    |       |
| India                      | 20.68 (16.76 to 25.67)    | 20.34 (16.57 to 24.97)    | 0.18 (-0.03 to 0.38)   | 0.63 (0.43 to 0.91) | 0.40 (0.29 to 0.53) | -1.93 (-2.11 to -1.74) | 20.11 (13.58 to 26.72) | 13.04 (9.44 to 16.5)   | -1.73 (-1.86 to -1.61) |       |
| Indonesia                  | 3.37 (2.70 to 4.07)       | 4.16 (3.37 to 5.00)       | 0.74 (0.60 to 0.88)    | 0.77 (0.37 to 1.04) | 0.55 (0.33 to 0.70) | -1.42 (-1.56 to -1.29) | 19.48 (11.70 to 24.6)  | 11.66 (8.16 to 14.98)  | -2.04 (-2.17 to -1.91) |       |
| Iran (Islamic Republic of) | 41.07 (33.51 to 50.84)    | 44.80 (36.70 to 55.07)    | 0.29 (0.02 to 0.57)    | 0.22 (0.12 to 0.34) | 0.19 (0.08 to 0.24) | -0.11 (-0.64 to 0.42)  | 11.09 (8.34 to 14.22)  | 11.03 (7.60 to 14.22)  | 0.12 (-0.02 to 0.25)   |       |
| Iraq                       | 19.71 (16.52 to 23.39)    | 28.11 (23.22 to 34.20)    | 1.43 (1.27 to 1.59)    | 0.29 (0.20 to 0.42) | 0.19 (0.15 to 0.27) | -1.58 (-1.76 to -1.39) | 13.75 (9.61 to 19.18)  | 10.42 (8.08 to 13.32)  | -0.96 (-1.14 to -0.78) |       |
| Ireland                    | 90.59 (75.89 to 107.72)   | 97.87 (84.83 to 112.53)   | 0.42 (0.35 to 0.49)    | 0.87 (0.76 to 0.96) | 0.66 (0.53 to 0.84) | -1.61 (-2.56 to -0.66) | 29.44 (24.40 to 35.63) | 25.50 (20.1 to 32.09)  | -0.80 (-1.30 to -0.30) |       |
| Israel                     | 70.49 (59.79 to 83.85)    | 70.21 (62.42 to 78.72)    | -0.08 (-0.20 to 0.05)  | 0.47 (0.41 to 0.53) | 0.38 (0.32 to 0.51) | -1.01 (-1.36 to -0.66) | 21.15 (17.17 to 26.12) | 18.50 (14.69 to 23.20) | -0.65 (-0.76 to -0.54) |       |
| Italy                      | 261.58 (226.94 to 297.14) | 227.51 (200.83 to 254.27) | -0.24 (-0.43 to -0.05) | 0.44 (0.39 to 0.70) | 0.76 (0.55 to 0.85) | 2.55 (2.03 to 3.06)    | 49.44 (36.73 to 63.71) | 46.95 (35.41 to 59.78) | 0.17 (0.00 to 0.34)    |       |
| Jamaica                    | 29.63 (24.88 to 35.60)    | 29.42 (24.46 to 35.27)    | 0.15 (0.05 to 0.25)    | 0.30 (0.23 to 0.35) | 0.24 (0.17 to 0.33) | -1.45 (-1.78 to -1.12) | 14.86 (11.53 to 17.70) | 11.50 (8.84 to 14.50)  | -1.28 (-1.50 to -1.06) |       |
| Japan                      | 151.17 (125.74 to 179.69) | 291.90 (251.75 to 336.57) | 1.48 (1.08 to 1.88)    | 0.25 (0.18 to 0.27) | 0.11 (0.09 to 0.16) | -2.39 (-2.83 to -1.95) | 27.14 (19.46 to 36.26) | 46.58 (31.41 to 63.54) | 1.21 (0.88 to 1.54)    |       |
| Jordan                     | 69.20 (60.07 to 79.85)    | 113.51 (95.78 to 133.87)  | 2.51 (2.23 to 2.79)    | 0.43 (0.30 to 0.59) | 0.23 (0.18 to 0.30) | -2.62 (-2.98 to -2.26) | 20.68 (15.47 to 26.15) | 22.01 (16.06 to 29.65) | 0.46 (0.34 to 0.58)    |       |
| Kazakhstan                 | 80.02 (67.16 to 96.26)    | 81.77 (68.13 to 97.46)    | 0.12 (0.06 to 0.18)    | 0.57 (0.41 to 0.72) | 0.46 (0.37 to 0.56) | -1.26 (-1.68 to -0.85) | 30.23 (24.06 to 37.42) | 26.97 (21.78 to 33.61) | -0.74 (-1.02 to -0.45) |       |
| Kenya                      | 6.80 (5.68 to 8.23)       | 8.33 (6.99 to 10.12)      | 0.31 (0.19 to 0.42)    | 0.81 (0.43 to 1.44) | 0.84 (0.50 to 1.26) | 0.31 (0.22 to 0.40)    | 21.25 (13.20 to 36.93) | 21.31 (13.76 to 30.78) | 0.26 (0.16 to 0.36)    |       |

|                                  |                           |                           |                        |                     |                     |                        |                        |                        |                        |
|----------------------------------|---------------------------|---------------------------|------------------------|---------------------|---------------------|------------------------|------------------------|------------------------|------------------------|
| Kiribati                         | 4.05 (3.25 to 4.96)       | 3.55 (2.90 to 4.32)       | -0.69 (-0.88 to -0.51) | 1.81 (0.99 to 2.71) | 1.08 (0.68 to 1.67) | -2.13 (-2.29 to -1.98) | 53.42 (24.47 to 92.59) | 31.83 (17.58 to 55.40) | -2.07 (-2.20 to -1.93) |
| Kuwait                           | 55.67 (51.70 to 60.02)    | 54.34 (45.07 to 65.64)    | 0.09 (-0.06 to 0.25)   | 0.19 (0.14 to 0.22) | 0.15 (0.12 to 0.20) | -0.66 (-1.06 to -0.25) | 13.39 (10.47 to 16.77) | 11.73 (8.74 to 15.53)  | -0.33 (-0.50 to -0.15) |
| Kyrgyzstan                       | 73.48 (61.75 to 87.12)    | 73.31 (61.61 to 87.09)    | -0.03 (-0.10 to 0.04)  | 0.42 (0.29 to 0.50) | 0.19 (0.16 to 0.25) | -3.52 (-3.86 to -3.19) | 28 (21.04 to 34.06)    | 17.37 (13.34 to 22.37) | -2.11 (-2.28 to -1.94) |
| Lao People's Democratic Republic | 2.98 (2.32 to 3.69)       | 3.67 (2.95 to 4.55)       | 0.79 (0.74 to 0.83)    | 0.45 (0.22 to 0.72) | 0.26 (0.14 to 0.41) | -2.40 (-2.60 to -2.19) | 13.04 (6.62 to 19.19)  | 6.97 (4.13 to 11.24)   | -2.47 (-2.65 to -2.30) |
| Latvia                           | 103.47 (89.32 to 119.13)  | 123.78 (108.48 to 139.23) | 0.42 (0.33 to 0.50)    | 0.34 (0.29 to 0.42) | 0.37 (0.30 to 0.48) | 0.22 (-0.08 to 0.51)   | 25.74 (20.10 to 32.35) | 28.66 (21.84 to 36.61) | 0.14 (-0.02 to 0.29)   |
| Lebanon                          | 33.16 (27.13 to 41.07)    | 46.20 (37.84 to 56.68)    | 1.23 (1.00 to 1.47)    | 0.14 (0.10 to 0.21) | 0.15 (0.08 to 0.23) | 0.32 (0.10 to 0.55)    | 8.48 (6.32 to 11.24)   | 10.18 (7.34 to 13.75)  | 0.79 (0.65 to 0.93)    |
| Lesotho                          | 7.67 (6.36 to 9.34)       | 8.77 (7.23 to 10.83)      | 0.48 (0.40 to 0.57)    | 0.55 (0.36 to 0.8)  | 0.69 (0.48 to 0.98) | 1.08 (0.85 to 1.31)    | 16.56 (10.77 to 23.28) | 20.29 (13.61 to 29.06) | 1.06 (0.87 to 1.26)    |
| Liberia                          | 7.84 (6.42 to 9.75)       | 8.46 (6.99 to 10.34)      | 0.57 (0.33 to 0.80)    | 0.52 (0.23 to 0.92) | 0.42 (0.26 to 0.62) | -0.84 (-1.09 to -0.60) | 19.69 (7.54 to 32.92)  | 13.96 (8.48 to 21.59)  | -1.16 (-1.44 to -0.88) |
| Libya                            | 23.56 (19.39 to 28.73)    | 25.77 (21.21 to 31.41)    | 0.56 (0.29 to 0.84)    | 0.21 (0.13 to 0.37) | 0.22 (0.15 to 0.31) | 0.11 (-0.02 to 0.24)   | 8.88 (6.41 to 12.85)   | 9.05 (6.69 to 11.82)   | 0.21 (0.11 to 0.31)    |
| Lithuania                        | 109.21 (95.7 to 123.65)   | 133.41 (123.84 to 142.65) | 0.84 (0.76 to 0.92)    | 0.32 (0.24 to 0.37) | 0.33 (0.26 to 0.42) | 0.13 (-0.20 to 0.47)   | 25.36 (19.61 to 31.92) | 28.75 (21.98 to 36.27) | 0.49 (0.33 to 0.65)    |
| Luxembourg                       | 166.34 (145.24 to 189.85) | 187.63 (163.86 to 213.76) | 0.37 (0.22 to 0.53)    | 0.96 (0.84 to 1.10) | 0.97 (0.72 to 1.16) | 0.55 (0.30 to 0.80)    | 42.53 (33.57 to 52.29) | 43.90 (33.95 to 55.68) | 0.27 (0.15 to 0.38)    |
| Madagascar                       | 6.62 (5.44 to 8.22)       | 7.25 (5.99 to 9.04)       | 0.38 (0.29 to 0.48)    | 0.53 (0.32 to 0.88) | 0.59 (0.40 to 0.88) | 0.45 (0.34 to 0.56)    | 17.91 (8.95 to 28.15)  | 16.98 (11.97 to 24.64) | -0.03 (-0.18 to 0.13)  |
| Malawi                           | 5.73 (4.70 to 7.05)       | 6.33 (5.28 to 7.8)        | 0.44 (0.40 to 0.48)    | 0.71 (0.49 to 1.02) | 0.67 (0.46 to 0.97) | -0.26 (-0.39 to -0.12) | 24.10 (13.49 to 42.83) | 19.08 (13.47 to 26.73) | -0.85 (-1.02 to -0.69) |
| Malaysia                         | 4.33 (3.64 to 5.05)       | 6.56 (5.71 to 7.56)       | 1.38 (1.19 to 1.57)    | 0.18 (0.14 to 0.22) | 0.17 (0.12 to 0.23) | -0.75 (-1.06 to -0.43) | 5.01 (4.15 to 6.10)    | 4.92 (3.71 to 6.26)    | -0.54 (-0.73 to -0.35) |
| Maldives                         | 4.10 (3.25 to 4.98)       | 4.94 (3.96 to 5.96)       | 0.74 (0.68 to 0.80)    | 0.53 (0.32 to 0.81) | 0.30 (0.23 to 0.40) | -2.37 (-2.52 to -2.22) | 13.21 (8.16 to 20.38)  | 7.20 (5.69 to 9.23)    | -2.50 (-2.68 to -2.32) |
| Mali                             | 7.19 (5.85 to 8.93)       | 8.08 (6.68 to 9.79)       | 0.63 (0.48 to 0.79)    | 0.49 (0.20 to 0.89) | 0.47 (0.26 to 0.71) | -0.28 (-0.46 to -0.10) | 19.25 (6.81 to 33.36)  | 16.53 (8.45 to 26.83)  | -0.64 (-0.80 to -0.48) |
| Malta                            | 66.69 (57.4 to 76.82)     | 72.00 (63.55 to 81.87)    | 0.11 (0.05 to 0.17)    | 0.54 (0.48 to 0.62) | 0.62 (0.48 to 0.74) | 0.78 (0.57 to 0.99)    | 20.61 (16.77 to 24.94) | 22.28 (18.12 to 27.35) | 0.40 (0.30 to 0.50)    |
| Marshall Islands                 | 4.22 (3.40 to 5.11)       | 4.10 (3.35 to 4.93)       | -0.25 (-0.43 to -0.08) | 1.32 (0.84 to 1.88) | 0.83 (0.50 to 1.31) | -1.90 (-2.04 to -1.76) | 38.63 (23.47 to 58.16) | 24.94 (14.63 to 40.72) | -1.80 (-1.93 to -1.68) |
| Mauritania                       | 8.95 (7.32 to 10.94)      | 11.87 (9.73 to 14.62)     | 0.85 (0.70 to 0.99)    | 0.68 (0.41 to 0.99) | 0.41 (0.28 to 0.57) | -2.01 (-2.18 to -1.84) | 22.06 (12.99 to 31.74) | 13.42 (9.08 to 18.70)  | -1.97 (-2.14 to -1.80) |
| Mauritius                        | 4.55 (3.68 to 5.63)       | 5.50 (4.43 to 6.63)       | 0.68 (0.63 to 0.73)    | 0.17 (0.14 to 0.19) | 0.22 (0.17 to 0.28) | 1.44 (1.10 to 1.78)    | 5.3 (4.63 to 6.29)     | 7.7 (5.86 to 9.69)     | 1.88 (1.53 to 2.23)    |



|                                  |                           |                           |                        |                     |                     |                        |                        |                        |                        |
|----------------------------------|---------------------------|---------------------------|------------------------|---------------------|---------------------|------------------------|------------------------|------------------------|------------------------|
| Mexico                           | 47.30 (40.55 to 55.27)    | 36.92 (31.76 to 42.73)    | -0.82 (-0.97 to -0.67) | 0.34 (0.31 to 0.39) | 0.45 (0.36 to 0.54) | 1.68 (1.33 to 2.02)    | 16.08 (13.61 to 19.12) | 17.13 (14.12 to 20.45) | 0.68 (0.41 to 0.96)    |
| Micronesia (Federated States of) | 4.44 (3.61 to 5.35)       | 4.11 (3.40 to 4.96)       | -0.45 (-0.62 to -0.27) | 1.36 (0.88 to 1.97) | 0.80 (0.48 to 1.32) | -2.09 (-2.29 to -1.88) | 40.59 (25.23 to 65.57) | 23.88 (12.56 to 43.11) | -2.07 (-2.24 to -1.89) |
| Monaco                           | 102.48 (86.41 to 120.82)  | 110.59 (93.15 to 130.73)  | 0.31 (0.29 to 0.33)    | 0.38 (0.27 to 0.50) | 0.36 (0.27 to 0.47) | -0.07 (-0.15 to 0.01)  | 22.98 (17.18 to 30.02) | 23.10 (17.08 to 29.93) | 0.08 (0.06 to 0.10)    |
| Mongolia                         | 68.37 (56.95 to 82.11)    | 69.72 (57.44 to 83.84)    | 0.02 (0.01 to 0.04)    | 0.73 (0.47 to 1.01) | 0.45 (0.33 to 0.61) | -2.10 (-2.26 to -1.94) | 38.19 (25.22 to 51.55) | 24.75 (19.13 to 31.11) | -1.88 (-2.00 to -1.75) |
| Montenegro                       | 135.02 (114.64 to 158.46) | 133.80 (112.95 to 156.37) | 0.02 (0.00 to 0.05)    | 0.29 (0.23 to 0.37) | 0.30 (0.23 to 0.37) | 0.27 (0.08 to 0.46)    | 29.84 (22.66 to 38.5)  | 28.38 (20.94 to 37.02) | -0.08 (-0.14 to -0.02) |
| Morocco                          | 15.56 (13.00 to 18.49)    | 17.60 (14.69 to 21.00)    | 0.60 (0.47 to 0.72)    | 0.23 (0.14 to 0.38) | 0.21 (0.15 to 0.28) | -0.17 (-0.38 to 0.04)  | 8.23 (5.69 to 11.59)   | 7.60 (5.86 to 9.68)    | -0.09 (-0.21 to 0.02)  |
| Mozambique                       | 5.71 (4.71 to 7.03)       | 6.30 (5.22 to 7.69)       | 0.38 (0.33 to 0.43)    | 0.69 (0.45 to 1.04) | 0.84 (0.58 to 1.20) | 0.94 (0.77 to 1.12)    | 22.30 (13.46 to 36.57) | 24.35 (16.57 to 34.27) | 0.62 (0.41 to 0.84)    |
| Myanmar                          | 3.09 (2.42 to 3.79)       | 3.71 (3.00 to 4.59)       | 0.72 (0.63 to 0.81)    | 0.22 (0.13 to 0.31) | 0.13 (0.1 to 0.17)  | -1.95 (-2.07 to -1.83) | 7.97 (4.53 to 12.88)   | 4.34 (3.28 to 6.04)    | -2.29 (-2.41 to -2.17) |
| Namibia                          | 9.39 (7.72 to 11.59)      | 11.47 (9.48 to 14.12)     | 0.66 (0.54 to 0.77)    | 0.72 (0.50 to 1.00) | 0.63 (0.45 to 0.87) | -0.61 (-0.80 to -0.41) | 21.26 (13.8 to 28.84)  | 18.09 (12.71 to 26.34) | -0.52 (-0.63 to -0.41) |
| Nauru                            | 5.33 (4.35 to 6.41)       | 5.02 (4.11 to 6.11)       | -0.61 (-0.94 to -0.28) | 1.37 (0.82 to 2.13) | 0.92 (0.54 to 1.45) | -1.85 (-2.09 to -1.61) | 42.03 (22.9 to 73.19)  | 27.18 (13.97 to 47.82) | -1.87 (-2.08 to -1.65) |
| Nepal                            | 16.18 (12.92 to 20.54)    | 18.72 (15.04 to 23.18)    | 0.55 (0.50 to 0.59)    | 0.98 (0.57 to 1.86) | 0.59 (0.36 to 0.98) | -1.88 (-2.06 to -1.69) | 28.52 (18.28 to 47.84) | 15.65 (10.93 to 23.88) | -2.15 (-2.36 to -1.94) |
| Netherlands                      | 142.28 (129.20 to 155.78) | 73.64 (63.08 to 85.72)    | -2.19 (-2.78 to -1.60) | 1.43 (1.24 to 1.75) | 2.08 (1.58 to 2.40) | 1.35 (0.87 to 1.84)    | 47.17 (39.07 to 56.59) | 41.11 (35.20 to 47.09) | -0.50 (-0.93 to -0.06) |
| New Zealand                      | 160.29 (139.19 to 182.59) | 168.32 (152.62 to 186.95) | 0.20 (0.15 to 0.26)    | 0.53 (0.45 to 0.59) | 0.38 (0.32 to 0.46) | -1.70 (-2.05 to -1.34) | 34.31 (26.39 to 43.21) | 31.98 (23.24 to 41.73) | -0.32 (-0.42 to -0.22) |
| Nicaragua                        | 23.25 (19.28 to 27.88)    | 26.41 (22.30 to 31.28)    | 0.20 (0.10 to 0.31)    | 0.15 (0.12 to 0.18) | 0.17 (0.13 to 0.21) | 0.48 (0.30 to 0.67)    | 7.80 (6.25 to 9.75)    | 8.26 (6.41 to 10.34)   | 0.12 (-0.02 to 0.25)   |
| Niger                            | 7.12 (5.75 to 8.74)       | 7.75 (6.26 to 9.48)       | 0.37 (0.26 to 0.48)    | 0.58 (0.28 to 0.99) | 0.5 (0.29 to 0.79)  | -0.71 (-0.92 to -0.51) | 21.59 (8.82 to 38.22)  | 17.16 (9.15 to 26.85)  | -1.08 (-1.30 to -0.86) |
| Nigeria                          | 8.88 (7.36 to 10.86)      | 11.03 (9.13 to 13.41)     | 0.98 (0.83 to 1.14)    | 0.57 (0.28 to 0.97) | 0.52 (0.28 to 0.83) | -0.11 (-0.21 to -0.02) | 19.98 (11.19 to 32.55) | 17.08 (10.24 to 26.72) | -0.43 (-0.51 to -0.35) |
| Niue                             | 5.82 (4.77 to 7.03)       | 5.53 (4.56 to 6.74)       | -0.24 (-0.39 to -0.08) | 0.96 (0.67 to 1.38) | 0.63 (0.38 to 0.91) | -1.75 (-1.86 to -1.63) | 29.80 (19.61 to 46.61) | 19.00 (10.29 to 29.66) | -1.92 (-2.07 to -1.78) |
| North Macedonia                  | 119.00 (100.79 to 140.81) | 122.13 (103.27 to 143.78) | 0.14 (0.12 to 0.17)    | 0.20 (0.15 to 0.25) | 0.18 (0.13 to 0.23) | -0.21 (-0.36 to -0.07) | 23.91 (17.63 to 31.43) | 23.32 (16.99 to 31.08) | 0.00 (-0.04 to 0.05)   |
| Northern Mariana                 | 6.60 (5.47 to 7.98)       | 5.79 (4.80 to 6.96)       | -0.61 (-0.80 to -0.42) | 1.28 (0.85 to 1.82) | 0.38 (0.26 to 0.73) | -4.76 (-5.32 to -4.19) | 34.73 (23.54 to 50.03) | 11.56 (7.82 to 20.63)  | -4.28 (-4.78 to -3.78) |

|                       |                           |                           |                        |                     |                     |                        |                        |                         |                        |  |
|-----------------------|---------------------------|---------------------------|------------------------|---------------------|---------------------|------------------------|------------------------|-------------------------|------------------------|--|
| Islands               | 406.73                    | 498.95                    |                        |                     |                     |                        |                        |                         |                        |  |
| Norway                | (342.53 to 478.15)        | (429.41 to 570.55)        | 0.38 (0.24 to 0.52)    | 0.43 (0.39 to 0.58) | 0.38 (0.32 to 0.52) | -0.86 (-1.19 to -0.53) | 69.15 (49.57 to 92.09) | 80.37 (56.25 to 108.56) | 0.17 (0.01 to 0.33)    |  |
| Oman                  | 32.04 (26.30 to 38.55)    | 33.81 (27.79 to 40.80)    | 0.24 (0.08 to 0.40)    | 0.23 (0.12 to 0.39) | 0.23 (0.15 to 0.34) | 0.58 (0.34 to 0.82)    | 10.5 (7.14 to 15.11)   | 9.96 (7.66 to 12.72)    | 0.17 (0.00 to 0.35)    |  |
| Pakistan              | 13.75 (11.11 to 17.15)    | 16.77 (13.78 to 21.25)    | 0.77 (0.72 to 0.81)    | 0.78 (0.39 to 1.57) | 0.62 (0.41 to 0.99) | -0.87 (-0.93 to -0.80) | 21.52 (12.69 to 38.34) | 17.80 (12.91 to 25.37)  | -0.71 (-0.77 to -0.66) |  |
| Palau                 | 5.62 (4.60 to 6.79)       | 5.22 (4.30 to 6.32)       | -0.40 (-0.56 to -0.24) | 0.88 (0.53 to 1.46) | 0.62 (0.29 to 0.97) | -1.36 (-1.47 to -1.24) | 26.21 (13.51 to 47.84) | 19.34 (8.32 to 32.27)   | -1.21 (-1.31 to -1.10) |  |
| Palestine             | 31.49 (25.86 to 38.19)    | 35.42 (29.15 to 42.61)    | 0.71 (0.52 to 0.90)    | 0.33 (0.23 to 0.50) | 0.20 (0.15 to 0.29) | -2.83 (-3.48 to -2.18) | 11.67 (8.60 to 16.06)  | 9.47 (7.18 to 12.75)    | -1.16 (-1.42 to -0.90) |  |
| Panama                | 30.64 (26.19 to 35.44)    | 31.9 (26.95 to 37.19)     | 0.09 (0.04 to 0.14)    | 0.40 (0.33 to 0.57) | 0.59 (0.45 to 0.76) | 2.20 (1.67 to 2.73)    | 19.61 (16.04 to 24.02) | 24.28 (18.4 to 31.52)   | 1.57 (1.10 to 2.05)    |  |
| Papua New Guinea      | 4.05 (3.24 to 4.88)       | 3.65 (2.96 to 4.45)       | -0.52 (-0.69 to -0.35) | 0.54 (0.31 to 0.80) | 0.42 (0.27 to 0.63) | -1.02 (-1.10 to -0.93) | 19.34 (11.2 to 29.45)  | 14.68 (9.5 to 21.87)    | -1.09 (-1.18 to -1.00) |  |
| Paraguay              | 35.78 (30.69 to 41.49)    | 30.96 (26.24 to 36.59)    | -0.62 (-0.73 to -0.50) | 0.16 (0.13 to 0.21) | 0.21 (0.15 to 0.28) | 1.35 (1.08 to 1.63)    | 10.62 (8.39 to 13.36)  | 10.30 (7.70 to 13.16)   | 0.12 (-0.06 to 0.29)   |  |
| Peru                  | 17.18 (14.20 to 20.56)    | 16.74 (13.74 to 20.14)    | -0.14 (-0.17 to -0.10) | 0.69 (0.47 to 0.93) | 0.23 (0.16 to 0.32) | -4.20 (-4.68 to -3.72) | 34.79 (19.65 to 53.77) | 9.31 (6.89 to 12.58)    | -5.08 (-5.69 to -4.47) |  |
| Philippines           | 4.47 (3.59 to 5.38)       | 4.96 (4.02 to 6.00)       | 0.35 (0.25 to 0.46)    | 0.35 (0.16 to 0.46) | 0.16 (0.13 to 0.20) | -3.25 (-3.54 to -2.95) | 8.94 (5.36 to 11.07)   | 4.87 (4.06 to 6.26)     | -2.61 (-2.86 to -2.35) |  |
| Poland                | 418.60 (351.62 to 498.71) | 177.25 (157.39 to 199.48) | -3.73 (-4.52 to -2.94) | 0.44 (0.41 to 0.51) | 0.53 (0.42 to 0.62) | 0.82 (0.68 to 0.96)    | 72.05 (51.85 to 95.72) | 38.44 (29.32 to 49.04)  | -2.70 (-3.28 to -2.11) |  |
| Portugal              | 52.37 (46.30 to 58.76)    | 74.24 (66.91 to 82.44)    | 0.72 (0.46 to 0.99)    | 0.69 (0.60 to 0.76) | 1.06 (0.57 to 1.24) | 2.38 (1.99 to 2.77)    | 20.51 (17.46 to 24.14) | 27.82 (20.23 to 33.05)  | 1.24 (1.07 to 1.41)    |  |
| Puerto Rico           | 31.12 (29.32 to 33.10)    | 30.88 (28.28 to 33.59)    | 0.00 (-0.04 to 0.04)   | 0.56 (0.43 to 0.64) | 0.27 (0.19 to 0.41) | -3.70 (-4.28 to -3.10) | 21.05 (16.43 to 24.23) | 12.28 (9.43 to 16.08)   | -2.69 (-3.09 to -2.29) |  |
| Qatar                 | 38.47 (31.44 to 45.79)    | 44.46 (36.75 to 53.66)    | 0.53 (0.42 to 0.64)    | 0.37 (0.24 to 0.59) | 0.34 (0.21 to 0.51) | 0.52 (0.07 to 0.98)    | 14.06 (10.55 to 19.68) | 13.06 (9.28 to 17.59)   | 0.13 (-0.12 to 0.37)   |  |
| Republic of Korea     | 37.89 (33.49 to 42.88)    | 70.21 (66.03 to 74.79)    | 1.25 (0.89 to 1.61)    | 1.76 (0.56 to 2.34) | 0.30 (0.23 to 0.39) | -7.96 (-8.67 to -7.25) | 31.72 (18.30 to 38.85) | 15 (11.13 to 19.33)     | -3.63 (-4.02 to -3.23) |  |
| Republic of Moldova   | 67.21 (55.76 to 80.49)    | 66.12 (59.51 to 73.09)    | 0.47 (0.09 to 0.85)    | 0.38 (0.32 to 0.47) | 0.33 (0.27 to 0.39) | -0.60 (-0.96 to -0.25) | 22.87 (18.45 to 27.69) | 20.72 (16.98 to 25.12)  | -0.20 (-0.52 to 0.13)  |  |
| Romania               | 70.01 (58.65 to 82.51)    | 70.93 (63.66 to 79.55)    | 0.37 (0.16 to 0.59)    | 0.27 (0.23 to 0.31) | 0.23 (0.18 to 0.28) | -0.65 (-1.01 to -0.29) | 21.99 (17.23 to 27.18) | 17.97 (13.92 to 22.6)   | -0.63 (-0.89 to -0.37) |  |
| Russian Federation    | 95.59 (81.25 to 111.84)   | 85.89 (72.98 to 100.35)   | -0.12 (-0.25 to 0.00)  | 0.57 (0.42 to 0.66) | 0.56 (0.46 to 0.66) | -0.40 (-0.74 to -0.06) | 30.76 (24.06 to 37.42) | 28.04 (22.97 to 34.48)  | -0.52 (-0.70 to -0.35) |  |
| Rwanda                | 6.69 (5.55 to 8.31)       | 7.89 (6.47 to 9.74)       | 0.57 (0.40 to 0.74)    | 0.92 (0.61 to 1.40) | 0.65 (0.42 to 0.92) | -1.79 (-2.06 to -1.51) | 29.08 (17.93 to 46.16) | 19.33 (12.66 to 28.48)  | -1.92 (-2.15 to -1.69) |  |
| Saint Kitts and Nevis | 29.59 (24.68 to 35.93)    | 28.95 (23.75 to 35.61)    | 0.06 (-0.02 to 0.14)   | 2.25 (1.70 to 2.63) | 1.44 (1.06 to 2.05) | -2.01 (-2.26 to -1.76) | 67.93 (52.91 to 79.57) | 42.16 (29.05 to 61.00)  | -2.07 (-2.32 to -1.82) |  |
| Saint Lucia           | 25.70 (21.15 to 27.48)    | 27.48 (22.74 to 27.48)    | 0.32 (0.22 to 0.32)    | 0.99 (0.78 to 0.99) | 0.65 (0.51 to 0.65) | -2.24 (-2.69 to -2.24) | 32.61 (26.63 to 32.61) | 22.26 (17.86 to 22.26)  | -1.84 (-2.19 to -1.84) |  |

|                                  |                           |                           |                        |                     |                     |                        |                        |                        |                        |
|----------------------------------|---------------------------|---------------------------|------------------------|---------------------|---------------------|------------------------|------------------------|------------------------|------------------------|
|                                  | to 31.22)                 | to 33.54)                 | 0.42)                  | 1.15)               | 0.84)               | to -1.78)              | to 37.29)              | to 28.14)              | to -1.49)              |
| Saint Vincent and the Grenadines | 24.91 (20.72 to 30.36)    | 24.40 (20.24 to 29.76)    | 0.24 (0.13 to 0.34)    | 1.31 (1.08 to 1.57) | 1.22 (0.98 to 1.53) | -0.56 (-0.70 to -0.41) | 44.25 (37.35 to 51.61) | 38.61 (31.46 to 48.07) | -0.80 (-0.94 to -0.67) |
| Samoa                            | 5.60 (4.60 to 6.71)       | 4.77 (3.92 to 5.78)       | -0.77 (-1.05 to -0.49) | 0.98 (0.66 to 1.49) | 0.63 (0.45 to 0.85) | -1.64 (-1.80 to -1.47) | 27.95 (18.61 to 40.58) | 17.97 (11.92 to 26.18) | -1.62 (-1.75 to -1.49) |
| San Marino                       | 107.02 (89.88 to 126.67)  | 112.86 (94.72 to 132.67)  | 0.23 (0.21 to 0.24)    | 0.37 (0.27 to 0.48) | 0.36 (0.22 to 0.53) | 0.22 (0.06 to 0.38)    | 21.57 (15.79 to 28.34) | 21.79 (15.52 to 28.71) | 0.15 (0.11 to 0.19)    |
| Sao Tome and Principe            | 10.50 (8.66 to 12.87)     | 11.85 (9.61 to 14.64)     | 0.59 (0.46 to 0.71)    | 0.46 (0.26 to 0.73) | 0.31 (0.21 to 0.50) | -1.58 (-1.93 to -1.24) | 15.7 (9.25 to 23.73)   | 10.34 (7.41 to 15.57)  | -1.71 (-2.03 to -1.38) |
| Saudi Arabia                     | 33.86 (28.47 to 40.38)    | 34.43 (28.66 to 41.36)    | 0.22 (0.09 to 0.35)    | 0.19 (0.11 to 0.31) | 0.15 (0.11 to 0.21) | -0.60 (-0.71 to -0.48) | 9.73 (6.96 to 13.65)   | 8.9 (6.65 to 11.75)    | -0.18 (-0.25 to -0.10) |
| Senegal                          | 8.06 (6.57 to 9.88)       | 8.84 (7.25 to 11.10)      | 0.39 (0.27 to 0.51)    | 0.55 (0.29 to 0.93) | 0.43 (0.27 to 0.65) | -1.00 (-1.21 to -0.78) | 18.61 (9.28 to 29.66)  | 14.15 (8.71 to 21.53)  | -1.12 (-1.32 to -0.91) |
| Serbia                           | 118.24 (99.70 to 138.39)  | 151.50 (130.14 to 173.84) | 0.43 (0.26 to 0.61)    | 0.49 (0.37 to 0.78) | 0.76 (0.50 to 0.97) | 2.49 (2.05 to 2.94)    | 31.72 (24.28 to 43.38) | 39.47 (29.72 to 49.82) | 0.83 (0.67 to 0.98)    |
| Seychelles                       | 4.66 (3.75 to 5.71)       | 5.45 (4.43 to 6.55)       | 0.52 (0.44 to 0.60)    | 0.30 (0.19 to 0.38) | 0.22 (0.16 to 0.30) | -1.44 (-1.65 to -1.23) | 8.38 (5.69 to 10.68)   | 6.28 (4.77 to 7.85)    | -1.35 (-1.51 to -1.19) |
| Sierra Leone                     | 7.33 (6.06 to 9.02)       | 8.45 (6.95 to 10.53)      | 0.64 (0.51 to 0.77)    | 0.42 (0.19 to 0.72) | 0.43 (0.24 to 0.61) | 0.20 (-0.07 to 0.48)   | 15.88 (6.30 to 28.04)  | 15.30 (8.12 to 23.35)  | 0.00 (-0.27 to 0.26)   |
| Singapore                        | 47.14 (38.3 to 56.56)     | 41.88 (34.28 to 51.91)    | -0.58 (-0.74 to -0.43) | 0.18 (0.14 to 0.20) | 0.07 (0.06 to 0.11) | -3.18 (-3.41 to -2.95) | 12.19 (9.33 to 15.58)  | 8.16 (5.69 to 11.25)   | -1.52 (-1.73 to -1.31) |
| Slovakia                         | 165.72 (148.05 to 183.09) | 154.57 (140.40 to 170.08) | -0.05 (-0.12 to 0.02)  | 0.54 (0.45 to 0.84) | 0.68 (0.48 to 0.90) | 1.56 (1.21 to 1.91)    | 40.62 (31.28 to 53.36) | 40.31 (30.39 to 50.67) | 0.34 (0.19 to 0.49)    |
| Slovenia                         | 167.07 (146.63 to 189.8)  | 179.18 (160.70 to 199.69) | 0.15 (0.08 to 0.21)    | 0.44 (0.33 to 0.56) | 0.39 (0.28 to 0.52) | -1.39 (-2.13 to -0.65) | 34.68 (25.60 to 44.77) | 34.27 (24.57 to 44.81) | -0.42 (-0.67 to -0.17) |
| Solomon Islands                  | 3.49 (2.80 to 4.25)       | 3.35 (2.73 to 4.12)       | -0.31 (-0.46 to -0.15) | 0.75 (0.42 to 1.16) | 0.53 (0.33 to 0.79) | -1.42 (-1.56 to -1.29) | 24.39 (12.55 to 43.26) | 17.28 (10.22 to 29.48) | -1.38 (-1.51 to -1.25) |
| Somalia                          | 5.39 (4.41 to 6.68)       | 5.28 (4.33 to 6.56)       | -0.09 (-0.12 to -0.06) | 0.55 (0.29 to 0.91) | 0.48 (0.30 to 0.79) | -0.45 (-0.53 to -0.37) | 17.8 (7.75 to 34.12)   | 14.47 (8.44 to 24.4)   | -0.63 (-0.69 to -0.56) |
| South Africa                     | 11.04 (9.21 to 13.55)     | 12.40 (10.36 to 15.05)    | 0.52 (0.44 to 0.60)    | 0.39 (0.30 to 0.50) | 0.39 (0.30 to 0.47) | 0.13 (-0.38 to 0.64)   | 15.07 (10.33 to 20.06) | 12.17 (9.76 to 14.04)  | -0.56 (-0.99 to -0.14) |
| South Sudan                      | 6.93 (5.69 to 8.55)       | 7.78 (6.41 to 9.49)       | 0.35 (0.31 to 0.40)    | 0.68 (0.39 to 1.43) | 0.65 (0.36 to 1.40) | -0.05 (-0.09 to 0.00)  | 22.59 (10.42 to 43.44) | 19.12 (11.06 to 39.88) | -0.45 (-0.58 to -0.32) |
| Spain                            | 90.41 (86.16 to 94.9)     | 134.10 (127.51 to 141.19) | 0.77 (0.60 to 0.95)    | 0.54 (0.46 to 0.60) | 0.35 (0.29 to 0.50) | -2.16 (-2.54 to -1.78) | 24.91 (20.33 to 30.25) | 27.31 (20.61 to 34.99) | -0.26 (-0.47 to -0.05) |
| Sri Lanka                        | 5.98 (4.90 to 7.28)       | 9.51 (8.29 to 10.90)      | 1.67 (1.38 to 1.96)    | 0.18 (0.14 to 0.23) | 0.10 (0.07 to 0.13) | -2.15 (-2.31 to -1.99) | 5.73 (4.38 to 7.09)    | 3.77 (2.86 to 4.79)    | -1.45 (-1.57 to -1.33) |
| Sudan                            | 25.18 (20.47 to 30.96)    | 25.17 (20.47 to 30.96)    | 0.90 (0.76 to 1.04)    | 0.21 (0.10 to 0.32) | 0.25 (0.14 to 0.36) | 0.95 (0.78 to 1.12)    | 9.58 (5.87 to 13.29)   | 10.84 (7.56 to 14.12)  | 0.71 (0.58 to 0.84)    |

|                            |                           |                           |                        |                     |                     |                        |                        |                        |                        |
|----------------------------|---------------------------|---------------------------|------------------------|---------------------|---------------------|------------------------|------------------------|------------------------|------------------------|
|                            | to 31.02)                 | to 37.98)                 | 1.05)                  | 0.39)               | 0.43)               | 1.11)                  | 15.53)                 | to 15.32)              | 0.84)                  |
| Suriname                   | 25.78 (21.39 to 31.18)    | 25.28 (20.76 to 30.88)    | 0.11 (0.01 to 0.22)    | 1.00 (0.77 to 1.18) | 0.66 (0.50 to 0.86) | -1.99 (-2.24 to -1.73) | 35.66 (26.78 to 43.03) | 23.00 (18.20 to 29.10) | -1.99 (-2.24 to -1.75) |
| Sweden                     | 294.18 (253.51 to 336.93) | 315.22 (271.18 to 360.86) | 0.31 (0.28 to 0.34)    | 0.68 (0.56 to 0.75) | 0.38 (0.31 to 0.56) | -3.16 (-4.26 to -2.06) | 56.12 (41.20 to 73.41) | 53.00 (37.35 to 71.73) | -0.35 (-0.54 to -0.16) |
| Switzerland                | 129.02 (116.30 to 142.70) | 134.73 (121.98 to 148.05) | 0.09 (0.06 to 0.12)    | 0.68 (0.54 to 0.77) | 0.58 (0.47 to 0.75) | -1.03 (-1.80 to -0.26) | 32.21 (25.49 to 39.69) | 29.51 (22.30 to 37.67) | -0.56 (-0.82 to -0.31) |
| Syrian Arab Republic       | 28.71 (23.39 to 35.03)    | 33.67 (27.34 to 40.47)    | 0.96 (0.65 to 1.26)    | 0.46 (0.23 to 0.76) | 0.36 (0.19 to 0.52) | -1.00 (-1.20 to -0.80) | 14.71 (9.86 to 20.18)  | 12.75 (9.00 to 16.93)  | -0.46 (-0.53 to -0.39) |
| Taiwan (Province of China) | 11.23 (9.74 to 12.86)     | 27.80 (24.80 to 31.28)    | 4.29 (3.71 to 4.86)    | 0.91 (0.57 to 1.04) | 0.50 (0.38 to 0.65) | -2.08 (-3.37 to -0.78) | 17.35 (12.32 to 19.43) | 12.40 (10.06 to 15.44) | -0.85 (-1.78 to 0.10)  |
| Tajikistan                 | 68.84 (56.59 to 83.10)    | 71.19 (59.54 to 85.49)    | 0.12 (0.07 to 0.18)    | 0.41 (0.28 to 0.58) | 0.3 (0.22 to 0.41)  | -0.79 (-0.88 to -0.70) | 30.29 (19.52 to 43.28) | 20.60 (15.55 to 26.90) | -0.89 (-1.10 to -0.69) |
| Thailand                   | 3.31 (2.57 to 4.15)       | 4.28 (3.44 to 5.22)       | 0.96 (0.83 to 1.08)    | 0.2 (0.14 to 0.26)  | 0.12 (0.08 to 0.15) | -2.46 (-2.78 to -2.14) | 6.06 (4.39 to 7.89)    | 3.64 (2.76 to 4.68)    | -2.40 (-2.71 to -2.09) |
| Timor-Leste                | 3.20 (2.51 to 3.91)       | 3.90 (3.14 to 4.72)       | 0.84 (0.75 to 0.94)    | 0.42 (0.17 to 0.83) | 0.36 (0.20 to 0.61) | -0.57 (-0.70 to -0.44) | 11.64 (5.58 to 22.42)  | 9.14 (5.17 to 14.89)   | -0.95 (-1.13 to -0.77) |
| Togo                       | 9.42 (7.74 to 11.41)      | 9.00 (7.38 to 11.07)      | 0.03 (-0.09 to 0.15)   | 0.49 (0.28 to 0.76) | 0.48 (0.32 to 0.68) | -0.05 (-0.31 to 0.21)  | 17.29 (9.05 to 26.59)  | 16.30 (10.74 to 22.75) | -0.23 (-0.48 to 0.01)  |
| Tokelau                    | 4.65 (3.78 to 5.66)       | 5.36 (4.37 to 6.54)       | 0.72 (0.46 to 0.97)    | 0.89 (0.57 to 1.34) | 0.58 (0.42 to 0.78) | -1.72 (-1.88 to -1.57) | 25.84 (15.77 to 38.77) | 16.11 (11.19 to 22.98) | -1.68 (-1.80 to -1.56) |
| Tonga                      | 5.55 (4.56 to 6.66)       | 4.96 (4.08 to 5.98)       | -0.51 (-0.69 to -0.32) | 1.14 (0.67 to 1.64) | 0.76 (0.56 to 1.02) | -1.73 (-1.92 to -1.54) | 31.30 (19.82 to 44.12) | 21.58 (15.55 to 30.10) | -1.63 (-1.83 to -1.44) |
| Trinidad and Tobago        | 27.68 (22.88 to 33.63)    | 27.49 (22.91 to 33.71)    | 0.31 (0.17 to 0.45)    | 0.34 (0.24 to 0.39) | 0.29 (0.21 to 0.39) | -0.98 (-1.25 to -0.72) | 14.27 (10.86 to 16.75) | 12.54 (9.51 to 16.14)  | -0.66 (-0.84 to -0.48) |
| Tunisia                    | 35.29 (29.00 to 42.68)    | 40.47 (33.21 to 49.35)    | 0.59 (0.45 to 0.73)    | 0.15 (0.1 to 0.22)  | 0.14 (0.09 to 0.20) | -0.05 (-0.15 to 0.06)  | 9.05 (6.50 to 12.22)   | 9.36 (6.89 to 12.40)   | 0.27 (0.17 to 0.37)    |
| Turkey                     | 50.66 (44.42 to 56.99)    | 98.87 (84.96 to 113.45)   | 2.04 (1.87 to 2.20)    | 0.67 (0.43 to 1.06) | 0.40 (0.30 to 0.56) | -1.87 (-2.02 to -1.72) | 27.88 (19.30 to 38.53) | 25.05 (19.42 to 32.24) | -0.61 (-0.70 to -0.51) |
| Turkmenistan               | 69.03 (57.31 to 82.24)    | 77.89 (64.42 to 92.76)    | 0.43 (0.32 to 0.54)    | 0.37 (0.28 to 0.49) | 0.33 (0.22 to 0.46) | -0.50 (-0.78 to -0.21) | 24.59 (17.78 to 31.67) | 22.90 (16.63 to 29.27) | -0.20 (-0.38 to -0.02) |
| Tuvalu                     | 4.48 (3.63 to 5.44)       | 4.08 (3.38 to 4.88)       | -0.47 (-0.63 to -0.30) | 1.08 (0.65 to 1.59) | 0.71 (0.47 to 1.05) | -1.60 (-1.73 to -1.47) | 33.30 (17.86 to 54.06) | 21.17 (13.37 to 33.22) | -1.65 (-1.76 to -1.55) |
| Uganda                     | 5.79 (4.75 to 7.14)       | 7.14 (5.88 to 8.92)       | 1.01 (0.88 to 1.15)    | 0.59 (0.37 to 0.91) | 0.61 (0.40 to 0.92) | -0.03 (-0.17 to 0.10)  | 17.22 (11.39 to 25.60) | 17.40 (12.18 to 25.46) | -0.02 (-0.16 to 0.13)  |
| Ukraine                    | 68.71 (57.64 to 82.57)    | 68 (57.27 to 80.79)       | 0.19 (0.03 to 0.35)    | 0.34 (0.26 to 0.45) | 0.39 (0.31 to 0.48) | 0.17 (-0.10 to 0.44)   | 21.06 (16.76 to 26.65) | 23.62 (18.99 to 28.82) | 0.34 (0.12 to 0.56)    |
| United Arab Emirates       | 36.50 (30.28 to 44.12)    | 42.72 (35.58 to 51.97)    | 0.73 (0.60 to 0.87)    | 0.21 (0.09 to 0.43) | 0.24 (0.15 to 0.43) | 0.72 (0.25 to 1.20)    | 10.79 (6.88 to 16.90)  | 12.40 (8.88 to 17.45)  | 0.73 (0.52 to 0.94)    |
| United Kingdom             | 223.81 (197.49 to 240.37) | 240.37 (214.96 to 257.78) | 0.17 (0.12 to 0.21)    | 0.97 (0.85 to 1.18) | 1.30 (1.12 to 1.44) | 1.22 (0.84 to 1.59)    | 52.80 (41.67 to 65.37) | 59.34 (47.21 to 72.73) | 0.41 (0.25 to 0.57)    |

|                                    |                           |                           |                        |                     |                     |                        |                        |                        |                        |  |
|------------------------------------|---------------------------|---------------------------|------------------------|---------------------|---------------------|------------------------|------------------------|------------------------|------------------------|--|
|                                    | 251.35)                   | 267.14)                   |                        |                     |                     |                        |                        |                        |                        |  |
| United Republic of Tanzania        | 7.20 (5.89 to 8.90)       | 7.76 (6.36 to 9.50)       | 0.22 (0.10 to 0.35)    | 0.58 (0.40 to 0.81) | 0.60 (0.41 to 0.89) | 0.38 (0.19 to 0.57)    | 19.56 (13.24 to 32.21) | 18.91 (12.48 to 26.55) | 0.25 (0.07 to 0.43)    |  |
| United States of America           | 343.12 (295.81 to 394.51) | 193.07 (179.65 to 206.87) | -1.59 (-2.08 to -1.09) | 0.67 (0.60 to 0.82) | 1.02 (0.80 to 1.11) | 1.80 (1.52 to 2.07)    | 64.72 (47.50 to 84.88) | 49.82 (40.25 to 60.19) | -0.48 (-0.78 to -0.18) |  |
| United States Virgin Islands       | 31.96 (26.73 to 38.19)    | 33.22 (27.69 to 39.97)    | 0.23 (0.16 to 0.31)    | 0.81 (0.56 to 1.02) | 0.45 (0.34 to 0.59) | -2.32 (-2.66 to -1.99) | 26.35 (19.55 to 32.66) | 15.91 (12.54 to 20.17) | -2.03 (-2.27 to -1.78) |  |
| Uruguay                            | 17.66 (14.59 to 21.30)    | 17.41 (14.35 to 21.13)    | -0.17 (-0.21 to -0.13) | 0.27 (0.23 to 0.37) | 0.41 (0.35 to 0.47) | 1.10 (0.62 to 1.58)    | 9.71 (8.22 to 12.16)   | 12.78 (11.11 to 14.58) | 0.63 (0.27 to 0.98)    |  |
| Uzbekistan                         | 74.25 (62.30 to 88.98)    | 75.79 (63.42 to 90.50)    | -0.02 (-0.05 to 0.01)  | 0.28 (0.20 to 0.39) | 0.29 (0.23 to 0.39) | -0.33 (-0.58 to -0.09) | 23.48 (17.64 to 29.48) | 21.90 (17.37 to 27.16) | -0.47 (-0.58 to -0.36) |  |
| Vanuatu                            | 4.27 (3.44 to 5.21)       | 3.94 (3.23 to 4.77)       | -0.42 (-0.59 to -0.24) | 1.22 (0.69 to 2.03) | 0.84 (0.52 to 1.24) | -1.74 (-1.94 to -1.54) | 34.45 (18.68 to 54.26) | 25.36 (15.29 to 38.79) | -1.58 (-1.80 to -1.36) |  |
| Venezuela (Bolivarian Republic of) | 29.50 (25.29 to 33.94)    | 29.03 (24.54 to 34.19)    | -0.01 (-0.05 to 0.03)  | 0.25 (0.17 to 0.29) | 0.15 (0.11 to 0.21) | -2.32 (-2.82 to -1.82) | 12.00 (9.33 to 14.20)  | 8.87 (6.84 to 11.26)   | -1.36 (-1.66 to -1.05) |  |
| Viet Nam                           | 9.12 (7.04 to 11.43)      | 18.35 (14.68 to 22.55)    | 2.72 (2.05 to 3.39)    | 0.58 (0.30 to 0.88) | 0.22 (0.15 to 0.32) | -3.98 (-4.35 to -3.61) | 13.87 (8.53 to 18.99)  | 7.60 (5.65 to 9.80)    | -2.48 (-2.72 to -2.23) |  |
| Yemen                              | 23.40 (18.89 to 29.12)    | 28.03 (22.65 to 34.94)    | 0.95 (0.76 to 1.14)    | 0.28 (0.15 to 0.52) | 0.33 (0.22 to 0.52) | 0.85 (0.73 to 0.97)    | 10.64 (7.11 to 15.89)  | 12.40 (9.18 to 16.77)  | 0.79 (0.66 to 0.93)    |  |
| Zambia                             | 6.36 (5.26 to 7.78)       | 8.42 (6.92 to 10.46)      | 0.86 (0.63 to 1.10)    | 0.86 (0.60 to 1.32) | 0.70 (0.51 to 0.94) | -0.86 (-1.04 to -0.69) | 27.59 (16.02 to 45.42) | 20.49 (14.47 to 27.66) | -1.05 (-1.14 to -0.96) |  |
| Zimbabwe                           | 8.69 (7.15 to 10.74)      | 8.91 (7.29 to 11.06)      | 0.21 (0.11 to 0.30)    | 0.47 (0.36 to 0.64) | 0.58 (0.35 to 0.86) | 0.96 (0.85 to 1.06)    | 14.20 (10.79 to 19.20) | 17.38 (10.28 to 25.35) | 1.22 (0.99 to 1.44)    |  |

Abbreviations: CI=confidence interval. DALY=disability adjusted life year.

EAPC=estimated annual percentage change. UI=uncertainty interval.

**Supplementary Table 4** Incident cases, YLLs and YLDs of inflammatory bowel disease (IBD) in 1990 and 2019 and their percentage change from 1990 to 2019

| Characteristics         | Incident cases                  |                                 |                                     | YLLs                            |                                 |                                     | YLDs                            |                                 |                                     |
|-------------------------|---------------------------------|---------------------------------|-------------------------------------|---------------------------------|---------------------------------|-------------------------------------|---------------------------------|---------------------------------|-------------------------------------|
|                         | 1990 No.<br>(95%UI)             | 2019 No.<br>(95%UI)             | Percentage<br>change (%)<br>(95%UI) | 1990 No.<br>(95%UI)             | 2019 No.<br>(95%UI)             | Percentage<br>change (%)<br>(95%UI) | 1990 No.<br>(95%UI)             | 2019 No.<br>(95%UI)             | Percentage<br>change (%)<br>(95%UI) |
| Global                  | 293572<br>(257425 to<br>336651) | 404552<br>(360521 to<br>456478) | 37.80 (33.91<br>to 41.98)           | 757137<br>(557008 to<br>914270) | 895798<br>(779706 to<br>999120) | 18.31 (-1.81<br>to 52.08)           | 491137<br>(326283 to<br>678806) | 726701<br>(487015 to<br>993466) | 47.96 (43.96<br>to 52.28)           |
| Sex                     |                                 |                                 |                                     |                                 |                                 |                                     |                                 |                                 |                                     |
| Male                    | 153074<br>(133344 to<br>174640) | 213814<br>(189759 to<br>241304) | 39.68 (36.00<br>to 43.73)           | 370299<br>(264345 to<br>462642) | 450214<br>(368766 to<br>507382) | 21.58 (-1.85<br>to 53.89)           | 230665<br>(152583 to<br>318772) | 352534<br>(235403 to<br>486701) | 52.83 (48.57<br>to 57.83)           |
| Female                  | 140498<br>(123361 to<br>161173) | 190738<br>(171154 to<br>213778) | 35.76 (31.29<br>to 39.92)           | 386839<br>(242819 to<br>477114) | 445584<br>(372799 to<br>510194) | 15.19 (-5.95<br>to 67.02)           | 260473<br>(173833 to<br>359493) | 374167<br>(251188 to<br>513406) | 43.65 (39.16<br>to 48.19)           |
| SDI quintile            |                                 |                                 |                                     |                                 |                                 |                                     |                                 |                                 |                                     |
| High                    | 171841<br>(151878 to<br>195746) | 196451<br>(179556 to<br>217510) | 14.32 (9.64<br>to 19.56)            | 139690<br>(129255 to<br>171300) | 268406<br>(221318 to<br>288862) | 92.14 (36.87<br>to 107.98)          | 275795<br>(183466 to<br>378544) | 334924<br>(229615 to<br>452309) | 21.44 (15.85<br>to 27.66)           |
| High-middle             | 71474<br>(62545 to<br>81510)    | 94553<br>(84101 to<br>107156)   | 32.29 (29.05<br>to 36.06)           | 149876<br>(130428 to<br>171308) | 151980<br>(137423 to<br>168345) | 1.40 (-11.32<br>to 17.80)           | 138460<br>(92476 to<br>192296)  | 200814<br>(133980 to<br>276597) | 45.03 (40.58<br>to 50.41)           |
| Middle                  | 27459<br>(23259 to<br>32310)    | 59817<br>(50973 to<br>70648)    | 117.84<br>(108.98 to<br>127.40)     | 201655<br>(144191 to<br>243718) | 167470<br>(141946 to<br>187219) | -16.95<br>(-32.64 to<br>19.35)      | 46484<br>(30292 to<br>65651)    | 123619<br>(80636 to<br>174495)  | 165.94<br>(155.28 to<br>177.70)     |
| Low-middle              | 17434<br>(14532 to<br>20935)    | 36681<br>(30862 to<br>44031)    | 110.40<br>(104.05 to<br>116.72)     | 179309<br>(103608 to<br>244139) | 184730<br>(144128 to<br>223656) | 3.02 (-21.85<br>to 54.27)           | 23711<br>(15318 to<br>33814)    | 51855<br>(33811 to<br>73563)    | 118.69<br>(110.14 to<br>127.95)     |
| Low                     | 5279 (4395<br>to 6379)          | 12215<br>(10164 to<br>14793)    | 131.41<br>(126.67 to<br>136.00)     | 86179<br>(39359 to<br>140538)   | 122638<br>(86434 to<br>167342)  | 42.31 (-5.62<br>to 150.88)          | 6540 (4199<br>to 9362)          | 15228 (9694<br>to 22000)        | 132.87<br>(123.17 to<br>142.33)     |
| GBD region              |                                 |                                 |                                     |                                 |                                 |                                     |                                 |                                 |                                     |
| Andean Latin<br>America | 472 (402 to<br>550)             | 1128 (975 to<br>1314)           | 138.95<br>(128.76 to<br>150.71)     | 10085 (4860<br>to 16590)        | 4311 (3237<br>to 5564)          | -57.25<br>(-76.23 to<br>-4.50)      | 682 (439 to<br>990)             | 1631 (1060<br>to 2311)          | 139.04<br>(119.92 to<br>161.86)     |
| Australasia             | 2979 (2556<br>to 3481)          | 6446 (5755<br>to 7212)          | 116.39<br>(101.08 to<br>132.24)     | 2212 (1997<br>to 2709)          | 5448 (4212<br>to 6156)          | 146.25 (61.5<br>to 182.75)          | 3590 (2340<br>to 5079)          | 7879 (5232<br>to 10860)         | 119.48<br>(94.61 to<br>145.44)      |
| Caribbean               | 677 (580 to<br>796)             | 1312 (1121<br>to 1571)          | 93.82 (84.67<br>to 103.42)          | 6186 (3853<br>to 10389)         | 6861 (4657<br>to 9603)          | 10.92<br>(-26.38 to<br>51.60)       | 1266 (836<br>to 1782)           | 2038 (1332<br>to 2893)          | 61.05 (49.16<br>to 73.60)           |
| Central Asia            | 3514 (2995<br>to 4146)          | 6461 (5487<br>to 7637)          | 83.87 (77.84<br>to 90.36)           | 9604 (7718<br>to 11578)         | 9458 (8184<br>to 10959)         | -1.52<br>(-20.39 to<br>17.35)       | 6348 (4181<br>to 9075)          | 10778 (7154<br>to 15134)        | 69.79 (58.22<br>to 81.49)           |

|                              |       |                          |                         |                           |                           |                           |                           |                           |                          |                           |
|------------------------------|-------|--------------------------|-------------------------|---------------------------|---------------------------|---------------------------|---------------------------|---------------------------|--------------------------|---------------------------|
|                              |       |                          |                         |                           |                           | 25.90)                    |                           |                           |                          |                           |
|                              |       | 20997                    | 14809                   | -29.47                    | 19517                     | 20261                     |                           | 42029                     | 34433                    | -18.07                    |
| Central Europe               |       | (18082 to 24170)         | (13443 to 16391)        | (-33.69 to -24.67)        | (17440 to 21350)          | (17005 to 23354)          | 3.81 (-12.56 to 21.14)    | (28219 to 58172)          | (23103 to 46581)         | (-23.95 to -11.37)        |
| Central America              | Latin | 3968 (3402 to 4618)      | 6754 (5834 to 7826)     | 70.22 (64.07 to 77.19)    | 11909 (10476 to 13363)    | 23887 (19416 to 28208)    | 100.58 (62.63 to 141.31)  | 6187 (4023 to 8802)       | 12291 (8076 to 17492)    | 98.64 (90.00 to 107.98)   |
| Central Sub-Saharan Africa   |       | 381 (318 to 469)         | 1150 (955 to 1400)      | 201.42 (188.00 to 216.18) | 9036 (4403 to 17181)      | 14431 (9735 to 21338)     | 59.71 (-15.47 to 217.75)  | 455 (291 to 663)          | 1142 (725 to 1644)       | 151.34 (136.85 to 168.27) |
| East Asia                    |       | 17567 (14627 to 20802)   | 52319 (44680 to 61455)  | 197.82 (178.88 to 220.44) | 202402 (132058 to 259475) | 101852 (80904 to 117925)  | -49.68 (-63.19 to -16.68) | 37829 (24646 to 53906)    | 138111 (90529 to 194304) | 265.09 (244.38 to 290.80) |
| Eastern Europe               |       | 18150 (15600 to 21209)   | 19500 (16838 to 22671)  | 7.44 (5.08 to 9.90)       | 39012 (29086 to 45400)    | 42550 (36378 to 48906)    | 9.07 (-8.79 to 41.38)     | 33920 (22663 to 47811)    | 34573 (23253 to 48708)   | 1.92 (-2.34 to 6.15)      |
| Eastern Sub-Saharan Africa   |       | 1092 (908 to 1315)       | 2938 (2449 to 3538)     | 168.96 (163.69 to 175.74) | 34323 (15796 to 66928)    | 49854 (36274 to 71146)    | 45.25 (-23.18 to 204.58)  | 1157 (736 to 1664)        | 3074 (1958 to 4469)      | 165.68 (159.54 to 172.36) |
| High-income Asia Pacific     |       | 18105 (15391 to 21422)   | 27084 (23870 to 30621)  | 49.59 (40.22 to 59.35)    | 14265 (11234 to 15903)    | 10285 (8672 to 13984)     | -27.90 (-41.19 to 11.39)  | 37434 (24881 to 52603)    | 68316 (45509 to 94577)   | 82.50 (67.39 to 99.60)    |
| High-income North America    |       | 107616 (94147 to 123884) | 99611 (91945 to 109000) | -7.44 (-13.45 to -0.48)   | 48899 (45188 to 60393)    | 111196 (90610 to 118997)  | 127.40 (58.53 to 147.53)  | 160173 (106818 to 221989) | 134037 (92136 to 178957) | -16.32 (-22.94 to -9.00)  |
| North Africa and Middle East |       | 8107 (7040 to 9204)      | 22722 (19277 to 26952)  | 180.29 (162.24 to 198.18) | 21634 (13448 to 31651)    | 30142 (25222 to 36090)    | 39.33 (-4.16 to 131.21)   | 13804 (8984 to 19350)     | 42612 (27805 to 59873)   | 208.69 (184.84 to 233.72) |
| Oceania                      |       | 22 (18 to 27)            | 63 (52 to 77)           | 181.23 (166.43 to 197.89) | 1003 (571 to 1593)        | 1628 (1040 to 2510)       | 62.31 (1.40 to 173.45)    | 33 (20 to 48)             | 69 (43 to 102)           | 109.64 (96.04 to 124.81)  |
| South Asia                   |       | 18439 (15169 to 22582)   | 39705 (32943 to 48454)  | 115.33 (107.88 to 123.07) | 146986 (82781 to 202629)  | 170233 (122056 to 222489) | 15.82 (-12.64 to 63.63)   | 24461 (15784 to 35449)    | 51744 (33609 to 74915)   | 111.54 (102.18 to 121.79) |
| Southeast Asia               |       | 1882 (1527 to 2270)      | 4980 (4182 to 5972)     | 164.62 (151.61 to 181.06) | 42561 (28111 to 54072)    | 38819 (32029 to 46584)    | -8.79 (-30.14 to 30.72)   | 2755 (1714 to 4108)       | 7867 (5022 to 11568)     | 185.53 (161.80 to 213.61) |
| Southern America             | Latin | 879 (742 to 1030)        | 1382 (1177 to 1620)     | 57.15 (49.53 to 64.67)    | 3794 (3293 to 4092)       | 5362 (4801 to 6325)       | 41.34 (23.31 to 66.99)    | 1454 (944 to 2091)        | 2377 (1528 to 3449)      | 63.53 (47.49 to 82.12)    |
| Southern Sub-Saharan Africa  |       | 504 (423 to 608)         | 989 (837 to 1188)       | 96.29 (90.20 to 103.76)   | 6007 (3712 to 8927)       | 7933 (6389 to 9558)       | 32.06 (-8.55 to 122.99)   | 608 (390 to 884)          | 1298 (837 to 1875)       | 113.43 (105.15 to 123.26) |
| Tropical America             | Latin | 7826 (6859 to 8976)      | 12928 (11334 to 14542)  | 65.19 (58.70 to 72.03)    | 16336 (14276 to 18400)    | 29155 (26876 to 31434)    | 78.46 (62.35 to 103.68)   | 11387 (7351 to 15958)     | 17842 (11730 to 23954)   | 56.68 (48.38 to 65.76)    |

|                                  |                        |                        |                                 |                              |                              |                            |                        |                        |                                 |
|----------------------------------|------------------------|------------------------|---------------------------------|------------------------------|------------------------------|----------------------------|------------------------|------------------------|---------------------------------|
|                                  |                        | 14874)                 |                                 | 18011)                       | 33305)                       |                            |                        | 25165)                 |                                 |
|                                  | 59081                  | 78645                  |                                 | 81826                        | 160823                       |                            | 103907                 | 149868                 |                                 |
| Western Europe                   | (53733 to<br>65529)    | (71611 to<br>86709)    | 33.11 (30.56<br>to 35.75)       | (75154 to<br>106409)         | (127602 to<br>175684)        | 96.54 (25.96<br>to 118.11) | (69789 to<br>141113)   | (101976 to<br>202986)  | 44.23 (39.12<br>to 49.03)       |
| Western<br>Sub-Saharan<br>Africa | 1314 (1102<br>to 1599) | 3628 (3028<br>to 4401) | 176.18<br>(171.94 to<br>180.47) | 29540<br>(12580 to<br>46343) | 51309<br>(30850 to<br>73337) | 73.69 (23.64<br>to 200.73) | 1657 (1057<br>to 2403) | 4717 (3002<br>to 6840) | 184.63<br>(179.19 to<br>190.47) |

Abbreviations: GBD=Global Burden of Disease. SDI=Socio-demographic Index. UI=uncertainty interval. YLDs=years of life lived with disability. YLLs=years of life lost.



**Supplementary Table 5** Age-standardised incidence, YLL and YLD rates for inflammatory bowel disease (IBD) in 1990 and 2019 and their temporal trends from 1990 to 2019

| Characteristics          | Age-standardised incidence rate |                           |                           | Age-standardized YLL rate |                           |                           | Age-standardized YLD rate |                           |                           |
|--------------------------|---------------------------------|---------------------------|---------------------------|---------------------------|---------------------------|---------------------------|---------------------------|---------------------------|---------------------------|
|                          | per 100,000 population          |                           |                           | per 100,000 population    |                           |                           | per 100,000 population    |                           |                           |
|                          | 1990 No.<br>(95%UI)             | 2019 No.<br>(95%UI)       | EAPC No.<br>(95%CI)       | 1990 No.<br>(95%UI)       | 2019 No.<br>(95%UI)       | EAPC No.<br>(95%CI)       | 1990 No.<br>(95%UI)       | 2019 No.<br>(95%UI)       | EAPC No.<br>(95%CI)       |
| Global                   | 6.10 (5.35<br>to 6.96)          | 4.97 (4.43<br>to 5.59)    | -0.60 (-0.73<br>to -0.48) | 16.47 (12.78<br>to 19.33) | 11.35 (9.89<br>to 12.70)  | -1.33 (-1.37<br>to -1.30) | 10.73 (7.16<br>to 14.82)  | 8.80 (5.90<br>to 12.05)   | -0.62 (-0.70<br>to -0.53) |
| Sex                      |                                 |                           |                           |                           |                           |                           |                           |                           |                           |
| Male                     | 6.39 (5.60<br>to 7.29)          | 5.30 (4.72<br>to 5.99)    | -0.55 (-0.68<br>to -0.43) | 17.08 (12.95<br>to 20.96) | 11.98 (9.82<br>to 13.45)  | -1.29 (-1.32<br>to -1.27) | 10.32 (6.91<br>to 14.27)  | 8.66 (5.80<br>to 11.93)   | -0.53 (-0.60<br>to -0.47) |
| Female                   | 5.80 (5.12<br>to 6.61)          | 4.64 (4.16<br>to 5.20)    | -0.65 (-0.78<br>to -0.53) | 15.95 (10.70<br>to 19.09) | 10.74 (8.88<br>to 12.44)  | -1.39 (-1.43<br>to -1.35) | 11.15 (7.43<br>to 15.41)  | 8.96 (6.02<br>to 12.30)   | -0.69 (-0.79<br>to -0.59) |
| SDI region               |                                 |                           |                           |                           |                           |                           |                           |                           |                           |
| High                     | 18.96<br>(16.73 to<br>21.58)    | 17.61 (16.03<br>to 19.41) | -0.16 (-0.30<br>to -0.01) | 14.41 (13.34<br>to 17.57) | 15.64 (13.09<br>to 16.73) | 0.56 (0.41<br>to 0.70)    | 29.54 (19.66<br>to 40.6)  | 27.29 (18.55<br>to 37.18) | -0.30 (-0.39<br>to -0.21) |
| High-middle              | 6.12 (5.36<br>to 6.99)          | 5.58 (4.97<br>to 6.28)    | -0.35 (-0.45<br>to -0.24) | 13.87 (12.06<br>to 15.79) | 8.37 (7.56<br>to 9.33)    | -1.99 (-2.11<br>to -1.88) | 12.05 (8.08<br>to 16.72)  | 10.97 (7.26<br>to 15.12)  | -0.26 (-0.40<br>to -0.13) |
| Middle                   | 1.83 (1.58<br>to 2.15)          | 2.27 (1.94<br>to 2.68)    | 1.07 (0.95<br>to 1.18)    | 14.68 (11.06<br>to 17.93) | 7 (5.95 to<br>7.79)       | -2.77 (-2.85<br>to -2.69) | 3.43 (2.26<br>to 4.84)    | 4.61 (3.01<br>to 6.52)    | 1.22 (1.01 to<br>1.43)    |
| Low-middle               | 2.00 (1.70<br>to 2.40)          | 2.21 (1.88<br>to 2.65)    | 0.46 (0.35<br>to 0.57)    | 20.36 (13.37<br>to 27.43) | 12.15 (9.66<br>to 14.61)  | -1.99 (-2.09<br>to -1.90) | 2.93 (1.93<br>to 4.16)    | 3.22 (2.12<br>to 4.56)    | 0.50 (0.38 to<br>0.62)    |
| Low                      | 1.46 (1.23<br>to 1.77)          | 1.52 (1.29<br>to 1.83)    | 0.37 (0.31<br>to 0.44)    | 20.24 (12.52<br>to 27.74) | 15.18 (11.82<br>to 19.54) | -1.08 (-1.14<br>to -1.02) | 1.95 (1.26<br>to 2.82)    | 2.02 (1.32<br>to 2.88)    | 0.28 (0.19 to<br>0.37)    |
| GBD region               |                                 |                           |                           |                           |                           |                           |                           |                           |                           |
| Andean Latin<br>America  | 1.63 (1.41<br>to 1.91)          | 1.82 (1.57<br>to 2.12)    | -0.05 (-0.29<br>to 0.20)  | 23.76 (13.24<br>to 36.33) | 7.15 (5.41<br>to 9.17)    | -4.50 (-5.07<br>to -3.92) | 2.6 (1.67 to<br>3.8)      | 2.68 (1.74<br>to 3.79)    | 0.05 (0.01 to<br>0.08)    |
| Australasia              | 13.56<br>(11.64 to<br>15.80)    | 20.03 (17.79<br>to 22.57) | 0.94 (0.72<br>to 1.16)    | 9.98 (9.01<br>to 12.07)   | 11.54 (8.93<br>to 13.01)  | 1.11 (0.82 to<br>1.41)    | 16.21 (10.57<br>to 22.95) | 23.45 (15.53<br>to 32.51) | 0.86 (0.63 to<br>1.09)    |
| Caribbean                | 2.11 (1.83<br>to 2.49)          | 2.63 (2.24<br>to 3.14)    | 0.49 (0.34<br>to 0.64)    | 19.10 (12.84<br>to 29.41) | 14.19 (9.36<br>to 20.49)  | -1.13 (-1.33<br>to -0.93) | 4.28 (2.83<br>to 6.06)    | 4.02 (2.62<br>to 5.72)    | -0.06 (-0.14<br>to 0.01)  |
| Central Asia             | 5.99 (5.13<br>to 7.07)          | 6.9 (5.87 to<br>8.13)     | 0.50 (0.46<br>to 0.53)    | 14.63 (11.46<br>to 17.20) | 10.56 (9.16<br>to 12.18)  | -1.41 (-1.54<br>to -1.29) | 11.48 (7.62<br>to 16.46)  | 11.7 (7.77 to<br>16.39)   | 0.08 (0.04 to<br>0.11)    |
| Central Europe           | 15.78<br>(13.61 to<br>18.19)    | 11.59 (10.51<br>to 12.81) | -1.38 (-1.76<br>to -0.99) | 15.87 (13.6<br>to 17.59)  | 11.95 (10.00<br>to 13.79) | -0.91 (-1.11<br>to -0.72) | 30.41 (20.26<br>to 42.11) | 23.89 (15.95<br>to 32.56) | -1.16 (-1.53<br>to -0.79) |
| Central Latin<br>America | 3.16 (2.74<br>to 3.66)          | 2.64 (2.29<br>to 3.06)    | -0.70 (-0.87<br>to -0.54) | 9.15 (8.21<br>to 10.10)   | 9.79 (7.96<br>to 11.55)   | 0.81 (0.47<br>to 1.16)    | 5.69 (3.74<br>to 8.02)    | 4.89 (3.22<br>to 6.96)    | -0.50 (-0.58<br>to -0.42) |
| Central<br>Sub-Saharan   | 1.04 (0.88<br>to 1.26)          | 1.26 (1.06<br>to 1.52)    | 0.64 (0.59<br>to 0.70)    | 20.92 (13.38<br>to 31.16) | 16.45 (11.73<br>to 22.99) | -0.84 (-0.92<br>to -0.75) | 1.33 (0.87<br>to 1.94)    | 1.32 (0.85<br>to 1.91)    | -0.16 (-0.35<br>to 0.04)  |

|                              |                        |                        |                        |                        |                        |                        |                        |                        |                        |  |
|------------------------------|------------------------|------------------------|------------------------|------------------------|------------------------|------------------------|------------------------|------------------------|------------------------|--|
| Africa                       |                        |                        |                        |                        |                        |                        |                        |                        |                        |  |
| East Asia                    | 1.45 (1.22 to 1.71)    | 2.95 (2.55 to 3.43)    | 2.54 (2.39 to 2.69)    | 20.78 (14.55 to 26.09) | 6.12 (4.90 to 7.03)    | -4.52 (-4.79 to -4.24) | 3.45 (2.26 to 4.87)    | 6.95 (4.57 to 9.69)    | 2.74 (2.37 to 3.12)    |  |
| Eastern Europe               | 7.10 (6.12 to 8.29)    | 7.34 (6.34 to 8.55)    | 0.07 (-0.02 to 0.17)   | 14.85 (11.23 to 17.29) | 14.46 (12.37 to 16.65) | -0.56 (-0.82 to -0.30) | 12.83 (8.55 to 18.05)  | 12.21 (8.15 to 17.24)  | 0.05 (-0.07 to 0.17)   |  |
| Eastern Sub-Saharan Africa   | 0.89 (0.76 to 1.07)    | 1.04 (0.88 to 1.25)    | 0.55 (0.48 to 0.61)    | 21.56 (15.07 to 32.54) | 18.27 (13.48 to 24.41) | -0.51 (-0.59 to -0.43) | 1.02 (0.66 to 1.46)    | 1.17 (0.76 to 1.67)    | 0.44 (0.40 to 0.48)    |  |
| High-income Asia Pacific     | 9.25 (7.88 to 10.91)   | 14.93 (13.14 to 16.93) | 1.10 (0.84 to 1.37)    | 7.85 (6.04 to 8.80)    | 2.74 (2.35 to 3.86)    | -4.07 (-4.38 to -3.77) | 18.58 (12.28 to 26.01) | 31.81 (21.06 to 44.06) | 1.11 (0.73 to 1.49)    |  |
| High-income North America    | 34.88 (30.59 to 40.02) | 24.51 (22.65 to 26.77) | -0.82 (-1.20 to -0.45) | 14.94 (13.84 to 18.40) | 20.18 (16.54 to 21.51) | 1.26 (1.03 to 1.50)    | 50.69 (33.71 to 70.19) | 31.1 (21.34 to 41.87)  | -1.28 (-1.69 to -0.86) |  |
| North Africa and Middle East | 2.95 (2.59 to 3.38)    | 3.74 (3.19 to 4.45)    | 0.62 (0.53 to 0.72)    | 8.82 (5.96 to 12.45)   | 6.06 (5.08 to 7.15)    | -1.32 (-1.36 to -1.29) | 5.55 (3.65 to 7.72)    | 7.21 (4.74 to 10.1)    | 0.88 (0.76 to 1.00)    |  |
| Oceania                      | 0.44 (0.36 to 0.52)    | 0.56 (0.47 to 0.67)    | 0.87 (0.76 to 0.98)    | 19.89 (12.45 to 28.10) | 14.30 (9.82 to 20.46)  | -1.32 (-1.41 to -1.23) | 0.71 (0.45 to 1.03)    | 0.63 (0.40 to 0.93)    | -0.53 (-0.72 to -0.34) |  |
| South Asia                   | 2.15 (1.79 to 2.64)    | 2.32 (1.93 to 2.84)    | 0.47 (0.31 to 0.63)    | 18.45 (11.93 to 26.19) | 10.91 (7.96 to 14.27)  | -2.10 (-2.23 to -1.97) | 3.02 (1.97 to 4.38)    | 3.08 (2.01 to 4.49)    | 0.25 (0.09 to 0.40)    |  |
| Southeast Asia               | 0.46 (0.38 to 0.56)    | 0.70 (0.59 to 0.84)    | 1.45 (1.27 to 1.63)    | 12.43 (7.76 to 15.13)  | 6.35 (5.08 to 7.61)    | -2.69 (-2.85 to -2.53) | 0.73 (0.46 to 1.09)    | 1.09 (0.7 to 1.60)     | 1.52 (1.22 to 1.83)    |  |
| Southern Latin America       | 1.82 (1.54 to 2.13)    | 1.92 (1.63 to 2.26)    | 0.24 (0.15 to 0.34)    | 8.05 (7.00 to 8.69)    | 6.85 (6.15 to 8.08)    | -0.71 (-0.86 to -0.56) | 3.05 (1.98 to 4.38)    | 3.21 (2.06 to 4.68)    | 0.23 (0.04 to 0.42)    |  |
| Southern Sub-Saharan Africa  | 1.30 (1.10 to 1.56)    | 1.37 (1.17 to 1.65)    | 0.13 (0.06 to 0.20)    | 13.43 (9.33 to 17.23)  | 11.79 (9.6 to 13.95)   | -0.20 (-0.55 to 0.15)  | 1.67 (1.08 to 2.41)    | 1.87 (1.22 to 2.70)    | 0.48 (0.41 to 0.55)    |  |
| Tropical Latin America       | 6.09 (5.40 to 6.93)    | 5.25 (4.60 to 6.03)    | -0.55 (-0.59 to -0.51) | 13.65 (11.97 to 14.87) | 12.09 (11.13 to 13.83) | -0.18 (-0.34 to -0.02) | 9.72 (6.37 to 13.54)   | 7.17 (4.71 to 10.10)   | -0.83 (-1.04 to -0.63) |  |
| Western Europe               | 13.98 (12.67 to 15.48) | 16.94 (15.33 to 18.73) | 0.60 (0.55 to 0.65)    | 16.07 (14.83 to 20.58) | 18.85 (15.12 to 20.42) | 0.92 (0.72 to 1.11)    | 23.17 (15.52 to 31.53) | 27.93 (19.01 to 38.12) | 0.38 (0.26 to 0.49)    |  |
| Western Sub-Saharan Africa   | 1.01 (0.86 to 1.23)    | 1.17 (1.00 to 1.41)    | 0.36 (0.22 to 0.50)    | 18.33 (10.38 to 29.12) | 15.14 (10.25 to 20.82) | -0.69 (-0.80 to -0.58) | 1.37 (0.89 to 1.98)    | 1.63 (1.06 to 2.34)    | 0.78 (0.66 to 0.90)    |  |

Abbreviations: CI=confidence interval. EAPC=estimated annual percentage change. GBD=Global Burden of Disease. SDI=Socio-demographic Index. UI=uncertainty interval. YLD=years of life lived with disability. YLL=years of life lost.
